# Supplementary material for: Integrated Multi-Omics Reveals Significant Roles of Non-Additively Expressed Small RNAs in Heterosis for Maize Plant Height
Source: Int J Mol Sci. 2023 May 23;24(11):9150. doi: 10.3390/ijms24119150 (PMC10252383; doi:10.3390/ijms24119150)
Supplement: Supplementary file 1 [file ijms-24-09150-s001.zip]

Archive with 8 entries (8 files):
- F1.sRNA_Supplementary_Figures_Tables_annotation.pdf
- Table-S1.xlsx
- Table-S2.xlsx
- Table-S3.xlsx
- Table-S4.xlsx
- Table-S5.xlsx
- Table-S6.xlsx
- Table-S7.xlsx
