# Supplementary material for: Integrated Multi-Omics Reveals Significant Roles of Non-Additively Expressed Small RNAs in Heterosis for Maize Plant Height
Source: Int J Mol Sci. 2023 May 23;24(11):9150. doi: 10.3390/ijms24119150 (PMC10252383; doi:10.3390/ijms24119150)
Supplement: Supplementary file 1 [file ijms-24-09150-s001.zip › Table-S1.xlsx]

## Sheet: New
Table S1. Information of miRNAs identified in the present study.
miRNA_Name	Source	miR_Family	Type	miRNA_Seq	miRNA_Length	Hairpin_ID	Hairpin_Seq	Hairpin_Length	Hairpin_Chr	Hairpin_Start	Hairpin_End	Strand	Novel_MiRRNA_Information
zma-miR528a-5p	miRBase	miR528	5p	TGGAAGGGGCATGCAGAGGAG	21	zma-MIR528a	GTGGAAGGGGCATGCAGAGGAGGAGCACGAGCGAGGTGTGGCTGGAAGAAGCAGCCGGGGCCTGTGTGCTATATACCCCTCGCAAGCTCTCCTCACTCCTCTCCTGTGCCTGCCTCTTCCATT	123	1	6412284	6412406	+	-
zma-miR528a-3p	miRBase	miR528	3p	CCTGTGCCTGCCTCTTCCATT	21	zma-MIR528a	GTGGAAGGGGCATGCAGAGGAGGAGCACGAGCGAGGTGTGGCTGGAAGAAGCAGCCGGGGCCTGTGTGCTATATACCCCTCGCAAGCTCTCCTCACTCCTCTCCTGTGCCTGCCTCTTCCATT	123	1	6412284	6412406	+	-
zma-miR171e-5p	miRBase	miR171	5p	TGTTGGCTCGGCTCACTCAGA	21	zma-MIR171e	AGAAATGGAATAGTAGCTATGATGTTGGCTCGGCTCACTCAGACGACGTACGCGCGCGAGATCATGTGCTATGCCGCTGCTGTTTCTGATTGAGCCGTGCCAATATCTTAGTACTCTTCCATGCAT	126	1	7976712	7976837	+	-
zma-miR171e-3p	miRBase	miR171	3p	TGATTGAGCCGTGCCAATATC	21	zma-MIR171e	AGAAATGGAATAGTAGCTATGATGTTGGCTCGGCTCACTCAGACGACGTACGCGCGCGAGATCATGTGCTATGCCGCTGCTGTTTCTGATTGAGCCGTGCCAATATCTTAGTACTCTTCCATGCAT	126	1	7976712	7976837	+	-
zma-miR167j-5p	miRBase	miR167	5p	TGAAGCTGCCAGCATGATCTG	21	zma-MIR167j	ATGAAGCTGCCAGCATGATCTGAAACCATACGTGTTCTTTGATTCCCATCTGAAGAAAGAGTTGGCTTTCATGGAGAACCGACGGTCAGATCATGTGGCAGTTTCATTT	109	1	12791799	12791907	+	-
zma-miR167j-3p	miRBase	miR167	3p	GATCATGTGGCAGTTTCATT	20	zma-MIR167j	ATGAAGCTGCCAGCATGATCTGAAACCATACGTGTTCTTTGATTCCCATCTGAAGAAAGAGTTGGCTTTCATGGAGAACCGACGGTCAGATCATGTGGCAGTTTCATTT	109	1	12791799	12791907	+	-
zma-miR166g-5p	miRBase	miR166	5p	GGAATGTTGTCTGGTTGGAGA	21	zma-MIR166g	GGGGAATGTTGTCTGGTTGGAGACCTAACACCGCGAATTAATCATCCATGCCATGGAAGCAGCATATGCCCGCCTGCATCTATCCATGCATGATGGTGGAAGGTTTCGGACCAGGCTTCATTCCCC	126	1	13782628	13782753	+	-
zma-miR166g-3p	miRBase	miR166	3p	TCGGACCAGGCTTCATTCCC	20	zma-MIR166g	GGGGAATGTTGTCTGGTTGGAGACCTAACACCGCGAATTAATCATCCATGCCATGGAAGCAGCATATGCCCGCCTGCATCTATCCATGCATGATGGTGGAAGGTTTCGGACCAGGCTTCATTCCCC	126	1	13782628	13782753	+	-
zma-miR164e-5p	miRBase	miR164	5p	TGGAGAAGCAGGACACGTGAG	21	zma-MIR164e	GTGGAGAAGCAGGACACGTGAGCGACCATCCAGTTCCACTCCCGCTGGCTCGCTGCTGGAGCTCCCGGCGGCTTGGTGAGTTTGGGTGGTCGTTCATGTGTCCGCCCTCTCCACCG	116	1	47137796	47137911	+	-
zma-miR164e-3p	miRBase	miR164	3p	CATGTGTCCGCCCTCTCCACC	21	zma-MIR164e	GTGGAGAAGCAGGACACGTGAGCGACCATCCAGTTCCACTCCCGCTGGCTCGCTGCTGGAGCTCCCGGCGGCTTGGTGAGTTTGGGTGGTCGTTCATGTGTCCGCCCTCTCCACCG	116	1	47137796	47137911	+	-
zma-miR166b-5p.1_226759256	miRBase	miR166	5p	GGAATGTTGTCTGGTTCAAGG	21	zma-MIR166b	GTGGAATGTTGTCTGGTTCAAGGTCTTGCTTTCCGATTTGAGGATGATCCATGCTTGCATGTGTAGTTTTTTTTGTTCCTCAGATCTACAAGATCTCGGACCAGGCTTCATTCCCC	116	1	226759256	226759371	-	-
zma-miR166b-3p.1_226759256	miRBase	miR166	3p	TCGGACCAGGCTTCATTCCC	20	zma-MIR166b	GTGGAATGTTGTCTGGTTCAAGGTCTTGCTTTCCGATTTGAGGATGATCCATGCTTGCATGTGTAGTTTTTTTTGTTCCTCAGATCTACAAGATCTCGGACCAGGCTTCATTCCCC	116	1	226759256	226759371	-	-
zma-miR166i-5p	miRBase	miR166	5p	GGAATGTCGTCTGGCGCGAGA	21	zma-MIR166i	GGGGAATGTCGTCTGGCGCGAGACCGTACCAGACGACGTGCTCTCTCGGTCGTCGGACGGTCTCGGACCAGGCTTCATTCCCC	83	1	244940015	244940097	+	-
zma-miR166i-3p	miRBase	miR166	3p	TCGGACCAGGCTTCATTCCC	20	zma-MIR166i	GGGGAATGTCGTCTGGCGCGAGACCGTACCAGACGACGTGCTCTCTCGGTCGTCGGACGGTCTCGGACCAGGCTTCATTCCCC	83	1	244940015	244940097	+	-
zma-miR171l-5p	miRBase	miR171	5p	TATTGGCGTGCCTCAATCCGA	21	zma-MIR171l	GTATTGGCGTGCCTCAATCCGAAGGCGTGGCTGACTGGCGCGGCAGCCATGTTCTTGGATTGAGCCGCGTCAATATCT	78	1	249547375	249547452	+	-
zma-miR171l-3p	miRBase	miR171	3p	GGATTGAGCCGCGTCAATATC	21	zma-MIR171l	GTATTGGCGTGCCTCAATCCGAAGGCGTGGCTGACTGGCGCGGCAGCCATGTTCTTGGATTGAGCCGCGTCAATATCT	78	1	249547375	249547452	+	-
zma-miR171i-3p	miRBase	miR171	3p	TGATTGAGCCGTGCCAATATC	21	zma-MIR171i	CTGGTTGGCTGAGAGAGTGCGATGTTGGCACGGTTCAATCAAATCGCCGGCCGGGTTGACTTGTTGATTGAGCCGTGCCAATATCACAACCTTCTCTAGCCTAG	104	1	278093492	278093595	+	-
zma-miR166h-5p	miRBase	miR166	5p	GGAATGACGTCCGGTCCGAAC	21	zma-MIR166h	GGGGAATGACGTCCGGTCCGAACGAGCCACGGCTGCTGCTGCGCCGCCGCGGGCTTCGGACCAGGCTTCATTCCCC	76	1	279585912	279585987	-	-
zma-miR166h-3p	miRBase	miR166	3p	TCGGACCAGGCTTCATTCCC	20	zma-MIR166h	GGGGAATGACGTCCGGTCCGAACGAGCCACGGCTGCTGCTGCGCCGCCGCGGGCTTCGGACCAGGCTTCATTCCCC	76	1	279585912	279585987	-	-
zma-miR160d-5p	miRBase	miR160	5p	TGCCTGGCTCCCTGTATGCCA	21	zma-MIR160d	GGCCAGGGGCGGGATCGATATGCCTGGCTCCCTGTATGCCACTCGCATGGCTGCCAACTCATCATGCATACACTGCTAGCTAGTCGTTGGCTCCACTGCGGATGGCGTGCGTGGAGCCAAGCATGACCGATCATCTCCTCCT	142	1	288700634	288700775	-	-
zma-miR167d-5p	miRBase	miR167	5p	TGAAGCTGCCAGCATGATCTA	21	zma-MIR167d	TGCCCAAGGGAACGAGTGAAGCTGCCAGCATGATCTAGCTCTGAGTGATCACCCGAAAAAGAACAATAGTTCTAGGTGGTCATGCCTTGCTAGGTCATGCTGCTGCAGCCTCACTTCTTCCCGTCGTTGGGCA	133	1	292918639	292918771	-	-
zma-miR167d-3p	miRBase	miR167	3p	GGTCATGCTGCTGCAGCCTCACT	23	zma-MIR167d	TGCCCAAGGGAACGAGTGAAGCTGCCAGCATGATCTAGCTCTGAGTGATCACCCGAAAAAGAACAATAGTTCTAGGTGGTCATGCCTTGCTAGGTCATGCTGCTGCAGCCTCACTTCTTCCCGTCGTTGGGCA	133	1	292918639	292918771	-	-
zma-miR390a-5p	miRBase	miR390	5p	AAGCTCAGGAGGGATAGCGCC	21	zma-MIR390a	GAAGCTCAGGAGGGATAGCGCCTAGGAAAACACATAGATCGGAGCCGGCCGCGAGGAGAAAGAAAGAGCCAAGAGATATGTGTGATGAATAATCTACATGGATCTTGGCTAGCTTTTGTGTTCTCCTCTGGAGGCGTGGTTCTGTCTATCAATCTGAAGCGCTATCTATCCTGAGCTCCAC	181	1	298107396	298107576	+	-
zma-miR390a-3p	miRBase	miR390	3p	CGCTATCTATCCTGAGCTCCA	21	zma-MIR390a	GAAGCTCAGGAGGGATAGCGCCTAGGAAAACACATAGATCGGAGCCGGCCGCGAGGAGAAAGAAAGAGCCAAGAGATATGTGTGATGAATAATCTACATGGATCTTGGCTAGCTTTTGTGTTCTCCTCTGGAGGCGTGGTTCTGTCTATCAATCTGAAGCGCTATCTATCCTGAGCTCCAC	181	1	298107396	298107576	+	-
zma-miR169l-5p	miRBase	miR169	5p	TAGCCAGGGATGATTTGCCTG	21	zma-MIR169l	GTAGCCAGGGATGATTTGCCTGTGGTTCCTGTCGTTGCCATGCCAATGCCTGTACTGTTCGATCTACGGGCAAATCATCCCTGCTACCG	89	1	303772025	303772113	+	-
zma-miR169l-3p	miRBase	miR169	3p	GGCAAATCATCCCTGCTACC	20	zma-MIR169l	GTAGCCAGGGATGATTTGCCTGTGGTTCCTGTCGTTGCCATGCCAATGCCTGTACTGTTCGATCTACGGGCAAATCATCCCTGCTACCG	89	1	303772025	303772113	+	-
zma-miR393a-5p	miRBase	miR393	5p	TCCAAAGGGATCGCATTGATCT	22	zma-MIR393a	CCAGGAAGCTGGTGGAGGACTCCAAAGGGATCGCATTGATCTATTCTCACCTGCCGCCTGCTGCATGCGATGCGAGTCGACGACAAGATCAGTGCAATCCCTTTGGAATTTTCCACTCGCGCCTTC	126	2	738724	738849	+	-
zma-miR393a-3p	miRBase	miR393	3p	ATCAGTGCAATCCCTTTGGAAT	22	zma-MIR393a	CCAGGAAGCTGGTGGAGGACTCCAAAGGGATCGCATTGATCTATTCTCACCTGCCGCCTGCTGCATGCGATGCGAGTCGACGACAAGATCAGTGCAATCCCTTTGGAATTTTCCACTCGCGCCTTC	126	2	738724	738849	+	-
zma-miR396c	miRBase	miR396	5p	TTCCACAGGCTTTCTTGAACTG	22	zma-MIR396c	CGGGCATGCTTTCCACAGGCTTTCTTGAACTGTGAACTCGTGGGTGGTGGTGGTATGTCGGATGGAATGCTTGG	74	2	1951700	1951773	-	-
zma-miR395d-3p	miRBase	miR395	3p	GTGAAGTGTTTGGGGGAACTC	21	zma-MIR395d	AGTTCTATGCAAGCACTTCACGAGGCATTGTTTCAAGAGCTTTTGTGAAGTGTTTGGGGGAACTCT	66	2	6276291	6276356	-	-
zma-miR395f-3p	miRBase	miR395	3p	GTGAAGTGTTTGGGGGAACTC	21	zma-MIR395f	AGTTACCTACAAGCACGTCTCGATACCTTGGCTTAATAAAGGCCAGTTGTGAAGTGTTTGGGGGAACTCT	70	2	6276947	6277016	-	-
zma-miR395g-3p	miRBase	miR395	3p	GTGAAGTGTTTGGGGGAACTC	21	zma-MIR395g	AGTTCTATGCAAGCACTTCACGAGGCATTGTTTCAAGAGCTTTTGTGAAGTGTTTGGGGGAACTCT	66	2	6277107	6277172	-	-
zma-miR395e-5p	miRBase	miR395	5p	GTTCCCTTCAAGCACTTCACAT	22	zma-MIR395e	AGTTCCCTTCAAGCACTTCACATGAGGCACCATTCAAATAACACATTTCAAGATTAGGTGCATGTGAAGTGTTTGGGGGAACTCT	85	2	6286411	6286495	-	-
zma-miR395e-3p	miRBase	miR395	3p	GTGAAGTGTTTGGGGGAACTC	21	zma-MIR395e	AGTTCCCTTCAAGCACTTCACATGAGGCACCATTCAAATAACACATTTCAAGATTAGGTGCATGTGAAGTGTTTGGGGGAACTCT	85	2	6286411	6286495	-	-
zma-miR395i-5p	miRBase	miR395	5p	GTTCCCTACAAGCACTTCACGA	22	zma-MIR395i	AGTTCCCTACAAGCACTTCACGATACCTTGGCTTAATAAAGGCCAGTTGTGAAGTGTTTGGGGGAACTCT	70	2	6286588	6286657	-	-
zma-miR395i-3p	miRBase	miR395	3p	GTGAAGTGTTTGGGGGAACTC	21	zma-MIR395i	AGTTCCCTACAAGCACTTCACGATACCTTGGCTTAATAAAGGCCAGTTGTGAAGTGTTTGGGGGAACTCT	70	2	6286588	6286657	-	-
zma-miR395h-5p	miRBase	miR395	5p	GTTCCCTTCAAGCACTTCACAT	22	zma-MIR395h	AGTTCCCTTCAAGCACTTCACATGAGGCACCATTCAAATAACACATTTCAAGATTAGGTGCATGTGAAGTGTTTGGGGGAACTCT	85	2	6287229	6287313	-	-
zma-miR395h-3p	miRBase	miR395	3p	GTGAAGTGTTTGGGGGAACTC	21	zma-MIR395h	AGTTCCCTTCAAGCACTTCACATGAGGCACCATTCAAATAACACATTTCAAGATTAGGTGCATGTGAAGTGTTTGGGGGAACTCT	85	2	6287229	6287313	-	-
zma-miR395b-5p	miRBase	miR395	5p	GTTCCCTACAAGCACTTCACAA	22	zma-MIR395b	GCAACGTTTTGTGTTACTAGGAGTTCCCTACAAGCACTTCACAATACCTTGGCTCAATAAATTAAAGGCCAGTTGTGAAGTGTTTGGGGGAACTCTTGGTATCATGAAGCATTT	114	2	6287388	6287501	-	-
zma-miR395b-3p	miRBase	miR395	3p	GTGAAGTGTTTGGGGGAACTC	21	zma-MIR395b	GCAACGTTTTGTGTTACTAGGAGTTCCCTACAAGCACTTCACAATACCTTGGCTCAATAAATTAAAGGCCAGTTGTGAAGTGTTTGGGGGAACTCTTGGTATCATGAAGCATTT	114	2	6287388	6287501	-	-
zma-miR395a-5p	miRBase	miR395	5p	GTTCTCCTCAAACCACTTCAGTT	23	zma-MIR395a	TATTGGTTGGTTGTCACCTGGAGTTCTCCTCAAACCACTTCAGTTGCTGCACCTAGCTAGTTTAATGGCACTGTGCTTGCGTGCAAGCGGCCGGAGCTGTGTGTAGCTAGTGAAGTGTTTGGGGGAACTCTGGGTGTCAATCAGCAATT	149	2	6288043	6288191	-	-
zma-miR395a-3p	miRBase	miR395	3p	GTGAAGTGTTTGGGGGAACTC	21	zma-MIR395a	TATTGGTTGGTTGTCACCTGGAGTTCTCCTCAAACCACTTCAGTTGCTGCACCTAGCTAGTTTAATGGCACTGTGCTTGCGTGCAAGCGGCCGGAGCTGTGTGTAGCTAGTGAAGTGTTTGGGGGAACTCTGGGTGTCAATCAGCAATT	149	2	6288043	6288191	-	-
zma-miR171c-5p	miRBase	miR171	5p	TATTGGTGCGGTTCAATCAGA	21	zma-MIR171c	GGGGAATCGAAAACCTACGGGATATTGGTGCGGTTCAATCAGAAAGCTTGCGCTCCAAAGCCCAGGGGCTCCACTCTTTGACTGAGCCGTGCCAATATCACGTCCTCGCTTTGCTTGC	118	2	9079646	9079763	+	-
zma-miR171c-3p	miRBase	miR171	3p	TGACTGAGCCGTGCCAATATC	21	zma-MIR171c	GGGGAATCGAAAACCTACGGGATATTGGTGCGGTTCAATCAGAAAGCTTGCGCTCCAAAGCCCAGGGGCTCCACTCTTTGACTGAGCCGTGCCAATATCACGTCCTCGCTTTGCTTGC	118	2	9079646	9079763	+	-
zma-miR169c-5p	miRBase	miR169	5p	CAGCCAAGGATGACTTGCCGG	21	zma-MIR169c	ATGAGGTAGAGAACGGGATGCAGCCAAGGATGACTTGCCGGCTCCTGGAACCTGGAGGCGTCTCAGCTTGCTGTGCTGTGGCTTAGAACTTAGTCGGCAAGTCTGTCCTTGGCTACACCTAGTTCTCTTCCTCT	134	2	11553338	11553471	+	-
zma-miR169c-3p	miRBase	miR169	3p	GGCAAGTCTGTCCTTGGCTACA	22	zma-MIR169c	ATGAGGTAGAGAACGGGATGCAGCCAAGGATGACTTGCCGGCTCCTGGAACCTGGAGGCGTCTCAGCTTGCTGTGCTGTGGCTTAGAACTTAGTCGGCAAGTCTGTCCTTGGCTACACCTAGTTCTCTTCCTCT	134	2	11553338	11553471	+	-
zma-miR399e-5p	miRBase	miR399	5p	GGGCTTCTCTTTCTTGGCAGG	21	zma-MIR399e	ATGCCTAAGCTGTCCAGTTTCAGGGCTTCTCTTTCTTGGCAGGGAAGCATGAGATGCCATAGCTCTCTGCTCTCTTCAACCCTCTGCCAAAGGAGAGTTGCCCTGTAACAGGACTCAGCTTATG	124	2	16763309	16763432	-	-
zma-miR399e-3p	miRBase	miR399	3p	TGCCAAAGGAGAGTTGCCCTG	21	zma-MIR399e	ATGCCTAAGCTGTCCAGTTTCAGGGCTTCTCTTTCTTGGCAGGGAAGCATGAGATGCCATAGCTCTCTGCTCTCTTCAACCCTCTGCCAAAGGAGAGTTGCCCTGTAACAGGACTCAGCTTATG	124	2	16763309	16763432	-	-
zma-miR171h-5p	miRBase	miR171	5p	TGGTATTGTTTCGGCTCATGT	21	zma-MIR171h	GGGAGGAAGGAGACGACATGGCGTGGTATTGTTTCGGCTCATGTCCTTCTTCGATCGAGTCTTGCCGTTGGATTTGGATGTGATGTGAGCCGAACCAATATCACTCATGTACTCTTCATTCCCA	124	2	18027100	18027223	-	-
zma-miR171h-3p	miRBase	miR171	3p	GTGAGCCGAACCAATATCACT	21	zma-MIR171h	GGGAGGAAGGAGACGACATGGCGTGGTATTGTTTCGGCTCATGTCCTTCTTCGATCGAGTCTTGCCGTTGGATTTGGATGTGATGTGAGCCGAACCAATATCACTCATGTACTCTTCATTCCCA	124	2	18027100	18027223	-	-
zma-miR156e-5p	miRBase	miR156	5p	TGACAGAAGAGAGTGAGCAC	20	zma-MIR156e	CCGGCGGGCGCGCGCGCGGTGACAGAAGAGAGTGAGCACACGGCCGGTGTGACGGCACCGGCGCGGATGTGCCGTCGCGGCCGCGTGCTCACTGCTCTCTCTGTCATCCGCTGGCACACCCTCACG	126	2	33005026	33005151	+	-
zma-miR156e-3p	miRBase	miR156	3p	GCTCACTGCTCTCTCTGTCATC	22	zma-MIR156e	CCGGCGGGCGCGCGCGCGGTGACAGAAGAGAGTGAGCACACGGCCGGTGTGACGGCACCGGCGCGGATGTGCCGTCGCGGCCGCGTGCTCACTGCTCTCTCTGTCATCCGCTGGCACACCCTCACG	126	2	33005026	33005151	+	-
zma-miR2118b	miRBase	miR2118	3p	TTCCCGATGCCTCCCATTCCTA	22	zma-MIR2118b	TAAGAGCAGTGGGAATGGGAACATGGAGGAAAGCCCATCCTGTTGGTTTCCTCCTCCAGAAACCGAGGTGGAAGCTTGGTTCGGTGTTTCCCGATGCCTCCCATTCCTATTGTTCTTA	118	2	51342905	51343022	+	-
zma-miR2118d	miRBase	miR2118	3p	TTCCTGATGCCTCCCATGCCTA	22	zma-MIR2118d	GTGAGCATGGAAGAGGAAGAGAGGGTCTAAGAGCAGTGGGCATGGGAACACGGAGGAAGGCCTATGAGTGGAAAGCTCATTTTGGGTCTTCCTGATGCCTCCCATGCCTATCGTTGTTAGGTGCTCCTTCCTCTTGCTTTTGGCTCAC	148	2	51343097	51343244	+	-
zma-miR169g	miRBase	miR169	5p	TAGCCAAGGATGACTTGCCTA	21	zma-MIR169g	CAGAGCTAGCCTGCCTCTGGTAGCCAAGGATGACTTGCCTACATGGTCTCGCTAGTTCCGGTTGTTGCATGCATGCCACTATGCCAGTCCTGCTGGGTTTGTGGGCGGTCTCCTTGGCTAGCCTGAGTGGCTCTTGCCTG	140	2	67281149	67281288	+	-
zma-miR398a-5p	miRBase	miR398	5p	GGGGCGAACTGAGAACACATG	21	zma-MIR398a	GGGGGCGAACTGAGAACACATGAGAATAATGAGATGAGATTGCTCGCCTCGCGGTACGGTTCGTGCTGGCCTGGACCACCGTCGTCGCCGTTCATCTTGTACGCATAATAATGCTGCATGTGTTCTCAGGTCGCCCCCGC	140	2	174319898	174320037	+	-
zma-miR398a-3p	miRBase	miR398	3p	TGTGTTCTCAGGTCGCCCCCG	21	zma-MIR398a	GGGGGCGAACTGAGAACACATGAGAATAATGAGATGAGATTGCTCGCCTCGCGGTACGGTTCGTGCTGGCCTGGACCACCGTCGTCGCCGTTCATCTTGTACGCATAATAATGCTGCATGTGTTCTCAGGTCGCCCCCGC	140	2	174319898	174320037	+	-
zma-miR156f-5p	miRBase	miR156	5p	TGACAGAAGAGAGTGAGCAC	20	zma-MIR156f	TGGCTGCTAGATGGTGTGGCTGACAGAAGAGAGTGAGCACGCATCGGCCAGACTGCATCTATATACGGCTGCCCCAAAGCGACGGATCGATGGATGCCTAGCCTAGGCCTAGGCGCAGCTGCTGTTGCGTGCTCACTTCTCTTTCTGTCAGCTCTCTCTCTCATCCT	167	2	185613978	185614144	-	-
zma-miR156f-3p	miRBase	miR156	3p	GCTCACTTCTCTTTCTGTCAGC	22	zma-MIR156f	TGGCTGCTAGATGGTGTGGCTGACAGAAGAGAGTGAGCACGCATCGGCCAGACTGCATCTATATACGGCTGCCCCAAAGCGACGGATCGATGGATGCCTAGCCTAGGCCTAGGCGCAGCTGCTGTTGCGTGCTCACTTCTCTTTCTGTCAGCTCTCTCTCTCATCCT	167	2	185613978	185614144	-	-
zma-miR169j-5p	miRBase	miR169	5p	TAGCCAAGGATGACTTGCCTG	21	zma-MIR169j	GCGATAAGAGTCTGTCCAGATAGCCAAGGATGACTTGCCTGTGGCTTCTTGGCTTGGCTTGGCTCGGGCAAAACCTTGTGCACGTTTTATTGCTCGCCTCGTGGCCTCGATCACAGGCAGTCTCCTTGGCTAGTCCGGGCGGGCCCCTTAT	151	2	198435908	198436058	+	-
zma-miR169j-3p	miRBase	miR169	3p	GGCAGTCTCCTTGGCTAG	18	zma-MIR169j	GCGATAAGAGTCTGTCCAGATAGCCAAGGATGACTTGCCTGTGGCTTCTTGGCTTGGCTTGGCTCGGGCAAAACCTTGTGCACGTTTTATTGCTCGCCTCGTGGCCTCGATCACAGGCAGTCTCCTTGGCTAGTCCGGGCGGGCCCCTTAT	151	2	198435908	198436058	+	-
zma-miR11969-3p	miRBase	miR11969	3p	TTATACCCATCTCTCACCTTGCAA	24	zma-MIR11969	CGTTAGTGGAAATCAGAATTAGTGATTAAAAAACAAGGGGTAAAATGATAATTGCAAGGTCAGAGAAGGATATAATCACAATTAATTTTCAGGGTTAATTGTGATTATACCCATCTCTCACCTTGCAATTGTGATTTTACCCCTCGTTTTATTTTATTTTATTCACGAATTCTGATTTTCACTAACG	187	2	201270471	201270657	+	-
zma-miR164a-5p	miRBase	miR164	5p	TGGAGAAGCAGGGCACGTGCA	21	zma-MIR164a	CAGTGACAAGGACCACGCTGGAGAAGCAGGGCACGTGCATGCGCATACCATATAGCTAGACGATGTTCTCTCTCGCTCCGCTCGACCAAGCTTCATGTATGGATGGGTACGCACGCACGTGTTCTCCTTCTCCATCGAGGTCTTTCTCACTT	152	2	223401157	223401308	-	-
zma-miR164a-3p	miRBase	miR164	3p	CACGTGTTCTCCTTCTCCATC	21	zma-MIR164a	CAGTGACAAGGACCACGCTGGAGAAGCAGGGCACGTGCATGCGCATACCATATAGCTAGACGATGTTCTCTCTCGCTCCGCTCGACCAAGCTTCATGTATGGATGGGTACGCACGCACGTGTTCTCCTTCTCCATCGAGGTCTTTCTCACTT	152	2	223401157	223401308	-	-
zma-miR160f-5p	miRBase	miR160	5p	TGCCTGGCTCCCTGTATGCCG	21	zma-MIR160f	GAGGTGAAAGATAGGGAATATGCCTGGCTCCCTGTATGCCGCTCGCATGGCTACCACCGCCTGTGGTCGTTGCGGCTGGCGTGCGAGGTGCCAGGCATGTTTTAATAATTATCTCC	116	2	241093436	241093551	-	-
zma-miR159c-5p	miRBase	miR159	5p	GAGCTCCCTTCGATCCAATCC	21	zma-MIR159c	ATGATTAAGAAAGGCGATCGAAGAGCTCCCTTCGATCCAATCCAGGAGGGGAAGTGGTCGGTTGCAGCTGCCGGTTCATGGATACCTCTCTGGTGCAGCAATGGCCGCTGCTCACCTCTGCACTTGCATGGGTGTGCATGACCCGGGAGATGAGCCCGCCATCATCTTTCCCTCGTGCTTGGATTGAAGGGAGCTCCTCTCTGTCTGTCTGTCTGTC	217	3	2020760	2020976	-	-
zma-miR159c-3p	miRBase	miR159	3p	CTTGGATTGAAGGGAGCTCCT	21	zma-MIR159c	ATGATTAAGAAAGGCGATCGAAGAGCTCCCTTCGATCCAATCCAGGAGGGGAAGTGGTCGGTTGCAGCTGCCGGTTCATGGATACCTCTCTGGTGCAGCAATGGCCGCTGCTCACCTCTGCACTTGCATGGGTGTGCATGACCCGGGAGATGAGCCCGCCATCATCTTTCCCTCGTGCTTGGATTGAAGGGAGCTCCTCTCTGTCTGTCTGTCTGTC	217	3	2020760	2020976	-	-
zma-miR319b-5p	miRBase	miR319	5p	AGAGCGTCCTTCAGTCCACTC	21	zma-MIR319b	GACGACGATGGCTGGATGGAAGAGAGCGTCCTTCAGTCCACTCAGGGGCGGTGCTAGGGTCGAATTAGCTGCCGACTCATTCACCCACATGCCAAGCAAACGGCCATGGAAACCAGCTTTGCAGATGAGTGAATGAAGCGGGAGGTAAAAGCTTCGATCTCGCACCGTCTTTGCTTGGACTGAAGGGTGCTCCCTCCTCCCTCGCTCCTTGTT	213	3	2038966	2039178	+	-
zma-miR319b-3p	miRBase	miR319	3p	TTGGACTGAAGGGTGCTCCC	20	zma-MIR319b	GACGACGATGGCTGGATGGAAGAGAGCGTCCTTCAGTCCACTCAGGGGCGGTGCTAGGGTCGAATTAGCTGCCGACTCATTCACCCACATGCCAAGCAAACGGCCATGGAAACCAGCTTTGCAGATGAGTGAATGAAGCGGGAGGTAAAAGCTTCGATCTCGCACCGTCTTTGCTTGGACTGAAGGGTGCTCCCTCCTCCCTCGCTCCTTGTT	213	3	2038966	2039178	+	-
zma-miR156b-5p	miRBase	miR156	5p	TGACAGAAGAGAGTGAGCAC	20	zma-MIR156b	AGATGAGTTTTTTGAAGGTTTGACAGAAGAGAGTGAGCACACACGGTGGTTTCTTACCATGAGTGTCATGCTAGGAGCTGTGCGTGCTCACCCTCTATCTGTCAGTCACTCATCAAGCCCATCT	124	3	6928278	6928401	-	-
zma-miR156b-3p	miRBase	miR156	3p	GCTCACCCTCTATCTGTCAGT	21	zma-MIR156b	AGATGAGTTTTTTGAAGGTTTGACAGAAGAGAGTGAGCACACACGGTGGTTTCTTACCATGAGTGTCATGCTAGGAGCTGTGCGTGCTCACCCTCTATCTGTCAGTCACTCATCAAGCCCATCT	124	3	6928278	6928401	-	-
zma-miR393b-5p	miRBase	miR393	5p	TCCAAAGGGATCGCATTGATCC	22	zma-MIR393b	GTCCAAAGGGATCGCATTGATCCATCATTCCTTCCATTTTTTCATGCATGGCTGGTCTTCGTCGTCTGCAAGGACTTGTCGATGGATCAATGCGATCCTTTTGGAGGC	108	3	17997197	17997304	+	-
zma-miR393b-3p	miRBase	miR393	3p	ATCAATGCGATCCTTTTGGAGG	22	zma-MIR393b	GTCCAAAGGGATCGCATTGATCCATCATTCCTTCCATTTTTTCATGCATGGCTGGTCTTCGTCGTCTGCAAGGACTTGTCGATGGATCAATGCGATCCTTTTGGAGGC	108	3	17997197	17997304	+	-
zma-miR159f-5p	miRBase	miR159	5p	GAGCTCCTCTCATTCCAATGA	21	zma-MIR159f	GGAGCTCCTCTCATTCCAATGAAGGGTCCTTCCGAAGGGTGGTTCCGCTGCTCGTTCATGGTTCCCACTATCCTATCTCATCCATGTTTGCGTGTCTTCGAGAGGAAGCGGAAGAGATTCCTGTGGTCGCCTTTTGAGATAGGCTTGTGGTTTGCATGACCGAGGAGCTGCACCGACCCCGTGCTGGCCGCTCTTTGGATTGAAGGGAGCTCTGC	215	3	25007834	25008048	-	-
zma-miR159f-3p	miRBase	miR159	3p	TTTGGATTGAAGGGAGCTCTG	21	zma-MIR159f	GGAGCTCCTCTCATTCCAATGAAGGGTCCTTCCGAAGGGTGGTTCCGCTGCTCGTTCATGGTTCCCACTATCCTATCTCATCCATGTTTGCGTGTCTTCGAGAGGAAGCGGAAGAGATTCCTGTGGTCGCCTTTTGAGATAGGCTTGTGGTTTGCATGACCGAGGAGCTGCACCGACCCCGTGCTGGCCGCTCTTTGGATTGAAGGGAGCTCTGC	215	3	25007834	25008048	-	-
zma-miR169a-5p	miRBase	miR169	5p	CAGCCAAGGATGACTTGCCGA	21	zma-MIR169a	TAGGCTCGGGGACTATGGTGCAGCCAAGGATGACTTGCCGATCGATGTGACGCCTCTTGATCTCGTCGTCGTCAGATCGTCGCCGATCATCGGCAAGTTGTTCTTGGCTACACCGTGGCTCCTGCTCCTG	130	3	37346686	37346815	+	-
zma-miR169a-3p	miRBase	miR169	3p	GGCAAGTTGTTCTTGGCTACA	21	zma-MIR169a	TAGGCTCGGGGACTATGGTGCAGCCAAGGATGACTTGCCGATCGATGTGACGCCTCTTGATCTCGTCGTCGTCAGATCGTCGCCGATCATCGGCAAGTTGTTCTTGGCTACACCGTGGCTCCTGCTCCTG	130	3	37346686	37346815	+	-
zma-miR408a	miRBase	miR408	3p	CTGCACTGCCTCTTCCCTGGC	21	zma-MIR408a	GGGGTTGGTTTTGATTTGGAGACAGGGATGAGACAGAGCATGGGATGGGGCCATCAACAAAGTGGAGGGACTAGCTTGCGAGGCAGAAAGAAGGTGCCAGTGCCGGTGCCTCCCCGGTGAAACGATGATGGGAGTGTTGTTGCTCCCTCCCCTGCACTGCCTCTTCCCTGGCTCCGATCCCCCACCGTTGC	191	3	58127890	58128080	-	-
zma-miR166l-3p	miRBase	miR166	3p	TCGGACCAGGCTTCATTCCTC	21	zma-MIR166l	AAAGAACGGGAGGAGGGTTTCTGGAATGGAGGCTGGTCCAAGATCCTTAGGTGTTAAAGCATTATATTGCCTTGTTTCTGGTTTTGTGTTTGAGATCTCGGACCAGGCTTCATTCCTCAAACCCACGCTCCCGACAC	137	3	91435335	91435471	+	-
zma-miR169m-5p	miRBase	miR169	5p	TAGCCAAGAATGGCTTGCCTA	21	zma-MIR169m	TTAGCCAAGAATGGCTTGCCTATCTCCATTATTTTGTTCATCGCAGGAAGCCCTTCCGTGATGGATGAAATGTGGATGATGGCATCCATTCTTGGCTAAGT	101	3	102365461	102365561	+	-
zma-miR169m-3p	miRBase	miR169	3p	GGCATCCATTCTTGGCTAAG	20	zma-MIR169m	TTAGCCAAGAATGGCTTGCCTATCTCCATTATTTTGTTCATCGCAGGAAGCCCTTCCGTGATGGATGAAATGTGGATGATGGCATCCATTCTTGGCTAAGT	101	3	102365461	102365561	+	-
zma-miR167a-5p	miRBase	miR167	5p	TGAAGCTGCCAGCATGATCTA	21	zma-MIR167a	TGCTCTTGCGAATGAGTGAAGCTGCCAGCATGATCTAGCTCTGATTTGGTTGGCACCATATTAGCAGGCGTCCACGCACAGCTAGACTAGAGTGGCCTCGCGCGCTCTCGTCTGGTCTGTGTCTCGCTTTGTGCCTGCAAATCGTTGTTAGATCATGCATGACAGCCTCATTCCTTCACAATTCTGGGGC	190	3	119392621	119392810	+	-
zma-miR167a-3p	miRBase	miR167	3p	GATCATGCATGACAGCCTCATT	22	zma-MIR167a	TGCTCTTGCGAATGAGTGAAGCTGCCAGCATGATCTAGCTCTGATTTGGTTGGCACCATATTAGCAGGCGTCCACGCACAGCTAGACTAGAGTGGCCTCGCGCGCTCTCGTCTGGTCTGTGTCTCGCTTTGTGCCTGCAAATCGTTGTTAGATCATGCATGACAGCCTCATTCCTTCACAATTCTGGGGC	190	3	119392621	119392810	+	-
zma-miR167g-5p	miRBase	miR167	5p	TGAAGCTGCCAGCATGATCTG	21	zma-MIR167g	AGTGGTGCACCACGAGTTGGTGAAGCTGCCAGCATGATCTGGTTATGATGGTGGTGGTATATGTAAGATGGATGTAATCTATACTACTACCGGCCCCTGTCACTCTCTCTCTCTCCCCCGTCCCTGACTGTCATATATGGATCGACGAATCCAAGATGAGAGGGGAAGGGAGAGAGAGAGAGGGTAATTAATGAGCACCAGGACCAGGTCATGCTGTAGTTTCATCTGCTGGTGGCCGCACAT	243	3	119394584	119394826	+	-
zma-miR167g-3p	miRBase	miR167	3p	GGTCATGCTGTAGTTTCATC	20	zma-MIR167g	AGTGGTGCACCACGAGTTGGTGAAGCTGCCAGCATGATCTGGTTATGATGGTGGTGGTATATGTAAGATGGATGTAATCTATACTACTACCGGCCCCTGTCACTCTCTCTCTCTCCCCCGTCCCTGACTGTCATATATGGATCGACGAATCCAAGATGAGAGGGGAAGGGAGAGAGAGAGAGGGTAATTAATGAGCACCAGGACCAGGTCATGCTGTAGTTTCATCTGCTGGTGGCCGCACAT	243	3	119394584	119394826	+	-
zma-miR172e	miRBase	miR172	3p	GGAATCTTGATGATGCTGCAT	21	zma-MIR172e	CAGCCAGCCGGTGATTTCTGGAGTGGCATCATCAAGATTCACACACTGCATGCCAACATAATGCGCGTGTTCATGCATCCATCGCCGCCGCTGCATCATGCATCATATATAATATATATATATGTGTATGTGTGGGAATCTTGATGATGCTGCATTGGATATCAAGGGCTATAT	174	3	145801592	145801765	+	-
zma-miR399d-3p	miRBase	miR399	3p	TGCCAAAGGAGAGCTGCCCTG	21	zma-MIR399d	TCAAGGTGAGAATCACAGTGTGGCTCTCCTCTGGCATGAAGGCGCGGCTGAGAGGCACGAACAGTTTCTGGCCTTCCCCTGCCAATGCCAAAGGAGAGCTGCCCTGCCATTCGTTAGCCCTGCAA	125	3	192096065	192096189	+	-
zma-miR167f-5p	miRBase	miR167	5p	TGAAGCTGCCAGCATGATCTG	21	zma-MIR167f	CGTGCACCTTATTAAGCAGCTGAAGCTGCCAGCATGATCTGATCTTTCGTTTACTGGCAACTTTGGATACCTAAGATCCAGATCGTGCTGCGCAGTTTCACCTGCTAATTGGAGCACAG	119	3	195044719	195044837	+	-
zma-miR11970-5p	miRBase	miR11970	5p	CAAGCGTGCAAGCAAACCATT	21	zma-MIR11970	AGACACCGATGGCTATGCAAGCAGTGGTTCTGTGCAAGCGTGCAAGCAAACCATTTGATCCATTAGATTACGATTCAACCACAGATACAACCATGGTTTGTTAGGAGCTATTTTATAAAGATTATTGAGCTAGTGGTGGAAGAGTTTAAGTGTTAAATGTGATTTACGGTTGGATCACGATCTAATGGATTAGATGGTTTGGTTGCACGTTTGCACAAAAGGACTGCTTGCATAGCGGTCGTTGCCT	247	3	208954641	208954887	-	-
zma-miR11970-3p	miRBase	miR11970	3p	TGGTTTGGTTGCACGTTTGCA	21	zma-MIR11970	AGACACCGATGGCTATGCAAGCAGTGGTTCTGTGCAAGCGTGCAAGCAAACCATTTGATCCATTAGATTACGATTCAACCACAGATACAACCATGGTTTGTTAGGAGCTATTTTATAAAGATTATTGAGCTAGTGGTGGAAGAGTTTAAGTGTTAAATGTGATTTACGGTTGGATCACGATCTAATGGATTAGATGGTTTGGTTGCACGTTTGCACAAAAGGACTGCTTGCATAGCGGTCGTTGCCT	247	3	208954641	208954887	-	-
zma-miR319a-5p	miRBase	miR319	5p	GAGCTCTCTTCAGTCCACTC	20	zma-MIR319a	GGTTCATGTTTTCTCTGGAAGAGAGCTCTCTTCAGTCCACTCTGAAATGGCTGTAGGGTTTCATTAGCTGCCGACTCATCCATTCACCTGCCAAGAACCATGGACAGGTCTGGTCTTGGTAGCCGAGTGGGTGGCGCGGGAGCTAAAATCAAGCTCTACGCTGTTTGTGGTTGGACTGAAGGGTGCTCCCTTTTGTTTGCTCAAACGCT	209	3	215788718	215788926	+	-
zma-miR319a-3p	miRBase	miR319	3p	TTGGACTGAAGGGTGCTCCC	20	zma-MIR319a	GGTTCATGTTTTCTCTGGAAGAGAGCTCTCTTCAGTCCACTCTGAAATGGCTGTAGGGTTTCATTAGCTGCCGACTCATCCATTCACCTGCCAAGAACCATGGACAGGTCTGGTCTTGGTAGCCGAGTGGGTGGCGCGGGAGCTAAAATCAAGCTCTACGCTGTTTGTGGTTGGACTGAAGGGTGCTCCCTTTTGTTTGCTCAAACGCT	209	3	215788718	215788926	+	-
zma-miR169n-5p	miRBase	miR169	5p	TAGCCAAGAATGGCTTGCCTA	21	zma-MIR169n	TTAGCCAAGAATGGCTTGCCTATCTCCACTGTTTGGTTCGTCTTGGGAGACCACCCTGATGATGGGTGTACTGTGTGGATGATGGCAGGCCTTCTTGGCTAAGC	104	3	233919759	233919862	+	-
zma-miR169n-3p	miRBase	miR169	3p	GGCAGGCCTTCTTGGCTAAG	20	zma-MIR169n	TTAGCCAAGAATGGCTTGCCTATCTCCACTGTTTGGTTCGTCTTGGGAGACCACCCTGATGATGGGTGTACTGTGTGGATGATGGCAGGCCTTCTTGGCTAAGC	104	3	233919759	233919862	+	-
zma-miR169o-5p	miRBase	miR169	5p	TAGCCAAGAATGACTTGCCTA	21	zma-MIR169o	GTAGCCAAGAATGACTTGCCTATGCACGCCCTCTGTTGGCAGTTCCGTCCGGCAGCCATGGCGACGGTTGCACAAGGTGAGTTTTTGCGGCGTGGATGATGCAATGTGGCTGCATCGGCAGGTCTTCTTGGCTAGCCA	138	4	13818178	13818315	+	-
zma-miR169o-3p	miRBase	miR169	3p	GGCAGGTCTTCTTGGCTAGC	20	zma-MIR169o	GTAGCCAAGAATGACTTGCCTATGCACGCCCTCTGTTGGCAGTTCCGTCCGGCAGCCATGGCGACGGTTGCACAAGGTGAGTTTTTGCGGCGTGGATGATGCAATGTGGCTGCATCGGCAGGTCTTCTTGGCTAGCCA	138	4	13818178	13818315	+	-
zma-miR2275a-5p	miRBase	miR2275	5p	AGAGTTGGAGGAAAGCAAACC	21	zma-MIR2275a	GTCAGGCACTGAAAGTGAGAGTTGGAGGAAAGCAAACCGGCTGGGTATCGGATTCAGCAACGGAGGGTGCTGCCGGTCGGTTTGTTTTCCTCCAATATCTCACCTTCAGTCGATAGTCTGAT	122	4	31733907	31734028	+	-
zma-miR2275a-3p	miRBase	miR2275	3p	TTTGTTTTCCTCCAATATCTCA	22	zma-MIR2275a	GTCAGGCACTGAAAGTGAGAGTTGGAGGAAAGCAAACCGGCTGGGTATCGGATTCAGCAACGGAGGGTGCTGCCGGTCGGTTTGTTTTCCTCCAATATCTCACCTTCAGTCGATAGTCTGAT	122	4	31733907	31734028	+	-
zma-miR2275b-5p	miRBase	miR2275	5p	AGGATTAGAGGCAACTGAACC	21	zma-MIR2275b	CCATCTGAAGTGAGGATTAGAGGCAACTGAACCATCATCTATTGCAAAGGTTCAGTTTCCTCTAATATCTCATCTCGAATGG	82	4	31734063	31734144	+	-
zma-miR2275b-3p	miRBase	miR2275	3p	TTCAGTTTCCTCTAATATCTCA	22	zma-MIR2275b	CCATCTGAAGTGAGGATTAGAGGCAACTGAACCATCATCTATTGCAAAGGTTCAGTTTCCTCTAATATCTCATCTCGAATGG	82	4	31734063	31734144	+	-
zma-miR169i-3p	miRBase	miR169	3p	GGCAGTCTCCTTGGCTAG	18	zma-MIR169i	GATGAGAGTGGTAGCTCTGGTAGCCAAGGATGACTTGCCTGTGTGCTGGCCACGCTCCCCTCATGCAAGGACCATCTCGTGTCGACCGACGAGCGAGCGAGCGATCGATCGATGAGAGGATGACGAAGCTTGGGGTGTACGTTGGTCTCTCACGGGCAGTCTCCTTGGCTAGCCCTGACTCACTCTTACCG	191	4	49299338	49299528	+	-
zma-miR156a-5p	miRBase	miR156	5p	TGACAGAAGAGAGTGAGCAC	20	zma-MIR156a	TTCGTTCCGTGGCTAACTGACAGAAGAGAGTGAGCACACAGCGGGCAGACTGCATCGATCGATCTGCATCCGAGACGGCGCACGTACGAATGATGATGCAGCTGCTGCTGCGTGCTCACTTCTCTCTCTGTCAGTCCTCTAGCTGCTACGGC	152	4	87069146	87069297	-	-
zma-miR156a-3p	miRBase	miR156	3p	GCTCACTTCTCTCTCTGTCAGT	22	zma-MIR156a	TTCGTTCCGTGGCTAACTGACAGAAGAGAGTGAGCACACAGCGGGCAGACTGCATCGATCGATCTGCATCCGAGACGGCGCACGTACGAATGATGATGCAGCTGCTGCTGCGTGCTCACTTCTCTCTCTGTCAGTCCTCTAGCTGCTACGGC	152	4	87069146	87069297	-	-
zma-miR156i-5p	miRBase	miR156	5p	TGACAGAAGAGAGTGAGCAC	20	zma-MIR156i	CGCGGCGGGCGGTGACAGAAGAGAGTGAGCACACGGCCGGGCGGAACGGCACCGGCGGATGGTGCCGTCGCGGACGCGTGCTCACTGCTCTATCTGTCATCCACTCTCTCCCCCGCT	117	4	140280587	140280703	-	-
zma-miR156i-3p	miRBase	miR156	3p	GCTCACTGCTCTATCTGTCATC	22	zma-MIR156i	CGCGGCGGGCGGTGACAGAAGAGAGTGAGCACACGGCCGGGCGGAACGGCACCGGCGGATGGTGCCGTCGCGGACGCGTGCTCACTGCTCTATCTGTCATCCACTCTCTCCCCCGCT	117	4	140280587	140280703	-	-
zma-miR166c-5p	miRBase	miR166	5p	GGAATGTTGTCTGGCTCGAGG	21	zma-MIR166c	GGGGAATGTTGTCTGGCTCGAGGTGCAGAAACACGCAGATCTCATCGAGGTCGTCTTGGTTGTTGTTGATCTCGGACCAGGCTTCATTCCCC	92	4	153858453	153858544	+	-
zma-miR166c-3p	miRBase	miR166	3p	TCGGACCAGGCTTCATTCCC	20	zma-MIR166c	GGGGAATGTTGTCTGGCTCGAGGTGCAGAAACACGCAGATCTCATCGAGGTCGTCTTGGTTGTTGTTGATCTCGGACCAGGCTTCATTCCCC	92	4	153858453	153858544	+	-
zma-miR394b-5p	miRBase	miR394	5p	TTGGCATTCTGTCCACCTCC	20	zma-MIR394b	TGGCGCTTACTGAGAGTTCCTTGGCATTCTGTCCACCTCCCTTCTTGACGATCTTGCAGAAAGTTTGCTTTTTTTGTTTGTTTGGAGGTGGGCATACTGCCAATGGAGCTGCGTAGGCCTCC	122	4	157728375	157728496	+	-
zma-miR394b-3p	miRBase	miR394	3p	AGGTGGGCATACTGCCAATG	20	zma-MIR394b	TGGCGCTTACTGAGAGTTCCTTGGCATTCTGTCCACCTCCCTTCTTGACGATCTTGCAGAAAGTTTGCTTTTTTTGTTTGTTTGGAGGTGGGCATACTGCCAATGGAGCTGCGTAGGCCTCC	122	4	157728375	157728496	+	-
zma-miR399b-3p	miRBase	miR399	3p	TGCCAAAGGAGAGCTGTCCTG	21	zma-MIR399b	GTAGCTCAGGGTGCGAATCACAGTGCAGCTCTCCTCTGGCATGAAGGCTGTGAGAGAGGCATGACAATTTCTGGCCTTGCCCTGCCAAAGGAGAGCTGTCCTGCCATTCATTAGCCCTGCAA	122	4	158285681	158285802	+	-
zma-miR172c-5p	miRBase	miR172	5p	CAGCACCACCAAGATTCACA	20	zma-MIR172c	GTGCAGCACCACCAAGATTCACATCCAACTCTCACGCATCTTCAGTGATGCATGCATGCTCTGTGATGTCTCGCAGCAGCTATATGCATATGTGATGAGATGAGAATCTTGATGATGCTGCAT	123	4	174154928	174155050	+	-
zma-miR172c-3p	miRBase	miR172	3p	AGAATCTTGATGATGCTGCA	20	zma-MIR172c	GTGCAGCACCACCAAGATTCACATCCAACTCTCACGCATCTTCAGTGATGCATGCATGCTCTGTGATGTCTCGCAGCAGCTATATGCATATGTGATGAGATGAGAATCTTGATGATGCTGCAT	123	4	174154928	174155050	+	-
zma-miR396a-5p	miRBase	miR396	5p	TTCCACAGCTTTCTTGAACTG	21	zma-MIR396a	ACATGGCCCTCCTTGCCGTCTTCCACAGCTTTCTTGAACTGCATGCCGCCGGCTGGTGGATGCTGCGCGCTTGAATTCCGGTCGATCCCAAGAGGCGCAGTTCAATAAAGCTGTGGGAAACTGCAGAGAGAGGCCAC	137	4	176326883	176327019	+	-
zma-miR396a-3p	miRBase	miR396	3p	GTTCAATAAAGCTGTGGGAAA	21	zma-MIR396a	ACATGGCCCTCCTTGCCGTCTTCCACAGCTTTCTTGAACTGCATGCCGCCGGCTGGTGGATGCTGCGCGCTTGAATTCCGGTCGATCCCAAGAGGCGCAGTTCAATAAAGCTGTGGGAAACTGCAGAGAGAGGCCAC	137	4	176326883	176327019	+	-
zma-miR396e-5p	miRBase	miR396	5p	TTCCACAGCTTTCTTGAACTT	21	zma-MIR396e	TTTCCACAGCTTTCTTGAACTTCTTCTTCTTCTCTCTCTTAGAAGGGCCGTATAGCTTCTTTGAACCTCTCTCTCTCTCTCTCTCAAAAGTGTACACGAACACTTTCTTCATTCTCTGCCTCTCGCTCTCTGATCTCCGAAGAAGGTCAAGAAAGCCGTGGGAAGA	166	4	176331864	176332029	-	-
zma-miR164f-5p	miRBase	miR164	5p	TGGAGAAGCAGGGCACGTGCT	21	zma-MIR164f	CTGGAGAAGCAGGGCACGTGCTCGCCGACAAGTCGAAGCCTTAGGGCAGCTTGGCCTGTGGCTGCACGCGTACGTGGTCGTCGCAGCACGTGCGCTCCTTCTCCAACA	108	4	179535508	179535615	+	-
zma-miR166n-5p	miRBase	miR166	5p	GGATTGTTGTCTGGCTCGGTG	21	zma-MIR166n	GGGATTGTTGTCTGGCTCGGTGTCTCCGGTCGAGACGGCCTTGCCGGCGCCGGAGCTGTCGTCGACCGGAGATCTCGGACCAGGCTTCAATCCCTT	96	4	181112182	181112277	+	-
zma-miR166n-3p	miRBase	miR166	3p	TCGGACCAGGCTTCAATCCCT	21	zma-MIR166n	GGGATTGTTGTCTGGCTCGGTGTCTCCGGTCGAGACGGCCTTGCCGGCGCCGGAGCTGTCGTCGACCGGAGATCTCGGACCAGGCTTCAATCCCTT	96	4	181112182	181112277	+	-
zma-miR399a-5p	miRBase	miR399	5p	GTGCGGTTCTCCTCTGGCACG	21	zma-MIR399a	TGTGAAGAGGGTGAGAATCACAGTGCGGTTCTCCTCTGGCACGAAGGCTGGCCAGAGCAGCTTATATTGCCACCACCCTTCCTTGCCAAAGGAGAATTGCCCTGCCATTCACAACCCTGCAAT	123	4	233617206	233617328	-	-
zma-miR399a-3p	miRBase	miR399	3p	TGCCAAAGGAGAATTGCCCTG	21	zma-MIR399a	TGTGAAGAGGGTGAGAATCACAGTGCGGTTCTCCTCTGGCACGAAGGCTGGCCAGAGCAGCTTATATTGCCACCACCCTTCCTTGCCAAAGGAGAATTGCCCTGCCATTCACAACCCTGCAAT	123	4	233617206	233617328	-	-
zma-miR399g-5p	miRBase	miR399	5p	GGGCAACCCCCCGTTGGCAGG	21	zma-MIR399g	AGGGCAACCCCCCGTTGGCAGGTGCGACGGCGACGTACCCCTACCCTGCCAAAGGGGATTTGCCCGGC	68	4	233618406	233618473	+	-
zma-miR399g-3p	miRBase	miR399	3p	TGCCAAAGGGGATTTGCCCGG	21	zma-MIR399g	AGGGCAACCCCCCGTTGGCAGGTGCGACGGCGACGTACCCCTACCCTGCCAAAGGGGATTTGCCCGGC	68	4	233618406	233618473	+	-
zma-miR171a-5p	miRBase	miR171	5p	TATTGGCGAGGTTCAATCAGA	21	zma-MIR171a	GATATTGGCGAGGTTCAATCAGATGATGTATTTTTCTTATATATAAATTTGCATGCATGAAGGTGTGAATCCAGTGTCTGATTGAGCCGCGCCAATATC	99	4	239713555	239713653	+	-
zma-miR171a-3p	miRBase	miR171	3p	TGATTGAGCCGCGCCAATAT	20	zma-MIR171a	GATATTGGCGAGGTTCAATCAGATGATGTATTTTTCTTATATATAAATTTGCATGCATGAAGGTGTGAATCCAGTGTCTGATTGAGCCGCGCCAATATC	99	4	239713555	239713653	+	-
zma-miR160a-5p	miRBase	miR160	5p	TGCCTGGCTCCCTGTATGCCA	21	zma-MIR160a	TTGTGTGCGTGCCTGGCTCCCTGTATGCCACACATGTAGCGCCCAACCCAGATGCTAAGGTTGCCTGCTGTGGGTGGCGTGCAAGGGGCCAAGCATGCATCCAT	104	4	241638522	241638625	+	-
zma-miR160a-3p	miRBase	miR160	3p	GCGTGCAAGGGGCCAAGCATG	21	zma-MIR160a	TTGTGTGCGTGCCTGGCTCCCTGTATGCCACACATGTAGCGCCCAACCCAGATGCTAAGGTTGCCTGCTGTGGGTGGCGTGCAAGGGGCCAAGCATGCATCCAT	104	4	241638522	241638625	+	-
zma-miR168b-5p	miRBase	miR168	5p	TCGCTTGGTGCAGATCGGGAC	21	zma-MIR168b	TCCGCCGCGCCGTCTCGGGCTCGCTTGGTGCAGATCGGGACCCGCCGCCCGGCCGACGGGACGGATCCCGCCTTGCATCAAGTGAATCGGAGCCGGCGCAGCGA	104	4	244520636	244520739	-	-
zma-miR168b-3p	miRBase	miR168	3p	CCCGCCTTGCATCAAGTGAA	20	zma-MIR168b	TCCGCCGCGCCGTCTCGGGCTCGCTTGGTGCAGATCGGGACCCGCCGCCCGGCCGACGGGACGGATCCCGCCTTGCATCAAGTGAATCGGAGCCGGCGCAGCGA	104	4	244520636	244520739	-	-
zma-miR390b-5p	miRBase	miR390	5p	AAGCTCAGGAGGGATAGCGCC	21	zma-MIR390b	GAAGCTCAGGAGGGATAGCGCCTAGGAAATCACACATAGATTGGAGCCACGAAGAGGAAGGGAGAATGAGAGAGAGAGAGACAGAGCAGCTATGCTGCTCTGTCTCTCTCTCTCACTTTCTCTTGGATCCATCTCAAGGTTCTGTCTATATATGATGAATCGATCCGAAGCGCTATCTATCCTGAGCTCCAC	192	5	2846327	2846518	+	-
zma-miR390b-3p	miRBase	miR390	3p	CGCTATCTATCCTGAGCTCCA	21	zma-MIR390b	GAAGCTCAGGAGGGATAGCGCCTAGGAAATCACACATAGATTGGAGCCACGAAGAGGAAGGGAGAATGAGAGAGAGAGAGACAGAGCAGCTATGCTGCTCTGTCTCTCTCTCTCACTTTCTCTTGGATCCATCTCAAGGTTCTGTCTATATATGATGAATCGATCCGAAGCGCTATCTATCCTGAGCTCCAC	192	5	2846327	2846518	+	-
zma-miR167c-5p	miRBase	miR167	5p	TGAAGCTGCCAGCATGATCTA	21	zma-MIR167c	TGCCCAAGGGAACGAGTGAAGCTGCCAGCATGATCTAGCTCGGAGTGATCACGCGAGGAGAACAATAGCTCGAGGTGGTCATGCCTTGCTAGATCATGCTGTGGCAGCCTCACTTCTTCCCGTCCTTGGGCA	132	5	4414244	4414375	+	-
zma-miR167c-3p	miRBase	miR167	3p	GATCATGCTGTGGCAGCCTCACT	23	zma-MIR167c	TGCCCAAGGGAACGAGTGAAGCTGCCAGCATGATCTAGCTCGGAGTGATCACGCGAGGAGAACAATAGCTCGAGGTGGTCATGCCTTGCTAGATCATGCTGTGGCAGCCTCACTTCTTCCCGTCCTTGGGCA	132	5	4414244	4414375	+	-
zma-miR167b-5p	miRBase	miR167	5p	TGAAGCTGCCAGCATGATCTA	21	zma-MIR167b	AGTGCCCAAGATAAAGGGTGAAGCTGCCAGCATGATCTAACGACGGCATTGCTCTGCTGCTGCAGTGAGGCTTGCGAGTGATGGTTAGATCATGCTGTGACAGTTTCACTCTTTCCCTTTGGGCACA	127	5	7976369	7976495	+	-
zma-miR167b-3p	miRBase	miR167	3p	GATCATGCTGTGACAGTTTCACT	23	zma-MIR167b	AGTGCCCAAGATAAAGGGTGAAGCTGCCAGCATGATCTAACGACGGCATTGCTCTGCTGCTGCAGTGAGGCTTGCGAGTGATGGTTAGATCATGCTGTGACAGTTTCACTCTTTCCCTTTGGGCACA	127	5	7976369	7976495	+	-
zma-miR166f	miRBase	miR166	3p	TCGGACCAGGCTTCATTCCC	20	zma-MIR166f	GGGGAATGACGTCCGGTCCGAACAAGCCACGGCTGCTGCTGCGCTACCGCCGCGGCTTCGGACCAGGCTTCATTCCCC	78	5	8289186	8289263	+	-
zma-miR171f-5p	miRBase	miR171	5p	CGATGTTGGCATGGCTCAATC	21	zma-MIR171f	TTGGTTGTTGGCTGAGAGAGTGCGATGTTGGCATGGCTCAATCAACTCGCCGGCCGCGGGTGGCTTATAGCTTAATTCTGCGCATTCGATCGAGGTGCGGGCGCAGTGTTTAATTGATTGAGCCGTGCCAATATCACAACCTTCTCTAGCCTATA	155	5	8896283	8896437	-	-
zma-miR171f-3p	miRBase	miR171	3p	TTGAGCCGTGCCAATATCACA	21	zma-MIR171f	TTGGTTGTTGGCTGAGAGAGTGCGATGTTGGCATGGCTCAATCAACTCGCCGGCCGCGGGTGGCTTATAGCTTAATTCTGCGCATTCGATCGAGGTGCGGGCGCAGTGTTTAATTGATTGAGCCGTGCCAATATCACAACCTTCTCTAGCCTATA	155	5	8896283	8896437	-	-
zma-miR171m-5p	miRBase	miR171	5p	TATTGGCGCGCCTCAATCCGA	21	zma-MIR171m	GTATTGGCGCGCCTCAATCCGAAGGCGTGGCTGATAGATTGGCGCGGCAGCCATGTTCTTGGATTGAGCCGCGTCAATATCT	82	5	20785928	20786009	-	-
zma-miR171m-3p	miRBase	miR171	3p	GGATTGAGCCGCGTCAATATC	21	zma-MIR171m	GTATTGGCGCGCCTCAATCCGAAGGCGTGGCTGATAGATTGGCGCGGCAGCCATGTTCTTGGATTGAGCCGCGTCAATATCT	82	5	20785928	20786009	-	-
zma-miR166d-5p	miRBase	miR166	5p	GGAATGTTGTCTGGTTCAAGG	21	zma-MIR166d	GTGGAATGTTGTCTGGTTCAAGGTCTTTTGCTTTGTGATCCATCTGTGTAGAGCTTCTAAGTATTCCTTGGATCTGCAAGATCTCGGACCAGGCTTCATTCCCC	104	5	22443534	22443637	-	-
zma-miR166d-3p	miRBase	miR166	3p	TCGGACCAGGCTTCATTCCC	20	zma-MIR166d	GTGGAATGTTGTCTGGTTCAAGGTCTTTTGCTTTGTGATCCATCTGTGTAGAGCTTCTAAGTATTCCTTGGATCTGCAAGATCTCGGACCAGGCTTCATTCCCC	104	5	22443534	22443637	-	-
zma-miR160b-5p	miRBase	miR160	5p	TGCCTGGCTCCCTGTATGCCA	21	zma-MIR160b	CGATCGGCTCGTGTCGTGTGTGCCTGGCTCCCTGTATGCCACACATGTAGCCAACCCGTGGCGTGATTGGATGCTGTGGGTGGCGTGCAAGGAGCCAAGCATGCATAACAGGCCATGATCA	121	5	44296768	44296888	-	-
zma-miR160b-3p	miRBase	miR160	3p	GCGTGCAAGGAGCCAAGCATG	21	zma-MIR160b	CGATCGGCTCGTGTCGTGTGTGCCTGGCTCCCTGTATGCCACACATGTAGCCAACCCGTGGCGTGATTGGATGCTGTGGGTGGCGTGCAAGGAGCCAAGCATGCATAACAGGCCATGATCA	121	5	44296768	44296888	-	-
zma-miR168a-5p	miRBase	miR168	5p	TCGCTTGGTGCAGATCGGGAC	21	zma-MIR168a	GAAGCCGCGCCGCCTCGGGCTCGCTTGGTGCAGATCGGGACCCGCCGCCCGGCCGACGGGACGGATCCCGCCTTGCACCAAGTGAATCGGAGCCGGCGGAGCGA	104	5	76534928	76535031	-	-
zma-miR168a-3p	miRBase	miR168	3p	CCCGCCTTGCACCAAGTGAA	20	zma-MIR168a	GAAGCCGCGCCGCCTCGGGCTCGCTTGGTGCAGATCGGGACCCGCCGCCCGGCCGACGGGACGGATCCCGCCTTGCACCAAGTGAATCGGAGCCGGCGGAGCGA	104	5	76534928	76535031	-	-
zma-miR397b-5p	miRBase	miR397	5p	TCATTGAGCGCAGCGTTGATG	21	zma-MIR397b	ATCATTGAGCGCAGCGTTGATGAGCCAGCCGCCGTGCCTCCCCTGTCGGCTGCGGCGGCTCACCAGCGCTGCACTCAATTACGC	84	5	84610591	84610674	-	-
zma-miR397b-3p	miRBase	miR397	3p	CCAGCGCTGCACTCAATTACG	21	zma-MIR397b	ATCATTGAGCGCAGCGTTGATGAGCCAGCCGCCGTGCCTCCCCTGTCGGCTGCGGCGGCTCACCAGCGCTGCACTCAATTACGC	84	5	84610591	84610674	-	-
zma-miR156d-5p	miRBase	miR156	5p	TGACAGAAGAGAGTGAGCAC	20	zma-MIR156d	AGGCTCTCGAGAGATTGACAGAAGAGAGTGAGCACACGGCGCGACGAACGACATAGCATGTATGCCGTCCTCGCCGCGTGCTCACTTCTCTTTCTGTCAGCCTCTTTCTCTCGATGGCT	119	5	94725847	94725965	-	-
zma-miR156d-3p	miRBase	miR156	3p	GCTCACTTCTCTTTCTGTCAGC	22	zma-MIR156d	AGGCTCTCGAGAGATTGACAGAAGAGAGTGAGCACACGGCGCGACGAACGACATAGCATGTATGCCGTCCTCGCCGCGTGCTCACTTCTCTTTCTGTCAGCCTCTTTCTCTCGATGGCT	119	5	94725847	94725965	-	-
zma-miR399h-5p	miRBase	miR399	5p	GTGCAGTTCTCCTCTGGCACG	21	zma-MIR399h	AGTGCAGTTCTCCTCTGGCACGAACCAAGGCTGAGCAGCTTGCCCCATGGCTAGCCCACGACGGCCCTTCCTTGCCAAAGGAGAATTGCCCTGC	94	5	150363095	150363188	+	-
zma-miR399h-3p	miRBase	miR399	3p	TGCCAAAGGAGAATTGCCCTG	21	zma-MIR399h	AGTGCAGTTCTCCTCTGGCACGAACCAAGGCTGAGCAGCTTGCCCCATGGCTAGCCCACGACGGCCCTTCCTTGCCAAAGGAGAATTGCCCTGC	94	5	150363095	150363188	+	-
zma-miR399i-5p	miRBase	miR399	5p	GTGCGGCTCTCCTCTGGCATG	21	zma-MIR399i	AGTGCGGCTCTCCTCTGGCATGAGGGCGCGACTGAGAGGCACGAACAGTTTCTGGCCTTCTCCTGCCAATGCCAAAGGAGAGTTGCCCTGC	91	5	150372041	150372131	+	-
zma-miR399i-3p	miRBase	miR399	3p	TGCCAAAGGAGAGTTGCCCTG	21	zma-MIR399i	AGTGCGGCTCTCCTCTGGCATGAGGGCGCGACTGAGAGGCACGAACAGTTTCTGGCCTTCTCCTGCCAATGCCAAAGGAGAGTTGCCCTGC	91	5	150372041	150372131	+	-
zma-miR529-5p	miRBase	miR529	5p	AGAAGAGAGAGAGTACAGCCT	21	zma-MIR529	GAGAAGAGAGAGAGTACAGCCTTGTTGCCATGTACACACTCAGATATCAACAGTCTCTTATATTTGCTGTTACTACCTGTTATTAGTGTCCAGTGATGATGAAGGCTGTACCCTCTCTCTTCTTCT	126	5	164370906	164371031	+	-
zma-miR529-3p	miRBase	miR529	3p	GCTGTACCCTCTCTCTTCTTC	21	zma-MIR529	GAGAAGAGAGAGAGTACAGCCTTGTTGCCATGTACACACTCAGATATCAACAGTCTCTTATATTTGCTGTTACTACCTGTTATTAGTGTCCAGTGATGATGAAGGCTGTACCCTCTCTCTTCTTCT	126	5	164370906	164371031	+	-
zma-miR169f-5p	miRBase	miR169	5p	TAGCCAAGGATGACTTGCCTA	21	zma-MIR169f	ACCAGAGCTGATTCGTTCAGTAGCCAAGGATGACTTGCCTAGGTATATATGCATGGGCTATGGCTACATGCCTGAGAGCCAGTCTCTTGTGACGCTGAGCATGTATAGTGTAGGCATGTCTTCCTTGGCTACTCGGAGCGGCTCTAGTCA	150	5	168617435	168617584	+	-
zma-miR169f-3p	miRBase	miR169	3p	GGCATGTCTTCCTTGGCTACT	21	zma-MIR169f	ACCAGAGCTGATTCGTTCAGTAGCCAAGGATGACTTGCCTAGGTATATATGCATGGGCTATGGCTACATGCCTGAGAGCCAGTCTCTTGTGACGCTGAGCATGTATAGTGTAGGCATGTCTTCCTTGGCTACTCGGAGCGGCTCTAGTCA	150	5	168617435	168617584	+	-
zma-miR827-5p	miRBase	miR827	5p	TTTGTTGGTGGTCATTTAACC	21	zma-MIR827	GTTTTGTTGGTGGTCATTTAACCATGCATGCTTCGATCGATGGATTGGTGCATGCATGGATTATTGCATAGTGTGATGCATGTGGCGCATCAGTGCATGGTTAGATGACCATCAGCAAACAT	122	5	171268609	171268730	-	-
zma-miR827-3p	miRBase	miR827	3p	TTAGATGACCATCAGCAAACA	21	zma-MIR827	GTTTTGTTGGTGGTCATTTAACCATGCATGCTTCGATCGATGGATTGGTGCATGCATGGATTATTGCATAGTGTGATGCATGTGGCGCATCAGTGCATGGTTAGATGACCATCAGCAAACAT	122	5	171268609	171268730	-	-
zma-miR162-5p	miRBase	miR162	5p	GGGCGCAGTGGTTTATCGATC	21	zma-MIR162	CTGGGCGCAGTGGTTTATCGATCTCTTCCTTGCCTTGTGCTGGTCCGGCCGGGAGTGGTGGTTCAAGCGTTTTATTGTTGCAGCAGCTCGCAAACAACGCGGGAATCGGTCGATAAACCTCTGCATCCAG	130	5	186614119	186614248	+	-
zma-miR162-3p	miRBase	miR162	3p	TCGATAAACCTCTGCATCCA	20	zma-MIR162	CTGGGCGCAGTGGTTTATCGATCTCTTCCTTGCCTTGTGCTGGTCCGGCCGGGAGTGGTGGTTCAAGCGTTTTATTGTTGCAGCAGCTCGCAAACAACGCGGGAATCGGTCGATAAACCTCTGCATCCAG	130	5	186614119	186614248	+	-
zma-miR156l-5p	miRBase	miR156	5p	TGACAGAAGAGAGTGAGCAC	20	zma-MIR156l	GTGACAGAAGAGAGTGAGCACACGGCCGGGCGGAACGGCACCGGCGGATGTGCCGTCGCGGCCGCGTGCTCACTGCTCTATCTGTCACCC	90	5	188595332	188595421	-	-
zma-miR156l-3p	miRBase	miR156	3p	GCTCACTGCTCTATCTGTCACC	22	zma-MIR156l	GTGACAGAAGAGAGTGAGCACACGGCCGGGCGGAACGGCACCGGCGGATGTGCCGTCGCGGCCGCGTGCTCACTGCTCTATCTGTCACCC	90	5	188595332	188595421	-	-
zma-miR166e	miRBase	miR166	3p	TCGGACCAGGCTTCATTCCC	20	zma-MIR166e	GGGGAATGTTGTCTGGCTCGAGGTGCAGAAACATACAGATCTCATCGGTCTAGGTTCTTGTCGATCTCGGACCAGGCTTCATTCCCC	87	5	195602244	195602330	+	-
zma-miR394a-5p	miRBase	miR394	5p	TTGGCATTCTGTCCACCTCC	20	zma-MIR394a	GGCGCTTACTGAAGAGTTCCTTGGCATTCTGTCCACCTCCTCTCGCCGATCTTGCAGAAAGTTTACCAGTTCTGTTGCATTTTTTTTGGAGGTGGGCATACTGCCAATGGAGCTGTGTAGGCCTCC	126	5	199240964	199241089	+	-
zma-miR394a-3p	miRBase	miR394	3p	AGGTGGGCATACTGCCAATG	20	zma-MIR394a	GGCGCTTACTGAAGAGTTCCTTGGCATTCTGTCCACCTCCTCTCGCCGATCTTGCAGAAAGTTTACCAGTTCTGTTGCATTTTTTTTGGAGGTGGGCATACTGCCAATGGAGCTGTGTAGGCCTCC	126	5	199240964	199241089	+	-
zma-miR166k-5p	miRBase	miR166	5p	GGATTGTTGTCTGGCTCGGGG	21	zma-MIR166k	GCATGCTCGGGTTAGGTCAGGGGGATTGTTGTCTGGCTCGGGGTCTCCGGTCGAGATCGATTCATAACATATACGTACGTGCTTCTAGCCTTGCCGGCGGAGCTAGTCGTTGTCGTCGACCGGAGATTTCGGACCAGGCTTCAATCCCTTTGACCATGCGGCATTAGG	168	5	216483766	216483933	-	-
zma-miR166k-3p	miRBase	miR166	3p	TCGGACCAGGCTTCAATCCCT	21	zma-MIR166k	GCATGCTCGGGTTAGGTCAGGGGGATTGTTGTCTGGCTCGGGGTCTCCGGTCGAGATCGATTCATAACATATACGTACGTGCTTCTAGCCTTGCCGGCGGAGCTAGTCGTTGTCGTCGACCGGAGATTTCGGACCAGGCTTCAATCCCTTTGACCATGCGGCATTAGG	168	5	216483766	216483933	-	-
zma-miR166m-5p	miRBase	miR166	5p	GGAATGTTGGCTGGCTCGAGG	21	zma-MIR166m	TCCTTGGTCTGGGGGTTTGTGGGGAATGTTGGCTGGCTCGAGGCATCCGCGTCCTGGCTCGCAGTCGCAGCGCAGATCGTGTTTTGCCTGCTACCGGCCGGACAGATCGAGAGGCGTCGGACCAGGCTTCATTCCTCGCAAACCGGTGCATCCCCA	156	5	216484037	216484192	-	-
zma-miR166m-3p	miRBase	miR166	3p	TCGGACCAGGCTTCATTCCTC	21	zma-MIR166m	TCCTTGGTCTGGGGGTTTGTGGGGAATGTTGGCTGGCTCGAGGCATCCGCGTCCTGGCTCGCAGTCGCAGCGCAGATCGTGTTTTGCCTGCTACCGGCCGGACAGATCGAGAGGCGTCGGACCAGGCTTCATTCCTCGCAAACCGGTGCATCCCCA	156	5	216484037	216484192	-	-
zma-miR396f-5p	miRBase	miR396	5p	TTCCACAGCTTTCTTGAACTT	21	zma-MIR396f	TTTCCACAGCTTTCTTGAACTTCTTCTTCTTCTTCTCTCTTGGAACGGCAGCTTTCTTCGAATCTGTCTCTCTCTCTCTCATCTCCGAAGACGAAGGTCAAGAAAGCTGTGGGAAGA	117	5	220211653	220211769	+	-
zma-miR396f-3p	miRBase	miR396	3p	GGTCAAGAAAGCTGTGGGAAG	21	zma-MIR396f	TTTCCACAGCTTTCTTGAACTTCTTCTTCTTCTTCTCTCTTGGAACGGCAGCTTTCTTCGAATCTGTCTCTCTCTCTCTCATCTCCGAAGACGAAGGTCAAGAAAGCTGTGGGAAGA	117	5	220211653	220211769	+	-
zma-miR172b-5p	miRBase	miR172	5p	CAGCACCATCAAGATTCACA	20	zma-MIR172b	GTGCAGCACCATCAAGATTCACATCGTCCAACTCATGCATCATGCATATATGCATCTTCAATGATGCGTGCCTCGCATGTGTGTGTATATATATATGATGAGATGAGAATCTTGATGATGCTGCAT	126	5	221721349	221721474	-	-
zma-miR172b-3p	miRBase	miR172	3p	AGAATCTTGATGATGCTGCA	20	zma-MIR172b	GTGCAGCACCATCAAGATTCACATCGTCCAACTCATGCATCATGCATATATGCATCTTCAATGATGCGTGCCTCGCATGTGTGTGTATATATATATGATGAGATGAGAATCTTGATGATGCTGCAT	126	5	221721349	221721474	-	-
zma-miR171b-5p.5_223360741	miRBase	miR171	5p	GATATTGGCGCGGTTCAATC	20	zma-MIR171b	CGGGATATTGGCGCGGTTCAATCAGAAAGCTTGCGCTCCAGGCCCGAGGGGCTCCACTCTTTGATTGAGCCGTGCCAATATCACG	85	5	223360741	223360825	-	-
zma-miR171b-3p.5_223360741	miRBase	miR171	3p	TTGAGCCGTGCCAATATCAC	20	zma-MIR171b	CGGGATATTGGCGCGGTTCAATCAGAAAGCTTGCGCTCCAGGCCCGAGGGGCTCCACTCTTTGATTGAGCCGTGCCAATATCACG	85	5	223360741	223360825	-	-
zma-miR160c-5p	miRBase	miR160	5p	TGCCTGGCTCCCTGTATGCCA	21	zma-MIR160c	AGGATGTGCCTGGCTCCCTGTATGCCACTCATCTAGAGCAACGACAGCTTGGTAGGGTTGCCTATAAGATGGATGGCGTGCATGGTGCCAAGCATATCTC	100	6	9551862	9551961	+	-
zma-miR160c-3p	miRBase	miR160	3p	GCGTGCATGGTGCCAAGCATA	21	zma-MIR160c	AGGATGTGCCTGGCTCCCTGTATGCCACTCATCTAGAGCAACGACAGCTTGGTAGGGTTGCCTATAAGATGGATGGCGTGCATGGTGCCAAGCATATCTC	100	6	9551862	9551961	+	-
zma-miR166a-5p	miRBase	miR166	5p	GGAATGTTGTCTGGCTCGGGG	21	zma-MIR166a	TGAGGGGAATGTTGTCTGGCTCGGGGCCGCCGCCGCCGCTCCTTCCTTCTCTAGTCTCTCTTCTCTCCTAGCAGCTACTCTTCGCTTCCTACTCCTATCTCGATCCCTCTCTTCTTCTTCTTCTTCTTCTTCCTCTTCCCCCCTCTCTTGGATCGAGACCGAGCGGACGGAGACGAGTGGTGTAGATCTCGGACCAGGCTTCATTCCCCCCAA	213	6	87381728	87381940	+	-
zma-miR166a-3p	miRBase	miR166	3p	TCGGACCAGGCTTCATTCCCC	21	zma-MIR166a	TGAGGGGAATGTTGTCTGGCTCGGGGCCGCCGCCGCCGCTCCTTCCTTCTCTAGTCTCTCTTCTCTCCTAGCAGCTACTCTTCGCTTCCTACTCCTATCTCGATCCCTCTCTTCTTCTTCTTCTTCTTCTTCCTCTTCCCCCCTCTCTTGGATCGAGACCGAGCGGACGGAGACGAGTGGTGTAGATCTCGGACCAGGCTTCATTCCCCCCAA	213	6	87381728	87381940	+	-
zma-miR160g-5p	miRBase	miR160	5p	TGCCTGGCTCCCTGTATGCCA	21	zma-MIR160g	ATGCCTGGCTCCCTGTATGCCACACATGTAGCCCAACCCGTGATGTGATTGGATGCTGTGGGTGGCGTGCAAGGAGCCAAGCATGT	86	6	94036699	94036784	+	-
zma-miR160g-3p	miRBase	miR160	3p	GCGTGCAAGGAGCCAAGCATG	21	zma-MIR160g	ATGCCTGGCTCCCTGTATGCCACACATGTAGCCCAACCCGTGATGTGATTGGATGCTGTGGGTGGCGTGCAAGGAGCCAAGCATGT	86	6	94036699	94036784	+	-
zma-miR167h-5p	miRBase	miR167	5p	TGAAGCTGCCAGCATGATCTG	21	zma-MIR167h	ACTTTGCTGCTGTGAGAGGTTGAAGCTGCCAGCATGATCTGGCTGCTCAGACGCCGGCGGGCGTCTCGAGTGCTCGCTCGATCGTCGGTGACGCTTGGATTCACCAGATCATGTTGCAGCTTCACTCTCTCGCAGCCAGCAAA	143	6	95985872	95986014	-	-
zma-miR167h-3p	miRBase	miR167	3p	GATCATGTTGCAGCTTCAC	19	zma-MIR167h	ACTTTGCTGCTGTGAGAGGTTGAAGCTGCCAGCATGATCTGGCTGCTCAGACGCCGGCGGGCGTCTCGAGTGCTCGCTCGATCGTCGGTGACGCTTGGATTCACCAGATCATGTTGCAGCTTCACTCTCTCGCAGCCAGCAAA	143	6	95985872	95986014	-	-
zma-miR156k-5p	miRBase	miR156	5p	TGACAGAAGAGAGCGAGCAC	20	zma-MIR156k	GGCTTAGGCCCCGAAGAGATTGACAGAAGAGAGCGAGCACCTGGCGCGGCGACCGGCATGGAACGCATGCCGTCCCCGCCGCGTGCTCGCTTCTCTTTCTGTCAGCCTCTCCCTCGTCCTGAG	123	6	98967260	98967382	-	-
zma-miR156k-3p	miRBase	miR156	3p	GCTCGCTTCTCTTTCTGTCAGC	22	zma-MIR156k	GGCTTAGGCCCCGAAGAGATTGACAGAAGAGAGCGAGCACCTGGCGCGGCGACCGGCATGGAACGCATGCCGTCCCCGCCGCGTGCTCGCTTCTCTTTCTGTCAGCCTCTCCCTCGTCCTGAG	123	6	98967260	98967382	-	-
zma-miR164g-5p	miRBase	miR164	5p	TGGAGAAGCAGGGCACGTGCA	21	zma-MIR164g	TTGGAGAAGCAGGGCACGTGCAGAGACACGCCGGAGCACGGCCGCCGCCGATCTACCGACCTCCCAAACCTGCCTTATGGTGTGGGGGTGGAGGTCGTCGGTGGAAGCGATAGCTGTCGTTGTTGCTTCGATGTTGTTAGCTCCTCCTGCACGTGCTCCCCTTCTCCACCA	171	6	142646355	142646525	-	-
zma-miR164g-3p	miRBase	miR164	3p	CACGTGCTCCCCTTCTCCACC	21	zma-MIR164g	TTGGAGAAGCAGGGCACGTGCAGAGACACGCCGGAGCACGGCCGCCGCCGATCTACCGACCTCCCAAACCTGCCTTATGGTGTGGGGGTGGAGGTCGTCGGTGGAAGCGATAGCTGTCGTTGTTGCTTCGATGTTGTTAGCTCCTCCTGCACGTGCTCCCCTTCTCCACCA	171	6	142646355	142646525	-	-
zma-miR164b-5p	miRBase	miR164	5p	TGGAGAAGCAGGGCACGTGCA	21	zma-MIR164b	TAGACGGTGGCTGTGCGTGGTGGAGAAGCAGGGCACGTGCATTACCATCCAATGCCGCCGGGTGGGTGGGTGGAATGGATGGATGGTTCTTGATGTGCCCATCTTCTCCACCGAGCACGAACTGTCTT	128	6	145727415	145727542	+	-
zma-miR164b-3p	miRBase	miR164	3p	ATGTGCCCATCTTCTCCACC	20	zma-MIR164b	TAGACGGTGGCTGTGCGTGGTGGAGAAGCAGGGCACGTGCATTACCATCCAATGCCGCCGGGTGGGTGGGTGGAATGGATGGATGGTTCTTGATGTGCCCATCTTCTCCACCGAGCACGAACTGTCTT	128	6	145727415	145727542	+	-
zma-miR164c-5p	miRBase	miR164	5p	TGGAGAAGCAGGGCACGTGCA	21	zma-MIR164c	TGGCGAGGTGCGCGCGGTGGAGAAGCAGGGCACGTGCATTCTTTCCGTCGCCGGCCGGCTTGGCAGCGGCCGGCGGCCCGGCTCTCGCAGTCACGCGTACGTCGCCTGAGCGGCGCGCGCGAGAGAGAGAGACACGGCAGGTCGTCGCCGGCGCGGCTAACTGGTGCAGGTGCAGCAGCTAGCTTCTGAAACCCAGCCAGCCAGCCAGCCGGCCGGCCGGCCGATCGATGCGTGCATGTGCCCTTCTTCTCCATCGGGCACGCCTCGCCT	270	6	157477837	157478106	+	-
zma-miR164c-3p	miRBase	miR164	3p	CATGTGCCCTTCTTCTCCATC	21	zma-MIR164c	TGGCGAGGTGCGCGCGGTGGAGAAGCAGGGCACGTGCATTCTTTCCGTCGCCGGCCGGCTTGGCAGCGGCCGGCGGCCCGGCTCTCGCAGTCACGCGTACGTCGCCTGAGCGGCGCGCGCGAGAGAGAGAGACACGGCAGGTCGTCGCCGGCGCGGCTAACTGGTGCAGGTGCAGCAGCTAGCTTCTGAAACCCAGCCAGCCAGCCAGCCGGCCGGCCGGCCGATCGATGCGTGCATGTGCCCTTCTTCTCCATCGGGCACGCCTCGCCT	270	6	157477837	157478106	+	-
zma-miR399f-5p	miRBase	miR399	5p	GGGCAACTTCTCCTTTGGCAGA	22	zma-MIR399f	CAGGATGTGCACCTGCATTTCTGGGCAACTTCTCCTTTGGCAGATGCGCGAGAATGTGCCACTGCTGCCAAAGGAAATTTGCCCCGGAATTCATCTGCACAAGCA	105	6	163860157	163860261	-	-
zma-miR399f-3p	miRBase	miR399	3p	TGCCAAAGGAAATTTGCCCCG	21	zma-MIR399f	CAGGATGTGCACCTGCATTTCTGGGCAACTTCTCCTTTGGCAGATGCGCGAGAATGTGCCACTGCTGCCAAAGGAAATTTGCCCCGGAATTCATCTGCACAAGCA	105	6	163860157	163860261	-	-
zma-miR399c-5p	miRBase	miR399	5p	GGGTACGTCTCCTTTGGCACA	21	zma-MIR399c	TGCTTGCTGAGCATGAATTACAGGGTACGTCTCCTTTGGCACAGCAGAATGCACACATCATCAGTCGAGAGAGTAAGCTCGCTGCGTGCTCGCCGGCCTGGGAGCGGAAGTCGCAGGCCAAATGGCGGCGGTGCAGATGCATGAACAGCAGCTGCCGTATATATGCGTGCCAAAGGAGAATTGCCCTGCGATTCTAGGCTCAGCGAT	207	6	163867932	163868138	+	-
zma-miR399c-3p	miRBase	miR399	3p	TGCCAAAGGAGAATTGCCCTG	21	zma-MIR399c	TGCTTGCTGAGCATGAATTACAGGGTACGTCTCCTTTGGCACAGCAGAATGCACACATCATCAGTCGAGAGAGTAAGCTCGCTGCGTGCTCGCCGGCCTGGGAGCGGAAGTCGCAGGCCAAATGGCGGCGGTGCAGATGCATGAACAGCAGCTGCCGTATATATGCGTGCCAAAGGAGAATTGCCCTGCGATTCTAGGCTCAGCGAT	207	6	163867932	163868138	+	-
zma-miR172d-5p	miRBase	miR172	5p	CAGCACCATCAAGATTCACA	20	zma-MIR172d	GTGCAGCACCATCAAGATTCACATCCCCAGCTCGATCTGTGCATGATGAGATGAGAATCTTGATGATGCTGCAT	74	6	172029786	172029859	+	-
zma-miR172d-3p	miRBase	miR172	3p	AGAATCTTGATGATGCTGCA	20	zma-MIR172d	GTGCAGCACCATCAAGATTCACATCCCCAGCTCGATCTGTGCATGATGAGATGAGAATCTTGATGATGCTGCAT	74	6	172029786	172029859	+	-
zma-miR167e-5p	miRBase	miR167	5p	TGAAGCTGCCAGCATGATCTG	21	zma-MIR167e	TTGGTGTGTCCTCTAGTAGCTGAAGCTGCCAGCATGATCTGAGGTGTCCACAGCATATATATGGAAGCAGCTAGCGATCAGATCATGCTGTGCAGTTTCATCTGCTCGTGGACGCACAC	119	7	10115799	10115917	-	-
zma-miR167e-3p	miRBase	miR167	3p	GATCATGCTGTGCAGTTTCATC	22	zma-MIR167e	TTGGTGTGTCCTCTAGTAGCTGAAGCTGCCAGCATGATCTGAGGTGTCCACAGCATATATATGGAAGCAGCTAGCGATCAGATCATGCTGTGCAGTTTCATCTGCTCGTGGACGCACAC	119	7	10115799	10115917	-	-
zma-miR398b-5p	miRBase	miR398	5p	GGGGCGGACTGGGAACACATG	21	zma-MIR398b	GGGGGCGGACTGGGAACACATGGGAATGAGATGAGATCATTGCTCGGTCGTGCTGGCCTGGGCCGTCGGCGCGCGTTGATCTTGCATGTGTTCTCAGGTCGCCCCCGG	108	7	39887938	39888045	+	-
zma-miR398b-3p	miRBase	miR398	3p	TGTGTTCTCAGGTCGCCCCCG	21	zma-MIR398b	GGGGGCGGACTGGGAACACATGGGAATGAGATGAGATCATTGCTCGGTCGTGCTGGCCTGGGCCGTCGGCGCGCGTTGATCTTGCATGTGTTCTCAGGTCGCCCCCGG	108	7	39887938	39888045	+	-
zma-miR171g-5p	miRBase	miR171	5p	TATTGACTTGGCTCATCTCTC	21	zma-MIR171g	AGAACGAGGCGACATGGCATGGTATTGACTTGGCTCATCTCTCGCCCACACCAGAATCCACAAGTGCCGGAGGAGGTGAGCCGAGCCAATATCACTTCATGTCATCTAGCGT	112	7	44057814	44057925	-	-
zma-miR171g-3p	miRBase	miR171	3p	GAGGTGAGCCGAGCCAATATC	21	zma-MIR171g	AGAACGAGGCGACATGGCATGGTATTGACTTGGCTCATCTCTCGCCCACACCAGAATCCACAAGTGCCGGAGGAGGTGAGCCGAGCCAATATCACTTCATGTCATCTAGCGT	112	7	44057814	44057925	-	-
zma-miR172a	miRBase	miR172	3p	AGAATCTTGATGATGCTGCA	20	zma-MIR172a	GCGTGGCATCATCAAGATTCACAACCCATCAATCCGAACCACTGATTTGGAATGCATGCATGAGAATCTTGATGATGCTGCAT	83	7	54276707	54276789	-	-
zma-miR169p-5p	miRBase	miR169	5p	TAGCCAAGGATGACTTGCCGG	21	zma-MIR169p	GTAGCCAAGGATGACTTGCCGGCATTATATTTCTTGGCCCGCCGGCAAGTCATCTGGGGCTACGC	65	7	114375728	114375792	-	-
zma-miR169p-3p	miRBase	miR169	3p	GGCAAGTCATCTGGGGCTACG	21	zma-MIR169p	GTAGCCAAGGATGACTTGCCGGCATTATATTTCTTGGCCCGCCGGCAAGTCATCTGGGGCTACGC	65	7	114375728	114375792	-	-
zma-miR156g-5p	miRBase	miR156	5p	TGACAGAAGAGAGTGAGCAC	20	zma-MIR156g	GGCTGACAGAAGAGAGTGAGCACGCATCGGCCAGACTGCATCTATATACGGCTGCTCCTGGCGAATGGATAGATGCCAAGGCGCAGCTGCTGTTGCGTGCTCACTTCTCTTTCTGTCAGCT	121	7	119411284	119411404	+	-
zma-miR156g-3p	miRBase	miR156	3p	GCTCACTTCTCTTTCTGTCAGC	22	zma-MIR156g	GGCTGACAGAAGAGAGTGAGCACGCATCGGCCAGACTGCATCTATATACGGCTGCTCCTGGCGAATGGATAGATGCCAAGGCGCAGCTGCTGTTGCGTGCTCACTTCTCTTTCTGTCAGCT	121	7	119411284	119411404	+	-
zma-miR166j-5p	miRBase	miR166	5p	GGTTTGTTTGTCTGGTTCAAGG	22	zma-MIR166j	CAAGTTGAAGATTAGGTTAAGGGGTTTGTTTGTCTGGTTCAAGGTCGCCACACAGCAGGGAAAACCCATTTCGCCTTGAAGCATGCACCATGATGGGTGTACCTGTTGGTGATCTCGGACCAGGCTTCAATCCCTTTAACTAGCGTCTGCATAT	154	7	128589394	128589547	+	-
zma-miR166j-3p	miRBase	miR166	3p	TCGGACCAGGCTTCAATCCCT	21	zma-MIR166j	CAAGTTGAAGATTAGGTTAAGGGGTTTGTTTGTCTGGTTCAAGGTCGCCACACAGCAGGGAAAACCCATTTCGCCTTGAAGCATGCACCATGATGGGTGTACCTGTTGGTGATCTCGGACCAGGCTTCAATCCCTTTAACTAGCGTCTGCATAT	154	7	128589394	128589547	+	-
zma-miR156j-5p	miRBase	miR156	5p	TGACAGAAGAGAGAGAGCACA	21	zma-MIR156j	CGAGTGGACCTCGGGAGCGATGACAGAAGAGAGAGAGCACAACCCAGCACCAGCGAGGAAAAGCCTCGCTTCTGCGAGGGCCGTGTGCTCTCTGCTCTCACTGTCATCGCCCACAGGCCACCGAA	125	7	134663764	134663888	-	-
zma-miR156j-3p	miRBase	miR156	3p	TGCTCTCTGCTCTCACTGTCATC	23	zma-MIR156j	CGAGTGGACCTCGGGAGCGATGACAGAAGAGAGAGAGCACAACCCAGCACCAGCGAGGAAAAGCCTCGCTTCTGCGAGGGCCGTGTGCTCTCTGCTCTCACTGTCATCGCCCACAGGCCACCGAA	125	7	134663764	134663888	-	-
zma-miR169k-5p	miRBase	miR169	5p	TAGCCAAGGATGACTTGCCTG	21	zma-MIR169k	CGATGAGAGCACTGCTCTGGTAGCCAAGGATGACTTGCCTGTGGCCTCCATCAGTCGCAGAGGACGCTGTTCTTCTGCTTGTGGTTGTCGATCGCAGGCAGTCTCCTTGGCTAGCCCGAGCGGCTCTCATCCA	133	7	142286603	142286735	+	-
zma-miR169k-3p	miRBase	miR169	3p	GGCAGTCTCCTTGGCTAG	18	zma-MIR169k	CGATGAGAGCACTGCTCTGGTAGCCAAGGATGACTTGCCTGTGGCCTCCATCAGTCGCAGAGGACGCTGTTCTTCTGCTTGTGGTTGTCGATCGCAGGCAGTCTCCTTGGCTAGCCCGAGCGGCTCTCATCCA	133	7	142286603	142286735	+	-
zma-miR1432-5p	miRBase	miR1432	5p	CTCAGGAGAGATGACACCGAC	21	zma-MIR1432	GCTCAGGAGAGATGACACCGACGCCAGACGGACCGGTCCATCCGCGCCGTGTCTGTCCGTCTGAAGTGGGTGTCATCTCGCCTGAAGCA	89	7	165932790	165932878	-	-
zma-miR1432-3p	miRBase	miR1432	3p	GGGTGTCATCTCGCCTGAAGCA	22	zma-MIR1432	GCTCAGGAGAGATGACACCGACGCCAGACGGACCGGTCCATCCGCGCCGTGTCTGTCCGTCTGAAGTGGGTGTCATCTCGCCTGAAGCA	89	7	165932790	165932878	-	-
zma-miR164d-5p	miRBase	miR164	5p	TGGAGAAGCAGGGCACGTGCA	21	zma-MIR164d	TGAGTGAGAAGGACCACGCTGGAGAAGCAGGGCACGTGCATGCACATACGCCATTCTCGATCTCTCCTCTCCACCACTACTGCATCTAGCTATCTCCATGGATGGATGTACGTAGCTCGGACTGGATCGATCGGAGAAGCAATAAGCTAGCGAGCTCATGCATGCTGGCTGTGCACGCACGTGGTCTCCTTCTCCATCACGGTTCTTTCTCACTTC	216	7	178154786	178155001	+	-
zma-miR164d-3p	miRBase	miR164	3p	CACGTGGTCTCCTTCTCCAT	20	zma-MIR164d	TGAGTGAGAAGGACCACGCTGGAGAAGCAGGGCACGTGCATGCACATACGCCATTCTCGATCTCTCCTCTCCACCACTACTGCATCTAGCTATCTCCATGGATGGATGTACGTAGCTCGGACTGGATCGATCGGAGAAGCAATAAGCTAGCGAGCTCATGCATGCTGGCTGTGCACGCACGTGGTCTCCTTCTCCATCACGGTTCTTTCTCACTTC	216	7	178154786	178155001	+	-
zma-miR169b-5p	miRBase	miR169	5p	CAGCCAAGGATGACTTGCCGA	21	zma-MIR169b	TAGGCTCGGGGACTACGGTGCAGCCAAGGATGACTTGCCGATCTATCGTCGATCAACGAGCGACGCCTCTGATGTCTGATCTCGACATCTATCGTCGTCAGACCATCATCATCTATCGGCAAGTTGTTCTTGGCTACACCGTGGCTCCTGCTCCTG	156	8	5012331	5012486	-	-
zma-miR169b-3p	miRBase	miR169	3p	GGCAAGTTGTTCTTGGCTACA	21	zma-MIR169b	TAGGCTCGGGGACTACGGTGCAGCCAAGGATGACTTGCCGATCTATCGTCGATCAACGAGCGACGCCTCTGATGTCTGATCTCGACATCTATCGTCGTCAGACCATCATCATCTATCGGCAAGTTGTTCTTGGCTACACCGTGGCTCCTGCTCCTG	156	8	5012331	5012486	-	-
zma-miR159a-5p	miRBase	miR159	5p	GAGCTCCTATCATTCCAATGA	21	zma-MIR159a	TCGATGCTTTGGGTTTGAAGCGGAGCTCCTATCATTCCAATGAAGGGTCGTTCCGAAGGGCTGGTTCCGCTGCTCGTTCATGGTTCCCACTATCCTATCTCATCATGTGTATATATGTAATCCATGGGGGAGGGTTTCTCTCGTCTTTGAGATAGGCTTGTGGTTTGCATGACCGAGGAGCTGCACCGCCCCCTTGCTGGCCGCTCTTTGGATTGAAGGGAGCTCTGCATCCTGATCCACCCCTCC	246	8	10753073	10753318	+	-
zma-miR159a-3p	miRBase	miR159	3p	TTTGGATTGAAGGGAGCTCTG	21	zma-MIR159a	TCGATGCTTTGGGTTTGAAGCGGAGCTCCTATCATTCCAATGAAGGGTCGTTCCGAAGGGCTGGTTCCGCTGCTCGTTCATGGTTCCCACTATCCTATCTCATCATGTGTATATATGTAATCCATGGGGGAGGGTTTCTCTCGTCTTTGAGATAGGCTTGTGGTTTGCATGACCGAGGAGCTGCACCGCCCCCTTGCTGGCCGCTCTTTGGATTGAAGGGAGCTCTGCATCCTGATCCACCCCTCC	246	8	10753073	10753318	+	-
zma-miR159h-3p	miRBase	miR159	3p	TTTGGAGTGAAGGGAGCTCTG	21	zma-MIR159h	GGTGCTCCCTTCACACCAATAAACGGTCGATCTGATGGGTGGTACAGCTGCTCGTTCATGGTTCCCACTGTCCCATCTCATCAGAGAGAGAGAAGATCGTGAGAGAGCGAGAGATGCTTGAGATGGGCTTGTGGTTTGCATGACCGAGGAGCTGCCTCGTCCCCTTCGTTGACCGCTGTTTGGAGTGAAGGGAGCTCTGC	200	8	10908489	10908688	+	-
zma-miR159i-5p	miRBase	miR159	5p	GTGCTCCCTTCACACCAATAA	21	zma-MIR159i	AGTTTGATTCACTAGACCTGATCCCCTAGACTAGACGGTCTGGTCTTAAGGCGGTGCTCCCTTCACACCAATAAACGGTCGATCTGATGGGTGGTACAGCTGCTCGTTCATGGTTCCCACTGTCCCATCTCATCAGAGAGAGAGAAGATCATGAGAGAGCGAGAGATGCTTGAGATGGGCTTGTGGTTTGCATGACCGAGGAGCTGCCTCGTCCCCTTCGTTGACCGCTGTTTGGAGTGAAGGGAGCTCTGC	252	8	10912332	10912583	+	-
zma-miR159j-3p	miRBase	miR159	3p	TTTGGATTGAAGGGAGCTCTG	21	zma-MIR159j	AGTTTGATTCACTAGACCTGATCCCCTAGACTAGACGGTCTGGTCTTAAGGCGGTGCTCCCTTCAAACCAATAAACGGTCGATCTGATGGGTGGTACAGCTGCTCGTTCATGGTTCCCACTGTCCCATCTCATCAGAGAGAGAGAAGATCGTGAGAGAGCGAGAGATGCTTGAGATGGGCTTGTGGTTTGCATGACCGAGGAGCTGCCTCGTCCCCTTCGTTGACCGCTGTTTGGATTGAAGGGAGCTCTGC	252	8	10920901	10921152	+	-
zma-miR159k-3p	miRBase	miR159	3p	TTTGGATTGAAGGGAGCTCTG	21	zma-MIR159k	GGTGCTCCCTTCAAACCAATAAACGGTCGATCTGATGGGTGGTACAACTGCTCGTTCATGGTTCCCACTGTCCCATCTCATCAGAGAGAGAGAAGATCGTGAGAGAGCGAGAGATGCTTGAGATGGGCTTGTGGTTTGCATGACCGAGGAGCTGCATCGTCCCCTTCGTTGACCGCTGTTTGGATTGAAGGGAGCTCTGC	200	8	10947058	10947257	+	-
zma-miR159b-3p	miRBase	miR159	3p	TTTGGATTGAAGGGAGCTCTG	21	zma-MIR159b	TAGACGGTCTGGTCTTAAGGCGGTGCTCCCTTCAAACCAATAAACGGTCGATCTGATGGGTGGTACAGCTGCTCGTTCATGGTTCCCACTGTCCCATCTCATCAGAGAGAGAGAGAGATGCTTGAGATGGGCTTGTGGTTTGCATGACCGAGGAGCTGCACGTCCCCTTCGTTGACCGCTGTTTGGATTGAAGGGAGCTCTGCATCTTGGTCCCAAGACTT	221	8	10950933	10951153	+	-
zma-miR319d-5p	miRBase	miR319	5p	AGAGCGTCCTTCAGTCCACTC	21	zma-MIR319d	TGGTCGCCGGCCGGATGGAAGAGAGCGTCCTTCAGTCCACTCAGGGGCGGTGCTAGGGTCGGATTAGCTGCCGACTCATTCACCCACATGCCAAGCAAACGGCCATGGAAACGAGCTTCGCAGATGAGTGAATGAAGCGGGAGGTAAAAGCTTCGATCTCGCACCGTCTTTGCTTGGACTGAAGGGTGCTCCCTCCGATCCTTTCCTTGTTT	212	8	27608247	27608458	-	-
zma-miR319d-3p	miRBase	miR319	3p	TTGGACTGAAGGGTGCTCCC	20	zma-MIR319d	TGGTCGCCGGCCGGATGGAAGAGAGCGTCCTTCAGTCCACTCAGGGGCGGTGCTAGGGTCGGATTAGCTGCCGACTCATTCACCCACATGCCAAGCAAACGGCCATGGAAACGAGCTTCGCAGATGAGTGAATGAAGCGGGAGGTAAAAGCTTCGATCTCGCACCGTCTTTGCTTGGACTGAAGGGTGCTCCCTCCGATCCTTTCCTTGTTT	212	8	27608247	27608458	-	-
zma-miR159d-5p	miRBase	miR159	5p	GAGCTCCCTTCGATCCAATCC	21	zma-MIR159d	AAGAAGATGCCGATCGATCGAAGAGCTCCCTTCGATCCAATCCAGGAGGGAAAGTGGTCGGCTGCAGCTGCCGGTTCATGGATACCTCTCTGGTGCAGCAATGGCCGAGATGCTCACCTGCACTTGCATGGGTGTGCATGACCCGGGAGACGAACCGACCATCATCTTTCCCTCGTGCTTGGATTGAAGGGAGCTCCTCTCTCTCTCTCTCTCTTAT	217	8	27675686	27675902	+	-
zma-miR159d-3p	miRBase	miR159	3p	CTTGGATTGAAGGGAGCTCCT	21	zma-MIR159d	AAGAAGATGCCGATCGATCGAAGAGCTCCCTTCGATCCAATCCAGGAGGGAAAGTGGTCGGCTGCAGCTGCCGGTTCATGGATACCTCTCTGGTGCAGCAATGGCCGAGATGCTCACCTGCACTTGCATGGGTGTGCATGACCCGGGAGACGAACCGACCATCATCTTTCCCTCGTGCTTGGATTGAAGGGAGCTCCTCTCTCTCTCTCTCTCTTAT	217	8	27675686	27675902	+	-
zma-miR408b-5p	miRBase	miR408	5p	CAGGGACGAGGCAGAGCATGG	21	zma-MIR408b	GACAGGGACGAGGCAGAGCATGGGTAGGGGGCCATCAACAGAATTCCAAATTTGATTTCTGTTTGCTCGCTCACAAAATGGAGGGACTCACCACAAACACACTCAGGCGTTGTTGCTCCCTCCCCTGCACTGCCTCTTCCCTGGCTC	147	8	39583938	39584084	-	-
zma-miR408b-3p	miRBase	miR408	3p	CTGCACTGCCTCTTCCCTGGC	21	zma-MIR408b	GACAGGGACGAGGCAGAGCATGGGTAGGGGGCCATCAACAGAATTCCAAATTTGATTTCTGTTTGCTCGCTCACAAAATGGAGGGACTCACCACAAACACACTCAGGCGTTGTTGCTCCCTCCCCTGCACTGCCTCTTCCCTGGCTC	147	8	39583938	39584084	-	-
zma-miR164h-5p	miRBase	miR164	5p	TGGAGAAGCAGGGCACGTGTG	21	zma-MIR164h	GTGGAGAAGCAGGGCACGTGTGAATTCATTCGTTCCATCGACGGTCTGGCGCCGACTCACGCATCGCCGGCGCGGCGAGCTGAGCGCGTGACACGGAAAGCAGGTCCGCCGCGCCGGCGCCCGCGCTGGCCGATCGACCGGCTAACTGTAGCTCCACGAAGCAAAGCCAGGCCAGCCGGCCGATCGATGCGTGCGTGCATGTGCCCTTCTTCTCCATCG	219	8	121773384	121773602	+	-
zma-miR164h-3p	miRBase	miR164	3p	CATGTGCCCTTCTTCTCCATC	21	zma-MIR164h	GTGGAGAAGCAGGGCACGTGTGAATTCATTCGTTCCATCGACGGTCTGGCGCCGACTCACGCATCGCCGGCGCGGCGAGCTGAGCGCGTGACACGGAAAGCAGGTCCGCCGCGCCGGCGCCCGCGCTGGCCGATCGACCGGCTAACTGTAGCTCCACGAAGCAAAGCCAGGCCAGCCGGCCGATCGATGCGTGCGTGCATGTGCCCTTCTTCTCCATCG	219	8	121773384	121773602	+	-
zma-miR169q-5p	miRBase	miR169	5p	TAGCCAAGAATGGCTTGCCTA	21	zma-MIR169q	TTAGCCAAGAATGGCTTGCCTATCTCCATTATTTGGTCCATCTTCTTGGGAGACCTCCCTCATGGTGTGGATGGAATGTGGATGGTGGCAGGCCTTCTGGCTAAGT	106	8	130375286	130375391	+	-
zma-miR169q-3p	miRBase	miR169	3p	GGCAGGCCTTCTGGCTAAG	19	zma-MIR169q	TTAGCCAAGAATGGCTTGCCTATCTCCATTATTTGGTCCATCTTCTTGGGAGACCTCCCTCATGGTGTGGATGGAATGTGGATGGTGGCAGGCCTTCTGGCTAAGT	106	8	130375286	130375391	+	-
zma-miR319c-5p	miRBase	miR319	5p	GAGCTCTCTTCAGTCCACTC	20	zma-MIR319c	GGTTTATGGCTTCTGTGGAAGAGAGCTCTCTTCAGTCCACTCTAAAATGGCTGTAGGGTTTCATTAGCTGCCGACTCATCCATTCACCTGCCAAGAACCATGGGCAAGCGGTAGGTCTGGTCTTGGTAGCCGAGTGGGTGGCGCGGGAGCTAAAATCAAACTCTACGCTGTTTACGGTTGGACTGAAGGGTGCTCCCTTCAATTTGCCCAAACACT	216	8	152709450	152709665	-	-
zma-miR319c-3p	miRBase	miR319	3p	TTGGACTGAAGGGTGCTCCC	20	zma-MIR319c	GGTTTATGGCTTCTGTGGAAGAGAGCTCTCTTCAGTCCACTCTAAAATGGCTGTAGGGTTTCATTAGCTGCCGACTCATCCATTCACCTGCCAAGAACCATGGGCAAGCGGTAGGTCTGGTCTTGGTAGCCGAGTGGGTGGCGCGGGAGCTAAAATCAAACTCTACGCTGTTTACGGTTGGACTGAAGGGTGCTCCCTTCAATTTGCCCAAACACT	216	8	152709450	152709665	-	-
zma-miR396b-5p	miRBase	miR396	5p	TTCCACAGCTTTCTTGAACTG	21	zma-MIR396b	AGATGGCCTTCTTTGTGATCTTCCACAGCTTTCTTGAACTGCATCTCTCAGAGGAGCGGCAGCTTCAACTCCTCCACCCGCATCAGCAGGTGCATGCAGTTCAATAAAGCTGTGGGAAACTGCAGAGAGAGGCCAG	136	9	15122740	15122875	-	-
zma-miR396b-3p	miRBase	miR396	3p	GTTCAATAAAGCTGTGGGAAA	21	zma-MIR396b	AGATGGCCTTCTTTGTGATCTTCCACAGCTTTCTTGAACTGCATCTCTCAGAGGAGCGGCAGCTTCAACTCCTCCACCCGCATCAGCAGGTGCATGCAGTTCAATAAAGCTGTGGGAAACTGCAGAGAGAGGCCAG	136	9	15122740	15122875	-	-
zma-miR399j-5p	miRBase	miR399	5p	AGGCAGCTCTCCTCTGGCAGG	21	zma-MIR399j	AGGCAGCTCTCCTCTGGCAGGCAGGCGCGCGGTCATCGTCGCCATCGACGACGGTTGCTTGGCTCTGCTATGCTGTGTTCGTTCGTCCATGGTGTGCTAGCTAGCCGTGCATGCATTGCAGTGTAACATGCGTGCATGCACGCGCGTACGTCCTGCCAAAGGAGAGTTGCCCTGC	175	9	24309478	24309652	-	-
zma-miR399j-3p	miRBase	miR399	3p	TGCCAAAGGAGAGTTGCCCTG	21	zma-MIR399j	AGGCAGCTCTCCTCTGGCAGGCAGGCGCGCGGTCATCGTCGCCATCGACGACGGTTGCTTGGCTCTGCTATGCTGTGTTCGTTCGTCCATGGTGTGCTAGCTAGCCGTGCATGCATTGCAGTGTAACATGCGTGCATGCACGCGCGTACGTCCTGCCAAAGGAGAGTTGCCCTGC	175	9	24309478	24309652	-	-
zma-miR166b-5p.9_90025277	miRBase	miR166	5p	GGAATGTTGTCTGGTTCAAGG	21	zma-MIR166b	GTGGAATGTTGTCTGGTTCAAGGTCTTGCTTTCCGATTTGAGGATGATCCATGCTTGCATGTGTAGTTTTTTTTGTTCCTCAGATCTACAAGATCTCGGACCAGGCTTCATTCCCC	116	9	90025277	90025392	+	-
zma-miR166b-3p.9_90025277	miRBase	miR166	3p	TCGGACCAGGCTTCATTCCC	20	zma-MIR166b	GTGGAATGTTGTCTGGTTCAAGGTCTTGCTTTCCGATTTGAGGATGATCCATGCTTGCATGTGTAGTTTTTTTTGTTCCTCAGATCTACAAGATCTCGGACCAGGCTTCATTCCCC	116	9	90025277	90025392	+	-
zma-miR171n-5p	miRBase	miR171	5p	TATTGGTGAGGTTCAATCCGA	21	zma-MIR171n	ATATTGGTGAGGTTCAATCCGATGTTAGGTTTTACAAAAGCTGTAAAATCAGTATCTGATTGAGCCGCGCCAATATCT	78	9	100082921	100082998	-	-
zma-miR171n-3p	miRBase	miR171	3p	TGATTGAGCCGCGCCAATATC	21	zma-MIR171n	ATATTGGTGAGGTTCAATCCGATGTTAGGTTTTACAAAAGCTGTAAAATCAGTATCTGATTGAGCCGCGCCAATATCT	78	9	100082921	100082998	-	-
zma-miR169r-5p	miRBase	miR169	5p	CAGCCAAGGATGACTTGCCGG	21	zma-MIR169r	GCAGCCAAGGATGACTTGCCGGGTATTTTGAGCATGCATGTTACAGGGGAGCATATGCAATCTGTTTGGAATTTTGAGCCCATACCGTGCGGTGCCTGTCTTCCGGCAAGTTGTCCTTGGCTACAT	126	9	111791259	111791384	-	-
zma-miR169r-3p	miRBase	miR169	3p	GGCAAGTTGTCCTTGGCTACA	21	zma-MIR169r	GCAGCCAAGGATGACTTGCCGGGTATTTTGAGCATGCATGTTACAGGGGAGCATATGCAATCTGTTTGGAATTTTGAGCCCATACCGTGCGGTGCCTGTCTTCCGGCAAGTTGTCCTTGGCTACAT	126	9	111791259	111791384	-	-
zma-miR167i-5p	miRBase	miR167	5p	TGAAGCTGCCAGCATGATCTG	21	zma-MIR167i	ACTTCGCTGGTGTGAGAGCTTGAAGCTGCCAGCATGATCTGGCTGCTCAAACGCCGCCGGCCTCCCAAGTGCTCGATCGGTGGCGCTTCACCAGATCATGTTGCAGCTTCACTCTCTCGCAACCAGCGAA	130	9	113476123	113476252	+	-
zma-miR167i-3p	miRBase	miR167	3p	GATCATGTTGCAGCTTCAC	19	zma-MIR167i	ACTTCGCTGGTGTGAGAGCTTGAAGCTGCCAGCATGATCTGGCTGCTCAAACGCCGCCGGCCTCCCAAGTGCTCGATCGGTGGCGCTTCACCAGATCATGTTGCAGCTTCACTCTCTCGCAACCAGCGAA	130	9	113476123	113476252	+	-
zma-miR171d-5p	miRBase	miR171	5p	TGTTGGCTCGGCTCACTCAGA	21	zma-MIR171d	AGAAATGGAAGTGTAACTATGGTGTTGGCTCGGCTCACTCAGAAGTTGAAGCCGAATCCAAATGGTAGCTGCCGGCGTTTCTGATTGAGCCGTGCCAATATCTCAGTACTCTTTCATGCTG	121	9	128212960	128213080	+	-
zma-miR171d-3p	miRBase	miR171	3p	TGATTGAGCCGTGCCAATATC	21	zma-MIR171d	AGAAATGGAAGTGTAACTATGGTGTTGGCTCGGCTCACTCAGAAGTTGAAGCCGAATCCAAATGGTAGCTGCCGGCGTTTCTGATTGAGCCGTGCCAATATCTCAGTACTCTTTCATGCTG	121	9	128212960	128213080	+	-
zma-miR528b-5p	miRBase	miR528	5p	TGGAAGGGGCATGCAGAGGAG	21	zma-MIR528b	GTGGAAGGGGCATGCAGAGGAGCACGAACGAGGTGTGGTTGGCCCCTCGTTAGCTCTCCTGTGCCTGCCTCTTCCATT	78	9	156643654	156643731	-	-
zma-miR528b-3p	miRBase	miR528	3p	CCTGTGCCTGCCTCTTCCATT	21	zma-MIR528b	GTGGAAGGGGCATGCAGAGGAGCACGAACGAGGTGTGGTTGGCCCCTCGTTAGCTCTCCTGTGCCTGCCTCTTCCATT	78	9	156643654	156643731	-	-
zma-miR171j-5p	miRBase	miR171	5p	TATTGACGCGGTTCAATTCGA	21	zma-MIR171j	AATGGCCGCGAGCTAGACGGGGTATTGACGCGGTTCAATTCGAGAGCTCGAGCCCTAGCAGAGGCCAGGGGGGGTGGGGCTCTGCTCTCTGATTGAGCCGTGCCAATATCACGTCCCACTCGCCCTCGC	129	10	59006552	59006680	+	-
zma-miR171j-3p	miRBase	miR171	3p	TGATTGAGCCGTGCCAATATC	21	zma-MIR171j	AATGGCCGCGAGCTAGACGGGGTATTGACGCGGTTCAATTCGAGAGCTCGAGCCCTAGCAGAGGCCAGGGGGGGTGGGGCTCTGCTCTCTGATTGAGCCGTGCCAATATCACGTCCCACTCGCCCTCGC	129	10	59006552	59006680	+	-
zma-miR2275c-3p	miRBase	miR2275	3p	TTCAGTTTCCTCTAATATCTCA	22	zma-MIR2275c	AGAGAGATGTTGATATGTGTCATTTGAAGTGAGGATTAGAGGGACTTGAACCATTCATAGCTTGTTCGGTTATGTCTGGATCGAAGAGGGTTGGAAGGTCCTTTCTAGTTAAAATTAAATAGAAAGAGATTGAATCCCTTTAACCTCCTATCCAGATGTGACCAAACAAACTCTCATTGGGAGTAAAAGGGGTTCAGTTTCCTCTAATATCTCATCTTAAATGGCCCATCATCTCCT	237	10	70573557	70573793	+	-
zma-miR395k-5p	miRBase	miR395	5p	GTTTCCTTCAAGCACTTCACAT	22	zma-MIR395k	AGTTTCCTTCAAGCACTTCACATGGAGCATTCTGTCTTAGAGAAAGCTTAATTTATTGCATTGTGAAGTGTTTGAGGAAACTCT	84	10	78600241	78600324	-	-
zma-miR395k-3p	miRBase	miR395	3p	GTGAAGTGTTTGAGGAAACTC	21	zma-MIR395k	AGTTTCCTTCAAGCACTTCACATGGAGCATTCTGTCTTAGAGAAAGCTTAATTTATTGCATTGTGAAGTGTTTGAGGAAACTCT	84	10	78600241	78600324	-	-
zma-miR395l-5p	miRBase	miR395	5p	GTTCCTTCCAAACACTTCACCA	22	zma-MIR395l	AGTTCCTTCCAAACACTTCACCAGCTAGGCCATGCACAAGATGAACCCACATTAGGCTAGTGAAGTGTTTGGAGGAACTCT	81	10	78600412	78600492	-	-
zma-miR395l-3p	miRBase	miR395	3p	GTGAAGTGTTTGGAGGAACTC	21	zma-MIR395l	AGTTCCTTCCAAACACTTCACCAGCTAGGCCATGCACAAGATGAACCCACATTAGGCTAGTGAAGTGTTTGGAGGAACTCT	81	10	78600412	78600492	-	-
zma-miR395m-5p	miRBase	miR395	5p	GTTCCTTTCAAACACTTCACAT	22	zma-MIR395m	AGTTCCTTTCAAACACTTCACATGGAGCTTCTCATTGGTGGATATATTCTTGAGACCCGTGTGAAGTGTTTGGAGGAACTCT	82	10	78600541	78600622	-	-
zma-miR395m-3p	miRBase	miR395	3p	GTGAAGTGTTTGGAGGAACTC	21	zma-MIR395m	AGTTCCTTTCAAACACTTCACATGGAGCTTCTCATTGGTGGATATATTCTTGAGACCCGTGTGAAGTGTTTGGAGGAACTCT	82	10	78600541	78600622	-	-
zma-miR395c-5p	miRBase	miR395	5p	GTTCCCTGCAAACACTTCACCA	22	zma-MIR395c	TCTTGGTTGGTTCTCCCTTGGAGTTCCCTGCAAACACTTCACCAGCTAGGCCATAGTGCCGGCCCTTGCACAATGTTGTATCTGATCACCTAGCTAGTGTGAAGTGTTTGGAGGAACTCTAGGTGTTATCCAGCAATG	138	10	78600687	78600824	-	-
zma-miR395c-3p	miRBase	miR395	3p	GTGAAGTGTTTGGAGGAACTC	21	zma-MIR395c	TCTTGGTTGGTTCTCCCTTGGAGTTCCCTGCAAACACTTCACCAGCTAGGCCATAGTGCCGGCCCTTGCACAATGTTGTATCTGATCACCTAGCTAGTGTGAAGTGTTTGGAGGAACTCTAGGTGTTATCCAGCAATG	138	10	78600687	78600824	-	-
zma-miR2118e	miRBase	miR2118	3p	TTCCTGATGTCTCCCATTCCTA	22	zma-MIR2118e	CCAAGGAAGTGGAAGAAAGAGAATGTCTAAGAGCAGTGGGAATGGAAACATGAAGGAAAGCATGAACTATGTTCTTTTTTCTGAATGTTTTCCTGATGTCTCCCATTCCTACGGTTCTTAGGTGCTCCTTCCTCTTCCTTTGG	143	10	118740501	118740643	-	-
zma-miR2118a	miRBase	miR2118	3p	TTCCTGATGCCTCTCATTCCTA	22	zma-MIR2118a	CCTAAGGGCAGTAGGGATGAGAACATGAAGGAACGCGAGTGCTCTGAATTTCTCGTCTCGCACGGAGGACATGTGCACTGTCGTGTTCCTGATGCCTCTCATTCCTATGGTTCTTAGG	118	10	118790595	118790712	-	-
zma-miR2118c	miRBase	miR2118	3p	TTCCTAATGCCTCCCATTCCTA	22	zma-MIR2118c	GGAAGAGGAAGTAAAGATGATCTAAGAGCAGTGGGCATGGGAACATGGAGGAAGGCCTATGAGGTTGAAACCTCATTTTGTGTCTTCCTAATGCCTCCCATTCCTATCGTTCTTAGGTGATCCTTCCTCTTGC	133	10	118813614	118813746	-	-
zma-miR156h-5p	miRBase	miR156	5p	TGACAGAAGAGAGTGAGCAC	20	zma-MIR156h	CGGGCTCGCGCGCGCGCGGTGACAGAAGAGAGTGAGCACACGGCCGGGCGTGACGGCACGTGCCGTCGCGGCCGCGTGCTCACTGCTCTTTCTGTCATCCGCTGGTCCGGGCCTC	115	10	129642870	129642984	-	-
zma-miR156h-3p	miRBase	miR156	3p	GCTCACTGCTCTTTCTGTCATC	22	zma-MIR156h	CGGGCTCGCGCGCGCGCGGTGACAGAAGAGAGTGAGCACACGGCCGGGCGTGACGGCACGTGCCGTCGCGGCCGCGTGCTCACTGCTCTTTCTGTCATCCGCTGGTCCGGGCCTC	115	10	129642870	129642984	-	-
zma-miR171k-5p	miRBase	miR171	5p	TGGTATTGTTTCGGCTCATGT	21	zma-MIR171k	GGGAGGAAGAAGACGACATGGCGTGGTATTGTTTCGGCTCATGTCCTTCTTGACTGGATGTGATGTGAGCCGAACCAATATCACTCATGTATTCTTCATTCTGA	104	10	138536838	138536941	-	-
zma-miR171k-3p	miRBase	miR171	3p	GTGAGCCGAACCAATATCACT	21	zma-MIR171k	GGGAGGAAGAAGACGACATGGCGTGGTATTGTTTCGGCTCATGTCCTTCTTGACTGGATGTGATGTGAGCCGAACCAATATCACTCATGTATTCTTCATTCTGA	104	10	138536838	138536941	-	-
zma-miR171b-5p.10_143745137	miRBase	miR171	5p	GATATTGGCGCGGTTCAATC	20	zma-MIR171b	CGGGATATTGGCGCGGTTCAATCAGAAAGCTTGCGCTCCAGGCCCGAGGGGCTCCACTCTTTGATTGAGCCGTGCCAATATCACG	85	10	143745137	143745221	-	-
zma-miR171b-3p.10_143745137	miRBase	miR171	3p	TTGAGCCGTGCCAATATCAC	20	zma-MIR171b	CGGGATATTGGCGCGGTTCAATCAGAAAGCTTGCGCTCCAGGCCCGAGGGGCTCCACTCTTTGATTGAGCCGTGCCAATATCACG	85	10	143745137	143745221	-	-
zma-miR395n-5p	miRBase	miR395	5p	GTTCTCTACAAGCACTTCACGA	22	zma-MIR395n	AGTTCTCTACAAGCACTTCACGAGGCTTCGTACTGAGAGCTTTTGTGAAGTGTTTGGGGGAACTCT	66	10	145465911	145465976	+	-
zma-miR395n-3p	miRBase	miR395	3p	GTGAAGTGTTTGGGGGAACTC	21	zma-MIR395n	AGTTCTCTACAAGCACTTCACGAGGCTTCGTACTGAGAGCTTTTGTGAAGTGTTTGGGGGAACTCT	66	10	145465911	145465976	+	-
zma-miR395o-5p	miRBase	miR395	5p	GTTCTCTTCAAGCACTTCACGA	22	zma-MIR395o	AGTTCTCTTCAAGCACTTCACGAGGCATCACACTGAGAGCTTTTGTGAAGTGTTTGGGGGAACTCTTGGTGTCACAAATCATTTGCATTTGCTTGATGTTAGTCATGCACCATGTGATATGAGATAAAGGACATGGCAACGTTTTGTGTTACTAGGAGTTCCCTACAAGCACTTCATGAGACCTTGACTTAATAAAGGGCCATTGTGAAGTGTTTGGGTGAACTCT	226	10	145466084	145466309	+	-
zma-miR395o-3p	miRBase	miR395	3p	GTGAAGTGTTTGGGTGAACTC	21	zma-MIR395o	AGTTCTCTTCAAGCACTTCACGAGGCATCACACTGAGAGCTTTTGTGAAGTGTTTGGGGGAACTCTTGGTGTCACAAATCATTTGCATTTGCTTGATGTTAGTCATGCACCATGTGATATGAGATAAAGGACATGGCAACGTTTTGTGTTACTAGGAGTTCCCTACAAGCACTTCATGAGACCTTGACTTAATAAAGGGCCATTGTGAAGTGTTTGGGTGAACTCT	226	10	145466084	145466309	+	-
zma-miR395p-5p	miRBase	miR395	5p	GTTCCCTTCAAGCACTTCACAT	22	zma-MIR395p	AGTTCCCTTCAAGCACTTCACATGAGGCACCATTCAAATGACAACTCCATTTAAGATTATGTGTAATGTGAAGTGTTTGGGGGAACTCT	89	10	145466402	145466490	+	-
zma-miR395p-3p	miRBase	miR395	3p	GTGAAGTGTTTGGGGGAACTC	21	zma-MIR395p	AGTTCCCTTCAAGCACTTCACATGAGGCACCATTCAAATGACAACTCCATTTAAGATTATGTGTAATGTGAAGTGTTTGGGGGAACTCT	89	10	145466402	145466490	+	-
zma-miR396d	miRBase	miR396	5p	TTCCACAGGCTTTCTTGAACTG	22	zma-MIR396d	CGGGCATGCTTTCCACAGGCTTTCTTGAACTGTGAACTCGTGGGCGTGGTGGTGGTGGTGCTGGTGCTGGGTGT	74	10	148727703	148727776	+	-
zma-miR393c-5p	miRBase	miR393	5p	TCCAAAGGGATCGCATTGATCT	22	zma-MIR393c	CTCCAAAGGGATCGCATTGATCTAACCTGCCGATCGACGCCGACGTACGTACGTGCCCGAGGACAAGCAGATCAGTCAGTGCAATCCCTTTGGAATT	97	10	149451810	149451906	-	-
zma-miR393c-3p	miRBase	miR393	3p	GTCAGTGCAATCCCTTTGGAAT	22	zma-MIR393c	CTCCAAAGGGATCGCATTGATCTAACCTGCCGATCGACGCCGACGTACGTACGTGCCCGAGGACAAGCAGATCAGTCAGTGCAATCCCTTTGGAATT	97	10	149451810	149451906	-	-
zma-miR156c	miRBase	miR156	5p	TGACAGAAGAGAGTGAGCAC	20	zma-MIR156c	GGTGGAGGAGAGGTGAAAGCTGACAGAAGAGAGTGAGCACACATGGTGCCTTTCTTGCATGATGTATGATCGAGAGAGTTCATGCTCGAAGCTATGCGTGCTCACTTCTCTCTTTGTCAGCCATTAGAACTCCTCTATC	139	-	-	-	NA	-
zma-miR160e	miRBase	miR160	5p	TGCCTGGCTCCCTGTATGCCA	21	zma-MIR160e	AGGGAATATGCCTGGCTCCCTGTATGCCACTCGCACGGCTACCACACCCCGGTGGCCGCTGCGGCTGGCGTGCGAGGTGCCAAGCATGGCCCCC	94	-	-	-	NA	-
zma-miR395j-3p	miRBase	miR395	3p	GTGAAGTGTTTGGGGGAACTC	21	zma-MIR395j	AGTTCCCTTCAAGCACTTCACATGAGGCACCATTCAAATAACACATTTCAAGATTAGGTGCATGTGAAGTGTTTGGGGGAACTCT	85	-	-	-	NA	-
zma-miR444a	miRBase	miR444	3p	TGCAGTTGTTGTCTCAAGCTT	21	zma-MIR444a	CAAGCTAGAGGCAGCAACTGCATACCTTGCAAGAAAAAATCGGTTTTGTTGACGTACCGATGATTTTCTTGCAAGTTGTGCAGTTGTTGTCTCAAGCTTG	100	-	-	-	NA	-
zma-miR444b	miRBase	miR444	3p	TGCAGTTGTTGTCTCAAGCTT	21	zma-MIR444b	TGACGAGCTAGAGGCAGCAACTGCATATCTTGCAAGAAAATTGGTTTTCGAACCATACCGATAATTTTCTTGCAAGTTGTGCAGTTGTTGTCTCAAGCTTGCTG	104	-	-	-	NA	-
miR166a-5p	Ensembl_Plants	miR166	5p	AATGTTGTCTGGTTCAAGG	19	ENSRNA049476983.mir-166	TTTGAGTGAAATGTTGTCTGGTTCAAGGTCTTGCTTTGCGATTTGAGGATGATCCATGCTTGCATGTGTTGTTTTTTATTCCTCGGATATGCAAGATCTCGGACCAGGCTTCATTCCCCTCAGG	124	1	226854057	226854180	-	-
miR166a-3p	Ensembl_Plants	miR166	3p	TCGGACCAGGCTTCATTCCCC	21	ENSRNA049476983.mir-166	TTTGAGTGAAATGTTGTCTGGTTCAAGGTCTTGCTTTGCGATTTGAGGATGATCCATGCTTGCATGTGTTGTTTTTTATTCCTCGGATATGCAAGATCTCGGACCAGGCTTCATTCCCCTCAGG	124	1	226854057	226854180	-	-
miR395p-5p	Ensembl_Plants	miR395	5p	GTTCCCTTCAAGCACTTCACAT	22	ENSRNA049472588.mir-395	GTGTTACCATGAGTTCCCTTCAAGCACTTCACATGAGGCACCATTCAATAACACATTTCAAGATTAGGTGCATGTGAAGTGTTTGGGGGAACTCTTGGTGGCAC	104	2	6276762	6276865	-	-
miR395p-3p	Ensembl_Plants	miR395	3p	GTGAAGTGTTTGGGGGAACTC	21	ENSRNA049472588.mir-395	GTGTTACCATGAGTTCCCTTCAAGCACTTCACATGAGGCACCATTCAATAACACATTTCAAGATTAGGTGCATGTGAAGTGTTTGGGGGAACTCTTGGTGGCAC	104	2	6276762	6276865	-	-
miR395o-5p	Ensembl_Plants	miR395	5p	GTTCTCTGCAAGCACTTCACGA	22	ENSRNA049472360.mir-395	ATGTCCCTAGGAGTTCTCTGCAAGCACTTCACGAGGCATTGTTTCAAGAGGTTTTGTCAAGTGTTTGAGAACTCTTGGTGTTTG	84	2	6287561	6287644	-	-
miR156l-5p	Ensembl_Plants	miR156	5p	TGACAGAAGAGAGTGAGCAC	20	ENSRNA049470554.mir-156	CTGACAGAAGAGAGTGAGCACACATGGTGCCTTTCTTGCATGATGTATGATCGAGAGAGTTCATGCTCGAAGCTATGCGTGCTCACTTCTCTCTCTGTCAG	101	3	6928583	6928683	-	-
miR172e	Ensembl_Plants	miR172	3p	GAATCCTGATGATGCTGCAT	20	ENSRNA049460987.mir-172	CTGTTGTCTTGCGCGGCATCATCAGGATTCACACAAGGTAAACAAAGTCGGATGCCCATGCACATATGTAGGTCTGGTTCGATCCGTTGCTTGCGTGAGAATCCTGATGATGCTGCATTGGAGAACAA	128	4	15295180	15295307	-	-
miR169d	Ensembl_Plants	miR169	3p	CATAGGCAGTCTCCTTGGCTA	21	ENSRNA049477046.MIR169_2	GGCCTACCTCTGATAGCCAAGGATGACTTGCCTATGTCCTTTGTTTACAAAGGACCTGAATGTGTGGACCATTGAGAGGTTCATAGGCAGTCTCCTTGGCTAGCCTGAGTGGCCCC	116	4	49565645	49565760	+	-
miR166m-5p	Ensembl_Plants	miR166	5p	GGAATGTTGGCTGGCTCGAGG	21	ENSRNA049467197.mir-166	TTTGTGGGGAATGTTGGCTGGCTCGAGGCAGCATCCGCGTCCTAGCCTGCTGTTGCCGGTCGTTTTGCCTGCTACCGGTCGGCCGGACAGATCGAGGCGTCGGACCAGGCTTCATTCCTCGCAAA	125	4	181111889	181112013	+	-
miR166m-3p	Ensembl_Plants	miR166	3p	TCGGACCAGGCTTCATTCCTC	21	ENSRNA049467197.mir-166	TTTGTGGGGAATGTTGGCTGGCTCGAGGCAGCATCCGCGTCCTAGCCTGCTGTTGCCGGTCGTTTTGCCTGCTACCGGTCGGCCGGACAGATCGAGGCGTCGGACCAGGCTTCATTCCTCGCAAA	125	4	181111889	181112013	+	-
miR169p-5p.4_185272328	Ensembl_Plants	miR169	5p	TAGCCAAGGATGACTTGCCGG	21	ENSRNA049467153.MIR169_2	CGTTTCGTTATGTAGCCAAGGATGACTTGCCGGCCGACATATGCCTCTCTCGTTCGTCCCTGACCGGCCGGGAAACACATCACGCCGCATGCATGCATGCATGCATATGTGTGTACGTACTACGTGTGCATGCATGCATGTGCTGCCGCGCGCAGCAAACTGCGAGGAATCGTCCGTCCGGCAGGTTCTTCTCTTTGGCTACACGATGGCCTCG	214	4	185272328	185272541	-	-
miR167j-5p	Ensembl_Plants	miR167	5p	TGAAGCTGCCAGCCTGATCTG	21	ENSRNA049466589.MIR167_1	TGGTGTGAGAGATTGAAGCTGCCAGCCTGATCTGATCTGACCACCGAAACCTAGCTAGCTACCTATGCCTTGGGTTGCTGTAGTGCAGGTGCGGCATGCAGTTGTCAACAACAGCCTGATCTGATCCACGAGGAATTGAATTCTCACACGTGGATGGCCTTGGAGAGATGGACTAGCTATTCTCTTCGGCCATTCGGCCATGCACGCACGCATGGAGCTTGCTGGATGCAATGCATATGCATGACTCTCCGTCATCAGATCATGTGGCAGCTTCACTCTCTCACCAC	287	4	241398465	241398751	+	-
miR167i-3p	Ensembl_Plants	miR167	3p	GATCATGTGGCAGCTTCAC	19	ENSRNA049466589.MIR167_1	TGGTGTGAGAGATTGAAGCTGCCAGCCTGATCTGATCTGACCACCGAAACCTAGCTAGCTACCTATGCCTTGGGTTGCTGTAGTGCAGGTGCGGCATGCAGTTGTCAACAACAGCCTGATCTGATCCACGAGGAATTGAATTCTCACACGTGGATGGCCTTGGAGAGATGGACTAGCTATTCTCTTCGGCCATTCGGCCATGCACGCACGCATGGAGCTTGCTGGATGCAATGCATATGCATGACTCTCCGTCATCAGATCATGTGGCAGCTTCACTCTCTCACCAC	287	4	241398465	241398751	+	-
miR399i-5p.5_150426221	Ensembl_Plants	miR399	5p	GTGCGGCTCTCCTCTGGCATG	21	ENSRNA049460361.mir-399	GTGAGAATCACAGTGCGGCTCTCCTCTGGCATGAAGGCGCGGCTGAGAGGCACGAACAGTTTCTGGCCTTCCCCTGCCAATGCCAAAGGAGAGCTGCCCTGCCATTCGTTA	111	5	150426221	150426331	+	-
miR399i-5p.5_150574429	Ensembl_Plants	miR399	5p	GTGCGGCTCTCCTCTGGCATG	21	ENSRNA049460340.mir-399	GTGAGAATCACAGTGCGGCTCTCCTCTGGCATGAAGGCGCGGCTGAGAGGCACGAACAGTTTCTGGCCTTCCCCTGCCAATGCCAAAGGAGAGCTGCCCTGCCATTCGTTA	111	5	150574429	150574539	+	-
miR396h	Ensembl_Plants	miR396	5p	CCACAGCTTTCTTGAACTG	19	ENSRNA049477975.MIR396	CCCTGCCATCTTCCACAGCTTTCTTGAACTGCATCATGCATGCAGCAGGCTGTGCTGTGGACCTGATCGAGTTTCAATTGATCCAAGCAAGCAAGAGGGCAGTTCAATAAAGCTGTGGGAAATTGCAGAGA	131	5	220222138	220222268	-	-
miR399j-3p	Ensembl_Plants	miR399	3p	TGCCAAAGGAGATTTGCCC	19	ENSRNA049477506.mir-399	CCATGCATTACCGGGTTGGGTCTCCTCTGGCAGTAACTTGCCTGGTCGTCGATGACCTAGCTAGCGTTGCGTGCAGAGACACTGCCAAAGGAGATTTGCCCAGCAATGCAGTC	113	6	163865484	163865596	-	-
miR160g-5p	Ensembl_Plants	miR160	5p	TGCCTGGCTCCCTGTATGCCA	21	ENSRNA049476276.mir-160	ATATGCCTGGCTCCCTGTATGCCACTCGCACGGCTACCACACCCCCGGTGGCCGCTGCGGCTGGCGTGCGAGGTGCCAAGCATGG	85	7	5206371	5206455	-	-
miR160f-3p	Ensembl_Plants	miR160	3p	GCGTGCGAGGTGCCAAGCATG	21	ENSRNA049476276.mir-160	ATATGCCTGGCTCCCTGTATGCCACTCGCACGGCTACCACACCCCCGGTGGCCGCTGCGGCTGGCGTGCGAGGTGCCAAGCATGG	85	7	5206371	5206455	-	-
miR169j-5p	Ensembl_Plants	miR169	5p	TAGCCAAGGATGACTTGCCTG	21	ENSRNA049454868.MIR169_2	AGATAGCCAAGGATGACTTGCCTGTGGCCTCTTGGCATGGCGGCGGCTCGAGCTCATTAAACAACCTTGTGCACGTTTGATTTGCTCTCTCCCTGTGGCCTCGATCACAGGCAGTCTCCTTGGCTAGTCCGGACGTCTCT	140	7	142353911	142354050	+	-
miR169e	Ensembl_Plants	miR169	3p	AGGCAGTCTCCTTGGCTA	18	ENSRNA049454868.MIR169_2	AGATAGCCAAGGATGACTTGCCTGTGGCCTCTTGGCATGGCGGCGGCTCGAGCTCATTAAACAACCTTGTGCACGTTTGATTTGCTCTCTCCCTGTGGCCTCGATCACAGGCAGTCTCCTTGGCTAGTCCGGACGTCTCT	140	7	142353911	142354050	+	-
miR169p-5p.B73V4_ctg13_31850	Ensembl_Plants	miR169	5p	TAGCCAAGGATGACTTGCCGG	21	ENSRNA049478942.MIR169_2	AGGCTGTTATGTAGCCAAGGATGACTTGCCGGCCGATGCCTCCTCGATATACAATCGTCGCACATCCCTGGGCGGCCGGGAACGTCGCATGCATGCAAACTGTTGGGGCATCGGCCGGCAGGTTCTTCTCTTTGGCTACACGATGGCCTCG	151	B73V4_ctg13	31850	32000	+	-
miR166d-5p	Ensembl_Plants	miR166	5p	GGAATGTTGTCTGGTTCAAGG	21	ENSRNA049479848.mir-166	TCTGAGTGGAATGTTGTCTGGTTCAAGGTCTTGCTTTCCGATTTGAGGATGATCCATGCTTGCATGTGTAGTTTTTTTTGTTCCTCAGATCTACAAGATCTCGGACCAGGCTTCATTCCCCTCAGG	126	B73V4_ctg73	2450	2575	+	-
miR166d-3p	Ensembl_Plants	miR166	3p	TCGGACCAGGCTTCATTCCCC	21	ENSRNA049479848.mir-166	TCTGAGTGGAATGTTGTCTGGTTCAAGGTCTTGCTTTCCGATTTGAGGATGATCCATGCTTGCATGTGTAGTTTTTTTTGTTCCTCAGATCTACAAGATCTCGGACCAGGCTTCATTCCCCTCAGG	126	B73V4_ctg73	2450	2575	+	-
miR2_6276770	NovelMiRNA	-	3p	AAGTGTTTGGGGGAACTCTT	20	MIR2_6276770	TCCCTTCAAGCACTTCACATGAGGCACCATTCAATAACACATTTCAAGATTAGGTGCATGTGAAGTGTTTGGGGGAACTCTT	82	2	6276770	6276851	-	MFE=-37.2; miRDeep-P Score=49.7;
miR3_58127907	NovelMiRNA	-	3p	CACTGCCTCTTCCCTGGCTC	20	MIR3_58127907	GGGATGAGACAGAGCATGGGATGGGGCCATCAACAAAGTGGAGGGACTAGCTTGCGAGGCAGAAAGAAGGTGCCAGTGCCGGTGCCTCCCCGGTGAAACGATGATGGGAGTGTTGTTGCTCCCTCCCCTGCACTGCCTCTTCCCTGGCTC	150	3	58127907	58128056	-	MFE=-66.8; miRDeep-P Score=26.2;
miR10_124524787	NovelMiRNA	-	5p	TGAGGGCGCCGCCGTCGGCGAG	22	MIR10_124524787	TGAGGGCGCCGCCGTCGGCGAGGTCCTAGGTGGTGCCCGTATGTT	45	10	124524787	124524831	+	MFE=-24.9; miRDeep-P Score=2.2;
