# Supplementary material for: Integrated Multi-Omics Reveals Significant Roles of Non-Additively Expressed Small RNAs in Heterosis for Maize Plant Height
Source: Int J Mol Sci. 2023 May 23;24(11):9150. doi: 10.3390/ijms24119150 (PMC10252383; doi:10.3390/ijms24119150)
Supplement: Supplementary file 1 [file ijms-24-09150-s001.zip › Table-S2.xlsx]

## Sheet: New
Table S2. Expression patterns of miRNAs in hybrids.
miRNA_Name	miR_Family	Hybrid2Female_Log2FC	Hybrid2Female_Pvalue	Hybrid2Male_Log2FC	Hybrid2Male_Pvalue	Female2Male_Log2FC	Female2Male_Pvalue	D/A_ratio	Expression_Pattern
miR169e	miR169	-1.28412	0.750904	NA	NA	0.394676	0.922258	-1	NoDiff
miR169j-5p	miR169	1.38923	0.733511	0.162962	0.968143	NA	NA	NA	NoDiff
miR399i-5p.5_150574429	miR399	-7.11561	1.08983e-07	NA	NA	6.24513	5.96949e-06	-1	DLPE
miR399i-5p.5_150426221	miR399	-7.34315	2.63484e-08	NA	NA	6.46164	1.80145e-06	-1	DLPE
miR172e	miR172	0.450187	0.842348	0.752537	0.805847	0.239624	0.938483	2.7385	NoDiff
miR167i-3p	miR167	NA	NA	-1.72572	0.671965	-2.24007	0.582674	-1	NoDiff
miR167j-5p	miR167	1.23972	0.679809	-0.335015	0.894058	-1.70703	0.553416	1.61432	NoDiff
miR169p-5p.4_185272328	miR169	-0.0519215	0.987169	0.925598	0.819254	0.88992	0.824548	0.82563	NoDiff
miR166m-3p	miR166	0.442857	0.107412	0.21669	0.443786	-0.29164	0.327994	11.4627	NoDiff
miR166m-5p	miR166	0.509289	0.279872	-0.148515	0.765487	-0.749871	0.16007	1.4132	NoDiff
miR156l-5p	miR156	-1.46477	0.104517	-0.469814	0.67669	0.931882	0.316065	-1.42258	NoDiff
miR395o-5p	miR395	2.89984	0.438851	1.62079	0.685055	NA	NA	NA	NoDiff
miR395p-3p	miR395	-2.59387	0.230079	-2.58448	0.303128	0.0183861	0.991675	-21.1712	NoDiff
miR395p-5p	miR395	-3.45878	0.0634809	-2.53933	0.317191	0.839099	0.592511	-2.51919	NoDiff
miR160f-3p	miR160	0.427461	0.916568	-0.858675	0.80545	-1.35003	0.711331	-0.790918	NoDiff
miR160g-5p	miR160	1.14371	0.000256557	0.392299	0.248172	-0.836078	0.00725585	4.13872	THPE
miR166a-3p	miR166	-0.412296	0.075114	0.0030855	0.990151	0.336728	0.199178	-0.204793	NoDiff
miR166a-5p	miR166	-1.07782	0.182805	-0.298668	0.778612	0.672567	0.459071	-1.05357	NoDiff
miR169d	miR169	-2.38147	0.120916	-1.29592	0.536993	0.965522	0.51481	-1.60054	NoDiff
miR399j-3p	miR399	-3.88085	0.0734759	NA	NA	3.00998	0.203713	-1	NoDiff
miR396h	miR396	0.504481	0.088869	-0.00626818	0.982417	-0.587734	0.0422401	2.60251	NoDiff
miR169p-5p.B73V4_ctg13_31850	miR169	1.08041	0.50849	0.818815	0.649494	-0.29336	0.895277	28.2897	NoDiff
miR166d-3p	miR166	-0.387872	0.100099	0.0359472	0.884374	0.342947	0.185493	-0.111637	NoDiff
miR166d-5p	miR166	0.0626929	0.863772	1.20818	0.0134937	1.05777	0.0350439	1.36811	DHPE
zma-miR11969-3p	miR11969	-2.52977	0.244648	-2.58276	0.300795	-0.0377586	0.982982	-17.1099	NoDiff
zma-miR11970-3p	miR11970	1.4564	0.120903	-0.176342	0.835452	-1.725	0.0734185	1.11645	NoDiff
zma-miR11970-5p	miR11970	-0.237192	0.764889	-1.19746	0.0566484	-1.02956	0.180155	-1.26588	NoDiff
zma-miR1432-3p	miR1432	1.42599	0.0762549	-0.675306	0.317664	-2.18278	0.00562397	0.305051	AE
zma-miR1432-5p	miR1432	1.22135	0.00217116	-1.36014	0.000148677	-2.65297	8.59342e-11	-0.364318	AE
zma-miR156a-3p	miR156	1.38923	0.733511	0.162962	0.968143	NA	NA	NA	NoDiff
zma-miR156a-5p	miR156	-2.17034	0.0133054	-0.938479	0.421207	1.17705	0.175613	-1.55583	DLPE
zma-miR156b-3p	miR156	-0.534319	0.895818	NA	NA	-0.342693	0.933069	-1	NoDiff
zma-miR156b-5p	miR156	-2.20447	0.0011167	-0.92661	0.269069	1.18108	0.0775501	-1.42847	DLPE
zma-miR156d-3p	miR156	-1.16407	0.377309	-1.25763	0.374493	-0.119174	0.916671	-34.5501	NoDiff
zma-miR156d-5p	miR156	-0.717329	0.142999	-1.39934	0.00362876	-0.749025	0.105748	-2.36054	TLPE
zma-miR156e-3p	miR156	-1.37317	0.371257	2.00786	0.552818	3.33277	0.130791	-0.18945	NoDiff
zma-miR156e-5p	miR156	-1.42935	0.124204	-0.540477	0.670819	0.77674	0.443097	-1.14734	NoDiff
zma-miR156f-3p	miR156	-1.22635	0.274912	0.0415163	0.979685	1.16826	0.384769	-0.657223	NoDiff
zma-miR156f-5p	miR156	-1.48943	0.0633911	-0.441432	0.681385	0.947653	0.281344	-1.1194	NoDiff
zma-miR156g-3p	miR156	-2.80108	0.0818989	-2.79453	0.113784	-0.0346075	0.977211	-114.332	NoDiff
zma-miR156g-5p	miR156	-1.03446	0.260446	-0.604714	0.55624	0.347662	0.717703	-2.68898	NoDiff
zma-miR156h-3p	miR156	-0.827719	0.818257	-0.858675	0.80545	-0.098412	0.975885	-2.80108	NoDiff
zma-miR156h-5p	miR156	-2.59294	0.00330055	-1.93634	0.0538601	0.579959	0.463688	-3.39092	TLPE
zma-miR156i-3p	miR156	-1.28412	0.750904	NA	NA	0.394676	0.922258	-1	NoDiff
zma-miR156i-5p	miR156	-1.83712	0.0399084	-0.327784	0.808986	1.47018	0.159823	-1.06185	DLPE
zma-miR156j-3p	miR156	-0.4585	0.819865	1.68513	0.647513	2.12765	0.480694	0.549126	NoDiff
zma-miR156j-5p	miR156	-0.415492	0.764706	0.682882	0.727708	0.966534	0.573128	0.641297	NoDiff
zma-miR156k-3p	miR156	-1.11849	0.0480172	-0.245083	0.740556	0.823661	0.200573	-1.17532	DLPE
zma-miR156k-5p	miR156	-1.36493	4.65229e-05	0.305462	0.43522	1.58769	1.36268e-05	-0.638227	DLPE
zma-miR156l-3p	miR156	-1.94615	0.0916826	2.58306	0.371778	4.48658	0.00943888	-0.463685	AE
zma-miR156l-5p	miR156	-1.92922	0.0356116	-0.238278	0.855172	1.59885	0.110649	-1.00478	DLPE
zma-miR159a-3p	miR159	0.372556	0.236297	-0.548158	0.0859878	-1.00519	0.00296442	0.028383	AE
zma-miR159a-5p	miR159	-0.217058	0.543393	0.342977	0.409566	0.469853	0.28834	0.57802	NoDiff
zma-miR159b-3p	miR159	0.363262	0.275056	-0.650255	0.0569307	-1.08904	0.00203596	-0.115115	AE
zma-miR159c-3p	miR159	-1.45413	2.10961e-06	4.27004	1.90074e-09	5.47498	2.93238e-08	-0.251792	AE
zma-miR159c-5p	miR159	-1.39285	0.00757799	5.7561	6.26067e-05	7.07345	1.11044e-07	-0.182713	AE
zma-miR159d-3p	miR159	-1.25915	6.12449e-05	5.15873	5.17708e-11	6.31737	2.32208e-17	-0.121279	AE
zma-miR159d-5p	miR159	-1.23223	0.016743	5.68022	0.000107795	6.81308	2.78409e-07	-0.0460935	AE
zma-miR159f-3p	miR159	0.781557	0.0125092	-0.431531	0.162982	-1.29568	9.92339e-05	0.491867	AE
zma-miR159f-5p	miR159	-0.94129	0.042026	0.48227	0.449688	1.33401	0.0139213	-0.369317	AE
zma-miR159h-3p	miR159	-0.534319	0.895818	NA	NA	-0.342693	0.933069	-1	NoDiff
zma-miR159i-5p	miR159	NA	NA	-1.72572	0.671965	-2.24007	0.582674	-1	NoDiff
zma-miR159j-3p	miR159	0.592718	0.0695698	-0.704076	0.020226	-1.37975	2.37595e-05	0.0305893	AE
zma-miR159k-3p	miR159	0.400349	0.206574	-0.585095	0.0617753	-1.06788	0.00114419	0.0470721	AE
zma-miR160a-3p	miR160	0.427461	0.916568	-1.5384	0.634974	-2.04364	0.546475	-0.440113	NoDiff
zma-miR160a-5p	miR160	1.01459	0.000387633	0.370896	0.239632	-0.725514	0.0180937	4.55647	THPE
zma-miR160b-3p	miR160	0.408067	0.467823	0.218125	0.72809	-0.289428	0.682619	5.26138	NoDiff
zma-miR160b-5p	miR160	1.18254	7.48914e-05	0.436485	0.176787	-0.835864	0.00441764	4.47572	THPE
zma-miR160c-3p	miR160	1.16924	0.200541	2.28009	0.0469717	1.00768	0.49735	6.06092	THPE
zma-miR160c-5p	miR160	1.10324	0.000132289	0.333081	0.306195	-0.859219	0.00503949	3.7094	THPE
zma-miR160d-5p	miR160	1.19683	3.65221e-05	0.409853	0.211536	-0.874773	0.00572257	4.10112	THPE
zma-miR160f-5p	miR160	0.552412	0.25713	0.550919	0.313918	-0.0900981	0.875706	12.3386	NoDiff
zma-miR160g-3p	miR160	-0.052978	0.925257	-0.154032	0.774201	-0.177657	0.77623	3.48591	NoDiff
zma-miR160g-5p	miR160	1.25074	4.22721e-05	0.530782	0.108	-0.808025	0.00738636	5.22988	THPE
zma-miR162-3p	miR162	-0.722086	0.00664307	-0.67483	0.0128417	-0.017686	0.943976	-5.07535	NoDiff
zma-miR162-5p	miR162	-0.649162	0.254473	-0.174538	0.800172	0.391769	0.529856	-0.718397	NoDiff
zma-miR164a-3p	miR164	-1.13645	0.389997	-0.0623812	0.972592	0.98313	0.498498	-0.665927	NoDiff
zma-miR164a-5p	miR164	-1.08329	0.000406515	0.128119	0.647519	1.13843	5.51467e-05	-0.629453	DLPE
zma-miR164b-3p	miR164	-1.3139	0.00300866	2.22342	0.00191781	3.43637	1.38872e-07	-0.217093	AE
zma-miR164b-5p	miR164	-1.08406	0.000380464	0.195969	0.4818	1.20606	2.70497e-05	-0.584774	DLPE
zma-miR164c-3p	miR164	-0.944227	0.016698	3.69591	2.41309e-05	4.54999	1.47902e-08	0.0649929	AE
zma-miR164c-5p	miR164	-1.11714	0.000356367	0.187936	0.517481	1.23052	2.57954e-05	-0.597812	DLPE
zma-miR164d-3p	miR164	-0.509337	0.376166	0.169302	0.792483	0.600758	0.385862	-0.355297	NoDiff
zma-miR164d-5p	miR164	-1.04418	0.000734456	0.229675	0.403181	1.19889	2.44678e-05	-0.542955	DLPE
zma-miR164e-3p	miR164	2.24185	0.425424	1.94965	0.570693	-0.342693	0.933069	10.7157	NoDiff
zma-miR164e-5p	miR164	3.23944	0.29734	-1.02873	0.621028	-4.37449	0.11792	-0.135453	NoDiff
zma-miR164f-5p	miR164	-1.4237	0.00307657	0.0756117	0.90446	1.42402	0.00611884	-0.789199	DLPE
zma-miR164g-3p	miR164	-0.192549	0.530988	0.28672	0.372087	0.41238	0.146845	0.451745	NoDiff
zma-miR164g-5p	miR164	-1.07	0.000717143	0.140033	0.631859	1.1357	0.00010877	-0.607657	DLPE
zma-miR164h-3p	miR164	-1.28483	0.0021231	4.58076	0.000179295	5.75502	2.28726e-07	-0.152775	AE
zma-miR164h-5p	miR164	-2.0585	0.123472	-0.406652	0.838169	1.55298	0.339442	-0.979863	NoDiff
zma-miR166a-3p	miR166	-0.379305	0.0954228	0.0204175	0.934302	0.321286	0.214733	-0.110831	NoDiff
zma-miR166a-5p	miR166	-0.18484	0.560017	0.297082	0.363956	0.402777	0.238859	0.629684	NoDiff
zma-miR166b-3p.1_226759256	miR166	-0.364371	0.115735	0.039344	0.878162	0.324899	0.228153	-0.0436616	NoDiff
zma-miR166b-5p.1_226759256	miR166	0.212939	0.564856	1.21685	0.00905655	0.910951	0.0514269	1.94378	DHPE
zma-miR166b-3p.9_90025277	miR166	-0.356931	0.121627	0.0365754	0.885248	0.315834	0.232777	-0.0450473	NoDiff
zma-miR166b-5p.9_90025277	miR166	-0.121427	0.755211	0.628745	0.181251	0.660806	0.164088	0.984564	NoDiff
zma-miR166c-3p	miR166	-0.393044	0.0894617	0.0280472	0.912866	0.342358	0.200812	-0.126	NoDiff
zma-miR166c-5p	miR166	-0.199127	0.661724	-0.231608	0.623327	-0.127186	0.795364	-1.29948	NoDiff
zma-miR166d-3p	miR166	-0.371537	0.110414	0.0199782	0.937144	0.314733	0.233726	-0.104999	NoDiff
zma-miR166d-5p	miR166	0.1816	0.65488	0.66901	0.150421	0.4096	0.393059	2.13456	NoDiff
zma-miR166e	miR166	-0.402757	0.0854841	0.0373807	0.880704	0.363841	0.160366	-0.140734	NoDiff
zma-miR166f	miR166	-0.314614	0.185259	-0.27594	0.259267	-0.0378909	0.882168	-1.32978	NoDiff
zma-miR166g-3p	miR166	-0.333	0.153968	-0.278961	0.256	-0.0229048	0.92729	-1.33342	NoDiff
zma-miR166g-5p	miR166	-0.322824	0.439305	-0.3663	0.433717	-0.118225	0.797432	-2.51388	NoDiff
zma-miR166h-3p	miR166	-0.295124	0.21623	-0.230094	0.351815	-0.0143481	0.955804	-0.864274	NoDiff
zma-miR166h-5p	miR166	0.595486	0.766462	-2.32754	0.0697826	-2.95701	0.0245831	-0.791807	DLPE
zma-miR166i-3p	miR166	-0.385112	0.0944136	-0.00244682	0.992293	0.305936	0.244382	-0.174663	NoDiff
zma-miR166i-5p	miR166	0.319394	0.610091	-0.642734	0.293028	-1.04045	0.0836341	-0.166816	NoDiff
zma-miR166j-3p	miR166	0.672725	0.00472492	-0.0399721	0.877936	-0.791678	0.00420045	2.08453	NoDiff
zma-miR166j-5p	miR166	1.38923	0.733511	-0.763942	0.851305	-2.24007	0.582674	1.23878	NoDiff
zma-miR166k-3p	miR166	0.673847	0.00513968	-0.137235	0.574393	-0.891169	0.000574405	1.45001	NoDiff
zma-miR166k-5p	miR166	0.673108	0.186879	0.4449	0.481686	-0.318495	0.650486	35.8943	NoDiff
zma-miR166l-3p	miR166	0.49263	0.0660591	0.36151	0.181391	-0.200395	0.459861	424.566	NoDiff
zma-miR166m-3p	miR166	0.457205	0.0936552	0.223827	0.404057	-0.299426	0.311087	11.6664	NoDiff
zma-miR166m-5p	miR166	0.783307	0.100759	0.197081	0.703084	-0.663393	0.253315	3.74506	NoDiff
zma-miR166n-3p	miR166	0.541617	0.0256642	-0.0659135	0.801272	-0.689804	0.0121665	2.12412	NoDiff
zma-miR166n-5p	miR166	1.00077	0.0910755	0.120323	0.833127	-0.975328	0.149611	2.23618	NoDiff
zma-miR167a-3p	miR167	1.59364	0.513877	2.15122	0.508132	0.397358	0.921729	6.75518	NoDiff
zma-miR167a-5p	miR167	1.20836	0.0262533	1.35455	0.0288521	0.0358289	0.953999	22.9692	THPE
zma-miR167b-3p	miR167	0.879366	0.676726	0.41159	0.862627	-0.542924	0.830911	220.177	NoDiff
zma-miR167b-5p	miR167	0.70645	0.141957	0.777175	0.466802	-0.0508331	0.941988	13.3611	NoDiff
zma-miR167c-3p	miR167	2.85552	0.00403315	1.8383	0.107059	-1.12855	0.402214	16.2862	THPE
zma-miR167c-5p	miR167	1.17989	0.0307753	1.70953	0.00844437	0.411442	0.52579	9.30946	THPE
zma-miR167d-3p	miR167	0.97154	0.21849	1.99689	0.0440257	0.934003	0.381897	4.66368	THPE
zma-miR167d-5p	miR167	1.03624	0.0429717	1.55923	0.135292	0.362771	0.61814	7.76831	THPE
zma-miR167e-3p	miR167	-1.55949	0.615899	-0.864523	0.82968	0.620556	0.849084	-1.25392	NoDiff
zma-miR167e-5p	miR167	1.01794	0.0546532	-0.674214	0.187461	-1.76611	0.00181378	0.0974746	AE
zma-miR167f-5p	miR167	1.13566	0.034423	-0.53946	0.287089	-1.75436	0.00163822	0.342866	AE
zma-miR167g-3p	miR167	-0.462069	0.584057	1.90357	0.169249	2.29798	0.0589036	0.371589	NoDiff
zma-miR167g-5p	miR167	1.96172	0.173945	1.8157	0.286842	-0.197632	0.925988	34.3938	NoDiff
zma-miR167h-3p	miR167	-0.716393	0.678261	-0.290544	0.900668	0.288963	0.884285	-0.720699	NoDiff
zma-miR167h-5p	miR167	1.0208	0.595754	0.400107	0.825081	-0.702907	0.752152	2.25873	NoDiff
zma-miR167i-3p	miR167	-0.413983	0.863213	-1.56842	0.473829	-1.24876	0.58521	-1.6113	NoDiff
zma-miR167i-5p	miR167	1.03222	0.512117	0.532981	0.759039	-0.464885	0.834006	95.5193	NoDiff
zma-miR167j-3p	miR167	1.66899	0.330066	-0.36284	0.797115	-2.09707	0.201064	0.658335	NoDiff
zma-miR167j-5p	miR167	1.07405	0.0642684	-1.10995	0.0251738	-2.24834	8.6004e-05	-0.241744	AE
zma-miR168a-3p	miR168	0.100324	0.686418	-0.283225	0.26011	-0.456704	0.0619862	0.785811	NoDiff
zma-miR168a-5p	miR168	0.990631	8.54144e-05	-0.495542	0.0376188	-1.55596	7.96485e-12	0.457777	AE
zma-miR168b-3p	miR168	0.205191	0.360266	-0.237269	0.302621	-0.518872	0.0364314	1.10257	NoDiff
zma-miR168b-5p	miR168	1.03526	2.84139e-05	-0.453336	0.0525157	-1.55876	8.89355e-12	0.542756	DHPE
zma-miR169a-3p	miR169	0.791062	0.101862	-1.09897	0.0159523	-1.96075	6.77914e-05	-0.339092	AE
zma-miR169a-5p	miR169	-0.275974	0.718259	0.276979	0.772213	0.467537	0.611131	0.333597	NoDiff
zma-miR169b-3p	miR169	1.25608	0.00736	-0.848739	0.0457006	-2.18449	5.73924e-06	0.0510498	AE
zma-miR169b-5p	miR169	0.497189	0.344052	0.305499	0.600619	-0.265738	0.670838	77.3138	NoDiff
zma-miR169c-3p	miR169	-0.868829	0.00489734	2.00104	5.19708e-11	2.78748	7.83824e-16	0.0533351	AE
zma-miR169c-5p	miR169	-0.351992	0.463458	2.64415	0.00107785	2.91051	0.000213376	0.600581	DHPE
zma-miR169f-3p	miR169	1.38923	0.733511	0.162962	0.968143	NA	NA	NA	NoDiff
zma-miR169f-5p	miR169	NA	NA	-1.72572	0.671965	-2.24007	0.582674	-1	NoDiff
zma-miR169g	miR169	-1.28038	0.751619	NA	NA	0.397358	0.921729	-1	NoDiff
zma-miR169i-3p	miR169	-0.926023	0.44038	-0.546942	0.698241	0.285588	0.825123	-1.60065	NoDiff
zma-miR169j-3p	miR169	-2.05553	0.590116	-1.72572	0.671965	0.241394	0.942538	-2.47513	NoDiff
zma-miR169j-5p	miR169	NA	NA	-1.82677	0.65369	-2.31501	0.569866	-1	NoDiff
zma-miR169k-3p	miR169	-1.51017	0.212049	-0.437066	0.782511	0.971981	0.453238	-1.18859	NoDiff
zma-miR169k-5p	miR169	NA	NA	-1.72572	0.671965	-2.24007	0.582674	-1	NoDiff
zma-miR169l-3p	miR169	0.274655	0.858125	0.961089	0.592317	0.585875	0.754535	2.3423	NoDiff
zma-miR169l-5p	miR169	-0.534319	0.895818	-4.21963	0.0599664	-3.78013	0.0768028	-1.14044	NoDiff
zma-miR169m-3p	miR169	-1.19528	0.0322366	4.65063	0.00124734	5.75478	1.46977e-05	-0.0379664	AE
zma-miR169m-5p	miR169	-1.18447	0.1173	0.566646	0.592382	1.62905	0.0591531	-0.328315	NoDiff
zma-miR169n-3p	miR169	0.0183618	0.991515	2.74729	0.322377	2.63597	0.357809	1.34988	NoDiff
zma-miR169n-5p	miR169	-0.759938	0.311629	1.23399	0.221373	1.91238	0.043606	0.100397	AE
zma-miR169o-3p	miR169	-0.534319	0.895818	NA	NA	-0.342693	0.933069	-1	NoDiff
zma-miR169o-5p	miR169	1.38923	0.733511	0.162962	0.968143	NA	NA	NA	NoDiff
zma-miR169p-3p	miR169	-0.889204	0.477047	0.258518	0.882527	1.00839	0.510738	-0.255373	NoDiff
zma-miR169p-5p	miR169	2.0033	0.140873	1.28309	0.387271	-0.79653	0.690467	23.742	NoDiff
zma-miR169q-3p	miR169	1.38923	0.733511	0.162962	0.968143	NA	NA	NA	NoDiff
zma-miR169q-5p	miR169	-0.158677	0.807211	1.61186	0.0852691	1.68361	0.0755189	0.963587	NoDiff
zma-miR169r-3p	miR169	-1.14946	0.0986268	1.40627	0.26422	2.39735	0.0211443	-0.174976	AE
zma-miR169r-5p	miR169	-1.27441	0.357891	0.327676	0.881556	1.46437	0.419621	-0.486758	NoDiff
zma-miR171a-3p	miR171	0.538663	0.491836	1.5978	0.155564	0.961045	0.417767	2.70207	NoDiff
zma-miR171a-5p	miR171	0.647186	0.352766	0.783961	0.330923	0.0563671	0.94894	8.53394	NoDiff
zma-miR171b-3p.10_143745137	miR171	-0.0467994	0.901229	0.294083	0.495788	0.255358	0.553648	1.33758	NoDiff
zma-miR171b-5p.10_143745137	miR171	-0.57898	0.742576	1.15212	0.685051	1.63794	0.494235	0.422103	NoDiff
zma-miR171b-3p.5_223360741	miR171	0.019032	0.962704	0.151075	0.747577	0.0399846	0.926581	2.79491	NoDiff
zma-miR171b-5p.5_223360741	miR171	-0.166329	0.927502	1.49436	0.559999	1.59452	0.525769	1.02595	NoDiff
zma-miR171c-3p	miR171	2.27852	4.0917e-07	0.378176	0.35605	-1.9806	4.66119e-05	2.69555	THPE
zma-miR171c-5p	miR171	1.73364	0.11462	0.951029	0.407949	-0.871858	0.542401	9.5353	NoDiff
zma-miR171d-3p	miR171	-0.429888	0.269896	0.221014	0.648832	0.576269	0.21295	-0.00608491	NoDiff
zma-miR171d-5p	miR171	-0.202556	0.654151	0.849086	0.144318	0.962265	0.0811168	0.753544	NoDiff
zma-miR171e-3p	miR171	0.11513	0.771075	0.350856	0.4245	0.16527	0.726787	2.45857	NoDiff
zma-miR171e-5p	miR171	-0.178386	0.694733	0.643919	0.265189	0.737863	0.192178	0.784124	NoDiff
zma-miR171f-3p	miR171	-0.239135	0.554756	0.523147	0.282672	0.671719	0.130464	0.720967	NoDiff
zma-miR171f-5p	miR171	3.89342	0.036146	1.18241	0.437206	-2.84143	0.267853	4.10139	THPE
zma-miR171g-3p	miR171	-0.42904	0.830817	-2.03609	0.252872	-1.66936	0.303546	-1.10127	NoDiff
zma-miR171g-5p	miR171	0.985876	0.670537	-0.403177	0.859539	-1.47642	0.559006	-0.016753	NoDiff
zma-miR171h-3p	miR171	0.919139	0.00622433	-0.221111	0.40922	-1.19884	0.000870815	1.00745	DHPE
zma-miR171h-5p	miR171	1.39088	0.163206	0.0973967	0.915985	-1.37042	0.233214	1.22771	NoDiff
zma-miR171i-3p	miR171	-0.186849	0.648547	0.442455	0.364444	0.550294	0.2453	0.787249	NoDiff
zma-miR171j-3p	miR171	0.267273	0.43526	0.296461	0.417278	-0.0466448	0.905297	5.35235	NoDiff
zma-miR171j-5p	miR171	-0.181845	0.669997	-0.451644	0.297893	-0.34274	0.415923	-3.12349	NoDiff
zma-miR171k-3p	miR171	1.0374	0.00244437	-0.178986	0.517557	-1.27793	0.000557622	1.07556	DHPE
zma-miR171k-5p	miR171	1.58201	0.133192	-1.10078	0.171935	-2.75627	0.00662591	-0.257247	AE
zma-miR171l-3p	miR171	-0.49629	0.476454	0.166401	0.852793	0.580063	0.485867	0.0201483	NoDiff
zma-miR171l-5p	miR171	-0.322902	0.935256	-0.858675	0.80545	-0.604714	0.860155	-1.39333	NoDiff
zma-miR171m-3p	miR171	0.0393804	0.946454	0.603481	0.421626	0.48416	0.522742	1.59671	NoDiff
zma-miR171m-5p	miR171	0.0722501	0.950833	1.2267	0.455771	1.08448	0.508242	1.14678	NoDiff
zma-miR171n-3p	miR171	0.0145555	0.982968	0.680006	0.450056	0.57077	0.531205	1.3381	NoDiff
zma-miR171n-5p	miR171	-0.32391	0.933108	0.162962	0.968143	0.394676	0.922258	1.15681	NoDiff
zma-miR172a	miR172	0.737148	0.0100316	0.35536	0.22783	-0.472911	0.123688	7.2663	NoDiff
zma-miR172b-3p	miR172	0.647462	0.0230105	0.396874	0.187425	-0.342281	0.265245	14.6476	NoDiff
zma-miR172b-5p	miR172	0.184178	0.559705	0.962074	0.00155095	0.706816	0.0437577	1.80673	NoDiff
zma-miR172c-3p	miR172	0.574589	0.0344307	0.30051	0.286221	-0.364646	0.220281	11.1184	NoDiff
zma-miR172c-5p	miR172	-0.176512	0.427856	0.540623	0.0282065	0.640449	0.0135482	0.750108	NoDiff
zma-miR172d-3p	miR172	0.678276	0.0153116	0.341499	0.239189	-0.426681	0.164812	8.71367	NoDiff
zma-miR172d-5p	miR172	0.222221	0.499396	0.778644	0.0161978	0.479846	0.185882	2.20513	NoDiff
zma-miR172e	miR172	-0.0914883	0.726749	0.327473	0.288508	0.333179	0.256359	1.15885	NoDiff
zma-miR2118a	miR2118	3.26971	0.121321	-1.00512	0.452349	-4.37538	0.0207929	-0.120685	AE
zma-miR2118b	miR2118	1.62145	0.296219	-0.192369	0.894299	-1.8958	0.267183	0.575644	NoDiff
zma-miR2118c	miR2118	-0.760574	0.745383	1.21762	0.762243	1.80836	0.57887	0.468522	NoDiff
zma-miR2118d	miR2118	-2.44381	0.272803	-2.83581	0.234524	-0.423632	0.802815	-5.72938	NoDiff
zma-miR2118e	miR2118	2.16304	0.593227	0.925598	0.819254	NA	NA	NA	NoDiff
zma-miR2275a-3p	miR2275	0.0839868	0.917088	-0.104097	0.906882	-0.247135	0.784014	0.850989	NoDiff
zma-miR2275a-5p	miR2275	-1.42834	0.228613	0.409138	0.830648	1.71285	0.254518	-0.515317	NoDiff
zma-miR2275b-3p	miR2275	-0.325679	0.88466	-0.437125	0.869094	-0.133997	0.957964	-1.25974	NoDiff
zma-miR2275b-5p	miR2275	1.50215	0.160567	2.00831	0.130809	0.566682	0.747277	7.35667	NoDiff
zma-miR2275c-3p	miR2275	2.92156	0.389598	-0.315923	0.903642	-3.27281	0.40274	1.38219	NoDiff
zma-miR319a-3p	miR319	0.303487	0.19642	-0.526642	0.0272533	-0.905508	0.000278919	0.0303868	NoDiff
zma-miR319a-5p	miR319	0.334549	0.340263	-0.21033	0.520783	-0.617842	0.105476	1.38477	NoDiff
zma-miR319b-3p	miR319	0.279714	0.235117	-0.55421	0.0229191	-0.910012	0.00024331	-0.0490275	NoDiff
zma-miR319b-5p	miR319	0.157047	0.617524	-0.113897	0.688949	-0.355486	0.305792	4.28782	NoDiff
zma-miR319c-3p	miR319	0.284268	0.22853	-0.56932	0.0178103	-0.929002	0.000174971	-0.0727849	NoDiff
zma-miR319c-5p	miR319	0.526958	0.115643	-0.186951	0.57045	-0.789882	0.0300806	1.33402	NoDiff
zma-miR319d-3p	miR319	0.252564	0.2831	-0.560674	0.0219075	-0.889636	0.000370118	-0.094392	NoDiff
zma-miR319d-5p	miR319	0.107903	0.737595	-0.293135	0.273083	-0.48548	0.157711	0.725806	NoDiff
zma-miR390a-3p	miR390	-0.142767	0.647616	0.606796	0.0811292	0.657701	0.0506086	0.899119	NoDiff
zma-miR390a-5p	miR390	0.45179	0.0701345	0.805194	0.00118775	0.26451	0.319778	4.22782	NoDiff
zma-miR390b-3p	miR390	-0.113377	0.744901	0.737317	0.0356639	0.753773	0.03376	0.96426	NoDiff
zma-miR390b-5p	miR390	0.48232	0.0413919	0.826803	0.000928922	0.255545	0.313972	4.51794	NoDiff
zma-miR393a-3p	miR393	-0.425618	0.305743	-0.429962	0.184264	-0.0803655	0.84195	-2.84438	NoDiff
zma-miR393a-5p	miR393	0.0415837	0.915481	0.00911017	0.981109	-0.11617	0.781919	3.0713	NoDiff
zma-miR393b-3p	miR393	1.38923	0.733511	0.162962	0.968143	NA	NA	NA	NoDiff
zma-miR393b-5p	miR393	-0.60187	0.346203	0.381385	0.616425	0.894347	0.241486	-0.134022	NoDiff
zma-miR393c-3p	miR393	-0.393233	0.343166	-0.523298	0.103606	-0.208467	0.602414	-22.2475	NoDiff
zma-miR393c-5p	miR393	-0.233414	0.555241	-0.218659	0.574721	-0.0622474	0.881079	-0.557375	NoDiff
zma-miR394a-3p	miR394	-1.69729	0.127471	-0.86119	0.566517	0.765632	0.522686	-1.86292	NoDiff
zma-miR394a-5p	miR394	-0.302732	0.241647	-0.142753	0.558322	0.0815797	0.724611	-0.570742	NoDiff
zma-miR394b-3p	miR394	-0.197747	0.855276	0.136687	0.915356	0.233444	0.847234	0.598891	NoDiff
zma-miR394b-5p	miR394	-0.292342	0.254359	-0.129337	0.594207	0.0845413	0.713015	-0.485989	NoDiff
zma-miR395a-3p	miR395	-1.08253	0.727171	-1.35393	0.713897	-0.374588	0.900412	-5.43096	NoDiff
zma-miR395a-5p	miR395	-0.531145	0.584438	-1.21636	0.226936	-0.802959	0.400257	-2.13976	NoDiff
zma-miR395b-3p	miR395	2.17321	0.353571	0.508752	0.809589	-1.70703	0.553416	4.38167	NoDiff
zma-miR395b-5p	miR395	-1.45993	0.325906	-2.19744	0.110618	-0.831445	0.486286	-3.53591	NoDiff
zma-miR395c-3p	miR395	NA	NA	-1.82677	0.65369	-2.31501	0.569866	-1	NoDiff
zma-miR395c-5p	miR395	-1.79254	0.654993	NA	NA	0.882774	0.825957	-1	NoDiff
zma-miR395d-3p	miR395	-1.79254	0.654993	-1.72572	0.671965	-0.0506185	0.98955	-3.33584	NoDiff
zma-miR395e-3p	miR395	-2.40397	0.450072	-1.82677	0.65369	0.529424	0.850403	-2.62816	NoDiff
zma-miR395e-5p	miR395	-2.59575	0.268777	-1.35539	0.708827	1.0963	0.646232	-1.29138	NoDiff
zma-miR395f-3p	miR395	-1.13868	0.634637	0.0213231	0.994658	1.11799	0.6631	-2.27304	NoDiff
zma-miR395g-3p	miR395	-2.40886	0.487537	-3.30263	0.299087	-0.868601	0.718393	-2.87119	NoDiff
zma-miR395h-3p	miR395	1.38923	0.733511	-1.74655	0.546852	-3.24307	0.338835	-0.345338	NoDiff
zma-miR395h-5p	miR395	-3.00457	0.143428	-1.35393	0.713897	1.5219	0.461882	-1.24442	NoDiff
zma-miR395i-3p	miR395	-2.20031	0.548952	-1.82677	0.65369	0.31874	0.911038	-9.98323	NoDiff
zma-miR395i-5p	miR395	NA	NA	-1.72572	0.671965	-2.24007	0.582674	-1	NoDiff
zma-miR395k-3p	miR395	-1.28412	0.750904	NA	NA	0.394676	0.922258	-1	NoDiff
zma-miR395k-5p	miR395	-1.28412	0.750904	NA	NA	0.394676	0.922258	-1	NoDiff
zma-miR395l-3p	miR395	1.38923	0.733511	0.162962	0.968143	NA	NA	NA	NoDiff
zma-miR395l-5p	miR395	-1.58145	0.694588	-2.89045	0.395284	-1.45646	0.578863	-3.1492	NoDiff
zma-miR395m-3p	miR395	1.02175	0.559506	2.63081	0.317644	1.5294	0.664743	3.28364	NoDiff
zma-miR395m-5p	miR395	-1.58145	0.694588	-1.82677	0.65369	-0.308515	0.92008	-3.5929	NoDiff
zma-miR395n-3p	miR395	-1.78922	0.65561	-1.82677	0.65369	-0.0917725	0.975644	-4.12876	NoDiff
zma-miR395n-5p	miR395	-1.63384	0.44432	0.000570796	0.999881	1.5867	0.511546	-0.697603	NoDiff
zma-miR395o-3p	miR395	1.38923	0.733511	0.162962	0.968143	NA	NA	NA	NoDiff
zma-miR395o-5p	miR395	2.38042	0.554714	-1.20105	0.633353	-3.70759	0.226557	0.0514268	NoDiff
zma-miR395p-3p	miR395	-3.05117	0.251464	-1.72572	0.671965	1.24075	0.626524	-1.53287	NoDiff
zma-miR395p-5p	miR395	-3.1328	0.14344	-2.58728	0.313489	0.390079	0.827534	-3.02163	NoDiff
zma-miR396a-3p	miR396	0.458825	0.330248	-0.188097	0.6909	-0.710321	0.168097	1.29792	NoDiff
zma-miR396a-5p	miR396	0.332291	0.254352	-0.139553	0.628904	-0.55518	0.0746753	1.95046	NoDiff
zma-miR396b-3p	miR396	0.632879	0.162344	-0.103291	0.817626	-0.805923	0.0914515	1.47098	NoDiff
zma-miR396b-5p	miR396	0.331021	0.247953	-0.320531	0.271837	-0.731949	0.0164958	0.751366	NoDiff
zma-miR396c	miR396	-0.453565	0.208037	-0.565039	0.0896198	-0.182056	0.595138	-9.24432	NoDiff
zma-miR396d	miR396	-0.43355	0.236614	-0.582578	0.0858175	-0.218477	0.519596	-19.4038	NoDiff
zma-miR396e-5p	miR396	1.08011	0.0377142	-0.118339	0.805646	-1.24888	0.00542502	1.27782	DHPE
zma-miR396f-3p	miR396	0.876651	0.102113	0.186062	0.731924	-0.760124	0.17934	2.95312	NoDiff
zma-miR396f-5p	miR396	1.06403	0.0540705	-0.113983	0.81367	-1.23739	0.0148771	1.31056	DHPE
zma-miR397b-3p	miR397	3.86968	0.0416324	-0.4826	0.694815	-4.40796	0.0192212	0.692289	DHPE
zma-miR397b-5p	miR397	-1.18984	0.00339794	-0.848958	0.0668527	0.250219	0.561826	-2.46778	TLPE
zma-miR398a-3p	miR398	-3.51156	0.00246404	-1.25079	0.479362	2.17506	0.051704	-1.23843	DLPE
zma-miR398a-5p	miR398	-0.534319	0.895818	NA	NA	-0.342693	0.933069	-1	NoDiff
zma-miR398b-3p	miR398	-2.91391	0.0147436	-0.894303	0.626321	2.08897	0.100836	-1.33584	DLPE
zma-miR398b-5p	miR398	-2.63759	0.0169256	-2.02591	0.0453709	0.519973	0.600186	-2.9774	TLPE
zma-miR399a-3p	miR399	-5.42499	3.10214e-10	-3.00025	0.0209978	2.36337	0.000105043	-1.34803	DLPE
zma-miR399a-5p	miR399	-3.98841	0.0621777	-1.72572	0.671965	2.17271	0.309976	-1.24785	NoDiff
zma-miR399b-3p	miR399	0.325017	0.913702	-2.35026	0.264929	-2.76655	0.172972	-0.880782	NoDiff
zma-miR399c-3p	miR399	-5.52527	9.2328e-11	-3.2118	0.00560143	2.1772	0.000100293	-1.37298	DLPE
zma-miR399c-5p	miR399	-9.48156	3.68017e-19	-4.75111	0.000820956	4.56765	1.59031e-06	-1.06665	DLPE
zma-miR399d-3p	miR399	-5.40149	0.000154588	0.162962	0.968143	5.49448	0.00025457	-0.943076	DLPE
zma-miR399e-3p	miR399	-2.22751	1.28534e-05	-0.858448	0.248197	1.23769	0.0242331	-1.32737	DLPE
zma-miR399e-5p	miR399	-4.54358	0.0296821	-2.30879	0.568667	2.08601	0.299796	-1.34529	DLPE
zma-miR399f-3p	miR399	-4.75347	0.000147054	-1.90496	0.39285	2.51801	0.0109579	-1.16513	DLPE
zma-miR399f-5p	miR399	-4.9526	0.000857741	-0.858318	0.804071	4.07546	0.00791887	-1.12414	DLPE
zma-miR399g-3p	miR399	-2.19748	0.551758	NA	NA	1.29607	0.7452	-1	NoDiff
zma-miR399g-5p	miR399	-2.40219	0.489525	-1.72572	0.671965	0.593848	0.85049	-1.98181	NoDiff
zma-miR399h-3p	miR399	-5.38014	4.02004e-10	-2.49964	0.0606713	2.75273	1.40355e-05	-1.21464	DLPE
zma-miR399h-5p	miR399	-2.97592	0.3157	NA	NA	2.13188	0.513646	-1	NoDiff
zma-miR399i-3p	miR399	-2.4677	4.4094e-07	-0.804298	0.289403	1.54237	0.00518718	-1.23049	DLPE
zma-miR399i-5p	miR399	-6.4194	9.57398e-07	0.162962	0.968143	6.50322	1.38678e-06	-0.976257	DLPE
zma-miR399j-3p	miR399	-2.45097	3.19947e-06	-0.770543	0.385197	1.53047	0.0165161	-1.22509	DLPE
zma-miR399j-5p	miR399	-4.05648	8.33088e-12	-0.994459	0.429162	2.85496	7.29458e-06	-1.0908	DLPE
zma-miR408a	miR408	0.980917	0.182282	-0.143886	0.837698	-1.17874	0.110457	1.59871	NoDiff
zma-miR408b-3p	miR408	1.25943	0.121875	-0.314195	0.68338	-1.63257	0.0339288	1.00462	DHPE
zma-miR408b-5p	miR408	0.0674552	0.962792	-0.670261	0.633372	-0.861782	0.526687	-0.111569	NoDiff
zma-miR528a-3p	miR528	-2.08484	0.38643	-2.72303	0.241632	-0.697632	0.688377	-4.87919	NoDiff
zma-miR528a-5p	miR528	0.156624	0.841457	-0.708613	0.369533	-0.926593	0.226097	-0.509187	NoDiff
zma-miR528b-3p	miR528	0.272902	0.89101	-1.56409	0.320814	-1.92441	0.244341	-0.744395	NoDiff
zma-miR528b-5p	miR528	-0.228068	0.764613	-1.26222	0.0874017	-1.09377	0.121225	-1.34992	NoDiff
zma-miR529-3p	miR529	-0.649623	0.162483	1.90446	0.00442829	2.45285	4.95501e-05	0.266945	AE
zma-miR529-5p	miR529	0.309867	0.318674	1.57723	3.88011e-05	1.15976	0.00180874	2.11224	THPE
zma-miR827-3p	miR827	-1.26088	2.23237e-07	0.980318	0.000158145	2.16656	3.69718e-15	-0.363619	AE
zma-miR827-5p	miR827	-0.980039	0.000125669	0.875285	0.00148368	1.7893	4.59207e-11	-0.241369	AE
zma-miR156c	miR156	-1.54392	0.0882733	-0.19457	0.867943	1.24765	0.207621	-0.934609	NoDiff
zma-miR160e	miR160	0.986169	0.000822382	0.334049	0.302715	-0.737011	0.0154118	4.24272	NoDiff
zma-miR395j-3p	miR395	-1.58145	0.694588	NA	NA	0.722014	0.857708	-1	NoDiff
zma-miR444a	miR444	-0.450328	0.0966967	0.310049	0.236655	0.68033	0.0201421	0.0648766	NoDiff
zma-miR444b	miR444	-0.49839	0.0621427	0.360975	0.191212	0.776546	0.00670325	0.0707928	NoDiff
miR10_124524787	NovelMiRNA	-1.28412	0.750904	NA	NA	0.394676	0.922258	-1	NoDiff
miR2_6276770	NovelMiRNA	-0.602614	0.858198	-1.74817	0.550244	-1.22931	0.641724	-1.55067	NoDiff
miR3_58127907	NovelMiRNA	0.926167	0.158458	0.216044	0.740955	-0.776501	0.302254	3.64886	NoDiff
