# Supplementary material for: Integrated Multi-Omics Reveals Significant Roles of Non-Additively Expressed Small RNAs in Heterosis for Maize Plant Height
Source: Int J Mol Sci. 2023 May 23;24(11):9150. doi: 10.3390/ijms24119150 (PMC10252383; doi:10.3390/ijms24119150)
Supplement: Supplementary file 1 [file ijms-24-09150-s001.zip › Table-S3.xlsx]

## Sheet: New
Table S3. Target genes of miRNAs.
miRNA_Name	miR_Family	Expression_Pattern	Target_Source	Target_GeneID	Degradome_Transcript	Degradome_Category	Degradome_Pval	psRNATarget_Transcript	psRNATarget_Expectation
miR169j-5p	miR169	NoDiff	Predict	Zm00001d000101	NA	NA	NA	Zm00001d000101_T001	2
miR169j-5p	miR169	NoDiff	Predict	Zm00001d003053	NA	NA	NA	Zm00001d003053_T001	3
miR169j-5p	miR169	NoDiff	Predict	Zm00001d003855	NA	NA	NA	Zm00001d003855_T001	2.5
miR169j-5p	miR169	NoDiff	Predict	Zm00001d006835	NA	NA	NA	Zm00001d006835_T006	2
miR169j-5p	miR169	NoDiff	Predict	Zm00001d007912	NA	NA	NA	Zm00001d007912_T013	3
miR169j-5p	miR169	NoDiff	Predict	Zm00001d013676	NA	NA	NA	Zm00001d013676_T003	2
miR169j-5p	miR169	NoDiff	Predict	Zm00001d015299	NA	NA	NA	Zm00001d015299_T001	3
miR169j-5p	miR169	NoDiff	Both	Zm00001d018255	Zm00001d018255_T001	0	0.00028083	Zm00001d018255_T001	2
miR169j-5p	miR169	NoDiff	Predict	Zm00001d022109	NA	NA	NA	Zm00001d022109_T009	2
miR169j-5p	miR169	NoDiff	Predict	Zm00001d027874	NA	NA	NA	Zm00001d027874_T011	2
miR169j-5p	miR169	NoDiff	Predict	Zm00001d029489	NA	NA	NA	Zm00001d029489_T002	2
miR169j-5p	miR169	NoDiff	Predict	Zm00001d031092	NA	NA	NA	Zm00001d031092_T002	2
miR169j-5p	miR169	NoDiff	Predict	Zm00001d031529	NA	NA	NA	Zm00001d031529_T016	3
miR169j-5p	miR169	NoDiff	Predict	Zm00001d033215	NA	NA	NA	Zm00001d033215_T004	2
miR169j-5p	miR169	NoDiff	Predict	Zm00001d033602	NA	NA	NA	Zm00001d033602_T001	2.5
miR169j-5p	miR169	NoDiff	Predict	Zm00001d034640	NA	NA	NA	Zm00001d034640_T018	3
miR169j-5p	miR169	NoDiff	Predict	Zm00001d038675	NA	NA	NA	Zm00001d038675_T276	2
miR169j-5p	miR169	NoDiff	Predict	Zm00001d041914	NA	NA	NA	Zm00001d041914_T003	3
miR169j-5p	miR169	NoDiff	Predict	Zm00001d043837	NA	NA	NA	Zm00001d043837_T001	3
miR169j-5p	miR169	NoDiff	Predict	Zm00001d053986	NA	NA	NA	Zm00001d053986_T001	3
miR399i-5p.5_150574429	miR399	DLPE	Predict	Zm00001d003477	NA	NA	NA	Zm00001d003477_T001	2.5
miR399i-5p.5_150574429	miR399	DLPE	Predict	Zm00001d006283	NA	NA	NA	Zm00001d006283_T001	3
miR399i-5p.5_150574429	miR399	DLPE	Predict	Zm00001d007782	NA	NA	NA	Zm00001d007782_T001	2.5
miR399i-5p.5_150574429	miR399	DLPE	Predict	Zm00001d007802	NA	NA	NA	Zm00001d007802_T001	3
miR399i-5p.5_150574429	miR399	DLPE	Predict	Zm00001d009459	NA	NA	NA	Zm00001d009459_T001	2.5
miR399i-5p.5_150574429	miR399	DLPE	Predict	Zm00001d013794	NA	NA	NA	Zm00001d013794_T001	2.5
miR399i-5p.5_150574429	miR399	DLPE	Predict	Zm00001d014510	NA	NA	NA	Zm00001d014510_T009	3
miR399i-5p.5_150574429	miR399	DLPE	Predict	Zm00001d014511	NA	NA	NA	Zm00001d014511_T009	3
miR399i-5p.5_150574429	miR399	DLPE	Predict	Zm00001d016618	NA	NA	NA	Zm00001d016618_T001	3
miR399i-5p.5_150574429	miR399	DLPE	Predict	Zm00001d018795	NA	NA	NA	Zm00001d018795_T082	3
miR399i-5p.5_150574429	miR399	DLPE	Predict	Zm00001d022446	NA	NA	NA	Zm00001d022446_T001	3
miR399i-5p.5_150574429	miR399	DLPE	Predict	Zm00001d023544	NA	NA	NA	Zm00001d023544_T004	2.5
miR399i-5p.5_150574429	miR399	DLPE	Predict	Zm00001d031070	NA	NA	NA	Zm00001d031070_T009	3
miR399i-5p.5_150574429	miR399	DLPE	Predict	Zm00001d033040	NA	NA	NA	Zm00001d033040_T001	3
miR399i-5p.5_150574429	miR399	DLPE	Predict	Zm00001d042975	NA	NA	NA	Zm00001d042975_T002	3
miR399i-5p.5_150574429	miR399	DLPE	Predict	Zm00001d043366	NA	NA	NA	Zm00001d043366_T001	3
miR399i-5p.5_150574429	miR399	DLPE	Predict	Zm00001d044720	NA	NA	NA	Zm00001d044720_T010	3
miR399i-5p.5_150574429	miR399	DLPE	Predict	Zm00001d051953	NA	NA	NA	Zm00001d051953_T010	3
miR399i-5p.5_150426221	miR399	DLPE	Predict	Zm00001d003477	NA	NA	NA	Zm00001d003477_T001	2.5
miR399i-5p.5_150426221	miR399	DLPE	Predict	Zm00001d006283	NA	NA	NA	Zm00001d006283_T001	3
miR399i-5p.5_150426221	miR399	DLPE	Predict	Zm00001d007782	NA	NA	NA	Zm00001d007782_T001	2.5
miR399i-5p.5_150426221	miR399	DLPE	Predict	Zm00001d007802	NA	NA	NA	Zm00001d007802_T001	3
miR399i-5p.5_150426221	miR399	DLPE	Predict	Zm00001d009459	NA	NA	NA	Zm00001d009459_T001	2.5
miR399i-5p.5_150426221	miR399	DLPE	Predict	Zm00001d013794	NA	NA	NA	Zm00001d013794_T001	2.5
miR399i-5p.5_150426221	miR399	DLPE	Predict	Zm00001d014510	NA	NA	NA	Zm00001d014510_T009	3
miR399i-5p.5_150426221	miR399	DLPE	Predict	Zm00001d014511	NA	NA	NA	Zm00001d014511_T009	3
miR399i-5p.5_150426221	miR399	DLPE	Predict	Zm00001d016618	NA	NA	NA	Zm00001d016618_T001	3
miR399i-5p.5_150426221	miR399	DLPE	Predict	Zm00001d018795	NA	NA	NA	Zm00001d018795_T082	3
miR399i-5p.5_150426221	miR399	DLPE	Predict	Zm00001d022446	NA	NA	NA	Zm00001d022446_T001	3
miR399i-5p.5_150426221	miR399	DLPE	Predict	Zm00001d023544	NA	NA	NA	Zm00001d023544_T004	2.5
miR399i-5p.5_150426221	miR399	DLPE	Predict	Zm00001d031070	NA	NA	NA	Zm00001d031070_T009	3
miR399i-5p.5_150426221	miR399	DLPE	Predict	Zm00001d033040	NA	NA	NA	Zm00001d033040_T001	3
miR399i-5p.5_150426221	miR399	DLPE	Predict	Zm00001d042975	NA	NA	NA	Zm00001d042975_T002	3
miR399i-5p.5_150426221	miR399	DLPE	Predict	Zm00001d043366	NA	NA	NA	Zm00001d043366_T001	3
miR399i-5p.5_150426221	miR399	DLPE	Predict	Zm00001d044720	NA	NA	NA	Zm00001d044720_T010	3
miR399i-5p.5_150426221	miR399	DLPE	Predict	Zm00001d051953	NA	NA	NA	Zm00001d051953_T010	3
miR172e	miR172	NoDiff	Predict	Zm00001d002075	NA	NA	NA	Zm00001d002075_T001	1.5
miR172e	miR172	NoDiff	Predict	Zm00001d008621	NA	NA	NA	Zm00001d008621_T001	3
miR172e	miR172	NoDiff	Predict	Zm00001d010988	NA	NA	NA	Zm00001d010988_T001	0
miR172e	miR172	NoDiff	Predict	Zm00001d019230	NA	NA	NA	Zm00001d019230_T003	0
miR172e	miR172	NoDiff	Predict	Zm00001d023838	NA	NA	NA	Zm00001d023838_T012	3
miR172e	miR172	NoDiff	Predict	Zm00001d026448	NA	NA	NA	Zm00001d026448_T001	1.5
miR172e	miR172	NoDiff	Predict	Zm00001d029664	NA	NA	NA	Zm00001d029664_T014	3
miR172e	miR172	NoDiff	Predict	Zm00001d034629	NA	NA	NA	Zm00001d034629_T005	0
miR172e	miR172	NoDiff	Predict	Zm00001d035512	NA	NA	NA	Zm00001d035512_T004	0
miR172e	miR172	NoDiff	Predict	Zm00001d038373	NA	NA	NA	Zm00001d038373_T003	3
miR172e	miR172	NoDiff	Predict	Zm00001d039858	NA	NA	NA	Zm00001d039858_T001	3
miR172e	miR172	NoDiff	Predict	Zm00001d046621	NA	NA	NA	Zm00001d046621_T001	0
miR172e	miR172	NoDiff	Predict	Zm00001d047327	NA	NA	NA	Zm00001d047327_T001	3
miR167i-3p	miR167	NoDiff	Predict	Zm00001d014256	NA	NA	NA	Zm00001d014256_T003	3
miR167i-3p	miR167	NoDiff	Predict	Zm00001d015839	NA	NA	NA	Zm00001d015839_T002	2.5
miR167i-3p	miR167	NoDiff	Predict	Zm00001d017024	NA	NA	NA	Zm00001d017024_T001	3
miR167i-3p	miR167	NoDiff	Predict	Zm00001d020101	NA	NA	NA	Zm00001d020101_T001	3
miR167i-3p	miR167	NoDiff	Predict	Zm00001d026239	NA	NA	NA	Zm00001d026239_T006	3
miR167i-3p	miR167	NoDiff	Predict	Zm00001d031351	NA	NA	NA	Zm00001d031351_T001	3
miR167i-3p	miR167	NoDiff	Predict	Zm00001d033051	NA	NA	NA	Zm00001d033051_T002	3
miR167i-3p	miR167	NoDiff	Predict	Zm00001d033139	NA	NA	NA	Zm00001d033139_T001	3
miR167i-3p	miR167	NoDiff	Predict	Zm00001d034405	NA	NA	NA	Zm00001d034405_T007	3
miR167i-3p	miR167	NoDiff	Predict	Zm00001d034902	NA	NA	NA	Zm00001d034902_T003	3
miR167i-3p	miR167	NoDiff	Predict	Zm00001d034903	NA	NA	NA	Zm00001d034903_T004	3
miR167i-3p	miR167	NoDiff	Predict	Zm00001d038274	NA	NA	NA	Zm00001d038274_T002	3
miR167j-5p	miR167	NoDiff	Both	Zm00001d001879	Zm00001d001879_T021	2	0.0300975	Zm00001d001879_T006	2.5
miR167j-5p	miR167	NoDiff	Predict	Zm00001d003316	NA	NA	NA	Zm00001d003316_T001	2.5
miR167j-5p	miR167	NoDiff	Predict	Zm00001d008611	NA	NA	NA	Zm00001d008611_T007	3
miR167j-5p	miR167	NoDiff	Predict	Zm00001d014377	NA	NA	NA	Zm00001d014377_T002	2.5
miR167j-5p	miR167	NoDiff	Both	Zm00001d026590	Zm00001d026590_T031	0	0.007276	Zm00001d026590_T014	2.5
miR167j-5p	miR167	NoDiff	Degradome	Zm00001d030133	Zm00001d030133_T002	1	0.0258488	NA	NA
miR167j-5p	miR167	NoDiff	Predict	Zm00001d031064	NA	NA	NA	Zm00001d031064_T006	2.5
miR167j-5p	miR167	NoDiff	Predict	Zm00001d036593	NA	NA	NA	Zm00001d036593_T001	2.5
miR167j-5p	miR167	NoDiff	Predict	Zm00001d041497	NA	NA	NA	Zm00001d041497_T027	2.5
miR167j-5p	miR167	NoDiff	Predict	Zm00001d046604	NA	NA	NA	Zm00001d046604_T001	3
miR167j-5p	miR167	NoDiff	Predict	Zm00001d046610	NA	NA	NA	Zm00001d046610_T001	3
miR167j-5p	miR167	NoDiff	Predict	Zm00001d051832	NA	NA	NA	Zm00001d051832_T001	3
miR167j-5p	miR167	NoDiff	Predict	Zm00001d053819	NA	NA	NA	Zm00001d053819_T005	2.5
miR169p-5p.4_185272328	miR169	NoDiff	Predict	Zm00001d000101	NA	NA	NA	Zm00001d000101_T001	2
miR169p-5p.4_185272328	miR169	NoDiff	Predict	Zm00001d003053	NA	NA	NA	Zm00001d003053_T001	3
miR169p-5p.4_185272328	miR169	NoDiff	Predict	Zm00001d003855	NA	NA	NA	Zm00001d003855_T001	2.5
miR169p-5p.4_185272328	miR169	NoDiff	Predict	Zm00001d006835	NA	NA	NA	Zm00001d006835_T006	2
miR169p-5p.4_185272328	miR169	NoDiff	Predict	Zm00001d007912	NA	NA	NA	Zm00001d007912_T013	3
miR169p-5p.4_185272328	miR169	NoDiff	Predict	Zm00001d013676	NA	NA	NA	Zm00001d013676_T003	2
miR169p-5p.4_185272328	miR169	NoDiff	Predict	Zm00001d015299	NA	NA	NA	Zm00001d015299_T001	3
miR169p-5p.4_185272328	miR169	NoDiff	Predict	Zm00001d018255	NA	NA	NA	Zm00001d018255_T001	2
miR169p-5p.4_185272328	miR169	NoDiff	Predict	Zm00001d022109	NA	NA	NA	Zm00001d022109_T009	2
miR169p-5p.4_185272328	miR169	NoDiff	Both	Zm00001d027874	Zm00001d027874_T007	0	0.00252463	Zm00001d027874_T011	2
miR169p-5p.4_185272328	miR169	NoDiff	Predict	Zm00001d029489	NA	NA	NA	Zm00001d029489_T002	2
miR169p-5p.4_185272328	miR169	NoDiff	Predict	Zm00001d031092	NA	NA	NA	Zm00001d031092_T002	2
miR169p-5p.4_185272328	miR169	NoDiff	Predict	Zm00001d031529	NA	NA	NA	Zm00001d031529_T016	3
miR169p-5p.4_185272328	miR169	NoDiff	Predict	Zm00001d033215	NA	NA	NA	Zm00001d033215_T004	2
miR169p-5p.4_185272328	miR169	NoDiff	Predict	Zm00001d033602	NA	NA	NA	Zm00001d033602_T001	2.5
miR169p-5p.4_185272328	miR169	NoDiff	Predict	Zm00001d034640	NA	NA	NA	Zm00001d034640_T018	3
miR169p-5p.4_185272328	miR169	NoDiff	Predict	Zm00001d038675	NA	NA	NA	Zm00001d038675_T276	2
miR169p-5p.4_185272328	miR169	NoDiff	Predict	Zm00001d041914	NA	NA	NA	Zm00001d041914_T003	3
miR169p-5p.4_185272328	miR169	NoDiff	Predict	Zm00001d043837	NA	NA	NA	Zm00001d043837_T001	3
miR169p-5p.4_185272328	miR169	NoDiff	Predict	Zm00001d053986	NA	NA	NA	Zm00001d053986_T001	3
miR166m-3p	miR166	NoDiff	Predict	Zm00001d008869	NA	NA	NA	Zm00001d008869_T001	1
miR166m-3p	miR166	NoDiff	Predict	Zm00001d013699	NA	NA	NA	Zm00001d013699_T001	1
miR166m-3p	miR166	NoDiff	Predict	Zm00001d014252	NA	NA	NA	Zm00001d014252_T001	1
miR166m-3p	miR166	NoDiff	Predict	Zm00001d017590	NA	NA	NA	Zm00001d017590_T001	3
miR166m-3p	miR166	NoDiff	Predict	Zm00001d018824	NA	NA	NA	Zm00001d018824_T001	1.5
miR166m-3p	miR166	NoDiff	Predict	Zm00001d024060	NA	NA	NA	Zm00001d024060_T001	2
miR166m-3p	miR166	NoDiff	Predict	Zm00001d025050	NA	NA	NA	Zm00001d025050_T003	3
miR166m-3p	miR166	NoDiff	Predict	Zm00001d026307	NA	NA	NA	Zm00001d026307_T001	3
miR166m-3p	miR166	NoDiff	Predict	Zm00001d026325	NA	NA	NA	Zm00001d026325_T001	1
miR166m-3p	miR166	NoDiff	Both	Zm00001d027317	Zm00001d027317_T008	0	0.000561581	Zm00001d027317_T032	1
miR166m-3p	miR166	NoDiff	Predict	Zm00001d031061	NA	NA	NA	Zm00001d031061_T009	1
miR166m-3p	miR166	NoDiff	Predict	Zm00001d032681	NA	NA	NA	Zm00001d032681_T003	1
miR166m-3p	miR166	NoDiff	Predict	Zm00001d033246	NA	NA	NA	Zm00001d033246_T003	1
miR166m-3p	miR166	NoDiff	Both	Zm00001d041489	Zm00001d041489_T006	0	0.00280475	Zm00001d041489_T008	1
miR166m-3p	miR166	NoDiff	Both	Zm00001d048527	Zm00001d048527_T023	0	0.00028083	Zm00001d048527_T022	1
miR166m-3p	miR166	NoDiff	Predict	Zm00001d051851	NA	NA	NA	Zm00001d051851_T001	1.5
miR166m-5p	miR166	NoDiff	Predict	Zm00001d004951	NA	NA	NA	Zm00001d004951_T001	2.5
miR166m-5p	miR166	NoDiff	Predict	Zm00001d006293	NA	NA	NA	Zm00001d006293_T020	3
miR166m-5p	miR166	NoDiff	Degradome	Zm00001d012938	Zm00001d012938_T002	4	0.0421047	NA	NA
miR166m-5p	miR166	NoDiff	Predict	Zm00001d013063	NA	NA	NA	Zm00001d013063_T001	3
miR166m-5p	miR166	NoDiff	Predict	Zm00001d017387	NA	NA	NA	Zm00001d017387_T004	3
miR166m-5p	miR166	NoDiff	Predict	Zm00001d017580	NA	NA	NA	Zm00001d017580_T001	1.5
miR166m-5p	miR166	NoDiff	Predict	Zm00001d018577	NA	NA	NA	Zm00001d018577_T001	1.5
miR166m-5p	miR166	NoDiff	Predict	Zm00001d018784	NA	NA	NA	Zm00001d018784_T001	3
miR166m-5p	miR166	NoDiff	Predict	Zm00001d019853	NA	NA	NA	Zm00001d019853_T001	3
miR166m-5p	miR166	NoDiff	Predict	Zm00001d021442	NA	NA	NA	Zm00001d021442_T018	2.5
miR166m-5p	miR166	NoDiff	Predict	Zm00001d024665	NA	NA	NA	Zm00001d024665_T001	2.5
miR166m-5p	miR166	NoDiff	Predict	Zm00001d026434	NA	NA	NA	Zm00001d026434_T002	3
miR166m-5p	miR166	NoDiff	Predict	Zm00001d028566	NA	NA	NA	Zm00001d028566_T003	3
miR166m-5p	miR166	NoDiff	Predict	Zm00001d029810	NA	NA	NA	Zm00001d029810_T001	3
miR166m-5p	miR166	NoDiff	Predict	Zm00001d034257	NA	NA	NA	Zm00001d034257_T001	2.5
miR166m-5p	miR166	NoDiff	Predict	Zm00001d035058	NA	NA	NA	Zm00001d035058_T001	1.5
miR166m-5p	miR166	NoDiff	Predict	Zm00001d035704	NA	NA	NA	Zm00001d035704_T002	2.5
miR166m-5p	miR166	NoDiff	Predict	Zm00001d037641	NA	NA	NA	Zm00001d037641_T001	3
miR166m-5p	miR166	NoDiff	Predict	Zm00001d041558	NA	NA	NA	Zm00001d041558_T001	1.5
miR166m-5p	miR166	NoDiff	Predict	Zm00001d042927	NA	NA	NA	Zm00001d042927_T001	3
miR166m-5p	miR166	NoDiff	Predict	Zm00001d045332	NA	NA	NA	Zm00001d045332_T001	1.5
miR166m-5p	miR166	NoDiff	Predict	Zm00001d050052	NA	NA	NA	Zm00001d050052_T001	1.5
miR166m-5p	miR166	NoDiff	Predict	Zm00001d051179	NA	NA	NA	Zm00001d051179_T001	1.5
miR166m-5p	miR166	NoDiff	Predict	Zm00001d053865	NA	NA	NA	Zm00001d053865_T007	3
miR166m-5p	miR166	NoDiff	Predict	Zm00001d053866	NA	NA	NA	Zm00001d053866_T001	3
miR156l-5p	miR156	NoDiff	Predict	Zm00001d006028	NA	NA	NA	Zm00001d006028_T001	1
miR156l-5p	miR156	NoDiff	Predict	Zm00001d006091	NA	NA	NA	Zm00001d006091_T001	1
miR156l-5p	miR156	NoDiff	Predict	Zm00001d006451	NA	NA	NA	Zm00001d006451_T001	1
miR156l-5p	miR156	NoDiff	Predict	Zm00001d007065	NA	NA	NA	Zm00001d007065_T029	2.5
miR156l-5p	miR156	NoDiff	Predict	Zm00001d012015	NA	NA	NA	Zm00001d012015_T001	1
miR156l-5p	miR156	NoDiff	Predict	Zm00001d013075	NA	NA	NA	Zm00001d013075_T007	3
miR156l-5p	miR156	NoDiff	Predict	Zm00001d013757	NA	NA	NA	Zm00001d013757_T004	3
miR156l-5p	miR156	NoDiff	Predict	Zm00001d014698	NA	NA	NA	Zm00001d014698_T006	1
miR156l-5p	miR156	NoDiff	Predict	Zm00001d015233	NA	NA	NA	Zm00001d015233_T005	1
miR156l-5p	miR156	NoDiff	Predict	Zm00001d015410	NA	NA	NA	Zm00001d015410_T003	1
miR156l-5p	miR156	NoDiff	Predict	Zm00001d020728	NA	NA	NA	Zm00001d020728_T016	3
miR156l-5p	miR156	NoDiff	Predict	Zm00001d020941	NA	NA	NA	Zm00001d020941_T001	1
miR156l-5p	miR156	NoDiff	Predict	Zm00001d021056	NA	NA	NA	Zm00001d021056_T001	1
miR156l-5p	miR156	NoDiff	Predict	Zm00001d021573	NA	NA	NA	Zm00001d021573_T002	1
miR156l-5p	miR156	NoDiff	Predict	Zm00001d024212	NA	NA	NA	Zm00001d024212_T011	3
miR156l-5p	miR156	NoDiff	Predict	Zm00001d026175	NA	NA	NA	Zm00001d026175_T001	1
miR156l-5p	miR156	NoDiff	Both	Zm00001d031451	Zm00001d031451_T001	0	0.000561581	Zm00001d031451_T001	1
miR156l-5p	miR156	NoDiff	Predict	Zm00001d032575	NA	NA	NA	Zm00001d032575_T008	3
miR156l-5p	miR156	NoDiff	Predict	Zm00001d035254	NA	NA	NA	Zm00001d035254_T003	3
miR156l-5p	miR156	NoDiff	Predict	Zm00001d036507	NA	NA	NA	Zm00001d036507_T038	2.5
miR156l-5p	miR156	NoDiff	Predict	Zm00001d039900	NA	NA	NA	Zm00001d039900_T003	1.5
miR156l-5p	miR156	NoDiff	Predict	Zm00001d041923	NA	NA	NA	Zm00001d041923_T002	3
miR156l-5p	miR156	NoDiff	Predict	Zm00001d042319	NA	NA	NA	Zm00001d042319_T001	1
miR156l-5p	miR156	NoDiff	Predict	Zm00001d044274	NA	NA	NA	Zm00001d044274_T002	3
miR156l-5p	miR156	NoDiff	Predict	Zm00001d044593	NA	NA	NA	Zm00001d044593_T018	3
miR156l-5p	miR156	NoDiff	Predict	Zm00001d046942	NA	NA	NA	Zm00001d046942_T001	2.5
miR156l-5p	miR156	NoDiff	Predict	Zm00001d047540	NA	NA	NA	Zm00001d047540_T005	1.5
miR156l-5p	miR156	NoDiff	Predict	Zm00001d048007	NA	NA	NA	Zm00001d048007_T002	3
miR156l-5p	miR156	NoDiff	Predict	Zm00001d049165	NA	NA	NA	Zm00001d049165_T001	1
miR156l-5p	miR156	NoDiff	Predict	Zm00001d049822	NA	NA	NA	Zm00001d049822_T001	1
miR156l-5p	miR156	NoDiff	Predict	Zm00001d049824	NA	NA	NA	Zm00001d049824_T002	1
miR156l-5p	miR156	NoDiff	Predict	Zm00001d052071	NA	NA	NA	Zm00001d052071_T002	2.5
miR156l-5p	miR156	NoDiff	Predict	Zm00001d052890	NA	NA	NA	Zm00001d052890_T001	1
miR156l-5p	miR156	NoDiff	Predict	Zm00001d052906	NA	NA	NA	Zm00001d052906_T001	3
miR156l-5p	miR156	NoDiff	Predict	Zm00001d053775	NA	NA	NA	Zm00001d053775_T001	1
miR156l-5p	miR156	NoDiff	Predict	Zm00001d053890	NA	NA	NA	Zm00001d053890_T006	1
miR395o-5p	miR395	NoDiff	Predict	Zm00001d000226	NA	NA	NA	Zm00001d000226_T007	2.5
miR395o-5p	miR395	NoDiff	Predict	Zm00001d003864	NA	NA	NA	Zm00001d003864_T001	2.5
miR395o-5p	miR395	NoDiff	Predict	Zm00001d008983	NA	NA	NA	Zm00001d008983_T013	3
miR395o-5p	miR395	NoDiff	Predict	Zm00001d011253	NA	NA	NA	Zm00001d011253_T008	2.5
miR395o-5p	miR395	NoDiff	Predict	Zm00001d012278	NA	NA	NA	Zm00001d012278_T001	2.5
miR395o-5p	miR395	NoDiff	Predict	Zm00001d018512	NA	NA	NA	Zm00001d018512_T002	3
miR395o-5p	miR395	NoDiff	Predict	Zm00001d019387	NA	NA	NA	Zm00001d019387_T001	3
miR395o-5p	miR395	NoDiff	Predict	Zm00001d025039	NA	NA	NA	Zm00001d025039_T001	2.5
miR395o-5p	miR395	NoDiff	Predict	Zm00001d025300	NA	NA	NA	Zm00001d025300_T007	2.5
miR395o-5p	miR395	NoDiff	Predict	Zm00001d034368	NA	NA	NA	Zm00001d034368_T001	2.5
miR395o-5p	miR395	NoDiff	Predict	Zm00001d039427	NA	NA	NA	Zm00001d039427_T001	3
miR395o-5p	miR395	NoDiff	Predict	Zm00001d040061	NA	NA	NA	Zm00001d040061_T001	3
miR395o-5p	miR395	NoDiff	Predict	Zm00001d042590	NA	NA	NA	Zm00001d042590_T001	3
miR395o-5p	miR395	NoDiff	Predict	Zm00001d042923	NA	NA	NA	Zm00001d042923_T001	3
miR395o-5p	miR395	NoDiff	Predict	Zm00001d043522	NA	NA	NA	Zm00001d043522_T002	2.5
miR395o-5p	miR395	NoDiff	Predict	Zm00001d045109	NA	NA	NA	Zm00001d045109_T037	3
miR395o-5p	miR395	NoDiff	Predict	Zm00001d045557	NA	NA	NA	Zm00001d045557_T004	2.5
miR395o-5p	miR395	NoDiff	Predict	Zm00001d047637	NA	NA	NA	Zm00001d047637_T001	2.5
miR395o-5p	miR395	NoDiff	Predict	Zm00001d048944	NA	NA	NA	Zm00001d048944_T004	2
miR395p-3p	miR395	NoDiff	Predict	Zm00001d002435	NA	NA	NA	Zm00001d002435_T001	3
miR395p-3p	miR395	NoDiff	Predict	Zm00001d005372	NA	NA	NA	Zm00001d005372_T001	3
miR395p-3p	miR395	NoDiff	Predict	Zm00001d013296	NA	NA	NA	Zm00001d013296_T001	1.5
miR395p-3p	miR395	NoDiff	Predict	Zm00001d018439	NA	NA	NA	Zm00001d018439_T005	2.5
miR395p-3p	miR395	NoDiff	Predict	Zm00001d019473	NA	NA	NA	Zm00001d019473_T001	3
miR395p-3p	miR395	NoDiff	Predict	Zm00001d021954	NA	NA	NA	Zm00001d021954_T008	3
miR395p-3p	miR395	NoDiff	Predict	Zm00001d021961	NA	NA	NA	Zm00001d021961_T001	3
miR395p-3p	miR395	NoDiff	Predict	Zm00001d025075	NA	NA	NA	Zm00001d025075_T001	2.5
miR395p-3p	miR395	NoDiff	Predict	Zm00001d028164	NA	NA	NA	Zm00001d028164_T001	1
miR395p-3p	miR395	NoDiff	Predict	Zm00001d028641	NA	NA	NA	Zm00001d028641_T003	2.5
miR395p-3p	miR395	NoDiff	Predict	Zm00001d029976	NA	NA	NA	Zm00001d029976_T008	3
miR395p-3p	miR395	NoDiff	Predict	Zm00001d030614	NA	NA	NA	Zm00001d030614_T010	3
miR395p-3p	miR395	NoDiff	Both	Zm00001d033981	Zm00001d033981_T001	3	0.0456492	Zm00001d033981_T001	1
miR395p-3p	miR395	NoDiff	Predict	Zm00001d034717	NA	NA	NA	Zm00001d034717_T002	3
miR395p-3p	miR395	NoDiff	Predict	Zm00001d037471	NA	NA	NA	Zm00001d037471_T001	3
miR395p-3p	miR395	NoDiff	Predict	Zm00001d038144	NA	NA	NA	Zm00001d038144_T001	2.5
miR395p-3p	miR395	NoDiff	Predict	Zm00001d047015	NA	NA	NA	Zm00001d047015_T016	3
miR395p-3p	miR395	NoDiff	Predict	Zm00001d048308	NA	NA	NA	Zm00001d048308_T002	3
miR395p-3p	miR395	NoDiff	Predict	Zm00001d048540	NA	NA	NA	Zm00001d048540_T001	3
miR395p-5p	miR395	NoDiff	Predict	Zm00001d005501	NA	NA	NA	Zm00001d005501_T003	2.5
miR395p-5p	miR395	NoDiff	Predict	Zm00001d009270	NA	NA	NA	Zm00001d009270_T007	2.5
miR395p-5p	miR395	NoDiff	Predict	Zm00001d033751	NA	NA	NA	Zm00001d033751_T002	2.5
miR395p-5p	miR395	NoDiff	Predict	Zm00001d035731	NA	NA	NA	Zm00001d035731_T019	3
miR395p-5p	miR395	NoDiff	Predict	Zm00001d042287	NA	NA	NA	Zm00001d042287_T002	2.5
miR395p-5p	miR395	NoDiff	Predict	Zm00001d042864	NA	NA	NA	Zm00001d042864_T004	3
miR395p-5p	miR395	NoDiff	Predict	Zm00001d045109	NA	NA	NA	Zm00001d045109_T037	3
miR395p-5p	miR395	NoDiff	Predict	Zm00001d049313	NA	NA	NA	Zm00001d049313_T003	2.5
miR395p-5p	miR395	NoDiff	Predict	Zm00001d050960	NA	NA	NA	Zm00001d050960_T001	3
miR160f-3p	miR160	NoDiff	Predict	Zm00001d002275	NA	NA	NA	Zm00001d002275_T029	2.5
miR160f-3p	miR160	NoDiff	Predict	Zm00001d003712	NA	NA	NA	Zm00001d003712_T001	2.5
miR160f-3p	miR160	NoDiff	Predict	Zm00001d010478	NA	NA	NA	Zm00001d010478_T001	3
miR160f-3p	miR160	NoDiff	Predict	Zm00001d011712	NA	NA	NA	Zm00001d011712_T001	3
miR160f-3p	miR160	NoDiff	Predict	Zm00001d013268	NA	NA	NA	Zm00001d013268_T005	3
miR160f-3p	miR160	NoDiff	Predict	Zm00001d016031	NA	NA	NA	Zm00001d016031_T001	2.5
miR160f-3p	miR160	NoDiff	Predict	Zm00001d033792	NA	NA	NA	Zm00001d033792_T001	3
miR160f-3p	miR160	NoDiff	Predict	Zm00001d035509	NA	NA	NA	Zm00001d035509_T001	3
miR160f-3p	miR160	NoDiff	Predict	Zm00001d038114	NA	NA	NA	Zm00001d038114_T004	3
miR160g-5p	miR160	THPE	Both	Zm00001d000358	Zm00001d000358_T001	0	0.00308479	Zm00001d000358_T001	0
miR160g-5p	miR160	THPE	Predict	Zm00001d002929	NA	NA	NA	Zm00001d002929_T001	0.5
miR160g-5p	miR160	THPE	Predict	Zm00001d003786	NA	NA	NA	Zm00001d003786_T001	2.5
miR160g-5p	miR160	THPE	Predict	Zm00001d003791	NA	NA	NA	Zm00001d003791_T001	2.5
miR160g-5p	miR160	THPE	Predict	Zm00001d003794	NA	NA	NA	Zm00001d003794_T001	2.5
miR160g-5p	miR160	THPE	Predict	Zm00001d011975	NA	NA	NA	Zm00001d011975_T004	3
miR160g-5p	miR160	THPE	Both	Zm00001d014013	Zm00001d014013_T004	0	0.00028083	Zm00001d014013_T001	0
miR160g-5p	miR160	THPE	Both	Zm00001d014507	Zm00001d014507_T004	0	0.000561581	Zm00001d014507_T002	0
miR160g-5p	miR160	THPE	Predict	Zm00001d016877	NA	NA	NA	Zm00001d016877_T003	3
miR160g-5p	miR160	THPE	Both	Zm00001d017284	Zm00001d017284_T001	0	0.00560164	Zm00001d017284_T001	1
miR160g-5p	miR160	THPE	Predict	Zm00001d022581	NA	NA	NA	Zm00001d022581_T001	3
miR160g-5p	miR160	THPE	Predict	Zm00001d025012	NA	NA	NA	Zm00001d025012_T001	3
miR160g-5p	miR160	THPE	Predict	Zm00001d025021	NA	NA	NA	Zm00001d025021_T001	3
miR160g-5p	miR160	THPE	Predict	Zm00001d025225	NA	NA	NA	Zm00001d025225_T001	3
miR160g-5p	miR160	THPE	Predict	Zm00001d025871	NA	NA	NA	Zm00001d025871_T001	0
miR160g-5p	miR160	THPE	Predict	Zm00001d032683	NA	NA	NA	Zm00001d032683_T001	0
miR160g-5p	miR160	THPE	Predict	Zm00001d034282	NA	NA	NA	Zm00001d034282_T001	3
miR160g-5p	miR160	THPE	Predict	Zm00001d035960	NA	NA	NA	Zm00001d035960_T029	3
miR160g-5p	miR160	THPE	Predict	Zm00001d050238	NA	NA	NA	Zm00001d050238_T001	3
miR160g-5p	miR160	THPE	Both	Zm00001d051172	Zm00001d051172_T001	0	0.00588089	Zm00001d051172_T001	1
miR166a-3p	miR166	NoDiff	Predict	Zm00001d008869	NA	NA	NA	Zm00001d008869_T001	1
miR166a-3p	miR166	NoDiff	Both	Zm00001d013699	Zm00001d013699_T001	0	0.00560164	Zm00001d013699_T001	1
miR166a-3p	miR166	NoDiff	Predict	Zm00001d014252	NA	NA	NA	Zm00001d014252_T002	1
miR166a-3p	miR166	NoDiff	Predict	Zm00001d017590	NA	NA	NA	Zm00001d017590_T001	3
miR166a-3p	miR166	NoDiff	Predict	Zm00001d018824	NA	NA	NA	Zm00001d018824_T001	1.5
miR166a-3p	miR166	NoDiff	Predict	Zm00001d024060	NA	NA	NA	Zm00001d024060_T001	2
miR166a-3p	miR166	NoDiff	Predict	Zm00001d025050	NA	NA	NA	Zm00001d025050_T002	3
miR166a-3p	miR166	NoDiff	Predict	Zm00001d026307	NA	NA	NA	Zm00001d026307_T001	3
miR166a-3p	miR166	NoDiff	Predict	Zm00001d026325	NA	NA	NA	Zm00001d026325_T001	1
miR166a-3p	miR166	NoDiff	Predict	Zm00001d027317	NA	NA	NA	Zm00001d027317_T003	1
miR166a-3p	miR166	NoDiff	Both	Zm00001d031061	Zm00001d031061_T009	0	0.000842253	Zm00001d031061_T001	1
miR166a-3p	miR166	NoDiff	Predict	Zm00001d032681	NA	NA	NA	Zm00001d032681_T004	1
miR166a-3p	miR166	NoDiff	Predict	Zm00001d033246	NA	NA	NA	Zm00001d033246_T004	1
miR166a-3p	miR166	NoDiff	Degradome	Zm00001d037713	Zm00001d037713_T002	0	0.0263297	NA	NA
miR166a-3p	miR166	NoDiff	Both	Zm00001d041489	Zm00001d041489_T001	0	0.00112285	Zm00001d041489_T005	1
miR166a-3p	miR166	NoDiff	Predict	Zm00001d048527	NA	NA	NA	Zm00001d048527_T004	1
miR166a-3p	miR166	NoDiff	Predict	Zm00001d051851	NA	NA	NA	Zm00001d051851_T002	1.5
miR166a-5p	miR166	NoDiff	Predict	Zm00001d002029	NA	NA	NA	Zm00001d002029_T001	3
miR166a-5p	miR166	NoDiff	Predict	Zm00001d004230	NA	NA	NA	Zm00001d004230_T043	2.5
miR166a-5p	miR166	NoDiff	Predict	Zm00001d012323	NA	NA	NA	Zm00001d012323_T003	3
miR166a-5p	miR166	NoDiff	Predict	Zm00001d014191	NA	NA	NA	Zm00001d014191_T001	2.5
miR166a-5p	miR166	NoDiff	Predict	Zm00001d014475	NA	NA	NA	Zm00001d014475_T001	3
miR166a-5p	miR166	NoDiff	Predict	Zm00001d015599	NA	NA	NA	Zm00001d015599_T001	3
miR166a-5p	miR166	NoDiff	Predict	Zm00001d017273	NA	NA	NA	Zm00001d017273_T001	3
miR166a-5p	miR166	NoDiff	Predict	Zm00001d017518	NA	NA	NA	Zm00001d017518_T001	2.5
miR166a-5p	miR166	NoDiff	Predict	Zm00001d018876	NA	NA	NA	Zm00001d018876_T001	2.5
miR166a-5p	miR166	NoDiff	Predict	Zm00001d019036	NA	NA	NA	Zm00001d019036_T073	3
miR166a-5p	miR166	NoDiff	Predict	Zm00001d021382	NA	NA	NA	Zm00001d021382_T003	3
miR166a-5p	miR166	NoDiff	Predict	Zm00001d026386	NA	NA	NA	Zm00001d026386_T008	3
miR166a-5p	miR166	NoDiff	Predict	Zm00001d029566	NA	NA	NA	Zm00001d029566_T003	3
miR166a-5p	miR166	NoDiff	Predict	Zm00001d029839	NA	NA	NA	Zm00001d029839_T003	3
miR166a-5p	miR166	NoDiff	Predict	Zm00001d031104	NA	NA	NA	Zm00001d031104_T011	3
miR166a-5p	miR166	NoDiff	Predict	Zm00001d034493	NA	NA	NA	Zm00001d034493_T001	2
miR166a-5p	miR166	NoDiff	Predict	Zm00001d035554	NA	NA	NA	Zm00001d035554_T001	3
miR166a-5p	miR166	NoDiff	Predict	Zm00001d037734	NA	NA	NA	Zm00001d037734_T005	2
miR166a-5p	miR166	NoDiff	Predict	Zm00001d044689	NA	NA	NA	Zm00001d044689_T007	3
miR166a-5p	miR166	NoDiff	Predict	Zm00001d047940	NA	NA	NA	Zm00001d047940_T008	3
miR166a-5p	miR166	NoDiff	Predict	Zm00001d049599	NA	NA	NA	Zm00001d049599_T001	2.5
miR166a-5p	miR166	NoDiff	Predict	Zm00001d049856	NA	NA	NA	Zm00001d049856_T002	2
miR169d	miR169	NoDiff	Predict	Zm00001d001929	NA	NA	NA	Zm00001d001929_T002	3
miR169d	miR169	NoDiff	Predict	Zm00001d011522	NA	NA	NA	Zm00001d011522_T001	3
miR169d	miR169	NoDiff	Predict	Zm00001d011790	NA	NA	NA	Zm00001d011790_T002	3
miR169d	miR169	NoDiff	Predict	Zm00001d011849	NA	NA	NA	Zm00001d011849_T003	3
miR169d	miR169	NoDiff	Predict	Zm00001d023258	NA	NA	NA	Zm00001d023258_T001	3
miR169d	miR169	NoDiff	Predict	Zm00001d026547	NA	NA	NA	Zm00001d026547_T001	3
miR169d	miR169	NoDiff	Predict	Zm00001d030675	NA	NA	NA	Zm00001d030675_T002	2.5
miR169d	miR169	NoDiff	Predict	Zm00001d032282	NA	NA	NA	Zm00001d032282_T005	3
miR169d	miR169	NoDiff	Predict	Zm00001d038642	NA	NA	NA	Zm00001d038642_T001	2
miR169d	miR169	NoDiff	Predict	Zm00001d039254	NA	NA	NA	Zm00001d039254_T001	2
miR169d	miR169	NoDiff	Predict	Zm00001d053285	NA	NA	NA	Zm00001d053285_T001	3
miR169d	miR169	NoDiff	Predict	Zm00001d053912	NA	NA	NA	Zm00001d053912_T001	3
miR399j-3p	miR399	NoDiff	Predict	Zm00001d007093	NA	NA	NA	Zm00001d007093_T012	3
miR399j-3p	miR399	NoDiff	Predict	Zm00001d007630	NA	NA	NA	Zm00001d007630_T004	3
miR399j-3p	miR399	NoDiff	Predict	Zm00001d008805	NA	NA	NA	Zm00001d008805_T001	3
miR399j-3p	miR399	NoDiff	Predict	Zm00001d017937	NA	NA	NA	Zm00001d017937_T004	3
miR399j-3p	miR399	NoDiff	Predict	Zm00001d032379	NA	NA	NA	Zm00001d032379_T005	3
miR399j-3p	miR399	NoDiff	Both	Zm00001d038972	Zm00001d038972_T019	2	0.0300975	Zm00001d038972_T022	0
miR399j-3p	miR399	NoDiff	Predict	Zm00001d053563	NA	NA	NA	Zm00001d053563_T005	3
miR396h	miR396	NoDiff	Predict	Zm00001d004557	NA	NA	NA	Zm00001d004557_T007	2.5
miR396h	miR396	NoDiff	Predict	Zm00001d007441	NA	NA	NA	Zm00001d007441_T002	2.5
miR396h	miR396	NoDiff	Predict	Zm00001d009771	NA	NA	NA	Zm00001d009771_T006	2.5
miR396h	miR396	NoDiff	Predict	Zm00001d009848	NA	NA	NA	Zm00001d009848_T001	2.5
miR396h	miR396	NoDiff	Predict	Zm00001d013029	NA	NA	NA	Zm00001d013029_T002	2.5
miR396h	miR396	NoDiff	Predict	Zm00001d014180	NA	NA	NA	Zm00001d014180_T012	3
miR396h	miR396	NoDiff	Predict	Zm00001d014489	NA	NA	NA	Zm00001d014489_T007	3
miR396h	miR396	NoDiff	Predict	Zm00001d014761	NA	NA	NA	Zm00001d014761_T002	3
miR396h	miR396	NoDiff	Predict	Zm00001d018657	NA	NA	NA	Zm00001d018657_T054	3
miR396h	miR396	NoDiff	Predict	Zm00001d019371	NA	NA	NA	Zm00001d019371_T001	3
miR396h	miR396	NoDiff	Predict	Zm00001d024677	NA	NA	NA	Zm00001d024677_T006	3
miR396h	miR396	NoDiff	Predict	Zm00001d024947	NA	NA	NA	Zm00001d024947_T009	2.5
miR396h	miR396	NoDiff	Predict	Zm00001d025816	NA	NA	NA	Zm00001d025816_T003	2.5
miR396h	miR396	NoDiff	Predict	Zm00001d029189	NA	NA	NA	Zm00001d029189_T002	2.5
miR396h	miR396	NoDiff	Predict	Zm00001d031008	NA	NA	NA	Zm00001d031008_T002	3
miR396h	miR396	NoDiff	Predict	Zm00001d033422	NA	NA	NA	Zm00001d033422_T005	2.5
miR396h	miR396	NoDiff	Predict	Zm00001d035143	NA	NA	NA	Zm00001d035143_T001	2.5
miR396h	miR396	NoDiff	Predict	Zm00001d035145	NA	NA	NA	Zm00001d035145_T001	2.5
miR396h	miR396	NoDiff	Predict	Zm00001d037271	NA	NA	NA	Zm00001d037271_T001	3
miR396h	miR396	NoDiff	Predict	Zm00001d037856	NA	NA	NA	Zm00001d037856_T002	3
miR396h	miR396	NoDiff	Predict	Zm00001d040678	NA	NA	NA	Zm00001d040678_T014	3
miR396h	miR396	NoDiff	Predict	Zm00001d042380	NA	NA	NA	Zm00001d042380_T001	3
miR396h	miR396	NoDiff	Predict	Zm00001d042776	NA	NA	NA	Zm00001d042776_T001	3
miR396h	miR396	NoDiff	Predict	Zm00001d042804	NA	NA	NA	Zm00001d042804_T002	3
miR396h	miR396	NoDiff	Predict	Zm00001d042834	NA	NA	NA	Zm00001d042834_T004	1.5
miR396h	miR396	NoDiff	Predict	Zm00001d050793	NA	NA	NA	Zm00001d050793_T001	3
miR396h	miR396	NoDiff	Predict	Zm00001d053969	NA	NA	NA	Zm00001d053969_T004	3
miR169p-5p.B73V4_ctg13_31850	miR169	NoDiff	Predict	Zm00001d000101	NA	NA	NA	Zm00001d000101_T001	2
miR169p-5p.B73V4_ctg13_31850	miR169	NoDiff	Predict	Zm00001d003053	NA	NA	NA	Zm00001d003053_T001	3
miR169p-5p.B73V4_ctg13_31850	miR169	NoDiff	Predict	Zm00001d003855	NA	NA	NA	Zm00001d003855_T001	2.5
miR169p-5p.B73V4_ctg13_31850	miR169	NoDiff	Predict	Zm00001d006835	NA	NA	NA	Zm00001d006835_T006	2
miR169p-5p.B73V4_ctg13_31850	miR169	NoDiff	Predict	Zm00001d007912	NA	NA	NA	Zm00001d007912_T013	3
miR169p-5p.B73V4_ctg13_31850	miR169	NoDiff	Predict	Zm00001d013676	NA	NA	NA	Zm00001d013676_T003	2
miR169p-5p.B73V4_ctg13_31850	miR169	NoDiff	Predict	Zm00001d015299	NA	NA	NA	Zm00001d015299_T001	3
miR169p-5p.B73V4_ctg13_31850	miR169	NoDiff	Predict	Zm00001d018255	NA	NA	NA	Zm00001d018255_T001	2
miR169p-5p.B73V4_ctg13_31850	miR169	NoDiff	Predict	Zm00001d022109	NA	NA	NA	Zm00001d022109_T009	2
miR169p-5p.B73V4_ctg13_31850	miR169	NoDiff	Both	Zm00001d027874	Zm00001d027874_T007	0	0.00252463	Zm00001d027874_T011	2
miR169p-5p.B73V4_ctg13_31850	miR169	NoDiff	Predict	Zm00001d029489	NA	NA	NA	Zm00001d029489_T002	2
miR169p-5p.B73V4_ctg13_31850	miR169	NoDiff	Predict	Zm00001d031092	NA	NA	NA	Zm00001d031092_T002	2
miR169p-5p.B73V4_ctg13_31850	miR169	NoDiff	Predict	Zm00001d031529	NA	NA	NA	Zm00001d031529_T016	3
miR169p-5p.B73V4_ctg13_31850	miR169	NoDiff	Predict	Zm00001d033215	NA	NA	NA	Zm00001d033215_T004	2
miR169p-5p.B73V4_ctg13_31850	miR169	NoDiff	Predict	Zm00001d033602	NA	NA	NA	Zm00001d033602_T001	2.5
miR169p-5p.B73V4_ctg13_31850	miR169	NoDiff	Predict	Zm00001d034640	NA	NA	NA	Zm00001d034640_T018	3
miR169p-5p.B73V4_ctg13_31850	miR169	NoDiff	Predict	Zm00001d038675	NA	NA	NA	Zm00001d038675_T276	2
miR169p-5p.B73V4_ctg13_31850	miR169	NoDiff	Predict	Zm00001d041914	NA	NA	NA	Zm00001d041914_T003	3
miR169p-5p.B73V4_ctg13_31850	miR169	NoDiff	Predict	Zm00001d043837	NA	NA	NA	Zm00001d043837_T001	3
miR169p-5p.B73V4_ctg13_31850	miR169	NoDiff	Predict	Zm00001d053986	NA	NA	NA	Zm00001d053986_T001	3
miR166d-3p	miR166	NoDiff	Predict	Zm00001d008869	NA	NA	NA	Zm00001d008869_T001	1
miR166d-3p	miR166	NoDiff	Both	Zm00001d013699	Zm00001d013699_T001	0	0.00560164	Zm00001d013699_T001	1
miR166d-3p	miR166	NoDiff	Predict	Zm00001d014252	NA	NA	NA	Zm00001d014252_T001	1
miR166d-3p	miR166	NoDiff	Predict	Zm00001d017590	NA	NA	NA	Zm00001d017590_T001	3
miR166d-3p	miR166	NoDiff	Predict	Zm00001d018824	NA	NA	NA	Zm00001d018824_T001	1.5
miR166d-3p	miR166	NoDiff	Predict	Zm00001d024060	NA	NA	NA	Zm00001d024060_T001	2
miR166d-3p	miR166	NoDiff	Predict	Zm00001d025050	NA	NA	NA	Zm00001d025050_T003	3
miR166d-3p	miR166	NoDiff	Predict	Zm00001d026307	NA	NA	NA	Zm00001d026307_T001	3
miR166d-3p	miR166	NoDiff	Predict	Zm00001d026325	NA	NA	NA	Zm00001d026325_T001	1
miR166d-3p	miR166	NoDiff	Predict	Zm00001d027317	NA	NA	NA	Zm00001d027317_T032	1
miR166d-3p	miR166	NoDiff	Both	Zm00001d031061	Zm00001d031061_T009	0	0.000842253	Zm00001d031061_T009	1
miR166d-3p	miR166	NoDiff	Predict	Zm00001d032681	NA	NA	NA	Zm00001d032681_T003	1
miR166d-3p	miR166	NoDiff	Predict	Zm00001d033246	NA	NA	NA	Zm00001d033246_T003	1
miR166d-3p	miR166	NoDiff	Degradome	Zm00001d037713	Zm00001d037713_T002	0	0.0263297	NA	NA
miR166d-3p	miR166	NoDiff	Both	Zm00001d041489	Zm00001d041489_T001	0	0.00112285	Zm00001d041489_T008	1
miR166d-3p	miR166	NoDiff	Predict	Zm00001d048527	NA	NA	NA	Zm00001d048527_T022	1
miR166d-3p	miR166	NoDiff	Predict	Zm00001d051851	NA	NA	NA	Zm00001d051851_T001	1.5
miR166d-5p	miR166	DHPE	Predict	Zm00001d003101	NA	NA	NA	Zm00001d003101_T013	3
miR166d-5p	miR166	DHPE	Predict	Zm00001d003261	NA	NA	NA	Zm00001d003261_T019	3
miR166d-5p	miR166	DHPE	Predict	Zm00001d012451	NA	NA	NA	Zm00001d012451_T006	3
miR166d-5p	miR166	DHPE	Predict	Zm00001d014191	NA	NA	NA	Zm00001d014191_T001	2.5
miR166d-5p	miR166	DHPE	Predict	Zm00001d019853	NA	NA	NA	Zm00001d019853_T001	3
miR166d-5p	miR166	DHPE	Predict	Zm00001d024307	NA	NA	NA	Zm00001d024307_T008	2.5
miR166d-5p	miR166	DHPE	Predict	Zm00001d028219	NA	NA	NA	Zm00001d028219_T001	2.5
miR166d-5p	miR166	DHPE	Predict	Zm00001d029566	NA	NA	NA	Zm00001d029566_T003	3
miR166d-5p	miR166	DHPE	Predict	Zm00001d029839	NA	NA	NA	Zm00001d029839_T003	2.5
miR166d-5p	miR166	DHPE	Predict	Zm00001d030256	NA	NA	NA	Zm00001d030256_T001	3
miR166d-5p	miR166	DHPE	Predict	Zm00001d032748	NA	NA	NA	Zm00001d032748_T003	3
miR166d-5p	miR166	DHPE	Predict	Zm00001d034493	NA	NA	NA	Zm00001d034493_T001	2.5
miR166d-5p	miR166	DHPE	Predict	Zm00001d035554	NA	NA	NA	Zm00001d035554_T001	2.5
miR166d-5p	miR166	DHPE	Predict	Zm00001d037641	NA	NA	NA	Zm00001d037641_T001	3
miR166d-5p	miR166	DHPE	Predict	Zm00001d037734	NA	NA	NA	Zm00001d037734_T005	2.5
miR166d-5p	miR166	DHPE	Predict	Zm00001d040166	NA	NA	NA	Zm00001d040166_T006	3
miR166d-5p	miR166	DHPE	Predict	Zm00001d042977	NA	NA	NA	Zm00001d042977_T001	3
miR166d-5p	miR166	DHPE	Predict	Zm00001d044171	NA	NA	NA	Zm00001d044171_T001	3
miR166d-5p	miR166	DHPE	Predict	Zm00001d049599	NA	NA	NA	Zm00001d049599_T001	2.5
miR166d-5p	miR166	DHPE	Predict	Zm00001d049856	NA	NA	NA	Zm00001d049856_T002	2.5
zma-miR156c	miR156	NoDiff	Degradome	Zm00001d031451	Zm00001d031451_T001	0	0.000561581	NA	NA
zma-miR160e	miR160	NoDiff	Degradome	Zm00001d000358	Zm00001d000358_T001	0	0.00308479	NA	NA
zma-miR160e	miR160	NoDiff	Degradome	Zm00001d014013	Zm00001d014013_T004	0	0.00028083	NA	NA
zma-miR160e	miR160	NoDiff	Degradome	Zm00001d014507	Zm00001d014507_T004	0	0.000561581	NA	NA
zma-miR160e	miR160	NoDiff	Degradome	Zm00001d017284	Zm00001d017284_T001	0	0.00560164	NA	NA
zma-miR160e	miR160	NoDiff	Degradome	Zm00001d051172	Zm00001d051172_T001	0	0.00588089	NA	NA
zma-miR395j-3p	miR395	NoDiff	Degradome	Zm00001d033981	Zm00001d033981_T001	3	0.0456492	NA	NA
zma-miR444a	miR444	NoDiff	Predict	Zm00001d002668	NA	NA	NA	Zm00001d002668_T004	3
zma-miR444a	miR444	NoDiff	Predict	Zm00001d003312	NA	NA	NA	Zm00001d003312_T005	3
zma-miR444a	miR444	NoDiff	Predict	Zm00001d006453	NA	NA	NA	Zm00001d006453_T004	3
zma-miR444a	miR444	NoDiff	Both	Zm00001d009108	Zm00001d009108_T001	0	0.00224443	Zm00001d009108_T001	2
zma-miR444a	miR444	NoDiff	Predict	Zm00001d010034	NA	NA	NA	Zm00001d010034_T001	3
zma-miR444a	miR444	NoDiff	Predict	Zm00001d013353	NA	NA	NA	Zm00001d013353_T003	3
zma-miR444a	miR444	NoDiff	Both	Zm00001d016957	Zm00001d016957_T002	0	0.00112285	Zm00001d016957_T002	0
zma-miR444a	miR444	NoDiff	Predict	Zm00001d017932	NA	NA	NA	Zm00001d017932_T004	0.5
zma-miR444a	miR444	NoDiff	Both	Zm00001d024520	Zm00001d024520_T001	0	0.00336476	Zm00001d024520_T001	2.5
zma-miR444a	miR444	NoDiff	Predict	Zm00001d029392	NA	NA	NA	Zm00001d029392_T006	2.5
zma-miR444a	miR444	NoDiff	Predict	Zm00001d032221	NA	NA	NA	Zm00001d032221_T001	2.5
zma-miR444a	miR444	NoDiff	Predict	Zm00001d033080	NA	NA	NA	Zm00001d033080_T001	3
zma-miR444a	miR444	NoDiff	Predict	Zm00001d037830	NA	NA	NA	Zm00001d037830_T001	2.5
zma-miR444a	miR444	NoDiff	Predict	Zm00001d038589	NA	NA	NA	Zm00001d038589_T008	3
zma-miR444a	miR444	NoDiff	Predict	Zm00001d039307	NA	NA	NA	Zm00001d039307_T001	1.5
zma-miR444a	miR444	NoDiff	Predict	Zm00001d040644	NA	NA	NA	Zm00001d040644_T001	3
zma-miR444a	miR444	NoDiff	Predict	Zm00001d050386	NA	NA	NA	Zm00001d050386_T001	1
zma-miR444a	miR444	NoDiff	Both	Zm00001d050897	Zm00001d050897_T001	0	0.000842253	Zm00001d050897_T001	0
zma-miR444a	miR444	NoDiff	Predict	Zm00001d052338	NA	NA	NA	Zm00001d052338_T001	3
zma-miR444b	miR444	NoDiff	Predict	Zm00001d002668	NA	NA	NA	Zm00001d002668_T004	3
zma-miR444b	miR444	NoDiff	Predict	Zm00001d003312	NA	NA	NA	Zm00001d003312_T005	3
zma-miR444b	miR444	NoDiff	Predict	Zm00001d006453	NA	NA	NA	Zm00001d006453_T004	3
zma-miR444b	miR444	NoDiff	Both	Zm00001d009108	Zm00001d009108_T001	0	0.00224443	Zm00001d009108_T001	2
zma-miR444b	miR444	NoDiff	Predict	Zm00001d010034	NA	NA	NA	Zm00001d010034_T001	3
zma-miR444b	miR444	NoDiff	Predict	Zm00001d013353	NA	NA	NA	Zm00001d013353_T003	3
zma-miR444b	miR444	NoDiff	Both	Zm00001d016957	Zm00001d016957_T002	0	0.00112285	Zm00001d016957_T002	0
zma-miR444b	miR444	NoDiff	Predict	Zm00001d017932	NA	NA	NA	Zm00001d017932_T004	0.5
zma-miR444b	miR444	NoDiff	Both	Zm00001d024520	Zm00001d024520_T001	0	0.00336476	Zm00001d024520_T001	2.5
zma-miR444b	miR444	NoDiff	Predict	Zm00001d029392	NA	NA	NA	Zm00001d029392_T006	2.5
zma-miR444b	miR444	NoDiff	Predict	Zm00001d032221	NA	NA	NA	Zm00001d032221_T001	2.5
zma-miR444b	miR444	NoDiff	Predict	Zm00001d033080	NA	NA	NA	Zm00001d033080_T001	3
zma-miR444b	miR444	NoDiff	Predict	Zm00001d037830	NA	NA	NA	Zm00001d037830_T001	2.5
zma-miR444b	miR444	NoDiff	Predict	Zm00001d038589	NA	NA	NA	Zm00001d038589_T008	3
zma-miR444b	miR444	NoDiff	Predict	Zm00001d039307	NA	NA	NA	Zm00001d039307_T001	1.5
zma-miR444b	miR444	NoDiff	Predict	Zm00001d040644	NA	NA	NA	Zm00001d040644_T001	3
zma-miR444b	miR444	NoDiff	Predict	Zm00001d050386	NA	NA	NA	Zm00001d050386_T001	1
zma-miR444b	miR444	NoDiff	Both	Zm00001d050897	Zm00001d050897_T001	0	0.000842253	Zm00001d050897_T001	0
zma-miR444b	miR444	NoDiff	Predict	Zm00001d052338	NA	NA	NA	Zm00001d052338_T001	3
zma-miR11969-3p	miR11969	NoDiff	Predict	Zm00001d004521	NA	NA	NA	Zm00001d004521_T001	3
zma-miR11969-3p	miR11969	NoDiff	Predict	Zm00001d008513	NA	NA	NA	Zm00001d008513_T001	2.5
zma-miR11969-3p	miR11969	NoDiff	Predict	Zm00001d021338	NA	NA	NA	Zm00001d021338_T001	3
zma-miR11969-3p	miR11969	NoDiff	Predict	Zm00001d039696	NA	NA	NA	Zm00001d039696_T001	3
zma-miR11969-3p	miR11969	NoDiff	Predict	Zm00001d047422	NA	NA	NA	Zm00001d047422_T013	3
zma-miR11969-3p	miR11969	NoDiff	Predict	Zm00001d049936	NA	NA	NA	Zm00001d049936_T001	3
zma-miR11969-3p	miR11969	NoDiff	Predict	Zm00001d050764	NA	NA	NA	Zm00001d050764_T001	3
zma-miR11969-3p	miR11969	NoDiff	Predict	Zm00001d051092	NA	NA	NA	Zm00001d051092_T001	3
zma-miR11970-3p	miR11970	NoDiff	Predict	Zm00001d002943	NA	NA	NA	Zm00001d002943_T009	1.5
zma-miR11970-3p	miR11970	NoDiff	Predict	Zm00001d006710	NA	NA	NA	Zm00001d006710_T013	3
zma-miR11970-3p	miR11970	NoDiff	Predict	Zm00001d007832	NA	NA	NA	Zm00001d007832_T001	2.5
zma-miR11970-3p	miR11970	NoDiff	Predict	Zm00001d008432	NA	NA	NA	Zm00001d008432_T002	2.5
zma-miR11970-3p	miR11970	NoDiff	Predict	Zm00001d014038	NA	NA	NA	Zm00001d014038_T001	2.5
zma-miR11970-3p	miR11970	NoDiff	Predict	Zm00001d014255	NA	NA	NA	Zm00001d014255_T001	1.5
zma-miR11970-3p	miR11970	NoDiff	Predict	Zm00001d014379	NA	NA	NA	Zm00001d014379_T001	3
zma-miR11970-3p	miR11970	NoDiff	Predict	Zm00001d015020	NA	NA	NA	Zm00001d015020_T003	2
zma-miR11970-3p	miR11970	NoDiff	Predict	Zm00001d016166	NA	NA	NA	Zm00001d016166_T016	2
zma-miR11970-3p	miR11970	NoDiff	Predict	Zm00001d021900	NA	NA	NA	Zm00001d021900_T001	2.5
zma-miR11970-3p	miR11970	NoDiff	Predict	Zm00001d024825	NA	NA	NA	Zm00001d024825_T012	3
zma-miR11970-3p	miR11970	NoDiff	Predict	Zm00001d028075	NA	NA	NA	Zm00001d028075_T035	3
zma-miR11970-3p	miR11970	NoDiff	Predict	Zm00001d028464	NA	NA	NA	Zm00001d028464_T042	1.5
zma-miR11970-3p	miR11970	NoDiff	Predict	Zm00001d029212	NA	NA	NA	Zm00001d029212_T011	1
zma-miR11970-3p	miR11970	NoDiff	Predict	Zm00001d029560	NA	NA	NA	Zm00001d029560_T001	1
zma-miR11970-3p	miR11970	NoDiff	Predict	Zm00001d034064	NA	NA	NA	Zm00001d034064_T001	3
zma-miR11970-3p	miR11970	NoDiff	Predict	Zm00001d039165	NA	NA	NA	Zm00001d039165_T012	1
zma-miR11970-3p	miR11970	NoDiff	Predict	Zm00001d040920	NA	NA	NA	Zm00001d040920_T001	2
zma-miR11970-3p	miR11970	NoDiff	Predict	Zm00001d044278	NA	NA	NA	Zm00001d044278_T002	2.5
zma-miR11970-3p	miR11970	NoDiff	Predict	Zm00001d047300	NA	NA	NA	Zm00001d047300_T005	1.5
zma-miR11970-3p	miR11970	NoDiff	Predict	Zm00001d047876	NA	NA	NA	Zm00001d047876_T001	3
zma-miR11970-3p	miR11970	NoDiff	Predict	Zm00001d049712	NA	NA	NA	Zm00001d049712_T012	1.5
zma-miR11970-3p	miR11970	NoDiff	Predict	Zm00001d053927	NA	NA	NA	Zm00001d053927_T017	2.5
zma-miR11970-5p	miR11970	NoDiff	Predict	Zm00001d007605	NA	NA	NA	Zm00001d007605_T006	3
zma-miR11970-5p	miR11970	NoDiff	Predict	Zm00001d007832	NA	NA	NA	Zm00001d007832_T001	3
zma-miR11970-5p	miR11970	NoDiff	Predict	Zm00001d010211	NA	NA	NA	Zm00001d010211_T003	3
zma-miR11970-5p	miR11970	NoDiff	Predict	Zm00001d013435	NA	NA	NA	Zm00001d013435_T003	3
zma-miR11970-5p	miR11970	NoDiff	Predict	Zm00001d013439	NA	NA	NA	Zm00001d013439_T007	3
zma-miR11970-5p	miR11970	NoDiff	Predict	Zm00001d015300	NA	NA	NA	Zm00001d015300_T003	3
zma-miR11970-5p	miR11970	NoDiff	Predict	Zm00001d016166	NA	NA	NA	Zm00001d016166_T013	0
zma-miR11970-5p	miR11970	NoDiff	Predict	Zm00001d018625	NA	NA	NA	Zm00001d018625_T041	2.5
zma-miR11970-5p	miR11970	NoDiff	Predict	Zm00001d018668	NA	NA	NA	Zm00001d018668_T004	1.5
zma-miR11970-5p	miR11970	NoDiff	Predict	Zm00001d019542	NA	NA	NA	Zm00001d019542_T001	2.5
zma-miR11970-5p	miR11970	NoDiff	Predict	Zm00001d020176	NA	NA	NA	Zm00001d020176_T001	2.5
zma-miR11970-5p	miR11970	NoDiff	Predict	Zm00001d021684	NA	NA	NA	Zm00001d021684_T003	2.5
zma-miR11970-5p	miR11970	NoDiff	Predict	Zm00001d021900	NA	NA	NA	Zm00001d021900_T001	0.5
zma-miR11970-5p	miR11970	NoDiff	Predict	Zm00001d022132	NA	NA	NA	Zm00001d022132_T010	3
zma-miR11970-5p	miR11970	NoDiff	Predict	Zm00001d022401	NA	NA	NA	Zm00001d022401_T002	1
zma-miR11970-5p	miR11970	NoDiff	Predict	Zm00001d027813	NA	NA	NA	Zm00001d027813_T002	0
zma-miR11970-5p	miR11970	NoDiff	Predict	Zm00001d032757	NA	NA	NA	Zm00001d032757_T002	3
zma-miR11970-5p	miR11970	NoDiff	Predict	Zm00001d038805	NA	NA	NA	Zm00001d038805_T008	3
zma-miR11970-5p	miR11970	NoDiff	Predict	Zm00001d040920	NA	NA	NA	Zm00001d040920_T001	0
zma-miR11970-5p	miR11970	NoDiff	Predict	Zm00001d048119	NA	NA	NA	Zm00001d048119_T037	3
zma-miR11970-5p	miR11970	NoDiff	Predict	Zm00001d048314	NA	NA	NA	Zm00001d048314_T003	3
zma-miR11970-5p	miR11970	NoDiff	Predict	Zm00001d048545	NA	NA	NA	Zm00001d048545_T008	2.5
zma-miR11970-5p	miR11970	NoDiff	Predict	Zm00001d048718	NA	NA	NA	Zm00001d048718_T016	2.5
zma-miR11970-5p	miR11970	NoDiff	Predict	Zm00001d050824	NA	NA	NA	Zm00001d050824_T001	3
zma-miR11970-5p	miR11970	NoDiff	Predict	Zm00001d052193	NA	NA	NA	Zm00001d052193_T012	2.5
zma-miR11970-5p	miR11970	NoDiff	Predict	Zm00001d053927	NA	NA	NA	Zm00001d053927_T017	1
zma-miR11970-5p	miR11970	NoDiff	Predict	Zm00001d053928	NA	NA	NA	Zm00001d053928_T007	1.5
zma-miR11970-5p	miR11970	NoDiff	Predict	Zm00001d053930	NA	NA	NA	Zm00001d053930_T002	0.5
zma-miR1432-3p	miR1432	AE	Predict	Zm00001d024036	NA	NA	NA	Zm00001d024036_T003	3
zma-miR1432-3p	miR1432	AE	Predict	Zm00001d040416	NA	NA	NA	Zm00001d040416_T005	3
zma-miR1432-3p	miR1432	AE	Predict	Zm00001d051344	NA	NA	NA	Zm00001d051344_T001	3
zma-miR1432-5p	miR1432	AE	Predict	Zm00001d003518	NA	NA	NA	Zm00001d003518_T004	3
zma-miR1432-5p	miR1432	AE	Predict	Zm00001d006176	NA	NA	NA	Zm00001d006176_T003	3
zma-miR1432-5p	miR1432	AE	Predict	Zm00001d013004	NA	NA	NA	Zm00001d013004_T001	2.5
zma-miR1432-5p	miR1432	AE	Predict	Zm00001d015446	NA	NA	NA	Zm00001d015446_T033	0
zma-miR1432-5p	miR1432	AE	Predict	Zm00001d021227	NA	NA	NA	Zm00001d021227_T004	3
zma-miR1432-5p	miR1432	AE	Predict	Zm00001d025538	NA	NA	NA	Zm00001d025538_T005	1.5
zma-miR1432-5p	miR1432	AE	Predict	Zm00001d025725	NA	NA	NA	Zm00001d025725_T001	3
zma-miR1432-5p	miR1432	AE	Predict	Zm00001d026003	NA	NA	NA	Zm00001d026003_T001	3
zma-miR1432-5p	miR1432	AE	Predict	Zm00001d031543	NA	NA	NA	Zm00001d031543_T015	2
zma-miR1432-5p	miR1432	AE	Predict	Zm00001d037279	NA	NA	NA	Zm00001d037279_T014	2.5
zma-miR1432-5p	miR1432	AE	Predict	Zm00001d043023	NA	NA	NA	Zm00001d043023_T001	3
zma-miR1432-5p	miR1432	AE	Predict	Zm00001d044757	NA	NA	NA	Zm00001d044757_T020	2.5
zma-miR1432-5p	miR1432	AE	Predict	Zm00001d052295	NA	NA	NA	Zm00001d052295_T023	3
zma-miR156a-3p	miR156	NoDiff	Predict	Zm00001d004493	NA	NA	NA	Zm00001d004493_T001	2.5
zma-miR156a-3p	miR156	NoDiff	Predict	Zm00001d005657	NA	NA	NA	Zm00001d005657_T002	3
zma-miR156a-3p	miR156	NoDiff	Predict	Zm00001d007139	NA	NA	NA	Zm00001d007139_T012	3
zma-miR156a-3p	miR156	NoDiff	Predict	Zm00001d008195	NA	NA	NA	Zm00001d008195_T001	2.5
zma-miR156a-3p	miR156	NoDiff	Predict	Zm00001d016277	NA	NA	NA	Zm00001d016277_T001	2
zma-miR156a-3p	miR156	NoDiff	Predict	Zm00001d016496	NA	NA	NA	Zm00001d016496_T013	3
zma-miR156a-3p	miR156	NoDiff	Predict	Zm00001d016928	NA	NA	NA	Zm00001d016928_T003	3
zma-miR156a-3p	miR156	NoDiff	Predict	Zm00001d017656	NA	NA	NA	Zm00001d017656_T005	3
zma-miR156a-3p	miR156	NoDiff	Predict	Zm00001d017724	NA	NA	NA	Zm00001d017724_T001	3
zma-miR156a-3p	miR156	NoDiff	Predict	Zm00001d018842	NA	NA	NA	Zm00001d018842_T001	3
zma-miR156a-3p	miR156	NoDiff	Predict	Zm00001d020340	NA	NA	NA	Zm00001d020340_T001	3
zma-miR156a-3p	miR156	NoDiff	Predict	Zm00001d021932	NA	NA	NA	Zm00001d021932_T001	3
zma-miR156a-3p	miR156	NoDiff	Predict	Zm00001d027763	NA	NA	NA	Zm00001d027763_T001	3
zma-miR156a-3p	miR156	NoDiff	Predict	Zm00001d029924	NA	NA	NA	Zm00001d029924_T001	1.5
zma-miR156a-3p	miR156	NoDiff	Predict	Zm00001d032359	NA	NA	NA	Zm00001d032359_T001	3
zma-miR156a-3p	miR156	NoDiff	Predict	Zm00001d032716	NA	NA	NA	Zm00001d032716_T003	3
zma-miR156a-3p	miR156	NoDiff	Predict	Zm00001d035913	NA	NA	NA	Zm00001d035913_T010	3
zma-miR156a-3p	miR156	NoDiff	Predict	Zm00001d036593	NA	NA	NA	Zm00001d036593_T001	1.5
zma-miR156a-3p	miR156	NoDiff	Predict	Zm00001d043652	NA	NA	NA	Zm00001d043652_T001	3
zma-miR156a-3p	miR156	NoDiff	Predict	Zm00001d044283	NA	NA	NA	Zm00001d044283_T003	3
zma-miR156a-3p	miR156	NoDiff	Predict	Zm00001d049320	NA	NA	NA	Zm00001d049320_T001	3
zma-miR156a-3p	miR156	NoDiff	Predict	Zm00001d052329	NA	NA	NA	Zm00001d052329_T001	3
zma-miR156a-5p	miR156	DLPE	Predict	Zm00001d006028	NA	NA	NA	Zm00001d006028_T001	1
zma-miR156a-5p	miR156	DLPE	Predict	Zm00001d006091	NA	NA	NA	Zm00001d006091_T001	1
zma-miR156a-5p	miR156	DLPE	Predict	Zm00001d006451	NA	NA	NA	Zm00001d006451_T001	1
zma-miR156a-5p	miR156	DLPE	Predict	Zm00001d007065	NA	NA	NA	Zm00001d007065_T029	2.5
zma-miR156a-5p	miR156	DLPE	Predict	Zm00001d012015	NA	NA	NA	Zm00001d012015_T001	1
zma-miR156a-5p	miR156	DLPE	Predict	Zm00001d013075	NA	NA	NA	Zm00001d013075_T007	3
zma-miR156a-5p	miR156	DLPE	Predict	Zm00001d013757	NA	NA	NA	Zm00001d013757_T004	3
zma-miR156a-5p	miR156	DLPE	Predict	Zm00001d014698	NA	NA	NA	Zm00001d014698_T006	1
zma-miR156a-5p	miR156	DLPE	Predict	Zm00001d015233	NA	NA	NA	Zm00001d015233_T005	1
zma-miR156a-5p	miR156	DLPE	Predict	Zm00001d015410	NA	NA	NA	Zm00001d015410_T003	1
zma-miR156a-5p	miR156	DLPE	Predict	Zm00001d020728	NA	NA	NA	Zm00001d020728_T016	3
zma-miR156a-5p	miR156	DLPE	Predict	Zm00001d020941	NA	NA	NA	Zm00001d020941_T001	1
zma-miR156a-5p	miR156	DLPE	Predict	Zm00001d021056	NA	NA	NA	Zm00001d021056_T001	1
zma-miR156a-5p	miR156	DLPE	Predict	Zm00001d021573	NA	NA	NA	Zm00001d021573_T002	1
zma-miR156a-5p	miR156	DLPE	Predict	Zm00001d024212	NA	NA	NA	Zm00001d024212_T011	3
zma-miR156a-5p	miR156	DLPE	Predict	Zm00001d026175	NA	NA	NA	Zm00001d026175_T001	1
zma-miR156a-5p	miR156	DLPE	Both	Zm00001d031451	Zm00001d031451_T001	0	0.000561581	Zm00001d031451_T001	1
zma-miR156a-5p	miR156	DLPE	Predict	Zm00001d032575	NA	NA	NA	Zm00001d032575_T008	3
zma-miR156a-5p	miR156	DLPE	Predict	Zm00001d035254	NA	NA	NA	Zm00001d035254_T003	3
zma-miR156a-5p	miR156	DLPE	Predict	Zm00001d036507	NA	NA	NA	Zm00001d036507_T038	2.5
zma-miR156a-5p	miR156	DLPE	Predict	Zm00001d039900	NA	NA	NA	Zm00001d039900_T003	1.5
zma-miR156a-5p	miR156	DLPE	Predict	Zm00001d041923	NA	NA	NA	Zm00001d041923_T002	3
zma-miR156a-5p	miR156	DLPE	Predict	Zm00001d042319	NA	NA	NA	Zm00001d042319_T001	1
zma-miR156a-5p	miR156	DLPE	Predict	Zm00001d044274	NA	NA	NA	Zm00001d044274_T002	3
zma-miR156a-5p	miR156	DLPE	Predict	Zm00001d044593	NA	NA	NA	Zm00001d044593_T018	3
zma-miR156a-5p	miR156	DLPE	Predict	Zm00001d046942	NA	NA	NA	Zm00001d046942_T001	2.5
zma-miR156a-5p	miR156	DLPE	Predict	Zm00001d047540	NA	NA	NA	Zm00001d047540_T005	1.5
zma-miR156a-5p	miR156	DLPE	Predict	Zm00001d048007	NA	NA	NA	Zm00001d048007_T002	3
zma-miR156a-5p	miR156	DLPE	Predict	Zm00001d049165	NA	NA	NA	Zm00001d049165_T001	1
zma-miR156a-5p	miR156	DLPE	Predict	Zm00001d049822	NA	NA	NA	Zm00001d049822_T001	1
zma-miR156a-5p	miR156	DLPE	Predict	Zm00001d049824	NA	NA	NA	Zm00001d049824_T002	1
zma-miR156a-5p	miR156	DLPE	Predict	Zm00001d052071	NA	NA	NA	Zm00001d052071_T002	2.5
zma-miR156a-5p	miR156	DLPE	Predict	Zm00001d052890	NA	NA	NA	Zm00001d052890_T001	1
zma-miR156a-5p	miR156	DLPE	Predict	Zm00001d052906	NA	NA	NA	Zm00001d052906_T001	3
zma-miR156a-5p	miR156	DLPE	Predict	Zm00001d053775	NA	NA	NA	Zm00001d053775_T001	1
zma-miR156a-5p	miR156	DLPE	Predict	Zm00001d053890	NA	NA	NA	Zm00001d053890_T006	1
zma-miR156b-3p	miR156	NoDiff	Predict	Zm00001d035817	NA	NA	NA	Zm00001d035817_T001	2.5
zma-miR156b-3p	miR156	NoDiff	Predict	Zm00001d044916	NA	NA	NA	Zm00001d044916_T006	3
zma-miR156b-5p	miR156	DLPE	Predict	Zm00001d006028	NA	NA	NA	Zm00001d006028_T001	1
zma-miR156b-5p	miR156	DLPE	Predict	Zm00001d006091	NA	NA	NA	Zm00001d006091_T001	1
zma-miR156b-5p	miR156	DLPE	Predict	Zm00001d006451	NA	NA	NA	Zm00001d006451_T001	1
zma-miR156b-5p	miR156	DLPE	Predict	Zm00001d007065	NA	NA	NA	Zm00001d007065_T029	2.5
zma-miR156b-5p	miR156	DLPE	Predict	Zm00001d012015	NA	NA	NA	Zm00001d012015_T001	1
zma-miR156b-5p	miR156	DLPE	Predict	Zm00001d013075	NA	NA	NA	Zm00001d013075_T007	3
zma-miR156b-5p	miR156	DLPE	Predict	Zm00001d013757	NA	NA	NA	Zm00001d013757_T004	3
zma-miR156b-5p	miR156	DLPE	Predict	Zm00001d014698	NA	NA	NA	Zm00001d014698_T006	1
zma-miR156b-5p	miR156	DLPE	Predict	Zm00001d015233	NA	NA	NA	Zm00001d015233_T005	1
zma-miR156b-5p	miR156	DLPE	Predict	Zm00001d015410	NA	NA	NA	Zm00001d015410_T003	1
zma-miR156b-5p	miR156	DLPE	Predict	Zm00001d020728	NA	NA	NA	Zm00001d020728_T016	3
zma-miR156b-5p	miR156	DLPE	Predict	Zm00001d020941	NA	NA	NA	Zm00001d020941_T001	1
zma-miR156b-5p	miR156	DLPE	Predict	Zm00001d021056	NA	NA	NA	Zm00001d021056_T001	1
zma-miR156b-5p	miR156	DLPE	Predict	Zm00001d021573	NA	NA	NA	Zm00001d021573_T002	1
zma-miR156b-5p	miR156	DLPE	Predict	Zm00001d024212	NA	NA	NA	Zm00001d024212_T011	3
zma-miR156b-5p	miR156	DLPE	Predict	Zm00001d026175	NA	NA	NA	Zm00001d026175_T001	1
zma-miR156b-5p	miR156	DLPE	Both	Zm00001d031451	Zm00001d031451_T001	0	0.000561581	Zm00001d031451_T001	1
zma-miR156b-5p	miR156	DLPE	Predict	Zm00001d032575	NA	NA	NA	Zm00001d032575_T008	3
zma-miR156b-5p	miR156	DLPE	Predict	Zm00001d035254	NA	NA	NA	Zm00001d035254_T003	3
zma-miR156b-5p	miR156	DLPE	Predict	Zm00001d036507	NA	NA	NA	Zm00001d036507_T038	2.5
zma-miR156b-5p	miR156	DLPE	Predict	Zm00001d039900	NA	NA	NA	Zm00001d039900_T003	1.5
zma-miR156b-5p	miR156	DLPE	Predict	Zm00001d041923	NA	NA	NA	Zm00001d041923_T002	3
zma-miR156b-5p	miR156	DLPE	Predict	Zm00001d042319	NA	NA	NA	Zm00001d042319_T001	1
zma-miR156b-5p	miR156	DLPE	Predict	Zm00001d044274	NA	NA	NA	Zm00001d044274_T002	3
zma-miR156b-5p	miR156	DLPE	Predict	Zm00001d044593	NA	NA	NA	Zm00001d044593_T018	3
zma-miR156b-5p	miR156	DLPE	Predict	Zm00001d046942	NA	NA	NA	Zm00001d046942_T001	2.5
zma-miR156b-5p	miR156	DLPE	Predict	Zm00001d047540	NA	NA	NA	Zm00001d047540_T005	1.5
zma-miR156b-5p	miR156	DLPE	Predict	Zm00001d048007	NA	NA	NA	Zm00001d048007_T002	3
zma-miR156b-5p	miR156	DLPE	Predict	Zm00001d049165	NA	NA	NA	Zm00001d049165_T001	1
zma-miR156b-5p	miR156	DLPE	Predict	Zm00001d049822	NA	NA	NA	Zm00001d049822_T001	1
zma-miR156b-5p	miR156	DLPE	Predict	Zm00001d049824	NA	NA	NA	Zm00001d049824_T002	1
zma-miR156b-5p	miR156	DLPE	Predict	Zm00001d052071	NA	NA	NA	Zm00001d052071_T002	2.5
zma-miR156b-5p	miR156	DLPE	Predict	Zm00001d052890	NA	NA	NA	Zm00001d052890_T001	1
zma-miR156b-5p	miR156	DLPE	Predict	Zm00001d052906	NA	NA	NA	Zm00001d052906_T001	3
zma-miR156b-5p	miR156	DLPE	Predict	Zm00001d053775	NA	NA	NA	Zm00001d053775_T001	1
zma-miR156b-5p	miR156	DLPE	Predict	Zm00001d053890	NA	NA	NA	Zm00001d053890_T006	1
zma-miR156d-3p	miR156	NoDiff	Predict	Zm00001d000077	NA	NA	NA	Zm00001d000077_T001	2.5
zma-miR156d-3p	miR156	NoDiff	Predict	Zm00001d008195	NA	NA	NA	Zm00001d008195_T001	3
zma-miR156d-3p	miR156	NoDiff	Predict	Zm00001d012407	NA	NA	NA	Zm00001d012407_T005	3
zma-miR156d-3p	miR156	NoDiff	Predict	Zm00001d014568	NA	NA	NA	Zm00001d014568_T029	3
zma-miR156d-3p	miR156	NoDiff	Predict	Zm00001d016277	NA	NA	NA	Zm00001d016277_T001	2.5
zma-miR156d-3p	miR156	NoDiff	Predict	Zm00001d021261	NA	NA	NA	Zm00001d021261_T001	3
zma-miR156d-3p	miR156	NoDiff	Predict	Zm00001d029142	NA	NA	NA	Zm00001d029142_T013	3
zma-miR156d-3p	miR156	NoDiff	Predict	Zm00001d029924	NA	NA	NA	Zm00001d029924_T001	2
zma-miR156d-3p	miR156	NoDiff	Predict	Zm00001d036351	NA	NA	NA	Zm00001d036351_T201	3
zma-miR156d-3p	miR156	NoDiff	Predict	Zm00001d036593	NA	NA	NA	Zm00001d036593_T001	2
zma-miR156d-3p	miR156	NoDiff	Predict	Zm00001d036631	NA	NA	NA	Zm00001d036631_T021	3
zma-miR156d-5p	miR156	TLPE	Predict	Zm00001d006028	NA	NA	NA	Zm00001d006028_T001	1
zma-miR156d-5p	miR156	TLPE	Predict	Zm00001d006091	NA	NA	NA	Zm00001d006091_T001	1
zma-miR156d-5p	miR156	TLPE	Predict	Zm00001d006451	NA	NA	NA	Zm00001d006451_T001	1
zma-miR156d-5p	miR156	TLPE	Predict	Zm00001d007065	NA	NA	NA	Zm00001d007065_T029	2.5
zma-miR156d-5p	miR156	TLPE	Predict	Zm00001d012015	NA	NA	NA	Zm00001d012015_T001	1
zma-miR156d-5p	miR156	TLPE	Predict	Zm00001d013075	NA	NA	NA	Zm00001d013075_T007	3
zma-miR156d-5p	miR156	TLPE	Predict	Zm00001d013757	NA	NA	NA	Zm00001d013757_T004	3
zma-miR156d-5p	miR156	TLPE	Predict	Zm00001d014698	NA	NA	NA	Zm00001d014698_T006	1
zma-miR156d-5p	miR156	TLPE	Predict	Zm00001d015233	NA	NA	NA	Zm00001d015233_T005	1
zma-miR156d-5p	miR156	TLPE	Predict	Zm00001d015410	NA	NA	NA	Zm00001d015410_T003	1
zma-miR156d-5p	miR156	TLPE	Predict	Zm00001d020728	NA	NA	NA	Zm00001d020728_T016	3
zma-miR156d-5p	miR156	TLPE	Predict	Zm00001d020941	NA	NA	NA	Zm00001d020941_T001	1
zma-miR156d-5p	miR156	TLPE	Predict	Zm00001d021056	NA	NA	NA	Zm00001d021056_T001	1
zma-miR156d-5p	miR156	TLPE	Predict	Zm00001d021573	NA	NA	NA	Zm00001d021573_T002	1
zma-miR156d-5p	miR156	TLPE	Predict	Zm00001d024212	NA	NA	NA	Zm00001d024212_T011	3
zma-miR156d-5p	miR156	TLPE	Predict	Zm00001d026175	NA	NA	NA	Zm00001d026175_T001	1
zma-miR156d-5p	miR156	TLPE	Both	Zm00001d031451	Zm00001d031451_T001	0	0.000561581	Zm00001d031451_T001	1
zma-miR156d-5p	miR156	TLPE	Predict	Zm00001d032575	NA	NA	NA	Zm00001d032575_T008	3
zma-miR156d-5p	miR156	TLPE	Predict	Zm00001d035254	NA	NA	NA	Zm00001d035254_T003	3
zma-miR156d-5p	miR156	TLPE	Predict	Zm00001d036507	NA	NA	NA	Zm00001d036507_T038	2.5
zma-miR156d-5p	miR156	TLPE	Predict	Zm00001d039900	NA	NA	NA	Zm00001d039900_T003	1.5
zma-miR156d-5p	miR156	TLPE	Predict	Zm00001d041923	NA	NA	NA	Zm00001d041923_T002	3
zma-miR156d-5p	miR156	TLPE	Predict	Zm00001d042319	NA	NA	NA	Zm00001d042319_T001	1
zma-miR156d-5p	miR156	TLPE	Predict	Zm00001d044274	NA	NA	NA	Zm00001d044274_T002	3
zma-miR156d-5p	miR156	TLPE	Predict	Zm00001d044593	NA	NA	NA	Zm00001d044593_T018	3
zma-miR156d-5p	miR156	TLPE	Predict	Zm00001d046942	NA	NA	NA	Zm00001d046942_T001	2.5
zma-miR156d-5p	miR156	TLPE	Predict	Zm00001d047540	NA	NA	NA	Zm00001d047540_T005	1.5
zma-miR156d-5p	miR156	TLPE	Predict	Zm00001d048007	NA	NA	NA	Zm00001d048007_T002	3
zma-miR156d-5p	miR156	TLPE	Predict	Zm00001d049165	NA	NA	NA	Zm00001d049165_T001	1
zma-miR156d-5p	miR156	TLPE	Predict	Zm00001d049822	NA	NA	NA	Zm00001d049822_T001	1
zma-miR156d-5p	miR156	TLPE	Predict	Zm00001d049824	NA	NA	NA	Zm00001d049824_T002	1
zma-miR156d-5p	miR156	TLPE	Predict	Zm00001d052071	NA	NA	NA	Zm00001d052071_T002	2.5
zma-miR156d-5p	miR156	TLPE	Predict	Zm00001d052890	NA	NA	NA	Zm00001d052890_T001	1
zma-miR156d-5p	miR156	TLPE	Predict	Zm00001d052906	NA	NA	NA	Zm00001d052906_T001	3
zma-miR156d-5p	miR156	TLPE	Predict	Zm00001d053775	NA	NA	NA	Zm00001d053775_T001	1
zma-miR156d-5p	miR156	TLPE	Predict	Zm00001d053890	NA	NA	NA	Zm00001d053890_T006	1
zma-miR156e-3p	miR156	NoDiff	Predict	Zm00001d012800	NA	NA	NA	Zm00001d012800_T001	3
zma-miR156e-3p	miR156	NoDiff	Predict	Zm00001d029422	NA	NA	NA	Zm00001d029422_T007	3
zma-miR156e-3p	miR156	NoDiff	Predict	Zm00001d029924	NA	NA	NA	Zm00001d029924_T001	3
zma-miR156e-3p	miR156	NoDiff	Predict	Zm00001d036557	NA	NA	NA	Zm00001d036557_T002	3
zma-miR156e-3p	miR156	NoDiff	Predict	Zm00001d036593	NA	NA	NA	Zm00001d036593_T001	3
zma-miR156e-3p	miR156	NoDiff	Predict	Zm00001d048421	NA	NA	NA	Zm00001d048421_T001	3
zma-miR156e-3p	miR156	NoDiff	Predict	Zm00001d051424	NA	NA	NA	Zm00001d051424_T001	2.5
zma-miR156e-5p	miR156	NoDiff	Predict	Zm00001d006028	NA	NA	NA	Zm00001d006028_T001	1
zma-miR156e-5p	miR156	NoDiff	Predict	Zm00001d006091	NA	NA	NA	Zm00001d006091_T001	1
zma-miR156e-5p	miR156	NoDiff	Predict	Zm00001d006451	NA	NA	NA	Zm00001d006451_T001	1
zma-miR156e-5p	miR156	NoDiff	Predict	Zm00001d007065	NA	NA	NA	Zm00001d007065_T029	2.5
zma-miR156e-5p	miR156	NoDiff	Predict	Zm00001d012015	NA	NA	NA	Zm00001d012015_T001	1
zma-miR156e-5p	miR156	NoDiff	Predict	Zm00001d013075	NA	NA	NA	Zm00001d013075_T007	3
zma-miR156e-5p	miR156	NoDiff	Predict	Zm00001d013757	NA	NA	NA	Zm00001d013757_T004	3
zma-miR156e-5p	miR156	NoDiff	Predict	Zm00001d014698	NA	NA	NA	Zm00001d014698_T006	1
zma-miR156e-5p	miR156	NoDiff	Predict	Zm00001d015233	NA	NA	NA	Zm00001d015233_T005	1
zma-miR156e-5p	miR156	NoDiff	Predict	Zm00001d015410	NA	NA	NA	Zm00001d015410_T003	1
zma-miR156e-5p	miR156	NoDiff	Predict	Zm00001d020728	NA	NA	NA	Zm00001d020728_T016	3
zma-miR156e-5p	miR156	NoDiff	Predict	Zm00001d020941	NA	NA	NA	Zm00001d020941_T001	1
zma-miR156e-5p	miR156	NoDiff	Predict	Zm00001d021056	NA	NA	NA	Zm00001d021056_T001	1
zma-miR156e-5p	miR156	NoDiff	Predict	Zm00001d021573	NA	NA	NA	Zm00001d021573_T002	1
zma-miR156e-5p	miR156	NoDiff	Predict	Zm00001d024212	NA	NA	NA	Zm00001d024212_T011	3
zma-miR156e-5p	miR156	NoDiff	Predict	Zm00001d026175	NA	NA	NA	Zm00001d026175_T001	1
zma-miR156e-5p	miR156	NoDiff	Both	Zm00001d031451	Zm00001d031451_T001	0	0.000561581	Zm00001d031451_T001	1
zma-miR156e-5p	miR156	NoDiff	Predict	Zm00001d032575	NA	NA	NA	Zm00001d032575_T008	3
zma-miR156e-5p	miR156	NoDiff	Predict	Zm00001d035254	NA	NA	NA	Zm00001d035254_T003	3
zma-miR156e-5p	miR156	NoDiff	Predict	Zm00001d036507	NA	NA	NA	Zm00001d036507_T038	2.5
zma-miR156e-5p	miR156	NoDiff	Predict	Zm00001d039900	NA	NA	NA	Zm00001d039900_T003	1.5
zma-miR156e-5p	miR156	NoDiff	Predict	Zm00001d041923	NA	NA	NA	Zm00001d041923_T002	3
zma-miR156e-5p	miR156	NoDiff	Predict	Zm00001d042319	NA	NA	NA	Zm00001d042319_T001	1
zma-miR156e-5p	miR156	NoDiff	Predict	Zm00001d044274	NA	NA	NA	Zm00001d044274_T002	3
zma-miR156e-5p	miR156	NoDiff	Predict	Zm00001d044593	NA	NA	NA	Zm00001d044593_T018	3
zma-miR156e-5p	miR156	NoDiff	Predict	Zm00001d046942	NA	NA	NA	Zm00001d046942_T001	2.5
zma-miR156e-5p	miR156	NoDiff	Predict	Zm00001d047540	NA	NA	NA	Zm00001d047540_T005	1.5
zma-miR156e-5p	miR156	NoDiff	Predict	Zm00001d048007	NA	NA	NA	Zm00001d048007_T002	3
zma-miR156e-5p	miR156	NoDiff	Predict	Zm00001d049165	NA	NA	NA	Zm00001d049165_T001	1
zma-miR156e-5p	miR156	NoDiff	Predict	Zm00001d049822	NA	NA	NA	Zm00001d049822_T001	1
zma-miR156e-5p	miR156	NoDiff	Predict	Zm00001d049824	NA	NA	NA	Zm00001d049824_T002	1
zma-miR156e-5p	miR156	NoDiff	Predict	Zm00001d052071	NA	NA	NA	Zm00001d052071_T002	2.5
zma-miR156e-5p	miR156	NoDiff	Predict	Zm00001d052890	NA	NA	NA	Zm00001d052890_T001	1
zma-miR156e-5p	miR156	NoDiff	Predict	Zm00001d052906	NA	NA	NA	Zm00001d052906_T001	3
zma-miR156e-5p	miR156	NoDiff	Predict	Zm00001d053775	NA	NA	NA	Zm00001d053775_T001	1
zma-miR156e-5p	miR156	NoDiff	Predict	Zm00001d053890	NA	NA	NA	Zm00001d053890_T006	1
zma-miR156f-3p	miR156	NoDiff	Predict	Zm00001d000077	NA	NA	NA	Zm00001d000077_T001	2.5
zma-miR156f-3p	miR156	NoDiff	Predict	Zm00001d008195	NA	NA	NA	Zm00001d008195_T001	3
zma-miR156f-3p	miR156	NoDiff	Predict	Zm00001d012407	NA	NA	NA	Zm00001d012407_T005	3
zma-miR156f-3p	miR156	NoDiff	Predict	Zm00001d014568	NA	NA	NA	Zm00001d014568_T029	3
zma-miR156f-3p	miR156	NoDiff	Predict	Zm00001d016277	NA	NA	NA	Zm00001d016277_T001	2.5
zma-miR156f-3p	miR156	NoDiff	Predict	Zm00001d021261	NA	NA	NA	Zm00001d021261_T001	3
zma-miR156f-3p	miR156	NoDiff	Predict	Zm00001d029142	NA	NA	NA	Zm00001d029142_T013	3
zma-miR156f-3p	miR156	NoDiff	Predict	Zm00001d029924	NA	NA	NA	Zm00001d029924_T001	2
zma-miR156f-3p	miR156	NoDiff	Predict	Zm00001d036351	NA	NA	NA	Zm00001d036351_T201	3
zma-miR156f-3p	miR156	NoDiff	Predict	Zm00001d036593	NA	NA	NA	Zm00001d036593_T001	2
zma-miR156f-3p	miR156	NoDiff	Predict	Zm00001d036631	NA	NA	NA	Zm00001d036631_T021	3
zma-miR156f-5p	miR156	NoDiff	Predict	Zm00001d006028	NA	NA	NA	Zm00001d006028_T001	1
zma-miR156f-5p	miR156	NoDiff	Predict	Zm00001d006091	NA	NA	NA	Zm00001d006091_T001	1
zma-miR156f-5p	miR156	NoDiff	Predict	Zm00001d006451	NA	NA	NA	Zm00001d006451_T001	1
zma-miR156f-5p	miR156	NoDiff	Predict	Zm00001d007065	NA	NA	NA	Zm00001d007065_T029	2.5
zma-miR156f-5p	miR156	NoDiff	Predict	Zm00001d012015	NA	NA	NA	Zm00001d012015_T001	1
zma-miR156f-5p	miR156	NoDiff	Predict	Zm00001d013075	NA	NA	NA	Zm00001d013075_T007	3
zma-miR156f-5p	miR156	NoDiff	Predict	Zm00001d013757	NA	NA	NA	Zm00001d013757_T004	3
zma-miR156f-5p	miR156	NoDiff	Predict	Zm00001d014698	NA	NA	NA	Zm00001d014698_T006	1
zma-miR156f-5p	miR156	NoDiff	Predict	Zm00001d015233	NA	NA	NA	Zm00001d015233_T005	1
zma-miR156f-5p	miR156	NoDiff	Predict	Zm00001d015410	NA	NA	NA	Zm00001d015410_T003	1
zma-miR156f-5p	miR156	NoDiff	Predict	Zm00001d020728	NA	NA	NA	Zm00001d020728_T016	3
zma-miR156f-5p	miR156	NoDiff	Predict	Zm00001d020941	NA	NA	NA	Zm00001d020941_T001	1
zma-miR156f-5p	miR156	NoDiff	Predict	Zm00001d021056	NA	NA	NA	Zm00001d021056_T001	1
zma-miR156f-5p	miR156	NoDiff	Predict	Zm00001d021573	NA	NA	NA	Zm00001d021573_T002	1
zma-miR156f-5p	miR156	NoDiff	Predict	Zm00001d024212	NA	NA	NA	Zm00001d024212_T011	3
zma-miR156f-5p	miR156	NoDiff	Predict	Zm00001d026175	NA	NA	NA	Zm00001d026175_T001	1
zma-miR156f-5p	miR156	NoDiff	Both	Zm00001d031451	Zm00001d031451_T001	0	0.000561581	Zm00001d031451_T001	1
zma-miR156f-5p	miR156	NoDiff	Predict	Zm00001d032575	NA	NA	NA	Zm00001d032575_T008	3
zma-miR156f-5p	miR156	NoDiff	Predict	Zm00001d035254	NA	NA	NA	Zm00001d035254_T003	3
zma-miR156f-5p	miR156	NoDiff	Predict	Zm00001d036507	NA	NA	NA	Zm00001d036507_T038	2.5
zma-miR156f-5p	miR156	NoDiff	Predict	Zm00001d039900	NA	NA	NA	Zm00001d039900_T003	1.5
zma-miR156f-5p	miR156	NoDiff	Predict	Zm00001d041923	NA	NA	NA	Zm00001d041923_T002	3
zma-miR156f-5p	miR156	NoDiff	Predict	Zm00001d042319	NA	NA	NA	Zm00001d042319_T001	1
zma-miR156f-5p	miR156	NoDiff	Predict	Zm00001d044274	NA	NA	NA	Zm00001d044274_T002	3
zma-miR156f-5p	miR156	NoDiff	Predict	Zm00001d044593	NA	NA	NA	Zm00001d044593_T018	3
zma-miR156f-5p	miR156	NoDiff	Predict	Zm00001d046942	NA	NA	NA	Zm00001d046942_T001	2.5
zma-miR156f-5p	miR156	NoDiff	Predict	Zm00001d047540	NA	NA	NA	Zm00001d047540_T005	1.5
zma-miR156f-5p	miR156	NoDiff	Predict	Zm00001d048007	NA	NA	NA	Zm00001d048007_T002	3
zma-miR156f-5p	miR156	NoDiff	Predict	Zm00001d049165	NA	NA	NA	Zm00001d049165_T001	1
zma-miR156f-5p	miR156	NoDiff	Predict	Zm00001d049822	NA	NA	NA	Zm00001d049822_T001	1
zma-miR156f-5p	miR156	NoDiff	Predict	Zm00001d049824	NA	NA	NA	Zm00001d049824_T002	1
zma-miR156f-5p	miR156	NoDiff	Predict	Zm00001d052071	NA	NA	NA	Zm00001d052071_T002	2.5
zma-miR156f-5p	miR156	NoDiff	Predict	Zm00001d052890	NA	NA	NA	Zm00001d052890_T001	1
zma-miR156f-5p	miR156	NoDiff	Predict	Zm00001d052906	NA	NA	NA	Zm00001d052906_T001	3
zma-miR156f-5p	miR156	NoDiff	Predict	Zm00001d053775	NA	NA	NA	Zm00001d053775_T001	1
zma-miR156f-5p	miR156	NoDiff	Predict	Zm00001d053890	NA	NA	NA	Zm00001d053890_T006	1
zma-miR156g-3p	miR156	NoDiff	Predict	Zm00001d000077	NA	NA	NA	Zm00001d000077_T001	2.5
zma-miR156g-3p	miR156	NoDiff	Predict	Zm00001d008195	NA	NA	NA	Zm00001d008195_T001	3
zma-miR156g-3p	miR156	NoDiff	Predict	Zm00001d012407	NA	NA	NA	Zm00001d012407_T005	3
zma-miR156g-3p	miR156	NoDiff	Predict	Zm00001d014568	NA	NA	NA	Zm00001d014568_T029	3
zma-miR156g-3p	miR156	NoDiff	Predict	Zm00001d016277	NA	NA	NA	Zm00001d016277_T001	2.5
zma-miR156g-3p	miR156	NoDiff	Predict	Zm00001d021261	NA	NA	NA	Zm00001d021261_T001	3
zma-miR156g-3p	miR156	NoDiff	Predict	Zm00001d029142	NA	NA	NA	Zm00001d029142_T013	3
zma-miR156g-3p	miR156	NoDiff	Predict	Zm00001d029924	NA	NA	NA	Zm00001d029924_T001	2
zma-miR156g-3p	miR156	NoDiff	Predict	Zm00001d036351	NA	NA	NA	Zm00001d036351_T201	3
zma-miR156g-3p	miR156	NoDiff	Predict	Zm00001d036593	NA	NA	NA	Zm00001d036593_T001	2
zma-miR156g-3p	miR156	NoDiff	Predict	Zm00001d036631	NA	NA	NA	Zm00001d036631_T021	3
zma-miR156g-5p	miR156	NoDiff	Predict	Zm00001d006028	NA	NA	NA	Zm00001d006028_T001	1
zma-miR156g-5p	miR156	NoDiff	Predict	Zm00001d006091	NA	NA	NA	Zm00001d006091_T001	1
zma-miR156g-5p	miR156	NoDiff	Predict	Zm00001d006451	NA	NA	NA	Zm00001d006451_T001	1
zma-miR156g-5p	miR156	NoDiff	Predict	Zm00001d007065	NA	NA	NA	Zm00001d007065_T029	2.5
zma-miR156g-5p	miR156	NoDiff	Predict	Zm00001d012015	NA	NA	NA	Zm00001d012015_T001	1
zma-miR156g-5p	miR156	NoDiff	Predict	Zm00001d013075	NA	NA	NA	Zm00001d013075_T007	3
zma-miR156g-5p	miR156	NoDiff	Predict	Zm00001d013757	NA	NA	NA	Zm00001d013757_T004	3
zma-miR156g-5p	miR156	NoDiff	Predict	Zm00001d014698	NA	NA	NA	Zm00001d014698_T006	1
zma-miR156g-5p	miR156	NoDiff	Predict	Zm00001d015233	NA	NA	NA	Zm00001d015233_T005	1
zma-miR156g-5p	miR156	NoDiff	Predict	Zm00001d015410	NA	NA	NA	Zm00001d015410_T003	1
zma-miR156g-5p	miR156	NoDiff	Predict	Zm00001d020728	NA	NA	NA	Zm00001d020728_T016	3
zma-miR156g-5p	miR156	NoDiff	Predict	Zm00001d020941	NA	NA	NA	Zm00001d020941_T001	1
zma-miR156g-5p	miR156	NoDiff	Predict	Zm00001d021056	NA	NA	NA	Zm00001d021056_T001	1
zma-miR156g-5p	miR156	NoDiff	Predict	Zm00001d021573	NA	NA	NA	Zm00001d021573_T002	1
zma-miR156g-5p	miR156	NoDiff	Predict	Zm00001d024212	NA	NA	NA	Zm00001d024212_T011	3
zma-miR156g-5p	miR156	NoDiff	Predict	Zm00001d026175	NA	NA	NA	Zm00001d026175_T001	1
zma-miR156g-5p	miR156	NoDiff	Both	Zm00001d031451	Zm00001d031451_T001	0	0.000561581	Zm00001d031451_T001	1
zma-miR156g-5p	miR156	NoDiff	Predict	Zm00001d032575	NA	NA	NA	Zm00001d032575_T008	3
zma-miR156g-5p	miR156	NoDiff	Predict	Zm00001d035254	NA	NA	NA	Zm00001d035254_T003	3
zma-miR156g-5p	miR156	NoDiff	Predict	Zm00001d036507	NA	NA	NA	Zm00001d036507_T038	2.5
zma-miR156g-5p	miR156	NoDiff	Predict	Zm00001d039900	NA	NA	NA	Zm00001d039900_T003	1.5
zma-miR156g-5p	miR156	NoDiff	Predict	Zm00001d041923	NA	NA	NA	Zm00001d041923_T002	3
zma-miR156g-5p	miR156	NoDiff	Predict	Zm00001d042319	NA	NA	NA	Zm00001d042319_T001	1
zma-miR156g-5p	miR156	NoDiff	Predict	Zm00001d044274	NA	NA	NA	Zm00001d044274_T002	3
zma-miR156g-5p	miR156	NoDiff	Predict	Zm00001d044593	NA	NA	NA	Zm00001d044593_T018	3
zma-miR156g-5p	miR156	NoDiff	Predict	Zm00001d046942	NA	NA	NA	Zm00001d046942_T001	2.5
zma-miR156g-5p	miR156	NoDiff	Predict	Zm00001d047540	NA	NA	NA	Zm00001d047540_T005	1.5
zma-miR156g-5p	miR156	NoDiff	Predict	Zm00001d048007	NA	NA	NA	Zm00001d048007_T002	3
zma-miR156g-5p	miR156	NoDiff	Predict	Zm00001d049165	NA	NA	NA	Zm00001d049165_T001	1
zma-miR156g-5p	miR156	NoDiff	Predict	Zm00001d049822	NA	NA	NA	Zm00001d049822_T001	1
zma-miR156g-5p	miR156	NoDiff	Predict	Zm00001d049824	NA	NA	NA	Zm00001d049824_T002	1
zma-miR156g-5p	miR156	NoDiff	Predict	Zm00001d052071	NA	NA	NA	Zm00001d052071_T002	2.5
zma-miR156g-5p	miR156	NoDiff	Predict	Zm00001d052890	NA	NA	NA	Zm00001d052890_T001	1
zma-miR156g-5p	miR156	NoDiff	Predict	Zm00001d052906	NA	NA	NA	Zm00001d052906_T001	3
zma-miR156g-5p	miR156	NoDiff	Predict	Zm00001d053775	NA	NA	NA	Zm00001d053775_T001	1
zma-miR156g-5p	miR156	NoDiff	Predict	Zm00001d053890	NA	NA	NA	Zm00001d053890_T006	1
zma-miR156h-3p	miR156	NoDiff	Predict	Zm00001d002424	NA	NA	NA	Zm00001d002424_T002	3
zma-miR156h-3p	miR156	NoDiff	Predict	Zm00001d003265	NA	NA	NA	Zm00001d003265_T002	3
zma-miR156h-3p	miR156	NoDiff	Predict	Zm00001d013522	NA	NA	NA	Zm00001d013522_T001	2.5
zma-miR156h-3p	miR156	NoDiff	Predict	Zm00001d025830	NA	NA	NA	Zm00001d025830_T073	2.5
zma-miR156h-3p	miR156	NoDiff	Predict	Zm00001d041948	NA	NA	NA	Zm00001d041948_T001	2.5
zma-miR156h-3p	miR156	NoDiff	Predict	Zm00001d053262	NA	NA	NA	Zm00001d053262_T001	2.5
zma-miR156h-5p	miR156	TLPE	Predict	Zm00001d006028	NA	NA	NA	Zm00001d006028_T001	1
zma-miR156h-5p	miR156	TLPE	Predict	Zm00001d006091	NA	NA	NA	Zm00001d006091_T001	1
zma-miR156h-5p	miR156	TLPE	Predict	Zm00001d006451	NA	NA	NA	Zm00001d006451_T001	1
zma-miR156h-5p	miR156	TLPE	Predict	Zm00001d007065	NA	NA	NA	Zm00001d007065_T029	2.5
zma-miR156h-5p	miR156	TLPE	Predict	Zm00001d012015	NA	NA	NA	Zm00001d012015_T001	1
zma-miR156h-5p	miR156	TLPE	Predict	Zm00001d013075	NA	NA	NA	Zm00001d013075_T007	3
zma-miR156h-5p	miR156	TLPE	Predict	Zm00001d013757	NA	NA	NA	Zm00001d013757_T004	3
zma-miR156h-5p	miR156	TLPE	Predict	Zm00001d014698	NA	NA	NA	Zm00001d014698_T006	1
zma-miR156h-5p	miR156	TLPE	Predict	Zm00001d015233	NA	NA	NA	Zm00001d015233_T005	1
zma-miR156h-5p	miR156	TLPE	Predict	Zm00001d015410	NA	NA	NA	Zm00001d015410_T003	1
zma-miR156h-5p	miR156	TLPE	Predict	Zm00001d020728	NA	NA	NA	Zm00001d020728_T016	3
zma-miR156h-5p	miR156	TLPE	Predict	Zm00001d020941	NA	NA	NA	Zm00001d020941_T001	1
zma-miR156h-5p	miR156	TLPE	Predict	Zm00001d021056	NA	NA	NA	Zm00001d021056_T001	1
zma-miR156h-5p	miR156	TLPE	Predict	Zm00001d021573	NA	NA	NA	Zm00001d021573_T002	1
zma-miR156h-5p	miR156	TLPE	Predict	Zm00001d024212	NA	NA	NA	Zm00001d024212_T011	3
zma-miR156h-5p	miR156	TLPE	Predict	Zm00001d026175	NA	NA	NA	Zm00001d026175_T001	1
zma-miR156h-5p	miR156	TLPE	Both	Zm00001d031451	Zm00001d031451_T001	0	0.000561581	Zm00001d031451_T001	1
zma-miR156h-5p	miR156	TLPE	Predict	Zm00001d032575	NA	NA	NA	Zm00001d032575_T008	3
zma-miR156h-5p	miR156	TLPE	Predict	Zm00001d035254	NA	NA	NA	Zm00001d035254_T003	3
zma-miR156h-5p	miR156	TLPE	Predict	Zm00001d036507	NA	NA	NA	Zm00001d036507_T038	2.5
zma-miR156h-5p	miR156	TLPE	Predict	Zm00001d039900	NA	NA	NA	Zm00001d039900_T003	1.5
zma-miR156h-5p	miR156	TLPE	Predict	Zm00001d041923	NA	NA	NA	Zm00001d041923_T002	3
zma-miR156h-5p	miR156	TLPE	Predict	Zm00001d042319	NA	NA	NA	Zm00001d042319_T001	1
zma-miR156h-5p	miR156	TLPE	Predict	Zm00001d044274	NA	NA	NA	Zm00001d044274_T002	3
zma-miR156h-5p	miR156	TLPE	Predict	Zm00001d044593	NA	NA	NA	Zm00001d044593_T018	3
zma-miR156h-5p	miR156	TLPE	Predict	Zm00001d046942	NA	NA	NA	Zm00001d046942_T001	2.5
zma-miR156h-5p	miR156	TLPE	Predict	Zm00001d047540	NA	NA	NA	Zm00001d047540_T005	1.5
zma-miR156h-5p	miR156	TLPE	Predict	Zm00001d048007	NA	NA	NA	Zm00001d048007_T002	3
zma-miR156h-5p	miR156	TLPE	Predict	Zm00001d049165	NA	NA	NA	Zm00001d049165_T001	1
zma-miR156h-5p	miR156	TLPE	Predict	Zm00001d049822	NA	NA	NA	Zm00001d049822_T001	1
zma-miR156h-5p	miR156	TLPE	Predict	Zm00001d049824	NA	NA	NA	Zm00001d049824_T002	1
zma-miR156h-5p	miR156	TLPE	Predict	Zm00001d052071	NA	NA	NA	Zm00001d052071_T002	2.5
zma-miR156h-5p	miR156	TLPE	Predict	Zm00001d052890	NA	NA	NA	Zm00001d052890_T001	1
zma-miR156h-5p	miR156	TLPE	Predict	Zm00001d052906	NA	NA	NA	Zm00001d052906_T001	3
zma-miR156h-5p	miR156	TLPE	Predict	Zm00001d053775	NA	NA	NA	Zm00001d053775_T001	1
zma-miR156h-5p	miR156	TLPE	Predict	Zm00001d053890	NA	NA	NA	Zm00001d053890_T006	1
zma-miR156i-3p	miR156	NoDiff	Predict	Zm00001d030328	NA	NA	NA	Zm00001d030328_T003	3
zma-miR156i-3p	miR156	NoDiff	Predict	Zm00001d045567	NA	NA	NA	Zm00001d045567_T001	3
zma-miR156i-5p	miR156	DLPE	Predict	Zm00001d006028	NA	NA	NA	Zm00001d006028_T001	1
zma-miR156i-5p	miR156	DLPE	Predict	Zm00001d006091	NA	NA	NA	Zm00001d006091_T001	1
zma-miR156i-5p	miR156	DLPE	Predict	Zm00001d006451	NA	NA	NA	Zm00001d006451_T001	1
zma-miR156i-5p	miR156	DLPE	Predict	Zm00001d007065	NA	NA	NA	Zm00001d007065_T029	2.5
zma-miR156i-5p	miR156	DLPE	Predict	Zm00001d012015	NA	NA	NA	Zm00001d012015_T001	1
zma-miR156i-5p	miR156	DLPE	Predict	Zm00001d013075	NA	NA	NA	Zm00001d013075_T007	3
zma-miR156i-5p	miR156	DLPE	Predict	Zm00001d013757	NA	NA	NA	Zm00001d013757_T004	3
zma-miR156i-5p	miR156	DLPE	Predict	Zm00001d014698	NA	NA	NA	Zm00001d014698_T006	1
zma-miR156i-5p	miR156	DLPE	Predict	Zm00001d015233	NA	NA	NA	Zm00001d015233_T005	1
zma-miR156i-5p	miR156	DLPE	Predict	Zm00001d015410	NA	NA	NA	Zm00001d015410_T003	1
zma-miR156i-5p	miR156	DLPE	Predict	Zm00001d020728	NA	NA	NA	Zm00001d020728_T016	3
zma-miR156i-5p	miR156	DLPE	Predict	Zm00001d020941	NA	NA	NA	Zm00001d020941_T001	1
zma-miR156i-5p	miR156	DLPE	Predict	Zm00001d021056	NA	NA	NA	Zm00001d021056_T001	1
zma-miR156i-5p	miR156	DLPE	Predict	Zm00001d021573	NA	NA	NA	Zm00001d021573_T002	1
zma-miR156i-5p	miR156	DLPE	Predict	Zm00001d024212	NA	NA	NA	Zm00001d024212_T011	3
zma-miR156i-5p	miR156	DLPE	Predict	Zm00001d026175	NA	NA	NA	Zm00001d026175_T001	1
zma-miR156i-5p	miR156	DLPE	Both	Zm00001d031451	Zm00001d031451_T001	0	0.000561581	Zm00001d031451_T001	1
zma-miR156i-5p	miR156	DLPE	Predict	Zm00001d032575	NA	NA	NA	Zm00001d032575_T008	3
zma-miR156i-5p	miR156	DLPE	Predict	Zm00001d035254	NA	NA	NA	Zm00001d035254_T003	3
zma-miR156i-5p	miR156	DLPE	Predict	Zm00001d036507	NA	NA	NA	Zm00001d036507_T038	2.5
zma-miR156i-5p	miR156	DLPE	Predict	Zm00001d039900	NA	NA	NA	Zm00001d039900_T003	1.5
zma-miR156i-5p	miR156	DLPE	Predict	Zm00001d041923	NA	NA	NA	Zm00001d041923_T002	3
zma-miR156i-5p	miR156	DLPE	Predict	Zm00001d042319	NA	NA	NA	Zm00001d042319_T001	1
zma-miR156i-5p	miR156	DLPE	Predict	Zm00001d044274	NA	NA	NA	Zm00001d044274_T002	3
zma-miR156i-5p	miR156	DLPE	Predict	Zm00001d044593	NA	NA	NA	Zm00001d044593_T018	3
zma-miR156i-5p	miR156	DLPE	Predict	Zm00001d046942	NA	NA	NA	Zm00001d046942_T001	2.5
zma-miR156i-5p	miR156	DLPE	Predict	Zm00001d047540	NA	NA	NA	Zm00001d047540_T005	1.5
zma-miR156i-5p	miR156	DLPE	Predict	Zm00001d048007	NA	NA	NA	Zm00001d048007_T002	3
zma-miR156i-5p	miR156	DLPE	Predict	Zm00001d049165	NA	NA	NA	Zm00001d049165_T001	1
zma-miR156i-5p	miR156	DLPE	Predict	Zm00001d049822	NA	NA	NA	Zm00001d049822_T001	1
zma-miR156i-5p	miR156	DLPE	Predict	Zm00001d049824	NA	NA	NA	Zm00001d049824_T002	1
zma-miR156i-5p	miR156	DLPE	Predict	Zm00001d052071	NA	NA	NA	Zm00001d052071_T002	2.5
zma-miR156i-5p	miR156	DLPE	Predict	Zm00001d052890	NA	NA	NA	Zm00001d052890_T001	1
zma-miR156i-5p	miR156	DLPE	Predict	Zm00001d052906	NA	NA	NA	Zm00001d052906_T001	3
zma-miR156i-5p	miR156	DLPE	Predict	Zm00001d053775	NA	NA	NA	Zm00001d053775_T001	1
zma-miR156i-5p	miR156	DLPE	Predict	Zm00001d053890	NA	NA	NA	Zm00001d053890_T006	1
zma-miR156j-3p	miR156	NoDiff	Predict	Zm00001d002599	NA	NA	NA	Zm00001d002599_T002	3
zma-miR156j-3p	miR156	NoDiff	Predict	Zm00001d011096	NA	NA	NA	Zm00001d011096_T001	1.5
zma-miR156j-3p	miR156	NoDiff	Predict	Zm00001d013090	NA	NA	NA	Zm00001d013090_T002	3
zma-miR156j-3p	miR156	NoDiff	Predict	Zm00001d021958	NA	NA	NA	Zm00001d021958_T003	3
zma-miR156j-3p	miR156	NoDiff	Predict	Zm00001d023492	NA	NA	NA	Zm00001d023492_T001	3
zma-miR156j-3p	miR156	NoDiff	Predict	Zm00001d023494	NA	NA	NA	Zm00001d023494_T015	3
zma-miR156j-3p	miR156	NoDiff	Predict	Zm00001d040161	NA	NA	NA	Zm00001d040161_T002	3
zma-miR156j-3p	miR156	NoDiff	Predict	Zm00001d040162	NA	NA	NA	Zm00001d040162_T008	3
zma-miR156j-3p	miR156	NoDiff	Predict	Zm00001d042111	NA	NA	NA	Zm00001d042111_T001	3
zma-miR156j-3p	miR156	NoDiff	Predict	Zm00001d044596	NA	NA	NA	Zm00001d044596_T001	1
zma-miR156j-3p	miR156	NoDiff	Predict	Zm00001d045538	NA	NA	NA	Zm00001d045538_T002	3
zma-miR156j-5p	miR156	NoDiff	Predict	Zm00001d003479	NA	NA	NA	Zm00001d003479_T001	3
zma-miR156j-5p	miR156	NoDiff	Predict	Zm00001d004744	NA	NA	NA	Zm00001d004744_T001	3
zma-miR156j-5p	miR156	NoDiff	Predict	Zm00001d006028	NA	NA	NA	Zm00001d006028_T001	0
zma-miR156j-5p	miR156	NoDiff	Both	Zm00001d006091	Zm00001d006091_T001	0	0.00364464	Zm00001d006091_T001	0
zma-miR156j-5p	miR156	NoDiff	Predict	Zm00001d006451	NA	NA	NA	Zm00001d006451_T001	0
zma-miR156j-5p	miR156	NoDiff	Predict	Zm00001d009409	NA	NA	NA	Zm00001d009409_T001	3
zma-miR156j-5p	miR156	NoDiff	Predict	Zm00001d010495	NA	NA	NA	Zm00001d010495_T004	3
zma-miR156j-5p	miR156	NoDiff	Predict	Zm00001d011075	NA	NA	NA	Zm00001d011075_T057	3
zma-miR156j-5p	miR156	NoDiff	Predict	Zm00001d011312	NA	NA	NA	Zm00001d011312_T001	3
zma-miR156j-5p	miR156	NoDiff	Predict	Zm00001d012015	NA	NA	NA	Zm00001d012015_T001	0
zma-miR156j-5p	miR156	NoDiff	Predict	Zm00001d012673	NA	NA	NA	Zm00001d012673_T004	3
zma-miR156j-5p	miR156	NoDiff	Predict	Zm00001d013757	NA	NA	NA	Zm00001d013757_T004	3
zma-miR156j-5p	miR156	NoDiff	Predict	Zm00001d013886	NA	NA	NA	Zm00001d013886_T002	3
zma-miR156j-5p	miR156	NoDiff	Both	Zm00001d014698	Zm00001d014698_T001	4	0.0421047	Zm00001d014698_T006	0
zma-miR156j-5p	miR156	NoDiff	Predict	Zm00001d015233	NA	NA	NA	Zm00001d015233_T005	0
zma-miR156j-5p	miR156	NoDiff	Predict	Zm00001d015410	NA	NA	NA	Zm00001d015410_T003	0
zma-miR156j-5p	miR156	NoDiff	Predict	Zm00001d016472	NA	NA	NA	Zm00001d016472_T002	3
zma-miR156j-5p	miR156	NoDiff	Predict	Zm00001d017029	NA	NA	NA	Zm00001d017029_T004	3
zma-miR156j-5p	miR156	NoDiff	Predict	Zm00001d017203	NA	NA	NA	Zm00001d017203_T006	3
zma-miR156j-5p	miR156	NoDiff	Predict	Zm00001d017912	NA	NA	NA	Zm00001d017912_T001	3
zma-miR156j-5p	miR156	NoDiff	Predict	Zm00001d020559	NA	NA	NA	Zm00001d020559_T001	3
zma-miR156j-5p	miR156	NoDiff	Predict	Zm00001d020941	NA	NA	NA	Zm00001d020941_T001	0
zma-miR156j-5p	miR156	NoDiff	Predict	Zm00001d021056	NA	NA	NA	Zm00001d021056_T001	0
zma-miR156j-5p	miR156	NoDiff	Predict	Zm00001d021573	NA	NA	NA	Zm00001d021573_T002	0
zma-miR156j-5p	miR156	NoDiff	Predict	Zm00001d023710	NA	NA	NA	Zm00001d023710_T005	3
zma-miR156j-5p	miR156	NoDiff	Predict	Zm00001d026175	NA	NA	NA	Zm00001d026175_T001	0
zma-miR156j-5p	miR156	NoDiff	Predict	Zm00001d027310	NA	NA	NA	Zm00001d027310_T001	3
zma-miR156j-5p	miR156	NoDiff	Predict	Zm00001d031451	NA	NA	NA	Zm00001d031451_T001	0
zma-miR156j-5p	miR156	NoDiff	Predict	Zm00001d031732	NA	NA	NA	Zm00001d031732_T001	3
zma-miR156j-5p	miR156	NoDiff	Predict	Zm00001d035254	NA	NA	NA	Zm00001d035254_T003	3
zma-miR156j-5p	miR156	NoDiff	Predict	Zm00001d039007	NA	NA	NA	Zm00001d039007_T004	3
zma-miR156j-5p	miR156	NoDiff	Predict	Zm00001d039325	NA	NA	NA	Zm00001d039325_T002	3
zma-miR156j-5p	miR156	NoDiff	Predict	Zm00001d039900	NA	NA	NA	Zm00001d039900_T003	2.5
zma-miR156j-5p	miR156	NoDiff	Predict	Zm00001d042146	NA	NA	NA	Zm00001d042146_T003	3
zma-miR156j-5p	miR156	NoDiff	Predict	Zm00001d042319	NA	NA	NA	Zm00001d042319_T001	0
zma-miR156j-5p	miR156	NoDiff	Predict	Zm00001d043134	NA	NA	NA	Zm00001d043134_T006	3
zma-miR156j-5p	miR156	NoDiff	Predict	Zm00001d045655	NA	NA	NA	Zm00001d045655_T009	3
zma-miR156j-5p	miR156	NoDiff	Predict	Zm00001d046214	NA	NA	NA	Zm00001d046214_T004	3
zma-miR156j-5p	miR156	NoDiff	Predict	Zm00001d046450	NA	NA	NA	Zm00001d046450_T001	2.5
zma-miR156j-5p	miR156	NoDiff	Predict	Zm00001d047539	NA	NA	NA	Zm00001d047539_T022	3
zma-miR156j-5p	miR156	NoDiff	Predict	Zm00001d047540	NA	NA	NA	Zm00001d047540_T005	2.5
zma-miR156j-5p	miR156	NoDiff	Predict	Zm00001d049165	NA	NA	NA	Zm00001d049165_T001	0
zma-miR156j-5p	miR156	NoDiff	Predict	Zm00001d049822	NA	NA	NA	Zm00001d049822_T001	0
zma-miR156j-5p	miR156	NoDiff	Predict	Zm00001d049824	NA	NA	NA	Zm00001d049824_T002	0
zma-miR156j-5p	miR156	NoDiff	Degradome	Zm00001d051553	Zm00001d051553_T004	1	0.0332313	NA	NA
zma-miR156j-5p	miR156	NoDiff	Predict	Zm00001d052011	NA	NA	NA	Zm00001d052011_T005	2.5
zma-miR156j-5p	miR156	NoDiff	Predict	Zm00001d052071	NA	NA	NA	Zm00001d052071_T002	1.5
zma-miR156j-5p	miR156	NoDiff	Predict	Zm00001d052890	NA	NA	NA	Zm00001d052890_T001	0
zma-miR156j-5p	miR156	NoDiff	Predict	Zm00001d053775	NA	NA	NA	Zm00001d053775_T001	0
zma-miR156j-5p	miR156	NoDiff	Predict	Zm00001d053890	NA	NA	NA	Zm00001d053890_T006	0
zma-miR156k-3p	miR156	DLPE	Predict	Zm00001d000077	NA	NA	NA	Zm00001d000077_T004	3
zma-miR156k-3p	miR156	DLPE	Predict	Zm00001d002478	NA	NA	NA	Zm00001d002478_T001	2.5
zma-miR156k-3p	miR156	DLPE	Predict	Zm00001d005478	NA	NA	NA	Zm00001d005478_T008	3
zma-miR156k-3p	miR156	DLPE	Predict	Zm00001d010294	NA	NA	NA	Zm00001d010294_T001	2.5
zma-miR156k-3p	miR156	DLPE	Predict	Zm00001d021127	NA	NA	NA	Zm00001d021127_T009	2.5
zma-miR156k-3p	miR156	DLPE	Predict	Zm00001d023564	NA	NA	NA	Zm00001d023564_T002	3
zma-miR156k-3p	miR156	DLPE	Predict	Zm00001d028695	NA	NA	NA	Zm00001d028695_T004	2
zma-miR156k-3p	miR156	DLPE	Predict	Zm00001d029142	NA	NA	NA	Zm00001d029142_T012	3
zma-miR156k-3p	miR156	DLPE	Predict	Zm00001d029924	NA	NA	NA	Zm00001d029924_T001	2.5
zma-miR156k-3p	miR156	DLPE	Predict	Zm00001d033278	NA	NA	NA	Zm00001d033278_T001	2.5
zma-miR156k-3p	miR156	DLPE	Predict	Zm00001d035695	NA	NA	NA	Zm00001d035695_T013	2.5
zma-miR156k-3p	miR156	DLPE	Predict	Zm00001d036195	NA	NA	NA	Zm00001d036195_T001	2.5
zma-miR156k-3p	miR156	DLPE	Predict	Zm00001d036351	NA	NA	NA	Zm00001d036351_T024	3
zma-miR156k-3p	miR156	DLPE	Predict	Zm00001d036593	NA	NA	NA	Zm00001d036593_T001	2.5
zma-miR156k-3p	miR156	DLPE	Predict	Zm00001d038171	NA	NA	NA	Zm00001d038171_T001	2.5
zma-miR156k-3p	miR156	DLPE	Predict	Zm00001d038608	NA	NA	NA	Zm00001d038608_T001	3
zma-miR156k-3p	miR156	DLPE	Predict	Zm00001d046357	NA	NA	NA	Zm00001d046357_T001	2.5
zma-miR156k-3p	miR156	DLPE	Predict	Zm00001d046939	NA	NA	NA	Zm00001d046939_T004	3
zma-miR156k-3p	miR156	DLPE	Predict	Zm00001d047310	NA	NA	NA	Zm00001d047310_T001	3
zma-miR156k-3p	miR156	DLPE	Predict	Zm00001d051873	NA	NA	NA	Zm00001d051873_T001	2.5
zma-miR156k-3p	miR156	DLPE	Predict	Zm00001d053753	NA	NA	NA	Zm00001d053753_T007	3
zma-miR156k-5p	miR156	DLPE	Predict	Zm00001d002104	NA	NA	NA	Zm00001d002104_T004	3
zma-miR156k-5p	miR156	DLPE	Predict	Zm00001d005584	NA	NA	NA	Zm00001d005584_T007	3
zma-miR156k-5p	miR156	DLPE	Predict	Zm00001d006028	NA	NA	NA	Zm00001d006028_T001	1
zma-miR156k-5p	miR156	DLPE	Predict	Zm00001d006091	NA	NA	NA	Zm00001d006091_T001	1
zma-miR156k-5p	miR156	DLPE	Predict	Zm00001d006132	NA	NA	NA	Zm00001d006132_T001	3
zma-miR156k-5p	miR156	DLPE	Predict	Zm00001d006451	NA	NA	NA	Zm00001d006451_T001	1
zma-miR156k-5p	miR156	DLPE	Predict	Zm00001d012015	NA	NA	NA	Zm00001d012015_T001	1
zma-miR156k-5p	miR156	DLPE	Predict	Zm00001d012240	NA	NA	NA	Zm00001d012240_T005	3
zma-miR156k-5p	miR156	DLPE	Predict	Zm00001d013757	NA	NA	NA	Zm00001d013757_T004	3
zma-miR156k-5p	miR156	DLPE	Predict	Zm00001d014698	NA	NA	NA	Zm00001d014698_T006	1
zma-miR156k-5p	miR156	DLPE	Predict	Zm00001d015233	NA	NA	NA	Zm00001d015233_T005	1
zma-miR156k-5p	miR156	DLPE	Predict	Zm00001d015410	NA	NA	NA	Zm00001d015410_T003	1
zma-miR156k-5p	miR156	DLPE	Predict	Zm00001d020941	NA	NA	NA	Zm00001d020941_T001	1
zma-miR156k-5p	miR156	DLPE	Predict	Zm00001d021056	NA	NA	NA	Zm00001d021056_T001	1
zma-miR156k-5p	miR156	DLPE	Predict	Zm00001d021573	NA	NA	NA	Zm00001d021573_T002	1
zma-miR156k-5p	miR156	DLPE	Predict	Zm00001d022275	NA	NA	NA	Zm00001d022275_T002	3
zma-miR156k-5p	miR156	DLPE	Both	Zm00001d026175	Zm00001d026175_T001	0	0.00028083	Zm00001d026175_T001	1
zma-miR156k-5p	miR156	DLPE	Predict	Zm00001d031451	NA	NA	NA	Zm00001d031451_T001	1
zma-miR156k-5p	miR156	DLPE	Predict	Zm00001d035254	NA	NA	NA	Zm00001d035254_T003	3
zma-miR156k-5p	miR156	DLPE	Predict	Zm00001d039900	NA	NA	NA	Zm00001d039900_T003	2.5
zma-miR156k-5p	miR156	DLPE	Predict	Zm00001d041105	NA	NA	NA	Zm00001d041105_T056	3
zma-miR156k-5p	miR156	DLPE	Predict	Zm00001d042319	NA	NA	NA	Zm00001d042319_T001	1
zma-miR156k-5p	miR156	DLPE	Predict	Zm00001d044274	NA	NA	NA	Zm00001d044274_T002	3
zma-miR156k-5p	miR156	DLPE	Predict	Zm00001d047540	NA	NA	NA	Zm00001d047540_T005	2.5
zma-miR156k-5p	miR156	DLPE	Predict	Zm00001d049165	NA	NA	NA	Zm00001d049165_T001	1
zma-miR156k-5p	miR156	DLPE	Predict	Zm00001d049822	NA	NA	NA	Zm00001d049822_T001	1
zma-miR156k-5p	miR156	DLPE	Predict	Zm00001d049824	NA	NA	NA	Zm00001d049824_T002	1
zma-miR156k-5p	miR156	DLPE	Predict	Zm00001d052071	NA	NA	NA	Zm00001d052071_T002	2.5
zma-miR156k-5p	miR156	DLPE	Predict	Zm00001d052758	NA	NA	NA	Zm00001d052758_T003	3
zma-miR156k-5p	miR156	DLPE	Predict	Zm00001d052890	NA	NA	NA	Zm00001d052890_T001	1
zma-miR156k-5p	miR156	DLPE	Predict	Zm00001d052906	NA	NA	NA	Zm00001d052906_T001	2.5
zma-miR156k-5p	miR156	DLPE	Predict	Zm00001d053775	NA	NA	NA	Zm00001d053775_T001	1
zma-miR156k-5p	miR156	DLPE	Predict	Zm00001d053890	NA	NA	NA	Zm00001d053890_T006	1
zma-miR156l-3p	miR156	AE	Predict	Zm00001d024873	NA	NA	NA	Zm00001d024873_T001	2.5
zma-miR156l-3p	miR156	AE	Predict	Zm00001d030328	NA	NA	NA	Zm00001d030328_T001	3
zma-miR156l-3p	miR156	AE	Predict	Zm00001d045567	NA	NA	NA	Zm00001d045567_T001	3
zma-miR156l-5p	miR156	DLPE	Predict	Zm00001d006028	NA	NA	NA	Zm00001d006028_T001	1
zma-miR156l-5p	miR156	DLPE	Predict	Zm00001d006091	NA	NA	NA	Zm00001d006091_T001	1
zma-miR156l-5p	miR156	DLPE	Predict	Zm00001d006451	NA	NA	NA	Zm00001d006451_T001	1
zma-miR156l-5p	miR156	DLPE	Predict	Zm00001d007065	NA	NA	NA	Zm00001d007065_T029	2.5
zma-miR156l-5p	miR156	DLPE	Predict	Zm00001d012015	NA	NA	NA	Zm00001d012015_T001	1
zma-miR156l-5p	miR156	DLPE	Predict	Zm00001d013075	NA	NA	NA	Zm00001d013075_T007	3
zma-miR156l-5p	miR156	DLPE	Predict	Zm00001d013757	NA	NA	NA	Zm00001d013757_T004	3
zma-miR156l-5p	miR156	DLPE	Predict	Zm00001d014698	NA	NA	NA	Zm00001d014698_T006	1
zma-miR156l-5p	miR156	DLPE	Predict	Zm00001d015233	NA	NA	NA	Zm00001d015233_T005	1
zma-miR156l-5p	miR156	DLPE	Predict	Zm00001d015410	NA	NA	NA	Zm00001d015410_T003	1
zma-miR156l-5p	miR156	DLPE	Predict	Zm00001d020728	NA	NA	NA	Zm00001d020728_T016	3
zma-miR156l-5p	miR156	DLPE	Predict	Zm00001d020941	NA	NA	NA	Zm00001d020941_T001	1
zma-miR156l-5p	miR156	DLPE	Predict	Zm00001d021056	NA	NA	NA	Zm00001d021056_T001	1
zma-miR156l-5p	miR156	DLPE	Predict	Zm00001d021573	NA	NA	NA	Zm00001d021573_T002	1
zma-miR156l-5p	miR156	DLPE	Predict	Zm00001d024212	NA	NA	NA	Zm00001d024212_T011	3
zma-miR156l-5p	miR156	DLPE	Predict	Zm00001d026175	NA	NA	NA	Zm00001d026175_T001	1
zma-miR156l-5p	miR156	DLPE	Both	Zm00001d031451	Zm00001d031451_T001	0	0.000561581	Zm00001d031451_T001	1
zma-miR156l-5p	miR156	DLPE	Predict	Zm00001d032575	NA	NA	NA	Zm00001d032575_T008	3
zma-miR156l-5p	miR156	DLPE	Predict	Zm00001d035254	NA	NA	NA	Zm00001d035254_T003	3
zma-miR156l-5p	miR156	DLPE	Predict	Zm00001d036507	NA	NA	NA	Zm00001d036507_T038	2.5
zma-miR156l-5p	miR156	DLPE	Predict	Zm00001d039900	NA	NA	NA	Zm00001d039900_T003	1.5
zma-miR156l-5p	miR156	DLPE	Predict	Zm00001d041923	NA	NA	NA	Zm00001d041923_T002	3
zma-miR156l-5p	miR156	DLPE	Predict	Zm00001d042319	NA	NA	NA	Zm00001d042319_T001	1
zma-miR156l-5p	miR156	DLPE	Predict	Zm00001d044274	NA	NA	NA	Zm00001d044274_T002	3
zma-miR156l-5p	miR156	DLPE	Predict	Zm00001d044593	NA	NA	NA	Zm00001d044593_T018	3
zma-miR156l-5p	miR156	DLPE	Predict	Zm00001d046942	NA	NA	NA	Zm00001d046942_T001	2.5
zma-miR156l-5p	miR156	DLPE	Predict	Zm00001d047540	NA	NA	NA	Zm00001d047540_T005	1.5
zma-miR156l-5p	miR156	DLPE	Predict	Zm00001d048007	NA	NA	NA	Zm00001d048007_T002	3
zma-miR156l-5p	miR156	DLPE	Predict	Zm00001d049165	NA	NA	NA	Zm00001d049165_T001	1
zma-miR156l-5p	miR156	DLPE	Predict	Zm00001d049822	NA	NA	NA	Zm00001d049822_T001	1
zma-miR156l-5p	miR156	DLPE	Predict	Zm00001d049824	NA	NA	NA	Zm00001d049824_T002	1
zma-miR156l-5p	miR156	DLPE	Predict	Zm00001d052071	NA	NA	NA	Zm00001d052071_T002	2.5
zma-miR156l-5p	miR156	DLPE	Predict	Zm00001d052890	NA	NA	NA	Zm00001d052890_T001	1
zma-miR156l-5p	miR156	DLPE	Predict	Zm00001d052906	NA	NA	NA	Zm00001d052906_T001	3
zma-miR156l-5p	miR156	DLPE	Predict	Zm00001d053775	NA	NA	NA	Zm00001d053775_T001	1
zma-miR156l-5p	miR156	DLPE	Predict	Zm00001d053890	NA	NA	NA	Zm00001d053890_T006	1
zma-miR159a-3p	miR159	AE	Both	Zm00001d000361	Zm00001d000361_T001	0	0.0016838	Zm00001d000361_T001	1.5
zma-miR159a-3p	miR159	AE	Predict	Zm00001d002750	NA	NA	NA	Zm00001d002750_T001	2.5
zma-miR159a-3p	miR159	AE	Predict	Zm00001d002982	NA	NA	NA	Zm00001d002982_T002	3
zma-miR159a-3p	miR159	AE	Predict	Zm00001d005406	NA	NA	NA	Zm00001d005406_T001	2.5
zma-miR159a-3p	miR159	AE	Predict	Zm00001d006133	NA	NA	NA	Zm00001d006133_T001	3
zma-miR159a-3p	miR159	AE	Predict	Zm00001d008904	NA	NA	NA	Zm00001d008904_T004	2.5
zma-miR159a-3p	miR159	AE	Predict	Zm00001d012544	NA	NA	NA	Zm00001d012544_T001	1.5
zma-miR159a-3p	miR159	AE	Predict	Zm00001d013801	NA	NA	NA	Zm00001d013801_T001	2.5
zma-miR159a-3p	miR159	AE	Predict	Zm00001d015521	NA	NA	NA	Zm00001d015521_T001	2.5
zma-miR159a-3p	miR159	AE	Predict	Zm00001d020913	NA	NA	NA	Zm00001d020913_T001	3
zma-miR159a-3p	miR159	AE	Predict	Zm00001d022460	NA	NA	NA	Zm00001d022460_T001	3
zma-miR159a-3p	miR159	AE	Predict	Zm00001d023434	NA	NA	NA	Zm00001d023434_T001	3
zma-miR159a-3p	miR159	AE	Predict	Zm00001d024832	NA	NA	NA	Zm00001d024832_T014	3
zma-miR159a-3p	miR159	AE	Predict	Zm00001d025727	NA	NA	NA	Zm00001d025727_T006	3
zma-miR159a-3p	miR159	AE	Predict	Zm00001d026186	NA	NA	NA	Zm00001d026186_T001	2
zma-miR159a-3p	miR159	AE	Predict	Zm00001d029362	NA	NA	NA	Zm00001d029362_T001	3
zma-miR159a-3p	miR159	AE	Predict	Zm00001d031515	NA	NA	NA	Zm00001d031515_T001	2
zma-miR159a-3p	miR159	AE	Predict	Zm00001d033075	NA	NA	NA	Zm00001d033075_T001	2.5
zma-miR159a-3p	miR159	AE	Both	Zm00001d036551	Zm00001d036551_T001	0	0.00978226	Zm00001d036551_T001	2
zma-miR159a-3p	miR159	AE	Both	Zm00001d036883	Zm00001d036883_T001	0	0.00196415	Zm00001d036883_T001	1.5
zma-miR159a-3p	miR159	AE	Predict	Zm00001d038617	NA	NA	NA	Zm00001d038617_T001	2.5
zma-miR159a-3p	miR159	AE	Predict	Zm00001d043131	NA	NA	NA	Zm00001d043131_T001	2
zma-miR159a-3p	miR159	AE	Predict	Zm00001d044916	NA	NA	NA	Zm00001d044916_T005	3
zma-miR159a-3p	miR159	AE	Both	Zm00001d046517	Zm00001d046517_T001	2	0.0300975	Zm00001d046517_T001	0
zma-miR159a-3p	miR159	AE	Predict	Zm00001d046518	NA	NA	NA	Zm00001d046518_T001	0
zma-miR159a-3p	miR159	AE	Predict	Zm00001d046519	NA	NA	NA	Zm00001d046519_T001	0.5
zma-miR159a-3p	miR159	AE	Predict	Zm00001d049507	NA	NA	NA	Zm00001d049507_T001	3
zma-miR159a-3p	miR159	AE	Predict	Zm00001d053545	NA	NA	NA	Zm00001d053545_T003	2.5
zma-miR159a-3p	miR159	AE	Predict	Zm00001d053589	NA	NA	NA	Zm00001d053589_T005	3
zma-miR159a-5p	miR159	NoDiff	Predict	Zm00001d028796	NA	NA	NA	Zm00001d028796_T001	3
zma-miR159a-5p	miR159	NoDiff	Predict	Zm00001d029550	NA	NA	NA	Zm00001d029550_T017	3
zma-miR159b-3p	miR159	AE	Both	Zm00001d000361	Zm00001d000361_T001	0	0.0016838	Zm00001d000361_T001	1.5
zma-miR159b-3p	miR159	AE	Predict	Zm00001d002750	NA	NA	NA	Zm00001d002750_T001	2.5
zma-miR159b-3p	miR159	AE	Predict	Zm00001d002982	NA	NA	NA	Zm00001d002982_T002	3
zma-miR159b-3p	miR159	AE	Predict	Zm00001d005406	NA	NA	NA	Zm00001d005406_T001	2.5
zma-miR159b-3p	miR159	AE	Predict	Zm00001d006133	NA	NA	NA	Zm00001d006133_T001	3
zma-miR159b-3p	miR159	AE	Predict	Zm00001d008904	NA	NA	NA	Zm00001d008904_T004	2.5
zma-miR159b-3p	miR159	AE	Predict	Zm00001d012544	NA	NA	NA	Zm00001d012544_T001	1.5
zma-miR159b-3p	miR159	AE	Predict	Zm00001d013801	NA	NA	NA	Zm00001d013801_T001	2.5
zma-miR159b-3p	miR159	AE	Predict	Zm00001d015521	NA	NA	NA	Zm00001d015521_T001	2.5
zma-miR159b-3p	miR159	AE	Predict	Zm00001d020913	NA	NA	NA	Zm00001d020913_T001	3
zma-miR159b-3p	miR159	AE	Predict	Zm00001d022460	NA	NA	NA	Zm00001d022460_T001	3
zma-miR159b-3p	miR159	AE	Predict	Zm00001d023434	NA	NA	NA	Zm00001d023434_T001	3
zma-miR159b-3p	miR159	AE	Predict	Zm00001d024832	NA	NA	NA	Zm00001d024832_T014	3
zma-miR159b-3p	miR159	AE	Predict	Zm00001d025727	NA	NA	NA	Zm00001d025727_T006	3
zma-miR159b-3p	miR159	AE	Predict	Zm00001d026186	NA	NA	NA	Zm00001d026186_T001	2
zma-miR159b-3p	miR159	AE	Predict	Zm00001d029362	NA	NA	NA	Zm00001d029362_T001	3
zma-miR159b-3p	miR159	AE	Predict	Zm00001d031515	NA	NA	NA	Zm00001d031515_T001	2
zma-miR159b-3p	miR159	AE	Predict	Zm00001d033075	NA	NA	NA	Zm00001d033075_T001	2.5
zma-miR159b-3p	miR159	AE	Both	Zm00001d036551	Zm00001d036551_T001	0	0.00978226	Zm00001d036551_T001	2
zma-miR159b-3p	miR159	AE	Both	Zm00001d036883	Zm00001d036883_T001	0	0.00196415	Zm00001d036883_T001	1.5
zma-miR159b-3p	miR159	AE	Predict	Zm00001d038617	NA	NA	NA	Zm00001d038617_T001	2.5
zma-miR159b-3p	miR159	AE	Predict	Zm00001d043131	NA	NA	NA	Zm00001d043131_T001	2
zma-miR159b-3p	miR159	AE	Predict	Zm00001d044916	NA	NA	NA	Zm00001d044916_T005	3
zma-miR159b-3p	miR159	AE	Both	Zm00001d046517	Zm00001d046517_T001	2	0.0300975	Zm00001d046517_T001	0
zma-miR159b-3p	miR159	AE	Predict	Zm00001d046518	NA	NA	NA	Zm00001d046518_T001	0
zma-miR159b-3p	miR159	AE	Predict	Zm00001d046519	NA	NA	NA	Zm00001d046519_T001	0.5
zma-miR159b-3p	miR159	AE	Predict	Zm00001d049507	NA	NA	NA	Zm00001d049507_T001	3
zma-miR159b-3p	miR159	AE	Predict	Zm00001d053545	NA	NA	NA	Zm00001d053545_T003	2.5
zma-miR159b-3p	miR159	AE	Predict	Zm00001d053589	NA	NA	NA	Zm00001d053589_T005	3
zma-miR159c-3p	miR159	AE	Predict	Zm00001d000361	NA	NA	NA	Zm00001d000361_T001	2.5
zma-miR159c-3p	miR159	AE	Predict	Zm00001d008904	NA	NA	NA	Zm00001d008904_T002	2.5
zma-miR159c-3p	miR159	AE	Predict	Zm00001d012440	NA	NA	NA	Zm00001d012440_T002	3
zma-miR159c-3p	miR159	AE	Predict	Zm00001d012544	NA	NA	NA	Zm00001d012544_T001	2.5
zma-miR159c-3p	miR159	AE	Predict	Zm00001d013582	NA	NA	NA	Zm00001d013582_T008	3
zma-miR159c-3p	miR159	AE	Predict	Zm00001d013801	NA	NA	NA	Zm00001d013801_T001	2.5
zma-miR159c-3p	miR159	AE	Predict	Zm00001d015521	NA	NA	NA	Zm00001d015521_T001	2.5
zma-miR159c-3p	miR159	AE	Predict	Zm00001d022148	NA	NA	NA	Zm00001d022148_T002	2.5
zma-miR159c-3p	miR159	AE	Predict	Zm00001d022248	NA	NA	NA	Zm00001d022248_T001	3
zma-miR159c-3p	miR159	AE	Predict	Zm00001d022315	NA	NA	NA	Zm00001d022315_T002	3
zma-miR159c-3p	miR159	AE	Predict	Zm00001d022460	NA	NA	NA	Zm00001d022460_T001	3
zma-miR159c-3p	miR159	AE	Predict	Zm00001d026186	NA	NA	NA	Zm00001d026186_T001	3
zma-miR159c-3p	miR159	AE	Predict	Zm00001d031515	NA	NA	NA	Zm00001d031515_T001	3
zma-miR159c-3p	miR159	AE	Predict	Zm00001d033075	NA	NA	NA	Zm00001d033075_T001	2.5
zma-miR159c-3p	miR159	AE	Predict	Zm00001d034948	NA	NA	NA	Zm00001d034948_T008	3
zma-miR159c-3p	miR159	AE	Predict	Zm00001d036551	NA	NA	NA	Zm00001d036551_T001	3
zma-miR159c-3p	miR159	AE	Predict	Zm00001d036883	NA	NA	NA	Zm00001d036883_T001	2.5
zma-miR159c-3p	miR159	AE	Predict	Zm00001d042955	NA	NA	NA	Zm00001d042955_T002	3
zma-miR159c-3p	miR159	AE	Predict	Zm00001d043124	NA	NA	NA	Zm00001d043124_T003	3
zma-miR159c-3p	miR159	AE	Both	Zm00001d043131	Zm00001d043131_T001	0	0.00028083	Zm00001d043131_T001	1.5
zma-miR159c-3p	miR159	AE	Predict	Zm00001d046517	NA	NA	NA	Zm00001d046517_T001	1
zma-miR159c-3p	miR159	AE	Predict	Zm00001d046518	NA	NA	NA	Zm00001d046518_T001	1
zma-miR159c-3p	miR159	AE	Predict	Zm00001d046519	NA	NA	NA	Zm00001d046519_T001	1.5
zma-miR159c-3p	miR159	AE	Predict	Zm00001d053589	NA	NA	NA	Zm00001d053589_T005	3
zma-miR159c-5p	miR159	AE	Predict	Zm00001d002864	NA	NA	NA	Zm00001d002864_T001	3
zma-miR159c-5p	miR159	AE	Predict	Zm00001d024701	NA	NA	NA	Zm00001d024701_T002	2.5
zma-miR159c-5p	miR159	AE	Predict	Zm00001d039334	NA	NA	NA	Zm00001d039334_T001	1.5
zma-miR159c-5p	miR159	AE	Predict	Zm00001d051180	NA	NA	NA	Zm00001d051180_T001	3
zma-miR159d-3p	miR159	AE	Predict	Zm00001d000361	NA	NA	NA	Zm00001d000361_T001	2.5
zma-miR159d-3p	miR159	AE	Predict	Zm00001d008904	NA	NA	NA	Zm00001d008904_T002	2.5
zma-miR159d-3p	miR159	AE	Predict	Zm00001d012440	NA	NA	NA	Zm00001d012440_T002	3
zma-miR159d-3p	miR159	AE	Predict	Zm00001d012544	NA	NA	NA	Zm00001d012544_T001	2.5
zma-miR159d-3p	miR159	AE	Predict	Zm00001d013582	NA	NA	NA	Zm00001d013582_T008	3
zma-miR159d-3p	miR159	AE	Predict	Zm00001d013801	NA	NA	NA	Zm00001d013801_T001	2.5
zma-miR159d-3p	miR159	AE	Predict	Zm00001d015521	NA	NA	NA	Zm00001d015521_T001	2.5
zma-miR159d-3p	miR159	AE	Predict	Zm00001d022148	NA	NA	NA	Zm00001d022148_T002	2.5
zma-miR159d-3p	miR159	AE	Predict	Zm00001d022248	NA	NA	NA	Zm00001d022248_T001	3
zma-miR159d-3p	miR159	AE	Predict	Zm00001d022315	NA	NA	NA	Zm00001d022315_T002	3
zma-miR159d-3p	miR159	AE	Predict	Zm00001d022460	NA	NA	NA	Zm00001d022460_T001	3
zma-miR159d-3p	miR159	AE	Predict	Zm00001d026186	NA	NA	NA	Zm00001d026186_T001	3
zma-miR159d-3p	miR159	AE	Predict	Zm00001d031515	NA	NA	NA	Zm00001d031515_T001	3
zma-miR159d-3p	miR159	AE	Predict	Zm00001d033075	NA	NA	NA	Zm00001d033075_T001	2.5
zma-miR159d-3p	miR159	AE	Predict	Zm00001d034948	NA	NA	NA	Zm00001d034948_T008	3
zma-miR159d-3p	miR159	AE	Predict	Zm00001d036551	NA	NA	NA	Zm00001d036551_T001	3
zma-miR159d-3p	miR159	AE	Predict	Zm00001d036883	NA	NA	NA	Zm00001d036883_T001	2.5
zma-miR159d-3p	miR159	AE	Predict	Zm00001d042955	NA	NA	NA	Zm00001d042955_T002	3
zma-miR159d-3p	miR159	AE	Predict	Zm00001d043124	NA	NA	NA	Zm00001d043124_T003	3
zma-miR159d-3p	miR159	AE	Both	Zm00001d043131	Zm00001d043131_T001	0	0.00028083	Zm00001d043131_T001	1.5
zma-miR159d-3p	miR159	AE	Predict	Zm00001d046517	NA	NA	NA	Zm00001d046517_T001	1
zma-miR159d-3p	miR159	AE	Predict	Zm00001d046518	NA	NA	NA	Zm00001d046518_T001	1
zma-miR159d-3p	miR159	AE	Predict	Zm00001d046519	NA	NA	NA	Zm00001d046519_T001	1.5
zma-miR159d-3p	miR159	AE	Predict	Zm00001d053589	NA	NA	NA	Zm00001d053589_T005	3
zma-miR159d-5p	miR159	AE	Predict	Zm00001d002864	NA	NA	NA	Zm00001d002864_T001	3
zma-miR159d-5p	miR159	AE	Predict	Zm00001d024701	NA	NA	NA	Zm00001d024701_T002	2.5
zma-miR159d-5p	miR159	AE	Predict	Zm00001d039334	NA	NA	NA	Zm00001d039334_T001	1.5
zma-miR159d-5p	miR159	AE	Predict	Zm00001d051180	NA	NA	NA	Zm00001d051180_T001	3
zma-miR159f-3p	miR159	AE	Both	Zm00001d000361	Zm00001d000361_T001	0	0.0016838	Zm00001d000361_T001	1.5
zma-miR159f-3p	miR159	AE	Predict	Zm00001d002750	NA	NA	NA	Zm00001d002750_T001	2.5
zma-miR159f-3p	miR159	AE	Predict	Zm00001d002982	NA	NA	NA	Zm00001d002982_T002	3
zma-miR159f-3p	miR159	AE	Predict	Zm00001d005406	NA	NA	NA	Zm00001d005406_T001	2.5
zma-miR159f-3p	miR159	AE	Predict	Zm00001d006133	NA	NA	NA	Zm00001d006133_T001	3
zma-miR159f-3p	miR159	AE	Predict	Zm00001d008904	NA	NA	NA	Zm00001d008904_T004	2.5
zma-miR159f-3p	miR159	AE	Predict	Zm00001d012544	NA	NA	NA	Zm00001d012544_T001	1.5
zma-miR159f-3p	miR159	AE	Predict	Zm00001d013801	NA	NA	NA	Zm00001d013801_T001	2.5
zma-miR159f-3p	miR159	AE	Predict	Zm00001d015521	NA	NA	NA	Zm00001d015521_T001	2.5
zma-miR159f-3p	miR159	AE	Predict	Zm00001d020913	NA	NA	NA	Zm00001d020913_T001	3
zma-miR159f-3p	miR159	AE	Predict	Zm00001d022460	NA	NA	NA	Zm00001d022460_T001	3
zma-miR159f-3p	miR159	AE	Predict	Zm00001d023434	NA	NA	NA	Zm00001d023434_T001	3
zma-miR159f-3p	miR159	AE	Predict	Zm00001d024832	NA	NA	NA	Zm00001d024832_T014	3
zma-miR159f-3p	miR159	AE	Predict	Zm00001d025727	NA	NA	NA	Zm00001d025727_T006	3
zma-miR159f-3p	miR159	AE	Predict	Zm00001d026186	NA	NA	NA	Zm00001d026186_T001	2
zma-miR159f-3p	miR159	AE	Predict	Zm00001d029362	NA	NA	NA	Zm00001d029362_T001	3
zma-miR159f-3p	miR159	AE	Predict	Zm00001d031515	NA	NA	NA	Zm00001d031515_T001	2
zma-miR159f-3p	miR159	AE	Predict	Zm00001d033075	NA	NA	NA	Zm00001d033075_T001	2.5
zma-miR159f-3p	miR159	AE	Both	Zm00001d036551	Zm00001d036551_T001	0	0.00978226	Zm00001d036551_T001	2
zma-miR159f-3p	miR159	AE	Both	Zm00001d036883	Zm00001d036883_T001	0	0.00196415	Zm00001d036883_T001	1.5
zma-miR159f-3p	miR159	AE	Predict	Zm00001d038617	NA	NA	NA	Zm00001d038617_T001	2.5
zma-miR159f-3p	miR159	AE	Predict	Zm00001d043131	NA	NA	NA	Zm00001d043131_T001	2
zma-miR159f-3p	miR159	AE	Predict	Zm00001d044916	NA	NA	NA	Zm00001d044916_T005	3
zma-miR159f-3p	miR159	AE	Both	Zm00001d046517	Zm00001d046517_T001	2	0.0300975	Zm00001d046517_T001	0
zma-miR159f-3p	miR159	AE	Predict	Zm00001d046518	NA	NA	NA	Zm00001d046518_T001	0
zma-miR159f-3p	miR159	AE	Predict	Zm00001d046519	NA	NA	NA	Zm00001d046519_T001	0.5
zma-miR159f-3p	miR159	AE	Predict	Zm00001d049507	NA	NA	NA	Zm00001d049507_T001	3
zma-miR159f-3p	miR159	AE	Predict	Zm00001d053545	NA	NA	NA	Zm00001d053545_T003	2.5
zma-miR159f-3p	miR159	AE	Predict	Zm00001d053589	NA	NA	NA	Zm00001d053589_T005	3
zma-miR159f-5p	miR159	AE	Predict	Zm00001d009270	NA	NA	NA	Zm00001d009270_T007	3
zma-miR159f-5p	miR159	AE	Predict	Zm00001d011697	NA	NA	NA	Zm00001d011697_T001	3
zma-miR159f-5p	miR159	AE	Predict	Zm00001d015183	NA	NA	NA	Zm00001d015183_T009	3
zma-miR159f-5p	miR159	AE	Predict	Zm00001d033316	NA	NA	NA	Zm00001d033316_T001	3
zma-miR159f-5p	miR159	AE	Predict	Zm00001d045199	NA	NA	NA	Zm00001d045199_T020	3
zma-miR159f-5p	miR159	AE	Predict	Zm00001d052407	NA	NA	NA	Zm00001d052407_T005	2.5
zma-miR159f-5p	miR159	AE	Predict	Zm00001d053916	NA	NA	NA	Zm00001d053916_T002	3
zma-miR159f-5p	miR159	AE	Predict	Zm00001d053918	NA	NA	NA	Zm00001d053918_T001	3
zma-miR159h-3p	miR159	NoDiff	Predict	Zm00001d000361	NA	NA	NA	Zm00001d000361_T001	3
zma-miR159h-3p	miR159	NoDiff	Predict	Zm00001d003864	NA	NA	NA	Zm00001d003864_T001	2.5
zma-miR159h-3p	miR159	NoDiff	Predict	Zm00001d008743	NA	NA	NA	Zm00001d008743_T009	2.5
zma-miR159h-3p	miR159	NoDiff	Predict	Zm00001d009430	NA	NA	NA	Zm00001d009430_T002	3
zma-miR159h-3p	miR159	NoDiff	Predict	Zm00001d010309	NA	NA	NA	Zm00001d010309_T011	3
zma-miR159h-3p	miR159	NoDiff	Predict	Zm00001d012544	NA	NA	NA	Zm00001d012544_T001	2.5
zma-miR159h-3p	miR159	NoDiff	Predict	Zm00001d013582	NA	NA	NA	Zm00001d013582_T008	2.5
zma-miR159h-3p	miR159	NoDiff	Predict	Zm00001d014950	NA	NA	NA	Zm00001d014950_T001	2.5
zma-miR159h-3p	miR159	NoDiff	Predict	Zm00001d018449	NA	NA	NA	Zm00001d018449_T001	3
zma-miR159h-3p	miR159	NoDiff	Predict	Zm00001d023945	NA	NA	NA	Zm00001d023945_T004	3
zma-miR159h-3p	miR159	NoDiff	Predict	Zm00001d024876	NA	NA	NA	Zm00001d024876_T001	3
zma-miR159h-3p	miR159	NoDiff	Predict	Zm00001d024931	NA	NA	NA	Zm00001d024931_T001	2.5
zma-miR159h-3p	miR159	NoDiff	Predict	Zm00001d028654	NA	NA	NA	Zm00001d028654_T003	2.5
zma-miR159h-3p	miR159	NoDiff	Predict	Zm00001d030657	NA	NA	NA	Zm00001d030657_T002	2.5
zma-miR159h-3p	miR159	NoDiff	Predict	Zm00001d034948	NA	NA	NA	Zm00001d034948_T008	2.5
zma-miR159h-3p	miR159	NoDiff	Predict	Zm00001d035833	NA	NA	NA	Zm00001d035833_T001	3
zma-miR159h-3p	miR159	NoDiff	Predict	Zm00001d036883	NA	NA	NA	Zm00001d036883_T001	3
zma-miR159h-3p	miR159	NoDiff	Predict	Zm00001d037386	NA	NA	NA	Zm00001d037386_T001	3
zma-miR159h-3p	miR159	NoDiff	Predict	Zm00001d038018	NA	NA	NA	Zm00001d038018_T001	2.5
zma-miR159h-3p	miR159	NoDiff	Predict	Zm00001d038877	NA	NA	NA	Zm00001d038877_T002	3
zma-miR159h-3p	miR159	NoDiff	Predict	Zm00001d040363	NA	NA	NA	Zm00001d040363_T001	3
zma-miR159h-3p	miR159	NoDiff	Predict	Zm00001d040550	NA	NA	NA	Zm00001d040550_T001	3
zma-miR159h-3p	miR159	NoDiff	Predict	Zm00001d041729	NA	NA	NA	Zm00001d041729_T001	2.5
zma-miR159h-3p	miR159	NoDiff	Predict	Zm00001d043131	NA	NA	NA	Zm00001d043131_T001	0.5
zma-miR159h-3p	miR159	NoDiff	Predict	Zm00001d044916	NA	NA	NA	Zm00001d044916_T005	2
zma-miR159h-3p	miR159	NoDiff	Predict	Zm00001d046517	NA	NA	NA	Zm00001d046517_T001	1.5
zma-miR159h-3p	miR159	NoDiff	Predict	Zm00001d046518	NA	NA	NA	Zm00001d046518_T001	1.5
zma-miR159h-3p	miR159	NoDiff	Predict	Zm00001d046519	NA	NA	NA	Zm00001d046519_T001	1.5
zma-miR159h-3p	miR159	NoDiff	Predict	Zm00001d050670	NA	NA	NA	Zm00001d050670_T002	3
zma-miR159h-3p	miR159	NoDiff	Predict	Zm00001d050950	NA	NA	NA	Zm00001d050950_T003	3
zma-miR159h-3p	miR159	NoDiff	Predict	Zm00001d054072	NA	NA	NA	Zm00001d054072_T003	2.5
zma-miR159i-5p	miR159	NoDiff	Predict	Zm00001d022268	NA	NA	NA	Zm00001d022268_T001	3
zma-miR159i-5p	miR159	NoDiff	Predict	Zm00001d038841	NA	NA	NA	Zm00001d038841_T014	3
zma-miR159i-5p	miR159	NoDiff	Predict	Zm00001d038972	NA	NA	NA	Zm00001d038972_T002	2.5
zma-miR159i-5p	miR159	NoDiff	Predict	Zm00001d042639	NA	NA	NA	Zm00001d042639_T009	2
zma-miR159i-5p	miR159	NoDiff	Predict	Zm00001d048081	NA	NA	NA	Zm00001d048081_T009	3
zma-miR159j-3p	miR159	AE	Both	Zm00001d000361	Zm00001d000361_T001	0	0.0016838	Zm00001d000361_T001	1.5
zma-miR159j-3p	miR159	AE	Predict	Zm00001d002750	NA	NA	NA	Zm00001d002750_T001	2.5
zma-miR159j-3p	miR159	AE	Predict	Zm00001d002982	NA	NA	NA	Zm00001d002982_T002	3
zma-miR159j-3p	miR159	AE	Predict	Zm00001d005406	NA	NA	NA	Zm00001d005406_T001	2.5
zma-miR159j-3p	miR159	AE	Predict	Zm00001d006133	NA	NA	NA	Zm00001d006133_T001	3
zma-miR159j-3p	miR159	AE	Predict	Zm00001d008904	NA	NA	NA	Zm00001d008904_T004	2.5
zma-miR159j-3p	miR159	AE	Predict	Zm00001d012544	NA	NA	NA	Zm00001d012544_T001	1.5
zma-miR159j-3p	miR159	AE	Predict	Zm00001d013801	NA	NA	NA	Zm00001d013801_T001	2.5
zma-miR159j-3p	miR159	AE	Predict	Zm00001d015521	NA	NA	NA	Zm00001d015521_T001	2.5
zma-miR159j-3p	miR159	AE	Predict	Zm00001d020913	NA	NA	NA	Zm00001d020913_T001	3
zma-miR159j-3p	miR159	AE	Predict	Zm00001d022460	NA	NA	NA	Zm00001d022460_T001	3
zma-miR159j-3p	miR159	AE	Predict	Zm00001d023434	NA	NA	NA	Zm00001d023434_T001	3
zma-miR159j-3p	miR159	AE	Predict	Zm00001d024832	NA	NA	NA	Zm00001d024832_T014	3
zma-miR159j-3p	miR159	AE	Predict	Zm00001d025727	NA	NA	NA	Zm00001d025727_T006	3
zma-miR159j-3p	miR159	AE	Predict	Zm00001d026186	NA	NA	NA	Zm00001d026186_T001	2
zma-miR159j-3p	miR159	AE	Predict	Zm00001d029362	NA	NA	NA	Zm00001d029362_T001	3
zma-miR159j-3p	miR159	AE	Predict	Zm00001d031515	NA	NA	NA	Zm00001d031515_T001	2
zma-miR159j-3p	miR159	AE	Predict	Zm00001d033075	NA	NA	NA	Zm00001d033075_T001	2.5
zma-miR159j-3p	miR159	AE	Both	Zm00001d036551	Zm00001d036551_T001	0	0.00978226	Zm00001d036551_T001	2
zma-miR159j-3p	miR159	AE	Both	Zm00001d036883	Zm00001d036883_T001	0	0.00196415	Zm00001d036883_T001	1.5
zma-miR159j-3p	miR159	AE	Predict	Zm00001d038617	NA	NA	NA	Zm00001d038617_T001	2.5
zma-miR159j-3p	miR159	AE	Predict	Zm00001d043131	NA	NA	NA	Zm00001d043131_T001	2
zma-miR159j-3p	miR159	AE	Predict	Zm00001d044916	NA	NA	NA	Zm00001d044916_T005	3
zma-miR159j-3p	miR159	AE	Both	Zm00001d046517	Zm00001d046517_T001	2	0.0300975	Zm00001d046517_T001	0
zma-miR159j-3p	miR159	AE	Predict	Zm00001d046518	NA	NA	NA	Zm00001d046518_T001	0
zma-miR159j-3p	miR159	AE	Predict	Zm00001d046519	NA	NA	NA	Zm00001d046519_T001	0.5
zma-miR159j-3p	miR159	AE	Predict	Zm00001d049507	NA	NA	NA	Zm00001d049507_T001	3
zma-miR159j-3p	miR159	AE	Predict	Zm00001d053545	NA	NA	NA	Zm00001d053545_T003	2.5
zma-miR159j-3p	miR159	AE	Predict	Zm00001d053589	NA	NA	NA	Zm00001d053589_T005	3
zma-miR159k-3p	miR159	AE	Both	Zm00001d000361	Zm00001d000361_T001	0	0.0016838	Zm00001d000361_T001	1.5
zma-miR159k-3p	miR159	AE	Predict	Zm00001d002750	NA	NA	NA	Zm00001d002750_T001	2.5
zma-miR159k-3p	miR159	AE	Predict	Zm00001d002982	NA	NA	NA	Zm00001d002982_T002	3
zma-miR159k-3p	miR159	AE	Predict	Zm00001d005406	NA	NA	NA	Zm00001d005406_T001	2.5
zma-miR159k-3p	miR159	AE	Predict	Zm00001d006133	NA	NA	NA	Zm00001d006133_T001	3
zma-miR159k-3p	miR159	AE	Predict	Zm00001d008904	NA	NA	NA	Zm00001d008904_T004	2.5
zma-miR159k-3p	miR159	AE	Predict	Zm00001d012544	NA	NA	NA	Zm00001d012544_T001	1.5
zma-miR159k-3p	miR159	AE	Predict	Zm00001d013801	NA	NA	NA	Zm00001d013801_T001	2.5
zma-miR159k-3p	miR159	AE	Predict	Zm00001d015521	NA	NA	NA	Zm00001d015521_T001	2.5
zma-miR159k-3p	miR159	AE	Predict	Zm00001d020913	NA	NA	NA	Zm00001d020913_T001	3
zma-miR159k-3p	miR159	AE	Predict	Zm00001d022460	NA	NA	NA	Zm00001d022460_T001	3
zma-miR159k-3p	miR159	AE	Predict	Zm00001d023434	NA	NA	NA	Zm00001d023434_T001	3
zma-miR159k-3p	miR159	AE	Predict	Zm00001d024832	NA	NA	NA	Zm00001d024832_T014	3
zma-miR159k-3p	miR159	AE	Predict	Zm00001d025727	NA	NA	NA	Zm00001d025727_T006	3
zma-miR159k-3p	miR159	AE	Predict	Zm00001d026186	NA	NA	NA	Zm00001d026186_T001	2
zma-miR159k-3p	miR159	AE	Predict	Zm00001d029362	NA	NA	NA	Zm00001d029362_T001	3
zma-miR159k-3p	miR159	AE	Predict	Zm00001d031515	NA	NA	NA	Zm00001d031515_T001	2
zma-miR159k-3p	miR159	AE	Predict	Zm00001d033075	NA	NA	NA	Zm00001d033075_T001	2.5
zma-miR159k-3p	miR159	AE	Both	Zm00001d036551	Zm00001d036551_T001	0	0.00978226	Zm00001d036551_T001	2
zma-miR159k-3p	miR159	AE	Both	Zm00001d036883	Zm00001d036883_T001	0	0.00196415	Zm00001d036883_T001	1.5
zma-miR159k-3p	miR159	AE	Predict	Zm00001d038617	NA	NA	NA	Zm00001d038617_T001	2.5
zma-miR159k-3p	miR159	AE	Predict	Zm00001d043131	NA	NA	NA	Zm00001d043131_T001	2
zma-miR159k-3p	miR159	AE	Predict	Zm00001d044916	NA	NA	NA	Zm00001d044916_T005	3
zma-miR159k-3p	miR159	AE	Both	Zm00001d046517	Zm00001d046517_T001	2	0.0300975	Zm00001d046517_T001	0
zma-miR159k-3p	miR159	AE	Predict	Zm00001d046518	NA	NA	NA	Zm00001d046518_T001	0
zma-miR159k-3p	miR159	AE	Predict	Zm00001d046519	NA	NA	NA	Zm00001d046519_T001	0.5
zma-miR159k-3p	miR159	AE	Predict	Zm00001d049507	NA	NA	NA	Zm00001d049507_T001	3
zma-miR159k-3p	miR159	AE	Predict	Zm00001d053545	NA	NA	NA	Zm00001d053545_T003	2.5
zma-miR159k-3p	miR159	AE	Predict	Zm00001d053589	NA	NA	NA	Zm00001d053589_T005	3
zma-miR160a-3p	miR160	NoDiff	Predict	Zm00001d015788	NA	NA	NA	Zm00001d015788_T002	3
zma-miR160a-3p	miR160	NoDiff	Predict	Zm00001d027265	NA	NA	NA	Zm00001d027265_T002	3
zma-miR160a-3p	miR160	NoDiff	Predict	Zm00001d034282	NA	NA	NA	Zm00001d034282_T012	3
zma-miR160a-3p	miR160	NoDiff	Predict	Zm00001d039975	NA	NA	NA	Zm00001d039975_T001	3
zma-miR160a-3p	miR160	NoDiff	Predict	Zm00001d052324	NA	NA	NA	Zm00001d052324_T001	2.5
zma-miR160a-5p	miR160	THPE	Both	Zm00001d000358	Zm00001d000358_T001	0	0.00308479	Zm00001d000358_T001	0
zma-miR160a-5p	miR160	THPE	Predict	Zm00001d002929	NA	NA	NA	Zm00001d002929_T001	0.5
zma-miR160a-5p	miR160	THPE	Predict	Zm00001d003786	NA	NA	NA	Zm00001d003786_T001	2.5
zma-miR160a-5p	miR160	THPE	Predict	Zm00001d003791	NA	NA	NA	Zm00001d003791_T001	2.5
zma-miR160a-5p	miR160	THPE	Predict	Zm00001d003794	NA	NA	NA	Zm00001d003794_T001	2.5
zma-miR160a-5p	miR160	THPE	Predict	Zm00001d011975	NA	NA	NA	Zm00001d011975_T004	3
zma-miR160a-5p	miR160	THPE	Both	Zm00001d014013	Zm00001d014013_T004	0	0.00028083	Zm00001d014013_T001	0
zma-miR160a-5p	miR160	THPE	Both	Zm00001d014507	Zm00001d014507_T004	0	0.000561581	Zm00001d014507_T002	0
zma-miR160a-5p	miR160	THPE	Predict	Zm00001d016877	NA	NA	NA	Zm00001d016877_T003	3
zma-miR160a-5p	miR160	THPE	Both	Zm00001d017284	Zm00001d017284_T001	0	0.00560164	Zm00001d017284_T001	1
zma-miR160a-5p	miR160	THPE	Predict	Zm00001d022581	NA	NA	NA	Zm00001d022581_T001	3
zma-miR160a-5p	miR160	THPE	Predict	Zm00001d025012	NA	NA	NA	Zm00001d025012_T001	3
zma-miR160a-5p	miR160	THPE	Predict	Zm00001d025021	NA	NA	NA	Zm00001d025021_T001	3
zma-miR160a-5p	miR160	THPE	Predict	Zm00001d025225	NA	NA	NA	Zm00001d025225_T001	3
zma-miR160a-5p	miR160	THPE	Predict	Zm00001d025871	NA	NA	NA	Zm00001d025871_T001	0
zma-miR160a-5p	miR160	THPE	Predict	Zm00001d032683	NA	NA	NA	Zm00001d032683_T001	0
zma-miR160a-5p	miR160	THPE	Predict	Zm00001d034282	NA	NA	NA	Zm00001d034282_T001	3
zma-miR160a-5p	miR160	THPE	Predict	Zm00001d035960	NA	NA	NA	Zm00001d035960_T029	3
zma-miR160a-5p	miR160	THPE	Predict	Zm00001d050238	NA	NA	NA	Zm00001d050238_T001	3
zma-miR160a-5p	miR160	THPE	Both	Zm00001d051172	Zm00001d051172_T001	0	0.00588089	Zm00001d051172_T001	1
zma-miR160b-3p	miR160	NoDiff	Predict	Zm00001d016934	NA	NA	NA	Zm00001d016934_T001	3
zma-miR160b-3p	miR160	NoDiff	Predict	Zm00001d026270	NA	NA	NA	Zm00001d026270_T016	3
zma-miR160b-3p	miR160	NoDiff	Predict	Zm00001d027265	NA	NA	NA	Zm00001d027265_T002	2.5
zma-miR160b-3p	miR160	NoDiff	Predict	Zm00001d035059	NA	NA	NA	Zm00001d035059_T001	3
zma-miR160b-3p	miR160	NoDiff	Predict	Zm00001d037859	NA	NA	NA	Zm00001d037859_T001	3
zma-miR160b-3p	miR160	NoDiff	Predict	Zm00001d041563	NA	NA	NA	Zm00001d041563_T001	3
zma-miR160b-3p	miR160	NoDiff	Predict	Zm00001d042927	NA	NA	NA	Zm00001d042927_T001	3
zma-miR160b-3p	miR160	NoDiff	Degradome	Zm00001d051439	Zm00001d051439_T001	0	0.00196415	NA	NA
zma-miR160b-5p	miR160	THPE	Both	Zm00001d000358	Zm00001d000358_T001	0	0.00308479	Zm00001d000358_T001	0
zma-miR160b-5p	miR160	THPE	Predict	Zm00001d002929	NA	NA	NA	Zm00001d002929_T001	0.5
zma-miR160b-5p	miR160	THPE	Predict	Zm00001d003786	NA	NA	NA	Zm00001d003786_T001	2.5
zma-miR160b-5p	miR160	THPE	Predict	Zm00001d003791	NA	NA	NA	Zm00001d003791_T001	2.5
zma-miR160b-5p	miR160	THPE	Predict	Zm00001d003794	NA	NA	NA	Zm00001d003794_T001	2.5
zma-miR160b-5p	miR160	THPE	Predict	Zm00001d011975	NA	NA	NA	Zm00001d011975_T004	3
zma-miR160b-5p	miR160	THPE	Both	Zm00001d014013	Zm00001d014013_T004	0	0.00028083	Zm00001d014013_T001	0
zma-miR160b-5p	miR160	THPE	Both	Zm00001d014507	Zm00001d014507_T004	0	0.000561581	Zm00001d014507_T002	0
zma-miR160b-5p	miR160	THPE	Predict	Zm00001d016877	NA	NA	NA	Zm00001d016877_T003	3
zma-miR160b-5p	miR160	THPE	Both	Zm00001d017284	Zm00001d017284_T001	0	0.00560164	Zm00001d017284_T001	1
zma-miR160b-5p	miR160	THPE	Predict	Zm00001d022581	NA	NA	NA	Zm00001d022581_T001	3
zma-miR160b-5p	miR160	THPE	Predict	Zm00001d025012	NA	NA	NA	Zm00001d025012_T001	3
zma-miR160b-5p	miR160	THPE	Predict	Zm00001d025021	NA	NA	NA	Zm00001d025021_T001	3
zma-miR160b-5p	miR160	THPE	Predict	Zm00001d025225	NA	NA	NA	Zm00001d025225_T001	3
zma-miR160b-5p	miR160	THPE	Predict	Zm00001d025871	NA	NA	NA	Zm00001d025871_T001	0
zma-miR160b-5p	miR160	THPE	Predict	Zm00001d032683	NA	NA	NA	Zm00001d032683_T001	0
zma-miR160b-5p	miR160	THPE	Predict	Zm00001d034282	NA	NA	NA	Zm00001d034282_T001	3
zma-miR160b-5p	miR160	THPE	Predict	Zm00001d035960	NA	NA	NA	Zm00001d035960_T029	3
zma-miR160b-5p	miR160	THPE	Predict	Zm00001d050238	NA	NA	NA	Zm00001d050238_T001	3
zma-miR160b-5p	miR160	THPE	Both	Zm00001d051172	Zm00001d051172_T001	0	0.00588089	Zm00001d051172_T001	1
zma-miR160c-3p	miR160	THPE	Predict	Zm00001d002266	NA	NA	NA	Zm00001d002266_T006	2.5
zma-miR160c-3p	miR160	THPE	Predict	Zm00001d004955	NA	NA	NA	Zm00001d004955_T001	3
zma-miR160c-3p	miR160	THPE	Predict	Zm00001d013268	NA	NA	NA	Zm00001d013268_T005	1.5
zma-miR160c-3p	miR160	THPE	Predict	Zm00001d013416	NA	NA	NA	Zm00001d013416_T001	3
zma-miR160c-3p	miR160	THPE	Predict	Zm00001d013465	NA	NA	NA	Zm00001d013465_T001	3
zma-miR160c-3p	miR160	THPE	Predict	Zm00001d020921	NA	NA	NA	Zm00001d020921_T001	2
zma-miR160c-3p	miR160	THPE	Predict	Zm00001d023525	NA	NA	NA	Zm00001d023525_T001	3
zma-miR160c-3p	miR160	THPE	Predict	Zm00001d024401	NA	NA	NA	Zm00001d024401_T001	3
zma-miR160c-3p	miR160	THPE	Predict	Zm00001d030181	NA	NA	NA	Zm00001d030181_T001	2.5
zma-miR160c-3p	miR160	THPE	Predict	Zm00001d031130	NA	NA	NA	Zm00001d031130_T001	3
zma-miR160c-3p	miR160	THPE	Predict	Zm00001d039859	NA	NA	NA	Zm00001d039859_T002	3
zma-miR160c-3p	miR160	THPE	Predict	Zm00001d041620	NA	NA	NA	Zm00001d041620_T007	3
zma-miR160c-3p	miR160	THPE	Predict	Zm00001d043301	NA	NA	NA	Zm00001d043301_T003	3
zma-miR160c-3p	miR160	THPE	Predict	Zm00001d044010	NA	NA	NA	Zm00001d044010_T001	2.5
zma-miR160c-3p	miR160	THPE	Predict	Zm00001d044109	NA	NA	NA	Zm00001d044109_T002	3
zma-miR160c-3p	miR160	THPE	Predict	Zm00001d045112	NA	NA	NA	Zm00001d045112_T001	3
zma-miR160c-5p	miR160	THPE	Both	Zm00001d000358	Zm00001d000358_T001	0	0.00308479	Zm00001d000358_T001	0
zma-miR160c-5p	miR160	THPE	Predict	Zm00001d002929	NA	NA	NA	Zm00001d002929_T001	0.5
zma-miR160c-5p	miR160	THPE	Predict	Zm00001d003786	NA	NA	NA	Zm00001d003786_T001	2.5
zma-miR160c-5p	miR160	THPE	Predict	Zm00001d003791	NA	NA	NA	Zm00001d003791_T001	2.5
zma-miR160c-5p	miR160	THPE	Predict	Zm00001d003794	NA	NA	NA	Zm00001d003794_T001	2.5
zma-miR160c-5p	miR160	THPE	Predict	Zm00001d011975	NA	NA	NA	Zm00001d011975_T004	3
zma-miR160c-5p	miR160	THPE	Both	Zm00001d014013	Zm00001d014013_T004	0	0.00028083	Zm00001d014013_T001	0
zma-miR160c-5p	miR160	THPE	Both	Zm00001d014507	Zm00001d014507_T004	0	0.000561581	Zm00001d014507_T002	0
zma-miR160c-5p	miR160	THPE	Predict	Zm00001d016877	NA	NA	NA	Zm00001d016877_T003	3
zma-miR160c-5p	miR160	THPE	Both	Zm00001d017284	Zm00001d017284_T001	0	0.00560164	Zm00001d017284_T001	1
zma-miR160c-5p	miR160	THPE	Predict	Zm00001d022581	NA	NA	NA	Zm00001d022581_T001	3
zma-miR160c-5p	miR160	THPE	Predict	Zm00001d025012	NA	NA	NA	Zm00001d025012_T001	3
zma-miR160c-5p	miR160	THPE	Predict	Zm00001d025021	NA	NA	NA	Zm00001d025021_T001	3
zma-miR160c-5p	miR160	THPE	Predict	Zm00001d025225	NA	NA	NA	Zm00001d025225_T001	3
zma-miR160c-5p	miR160	THPE	Predict	Zm00001d025871	NA	NA	NA	Zm00001d025871_T001	0
zma-miR160c-5p	miR160	THPE	Predict	Zm00001d032683	NA	NA	NA	Zm00001d032683_T001	0
zma-miR160c-5p	miR160	THPE	Predict	Zm00001d034282	NA	NA	NA	Zm00001d034282_T001	3
zma-miR160c-5p	miR160	THPE	Predict	Zm00001d035960	NA	NA	NA	Zm00001d035960_T029	3
zma-miR160c-5p	miR160	THPE	Predict	Zm00001d050238	NA	NA	NA	Zm00001d050238_T001	3
zma-miR160c-5p	miR160	THPE	Both	Zm00001d051172	Zm00001d051172_T001	0	0.00588089	Zm00001d051172_T001	1
zma-miR160d-5p	miR160	THPE	Both	Zm00001d000358	Zm00001d000358_T001	0	0.00308479	Zm00001d000358_T001	0
zma-miR160d-5p	miR160	THPE	Predict	Zm00001d002929	NA	NA	NA	Zm00001d002929_T001	0.5
zma-miR160d-5p	miR160	THPE	Predict	Zm00001d003786	NA	NA	NA	Zm00001d003786_T001	2.5
zma-miR160d-5p	miR160	THPE	Predict	Zm00001d003791	NA	NA	NA	Zm00001d003791_T001	2.5
zma-miR160d-5p	miR160	THPE	Predict	Zm00001d003794	NA	NA	NA	Zm00001d003794_T001	2.5
zma-miR160d-5p	miR160	THPE	Predict	Zm00001d011975	NA	NA	NA	Zm00001d011975_T004	3
zma-miR160d-5p	miR160	THPE	Both	Zm00001d014013	Zm00001d014013_T004	0	0.00028083	Zm00001d014013_T001	0
zma-miR160d-5p	miR160	THPE	Both	Zm00001d014507	Zm00001d014507_T004	0	0.000561581	Zm00001d014507_T002	0
zma-miR160d-5p	miR160	THPE	Predict	Zm00001d016877	NA	NA	NA	Zm00001d016877_T003	3
zma-miR160d-5p	miR160	THPE	Both	Zm00001d017284	Zm00001d017284_T001	0	0.00560164	Zm00001d017284_T001	1
zma-miR160d-5p	miR160	THPE	Predict	Zm00001d022581	NA	NA	NA	Zm00001d022581_T001	3
zma-miR160d-5p	miR160	THPE	Predict	Zm00001d025012	NA	NA	NA	Zm00001d025012_T001	3
zma-miR160d-5p	miR160	THPE	Predict	Zm00001d025021	NA	NA	NA	Zm00001d025021_T001	3
zma-miR160d-5p	miR160	THPE	Predict	Zm00001d025225	NA	NA	NA	Zm00001d025225_T001	3
zma-miR160d-5p	miR160	THPE	Predict	Zm00001d025871	NA	NA	NA	Zm00001d025871_T001	0
zma-miR160d-5p	miR160	THPE	Predict	Zm00001d032683	NA	NA	NA	Zm00001d032683_T001	0
zma-miR160d-5p	miR160	THPE	Predict	Zm00001d034282	NA	NA	NA	Zm00001d034282_T001	3
zma-miR160d-5p	miR160	THPE	Predict	Zm00001d035960	NA	NA	NA	Zm00001d035960_T029	3
zma-miR160d-5p	miR160	THPE	Predict	Zm00001d050238	NA	NA	NA	Zm00001d050238_T001	3
zma-miR160d-5p	miR160	THPE	Both	Zm00001d051172	Zm00001d051172_T001	0	0.00588089	Zm00001d051172_T001	1
zma-miR160f-5p	miR160	NoDiff	Predict	Zm00001d000358	NA	NA	NA	Zm00001d000358_T001	0
zma-miR160f-5p	miR160	NoDiff	Both	Zm00001d002929	Zm00001d002929_T001	0	0.00336476	Zm00001d002929_T001	0.5
zma-miR160f-5p	miR160	NoDiff	Predict	Zm00001d003786	NA	NA	NA	Zm00001d003786_T001	2.5
zma-miR160f-5p	miR160	NoDiff	Predict	Zm00001d003791	NA	NA	NA	Zm00001d003791_T001	2.5
zma-miR160f-5p	miR160	NoDiff	Predict	Zm00001d003794	NA	NA	NA	Zm00001d003794_T001	2.5
zma-miR160f-5p	miR160	NoDiff	Predict	Zm00001d011975	NA	NA	NA	Zm00001d011975_T004	3
zma-miR160f-5p	miR160	NoDiff	Both	Zm00001d014013	Zm00001d014013_T001	0	0.00224443	Zm00001d014013_T001	0
zma-miR160f-5p	miR160	NoDiff	Both	Zm00001d014507	Zm00001d014507_T003	0	0.00196415	Zm00001d014507_T002	0
zma-miR160f-5p	miR160	NoDiff	Predict	Zm00001d016877	NA	NA	NA	Zm00001d016877_T003	3
zma-miR160f-5p	miR160	NoDiff	Predict	Zm00001d017284	NA	NA	NA	Zm00001d017284_T001	1
zma-miR160f-5p	miR160	NoDiff	Predict	Zm00001d022581	NA	NA	NA	Zm00001d022581_T001	3
zma-miR160f-5p	miR160	NoDiff	Predict	Zm00001d025012	NA	NA	NA	Zm00001d025012_T001	3
zma-miR160f-5p	miR160	NoDiff	Predict	Zm00001d025021	NA	NA	NA	Zm00001d025021_T001	3
zma-miR160f-5p	miR160	NoDiff	Predict	Zm00001d025225	NA	NA	NA	Zm00001d025225_T001	3
zma-miR160f-5p	miR160	NoDiff	Both	Zm00001d025871	Zm00001d025871_T001	0	0.000561581	Zm00001d025871_T001	0
zma-miR160f-5p	miR160	NoDiff	Both	Zm00001d032683	Zm00001d032683_T001	0	0.00028083	Zm00001d032683_T001	0
zma-miR160f-5p	miR160	NoDiff	Predict	Zm00001d034282	NA	NA	NA	Zm00001d034282_T001	3
zma-miR160f-5p	miR160	NoDiff	Predict	Zm00001d035960	NA	NA	NA	Zm00001d035960_T029	3
zma-miR160f-5p	miR160	NoDiff	Predict	Zm00001d050238	NA	NA	NA	Zm00001d050238_T001	3
zma-miR160f-5p	miR160	NoDiff	Predict	Zm00001d051172	NA	NA	NA	Zm00001d051172_T001	1
zma-miR160g-3p	miR160	NoDiff	Predict	Zm00001d016934	NA	NA	NA	Zm00001d016934_T001	3
zma-miR160g-3p	miR160	NoDiff	Predict	Zm00001d026270	NA	NA	NA	Zm00001d026270_T016	3
zma-miR160g-3p	miR160	NoDiff	Predict	Zm00001d027265	NA	NA	NA	Zm00001d027265_T002	2.5
zma-miR160g-3p	miR160	NoDiff	Predict	Zm00001d035059	NA	NA	NA	Zm00001d035059_T001	3
zma-miR160g-3p	miR160	NoDiff	Predict	Zm00001d037859	NA	NA	NA	Zm00001d037859_T001	3
zma-miR160g-3p	miR160	NoDiff	Predict	Zm00001d041563	NA	NA	NA	Zm00001d041563_T001	3
zma-miR160g-3p	miR160	NoDiff	Predict	Zm00001d042927	NA	NA	NA	Zm00001d042927_T001	3
zma-miR160g-3p	miR160	NoDiff	Degradome	Zm00001d051439	Zm00001d051439_T001	0	0.00196415	NA	NA
zma-miR160g-5p	miR160	THPE	Both	Zm00001d000358	Zm00001d000358_T001	0	0.00308479	Zm00001d000358_T001	0
zma-miR160g-5p	miR160	THPE	Predict	Zm00001d002929	NA	NA	NA	Zm00001d002929_T001	0.5
zma-miR160g-5p	miR160	THPE	Predict	Zm00001d003786	NA	NA	NA	Zm00001d003786_T001	2.5
zma-miR160g-5p	miR160	THPE	Predict	Zm00001d003791	NA	NA	NA	Zm00001d003791_T001	2.5
zma-miR160g-5p	miR160	THPE	Predict	Zm00001d003794	NA	NA	NA	Zm00001d003794_T001	2.5
zma-miR160g-5p	miR160	THPE	Predict	Zm00001d011975	NA	NA	NA	Zm00001d011975_T004	3
zma-miR160g-5p	miR160	THPE	Both	Zm00001d014013	Zm00001d014013_T004	0	0.00028083	Zm00001d014013_T001	0
zma-miR160g-5p	miR160	THPE	Both	Zm00001d014507	Zm00001d014507_T004	0	0.000561581	Zm00001d014507_T002	0
zma-miR160g-5p	miR160	THPE	Predict	Zm00001d016877	NA	NA	NA	Zm00001d016877_T003	3
zma-miR160g-5p	miR160	THPE	Both	Zm00001d017284	Zm00001d017284_T001	0	0.00560164	Zm00001d017284_T001	1
zma-miR160g-5p	miR160	THPE	Predict	Zm00001d022581	NA	NA	NA	Zm00001d022581_T001	3
zma-miR160g-5p	miR160	THPE	Predict	Zm00001d025012	NA	NA	NA	Zm00001d025012_T001	3
zma-miR160g-5p	miR160	THPE	Predict	Zm00001d025021	NA	NA	NA	Zm00001d025021_T001	3
zma-miR160g-5p	miR160	THPE	Predict	Zm00001d025225	NA	NA	NA	Zm00001d025225_T001	3
zma-miR160g-5p	miR160	THPE	Predict	Zm00001d025871	NA	NA	NA	Zm00001d025871_T001	0
zma-miR160g-5p	miR160	THPE	Predict	Zm00001d032683	NA	NA	NA	Zm00001d032683_T001	0
zma-miR160g-5p	miR160	THPE	Predict	Zm00001d034282	NA	NA	NA	Zm00001d034282_T001	3
zma-miR160g-5p	miR160	THPE	Predict	Zm00001d035960	NA	NA	NA	Zm00001d035960_T029	3
zma-miR160g-5p	miR160	THPE	Predict	Zm00001d050238	NA	NA	NA	Zm00001d050238_T001	3
zma-miR160g-5p	miR160	THPE	Both	Zm00001d051172	Zm00001d051172_T001	0	0.00588089	Zm00001d051172_T001	1
zma-miR162-3p	miR162	NoDiff	Predict	Zm00001d022529	NA	NA	NA	Zm00001d022529_T001	2.5
zma-miR162-3p	miR162	NoDiff	Both	Zm00001d027412	Zm00001d027412_T055	2	0.0300975	Zm00001d027412_T064	3
zma-miR162-3p	miR162	NoDiff	Predict	Zm00001d028621	NA	NA	NA	Zm00001d028621_T001	3
zma-miR162-3p	miR162	NoDiff	Predict	Zm00001d030341	NA	NA	NA	Zm00001d030341_T001	3
zma-miR162-3p	miR162	NoDiff	Predict	Zm00001d031759	NA	NA	NA	Zm00001d031759_T001	3
zma-miR162-3p	miR162	NoDiff	Predict	Zm00001d041038	NA	NA	NA	Zm00001d041038_T001	3
zma-miR162-3p	miR162	NoDiff	Predict	Zm00001d047976	NA	NA	NA	Zm00001d047976_T001	3
zma-miR162-5p	miR162	NoDiff	Predict	Zm00001d017119	NA	NA	NA	Zm00001d017119_T001	3
zma-miR162-5p	miR162	NoDiff	Predict	Zm00001d034346	NA	NA	NA	Zm00001d034346_T002	3
zma-miR162-5p	miR162	NoDiff	Predict	Zm00001d036343	NA	NA	NA	Zm00001d036343_T025	3
zma-miR162-5p	miR162	NoDiff	Predict	Zm00001d042123	NA	NA	NA	Zm00001d042123_T001	3
zma-miR162-5p	miR162	NoDiff	Predict	Zm00001d042125	NA	NA	NA	Zm00001d042125_T002	3
zma-miR162-5p	miR162	NoDiff	Predict	Zm00001d048514	NA	NA	NA	Zm00001d048514_T001	3
zma-miR162-5p	miR162	NoDiff	Predict	Zm00001d053251	NA	NA	NA	Zm00001d053251_T019	3
zma-miR164a-3p	miR164	NoDiff	Predict	Zm00001d005328	NA	NA	NA	Zm00001d005328_T002	3
zma-miR164a-3p	miR164	NoDiff	Predict	Zm00001d010077	NA	NA	NA	Zm00001d010077_T001	3
zma-miR164a-3p	miR164	NoDiff	Predict	Zm00001d010961	NA	NA	NA	Zm00001d010961_T001	3
zma-miR164a-3p	miR164	NoDiff	Predict	Zm00001d014074	NA	NA	NA	Zm00001d014074_T001	3
zma-miR164a-3p	miR164	NoDiff	Predict	Zm00001d014460	NA	NA	NA	Zm00001d014460_T001	3
zma-miR164a-3p	miR164	NoDiff	Predict	Zm00001d015300	NA	NA	NA	Zm00001d015300_T003	3
zma-miR164a-3p	miR164	NoDiff	Predict	Zm00001d017157	NA	NA	NA	Zm00001d017157_T001	3
zma-miR164a-3p	miR164	NoDiff	Predict	Zm00001d017618	NA	NA	NA	Zm00001d017618_T001	3
zma-miR164a-3p	miR164	NoDiff	Predict	Zm00001d021225	NA	NA	NA	Zm00001d021225_T004	3
zma-miR164a-3p	miR164	NoDiff	Predict	Zm00001d021826	NA	NA	NA	Zm00001d021826_T001	2.5
zma-miR164a-3p	miR164	NoDiff	Predict	Zm00001d025554	NA	NA	NA	Zm00001d025554_T001	2
zma-miR164a-3p	miR164	NoDiff	Predict	Zm00001d026094	NA	NA	NA	Zm00001d026094_T001	2.5
zma-miR164a-3p	miR164	NoDiff	Predict	Zm00001d027268	NA	NA	NA	Zm00001d027268_T001	3
zma-miR164a-3p	miR164	NoDiff	Predict	Zm00001d027409	NA	NA	NA	Zm00001d027409_T001	3
zma-miR164a-3p	miR164	NoDiff	Predict	Zm00001d028032	NA	NA	NA	Zm00001d028032_T001	2
zma-miR164a-3p	miR164	NoDiff	Predict	Zm00001d028627	NA	NA	NA	Zm00001d028627_T002	3
zma-miR164a-3p	miR164	NoDiff	Predict	Zm00001d029004	NA	NA	NA	Zm00001d029004_T019	3
zma-miR164a-3p	miR164	NoDiff	Predict	Zm00001d029749	NA	NA	NA	Zm00001d029749_T001	3
zma-miR164a-3p	miR164	NoDiff	Predict	Zm00001d031173	NA	NA	NA	Zm00001d031173_T001	3
zma-miR164a-3p	miR164	NoDiff	Predict	Zm00001d032768	NA	NA	NA	Zm00001d032768_T005	2
zma-miR164a-3p	miR164	NoDiff	Predict	Zm00001d033982	NA	NA	NA	Zm00001d033982_T019	3
zma-miR164a-3p	miR164	NoDiff	Predict	Zm00001d035467	NA	NA	NA	Zm00001d035467_T001	3
zma-miR164a-3p	miR164	NoDiff	Predict	Zm00001d036475	NA	NA	NA	Zm00001d036475_T001	3
zma-miR164a-3p	miR164	NoDiff	Predict	Zm00001d044287	NA	NA	NA	Zm00001d044287_T002	3
zma-miR164a-3p	miR164	NoDiff	Predict	Zm00001d045185	NA	NA	NA	Zm00001d045185_T001	2.5
zma-miR164a-3p	miR164	NoDiff	Predict	Zm00001d047359	NA	NA	NA	Zm00001d047359_T001	3
zma-miR164a-3p	miR164	NoDiff	Predict	Zm00001d048494	NA	NA	NA	Zm00001d048494_T002	1.5
zma-miR164a-3p	miR164	NoDiff	Predict	Zm00001d048815	NA	NA	NA	Zm00001d048815_T001	3
zma-miR164a-3p	miR164	NoDiff	Predict	Zm00001d049578	NA	NA	NA	Zm00001d049578_T001	2.5
zma-miR164a-3p	miR164	NoDiff	Predict	Zm00001d051471	NA	NA	NA	Zm00001d051471_T001	3
zma-miR164a-5p	miR164	DLPE	Predict	Zm00001d002101	NA	NA	NA	Zm00001d002101_T001	3
zma-miR164a-5p	miR164	DLPE	Predict	Zm00001d003414	NA	NA	NA	Zm00001d003414_T002	2
zma-miR164a-5p	miR164	DLPE	Predict	Zm00001d006751	NA	NA	NA	Zm00001d006751_T007	3
zma-miR164a-5p	miR164	DLPE	Predict	Zm00001d006825	NA	NA	NA	Zm00001d006825_T001	2.5
zma-miR164a-5p	miR164	DLPE	Predict	Zm00001d007132	NA	NA	NA	Zm00001d007132_T001	3
zma-miR164a-5p	miR164	DLPE	Predict	Zm00001d008528	NA	NA	NA	Zm00001d008528_T001	2.5
zma-miR164a-5p	miR164	DLPE	Predict	Zm00001d012566	NA	NA	NA	Zm00001d012566_T001	2.5
zma-miR164a-5p	miR164	DLPE	Predict	Zm00001d013818	NA	NA	NA	Zm00001d013818_T001	3
zma-miR164a-5p	miR164	DLPE	Predict	Zm00001d014135	NA	NA	NA	Zm00001d014135_T001	2
zma-miR164a-5p	miR164	DLPE	Predict	Zm00001d014405	NA	NA	NA	Zm00001d014405_T001	1
zma-miR164a-5p	miR164	DLPE	Predict	Zm00001d016950	NA	NA	NA	Zm00001d016950_T001	1.5
zma-miR164a-5p	miR164	DLPE	Predict	Zm00001d019044	NA	NA	NA	Zm00001d019044_T001	2
zma-miR164a-5p	miR164	DLPE	Predict	Zm00001d019376	NA	NA	NA	Zm00001d019376_T010	3
zma-miR164a-5p	miR164	DLPE	Predict	Zm00001d020685	NA	NA	NA	Zm00001d020685_T005	2.5
zma-miR164a-5p	miR164	DLPE	Predict	Zm00001d021821	NA	NA	NA	Zm00001d021821_T001	3
zma-miR164a-5p	miR164	DLPE	Predict	Zm00001d022384	NA	NA	NA	Zm00001d022384_T003	3
zma-miR164a-5p	miR164	DLPE	Predict	Zm00001d022491	NA	NA	NA	Zm00001d022491_T015	3
zma-miR164a-5p	miR164	DLPE	Predict	Zm00001d023416	NA	NA	NA	Zm00001d023416_T001	3
zma-miR164a-5p	miR164	DLPE	Predict	Zm00001d027387	NA	NA	NA	Zm00001d027387_T001	3
zma-miR164a-5p	miR164	DLPE	Predict	Zm00001d028759	NA	NA	NA	Zm00001d028759_T001	3
zma-miR164a-5p	miR164	DLPE	Predict	Zm00001d030561	NA	NA	NA	Zm00001d030561_T004	2.5
zma-miR164a-5p	miR164	DLPE	Predict	Zm00001d034701	NA	NA	NA	Zm00001d034701_T004	3
zma-miR164a-5p	miR164	DLPE	Both	Zm00001d035266	Zm00001d035266_T001	0	0.000561581	Zm00001d035266_T001	1
zma-miR164a-5p	miR164	DLPE	Predict	Zm00001d036968	NA	NA	NA	Zm00001d036968_T019	2.5
zma-miR164a-5p	miR164	DLPE	Predict	Zm00001d038726	NA	NA	NA	Zm00001d038726_T001	3
zma-miR164a-5p	miR164	DLPE	Predict	Zm00001d038852	NA	NA	NA	Zm00001d038852_T001	3
zma-miR164a-5p	miR164	DLPE	Predict	Zm00001d040019	NA	NA	NA	Zm00001d040019_T001	2.5
zma-miR164a-5p	miR164	DLPE	Predict	Zm00001d040285	NA	NA	NA	Zm00001d040285_T001	3
zma-miR164a-5p	miR164	DLPE	Predict	Zm00001d040411	NA	NA	NA	Zm00001d040411_T003	2.5
zma-miR164a-5p	miR164	DLPE	Predict	Zm00001d041472	NA	NA	NA	Zm00001d041472_T001	1
zma-miR164a-5p	miR164	DLPE	Predict	Zm00001d041791	NA	NA	NA	Zm00001d041791_T001	1
zma-miR164a-5p	miR164	DLPE	Predict	Zm00001d042438	NA	NA	NA	Zm00001d042438_T001	2.5
zma-miR164a-5p	miR164	DLPE	Predict	Zm00001d042670	NA	NA	NA	Zm00001d042670_T005	3
zma-miR164a-5p	miR164	DLPE	Predict	Zm00001d043152	NA	NA	NA	Zm00001d043152_T006	2.5
zma-miR164a-5p	miR164	DLPE	Predict	Zm00001d045456	NA	NA	NA	Zm00001d045456_T001	3
zma-miR164a-5p	miR164	DLPE	Predict	Zm00001d046372	NA	NA	NA	Zm00001d046372_T002	3
zma-miR164a-5p	miR164	DLPE	Predict	Zm00001d046683	NA	NA	NA	Zm00001d046683_T002	3
zma-miR164a-5p	miR164	DLPE	Predict	Zm00001d047973	NA	NA	NA	Zm00001d047973_T006	3
zma-miR164a-5p	miR164	DLPE	Predict	Zm00001d048495	NA	NA	NA	Zm00001d048495_T001	3
zma-miR164a-5p	miR164	DLPE	Predict	Zm00001d049171	NA	NA	NA	Zm00001d049171_T002	2.5
zma-miR164a-5p	miR164	DLPE	Predict	Zm00001d050043	NA	NA	NA	Zm00001d050043_T002	2.5
zma-miR164a-5p	miR164	DLPE	Predict	Zm00001d050893	NA	NA	NA	Zm00001d050893_T001	1.5
zma-miR164a-5p	miR164	DLPE	Predict	Zm00001d053727	NA	NA	NA	Zm00001d053727_T004	3
zma-miR164b-3p	miR164	AE	Predict	Zm00001d003812	NA	NA	NA	Zm00001d003812_T002	3
zma-miR164b-3p	miR164	AE	Predict	Zm00001d007610	NA	NA	NA	Zm00001d007610_T003	3
zma-miR164b-3p	miR164	AE	Predict	Zm00001d009660	NA	NA	NA	Zm00001d009660_T001	3
zma-miR164b-3p	miR164	AE	Predict	Zm00001d010173	NA	NA	NA	Zm00001d010173_T005	3
zma-miR164b-3p	miR164	AE	Predict	Zm00001d010997	NA	NA	NA	Zm00001d010997_T001	3
zma-miR164b-3p	miR164	AE	Predict	Zm00001d015747	NA	NA	NA	Zm00001d015747_T003	2
zma-miR164b-3p	miR164	AE	Predict	Zm00001d017799	NA	NA	NA	Zm00001d017799_T001	3
zma-miR164b-3p	miR164	AE	Predict	Zm00001d018058	NA	NA	NA	Zm00001d018058_T001	2.5
zma-miR164b-3p	miR164	AE	Predict	Zm00001d018943	NA	NA	NA	Zm00001d018943_T002	2.5
zma-miR164b-3p	miR164	AE	Predict	Zm00001d020062	NA	NA	NA	Zm00001d020062_T001	3
zma-miR164b-3p	miR164	AE	Predict	Zm00001d023555	NA	NA	NA	Zm00001d023555_T001	3
zma-miR164b-3p	miR164	AE	Predict	Zm00001d024894	NA	NA	NA	Zm00001d024894_T008	2
zma-miR164b-3p	miR164	AE	Predict	Zm00001d025342	NA	NA	NA	Zm00001d025342_T003	2
zma-miR164b-3p	miR164	AE	Predict	Zm00001d026426	NA	NA	NA	Zm00001d026426_T005	3
zma-miR164b-3p	miR164	AE	Predict	Zm00001d034797	NA	NA	NA	Zm00001d034797_T004	3
zma-miR164b-3p	miR164	AE	Predict	Zm00001d035124	NA	NA	NA	Zm00001d035124_T001	3
zma-miR164b-3p	miR164	AE	Predict	Zm00001d035143	NA	NA	NA	Zm00001d035143_T001	3
zma-miR164b-3p	miR164	AE	Predict	Zm00001d035145	NA	NA	NA	Zm00001d035145_T001	3
zma-miR164b-3p	miR164	AE	Predict	Zm00001d035294	NA	NA	NA	Zm00001d035294_T001	3
zma-miR164b-3p	miR164	AE	Predict	Zm00001d038318	NA	NA	NA	Zm00001d038318_T009	3
zma-miR164b-3p	miR164	AE	Predict	Zm00001d048904	NA	NA	NA	Zm00001d048904_T001	2.5
zma-miR164b-5p	miR164	DLPE	Predict	Zm00001d002101	NA	NA	NA	Zm00001d002101_T001	3
zma-miR164b-5p	miR164	DLPE	Predict	Zm00001d003414	NA	NA	NA	Zm00001d003414_T002	2
zma-miR164b-5p	miR164	DLPE	Predict	Zm00001d006751	NA	NA	NA	Zm00001d006751_T007	3
zma-miR164b-5p	miR164	DLPE	Predict	Zm00001d006825	NA	NA	NA	Zm00001d006825_T001	2.5
zma-miR164b-5p	miR164	DLPE	Predict	Zm00001d007132	NA	NA	NA	Zm00001d007132_T001	3
zma-miR164b-5p	miR164	DLPE	Predict	Zm00001d008528	NA	NA	NA	Zm00001d008528_T001	2.5
zma-miR164b-5p	miR164	DLPE	Predict	Zm00001d012566	NA	NA	NA	Zm00001d012566_T001	2.5
zma-miR164b-5p	miR164	DLPE	Predict	Zm00001d013818	NA	NA	NA	Zm00001d013818_T001	3
zma-miR164b-5p	miR164	DLPE	Predict	Zm00001d014135	NA	NA	NA	Zm00001d014135_T001	2
zma-miR164b-5p	miR164	DLPE	Predict	Zm00001d014405	NA	NA	NA	Zm00001d014405_T001	1
zma-miR164b-5p	miR164	DLPE	Predict	Zm00001d016950	NA	NA	NA	Zm00001d016950_T001	1.5
zma-miR164b-5p	miR164	DLPE	Predict	Zm00001d019044	NA	NA	NA	Zm00001d019044_T001	2
zma-miR164b-5p	miR164	DLPE	Predict	Zm00001d019376	NA	NA	NA	Zm00001d019376_T010	3
zma-miR164b-5p	miR164	DLPE	Predict	Zm00001d020685	NA	NA	NA	Zm00001d020685_T005	2.5
zma-miR164b-5p	miR164	DLPE	Predict	Zm00001d021821	NA	NA	NA	Zm00001d021821_T001	3
zma-miR164b-5p	miR164	DLPE	Predict	Zm00001d022384	NA	NA	NA	Zm00001d022384_T003	3
zma-miR164b-5p	miR164	DLPE	Predict	Zm00001d022491	NA	NA	NA	Zm00001d022491_T015	3
zma-miR164b-5p	miR164	DLPE	Predict	Zm00001d023416	NA	NA	NA	Zm00001d023416_T001	3
zma-miR164b-5p	miR164	DLPE	Predict	Zm00001d027387	NA	NA	NA	Zm00001d027387_T001	3
zma-miR164b-5p	miR164	DLPE	Predict	Zm00001d028759	NA	NA	NA	Zm00001d028759_T001	3
zma-miR164b-5p	miR164	DLPE	Predict	Zm00001d030561	NA	NA	NA	Zm00001d030561_T004	2.5
zma-miR164b-5p	miR164	DLPE	Predict	Zm00001d034701	NA	NA	NA	Zm00001d034701_T004	3
zma-miR164b-5p	miR164	DLPE	Both	Zm00001d035266	Zm00001d035266_T001	0	0.000561581	Zm00001d035266_T001	1
zma-miR164b-5p	miR164	DLPE	Predict	Zm00001d036968	NA	NA	NA	Zm00001d036968_T019	2.5
zma-miR164b-5p	miR164	DLPE	Predict	Zm00001d038726	NA	NA	NA	Zm00001d038726_T001	3
zma-miR164b-5p	miR164	DLPE	Predict	Zm00001d038852	NA	NA	NA	Zm00001d038852_T001	3
zma-miR164b-5p	miR164	DLPE	Predict	Zm00001d040019	NA	NA	NA	Zm00001d040019_T001	2.5
zma-miR164b-5p	miR164	DLPE	Predict	Zm00001d040285	NA	NA	NA	Zm00001d040285_T001	3
zma-miR164b-5p	miR164	DLPE	Predict	Zm00001d040411	NA	NA	NA	Zm00001d040411_T003	2.5
zma-miR164b-5p	miR164	DLPE	Predict	Zm00001d041472	NA	NA	NA	Zm00001d041472_T001	1
zma-miR164b-5p	miR164	DLPE	Predict	Zm00001d041791	NA	NA	NA	Zm00001d041791_T001	1
zma-miR164b-5p	miR164	DLPE	Predict	Zm00001d042438	NA	NA	NA	Zm00001d042438_T001	2.5
zma-miR164b-5p	miR164	DLPE	Predict	Zm00001d042670	NA	NA	NA	Zm00001d042670_T005	3
zma-miR164b-5p	miR164	DLPE	Predict	Zm00001d043152	NA	NA	NA	Zm00001d043152_T006	2.5
zma-miR164b-5p	miR164	DLPE	Predict	Zm00001d045456	NA	NA	NA	Zm00001d045456_T001	3
zma-miR164b-5p	miR164	DLPE	Predict	Zm00001d046372	NA	NA	NA	Zm00001d046372_T002	3
zma-miR164b-5p	miR164	DLPE	Predict	Zm00001d046683	NA	NA	NA	Zm00001d046683_T002	3
zma-miR164b-5p	miR164	DLPE	Predict	Zm00001d047973	NA	NA	NA	Zm00001d047973_T006	3
zma-miR164b-5p	miR164	DLPE	Predict	Zm00001d048495	NA	NA	NA	Zm00001d048495_T001	3
zma-miR164b-5p	miR164	DLPE	Predict	Zm00001d049171	NA	NA	NA	Zm00001d049171_T002	2.5
zma-miR164b-5p	miR164	DLPE	Predict	Zm00001d050043	NA	NA	NA	Zm00001d050043_T002	2.5
zma-miR164b-5p	miR164	DLPE	Predict	Zm00001d050893	NA	NA	NA	Zm00001d050893_T001	1.5
zma-miR164b-5p	miR164	DLPE	Predict	Zm00001d053727	NA	NA	NA	Zm00001d053727_T004	3
zma-miR164c-3p	miR164	AE	Predict	Zm00001d002965	NA	NA	NA	Zm00001d002965_T001	3
zma-miR164c-3p	miR164	AE	Predict	Zm00001d004851	NA	NA	NA	Zm00001d004851_T001	2.5
zma-miR164c-3p	miR164	AE	Predict	Zm00001d004861	NA	NA	NA	Zm00001d004861_T004	2.5
zma-miR164c-3p	miR164	AE	Predict	Zm00001d009205	NA	NA	NA	Zm00001d009205_T003	2.5
zma-miR164c-3p	miR164	AE	Predict	Zm00001d010975	NA	NA	NA	Zm00001d010975_T005	2.5
zma-miR164c-3p	miR164	AE	Predict	Zm00001d011847	NA	NA	NA	Zm00001d011847_T001	2.5
zma-miR164c-3p	miR164	AE	Predict	Zm00001d014074	NA	NA	NA	Zm00001d014074_T001	3
zma-miR164c-3p	miR164	AE	Predict	Zm00001d021785	NA	NA	NA	Zm00001d021785_T027	3
zma-miR164c-3p	miR164	AE	Predict	Zm00001d027738	NA	NA	NA	Zm00001d027738_T001	3
zma-miR164c-3p	miR164	AE	Predict	Zm00001d029366	NA	NA	NA	Zm00001d029366_T002	3
zma-miR164c-3p	miR164	AE	Predict	Zm00001d029850	NA	NA	NA	Zm00001d029850_T001	2.5
zma-miR164c-3p	miR164	AE	Predict	Zm00001d031711	NA	NA	NA	Zm00001d031711_T001	2.5
zma-miR164c-3p	miR164	AE	Predict	Zm00001d032768	NA	NA	NA	Zm00001d032768_T005	2
zma-miR164c-3p	miR164	AE	Predict	Zm00001d035492	NA	NA	NA	Zm00001d035492_T008	2.5
zma-miR164c-3p	miR164	AE	Predict	Zm00001d048421	NA	NA	NA	Zm00001d048421_T001	3
zma-miR164c-3p	miR164	AE	Predict	Zm00001d052442	NA	NA	NA	Zm00001d052442_T001	3
zma-miR164c-5p	miR164	DLPE	Predict	Zm00001d002101	NA	NA	NA	Zm00001d002101_T001	3
zma-miR164c-5p	miR164	DLPE	Predict	Zm00001d003414	NA	NA	NA	Zm00001d003414_T002	2
zma-miR164c-5p	miR164	DLPE	Predict	Zm00001d006751	NA	NA	NA	Zm00001d006751_T007	3
zma-miR164c-5p	miR164	DLPE	Predict	Zm00001d006825	NA	NA	NA	Zm00001d006825_T001	2.5
zma-miR164c-5p	miR164	DLPE	Predict	Zm00001d007132	NA	NA	NA	Zm00001d007132_T001	3
zma-miR164c-5p	miR164	DLPE	Predict	Zm00001d008528	NA	NA	NA	Zm00001d008528_T001	2.5
zma-miR164c-5p	miR164	DLPE	Predict	Zm00001d012566	NA	NA	NA	Zm00001d012566_T001	2.5
zma-miR164c-5p	miR164	DLPE	Predict	Zm00001d013818	NA	NA	NA	Zm00001d013818_T001	3
zma-miR164c-5p	miR164	DLPE	Predict	Zm00001d014135	NA	NA	NA	Zm00001d014135_T001	2
zma-miR164c-5p	miR164	DLPE	Predict	Zm00001d014405	NA	NA	NA	Zm00001d014405_T001	1
zma-miR164c-5p	miR164	DLPE	Predict	Zm00001d016950	NA	NA	NA	Zm00001d016950_T001	1.5
zma-miR164c-5p	miR164	DLPE	Predict	Zm00001d019044	NA	NA	NA	Zm00001d019044_T001	2
zma-miR164c-5p	miR164	DLPE	Predict	Zm00001d019376	NA	NA	NA	Zm00001d019376_T010	3
zma-miR164c-5p	miR164	DLPE	Predict	Zm00001d020685	NA	NA	NA	Zm00001d020685_T005	2.5
zma-miR164c-5p	miR164	DLPE	Predict	Zm00001d021821	NA	NA	NA	Zm00001d021821_T001	3
zma-miR164c-5p	miR164	DLPE	Predict	Zm00001d022384	NA	NA	NA	Zm00001d022384_T003	3
zma-miR164c-5p	miR164	DLPE	Predict	Zm00001d022491	NA	NA	NA	Zm00001d022491_T015	3
zma-miR164c-5p	miR164	DLPE	Predict	Zm00001d023416	NA	NA	NA	Zm00001d023416_T001	3
zma-miR164c-5p	miR164	DLPE	Predict	Zm00001d027387	NA	NA	NA	Zm00001d027387_T001	3
zma-miR164c-5p	miR164	DLPE	Predict	Zm00001d028759	NA	NA	NA	Zm00001d028759_T001	3
zma-miR164c-5p	miR164	DLPE	Predict	Zm00001d030561	NA	NA	NA	Zm00001d030561_T004	2.5
zma-miR164c-5p	miR164	DLPE	Predict	Zm00001d034701	NA	NA	NA	Zm00001d034701_T004	3
zma-miR164c-5p	miR164	DLPE	Both	Zm00001d035266	Zm00001d035266_T001	0	0.000561581	Zm00001d035266_T001	1
zma-miR164c-5p	miR164	DLPE	Predict	Zm00001d036968	NA	NA	NA	Zm00001d036968_T019	2.5
zma-miR164c-5p	miR164	DLPE	Predict	Zm00001d038726	NA	NA	NA	Zm00001d038726_T001	3
zma-miR164c-5p	miR164	DLPE	Predict	Zm00001d038852	NA	NA	NA	Zm00001d038852_T001	3
zma-miR164c-5p	miR164	DLPE	Predict	Zm00001d040019	NA	NA	NA	Zm00001d040019_T001	2.5
zma-miR164c-5p	miR164	DLPE	Predict	Zm00001d040285	NA	NA	NA	Zm00001d040285_T001	3
zma-miR164c-5p	miR164	DLPE	Predict	Zm00001d040411	NA	NA	NA	Zm00001d040411_T003	2.5
zma-miR164c-5p	miR164	DLPE	Predict	Zm00001d041472	NA	NA	NA	Zm00001d041472_T001	1
zma-miR164c-5p	miR164	DLPE	Predict	Zm00001d041791	NA	NA	NA	Zm00001d041791_T001	1
zma-miR164c-5p	miR164	DLPE	Predict	Zm00001d042438	NA	NA	NA	Zm00001d042438_T001	2.5
zma-miR164c-5p	miR164	DLPE	Predict	Zm00001d042670	NA	NA	NA	Zm00001d042670_T005	3
zma-miR164c-5p	miR164	DLPE	Predict	Zm00001d043152	NA	NA	NA	Zm00001d043152_T006	2.5
zma-miR164c-5p	miR164	DLPE	Predict	Zm00001d045456	NA	NA	NA	Zm00001d045456_T001	3
zma-miR164c-5p	miR164	DLPE	Predict	Zm00001d046372	NA	NA	NA	Zm00001d046372_T002	3
zma-miR164c-5p	miR164	DLPE	Predict	Zm00001d046683	NA	NA	NA	Zm00001d046683_T002	3
zma-miR164c-5p	miR164	DLPE	Predict	Zm00001d047973	NA	NA	NA	Zm00001d047973_T006	3
zma-miR164c-5p	miR164	DLPE	Predict	Zm00001d048495	NA	NA	NA	Zm00001d048495_T001	3
zma-miR164c-5p	miR164	DLPE	Predict	Zm00001d049171	NA	NA	NA	Zm00001d049171_T002	2.5
zma-miR164c-5p	miR164	DLPE	Predict	Zm00001d050043	NA	NA	NA	Zm00001d050043_T002	2.5
zma-miR164c-5p	miR164	DLPE	Predict	Zm00001d050893	NA	NA	NA	Zm00001d050893_T001	1.5
zma-miR164c-5p	miR164	DLPE	Predict	Zm00001d053727	NA	NA	NA	Zm00001d053727_T004	3
zma-miR164d-3p	miR164	NoDiff	Predict	Zm00001d006649	NA	NA	NA	Zm00001d006649_T001	2.5
zma-miR164d-3p	miR164	NoDiff	Predict	Zm00001d009390	NA	NA	NA	Zm00001d009390_T001	2
zma-miR164d-3p	miR164	NoDiff	Predict	Zm00001d012701	NA	NA	NA	Zm00001d012701_T014	3
zma-miR164d-3p	miR164	NoDiff	Predict	Zm00001d014039	NA	NA	NA	Zm00001d014039_T001	2.5
zma-miR164d-3p	miR164	NoDiff	Predict	Zm00001d019259	NA	NA	NA	Zm00001d019259_T001	3
zma-miR164d-3p	miR164	NoDiff	Predict	Zm00001d020088	NA	NA	NA	Zm00001d020088_T025	2.5
zma-miR164d-3p	miR164	NoDiff	Predict	Zm00001d024927	NA	NA	NA	Zm00001d024927_T002	3
zma-miR164d-3p	miR164	NoDiff	Predict	Zm00001d028627	NA	NA	NA	Zm00001d028627_T002	2
zma-miR164d-3p	miR164	NoDiff	Predict	Zm00001d029718	NA	NA	NA	Zm00001d029718_T001	3
zma-miR164d-3p	miR164	NoDiff	Predict	Zm00001d032637	NA	NA	NA	Zm00001d032637_T004	2.5
zma-miR164d-3p	miR164	NoDiff	Predict	Zm00001d032768	NA	NA	NA	Zm00001d032768_T005	3
zma-miR164d-3p	miR164	NoDiff	Predict	Zm00001d036475	NA	NA	NA	Zm00001d036475_T001	2
zma-miR164d-3p	miR164	NoDiff	Predict	Zm00001d038528	NA	NA	NA	Zm00001d038528_T001	3
zma-miR164d-3p	miR164	NoDiff	Predict	Zm00001d044395	NA	NA	NA	Zm00001d044395_T001	3
zma-miR164d-3p	miR164	NoDiff	Predict	Zm00001d046537	NA	NA	NA	Zm00001d046537_T002	3
zma-miR164d-3p	miR164	NoDiff	Predict	Zm00001d048494	NA	NA	NA	Zm00001d048494_T002	2.5
zma-miR164d-5p	miR164	DLPE	Predict	Zm00001d002101	NA	NA	NA	Zm00001d002101_T001	3
zma-miR164d-5p	miR164	DLPE	Predict	Zm00001d003414	NA	NA	NA	Zm00001d003414_T002	2
zma-miR164d-5p	miR164	DLPE	Predict	Zm00001d006751	NA	NA	NA	Zm00001d006751_T007	3
zma-miR164d-5p	miR164	DLPE	Predict	Zm00001d006825	NA	NA	NA	Zm00001d006825_T001	2.5
zma-miR164d-5p	miR164	DLPE	Predict	Zm00001d007132	NA	NA	NA	Zm00001d007132_T001	3
zma-miR164d-5p	miR164	DLPE	Predict	Zm00001d008528	NA	NA	NA	Zm00001d008528_T001	2.5
zma-miR164d-5p	miR164	DLPE	Predict	Zm00001d012566	NA	NA	NA	Zm00001d012566_T001	2.5
zma-miR164d-5p	miR164	DLPE	Predict	Zm00001d013818	NA	NA	NA	Zm00001d013818_T001	3
zma-miR164d-5p	miR164	DLPE	Predict	Zm00001d014135	NA	NA	NA	Zm00001d014135_T001	2
zma-miR164d-5p	miR164	DLPE	Predict	Zm00001d014405	NA	NA	NA	Zm00001d014405_T001	1
zma-miR164d-5p	miR164	DLPE	Predict	Zm00001d016950	NA	NA	NA	Zm00001d016950_T001	1.5
zma-miR164d-5p	miR164	DLPE	Predict	Zm00001d019044	NA	NA	NA	Zm00001d019044_T001	2
zma-miR164d-5p	miR164	DLPE	Predict	Zm00001d019376	NA	NA	NA	Zm00001d019376_T010	3
zma-miR164d-5p	miR164	DLPE	Predict	Zm00001d020685	NA	NA	NA	Zm00001d020685_T005	2.5
zma-miR164d-5p	miR164	DLPE	Predict	Zm00001d021821	NA	NA	NA	Zm00001d021821_T001	3
zma-miR164d-5p	miR164	DLPE	Predict	Zm00001d022384	NA	NA	NA	Zm00001d022384_T003	3
zma-miR164d-5p	miR164	DLPE	Predict	Zm00001d022491	NA	NA	NA	Zm00001d022491_T015	3
zma-miR164d-5p	miR164	DLPE	Predict	Zm00001d023416	NA	NA	NA	Zm00001d023416_T001	3
zma-miR164d-5p	miR164	DLPE	Predict	Zm00001d027387	NA	NA	NA	Zm00001d027387_T001	3
zma-miR164d-5p	miR164	DLPE	Predict	Zm00001d028759	NA	NA	NA	Zm00001d028759_T001	3
zma-miR164d-5p	miR164	DLPE	Predict	Zm00001d030561	NA	NA	NA	Zm00001d030561_T004	2.5
zma-miR164d-5p	miR164	DLPE	Predict	Zm00001d034701	NA	NA	NA	Zm00001d034701_T004	3
zma-miR164d-5p	miR164	DLPE	Both	Zm00001d035266	Zm00001d035266_T001	0	0.000561581	Zm00001d035266_T001	1
zma-miR164d-5p	miR164	DLPE	Predict	Zm00001d036968	NA	NA	NA	Zm00001d036968_T019	2.5
zma-miR164d-5p	miR164	DLPE	Predict	Zm00001d038726	NA	NA	NA	Zm00001d038726_T001	3
zma-miR164d-5p	miR164	DLPE	Predict	Zm00001d038852	NA	NA	NA	Zm00001d038852_T001	3
zma-miR164d-5p	miR164	DLPE	Predict	Zm00001d040019	NA	NA	NA	Zm00001d040019_T001	2.5
zma-miR164d-5p	miR164	DLPE	Predict	Zm00001d040285	NA	NA	NA	Zm00001d040285_T001	3
zma-miR164d-5p	miR164	DLPE	Predict	Zm00001d040411	NA	NA	NA	Zm00001d040411_T003	2.5
zma-miR164d-5p	miR164	DLPE	Predict	Zm00001d041472	NA	NA	NA	Zm00001d041472_T001	1
zma-miR164d-5p	miR164	DLPE	Predict	Zm00001d041791	NA	NA	NA	Zm00001d041791_T001	1
zma-miR164d-5p	miR164	DLPE	Predict	Zm00001d042438	NA	NA	NA	Zm00001d042438_T001	2.5
zma-miR164d-5p	miR164	DLPE	Predict	Zm00001d042670	NA	NA	NA	Zm00001d042670_T005	3
zma-miR164d-5p	miR164	DLPE	Predict	Zm00001d043152	NA	NA	NA	Zm00001d043152_T006	2.5
zma-miR164d-5p	miR164	DLPE	Predict	Zm00001d045456	NA	NA	NA	Zm00001d045456_T001	3
zma-miR164d-5p	miR164	DLPE	Predict	Zm00001d046372	NA	NA	NA	Zm00001d046372_T002	3
zma-miR164d-5p	miR164	DLPE	Predict	Zm00001d046683	NA	NA	NA	Zm00001d046683_T002	3
zma-miR164d-5p	miR164	DLPE	Predict	Zm00001d047973	NA	NA	NA	Zm00001d047973_T006	3
zma-miR164d-5p	miR164	DLPE	Predict	Zm00001d048495	NA	NA	NA	Zm00001d048495_T001	3
zma-miR164d-5p	miR164	DLPE	Predict	Zm00001d049171	NA	NA	NA	Zm00001d049171_T002	2.5
zma-miR164d-5p	miR164	DLPE	Predict	Zm00001d050043	NA	NA	NA	Zm00001d050043_T002	2.5
zma-miR164d-5p	miR164	DLPE	Predict	Zm00001d050893	NA	NA	NA	Zm00001d050893_T001	1.5
zma-miR164d-5p	miR164	DLPE	Predict	Zm00001d053727	NA	NA	NA	Zm00001d053727_T004	3
zma-miR164e-3p	miR164	NoDiff	Predict	Zm00001d004525	NA	NA	NA	Zm00001d004525_T001	3
zma-miR164e-3p	miR164	NoDiff	Predict	Zm00001d010690	NA	NA	NA	Zm00001d010690_T001	3
zma-miR164e-3p	miR164	NoDiff	Predict	Zm00001d014726	NA	NA	NA	Zm00001d014726_T005	3
zma-miR164e-3p	miR164	NoDiff	Predict	Zm00001d053828	NA	NA	NA	Zm00001d053828_T001	3
zma-miR164e-5p	miR164	NoDiff	Predict	Zm00001d003079	NA	NA	NA	Zm00001d003079_T001	3
zma-miR164e-5p	miR164	NoDiff	Predict	Zm00001d003414	NA	NA	NA	Zm00001d003414_T001	2
zma-miR164e-5p	miR164	NoDiff	Predict	Zm00001d005751	NA	NA	NA	Zm00001d005751_T001	3
zma-miR164e-5p	miR164	NoDiff	Predict	Zm00001d013818	NA	NA	NA	Zm00001d013818_T001	2.5
zma-miR164e-5p	miR164	NoDiff	Predict	Zm00001d014405	NA	NA	NA	Zm00001d014405_T001	2.5
zma-miR164e-5p	miR164	NoDiff	Predict	Zm00001d016950	NA	NA	NA	Zm00001d016950_T002	1.5
zma-miR164e-5p	miR164	NoDiff	Predict	Zm00001d017246	NA	NA	NA	Zm00001d017246_T001	3
zma-miR164e-5p	miR164	NoDiff	Predict	Zm00001d020561	NA	NA	NA	Zm00001d020561_T005	3
zma-miR164e-5p	miR164	NoDiff	Predict	Zm00001d024268	NA	NA	NA	Zm00001d024268_T001	3
zma-miR164e-5p	miR164	NoDiff	Predict	Zm00001d025590	NA	NA	NA	Zm00001d025590_T011	3
zma-miR164e-5p	miR164	NoDiff	Predict	Zm00001d025824	NA	NA	NA	Zm00001d025824_T001	3
zma-miR164e-5p	miR164	NoDiff	Predict	Zm00001d032681	NA	NA	NA	Zm00001d032681_T003	3
zma-miR164e-5p	miR164	NoDiff	Predict	Zm00001d034701	NA	NA	NA	Zm00001d034701_T026	2.5
zma-miR164e-5p	miR164	NoDiff	Predict	Zm00001d035266	NA	NA	NA	Zm00001d035266_T001	2.5
zma-miR164e-5p	miR164	NoDiff	Predict	Zm00001d036395	NA	NA	NA	Zm00001d036395_T007	3
zma-miR164e-5p	miR164	NoDiff	Predict	Zm00001d041472	NA	NA	NA	Zm00001d041472_T001	2.5
zma-miR164e-5p	miR164	NoDiff	Predict	Zm00001d041791	NA	NA	NA	Zm00001d041791_T001	2.5
zma-miR164e-5p	miR164	NoDiff	Predict	Zm00001d043180	NA	NA	NA	Zm00001d043180_T001	3
zma-miR164e-5p	miR164	NoDiff	Predict	Zm00001d045456	NA	NA	NA	Zm00001d045456_T001	2.5
zma-miR164e-5p	miR164	NoDiff	Predict	Zm00001d046479	NA	NA	NA	Zm00001d046479_T001	3
zma-miR164e-5p	miR164	NoDiff	Predict	Zm00001d046683	NA	NA	NA	Zm00001d046683_T008	2.5
zma-miR164e-5p	miR164	NoDiff	Predict	Zm00001d050893	NA	NA	NA	Zm00001d050893_T002	1.5
zma-miR164e-5p	miR164	NoDiff	Predict	Zm00001d052197	NA	NA	NA	Zm00001d052197_T016	3
zma-miR164f-5p	miR164	DLPE	Predict	Zm00001d002101	NA	NA	NA	Zm00001d002101_T001	3
zma-miR164f-5p	miR164	DLPE	Predict	Zm00001d003414	NA	NA	NA	Zm00001d003414_T002	2
zma-miR164f-5p	miR164	DLPE	Predict	Zm00001d006751	NA	NA	NA	Zm00001d006751_T007	3
zma-miR164f-5p	miR164	DLPE	Predict	Zm00001d006825	NA	NA	NA	Zm00001d006825_T001	2.5
zma-miR164f-5p	miR164	DLPE	Predict	Zm00001d007132	NA	NA	NA	Zm00001d007132_T001	3
zma-miR164f-5p	miR164	DLPE	Predict	Zm00001d008528	NA	NA	NA	Zm00001d008528_T001	2.5
zma-miR164f-5p	miR164	DLPE	Predict	Zm00001d012566	NA	NA	NA	Zm00001d012566_T001	2.5
zma-miR164f-5p	miR164	DLPE	Predict	Zm00001d013818	NA	NA	NA	Zm00001d013818_T001	3
zma-miR164f-5p	miR164	DLPE	Predict	Zm00001d014135	NA	NA	NA	Zm00001d014135_T001	2
zma-miR164f-5p	miR164	DLPE	Predict	Zm00001d014405	NA	NA	NA	Zm00001d014405_T001	1
zma-miR164f-5p	miR164	DLPE	Predict	Zm00001d016950	NA	NA	NA	Zm00001d016950_T001	1.5
zma-miR164f-5p	miR164	DLPE	Predict	Zm00001d019044	NA	NA	NA	Zm00001d019044_T001	2
zma-miR164f-5p	miR164	DLPE	Predict	Zm00001d019376	NA	NA	NA	Zm00001d019376_T010	3
zma-miR164f-5p	miR164	DLPE	Predict	Zm00001d020685	NA	NA	NA	Zm00001d020685_T005	2.5
zma-miR164f-5p	miR164	DLPE	Predict	Zm00001d021821	NA	NA	NA	Zm00001d021821_T001	3
zma-miR164f-5p	miR164	DLPE	Predict	Zm00001d022384	NA	NA	NA	Zm00001d022384_T003	3
zma-miR164f-5p	miR164	DLPE	Predict	Zm00001d022491	NA	NA	NA	Zm00001d022491_T015	3
zma-miR164f-5p	miR164	DLPE	Predict	Zm00001d023416	NA	NA	NA	Zm00001d023416_T001	3
zma-miR164f-5p	miR164	DLPE	Predict	Zm00001d027387	NA	NA	NA	Zm00001d027387_T001	3
zma-miR164f-5p	miR164	DLPE	Predict	Zm00001d028759	NA	NA	NA	Zm00001d028759_T001	3
zma-miR164f-5p	miR164	DLPE	Predict	Zm00001d030561	NA	NA	NA	Zm00001d030561_T004	2.5
zma-miR164f-5p	miR164	DLPE	Predict	Zm00001d034701	NA	NA	NA	Zm00001d034701_T004	3
zma-miR164f-5p	miR164	DLPE	Predict	Zm00001d035266	NA	NA	NA	Zm00001d035266_T001	1
zma-miR164f-5p	miR164	DLPE	Predict	Zm00001d036968	NA	NA	NA	Zm00001d036968_T019	2.5
zma-miR164f-5p	miR164	DLPE	Predict	Zm00001d038726	NA	NA	NA	Zm00001d038726_T001	3
zma-miR164f-5p	miR164	DLPE	Predict	Zm00001d038852	NA	NA	NA	Zm00001d038852_T001	3
zma-miR164f-5p	miR164	DLPE	Predict	Zm00001d040019	NA	NA	NA	Zm00001d040019_T001	2.5
zma-miR164f-5p	miR164	DLPE	Predict	Zm00001d040285	NA	NA	NA	Zm00001d040285_T001	3
zma-miR164f-5p	miR164	DLPE	Predict	Zm00001d040411	NA	NA	NA	Zm00001d040411_T003	2.5
zma-miR164f-5p	miR164	DLPE	Predict	Zm00001d041472	NA	NA	NA	Zm00001d041472_T001	1
zma-miR164f-5p	miR164	DLPE	Predict	Zm00001d041791	NA	NA	NA	Zm00001d041791_T001	1
zma-miR164f-5p	miR164	DLPE	Predict	Zm00001d042438	NA	NA	NA	Zm00001d042438_T001	2.5
zma-miR164f-5p	miR164	DLPE	Predict	Zm00001d042670	NA	NA	NA	Zm00001d042670_T005	3
zma-miR164f-5p	miR164	DLPE	Predict	Zm00001d043152	NA	NA	NA	Zm00001d043152_T006	2.5
zma-miR164f-5p	miR164	DLPE	Predict	Zm00001d045456	NA	NA	NA	Zm00001d045456_T001	3
zma-miR164f-5p	miR164	DLPE	Predict	Zm00001d046372	NA	NA	NA	Zm00001d046372_T002	3
zma-miR164f-5p	miR164	DLPE	Predict	Zm00001d046683	NA	NA	NA	Zm00001d046683_T002	3
zma-miR164f-5p	miR164	DLPE	Predict	Zm00001d047973	NA	NA	NA	Zm00001d047973_T006	3
zma-miR164f-5p	miR164	DLPE	Predict	Zm00001d048495	NA	NA	NA	Zm00001d048495_T001	3
zma-miR164f-5p	miR164	DLPE	Predict	Zm00001d049171	NA	NA	NA	Zm00001d049171_T002	2.5
zma-miR164f-5p	miR164	DLPE	Predict	Zm00001d050043	NA	NA	NA	Zm00001d050043_T002	2.5
zma-miR164f-5p	miR164	DLPE	Predict	Zm00001d050893	NA	NA	NA	Zm00001d050893_T001	1.5
zma-miR164f-5p	miR164	DLPE	Predict	Zm00001d053727	NA	NA	NA	Zm00001d053727_T004	3
zma-miR164g-3p	miR164	NoDiff	Predict	Zm00001d005769	NA	NA	NA	Zm00001d005769_T001	3
zma-miR164g-3p	miR164	NoDiff	Predict	Zm00001d009465	NA	NA	NA	Zm00001d009465_T003	3
zma-miR164g-3p	miR164	NoDiff	Predict	Zm00001d020512	NA	NA	NA	Zm00001d020512_T001	3
zma-miR164g-3p	miR164	NoDiff	Predict	Zm00001d032768	NA	NA	NA	Zm00001d032768_T005	3
zma-miR164g-3p	miR164	NoDiff	Predict	Zm00001d038905	NA	NA	NA	Zm00001d038905_T001	2.5
zma-miR164g-3p	miR164	NoDiff	Predict	Zm00001d043894	NA	NA	NA	Zm00001d043894_T001	3
zma-miR164g-3p	miR164	NoDiff	Predict	Zm00001d043955	NA	NA	NA	Zm00001d043955_T001	3
zma-miR164g-3p	miR164	NoDiff	Predict	Zm00001d048494	NA	NA	NA	Zm00001d048494_T002	2.5
zma-miR164g-3p	miR164	NoDiff	Predict	Zm00001d051246	NA	NA	NA	Zm00001d051246_T001	3
zma-miR164g-5p	miR164	DLPE	Predict	Zm00001d002101	NA	NA	NA	Zm00001d002101_T001	3
zma-miR164g-5p	miR164	DLPE	Predict	Zm00001d003414	NA	NA	NA	Zm00001d003414_T002	2
zma-miR164g-5p	miR164	DLPE	Predict	Zm00001d006751	NA	NA	NA	Zm00001d006751_T007	3
zma-miR164g-5p	miR164	DLPE	Predict	Zm00001d006825	NA	NA	NA	Zm00001d006825_T001	2.5
zma-miR164g-5p	miR164	DLPE	Predict	Zm00001d007132	NA	NA	NA	Zm00001d007132_T001	3
zma-miR164g-5p	miR164	DLPE	Predict	Zm00001d008528	NA	NA	NA	Zm00001d008528_T001	2.5
zma-miR164g-5p	miR164	DLPE	Predict	Zm00001d012566	NA	NA	NA	Zm00001d012566_T001	2.5
zma-miR164g-5p	miR164	DLPE	Predict	Zm00001d013818	NA	NA	NA	Zm00001d013818_T001	3
zma-miR164g-5p	miR164	DLPE	Predict	Zm00001d014135	NA	NA	NA	Zm00001d014135_T001	2
zma-miR164g-5p	miR164	DLPE	Predict	Zm00001d014405	NA	NA	NA	Zm00001d014405_T001	1
zma-miR164g-5p	miR164	DLPE	Predict	Zm00001d016950	NA	NA	NA	Zm00001d016950_T001	1.5
zma-miR164g-5p	miR164	DLPE	Predict	Zm00001d019044	NA	NA	NA	Zm00001d019044_T001	2
zma-miR164g-5p	miR164	DLPE	Predict	Zm00001d019376	NA	NA	NA	Zm00001d019376_T010	3
zma-miR164g-5p	miR164	DLPE	Predict	Zm00001d020685	NA	NA	NA	Zm00001d020685_T005	2.5
zma-miR164g-5p	miR164	DLPE	Predict	Zm00001d021821	NA	NA	NA	Zm00001d021821_T001	3
zma-miR164g-5p	miR164	DLPE	Predict	Zm00001d022384	NA	NA	NA	Zm00001d022384_T003	3
zma-miR164g-5p	miR164	DLPE	Predict	Zm00001d022491	NA	NA	NA	Zm00001d022491_T015	3
zma-miR164g-5p	miR164	DLPE	Predict	Zm00001d023416	NA	NA	NA	Zm00001d023416_T001	3
zma-miR164g-5p	miR164	DLPE	Predict	Zm00001d027387	NA	NA	NA	Zm00001d027387_T001	3
zma-miR164g-5p	miR164	DLPE	Predict	Zm00001d028759	NA	NA	NA	Zm00001d028759_T001	3
zma-miR164g-5p	miR164	DLPE	Predict	Zm00001d030561	NA	NA	NA	Zm00001d030561_T004	2.5
zma-miR164g-5p	miR164	DLPE	Predict	Zm00001d034701	NA	NA	NA	Zm00001d034701_T004	3
zma-miR164g-5p	miR164	DLPE	Both	Zm00001d035266	Zm00001d035266_T001	0	0.000561581	Zm00001d035266_T001	1
zma-miR164g-5p	miR164	DLPE	Predict	Zm00001d036968	NA	NA	NA	Zm00001d036968_T019	2.5
zma-miR164g-5p	miR164	DLPE	Predict	Zm00001d038726	NA	NA	NA	Zm00001d038726_T001	3
zma-miR164g-5p	miR164	DLPE	Predict	Zm00001d038852	NA	NA	NA	Zm00001d038852_T001	3
zma-miR164g-5p	miR164	DLPE	Predict	Zm00001d040019	NA	NA	NA	Zm00001d040019_T001	2.5
zma-miR164g-5p	miR164	DLPE	Predict	Zm00001d040285	NA	NA	NA	Zm00001d040285_T001	3
zma-miR164g-5p	miR164	DLPE	Predict	Zm00001d040411	NA	NA	NA	Zm00001d040411_T003	2.5
zma-miR164g-5p	miR164	DLPE	Predict	Zm00001d041472	NA	NA	NA	Zm00001d041472_T001	1
zma-miR164g-5p	miR164	DLPE	Predict	Zm00001d041791	NA	NA	NA	Zm00001d041791_T001	1
zma-miR164g-5p	miR164	DLPE	Predict	Zm00001d042438	NA	NA	NA	Zm00001d042438_T001	2.5
zma-miR164g-5p	miR164	DLPE	Predict	Zm00001d042670	NA	NA	NA	Zm00001d042670_T005	3
zma-miR164g-5p	miR164	DLPE	Predict	Zm00001d043152	NA	NA	NA	Zm00001d043152_T006	2.5
zma-miR164g-5p	miR164	DLPE	Predict	Zm00001d045456	NA	NA	NA	Zm00001d045456_T001	3
zma-miR164g-5p	miR164	DLPE	Predict	Zm00001d046372	NA	NA	NA	Zm00001d046372_T002	3
zma-miR164g-5p	miR164	DLPE	Predict	Zm00001d046683	NA	NA	NA	Zm00001d046683_T002	3
zma-miR164g-5p	miR164	DLPE	Predict	Zm00001d047973	NA	NA	NA	Zm00001d047973_T006	3
zma-miR164g-5p	miR164	DLPE	Predict	Zm00001d048495	NA	NA	NA	Zm00001d048495_T001	3
zma-miR164g-5p	miR164	DLPE	Predict	Zm00001d049171	NA	NA	NA	Zm00001d049171_T002	2.5
zma-miR164g-5p	miR164	DLPE	Predict	Zm00001d050043	NA	NA	NA	Zm00001d050043_T002	2.5
zma-miR164g-5p	miR164	DLPE	Predict	Zm00001d050893	NA	NA	NA	Zm00001d050893_T001	1.5
zma-miR164g-5p	miR164	DLPE	Predict	Zm00001d053727	NA	NA	NA	Zm00001d053727_T004	3
zma-miR164h-3p	miR164	AE	Predict	Zm00001d002965	NA	NA	NA	Zm00001d002965_T001	3
zma-miR164h-3p	miR164	AE	Predict	Zm00001d004851	NA	NA	NA	Zm00001d004851_T001	2.5
zma-miR164h-3p	miR164	AE	Predict	Zm00001d004861	NA	NA	NA	Zm00001d004861_T004	2.5
zma-miR164h-3p	miR164	AE	Predict	Zm00001d009205	NA	NA	NA	Zm00001d009205_T003	2.5
zma-miR164h-3p	miR164	AE	Predict	Zm00001d010975	NA	NA	NA	Zm00001d010975_T005	2.5
zma-miR164h-3p	miR164	AE	Predict	Zm00001d011847	NA	NA	NA	Zm00001d011847_T001	2.5
zma-miR164h-3p	miR164	AE	Predict	Zm00001d014074	NA	NA	NA	Zm00001d014074_T001	3
zma-miR164h-3p	miR164	AE	Predict	Zm00001d021785	NA	NA	NA	Zm00001d021785_T027	3
zma-miR164h-3p	miR164	AE	Predict	Zm00001d027738	NA	NA	NA	Zm00001d027738_T001	3
zma-miR164h-3p	miR164	AE	Predict	Zm00001d029366	NA	NA	NA	Zm00001d029366_T002	3
zma-miR164h-3p	miR164	AE	Predict	Zm00001d029850	NA	NA	NA	Zm00001d029850_T001	2.5
zma-miR164h-3p	miR164	AE	Predict	Zm00001d031711	NA	NA	NA	Zm00001d031711_T001	2.5
zma-miR164h-3p	miR164	AE	Predict	Zm00001d032768	NA	NA	NA	Zm00001d032768_T005	2
zma-miR164h-3p	miR164	AE	Predict	Zm00001d035492	NA	NA	NA	Zm00001d035492_T008	2.5
zma-miR164h-3p	miR164	AE	Predict	Zm00001d048421	NA	NA	NA	Zm00001d048421_T001	3
zma-miR164h-3p	miR164	AE	Predict	Zm00001d052442	NA	NA	NA	Zm00001d052442_T001	3
zma-miR164h-5p	miR164	NoDiff	Predict	Zm00001d002101	NA	NA	NA	Zm00001d002101_T001	3
zma-miR164h-5p	miR164	NoDiff	Predict	Zm00001d003414	NA	NA	NA	Zm00001d003414_T002	2
zma-miR164h-5p	miR164	NoDiff	Predict	Zm00001d006751	NA	NA	NA	Zm00001d006751_T007	3
zma-miR164h-5p	miR164	NoDiff	Predict	Zm00001d006825	NA	NA	NA	Zm00001d006825_T001	2.5
zma-miR164h-5p	miR164	NoDiff	Predict	Zm00001d007132	NA	NA	NA	Zm00001d007132_T001	3
zma-miR164h-5p	miR164	NoDiff	Predict	Zm00001d008528	NA	NA	NA	Zm00001d008528_T001	2.5
zma-miR164h-5p	miR164	NoDiff	Predict	Zm00001d012566	NA	NA	NA	Zm00001d012566_T001	2.5
zma-miR164h-5p	miR164	NoDiff	Predict	Zm00001d013818	NA	NA	NA	Zm00001d013818_T001	3
zma-miR164h-5p	miR164	NoDiff	Predict	Zm00001d014135	NA	NA	NA	Zm00001d014135_T001	2
zma-miR164h-5p	miR164	NoDiff	Predict	Zm00001d014405	NA	NA	NA	Zm00001d014405_T001	1
zma-miR164h-5p	miR164	NoDiff	Predict	Zm00001d016950	NA	NA	NA	Zm00001d016950_T001	1.5
zma-miR164h-5p	miR164	NoDiff	Predict	Zm00001d019044	NA	NA	NA	Zm00001d019044_T001	2
zma-miR164h-5p	miR164	NoDiff	Predict	Zm00001d019376	NA	NA	NA	Zm00001d019376_T010	3
zma-miR164h-5p	miR164	NoDiff	Predict	Zm00001d020685	NA	NA	NA	Zm00001d020685_T005	2.5
zma-miR164h-5p	miR164	NoDiff	Predict	Zm00001d021821	NA	NA	NA	Zm00001d021821_T001	3
zma-miR164h-5p	miR164	NoDiff	Predict	Zm00001d022384	NA	NA	NA	Zm00001d022384_T003	3
zma-miR164h-5p	miR164	NoDiff	Predict	Zm00001d022491	NA	NA	NA	Zm00001d022491_T015	3
zma-miR164h-5p	miR164	NoDiff	Predict	Zm00001d023416	NA	NA	NA	Zm00001d023416_T001	3
zma-miR164h-5p	miR164	NoDiff	Predict	Zm00001d024187	NA	NA	NA	Zm00001d024187_T001	3
zma-miR164h-5p	miR164	NoDiff	Predict	Zm00001d027387	NA	NA	NA	Zm00001d027387_T001	3
zma-miR164h-5p	miR164	NoDiff	Predict	Zm00001d028759	NA	NA	NA	Zm00001d028759_T001	3
zma-miR164h-5p	miR164	NoDiff	Predict	Zm00001d030561	NA	NA	NA	Zm00001d030561_T004	2.5
zma-miR164h-5p	miR164	NoDiff	Predict	Zm00001d034701	NA	NA	NA	Zm00001d034701_T004	3
zma-miR164h-5p	miR164	NoDiff	Predict	Zm00001d035266	NA	NA	NA	Zm00001d035266_T001	1
zma-miR164h-5p	miR164	NoDiff	Predict	Zm00001d036968	NA	NA	NA	Zm00001d036968_T019	2.5
zma-miR164h-5p	miR164	NoDiff	Predict	Zm00001d038726	NA	NA	NA	Zm00001d038726_T001	3
zma-miR164h-5p	miR164	NoDiff	Predict	Zm00001d038852	NA	NA	NA	Zm00001d038852_T001	3
zma-miR164h-5p	miR164	NoDiff	Predict	Zm00001d040019	NA	NA	NA	Zm00001d040019_T001	2.5
zma-miR164h-5p	miR164	NoDiff	Predict	Zm00001d040285	NA	NA	NA	Zm00001d040285_T001	3
zma-miR164h-5p	miR164	NoDiff	Predict	Zm00001d040411	NA	NA	NA	Zm00001d040411_T003	2.5
zma-miR164h-5p	miR164	NoDiff	Predict	Zm00001d041472	NA	NA	NA	Zm00001d041472_T001	1
zma-miR164h-5p	miR164	NoDiff	Both	Zm00001d041791	Zm00001d041791_T001	0	0.000561581	Zm00001d041791_T001	1
zma-miR164h-5p	miR164	NoDiff	Predict	Zm00001d042438	NA	NA	NA	Zm00001d042438_T001	2.5
zma-miR164h-5p	miR164	NoDiff	Predict	Zm00001d042670	NA	NA	NA	Zm00001d042670_T005	3
zma-miR164h-5p	miR164	NoDiff	Predict	Zm00001d043152	NA	NA	NA	Zm00001d043152_T006	2.5
zma-miR164h-5p	miR164	NoDiff	Predict	Zm00001d045456	NA	NA	NA	Zm00001d045456_T001	3
zma-miR164h-5p	miR164	NoDiff	Predict	Zm00001d046372	NA	NA	NA	Zm00001d046372_T002	3
zma-miR164h-5p	miR164	NoDiff	Predict	Zm00001d046683	NA	NA	NA	Zm00001d046683_T002	3
zma-miR164h-5p	miR164	NoDiff	Predict	Zm00001d047973	NA	NA	NA	Zm00001d047973_T006	3
zma-miR164h-5p	miR164	NoDiff	Predict	Zm00001d048495	NA	NA	NA	Zm00001d048495_T001	3
zma-miR164h-5p	miR164	NoDiff	Predict	Zm00001d049171	NA	NA	NA	Zm00001d049171_T002	2.5
zma-miR164h-5p	miR164	NoDiff	Predict	Zm00001d050043	NA	NA	NA	Zm00001d050043_T002	2.5
zma-miR164h-5p	miR164	NoDiff	Predict	Zm00001d050893	NA	NA	NA	Zm00001d050893_T001	1.5
zma-miR164h-5p	miR164	NoDiff	Predict	Zm00001d053727	NA	NA	NA	Zm00001d053727_T004	3
zma-miR166a-3p	miR166	NoDiff	Predict	Zm00001d008869	NA	NA	NA	Zm00001d008869_T001	1
zma-miR166a-3p	miR166	NoDiff	Both	Zm00001d013699	Zm00001d013699_T001	0	0.00560164	Zm00001d013699_T001	1
zma-miR166a-3p	miR166	NoDiff	Predict	Zm00001d014252	NA	NA	NA	Zm00001d014252_T002	1
zma-miR166a-3p	miR166	NoDiff	Predict	Zm00001d017590	NA	NA	NA	Zm00001d017590_T001	3
zma-miR166a-3p	miR166	NoDiff	Predict	Zm00001d018824	NA	NA	NA	Zm00001d018824_T001	1.5
zma-miR166a-3p	miR166	NoDiff	Predict	Zm00001d024060	NA	NA	NA	Zm00001d024060_T001	2
zma-miR166a-3p	miR166	NoDiff	Predict	Zm00001d025050	NA	NA	NA	Zm00001d025050_T002	3
zma-miR166a-3p	miR166	NoDiff	Predict	Zm00001d026307	NA	NA	NA	Zm00001d026307_T001	3
zma-miR166a-3p	miR166	NoDiff	Predict	Zm00001d026325	NA	NA	NA	Zm00001d026325_T001	1
zma-miR166a-3p	miR166	NoDiff	Predict	Zm00001d027317	NA	NA	NA	Zm00001d027317_T003	1
zma-miR166a-3p	miR166	NoDiff	Both	Zm00001d031061	Zm00001d031061_T009	0	0.000842253	Zm00001d031061_T001	1
zma-miR166a-3p	miR166	NoDiff	Predict	Zm00001d032681	NA	NA	NA	Zm00001d032681_T004	1
zma-miR166a-3p	miR166	NoDiff	Predict	Zm00001d033246	NA	NA	NA	Zm00001d033246_T004	1
zma-miR166a-3p	miR166	NoDiff	Degradome	Zm00001d037713	Zm00001d037713_T002	0	0.0263297	NA	NA
zma-miR166a-3p	miR166	NoDiff	Both	Zm00001d041489	Zm00001d041489_T001	0	0.00112285	Zm00001d041489_T005	1
zma-miR166a-3p	miR166	NoDiff	Predict	Zm00001d048527	NA	NA	NA	Zm00001d048527_T004	1
zma-miR166a-3p	miR166	NoDiff	Predict	Zm00001d051851	NA	NA	NA	Zm00001d051851_T002	1.5
zma-miR166a-5p	miR166	NoDiff	Predict	Zm00001d002194	NA	NA	NA	Zm00001d002194_T001	3
zma-miR166a-5p	miR166	NoDiff	Predict	Zm00001d004982	NA	NA	NA	Zm00001d004982_T002	2.5
zma-miR166a-5p	miR166	NoDiff	Predict	Zm00001d007602	NA	NA	NA	Zm00001d007602_T001	3
zma-miR166a-5p	miR166	NoDiff	Predict	Zm00001d008824	NA	NA	NA	Zm00001d008824_T001	3
zma-miR166a-5p	miR166	NoDiff	Predict	Zm00001d010813	NA	NA	NA	Zm00001d010813_T001	3
zma-miR166a-5p	miR166	NoDiff	Predict	Zm00001d010990	NA	NA	NA	Zm00001d010990_T001	2.5
zma-miR166a-5p	miR166	NoDiff	Predict	Zm00001d014191	NA	NA	NA	Zm00001d014191_T001	3
zma-miR166a-5p	miR166	NoDiff	Predict	Zm00001d017038	NA	NA	NA	Zm00001d017038_T003	2.5
zma-miR166a-5p	miR166	NoDiff	Predict	Zm00001d018201	NA	NA	NA	Zm00001d018201_T001	2.5
zma-miR166a-5p	miR166	NoDiff	Predict	Zm00001d019853	NA	NA	NA	Zm00001d019853_T001	2
zma-miR166a-5p	miR166	NoDiff	Predict	Zm00001d023755	NA	NA	NA	Zm00001d023755_T001	2.5
zma-miR166a-5p	miR166	NoDiff	Predict	Zm00001d025700	NA	NA	NA	Zm00001d025700_T001	3
zma-miR166a-5p	miR166	NoDiff	Predict	Zm00001d028269	NA	NA	NA	Zm00001d028269_T001	2.5
zma-miR166a-5p	miR166	NoDiff	Predict	Zm00001d029839	NA	NA	NA	Zm00001d029839_T006	3
zma-miR166a-5p	miR166	NoDiff	Predict	Zm00001d030046	NA	NA	NA	Zm00001d030046_T001	2.5
zma-miR166a-5p	miR166	NoDiff	Predict	Zm00001d030256	NA	NA	NA	Zm00001d030256_T007	2
zma-miR166a-5p	miR166	NoDiff	Predict	Zm00001d030374	NA	NA	NA	Zm00001d030374_T001	3
zma-miR166a-5p	miR166	NoDiff	Predict	Zm00001d032689	NA	NA	NA	Zm00001d032689_T011	3
zma-miR166a-5p	miR166	NoDiff	Predict	Zm00001d033650	NA	NA	NA	Zm00001d033650_T002	3
zma-miR166a-5p	miR166	NoDiff	Predict	Zm00001d035554	NA	NA	NA	Zm00001d035554_T001	3
zma-miR166a-5p	miR166	NoDiff	Predict	Zm00001d035645	NA	NA	NA	Zm00001d035645_T001	3
zma-miR166a-5p	miR166	NoDiff	Predict	Zm00001d037177	NA	NA	NA	Zm00001d037177_T001	2.5
zma-miR166a-5p	miR166	NoDiff	Predict	Zm00001d037641	NA	NA	NA	Zm00001d037641_T001	2
zma-miR166a-5p	miR166	NoDiff	Predict	Zm00001d038011	NA	NA	NA	Zm00001d038011_T001	2.5
zma-miR166a-5p	miR166	NoDiff	Predict	Zm00001d038916	NA	NA	NA	Zm00001d038916_T001	2.5
zma-miR166a-5p	miR166	NoDiff	Predict	Zm00001d040703	NA	NA	NA	Zm00001d040703_T001	2.5
zma-miR166a-5p	miR166	NoDiff	Predict	Zm00001d041695	NA	NA	NA	Zm00001d041695_T001	3
zma-miR166a-5p	miR166	NoDiff	Predict	Zm00001d041975	NA	NA	NA	Zm00001d041975_T001	2.5
zma-miR166a-5p	miR166	NoDiff	Predict	Zm00001d041976	NA	NA	NA	Zm00001d041976_T001	2.5
zma-miR166a-5p	miR166	NoDiff	Predict	Zm00001d042623	NA	NA	NA	Zm00001d042623_T001	3
zma-miR166a-5p	miR166	NoDiff	Predict	Zm00001d043467	NA	NA	NA	Zm00001d043467_T001	2.5
zma-miR166a-5p	miR166	NoDiff	Predict	Zm00001d045285	NA	NA	NA	Zm00001d045285_T001	3
zma-miR166a-5p	miR166	NoDiff	Predict	Zm00001d045760	NA	NA	NA	Zm00001d045760_T006	3
zma-miR166a-5p	miR166	NoDiff	Predict	Zm00001d045832	NA	NA	NA	Zm00001d045832_T001	2.5
zma-miR166a-5p	miR166	NoDiff	Predict	Zm00001d048000	NA	NA	NA	Zm00001d048000_T001	3
zma-miR166a-5p	miR166	NoDiff	Predict	Zm00001d048034	NA	NA	NA	Zm00001d048034_T003	3
zma-miR166a-5p	miR166	NoDiff	Predict	Zm00001d049599	NA	NA	NA	Zm00001d049599_T001	3
zma-miR166a-5p	miR166	NoDiff	Predict	Zm00001d050288	NA	NA	NA	Zm00001d050288_T001	3
zma-miR166a-5p	miR166	NoDiff	Predict	Zm00001d051832	NA	NA	NA	Zm00001d051832_T001	3
zma-miR166a-5p	miR166	NoDiff	Predict	Zm00001d052098	NA	NA	NA	Zm00001d052098_T001	3
zma-miR166b-3p.1_226759256	miR166	NoDiff	Predict	Zm00001d008869	NA	NA	NA	Zm00001d008869_T001	1
zma-miR166b-3p.1_226759256	miR166	NoDiff	Predict	Zm00001d013699	NA	NA	NA	Zm00001d013699_T001	1
zma-miR166b-3p.1_226759256	miR166	NoDiff	Predict	Zm00001d014252	NA	NA	NA	Zm00001d014252_T001	1
zma-miR166b-3p.1_226759256	miR166	NoDiff	Predict	Zm00001d017590	NA	NA	NA	Zm00001d017590_T001	3
zma-miR166b-3p.1_226759256	miR166	NoDiff	Predict	Zm00001d018824	NA	NA	NA	Zm00001d018824_T001	1.5
zma-miR166b-3p.1_226759256	miR166	NoDiff	Both	Zm00001d024060	Zm00001d024060_T001	0	0.0282422	Zm00001d024060_T001	2
zma-miR166b-3p.1_226759256	miR166	NoDiff	Predict	Zm00001d025050	NA	NA	NA	Zm00001d025050_T003	3
zma-miR166b-3p.1_226759256	miR166	NoDiff	Predict	Zm00001d026307	NA	NA	NA	Zm00001d026307_T001	3
zma-miR166b-3p.1_226759256	miR166	NoDiff	Predict	Zm00001d026325	NA	NA	NA	Zm00001d026325_T001	1
zma-miR166b-3p.1_226759256	miR166	NoDiff	Both	Zm00001d027317	Zm00001d027317_T019	0	0.00028083	Zm00001d027317_T032	1
zma-miR166b-3p.1_226759256	miR166	NoDiff	Both	Zm00001d031061	Zm00001d031061_T001	0	0.000561581	Zm00001d031061_T009	1
zma-miR166b-3p.1_226759256	miR166	NoDiff	Predict	Zm00001d032681	NA	NA	NA	Zm00001d032681_T003	1
zma-miR166b-3p.1_226759256	miR166	NoDiff	Predict	Zm00001d033246	NA	NA	NA	Zm00001d033246_T003	1
zma-miR166b-3p.1_226759256	miR166	NoDiff	Both	Zm00001d041489	Zm00001d041489_T008	0	0.00140336	Zm00001d041489_T008	1
zma-miR166b-3p.1_226759256	miR166	NoDiff	Both	Zm00001d048527	Zm00001d048527_T003	0	0.0016838	Zm00001d048527_T022	1
zma-miR166b-3p.1_226759256	miR166	NoDiff	Predict	Zm00001d051851	NA	NA	NA	Zm00001d051851_T001	1.5
zma-miR166b-5p.1_226759256	miR166	DHPE	Predict	Zm00001d003101	NA	NA	NA	Zm00001d003101_T013	3
zma-miR166b-5p.1_226759256	miR166	DHPE	Predict	Zm00001d003261	NA	NA	NA	Zm00001d003261_T019	3
zma-miR166b-5p.1_226759256	miR166	DHPE	Predict	Zm00001d012451	NA	NA	NA	Zm00001d012451_T006	3
zma-miR166b-5p.1_226759256	miR166	DHPE	Predict	Zm00001d014191	NA	NA	NA	Zm00001d014191_T001	2.5
zma-miR166b-5p.1_226759256	miR166	DHPE	Predict	Zm00001d019853	NA	NA	NA	Zm00001d019853_T001	3
zma-miR166b-5p.1_226759256	miR166	DHPE	Predict	Zm00001d024307	NA	NA	NA	Zm00001d024307_T008	2.5
zma-miR166b-5p.1_226759256	miR166	DHPE	Predict	Zm00001d028219	NA	NA	NA	Zm00001d028219_T001	2.5
zma-miR166b-5p.1_226759256	miR166	DHPE	Predict	Zm00001d029566	NA	NA	NA	Zm00001d029566_T003	3
zma-miR166b-5p.1_226759256	miR166	DHPE	Predict	Zm00001d029839	NA	NA	NA	Zm00001d029839_T003	2.5
zma-miR166b-5p.1_226759256	miR166	DHPE	Predict	Zm00001d030256	NA	NA	NA	Zm00001d030256_T001	3
zma-miR166b-5p.1_226759256	miR166	DHPE	Predict	Zm00001d032748	NA	NA	NA	Zm00001d032748_T003	3
zma-miR166b-5p.1_226759256	miR166	DHPE	Predict	Zm00001d034493	NA	NA	NA	Zm00001d034493_T001	2.5
zma-miR166b-5p.1_226759256	miR166	DHPE	Predict	Zm00001d035554	NA	NA	NA	Zm00001d035554_T001	2.5
zma-miR166b-5p.1_226759256	miR166	DHPE	Predict	Zm00001d037641	NA	NA	NA	Zm00001d037641_T001	3
zma-miR166b-5p.1_226759256	miR166	DHPE	Predict	Zm00001d037734	NA	NA	NA	Zm00001d037734_T005	2.5
zma-miR166b-5p.1_226759256	miR166	DHPE	Predict	Zm00001d040166	NA	NA	NA	Zm00001d040166_T006	3
zma-miR166b-5p.1_226759256	miR166	DHPE	Predict	Zm00001d042977	NA	NA	NA	Zm00001d042977_T001	3
zma-miR166b-5p.1_226759256	miR166	DHPE	Predict	Zm00001d044171	NA	NA	NA	Zm00001d044171_T001	3
zma-miR166b-5p.1_226759256	miR166	DHPE	Predict	Zm00001d049599	NA	NA	NA	Zm00001d049599_T001	2.5
zma-miR166b-5p.1_226759256	miR166	DHPE	Predict	Zm00001d049856	NA	NA	NA	Zm00001d049856_T002	2.5
zma-miR166b-3p.9_90025277	miR166	NoDiff	Predict	Zm00001d008869	NA	NA	NA	Zm00001d008869_T001	1
zma-miR166b-3p.9_90025277	miR166	NoDiff	Predict	Zm00001d013699	NA	NA	NA	Zm00001d013699_T001	1
zma-miR166b-3p.9_90025277	miR166	NoDiff	Predict	Zm00001d014252	NA	NA	NA	Zm00001d014252_T001	1
zma-miR166b-3p.9_90025277	miR166	NoDiff	Predict	Zm00001d017590	NA	NA	NA	Zm00001d017590_T001	3
zma-miR166b-3p.9_90025277	miR166	NoDiff	Predict	Zm00001d018824	NA	NA	NA	Zm00001d018824_T001	1.5
zma-miR166b-3p.9_90025277	miR166	NoDiff	Both	Zm00001d024060	Zm00001d024060_T001	0	0.0282422	Zm00001d024060_T001	2
zma-miR166b-3p.9_90025277	miR166	NoDiff	Predict	Zm00001d025050	NA	NA	NA	Zm00001d025050_T003	3
[truncated: 1,375 more rows]
