# Supplementary material for: Integrated Multi-Omics Reveals Significant Roles of Non-Additively Expressed Small RNAs in Heterosis for Maize Plant Height
Source: Int J Mol Sci. 2023 May 23;24(11):9150. doi: 10.3390/ijms24119150 (PMC10252383; doi:10.3390/ijms24119150)
Supplement: Supplementary file 1 [file ijms-24-09150-s001.zip › Table-S4.xlsx]

## Sheet: New
Table S4. Expression patterns of genes in hybrids.
GeneID	Hybrid2Female_Log2FC	Hybrid2Female_Qvalue	Hybrid2Male_Log2FC	Hybrid2Male_Qvalue	Female2Male_Log2FC	Female2Male_Qvalue	D/A_ratio	Expression_Pattern
ENSRNA049453693	2.27446	0.812423	0.701619	0.91949	-1.54442	0.853896	2.84711	NoDiff
ENSRNA049453717	0.611073	0.928239	1.08284	0.815268	0.494843	0.947807	4.36048	NoDiff
ENSRNA049454125	-0.015884	0.996954	0.867958	0.69762	0.905893	0.781817	0.871667	NoDiff
ENSRNA049456300	0.750888	0.857592	0.515692	0.846039	-0.21426	0.958143	8.10275	NoDiff
ENSRNA049456320	1.11899	0.70263	0.684233	0.805757	-0.414625	0.916563	6.12779	NoDiff
ENSRNA049456343	3.70163	0.592716	-1.63813	0.513561	-5.32534	0.116216	-0.355229	NoDiff
ENSRNA049456661	0.237607	0.973955	0.773694	0.880655	0.559743	0.939345	1.95013	NoDiff
ENSRNA049456719	0.0232444	0.998051	-3.10872	0.340501	-3.10658	0.329327	-1.00073	NoDiff
ENSRNA049456746	-1.01083	0.889232	-0.407452	0.927583	0.61497	0.892201	-1.86328	NoDiff
ENSRNA049456769	0.225263	0.954287	-1.50482	0.302508	-1.71027	0.267469	-0.869229	NoDiff
ENSRNA049456789	-0.653989	0.851285	-0.108685	0.976597	0.557462	0.831259	-1.29324	NoDiff
ENSRNA049457014	-1.86159	0.0160441	4.63449	0.0095852	6.50339	4.36804e-06	-0.474674	AE
ENSRNA049457359	0.234107	0.92813	-0.343957	0.820705	-0.562461	0.730782	-0.320976	NoDiff
ENSRNA049457503	-1.435	0.847946	-0.47118	0.943808	0.96908	0.838211	-1.56294	NoDiff
ENSRNA049457531	-0.361774	0.950553	0.407672	0.910584	0.801188	0.855492	-0.110314	NoDiff
ENSRNA049458208	-0.231475	0.853569	1.88502	0.000160935	2.1366	0.00051054	0.57336	DHPE
ENSRNA049458426	-0.042552	0.989761	0.806003	0.698137	0.873552	0.733702	0.792097	NoDiff
ENSRNA049458448	-0.11526	0.946594	0.218979	0.88573	0.355752	0.809371	0.169699	NoDiff
ENSRNA049458467	-0.243931	0.930431	0.742873	0.660447	1.01215	0.604876	0.319454	NoDiff
ENSRNA049458495	-0.577985	0.737664	0.401894	0.847284	0.99712	0.572673	-0.350705	NoDiff
ENSRNA049458582	-0.595604	0.847002	-0.146468	0.960621	0.4671	0.854584	-1.48	NoDiff
ENSRNA049458634	-0.223886	0.965725	2.13966	0.527094	2.38728	0.374273	0.603496	NoDiff
ENSRNA049458706	-0.573087	0.863344	-0.205765	0.935657	0.38412	0.875079	-1.8219	NoDiff
ENSRNA049458722	1.94304	0.596493	1.38375	0.380889	-0.539378	0.911186	11.6206	THPE
ENSRNA049458758	-0.155147	0.938588	0.509822	0.75636	0.681907	0.685204	0.377114	NoDiff
ENSRNA049458782	-0.735372	0.839357	1.37137	0.657804	2.13733	0.455118	-0.0616928	NoDiff
ENSRNA049458795	0.496666	0.927863	1.83939	0.480942	1.3666	0.738366	2.25322	NoDiff
ENSRNA049458812	-0.464524	0.821522	-0.163446	0.933762	0.327729	0.865052	-1.72317	NoDiff
ENSRNA049458826	0.982339	0.761147	-0.0481561	0.981219	-1.00665	0.68802	0.897367	NoDiff
ENSRNA049458846	-1.02775	0.873875	-1.20937	0.727521	-0.160977	0.971548	-11.0462	NoDiff
ENSRNA049458857	-1.85564	0.000357282	8.29391	1.81313e-09	10.1654	8.98011e-14	-0.457892	AE
ENSRNA049458874	-0.175804	0.938629	0.0178011	0.993397	0.215791	0.911718	-0.783334	NoDiff
ENSRNA049458957	0.0443328	0.985524	0.536412	0.638285	0.51624	0.738193	1.06348	NoDiff
ENSRNA049458986	0.633429	0.853748	1.24988	0.597942	0.639927	0.865479	3.83666	NoDiff
ENSRNA049459076	-0.0460895	0.983822	0.355456	0.758172	0.422462	0.769503	0.617331	NoDiff
ENSRNA049459101	-0.377343	0.886059	0.939786	0.454931	1.34668	0.375612	0.190309	NoDiff
ENSRNA049459132	0.0862536	0.967249	0.817225	0.560649	0.75592	0.644083	1.19536	NoDiff
ENSRNA049459156	0.0252374	0.992211	0.40445	0.736251	0.398623	0.822592	0.971631	NoDiff
ENSRNA049459180	1.06279	0.494883	0.907812	0.521379	-0.138986	0.954534	22.4247	NoDiff
ENSRNA049459199	-0.523166	0.921396	-0.0480644	0.992336	0.501584	0.862869	-1.11062	NoDiff
ENSRNA049459370	5.34277	0.110411	-1.68527	0.217878	-7.0117	0.000506029	-0.374676	AE
ENSRNA049459833	-0.303244	0.929349	0.415073	0.85532	0.741765	0.72091	0.00906966	NoDiff
ENSRNA049459870	-0.514646	0.936198	0.968637	0.823434	1.50702	0.654646	0.0431123	NoDiff
ENSRNA049459930	0.116425	0.986566	-1.65337	0.452577	-1.76078	0.573971	-0.94939	NoDiff
ENSRNA049460030	0.776546	0.908606	-1.63001	0.575519	-2.39241	0.523837	-0.677928	NoDiff
ENSRNA049460066	-0.819672	0.933584	0.334581	0.967328	1.16677	0.830055	-0.59608	NoDiff
ENSRNA049460114	-0.328581	0.967569	2.34488	0.689124	2.68903	0.663852	0.491971	NoDiff
ENSRNA049460134	-0.59758	0.964611	-2.84062	0.438248	-2.24314	0.663489	-1.1901	NoDiff
ENSRNA049460705	0.410412	0.952253	-0.401095	0.926514	-0.782659	0.860818	-0.129799	NoDiff
ENSRNA049460733	1.69719	0.749531	0.773531	0.814183	-0.892573	0.891374	4.23649	NoDiff
ENSRNA049460753	-0.806781	0.854285	0.0834708	0.989153	0.919934	0.842638	-0.839211	NoDiff
ENSRNA049461250	-0.512045	0.940375	1.10807	0.849809	1.65149	0.717314	0.0830085	NoDiff
ENSRNA049461441	2.51762	0.0788494	0.341996	0.83613	-2.15907	0.207385	1.69771	NoDiff
ENSRNA049461457	2.88388	0.774113	-1.36254	0.716146	-4.2404	0.50057	-0.221854	NoDiff
ENSRNA049461479	-0.0939431	0.987801	1.98265	0.620308	2.12373	0.685848	0.78449	NoDiff
ENSRNA049461505	7.24622	0.000371736	-0.0586347	0.978311	-7.29388	7.95997e-05	0.919606	DHPE
ENSRNA049461520	-0.867354	0.948	-2.67014	0.627615	-1.79773	0.78705	-1.42891	DLPE
ENSRNA049461556	-0.554848	0.645062	-0.193948	0.879483	0.379524	0.762201	-1.74856	NoDiff
ENSRNA049461578	-0.873132	0.529698	0.375982	0.83099	1.26752	0.275517	-0.572076	NoDiff
ENSRNA049461590	-0.191717	0.898425	-0.0281352	0.984185	0.183069	0.871432	-1.14885	NoDiff
ENSRNA049461612	3.40031	0.0259718	0.0176606	0.992465	-3.3626	0.0229992	1.03854	DHPE
ENSRNA049461634	0.236589	0.952474	0.621678	0.832429	0.39704	0.915488	2.28517	NoDiff
ENSRNA049461717	-1.40992	0.911315	-1.53398	0.863118	-0.107173	0.99035	-22.3967	NoDiff
ENSRNA049461732	4.33915	0.0216834	0.2453	0.893614	-4.08058	0.0225515	1.39695	DHPE
ENSRNA049461747	-0.608676	0.484021	-0.067113	0.947012	0.561592	0.441145	-1.16024	NoDiff
ENSRNA049461765	-0.84035	0.583834	-0.685313	0.623138	0.172349	0.920005	-6.29621	NoDiff
ENSRNA049461783	3.92513	0.533654	-0.379596	0.92936	-4.27854	0.496513	0.550133	NoDiff
ENSRNA049463024	0.483462	0.898634	1.33671	0.580661	0.877736	0.788377	2.59257	NoDiff
ENSRNA049463047	-0.593165	0.931528	-0.0609313	0.993387	0.550927	0.936559	-1.12435	NoDiff
ENSRNA049463067	-0.877483	0.837114	0.827928	0.797225	1.72199	0.637283	-0.330359	NoDiff
ENSRNA049463085	-1.04091	0.811008	0.344482	0.91948	1.40311	0.668606	-0.674587	NoDiff
ENSRNA049463396	0.400831	0.95147	0.558193	0.876751	0.184921	0.969463	5.59902	NoDiff
ENSRNA049463586	-0.252571	0.937135	0.482951	0.863474	0.766685	0.788211	0.146861	NoDiff
ENSRNA049463630	-0.199579	0.941207	0.840883	0.669404	1.06525	0.612946	0.445756	NoDiff
ENSRNA049463667	2.45478	0.818949	0.344202	0.975638	-2.10345	0.793517	1.52809	NoDiff
ENSRNA049463738	-0.274765	0.873871	-0.107988	0.947693	0.189969	0.905624	-1.82566	NoDiff
ENSRNA049463761	-0.427577	0.733949	0.268596	0.838748	0.720528	0.542079	-0.3552	NoDiff
ENSRNA049463774	-0.617266	0.79089	0.754407	0.655623	1.3937	0.37033	-0.151447	NoDiff
ENSRNA049463813	0.263959	0.954585	-0.649528	0.686509	-0.89199	0.70114	-0.566071	NoDiff
ENSRNA049463846	1.94168	0.255391	-0.792715	0.624534	-2.70953	0.000480498	0.0184235	AE
ENSRNA049464122	1.231	0.809217	1.08254	0.750133	-0.121651	0.983716	36.0034	NoDiff
ENSRNA049464139	0.762277	0.891713	1.34903	0.693165	0.607638	0.918064	4.82202	NoDiff
ENSRNA049464979	-0.466925	0.650505	0.200478	0.858784	0.684668	0.478138	-0.509877	NoDiff
ENSRNA049465132	4.29284	0.549182	-1.15025	0.654464	-5.43201	0.0691009	-0.0942761	NoDiff
ENSRNA049465220	2.09983	0.106222	-0.836941	0.200257	-2.9116	0.0033569	-0.00768834	AE
ENSRNA049465281	-0.519059	0.930431	-0.733102	0.829583	-0.195113	0.966205	-5.83193	NoDiff
ENSRNA049465355	-0.0119496	0.996761	0.0351262	0.988828	0.0769265	0.972703	0.0929942	NoDiff
ENSRNA049465372	-0.0677573	0.976847	-0.944928	0.308764	-0.859616	0.418146	-1.16075	NoDiff
ENSRNA049465399	0.117912	0.976682	-1.69357	0.146441	-1.79217	0.174127	-0.948507	NoDiff
ENSRNA049465410	1.70704	0.0559856	-0.709828	0.282882	-2.39338	0.000215301	0.0512919	AE
ENSRNA049465428	0.242739	0.928404	-1.23753	0.14336	-1.46083	0.164044	-0.813227	NoDiff
ENSRNA049465449	-0.308415	0.90367	-1.01551	0.339545	-0.685368	0.595017	-1.70653	NoDiff
ENSRNA049465483	2.92395	0.769919	0.979508	0.892962	-1.92544	0.8151	2.9894	NoDiff
ENSRNA049465606	1.02448	0.681127	0.38759	0.858475	-0.606504	0.787275	2.95659	NoDiff
ENSRNA049466083	0.575803	0.725566	-0.384097	0.79602	-0.934884	0.512003	0.0364539	NoDiff
ENSRNA049466300	0.0914566	0.979399	0.803312	0.699406	0.740516	0.759174	1.21374	NoDiff
ENSRNA049466442	-0.458554	0.948756	2.76004	0.594978	3.23997	0.532206	0.366067	NoDiff
ENSRNA049466569	-0.424901	0.814496	1.0977	0.458251	1.54198	0.261949	0.186593	NoDiff
ENSRNA049466579	-0.27219	0.921009	0.0779852	0.971248	0.3731	0.850378	-0.58145	NoDiff
ENSRNA049466617	-0.12512	0.944811	0.723955	0.430931	0.872188	0.420737	0.558108	NoDiff
ENSRNA049466632	1.68465	0.444949	-0.573434	0.822183	-2.23505	0.3353	0.177024	NoDiff
ENSRNA049466642	-0.184132	0.909852	0.107767	0.960621	0.312114	0.861592	-0.336026	NoDiff
ENSRNA049466657	2.68498	0.593164	1.15505	0.749931	-1.5115	0.841039	4.90792	NoDiff
ENSRNA049466664	-0.168994	0.981535	0.787486	0.859691	0.96958	0.8614	0.499082	NoDiff
ENSRNA049466676	0.101244	0.978367	1.81686	0.293716	1.74623	0.515858	1.14126	NoDiff
ENSRNA049467206	-1.70484	0.890551	-3.86299	0.517559	-2.12428	0.734483	-1.59534	NoDiff
ENSRNA049468366	-0.190655	0.979481	3.3697	0.629124	3.56608	0.551429	0.718762	NoDiff
ENSRNA049468892	0.173474	0.965782	0.410589	0.871684	0.245226	0.939506	2.27736	NoDiff
ENSRNA049468913	-0.0799923	0.973098	0.259906	0.850828	0.365272	0.775413	0.37816	NoDiff
ENSRNA049469775	1.95432	0.451919	1.953	6.29528e-05	0.0062835	0.998096	292.28	THPE
ENSRNA049470333	-1.81067	0.0647591	2.92663	0.196347	4.74059	0.0012565	-0.493514	AE
ENSRNA049470569	-1.05264	0.683669	-0.453318	0.856145	0.624893	0.791885	-1.92916	NoDiff
ENSRNA049470723	0.680283	0.948988	0.837066	0.881561	0.200039	0.980934	9.1251	NoDiff
ENSRNA049470793	1.24874	0.849161	-0.372048	0.908995	-1.60476	0.724636	0.330462	NoDiff
ENSRNA049470799	1.84645	0.722141	0.552389	0.852552	-1.27896	0.803664	2.59472	NoDiff
ENSRNA049470807	1.4311	0.89414	2.03505	0.751428	0.627546	0.945941	9.266	NoDiff
ENSRNA049470912	0.236841	0.986566	-0.0118343	0.998927	-0.225105	0.980522	0.966281	NoDiff
ENSRNA049470937	-2.14609	0.440613	3.88021	0.196465	6.04613	0.0243976	-0.57646	DLPE
ENSRNA049470983	-2.12455	0.842248	1.70642	0.847023	3.83434	0.580593	-0.54678	NoDiff
ENSRNA049471008	-0.956102	0.606138	1.36692	0.506956	2.33684	0.128258	-0.22938	NoDiff
ENSRNA049471617	0.583524	0.865974	-0.406061	0.838856	-0.967045	0.631363	0.0189409	NoDiff
ENSRNA049471654	-0.18539	0.936912	-0.694231	0.43942	-0.486288	0.720156	-1.7203	NoDiff
ENSRNA049471660	0.146407	0.965986	0.172945	0.93152	0.0563914	0.982548	4.22965	NoDiff
ENSRNA049471996	2.45865	0.31422	-1.25462	0.288035	-3.67523	0.00498631	-0.251556	AE
ENSRNA049472005	-3.10884	0.643721	-2.65807	0.632472	0.474837	0.928917	-5.2695	TLPE
ENSRNA049472011	-1.64788	0.617228	0.136674	0.966153	1.78648	0.525917	-0.919931	NoDiff
ENSRNA049472105	-0.331555	0.928606	0.706779	0.632658	1.07085	0.61558	0.153035	NoDiff
ENSRNA049472180	4.53495	0.483289	0.542103	0.886442	-3.9677	0.459531	1.95549	NoDiff
ENSRNA049472213	5.71871	0.0457991	-0.602221	0.705819	-6.30706	0.00475827	0.324544	AE
ENSRNA049472415	-0.0181083	0.995832	0.105884	0.967611	0.147506	0.945013	0.433874	NoDiff
ENSRNA049472421	-0.818018	0.706118	-0.262963	0.899908	0.578169	0.739558	-1.6231	NoDiff
ENSRNA049472461	0.48446	0.930924	2.00178	0.515426	1.54855	0.758705	2.12986	NoDiff
ENSRNA049472641	-2.91563	0.417056	-0.186726	0.98281	2.75815	0.386776	-1.04042	DLPE
ENSRNA049472786	0.217511	0.935202	2.02078	0.0768464	1.81878	0.24289	1.39418	NoDiff
ENSRNA049473286	0.49399	0.960555	1.72507	0.810102	1.2443	0.884973	2.26747	NoDiff
ENSRNA049473290	0.867751	0.792807	0.804274	0.770912	-0.0443871	0.991775	79.6948	NoDiff
ENSRNA049473651	-0.198887	0.981401	1.4443	0.821577	1.67918	0.803738	0.583595	NoDiff
ENSRNA049473738	3.45514	0.657224	-1.6684	0.50313	-5.1153	0.145173	-0.369212	NoDiff
ENSRNA049473923	1.87063	0.875277	-0.240321	0.982855	-2.10345	0.793517	0.685393	NoDiff
ENSRNA049474375	-0.774595	0.81822	0.424423	0.882488	1.21763	0.596177	-0.479173	NoDiff
ENSRNA049474454	1.31256	0.77448	-0.477493	0.864843	-1.77073	0.598277	0.206479	NoDiff
ENSRNA049474470	-0.516026	0.904114	0.6569	0.819452	1.1884	0.684071	-0.115366	NoDiff
ENSRNA049474492	-0.255926	0.973955	2.2148	0.578743	2.50705	0.72182	0.579784	NoDiff
ENSRNA049474524	-0.387197	0.928626	-0.216538	0.93866	0.188359	0.95321	-2.76865	NoDiff
ENSRNA049474580	-1.57571	0.341302	0.0918624	0.975638	1.68658	0.297302	-0.936185	NoDiff
ENSRNA049474585	-0.647246	0.785873	0.00358579	0.998911	0.666911	0.721624	-0.961216	NoDiff
ENSRNA049474713	1.71403	0.401861	0.432096	0.801776	-1.25403	0.494048	2.27235	NoDiff
ENSRNA049474917	-0.740423	0.929037	1.24952	0.824661	1.99171	0.707783	-0.0918291	NoDiff
ENSRNA049475115	0.964473	0.761659	-0.476821	0.847538	-1.41991	0.574297	0.111783	NoDiff
ENSRNA049475128	2.49048	0.814926	-0.805796	0.88573	-3.2796	0.653015	0.152366	NoDiff
ENSRNA049475138	0.834014	0.768777	0.968416	0.645294	0.159656	0.960911	13.7721	NoDiff
ENSRNA049475223	0.190082	0.930928	0.360572	0.821666	0.197686	0.906579	2.70898	NoDiff
ENSRNA049475237	0.613961	0.773409	0.409582	0.803303	-0.174316	0.941661	7.67277	NoDiff
ENSRNA049475307	0.744969	0.401653	0.428495	0.732893	-0.295543	0.852236	5.02362	NoDiff
ENSRNA049475518	-0.0379102	0.997184	-1.223	0.859085	-1.1663	0.883736	-1.06849	NoDiff
ENSRNA049475525	3.20924	0.525559	-0.576302	0.853341	-3.77008	0.306245	0.299705	NoDiff
ENSRNA049475551	2.93554	0.591933	0.867486	0.806808	-2.05458	0.748086	3.10293	THPE
ENSRNA049475560	-0.743058	0.956586	-3.63988	0.265539	-2.8452	0.46115	-1.15307	DLPE
ENSRNA049475622	2.40252	0.824082	-1.48303	0.790376	-3.86532	0.577025	-0.277679	NoDiff
ENSRNA049475996	-0.0940613	0.989101	0.0288795	0.99614	0.137103	0.980768	-0.596905	NoDiff
ENSRNA049476001	-2.68898	0.670757	-1.13419	0.900124	1.59032	0.774905	-1.51903	NoDiff
ENSRNA049476004	2.74672	0.645131	2.57524	0.560649	-0.156862	0.987266	66.008	THPE
ENSRNA049476008	0.0829717	0.987092	0.180965	0.966035	0.109374	0.979457	2.0216	NoDiff
ENSRNA049476010	-1.38719	0.770199	-0.33995	0.963639	1.06385	0.816409	-1.36008	NoDiff
ENSRNA049476127	4.42738	0.386852	1.08285	0.763672	-3.3195	0.647772	3.28851	NoDiff
ENSRNA049476166	3.44487	0.711353	0.442436	0.940894	-2.99232	0.688594	1.73464	NoDiff
ENSRNA049476173	3.14776	0.745197	0.0191087	0.997954	-3.1094	0.674089	1.04249	NoDiff
ENSRNA049476247	-0.59544	0.755606	1.64413	0.466271	2.26965	0.259063	0.114694	NoDiff
ENSRNA049476252	-0.262068	0.890743	0.521135	0.74286	0.8046	0.612738	0.161452	NoDiff
ENSRNA049476258	0.278491	0.957037	-0.330512	0.886056	-0.581767	0.8614	-0.213952	NoDiff
ENSRNA049476276	0.935585	0.942949	-1.66567	0.741871	-2.57456	0.698054	-0.647036	NoDiff
ENSRNA049476283	-0.943851	0.355447	0.740354	0.566214	1.70551	0.100664	-0.406627	NoDiff
ENSRNA049476322	-0.275964	0.901752	0.217591	0.92914	0.516279	0.820873	-0.224438	NoDiff
ENSRNA049476386	4.85421	0.0682828	-0.0710522	0.977456	-4.90638	0.0460953	0.915453	DHPE
ENSRNA049476610	-0.0144244	0.992152	0.46825	0.576749	0.501342	0.609277	0.808382	NoDiff
ENSRNA049476616	4.20873	0.427431	-1.11129	0.61189	-5.2994	0.0963238	-0.066494	NoDiff
ENSRNA049476674	0.991236	0.940104	-2.86336	0.580947	-3.83838	0.581073	-0.727697	NoDiff
ENSRNA049476781	3.31024	0.0977162	0.638544	0.76312	-2.65862	0.162519	2.3085	NoDiff
ENSRNA049476796	-0.247128	0.942272	-0.323261	0.891662	-0.0475559	0.986194	-17.3364	NoDiff
ENSRNA049476801	-0.420481	0.892986	0.0618496	0.980753	0.505619	0.832922	-0.755482	NoDiff
ENSRNA049476856	-0.794587	0.747547	1.31638	0.458471	2.13577	0.21605	-0.121663	NoDiff
ENSRNA049476908	-0.68593	0.456217	1.41817	0.0714106	2.12329	0.00223361	-0.0109138	AE
ENSRNA049477077	-3.12865	0.286028	1.51807	0.719527	4.6713	0.042376	-0.846131	DLPE
ENSRNA049477080	-2.06661	0.32601	-0.14214	0.947693	1.94831	0.287289	-1.05538	NoDiff
ENSRNA049477082	-0.728906	0.907412	4.45862	0.349029	5.21963	0.220525	0.182111	NoDiff
ENSRNA049477097	2.27311	0.707595	1.45235	0.710376	-0.792197	0.929144	9.60004	NoDiff
ENSRNA049477136	-1.8555	0.344717	4.2603	0.272695	6.14089	0.00743513	-0.459113	AE
ENSRNA049477351	0.136332	0.991782	1.70642	0.847023	1.58932	0.850885	1.16104	NoDiff
ENSRNA049477360	-1.09508	0.871511	2.01932	0.753148	3.13909	0.555863	-0.218211	NoDiff
ENSRNA049477424	1.87063	0.875277	-1.12755	0.873917	-2.99232	0.688594	-0.0826266	NoDiff
ENSRNA049477447	3.86986	0.547961	-0.281921	0.942533	-4.13199	0.414202	0.660446	NoDiff
ENSRNA049477485	-0.721848	0.462453	1.77732	0.00209626	2.52145	0.000109091	0.0188669	AE
ENSRNA049477491	-1.45629	0.75681	0.711105	0.880051	2.19467	0.526815	-0.63999	NoDiff
ENSRNA049477494	-0.185213	0.97538	-0.420418	0.883977	-0.209552	0.958263	-2.93359	NoDiff
ENSRNA049477656	-0.938631	0.938428	1.63089	0.855556	2.60976	0.734483	0.0178297	NoDiff
ENSRNA049477719	-3.23248	0.519236	0.818563	0.934297	4.06833	0.411021	-0.815013	NoDiff
ENSRNA049477741	-2.28194	0.149981	-0.0975102	0.960159	2.2034	0.0966426	-1.02985	NoDiff
ENSRNA049477769	-1.5835	0.353873	2.2144	0.473357	3.82012	0.0558026	-0.445681	NoDiff
ENSRNA049477934	-1.17452	0.92797	-0.706217	0.930234	0.489101	0.952427	-2.82278	NoDiff
ENSRNA049478017	0.100453	0.971904	1.02371	0.513774	0.942444	0.609723	1.21416	NoDiff
ENSRNA049478420	-2.51961	0.664886	-1.20691	0.845278	1.35133	0.759016	-1.70449	NoDiff
ENSRNA049478428	1.40113	0.65825	4.87778	0.0982173	3.48936	0.570108	4.19912	THPE
ENSRNA049478438	-1.14728	0.630416	-0.571755	0.823479	0.600023	0.777601	-2.19149	NoDiff
ENSRNA049478923	-2.46777	0.208722	1.48143	0.764339	3.95713	0.0456523	-0.755232	DLPE
ENSRNA049479127	0.630816	0.90367	1.88	0.452306	1.27075	0.764904	2.73764	NoDiff
ENSRNA049479136	-1.64192	0.545955	-0.896231	0.758695	0.767661	0.774907	-2.25573	NoDiff
ENSRNA049479153	-1.03791	0.827461	0.606832	0.884886	1.66975	0.694483	-0.512255	NoDiff
ENSRNA049479158	1.53809	0.59232	0.385554	0.884009	-1.13622	0.674301	2.17315	NoDiff
ENSRNA049479169	-0.329906	0.946594	0.675109	0.782018	1.03008	0.740608	0.153467	NoDiff
ENSRNA049479178	0.550431	0.844901	1.04738	0.645608	0.510978	0.875621	3.85143	NoDiff
ENSRNA049479185	2.78764	0.648747	1.09232	0.789903	-1.68572	0.807187	4.33351	NoDiff
ENSRNA049479211	0.16554	0.975067	0.467893	0.853082	0.323171	0.933353	1.9695	NoDiff
ENSRNA049479219	-0.119275	0.9667	1.45809	0.360782	1.60292	0.358642	0.712853	NoDiff
ENSRNA049479266	-0.876121	0.721762	3.44625	0.139577	4.33004	0.0398515	0.0215321	AE
ENSRNA049479365	0.388958	0.920417	0.459145	0.847023	0.0980198	0.976418	8.15934	NoDiff
ENSRNA049479370	0.0810577	0.964611	-0.178646	0.900899	-0.234877	0.856848	-0.537798	NoDiff
ENSRNA049479381	2.83489	0.527193	2.59453	0.403044	-0.225105	0.980522	76.3171	NoDiff
ENSRNA049479419	-1.1973	0.711651	-0.347588	0.917661	0.878939	0.770201	-1.47337	NoDiff
ENSRNA049479424	0.342286	0.958113	-0.676041	0.815884	-1.00616	0.767704	-0.49475	NoDiff
ENSRNA049479432	1.67201	0.30411	-0.350225	0.832975	-1.99749	0.106403	0.446288	NoDiff
ENSRNA049479449	0.811303	0.905007	0.392406	0.91658	-0.397735	0.92644	3.9003	NoDiff
ENSRNA049479456	-0.767242	0.613714	0.0986786	0.963308	0.891729	0.553776	-0.817397	NoDiff
ENSRNA049479461	0.312478	0.940462	0.644912	0.829182	0.355509	0.938376	2.90834	NoDiff
ENSRNA049479467	-0.678328	0.75387	0.953929	0.570045	1.65664	0.210951	-0.130212	NoDiff
ENSRNA049479518	-0.0729986	0.987727	-1.13305	0.568355	-1.03903	0.66038	-1.13291	NoDiff
ENSRNA049479579	-1.88115	0.0268241	8.14318	3.62726e-08	10.0409	1.56669e-11	-0.46768	AE
ENSRNA049479615	-3.64069	0.60596	NA	NA	3.51528	0.561381	-1	NoDiff
ENSRNA049479819	0.746499	0.936664	2.96218	0.705667	2.2424	0.775647	2.30567	NoDiff
ENSRNA049479912	-2.01545	0.749025	1.80744	0.83613	3.81688	0.478112	-0.51031	NoDiff
GRMZM5G804358	-0.972802	0.619335	0.963911	0.357792	1.95269	0.137095	-0.346228	NoDiff
GRMZM5G834128	-1.4249	0.236584	2.78145	0.123928	4.22882	0.00127188	-0.341197	AE
GRMZM5G834282	-0.595709	0.853284	0.66331	0.77876	1.27796	0.589524	-0.183836	NoDiff
GRMZM5G834666	-0.832918	0.619729	1.45655	0.262196	2.31324	0.0226955	-0.122508	AE
GRMZM5G836994	-3.10871	1.55031e-07	1.18088	0.360301	4.3079	1.63789e-09	-0.865702	DLPE
GRMZM5G845024	-1.10748	0.695241	0.246728	0.922963	1.37145	0.529803	-0.752966	NoDiff
GRMZM5G851769	-1.40421	0.0795374	1.43462	0.282965	2.85306	0.0016595	-0.45804	AE
GRMZM5G862955	-1.76019	0.00843965	-0.176098	0.874417	1.60848	0.000370631	-1.10039	DLPE
GRMZM5G876913	-0.400989	0.934976	1.00997	0.731107	1.43499	0.712319	0.193077	NoDiff
GRMZM5G881135	-1.2417	0.560975	-0.229373	0.924789	1.038	0.542353	-1.25707	NoDiff
GRMZM5G884538	-1.47485	0.161323	0.104618	0.960621	1.5948	0.108139	-0.919905	NoDiff
GRMZM5G884912	-1.89953	0.111455	-0.374242	0.801418	1.54335	0.197547	-1.22648	NoDiff
GRMZM5G889036	-0.803243	0.627875	0.893884	0.545377	1.72401	0.0998115	-0.249941	NoDiff
GRMZM5G889790	-0.144597	0.987947	2.74372	0.682268	2.88832	0.635333	0.758759	NoDiff
GRMZM5G890451	-1.63381	0.659981	0.561255	0.86303	2.21873	0.345172	-0.735006	NoDiff
GRMZM5G898647	-0.617175	0.888918	0.474595	0.909786	1.11829	0.815951	-0.323594	NoDiff
Zm00001d000001	-1.98445	3.03766e-06	0.797579	0.0584803	2.79682	1.20462e-09	-0.752013	DLPE
Zm00001d000002	-0.0843449	0.968039	0.563492	0.51262	0.656129	0.413078	0.602576	NoDiff
Zm00001d000004	-0.179872	0.867507	-0.563528	0.296979	-0.368621	0.490733	-1.96884	NoDiff
Zm00001d000005	0.2137	0.793321	0.201908	0.724229	-7.31799e-06	0.999979	22.2231	NoDiff
Zm00001d000011	-0.975749	0.0375873	5.65387	1.832e-40	6.6506	8.75687e-45	-0.0145092	AE
Zm00001d000019	0.231782	0.890551	-0.710599	0.278041	-0.930418	0.259016	-0.651949	NoDiff
Zm00001d000021	-0.573168	0.503758	-0.717033	0.127144	-0.133834	0.888881	-9.07768	NoDiff
Zm00001d000023	0.262331	0.740479	0.404615	0.455852	0.154811	0.744834	4.09664	NoDiff
Zm00001d000028	0.0861811	0.965782	0.270936	0.799803	0.205761	0.85977	1.57945	NoDiff
Zm00001d000029	0.13173	0.892322	-0.283246	0.551625	-0.399687	0.483382	-0.506724	NoDiff
Zm00001d000030	0.0438373	0.953504	-0.0514355	0.910432	-0.0803946	0.87039	-0.429709	NoDiff
Zm00001d000034	0.295972	0.74882	0.273894	0.680479	-0.0112796	0.987307	74.7492	NoDiff
Zm00001d000035	-0.248428	0.749959	-0.560568	0.305189	-0.294231	0.690523	-2.66517	NoDiff
Zm00001d000036	-0.872833	0.31277	0.250306	0.833414	1.14546	0.239348	-0.681722	NoDiff
Zm00001d000037	-2.51002	0.0294874	0.44741	0.893922	2.9864	0.0623866	-0.892219	NoDiff
Zm00001d000038	0.0337134	0.981635	-0.462531	0.214397	-0.484719	0.493875	-0.967347	NoDiff
Zm00001d000039	0.178199	0.857629	0.0679984	0.904915	-0.0936871	0.908611	3.21406	NoDiff
Zm00001d000040	1.31531	0.00772269	-1.11383	0.000239153	-2.41409	7.80656e-11	-0.323447	AE
Zm00001d000041	0.25681	0.752815	-0.257698	0.61966	-0.494602	0.25226	-0.119439	NoDiff
Zm00001d000042	0.857492	0.0416629	-0.37516	0.372532	-1.21661	0.00121461	0.200298	AE
Zm00001d000045	-0.151733	0.899231	0.183967	0.82178	0.355307	0.608729	-0.0190076	NoDiff
Zm00001d000046	-0.332051	0.607018	-0.206915	0.664831	0.144484	0.826997	-3.12922	NoDiff
Zm00001d000052	1.07072	0.00105289	0.355419	0.368278	-0.697936	0.029945	2.52538	NoDiff
Zm00001d000053	0.274555	0.678444	0.11756	0.843601	-0.143019	0.762201	3.1459	NoDiff
Zm00001d000055	1.5397	0.125352	-0.908419	0.0986204	-2.42665	0.00053429	-0.142375	AE
Zm00001d000062	0.520466	0.704379	0.597395	0.508085	0.0944367	0.937183	11.655	NoDiff
Zm00001d000065	0.243497	0.883068	0.677865	0.326838	0.457653	0.650778	2.13426	NoDiff
Zm00001d000066	2.62146	0.000795038	0.217446	0.825127	-2.38433	0.00658952	1.41879	DHPE
Zm00001d000067	6.63636	0.00157214	-0.76574	0.536823	-7.384	6.27673e-05	0.184489	AE
Zm00001d000071	0.362542	0.780449	2.0554	0.0303549	1.70767	0.14135	1.75043	NoDiff
Zm00001d000072	0.648683	0.0373532	0.190913	0.74695	-0.442142	0.370717	2.15125	NoDiff
Zm00001d000074	0.168373	0.907191	0.274291	0.752063	0.123383	0.913166	3.17214	NoDiff
Zm00001d000076	0.122673	0.946795	0.271668	0.803471	0.158532	0.883661	2.1813	NoDiff
Zm00001d000077	-0.0921962	0.92864	0.680462	0.129635	0.788771	0.0619181	0.62444	NoDiff
Zm00001d000080	1.82307	0.000107125	-1.80117	0.00177929	-3.61048	5.1525e-10	-0.552383	DLPE
Zm00001d000085	0.813372	0.0613822	-0.396878	0.383952	-1.19292	0.0010473	0.153363	AE
Zm00001d000098	-0.722523	0.248502	-0.140312	0.803658	0.595098	0.328279	-1.3325	NoDiff
Zm00001d000099	-0.34731	0.608381	0.0371365	0.956683	0.396522	0.385788	-0.822427	NoDiff
Zm00001d000102	-0.147833	0.880885	-0.48581	0.228293	-0.324513	0.575406	-1.96074	NoDiff
Zm00001d000110	0.0352826	0.965727	0.415537	0.242953	0.396372	0.287608	1.03355	NoDiff
Zm00001d000112	-7.24658	NA	-3.40095	0.00107474	3.85683	NA	-1.13192	NoDiff
Zm00001d000113	-1.95274	0.000290116	-1.40518	0.128113	0.56821	0.63039	-3.45753	TLPE
Zm00001d000116	-0.238135	0.611594	-0.586264	0.104268	-0.33396	0.450059	-2.37767	NoDiff
Zm00001d000117	-1.87808	0.0039281	1.11773	0.219177	3.01598	1.7277e-07	-0.668817	DLPE
Zm00001d000118	-0.544398	0.706118	2.93169	0.0367902	3.48791	0.0125627	0.278737	AE
Zm00001d000120	-0.541341	0.294633	-0.376149	0.481712	0.181853	0.762854	-4.01542	NoDiff
Zm00001d000121	-1.41014	0.0221667	7.36293	2.2157e-09	8.79088	6.04798e-13	-0.265461	AE
Zm00001d000122	-0.324284	0.660464	1.40517	0.000106153	1.74422	3.67932e-08	0.382239	AE
Zm00001d000123	0.446474	0.394332	-0.0426253	0.940001	-0.474603	0.275454	0.821244	NoDiff
Zm00001d000124	-0.353477	0.391268	-0.369863	0.227992	-0.000528673	0.999447	-35.0572	NoDiff
Zm00001d000126	-0.288218	0.880685	-0.877098	0.306706	-0.565588	0.573479	-1.85913	NoDiff
Zm00001d000133	-1.33757	0.0770859	-1.21356	0.26826	0.133836	0.938666	-11.1478	NoDiff
Zm00001d000135	0.413852	0.333628	0.0109696	0.985456	-0.388069	0.322066	1.11904	NoDiff
Zm00001d000137	-0.52158	0.532542	-0.175263	0.796972	0.366724	0.636143	-1.71079	NoDiff
Zm00001d000141	0.268218	0.819215	1.18318	6.64965e-05	0.935897	0.127441	1.73481	NoDiff
Zm00001d000143	-0.184041	0.867507	0.550429	0.250688	0.744922	0.0926346	0.34072	NoDiff
Zm00001d000147	0.293177	0.828106	0.221039	0.80151	-0.0504779	0.96899	17.7068	NoDiff
Zm00001d000150	0.452327	0.625589	0.176244	0.806211	-0.260266	0.755363	2.78256	NoDiff
Zm00001d000152	-0.0468431	0.968607	-0.0668354	0.925135	-0.00143477	0.99899	-7.48749	NoDiff
Zm00001d000153	0.802541	0.119074	-0.0275327	0.973365	-0.81849	0.0729834	0.926638	NoDiff
Zm00001d000154	-0.487748	0.940462	-0.593184	0.863078	-0.0872596	0.982393	-13.7765	NoDiff
Zm00001d000158	0.898937	0.163802	1.99742	0.00329123	1.11319	0.193619	4.05155	NoDiff
Zm00001d000162	-0.306792	0.857629	0.789089	0.294803	1.1163	0.253681	0.236022	NoDiff
Zm00001d000164	1.86095	0.0750965	2.5557	1.04074e-05	0.71734	0.669717	13.8108	NoDiff
Zm00001d000165	1.35169	0.0107845	0.77744	0.360499	-0.55844	0.63307	5.64904	THPE
Zm00001d000166	-0.163617	0.792632	-0.0241803	0.975004	0.155741	0.789096	-1.18051	NoDiff
Zm00001d000168	-0.0527243	0.944383	0.637383	0.12764	0.705583	0.0593498	0.724014	NoDiff
Zm00001d000169	0.553783	0.136439	0.676021	0.00697692	0.139536	0.786327	9.36067	NoDiff
Zm00001d000170	0.526755	0.435843	0.119456	0.874989	-0.388766	0.617835	1.81836	NoDiff
Zm00001d000175	-0.302731	0.868983	0.56482	0.540565	0.889541	0.429618	0.115953	NoDiff
Zm00001d000178	0.122336	0.919469	-0.338206	0.578008	-0.450684	0.483488	-0.598314	NoDiff
Zm00001d000179	-1.69019	0.128654	-2.41544	1.26323e-06	-0.714519	0.536327	-3.24108	TLPE
Zm00001d000183	-1.24609	0.0417816	4.54822	3.52046e-14	5.81896	7.21337e-17	-0.196314	AE
Zm00001d000184	-0.362983	0.601018	-0.403427	0.333971	-0.0279034	0.971548	-78.0421	NoDiff
Zm00001d000191	0.139131	0.900322	-0.0663771	0.942116	-0.194288	0.771149	0.248177	NoDiff
Zm00001d000195	-6.36313	0.0640438	-2.8954	0.294283	3.48941	0.0888765	-1.16737	NoDiff
Zm00001d000197	0.62088	0.238729	0.219537	0.775038	-0.385446	0.585492	2.52331	NoDiff
Zm00001d000199	0.122977	0.870527	0.541182	0.17059	0.435119	0.327949	1.50356	NoDiff
Zm00001d000202	0.347941	0.67488	-0.0185017	0.980647	-0.355999	0.527164	0.906172	NoDiff
Zm00001d000203	-1.60102	0.630965	0.737642	0.790983	2.36315	0.158009	-0.667921	NoDiff
Zm00001d000204	-1.16584	0.00546651	-0.968068	0.000115196	0.211587	0.729415	-6.5986	TLPE
Zm00001d000205	-0.624541	0.254879	0.330793	0.503592	0.972857	0.0262613	-0.466572	NoDiff
Zm00001d000208	6.3276	0.00642865	0.353942	0.860279	-5.96247	0.0250539	1.55828	DHPE
Zm00001d000213	0.420304	0.513885	0.546559	0.312775	0.13925	0.845911	7.04572	NoDiff
Zm00001d000220	-0.348574	0.625221	-1.17799	0.000552273	-0.81293	0.04222	-1.62538	NoDiff
Zm00001d000222	0.274045	0.755454	-1.78458	1.39576e-07	-2.03898	4.00278e-06	-0.879559	DLPE
Zm00001d000223	0.195407	0.880685	-0.274256	0.720187	-0.448293	0.504864	-0.290387	NoDiff
Zm00001d000224	1.03304	0.107079	0.466187	0.467917	-0.545333	0.527513	3.56229	NoDiff
Zm00001d000226	-0.112573	0.90813	1.38249	0.00471613	1.5087	0.0010004	0.716239	DHPE
Zm00001d000227	-0.10621	0.908429	-0.212503	0.621007	-0.089961	0.87653	-4.51803	NoDiff
Zm00001d000228	5.76014	1.97118e-06	-0.186474	0.82394	-5.93463	1.554e-07	0.763413	DHPE
Zm00001d000230	0.485286	0.648643	-0.0678744	0.937481	-0.534663	0.558409	0.736735	NoDiff
Zm00001d000236	-0.0893269	0.948988	-0.490526	0.38216	-0.385161	0.608272	-1.55081	NoDiff
Zm00001d000237	-1.88027	0.0108655	-1.48544	0.0478631	0.417118	0.690773	-4.6159	TLPE
Zm00001d000238	0.3391	0.815633	-0.747091	0.384828	-1.06749	0.145019	-0.542973	NoDiff
Zm00001d000240	-0.0582175	0.934976	0.0171038	0.976597	0.0906308	0.845882	-0.557878	NoDiff
Zm00001d000241	0.216775	0.80871	0.294486	0.565044	0.090624	0.898776	4.87352	NoDiff
Zm00001d000242	0.34892	0.868182	-0.291584	0.761342	-0.617508	0.665083	-0.0572399	NoDiff
Zm00001d000247	0.579721	0.266124	0.837565	0.131269	0.275305	0.751078	6.04646	NoDiff
Zm00001d000250	6.09275	0.0248357	-1.04199	0.443949	-7.11817	9.96063e-05	-0.0207438	AE
Zm00001d000255	-0.734066	0.512693	0.582905	0.614278	1.33296	0.150942	-0.350907	NoDiff
Zm00001d000257	0.0480787	0.949736	0.341967	0.335642	0.311512	0.386465	1.13608	NoDiff
Zm00001d000259	1.78029	0.782016	-0.537433	0.905503	-2.28961	0.591815	0.236	NoDiff
Zm00001d000288	0.795471	0.154795	0.0845055	0.915085	-0.6994	0.0737061	1.3403	NoDiff
Zm00001d000291	-0.195532	0.911315	0.409093	0.588648	0.62704	0.493396	0.201907	NoDiff
Zm00001d000293	1.97037	0.000168785	-0.252986	0.658664	-2.20246	1.69918e-06	0.603648	DHPE
Zm00001d000294	0.172767	0.933294	0.599591	0.787118	0.451322	0.686767	1.78363	NoDiff
Zm00001d000295	-0.262071	0.763972	-0.553827	0.159294	-0.28041	0.630739	-2.81273	NoDiff
Zm00001d000299	0.65915	0.101902	0.519846	0.234388	-0.122302	0.866942	13.8302	NoDiff
Zm00001d000300	0.0231233	0.984901	-0.151834	0.823434	-0.161217	0.827941	-1.06458	NoDiff
Zm00001d000301	-0.0910269	0.915139	-0.295704	0.617011	-0.187635	0.788721	-2.28958	NoDiff
Zm00001d000302	-0.247421	0.682783	0.16596	0.710163	0.429141	0.275454	-0.289031	NoDiff
Zm00001d000305	-0.245324	0.686555	-0.476241	0.187577	-0.212676	0.591551	-3.39852	NoDiff
Zm00001d000306	8.31537	9.7896e-08	-0.400516	0.636563	-8.69849	5.38501e-09	0.525536	DHPE
Zm00001d000307	-0.311977	0.786167	0.875151	0.149021	1.20422	0.0733552	0.259098	NoDiff
Zm00001d000308	1.48453	0.435471	1.27823	0.233714	-0.176923	0.945013	29.1547	NoDiff
Zm00001d000310	-0.880452	0.649234	-0.162965	0.896682	0.734483	0.621849	-1.27882	NoDiff
Zm00001d000311	-0.637957	0.0749032	0.315473	0.446385	0.968905	0.00106863	-0.488741	NoDiff
Zm00001d000312	0.577013	0.398338	-0.49063	0.39071	-1.05611	0.00459841	-0.117811	AE
Zm00001d000313	-0.112566	0.906719	-0.0801375	0.906323	0.0525813	0.936678	-2.82194	NoDiff
Zm00001d000314	-0.100108	0.896665	0.0120369	0.98605	0.127274	0.815636	-0.748102	NoDiff
Zm00001d000316	0.475941	0.456948	-3.41988	NA	-3.88145	NA	-0.945686	NoDiff
Zm00001d000320	0.456054	0.737312	0.804924	0.467493	0.36428	0.821946	3.96092	NoDiff
Zm00001d000328	0.596172	0.321833	-0.0441685	0.961564	-0.626378	0.0910624	0.836835	NoDiff
Zm00001d000329	-0.190895	0.863046	0.898251	0.092388	1.10784	0.0404465	0.476262	AE
Zm00001d000339	-1.12222	0.48053	-1.02997	0.301455	0.112837	0.945094	-11.3796	NoDiff
Zm00001d000345	0.00594396	0.995955	-0.316089	0.510256	-0.304587	0.525899	-1.12806	NoDiff
Zm00001d000346	0.958609	0.0518252	0.211791	0.80564	-0.735473	0.170554	1.82259	NoDiff
Zm00001d000349	0.0607372	0.961769	0.464234	0.416015	0.421013	0.521874	1.18142	NoDiff
Zm00001d000350	0.131523	0.944383	0.000902193	0.999224	-0.124122	0.912081	1.02522	NoDiff
Zm00001d000357	-2.54771	0.00270196	-0.0544132	0.949834	2.50257	0.00242165	-1.01296	DLPE
Zm00001d000358	-0.120662	0.948164	-0.419415	0.695815	-0.275414	0.815951	-2.01765	NoDiff
Zm00001d000360	0.00925242	0.996486	1.11878	0.32682	1.12901	0.391067	0.95139	NoDiff
Zm00001d000361	-0.578864	0.297541	-0.194966	0.753673	0.400575	0.527939	-1.72167	NoDiff
Zm00001d000364	7.77678	1.01015e-11	-0.941746	0.126587	-8.69921	1.55089e-19	0.050595	AE
Zm00001d000370	1.54485	2.19685e-05	0.328581	0.58358	-1.20037	0.00302779	1.92898	DHPE
Zm00001d000379	0.212051	0.705873	-0.189569	0.707461	-0.385678	0.358733	-0.0483963	NoDiff
Zm00001d000380	0.612731	0.753185	0.675942	0.450067	0.0874413	0.96178	14.7073	NoDiff
Zm00001d000381	0.232625	0.791342	0.0349497	0.954601	-0.181298	0.788211	1.59336	NoDiff
Zm00001d000382	-0.310379	0.813056	0.419269	0.652546	0.742637	0.241121	-0.0251464	NoDiff
Zm00001d000390	-0.738093	0.658533	0.758324	0.561976	1.52508	0.154213	-0.257565	NoDiff
Zm00001d000391	-0.818051	0.195549	-0.227905	0.718188	0.606283	0.350148	-1.51929	NoDiff
Zm00001d000396	-0.202061	0.765484	-0.136316	0.766176	0.0808714	0.893191	-3.3716	NoDiff
Zm00001d000399	-0.0791627	0.958636	-1.08653	0.03067	-0.998202	0.0993635	-1.14252	NoDiff
Zm00001d000400	-0.292987	0.89879	-0.929468	0.3165	-0.622806	0.610088	-1.76031	NoDiff
Zm00001d000401	-0.51782	0.593491	-0.305868	0.511499	0.234024	0.791877	-2.92479	NoDiff
Zm00001d000402	0.305432	0.839903	0.539411	0.585699	0.25834	0.786224	3.42386	NoDiff
Zm00001d000403	-0.871338	0.0390773	-0.0717622	0.903937	0.81224	0.0321496	-1.11273	NoDiff
Zm00001d000407	0.969132	0.00790735	0.454313	0.288422	-0.50204	0.205739	3.63993	NoDiff
Zm00001d000408	0.361752	0.510318	0.76864	0.0421021	0.425767	0.391262	2.96549	NoDiff
Zm00001d000418	2.19032	0.174764	0.368491	0.823979	-1.81813	0.154335	1.82075	NoDiff
Zm00001d000419	0.403933	0.819759	-0.187812	0.876761	-0.58659	0.556474	0.244317	NoDiff
Zm00001d000424	-1.57022	0.00640193	-0.698294	0.167685	0.886086	0.135431	-1.86934	NoDiff
Zm00001d000428	-0.007992	0.994519	0.661042	0.184761	0.681473	0.121334	0.874576	NoDiff
Zm00001d000429	2.10989	0.742553	-1.73042	0.38769	-3.79122	0.168369	-0.499049	NoDiff
Zm00001d000430	-0.203311	0.834864	0.118165	0.898634	0.337624	0.627732	-0.339852	NoDiff
Zm00001d000432	-0.383173	0.371529	0.286895	0.499957	0.686853	0.0529203	-0.283361	NoDiff
Zm00001d000434	-0.353811	0.84299	0.55931	0.702982	0.925108	0.44865	0.0348684	NoDiff
Zm00001d000435	0.0733259	0.940462	0.553873	0.208466	0.497347	0.339246	1.20449	NoDiff
Zm00001d000436	0.0802334	0.91723	0.223666	0.564596	0.160949	0.727575	1.62563	NoDiff
Zm00001d000437	10.5358	2.88928e-14	-0.0368067	0.977185	-10.5575	2.4111e-14	0.956876	DHPE
Zm00001d000439	1.46787	0.00529679	1.05018	0.0920002	-0.395846	0.610917	10.5212	NoDiff
Zm00001d000443	-0.00995579	0.989849	0.113022	0.803658	0.137244	0.770677	0.510665	NoDiff
Zm00001d000447	-0.617615	0.609328	-1.10422	0.0475072	-0.465877	0.599569	-2.99101	NoDiff
Zm00001d000455	4.84437	0.395268	-0.456161	0.880655	-5.28997	0.0936319	0.46517	NoDiff
Zm00001d000458	0.315365	0.900468	-0.192859	0.901766	-0.48679	0.795761	0.137198	NoDiff
Zm00001d000483	0.143394	0.959787	-0.69131	0.627456	-0.82619	0.581073	-0.778016	NoDiff
Zm00001d000500	-0.662818	0.628921	7.83689	1.0912e-06	8.52518	1.62449e-08	0.236942	AE
Zm00001d000506	0.491259	0.819759	0.539519	0.545282	0.0745703	0.967744	12.7279	NoDiff
Zm00001d000508	-3.45214	1.44683e-07	-2.99391	6.82238e-06	0.479527	0.650721	-5.20075	TLPE
Zm00001d000522	-0.869169	0.015047	0.382028	0.625637	1.27001	0.0231443	-0.567758	DLPE
Zm00001d000523	-0.686245	0.534389	-0.297528	0.823979	0.410102	0.745609	-2.0377	NoDiff
Zm00001d000526	-0.438284	0.370982	-0.220152	0.849092	0.235642	0.831912	-2.38688	NoDiff
Zm00001d000534	-2.20702	0.833324	-4.54033	0.0307507	-2.35486	0.411162	-1.38964	NoDiff
Zm00001d000545	6.0647	0.019938	-0.726538	0.610129	-6.77519	0.000604098	0.217082	AE
Zm00001d000559	4.96735	0.187716	0.242602	0.930234	-4.70985	0.229942	1.3777	NoDiff
Zm00001d000561	-1.13791	0.0303137	10.5731	2.24346e-15	11.7305	4.93681e-19	-0.109966	AE
Zm00001d000566	-0.803491	0.351923	0.665104	0.524384	1.48979	0.0703642	-0.350835	NoDiff
Zm00001d000568	-0.140143	0.966615	1.18959	0.499049	1.34402	0.470366	0.645347	NoDiff
Zm00001d000596	8.07899	4.97079e-07	1.70784	0.0394561	-6.35257	0.00547684	5.57915	THPE
Zm00001d000618	-0.0468232	0.994519	-2.14176	0.246929	-2.06428	0.434802	-1.0334	NoDiff
Zm00001d000619	3.11657	0.000513663	-0.0761615	0.959837	-3.18328	0.00034276	0.885822	DHPE
Zm00001d000633	4.63625	0.458709	0.155029	0.972428	-4.45865	0.317343	1.25455	NoDiff
Zm00001d000640	-0.375809	0.969326	0.96261	0.880674	1.36691	0.794569	0.216971	NoDiff
Zm00001d000659	0.0919695	0.95992	-1.34684	0.00387046	-1.42224	0.00872695	-0.945022	DLPE
Zm00001d000671	3.01219	0.10639	-0.67842	0.529964	-3.65867	0.0124255	0.196262	AE
Zm00001d000675	-2.79038	0.0408763	-1.43337	0.432403	1.37724	0.317234	-1.77169	NoDiff
Zm00001d000681	5.26041	0.141032	-1.39999	0.339577	-6.64327	0.0012565	-0.237077	AE
Zm00001d000682	7.23232	4.45216e-06	-0.985418	0.135092	-8.2024	2.2339e-08	0.0122316	AE
Zm00001d000697	1.61923	0.76717	3.45661	0.290893	1.86819	0.817047	6.18362	THPE
Zm00001d000706	7.81507	2.56024e-06	-1.19969	0.0367902	-8.99769	4.48638e-10	-0.123559	AE
Zm00001d000707	0.196988	0.842092	0.817731	0.142323	0.638116	0.263348	1.66812	NoDiff
Zm00001d000709	-0.372184	0.822838	1.0035	0.325714	1.39794	0.174997	0.22182	NoDiff
Zm00001d000725	-0.69023	0.843735	1.78402	0.559577	2.49053	0.306438	0.0491529	NoDiff
Zm00001d000726	-1.52596	0.662235	0.0297365	0.996749	1.55873	0.61379	-0.984713	NoDiff
Zm00001d000727	-4.43963	0.348846	NA	NA	4.31056	0.316404	-1	DLPE
Zm00001d000728	0.301438	0.978367	-7.44718	NA	-7.74077	NA	-0.997929	NoDiff
Zm00001d000731	-0.390852	0.968607	3.20755	0.677362	3.63552	0.607263	0.495798	NoDiff
Zm00001d000740	0.509402	0.863344	1.78284	0.333582	1.2889	0.615263	2.32376	NoDiff
Zm00001d000750	-0.0279369	0.986566	0.352275	0.688326	0.395719	0.692819	0.693792	NoDiff
Zm00001d000758	2.98249	0.60984	-0.343769	0.929163	-3.30005	0.138033	0.565338	NoDiff
Zm00001d000763	0.601027	0.727772	1.08651	0.273362	0.509393	0.758377	4.13673	NoDiff
Zm00001d000764	-0.0397268	0.989917	1.01982	0.501101	1.0893	0.484209	0.821045	NoDiff
Zm00001d000779	-0.786795	0.865009	3.5334	0.490272	4.33137	0.318631	0.137723	NoDiff
Zm00001d000784	4.32477	0.39292	-1.44421	0.435508	-5.75367	0.0351131	-0.261142	AE
Zm00001d000791	-0.201108	0.938588	1.38064	0.339545	1.60611	0.258877	0.564109	NoDiff
Zm00001d000804	-1.19059	0.643477	3.21754	0.248847	4.41754	0.0262027	-0.19523	AE
Zm00001d000805	2.61918	0.539284	0.135602	0.97644	-2.46211	0.59742	1.2809	NoDiff
Zm00001d000809	-0.361347	0.850989	0.609089	0.61602	0.990937	0.411506	0.0577819	NoDiff
Zm00001d000826	0.146791	0.956089	-0.367338	0.755994	-0.499816	0.743378	-0.552396	NoDiff
Zm00001d000833	-0.741474	0.603072	4.49168	0.013486	5.24641	0.00218621	0.151203	AE
Zm00001d000840	0.602856	0.906579	-0.307495	0.889636	-0.886116	0.773741	0.166413	NoDiff
Zm00001d000842	-1.01991	0.00961014	8.34463	1.27221e-09	9.38134	1.95739e-12	-0.0337245	AE
Zm00001d000849	-4.03024	0.0338206	-2.78192	0.258833	1.28479	0.372779	-2.16885	TLPE
Zm00001d000853	6.26948	0.00116884	0.0913741	0.962508	-6.15495	0.000929415	1.15648	DHPE
Zm00001d000854	3.35087	0.166361	-0.217155	0.919538	-3.54379	0.102106	0.712364	NoDiff
Zm00001d000906	5.19678	0.182563	0.293043	0.925178	-4.89103	0.179987	1.46297	NoDiff
Zm00001d000923	-1.19064	0.689925	0.63623	0.8323	1.84211	0.436133	-0.568744	NoDiff
Zm00001d000942	-1.19974	0.471025	-0.132501	0.963161	1.08491	0.568359	-1.14895	NoDiff
Zm00001d000967	-1.49217	0.35594	-1.23995	0.455776	0.277446	0.882062	-5.9811	NoDiff
Zm00001d000978	8.60384	2.63198e-09	-1.01215	0.0273981	-9.597	4.73907e-13	-0.00146113	AE
Zm00001d000986	-0.910075	0.473941	1.02611	0.44624	1.95233	0.0655015	-0.283663	NoDiff
Zm00001d000992	0.238327	0.885078	0.0356368	0.97595	-0.185807	0.86805	1.53243	NoDiff
Zm00001d001004	-0.721846	0.598255	0.210593	0.910978	0.942669	0.457656	-0.669344	NoDiff
Zm00001d001006	-0.672253	0.617543	0.172527	0.894057	0.867152	0.37379	-0.677267	NoDiff
Zm00001d001012	-0.697058	0.569606	0.145776	0.935877	0.867473	0.471486	-0.720827	NoDiff
Zm00001d001022	-0.318502	0.78838	1.21518	0.0181579	1.55515	0.0171266	0.352912	AE
Zm00001d001023	-2.94766	0.000241735	0.0677444	0.96461	3.02797	2.31342e-05	-0.984624	DLPE
Zm00001d001035	4.56261	0.328946	-1.69211	0.30314	-6.2395	0.00819397	-0.377996	AE
Zm00001d001043	0.497055	0.890626	1.11882	0.673491	0.629606	0.854584	3.1484	NoDiff
Zm00001d001070	-3.77749	0.287686	-1.10154	0.878336	2.67472	0.505654	-1.19381	NoDiff
Zm00001d001080	-0.314683	0.727772	-0.141484	0.837713	0.192422	0.758662	-2.0728	NoDiff
Zm00001d001082	-0.691741	0.667084	-0.714019	0.559055	0.00286076	0.998984	-56.3462	NoDiff
Zm00001d001083	0.561426	0.743905	0.0650466	0.961108	-0.470111	0.723625	1.41731	NoDiff
Zm00001d001087	-0.44038	0.685236	0.050965	0.967889	0.509633	0.615846	-0.813175	NoDiff
Zm00001d001110	-0.4834	0.623144	8.31782	9.06127e-09	8.81856	1.62436e-09	0.401602	AE
Zm00001d001140	-0.154762	0.936664	0.456472	0.628765	0.636786	0.361294	0.350308	NoDiff
Zm00001d001162	4.94399	0.23531	1.13073	0.725506	-3.79542	0.586194	3.42435	NoDiff
Zm00001d001166	3.0114	2.62851e-05	0.0720807	0.934759	-2.92333	1.66485e-05	1.12885	DHPE
Zm00001d001168	-1.31372	0.0384689	7.41666	2.75562e-06	8.74887	1.47249e-09	-0.211003	AE
Zm00001d001183	-1.02636	0.293205	7.20034	1.83959e-05	8.23846	6.08553e-08	-0.037104	AE
Zm00001d001206	-1.16816	0.337612	1.48285	0.19443	2.67385	0.00970372	-0.337937	AE
Zm00001d001230	0.135065	0.974166	0.13268	0.922277	0.0153534	0.995679	7.04287	NoDiff
Zm00001d001240	10.4162	3.64376e-14	0.120479	0.896568	-10.2803	5.55412e-14	1.18316	DHPE
Zm00001d001243	-1.22985	0.420192	5.85099	0.00875879	7.10785	0.000116234	-0.165387	AE
Zm00001d001250	1.0555	0.0327095	-0.0817604	0.886062	-1.11862	0.0156445	0.814384	DHPE
Zm00001d001256	0.237076	0.886667	0.887323	0.324799	0.66222	0.512114	1.83638	NoDiff
Zm00001d001267	-0.209454	0.862559	-0.0588943	0.965412	0.171001	0.883434	-1.45927	NoDiff
Zm00001d001276	-0.604578	0.89769	1.87525	0.451031	2.50963	0.428134	0.149054	NoDiff
Zm00001d001304	0.0604519	0.980044	0.578291	0.632658	0.543555	0.702998	1.12426	NoDiff
Zm00001d001307	-0.160659	0.932085	0.498264	0.759806	0.683169	0.669181	0.363786	NoDiff
Zm00001d001371	5.00452	0.351728	0.392886	0.908431	-4.59351	0.255185	1.65394	NoDiff
Zm00001d001377	-0.48922	0.927287	0.433671	0.882884	0.939761	0.771183	-0.242883	NoDiff
Zm00001d001382	3.21661	0.133594	0.114286	0.965483	-3.09801	0.186805	1.18805	NoDiff
Zm00001d001384	0.991236	0.940104	-3.81569	0.217205	-4.78904	0.209746	-0.873233	NoDiff
Zm00001d001399	-0.377428	0.727987	1.5483	0.0027873	1.94596	0.00121461	0.343059	AE
Zm00001d001402	-1.04929	0.303536	5.97685	0.000519995	7.03998	9.62143e-06	-0.0584674	AE
Zm00001d001424	-4.98282	0.000102574	2.96218	0.705667	8.0018	1.07961e-06	-0.938971	DLPE
Zm00001d001436	-1.72819	0.482956	1.09774	0.7762	2.85398	0.22404	-0.634594	NoDiff
Zm00001d001453	-0.155249	0.968607	-0.436612	0.847391	-0.271949	0.923283	-2.23111	NoDiff
Zm00001d001456	-0.165183	0.921009	1.07557	0.239018	1.26477	0.219006	0.567673	NoDiff
Zm00001d001472	-1.18118	0.060544	2.02943	0.0138308	3.23617	1.34016e-05	-0.269533	AE
Zm00001d001475	0.563266	0.764345	0.265531	0.845898	-0.287647	0.862381	3.42227	NoDiff
Zm00001d001479	5.14412	0.000921528	-0.682231	0.577773	-5.80505	0.000117846	0.243451	AE
Zm00001d001480	6.93972	0.00041003	0.233298	0.874449	-6.69311	0.00107274	1.35842	DHPE
Zm00001d001489	0.397957	0.763391	0.661488	0.518074	0.273406	0.806023	4.19257	NoDiff
Zm00001d001490	-0.67454	0.169741	1.18155	0.000148858	1.87599	1.64466e-07	-0.0568851	AE
Zm00001d001491	-3.54946	0.697951	-5.65076	0.0390954	-2.10496	0.557561	-1.6231	NoDiff
Zm00001d001492	-0.315375	0.911976	1.60464	0.149652	1.93927	0.204335	0.429202	NoDiff
Zm00001d001497	-0.136944	0.955713	1.73017	0.0237557	1.88641	0.0960342	0.69855	NoDiff
Zm00001d001520	0.0967056	0.95153	0.33867	0.7762	0.260154	0.849568	1.55424	NoDiff
Zm00001d001529	-0.683226	0.615694	6.85648	9.61718e-05	7.55958	5.56327e-06	0.220755	AE
Zm00001d001540	-0.977109	0.777145	-0.114685	0.977871	0.882903	0.793102	-1.15633	NoDiff
Zm00001d001548	-0.082098	0.976845	0.0826563	0.977454	0.177593	0.949304	-0.145062	NoDiff
Zm00001d001549	0.617532	0.901473	0.321292	0.904315	-0.276931	0.944775	4.03549	NoDiff
Zm00001d001554	-0.204684	0.969153	2.30128	0.236847	2.51146	0.3967	0.643784	NoDiff
Zm00001d001555	2.66428	0.166613	2.43962	0.11198	-0.216589	0.954225	67.2839	NoDiff
Zm00001d001556	2.95697	0.0749572	1.83656	0.295596	-1.11541	0.709759	10.537	NoDiff
Zm00001d001566	-0.124378	0.944383	1.34479	0.0789398	1.48374	0.0383008	0.686598	DHPE
Zm00001d001568	0.0118445	0.996954	-0.0407991	0.986364	-0.0279173	0.991468	-4.22429	NoDiff
Zm00001d001572	-0.710657	0.765781	0.976666	0.657321	1.70936	0.360821	-0.150024	NoDiff
Zm00001d001580	3.72473	0.589527	-1.0199	0.70866	-4.72444	0.220228	-0.00662628	NoDiff
Zm00001d001588	-1.32093	0.265021	1.62061	0.0775109	2.96185	0.000702527	-0.39241	AE
Zm00001d001600	-0.907427	0.874131	-0.117313	0.978311	0.803022	0.845659	-1.17938	NoDiff
Zm00001d001602	4.20286	0.442894	-1.36045	0.513581	-5.55307	0.0551985	-0.219411	NoDiff
Zm00001d001609	-0.657222	0.89299	4.58506	0.301455	5.25718	0.102011	0.247629	NoDiff
Zm00001d001641	-1.20001	0.38047	6.20422	0.00144332	7.42286	4.29269e-05	-0.146875	AE
Zm00001d001642	-1.69753	0.400694	4.9362	0.102993	6.65807	0.00256488	-0.397428	AE
Zm00001d001644	-0.559695	0.586108	-0.250842	0.797225	0.325953	0.730366	-2.14001	NoDiff
Zm00001d001666	-5.94553	0.0417091	-4.34267	0.250227	1.62122	0.459531	-1.94766	NoDiff
Zm00001d001672	-1.98961	0.147122	4.23778	0.111845	6.25533	0.000562643	-0.524663	DLPE
Zm00001d001673	0.816089	0.660855	0.0121753	0.995344	-0.79092	0.593647	1.05392	NoDiff
Zm00001d001677	0.249593	0.919997	1.07635	0.232333	0.851415	0.550166	1.72042	NoDiff
Zm00001d001691	1.38259	0.418786	1.96531	0.161214	0.58674	0.82796	10.2287	NoDiff
Zm00001d001700	-0.0492189	0.970611	0.188156	0.797225	0.256926	0.747763	0.395628	NoDiff
Zm00001d001711	7.07844	0.000301083	-0.93282	0.412676	-7.99355	2.28631e-06	0.0553639	AE
Zm00001d001725	-2.10356	0.182674	-2.12363	0.101478	-0.000478734	0.999788	-143.932	TLPE
Zm00001d001747	1.18944	0.0341253	-0.182178	0.798024	-1.35333	0.0183698	0.626252	DHPE
Zm00001d001754	-0.393379	0.872479	-0.622958	0.495208	-0.206188	0.909997	-4.69026	NoDiff
Zm00001d001760	-0.946989	0.60302	5.56504	0.0194537	6.52727	0.00148259	0.0177192	AE
Zm00001d001763	-1.15672	0.305639	-0.108005	0.933468	1.06693	0.254778	-1.11666	NoDiff
Zm00001d001765	-0.337759	0.692793	-0.676193	0.241764	-0.326012	0.707252	-2.87095	NoDiff
Zm00001d001766	-1.39416	0.0493955	-0.361787	0.660102	1.0516	0.0340888	-1.38604	DLPE
Zm00001d001767	0.474195	0.635868	0.434713	0.462993	-0.0170046	0.988485	374.407	NoDiff
Zm00001d001770	-0.465151	0.604659	1.92966	0.00126257	2.41407	0.000100098	0.28629	AE
Zm00001d001771	0.336953	0.730534	-0.481513	0.399291	-0.796738	0.111114	-0.33135	NoDiff
Zm00001d001772	-1.58497	0.117493	-1.19631	0.114865	0.399556	0.781032	-4.32097	NoDiff
Zm00001d001773	-0.0910148	0.948465	-0.138514	0.821089	-0.0274995	0.978663	-29.0391	NoDiff
Zm00001d001774	-3.50838	0.0146587	-0.243699	0.917416	3.285	0.00476726	-1.03193	DLPE
Zm00001d001776	0.25716	0.96549	0.724168	0.812259	0.480679	0.923844	2.20424	NoDiff
Zm00001d001779	-0.853021	0.741052	-0.336691	0.915919	0.533972	0.847732	-1.85136	NoDiff
Zm00001d001780	0.0808627	0.91483	0.0314383	0.957124	-0.034295	0.951892	6.20821	NoDiff
Zm00001d001781	-1.32771	0.00279941	0.691056	0.35166	2.03625	3.25573e-05	-0.602686	DLPE
Zm00001d001784	-0.398909	0.827904	0.237164	0.887536	0.65555	0.567732	-0.362043	NoDiff
Zm00001d001785	0.246664	0.795962	-0.349684	0.600713	-0.586037	0.296674	-0.313207	NoDiff
Zm00001d001786	0.43793	0.403135	0.351632	0.457705	-0.0733652	0.891168	16.2006	NoDiff
Zm00001d001787	0.0176261	0.985198	0.0590288	0.922445	0.0597068	0.908692	0.765115	NoDiff
Zm00001d001788	-0.077067	0.962528	-0.0492105	0.95854	0.0394984	0.966714	-2.60985	NoDiff
Zm00001d001789	0.14859	0.874615	-0.326461	0.52914	-0.457225	0.144069	-0.493526	NoDiff
Zm00001d001790	0.139489	0.874131	-0.0184854	0.978311	-0.144295	0.80913	0.787354	NoDiff
Zm00001d001791	1.07438	0.0723052	0.0312285	0.978011	-1.02766	0.0364915	1.11509	DHPE
Zm00001d001792	4.01425	0.1862	-1.70875	0.158023	-5.67425	0.000442319	-0.413059	AE
Zm00001d001797	0.48632	0.369912	0.012115	0.986863	-0.457421	0.394914	1.10478	NoDiff
Zm00001d001798	0.807691	0.0402128	-0.513188	0.223697	-1.30698	9.79189e-06	-0.00601245	AE
Zm00001d001799	0.176778	0.781838	0.822116	0.187554	0.662668	0.337851	1.57707	NoDiff
Zm00001d001800	-0.195518	0.809217	-0.120603	0.844577	0.0945514	0.87173	-2.75745	NoDiff
Zm00001d001802	0.146133	0.937036	-0.884377	0.08241	-1.02198	0.180577	-0.821689	NoDiff
Zm00001d001803	0.232394	0.77152	-0.0294691	0.965062	-0.247988	0.659923	0.773282	NoDiff
Zm00001d001804	-0.258442	0.863561	-1.05786	0.00511929	-0.783406	0.323304	-1.51269	NoDiff
Zm00001d001806	-0.234965	0.857401	-0.730828	0.0610121	-0.474624	0.530057	-1.90377	NoDiff
Zm00001d001807	-0.555422	0.467207	-0.786595	0.114299	-0.210451	0.744213	-5.6905	NoDiff
Zm00001d001808	-0.0231429	0.981076	-0.0435417	0.946211	-0.00635214	0.992736	-6.7625	NoDiff
Zm00001d001809	0.704459	0.109172	-0.153745	0.812862	-0.843492	0.0345292	0.551654	NoDiff
Zm00001d001811	-0.743217	0.368275	-0.108809	0.900329	0.648791	0.425403	-1.2295	NoDiff
Zm00001d001812	0.184947	0.90902	-0.29079	0.817929	-0.458013	0.677176	-0.338555	NoDiff
Zm00001d001813	0.00859467	0.993849	0.550409	0.31102	0.560194	0.411782	0.916141	NoDiff
Zm00001d001814	-0.262285	0.587716	-0.414982	0.22117	-0.135948	0.76458	-5.28046	NoDiff
Zm00001d001819	0.236358	0.795798	0.481012	0.373813	0.260867	0.720156	2.75557	NoDiff
Zm00001d001820	1.37353	0.0643535	1.43751	0.013186	0.0748144	0.957891	49.5673	NoDiff
Zm00001d001824	1.61011	0.000928343	2.54514	2.65051e-07	0.956129	0.156955	9.11922	THPE
Zm00001d001825	0.147748	0.882897	0.631516	0.0959359	0.499095	0.36607	1.57251	NoDiff
Zm00001d001827	0.271366	0.662765	0.166783	0.724269	-0.0872246	0.892002	6.55047	NoDiff
Zm00001d001828	0.483362	0.329634	0.573112	0.144569	0.103773	0.816513	10.0401	NoDiff
Zm00001d001829	2.88942	0.527187	-2.45381	0.0686318	-5.33681	0.00386044	-0.675217	DLPE
Zm00001d001830	-0.166469	0.822436	-0.0634094	0.911259	0.119049	0.841926	-1.7593	NoDiff
Zm00001d001831	-1.274	0.0242316	-1.29245	0.00498762	-0.00656111	0.995635	-146.421	TLPE
Zm00001d001834	-0.277916	0.560011	0.922769	7.87979e-05	1.21861	3.71154e-06	0.336069	AE
Zm00001d001837	0.222053	0.653969	-0.391082	0.329244	-0.596891	0.0974894	-0.411209	NoDiff
Zm00001d001838	0.796021	0.226413	0.900993	0.0361879	0.125593	0.889388	15.5929	NoDiff
Zm00001d001839	-0.14873	0.939874	0.102113	0.941963	0.269041	0.841039	-0.241165	NoDiff
Zm00001d001841	-0.435478	0.4337	0.20187	0.715999	0.654261	0.0988612	-0.465819	NoDiff
Zm00001d001842	-0.295342	0.874131	-0.276693	0.849336	0.0408296	0.981514	-8.87339	NoDiff
Zm00001d001843	-0.0273039	0.989725	0.811087	0.358061	0.855381	0.416017	0.847777	NoDiff
Zm00001d001844	0.317049	0.556201	0.317001	0.469873	0.0163527	0.977983	18.9696	NoDiff
Zm00001d001845	-0.324042	0.741106	-0.328279	0.578008	0.013047	0.989209	-18.7386	NoDiff
Zm00001d001846	-0.0212168	0.986292	0.0758099	0.917855	0.10825	0.857143	0.222946	NoDiff
Zm00001d001847	-0.147253	0.864781	0.210224	0.572756	0.375404	0.441517	0.038941	NoDiff
Zm00001d001848	0.357976	0.767251	0.11992	0.911988	-0.228	0.774942	2.27867	NoDiff
Zm00001d001849	0.668046	0.841334	0.22224	0.909147	-0.429214	0.857721	2.45605	NoDiff
Zm00001d001855	0.225805	0.831617	0.0775779	0.902664	-0.127425	0.883203	2.72289	NoDiff
Zm00001d001856	-0.210227	0.727987	-0.957083	0.0139865	-0.728594	0.0792721	-1.47832	NoDiff
Zm00001d001857	-0.788188	0.597758	0.79464	0.34172	1.59944	0.087338	-0.271541	NoDiff
Zm00001d001858	0.443316	0.741964	-0.839282	0.169991	-1.26333	0.10773	-0.512069	NoDiff
Zm00001d001859	0.137876	0.907197	-0.0304079	0.975004	-0.157761	0.800911	0.588556	NoDiff
Zm00001d001860	-0.673431	0.42134	0.195944	0.862097	0.883776	0.287795	-0.654406	NoDiff
Zm00001d001861	-0.535082	0.229125	0.806284	0.104225	1.35802	0.00174568	-0.0519549	AE
Zm00001d001862	-2.71822	0.0693141	-1.05372	0.4069	1.68276	0.200531	-1.45367	NoDiff
Zm00001d001864	0.0280816	0.971943	0.284176	0.581911	0.272039	0.613961	0.999335	NoDiff
Zm00001d001865	-1.20706	0.194503	0.270376	0.805664	1.49744	0.0221541	-0.76591	DLPE
Zm00001d001866	0.315256	0.660464	0.846923	0.0219974	0.549493	0.306886	2.35423	NoDiff
Zm00001d001868	0.217337	0.777145	-0.222654	0.662357	-0.421525	0.300677	-0.12309	NoDiff
Zm00001d001869	-0.174093	0.857452	-0.263038	0.499957	-0.0700321	0.928115	-8.43689	NoDiff
Zm00001d001870	-0.0739296	0.935506	-0.444423	0.288616	-0.356678	0.399085	-1.51632	NoDiff
Zm00001d001871	-0.888276	0.091053	-0.195379	0.713409	0.704991	0.195721	-1.37488	NoDiff
Zm00001d001877	-0.230581	0.658437	0.369365	0.35883	0.614358	0.0690374	0.0811819	NoDiff
Zm00001d001879	0.29359	0.749531	-0.0868097	0.911096	-0.370114	0.454137	0.472476	NoDiff
Zm00001d001880	-0.0434249	0.981535	0.0508967	0.961315	0.117821	0.911463	-0.0706698	NoDiff
Zm00001d001881	-0.273706	0.55492	-0.350431	0.312908	-0.0616813	0.912493	-13.5917	NoDiff
Zm00001d001882	-0.264627	0.710789	0.560235	0.212477	0.843282	0.0570825	0.184807	NoDiff
Zm00001d001883	-1.51712	0.000918074	-0.761438	0.0908879	0.778433	0.116903	-2.09672	TLPE
Zm00001d001884	0.352292	0.458858	0.146557	0.748869	-0.18951	0.695548	3.00197	NoDiff
Zm00001d001887	4.26823	0.0389611	-0.982984	0.285891	-5.23827	0.000317005	-0.0086738	AE
Zm00001d001894	0.151909	0.950553	-0.0460254	0.971673	-0.174865	0.909997	0.593769	NoDiff
Zm00001d001895	0.789008	0.00279941	-0.466625	0.0923518	-1.2391	1.69999e-07	0.046798	AE
Zm00001d001896	-0.0358054	0.983038	-0.348482	0.612507	-0.287434	0.74695	-1.45482	NoDiff
Zm00001d001897	0.260049	0.809025	0.173546	0.724624	-0.0677409	0.944504	9.1122	NoDiff
Zm00001d001898	-0.164638	0.831617	0.18226	0.700269	0.3604	0.437246	-0.0732015	NoDiff
Zm00001d001899	-0.696305	0.0713495	-0.459949	0.182507	0.25141	0.62567	-3.60699	NoDiff
Zm00001d001900	0.637203	0.226651	-0.0946505	0.855556	-0.715047	0.113859	0.699575	NoDiff
Zm00001d001901	0.0221767	0.981076	-0.353761	0.31877	-0.360777	0.416882	-1.02194	NoDiff
Zm00001d001902	-0.711278	0.54791	2.07848	0.0377548	2.81402	0.00543794	0.0658544	AE
Zm00001d001903	-0.088585	0.91228	0.456966	0.177959	0.563604	0.129453	0.53163	NoDiff
Zm00001d001905	-0.331898	0.810122	0.735256	0.394517	1.09162	0.137095	0.176179	NoDiff
Zm00001d001907	-0.780466	0.750609	-2.9114	0.000137333	-2.11333	0.0156659	-1.26077	DLPE
Zm00001d001908	0.913299	0.0573937	-1.06171	0.000414095	-1.95718	8.09359e-09	-0.400404	AE
Zm00001d001909	-0.487879	0.301709	0.164844	0.822183	0.67066	0.194889	-0.579995	NoDiff
Zm00001d001910	-0.199454	0.885086	1.16745	0.0143825	1.38426	0.0324257	0.528657	DHPE
Zm00001d001911	-1.31694	0.476633	5.80324	0.0137868	7.14618	0.000224704	-0.214729	AE
Zm00001d001912	0.17951	0.909008	1.25562	0.135456	1.09184	0.277191	1.41719	NoDiff
Zm00001d001913	-0.0817601	0.914318	-0.293504	0.463901	-0.195133	0.685625	-2.12449	NoDiff
Zm00001d001914	0.277343	0.719614	0.454278	0.264812	0.195907	0.747647	3.67973	NoDiff
Zm00001d001915	-3.83811	4.47826e-12	-0.976897	0.385236	2.88132	1.87222e-05	-1.15066	DLPE
Zm00001d001916	0.183592	0.872475	-0.477492	0.241931	-0.649198	0.239073	-0.572802	NoDiff
Zm00001d001917	1.0877	0.00653462	-0.625293	0.0701943	-1.69535	4.33525e-07	-0.0113269	AE
Zm00001d001918	8.25384	1.5969e-06	0.274973	0.841146	-7.96395	6.2562e-07	1.4241	DHPE
Zm00001d001923	-0.886598	0.00279393	1.4559	1.50236e-05	2.35939	2.16161e-13	-0.161988	AE
Zm00001d001924	-2.97357	0.000415945	-2.83427	0.00408274	0.156535	0.933509	-14.2066	TLPE
Zm00001d001928	0.297837	0.712194	0.0171065	0.988258	-0.268685	0.699686	1.17873	NoDiff
Zm00001d001929	0.063477	0.935372	-0.354775	0.399972	-0.402514	0.364737	-0.826133	NoDiff
Zm00001d001932	0.361343	0.645585	-0.2799	0.672213	-0.631034	0.238894	-0.00761357	NoDiff
Zm00001d001933	0.075933	0.948756	0.640305	0.134385	0.585708	0.262172	1.1887	NoDiff
Zm00001d001935	-0.013552	0.986566	0.172741	0.695837	0.200324	0.610376	0.602748	NoDiff
Zm00001d001936	0.188646	0.911714	-1.54282	0.1051	-1.71344	0.0776425	-0.89441	NoDiff
Zm00001d001937	0.0296802	0.980928	-0.440411	0.265942	-0.456362	0.427489	-0.991599	NoDiff
Zm00001d001939	0.677148	0.0734338	0.102553	0.837523	-0.560898	0.10384	1.497	NoDiff
Zm00001d001940	-0.161255	0.877357	-0.296709	0.540565	-0.116211	0.870781	-4.58879	NoDiff
Zm00001d001941	-0.0129388	0.99125	0.245606	0.686509	0.279203	0.622056	0.699909	NoDiff
Zm00001d001945	-0.426113	0.639941	-0.206167	0.828591	0.231546	0.720981	-2.40516	NoDiff
Zm00001d001946	-0.0562454	0.976757	0.282067	0.795791	0.363251	0.655933	0.518791	NoDiff
Zm00001d001947	0.254644	0.577183	-0.74862	0.0255234	-0.988347	0.00256158	-0.643067	NoDiff
Zm00001d001949	-0.547567	0.17704	-0.462827	0.559055	0.102449	0.91795	-7.06955	NoDiff
Zm00001d001951	-0.49914	0.320809	-0.52836	0.341743	-0.0101286	0.990134	-86.5307	NoDiff
Zm00001d001952	-0.181707	0.759046	-0.171182	0.753443	0.0270941	0.966125	-7.48002	NoDiff
Zm00001d001953	-0.530976	0.264056	0.119874	0.800545	0.666373	0.114312	-0.695871	NoDiff
Zm00001d001959	-0.173393	0.87955	-0.323994	0.546739	-0.128606	0.857093	-4.38623	NoDiff
Zm00001d001961	-3.43641	0.005082	-2.10913	0.0960647	1.3463	0.334831	-1.96901	NoDiff
Zm00001d001962	-0.362336	0.423181	-0.230545	0.701154	0.147912	0.832922	-3.31426	NoDiff
Zm00001d001963	-0.375918	0.948	-1.41842	0.702377	-1.02508	0.841854	-1.4883	NoDiff
Zm00001d001964	2.07164	0.0899307	-0.401049	0.767774	-2.44341	0.0348857	0.423756	AE
Zm00001d001966	-0.0252202	0.981535	-0.531464	0.229954	-0.494503	0.344387	-1.17659	NoDiff
Zm00001d001967	0.695921	0.0276707	-0.241514	0.581403	-0.921089	0.00439397	0.357188	NoDiff
Zm00001d001968	-0.218543	0.831436	0.708828	0.143245	0.941471	0.0278416	0.350486	NoDiff
Zm00001d001970	-0.774304	0.625616	4.1084	0.0177945	4.90257	0.00256409	0.118813	AE
Zm00001d001972	-0.48535	0.382379	0.0167411	0.984548	0.520686	0.354968	-0.921301	NoDiff
Zm00001d001973	-0.0393059	0.973628	-0.0435656	0.957654	0.00791449	0.991468	-3.85546	NoDiff
Zm00001d001974	0.358346	0.506388	0.130784	0.803986	-0.21307	0.708353	2.59413	NoDiff
Zm00001d001978	0.271754	0.759523	0.230296	0.754227	-0.0304261	0.967338	47.193	NoDiff
Zm00001d001979	-0.291659	0.639331	-0.440941	0.242748	-0.135381	0.831259	-5.69202	NoDiff
Zm00001d001980	0.447224	0.468942	-0.148744	0.800388	-0.579992	0.261443	0.418331	NoDiff
Zm00001d001983	-0.175162	0.877357	-0.571612	0.238986	-0.384338	0.549285	-1.90325	NoDiff
Zm00001d001984	4.35918	0.000309416	1.10502	0.318717	-3.24673	0.0536322	3.60605	NoDiff
Zm00001d001987	0.0776508	0.956089	0.723657	0.126208	0.665458	0.363714	1.17017	NoDiff
Zm00001d001988	0.21513	0.714961	0.0791526	0.878057	-0.117521	0.810696	2.95352	NoDiff
Zm00001d001989	0.996119	0.112146	-0.185739	0.835165	-1.16193	0.0858676	0.582893	NoDiff
Zm00001d001990	-0.704525	0.923212	-0.934123	0.827134	-0.203291	0.971304	-6.69289	NoDiff
Zm00001d001993	0.321209	0.823065	0.118637	0.927801	-0.181477	0.904298	2.7404	NoDiff
Zm00001d001994	0.407665	0.640954	0.268528	0.742489	-0.12928	0.877616	6.50928	NoDiff
Zm00001d001995	0.782597	0.038324	0.445476	0.207113	-0.320754	0.524191	4.91032	NoDiff
Zm00001d001996	-0.978392	0.507265	-0.257675	0.849263	0.745588	0.492124	-1.44233	NoDiff
Zm00001d001997	-0.171077	0.89299	0.135802	0.831406	0.322347	0.699686	-0.214039	NoDiff
Zm00001d001999	-0.0168687	0.985524	-0.384828	0.329744	-0.351489	0.49594	-1.23614	NoDiff
Zm00001d002000	-0.252484	0.860216	-0.434421	0.321806	-0.161348	0.883969	-4.46005	NoDiff
Zm00001d002001	-0.180316	0.912554	0.559648	0.485201	0.764386	0.149015	0.360086	NoDiff
Zm00001d002003	-0.40571	0.587061	0.450986	0.378472	0.869796	0.0142767	-0.131269	NoDiff
Zm00001d002004	0.676099	0.491945	0.286028	0.684771	-0.37243	0.685015	3.12879	NoDiff
Zm00001d002006	-0.394736	0.773652	0.105315	0.868157	0.508478	0.576745	-0.642314	NoDiff
Zm00001d002012	0.18979	0.737745	0.0822179	0.886421	-0.0925016	0.875055	3.6157	NoDiff
Zm00001d002022	-0.167756	0.813056	0.0733492	0.876565	0.257011	0.599017	-0.453778	NoDiff
Zm00001d002024	-0.112942	0.909481	-0.0955264	0.860549	0.0363707	0.960591	-3.88885	NoDiff
Zm00001d002025	-0.892525	0.0206758	-0.772173	0.0334446	0.138385	0.843093	-8.09542	NoDiff
Zm00001d002026	0.140329	0.934976	0.813137	0.198024	0.687713	0.484854	1.42707	NoDiff
Zm00001d002027	-0.0779291	0.936698	-0.0299615	0.962901	0.0601711	0.921342	-1.59408	NoDiff
Zm00001d002028	0.0767628	0.948	-0.324888	0.553928	-0.382732	0.512783	-0.759212	NoDiff
Zm00001d002029	0.0201087	0.976847	-0.148824	0.747733	-0.153256	0.749905	-1.09544	NoDiff
Zm00001d002033	0.0655475	0.946805	0.666667	0.0459055	0.619519	0.119221	1.1484	NoDiff
Zm00001d002034	-0.158911	0.832225	-0.50467	0.175992	-0.330898	0.500331	-1.99355	NoDiff
Zm00001d002036	0.186508	0.755606	-0.0753896	0.880533	-0.24655	0.571463	0.367019	NoDiff
Zm00001d002038	1.03809	0.147004	0.899435	0.0659329	-0.127692	0.902621	24.4717	NoDiff
Zm00001d002039	1.83432	0.29743	0.00558363	0.996749	-1.80769	0.239394	1.03109	NoDiff
Zm00001d002043	-1.25251	0.00146672	9.53476	7.75162e-13	10.8041	1.30294e-16	-0.17762	AE
Zm00001d002046	1.19675	0.0249287	0.222992	0.775103	-0.961415	0.034549	1.70709	NoDiff
Zm00001d002051	-0.872212	0.215509	-1.66064	0.00117654	-0.776201	0.348561	-2.33495	NoDiff
Zm00001d002052	1.09763	0.388605	-0.216891	0.881506	-1.2982	0.310489	0.548023	NoDiff
Zm00001d002053	-0.11651	0.874615	-0.676898	0.30369	-0.545129	0.452466	-1.4287	NoDiff
Zm00001d002054	0.350576	0.741052	0.0785688	0.925326	-0.250169	0.750683	1.87216	NoDiff
Zm00001d002056	0.125814	0.907412	0.22701	0.719615	0.11337	0.841419	2.59478	NoDiff
Zm00001d002058	0.166045	0.870729	-0.147921	0.813592	-0.294963	0.573276	-0.0366006	NoDiff
Zm00001d002063	-0.197643	0.866113	-0.821878	0.0755213	-0.609872	0.214803	-1.56698	NoDiff
Zm00001d002064	0.0532617	0.980527	1.24025	0.0512739	1.20185	0.228974	1.075	NoDiff
Zm00001d002065	-0.0210686	0.987947	-0.0124805	0.987503	0.0238834	0.980848	-1.19027	NoDiff
Zm00001d002066	0.156328	0.931571	-0.140729	0.880742	-0.281435	0.766986	-0.0142811	NoDiff
Zm00001d002068	0.808411	0.114305	0.359144	0.562976	-0.437488	0.493121	3.26905	NoDiff
Zm00001d002069	-0.690848	0.874131	-1.27737	0.514683	-0.566846	0.849661	-2.6935	NoDiff
Zm00001d002071	-1.91198	NA	-2.58053	0.014783	-0.653431	0.887904	-3.68609	NoDiff
Zm00001d002072	0.980852	0.85822	-1.55455	0.483949	-2.51045	0.225063	-0.598127	NoDiff
Zm00001d002074	2.20931	0.826148	-2.35165	0.313924	-4.54491	0.0977653	-0.667829	NoDiff
Zm00001d002075	1.24126	0.112035	-0.286808	0.815416	-1.50377	0.102428	0.460161	NoDiff
Zm00001d002079	-0.27943	0.904211	-0.347035	0.790983	-0.0490918	0.976974	-19.7785	NoDiff
Zm00001d002080	0.0496329	0.950417	-0.473128	0.106143	-0.507947	0.12149	-0.921987	NoDiff
Zm00001d002082	0.776255	0.174663	0.17088	0.828631	-0.59258	0.139844	1.77496	NoDiff
Zm00001d002083	-0.26105	0.942336	0.251683	0.883741	0.541552	0.824294	-0.150113	NoDiff
Zm00001d002084	0.266008	0.725066	-0.00246103	0.997453	-0.250746	0.698368	1.04747	NoDiff
Zm00001d002085	1.11157	0.00584074	0.663892	0.227518	-0.435464	0.493417	5.70422	NoDiff
Zm00001d002086	-0.143667	0.880885	0.287083	0.537506	0.449852	0.378584	0.186136	NoDiff
Zm00001d002087	0.10761	0.915169	0.705405	0.0975133	0.611951	0.280976	1.33033	NoDiff
Zm00001d002089	-1.02279	0.213309	-0.474711	0.609982	0.559791	0.608429	-2.12972	NoDiff
Zm00001d002090	-0.288722	0.694868	-0.068338	0.916481	0.232333	0.673309	-1.45105	NoDiff
Zm00001d002091	0.684698	0.177455	0.382413	0.216328	-0.283256	0.642914	4.72134	NoDiff
Zm00001d002093	1.28858	0.542206	1.99043	0.0237757	0.719819	0.727332	7.99478	NoDiff
Zm00001d002094	2.80645	1.17092e-05	0.718844	0.257482	-2.06975	0.00268979	2.73884	THPE
Zm00001d002095	-0.0204028	0.985198	0.039308	0.963308	0.0720717	0.90319	-0.0765973	NoDiff
Zm00001d002096	-0.766718	0.653274	0.491847	0.668867	1.27802	0.239394	-0.42197	NoDiff
Zm00001d002098	-0.0992647	0.954494	0.23896	0.812882	0.347694	0.679545	0.256357	NoDiff
Zm00001d002099	-0.228788	0.688829	0.782711	0.00505447	1.02763	0.000319448	0.367266	AE
Zm00001d002100	0.168214	0.938588	-1.0244	0.149762	-1.17248	0.138786	-0.83475	NoDiff
Zm00001d002101	2.93874	0.0557367	-0.065723	0.975282	-2.98352	0.0468786	0.91566	DHPE
Zm00001d002103	-0.0416072	0.96549	0.434729	0.337941	0.490376	0.173821	0.680633	NoDiff
Zm00001d002104	-0.0664798	0.934976	0.0180951	0.976444	0.098917	0.847178	-0.594042	NoDiff
Zm00001d002105	0.220001	0.819369	0.00827263	0.992613	-0.193783	0.747647	1.25262	NoDiff
Zm00001d002110	0.639851	0.710612	-0.467739	0.654299	-1.08696	0.334894	-0.0389547	NoDiff
Zm00001d002111	-0.835251	0.144963	9.75557	2.02173e-13	10.6117	1.47157e-15	0.0966026	AE
Zm00001d002115	0.110409	0.930928	0.24508	0.676906	0.144866	0.837128	2.11375	NoDiff
Zm00001d002119	1.20114	0.0145575	0.80729	0.0532444	-0.381651	0.49639	7.79941	NoDiff
Zm00001d002122	-0.0198423	0.989101	-1.04344	0.00545341	-1.00248	0.071512	-1.06797	NoDiff
Zm00001d002125	0.572472	0.413078	0.628737	0.282017	0.0671126	0.902248	16.6793	NoDiff
Zm00001d002126	-1.10568	0.000774136	-0.108812	0.861377	1.01536	0.000851254	-1.12493	DLPE
Zm00001d002127	6.15038	0.0120292	-0.392177	0.7998	-6.52324	0.00207906	0.534618	DHPE
Zm00001d002128	-2.38094	2.24365e-05	-1.38439	0.0262681	1.01785	0.209922	-2.16412	TLPE
Zm00001d002129	0.65491	0.205376	1.23714	0.000370459	0.599505	0.288639	4.10554	NoDiff
Zm00001d002130	0.00317029	0.997776	0.916833	0.215965	0.928362	0.316742	0.932852	NoDiff
Zm00001d002131	1.74777	0.503106	-1.23914	0.223834	-2.96488	0.0428561	-0.31619	AE
Zm00001d002132	-1.1235	0.326573	-0.338054	0.738297	0.802578	0.459531	-1.52753	NoDiff
Zm00001d002133	-0.794368	0.789233	-0.589603	0.770339	0.235983	0.914014	-4.43714	NoDiff
Zm00001d002135	-0.70806	0.150214	0.264451	0.625178	0.987335	0.0172594	-0.591489	NoDiff
Zm00001d002136	0.182663	0.95529	-1.90575	0.0408266	-2.05603	0.0306474	-0.929189	DLPE
Zm00001d002137	0.104175	0.96227	0.348008	0.75256	0.266851	0.849661	1.59232	NoDiff
Zm00001d002138	-1.50213	0.611836	0.00329488	0.999214	1.5339	0.471777	-0.988184	NoDiff
Zm00001d002139	0.0661081	0.970451	0.112938	0.920139	0.0665039	0.925559	2.09349	NoDiff
Zm00001d002140	0.0730011	0.928114	0.00623878	0.99257	-0.0504713	0.930283	1.88413	NoDiff
Zm00001d002141	-0.137198	0.834466	0.193981	0.61295	0.348371	0.399124	0.0314731	NoDiff
Zm00001d002143	2.13345	0.000270014	-0.231759	0.823434	-2.34863	0.000716544	0.645818	DHPE
Zm00001d002144	1.61779	0.459781	0.906613	0.613765	-0.689398	0.788914	5.77222	NoDiff
Zm00001d002145	0.253449	0.871616	-0.543153	0.497978	-0.789851	0.268281	-0.51397	NoDiff
Zm00001d002147	-0.114694	0.920324	0.0448888	0.950426	0.179886	0.782702	-0.474678	NoDiff
Zm00001d002148	-0.414822	0.410846	-0.33312	0.428203	0.0958272	0.885838	-5.85151	NoDiff
Zm00001d002149	-0.460375	0.428269	0.198466	0.812401	0.672521	0.292218	-0.503292	NoDiff
Zm00001d002150	-1.29482	0.376144	-0.313155	0.859306	0.993649	0.414137	-1.37774	NoDiff
Zm00001d002153	0.0660142	0.943281	-0.0198323	0.979682	-0.0731421	0.914355	0.46028	NoDiff
Zm00001d002154	0.476934	0.408326	0.411718	0.465987	-0.0525282	0.942232	30.5801	NoDiff
Zm00001d002155	-0.0242031	0.978404	-0.582224	0.0375309	-0.541944	0.112767	-1.1604	NoDiff
Zm00001d002156	0.246785	0.756969	-0.347967	0.549365	-0.579575	0.247313	-0.298435	NoDiff
Zm00001d002157	-0.0314488	0.978271	-1.06569	0.00658857	-1.01988	0.0271788	-1.07922	DLPE
Zm00001d002158	1.74689	0.00927905	-3.78808	8.965e-20	-5.51987	2.86519e-30	-0.896106	DLPE
Zm00001d002159	-3.32214	7.99566e-09	-2.57443	2.08986e-09	0.762309	0.364083	-3.31432	TLPE
Zm00001d002160	-4.56824	5.84639e-16	-3.50435	8.52962e-15	1.08122	0.0875626	-2.59184	TLPE
Zm00001d002161	-5.4735	3.75013e-09	-4.04586	7.61491e-08	1.43462	0.239683	-2.07622	TLPE
Zm00001d002163	-0.0510313	0.97491	1.10956	0.00136307	1.17337	0.0709417	0.817597	NoDiff
Zm00001d002164	6.52078	1.96835e-54	-0.237004	0.736402	-6.74256	7.0153e-48	0.700071	DHPE
Zm00001d002166	-0.0326102	0.98162	-0.331362	0.57558	-0.28754	0.693679	-1.38695	NoDiff
Zm00001d002169	0.0561533	0.969811	-0.281023	0.67085	-0.327124	0.613908	-0.823876	NoDiff
Zm00001d002174	4.10044	0.00146824	-0.19325	0.856952	-4.27591	0.000474811	0.746897	DHPE
Zm00001d002175	-0.132569	0.883419	-0.444587	0.328923	-0.300103	0.426898	-1.9803	NoDiff
Zm00001d002181	-0.109431	0.924317	8.66577	3.12506e-10	8.78844	9.68949e-11	0.817861	DHPE
Zm00001d002184	0.827122	0.0055162	0.115543	0.781207	-0.695644	0.0201134	1.47627	NoDiff
Zm00001d002185	0.244054	0.765492	-0.296192	0.635944	-0.527402	0.211397	-0.235901	NoDiff
Zm00001d002186	0.366079	0.701498	0.568992	0.388281	0.212207	0.688668	4.55617	NoDiff
Zm00001d002188	0.231886	0.874615	0.379138	0.618782	0.163795	0.894975	3.5636	NoDiff
Zm00001d002190	-0.0707796	0.940462	-0.103376	0.87622	-0.0202661	0.976764	-154.782	NoDiff
Zm00001d002192	-0.0162213	0.99093	0.823181	0.357559	0.854565	0.372146	0.867168	NoDiff
Zm00001d002200	0.278845	0.803909	0.0795297	0.936452	-0.187375	0.794569	2.04278	NoDiff
Zm00001d002208	4.11991	0.0019817	0.928316	0.517975	-3.18056	0.136666	3.06375	THPE
Zm00001d002213	1.79546	0.746434	-0.470369	0.88605	-2.25851	0.576368	0.30869	NoDiff
Zm00001d002234	0.762459	0.309292	0.878631	0.210918	0.132249	0.915556	14.2563	NoDiff
Zm00001d002235	-0.00979573	0.992252	0.350796	0.542083	0.377324	0.532859	0.774255	NoDiff
Zm00001d002240	1.08862	3.21139e-05	0.701843	0.080989	-0.371483	0.486977	6.86611	NoDiff
Zm00001d002241	0.210781	0.80219	0.334786	0.538564	0.141523	0.853478	3.55115	NoDiff
Zm00001d002243	-0.191423	0.751126	0.000404949	0.99928	0.208562	0.668423	-0.918861	NoDiff
Zm00001d002244	-0.288038	0.545342	-0.185605	0.671063	0.119268	0.781904	-3.26508	NoDiff
Zm00001d002246	-0.129479	0.905657	-0.2471	0.523206	-0.104577	0.886823	-4.27712	NoDiff
Zm00001d002249	7.20912	0.000272103	-1.03244	0.304621	-8.22129	1.44379e-07	-0.0126384	AE
Zm00001d002250	0.353568	0.73166	0.124053	0.901751	-0.219191	0.766673	2.39655	NoDiff
Zm00001d002252	-0.203274	0.677782	-0.59154	0.101547	-0.373502	0.35268	-2.0649	NoDiff
Zm00001d002253	0.21565	0.835814	-0.454693	0.618167	-0.654759	0.387966	-0.486729	NoDiff
Zm00001d002255	-0.745419	0.70376	-0.00419245	0.998784	0.758597	0.685625	-0.984004	NoDiff
Zm00001d002256	-0.205383	0.892322	0.580125	0.452706	0.794562	0.258743	0.311853	NoDiff
Zm00001d002257	0.604563	0.128273	0.0187585	0.980647	-0.570975	0.167382	1.10589	NoDiff
Zm00001d002258	0.686678	0.0955792	0.11551	0.842075	-0.554555	0.177777	1.58571	NoDiff
Zm00001d002259	-0.515716	0.292752	-0.0633014	0.917855	0.471854	0.170743	-1.17332	NoDiff
Zm00001d002261	-0.447938	0.223023	-0.457494	0.124352	0.00535499	0.991925	-32.3924	NoDiff
Zm00001d002262	2.70968	0.242839	-0.0204552	0.99389	-2.70798	0.174267	0.979668	NoDiff
Zm00001d002263	3.53653	0.0791398	-1.34449	0.177466	-4.86441	0.000504695	-0.251554	AE
Zm00001d002266	-0.149547	0.893043	0.00657256	0.994781	0.170535	0.847062	-0.861511	NoDiff
Zm00001d002267	0.727007	0.101897	0.199033	0.702783	-0.510122	0.323304	2.07682	NoDiff
Zm00001d002272	0.184829	0.809344	-0.00517044	0.994748	-0.176252	0.737363	1.00062	NoDiff
Zm00001d002274	0.86021	0.0170277	0.584683	0.241542	-0.262182	0.685478	7.54427	NoDiff
Zm00001d002275	-0.31128	0.773453	-0.217171	0.777823	0.105327	0.896337	-4.09781	NoDiff
Zm00001d002277	-1.28946	0.0281774	-0.733042	0.342366	0.576795	0.34777	-2.52718	NoDiff
Zm00001d002278	1.01816	0.268873	-0.329411	0.754707	-1.32649	0.0462041	0.343193	AE
Zm00001d002282	-0.456177	0.309749	0.110103	0.853586	0.582833	0.199927	-0.670124	NoDiff
Zm00001d002283	-1.48252	0.000981636	-0.91135	0.00555155	0.584318	0.304336	-2.78966	TLPE
Zm00001d002284	-0.369401	0.684271	0.529935	0.366323	0.919826	0.0119913	-0.000806487	NoDiff
Zm00001d002286	1.55818	0.187551	0.873224	0.421343	-0.668121	0.657413	5.69613	NoDiff
Zm00001d002287	-4.09719	1.20073e-15	-2.92185	7.31439e-13	1.18734	0.0646696	-2.32655	TLPE
Zm00001d002288	-0.373422	0.4831	2.71504	1.42212e-10	3.10264	2.74058e-11	0.452288	AE
Zm00001d002290	-1.08224	0.374081	3.38339	7.01529e-07	4.4914	1.20976e-11	-0.123774	AE
Zm00001d002292	-0.769301	0.0158323	0.244368	0.515612	1.02834	0.000516037	-0.641811	DLPE
Zm00001d002296	0.0629099	0.935342	-0.223945	0.55698	-0.271028	0.504141	-0.743942	NoDiff
Zm00001d002302	9.01145	7.61575e-77	-0.0505259	0.957177	-9.04186	1.28719e-63	0.942073	DHPE
Zm00001d002305	3.99088	7.25084e-18	0.258795	0.757066	-3.71466	1.45952e-10	1.43766	DHPE
Zm00001d002307	-0.752161	0.155621	0.375727	0.606497	1.14834	0.0194317	-0.505525	DLPE
Zm00001d002309	8.80031	6.77878e-08	-0.834745	0.411888	-9.62446	1.66887e-11	0.120867	AE
Zm00001d002312	10.257	7.24072e-14	-0.681527	0.366344	-10.924	7.57915e-16	0.250146	AE
Zm00001d002313	0.423192	0.464971	0.541469	0.234724	0.133256	0.8276	7.24657	NoDiff
Zm00001d002314	0.573234	0.450717	-0.735863	0.129836	-1.28969	0.00355221	-0.348926	AE
Zm00001d002315	0.430482	0.579747	-0.179513	0.766572	-0.589458	0.241503	0.325959	NoDiff
Zm00001d002316	-0.0987067	0.929837	0.722327	0.0890178	0.834546	0.127158	0.628723	NoDiff
Zm00001d002317	0.139553	0.872953	-0.181645	0.67036	-0.302871	0.566583	-0.268794	NoDiff
Zm00001d002323	0.199305	0.764734	-0.380768	0.342428	-0.563672	0.143635	-0.4563	NoDiff
Zm00001d002324	-1.42628	0.613512	0.406731	0.92612	1.85718	0.506951	-0.742821	NoDiff
Zm00001d002325	0.537623	0.453755	-0.605637	0.414576	-1.1333	0.043864	-0.269816	AE
Zm00001d002326	0.874835	0.00441683	-0.00612509	0.995065	-0.866879	0.0521301	0.999128	NoDiff
Zm00001d002328	1.48618	0.00639559	-0.263227	0.706961	-1.73375	2.2918e-05	0.527982	DHPE
Zm00001d002330	0.269614	0.82269	0.334719	0.658664	0.0738456	0.914014	6.91108	NoDiff
Zm00001d002332	-0.280115	0.618998	-0.154126	0.765293	0.14138	0.815636	-2.64021	NoDiff
Zm00001d002333	-0.365239	0.708645	0.983503	0.162476	1.36057	0.0109656	0.223044	AE
Zm00001d002334	-0.105957	0.899878	-0.273587	0.5347	-0.151295	0.785195	-2.86348	NoDiff
Zm00001d002338	1.35711	0.000273963	0.289128	0.606646	-1.05124	0.0065796	1.90677	DHPE
Zm00001d002339	-0.161123	0.827461	-0.271234	0.523312	-0.0929768	0.851816	-5.59348	NoDiff
Zm00001d002340	0.326151	0.428844	-0.224886	0.550593	-0.536052	0.0701844	0.0685105	NoDiff
Zm00001d002341	-0.426055	0.762383	0.249337	0.793609	0.690174	0.51602	-0.38645	NoDiff
Zm00001d002342	0.517136	0.462453	0.77049	0.193895	0.272578	0.723625	5.42022	NoDiff
Zm00001d002343	3.67343	8.36448e-08	2.51045	2.88153e-05	-1.15132	0.315741	18.2934	THPE
Zm00001d002344	0.437996	0.496506	-0.491546	0.221639	-0.916517	0.0218017	-0.232215	NoDiff
Zm00001d002345	0.0597647	0.960442	-0.415241	0.409253	-0.457945	0.425762	-0.883763	NoDiff
Zm00001d002346	-0.606787	0.0841432	3.96581	5.17884e-29	4.58823	2.03184e-33	0.259165	AE
Zm00001d002347	-0.909474	0.634491	-4.08238	9.60181e-13	-3.15697	0.000544901	-1.1219	DLPE
Zm00001d002348	1.70174	0.0379113	0.384804	0.75994	-1.2977	0.173773	2.08892	NoDiff
Zm00001d002349	0.970245	0.0650655	0.272481	0.696927	-0.685454	0.0295942	2.13015	NoDiff
Zm00001d002352	0.102806	0.917026	-0.301396	0.587042	-0.386229	0.401786	-0.622554	NoDiff
Zm00001d002353	0.495525	0.712911	1.19638	0.185108	0.72243	0.555133	2.90903	NoDiff
Zm00001d002356	-0.691253	0.202339	-0.175994	0.785966	0.530768	0.340179	-1.46981	NoDiff
Zm00001d002357	-0.297069	0.809217	0.819259	0.418534	1.13108	0.240918	0.268882	NoDiff
Zm00001d002358	-1.81907	0.00058274	-1.86767	0.000388384	-0.0356132	0.977557	-132.542	TLPE
Zm00001d002359	-0.408926	0.391357	-0.292538	0.693691	0.131568	0.87534	-4.22577	NoDiff
Zm00001d002362	0.0684653	0.936748	-0.422605	0.248778	-0.476869	0.215276	-0.843312	NoDiff
Zm00001d002364	-3.5943	0.373704	-1.2831	0.759806	2.3392	0.0789093	-1.28098	NoDiff
Zm00001d002366	-0.765847	0.0176822	-0.00923767	0.991146	0.773763	0.0412207	-0.998503	NoDiff
Zm00001d002367	3.83128	0.210188	-0.424663	0.833286	-4.22363	0.0771028	0.474343	NoDiff
Zm00001d002369	-2.23107	1.22222e-11	-0.933752	0.0302334	1.31298	0.00061134	-1.62391	DLPE
Zm00001d002371	-0.208837	0.835457	-0.40114	0.402991	-0.181065	0.792115	-3.51044	NoDiff
Zm00001d002372	1.71575	0.00254062	0.405291	0.588648	-1.29858	0.0243971	2.1107	THPE
Zm00001d002373	0.103451	0.924888	-0.0391004	0.959729	-0.131401	0.824882	0.355004	NoDiff
Zm00001d002377	-0.0655235	0.95143	-0.166603	0.773584	-0.0823018	0.916513	-3.9454	NoDiff
Zm00001d002378	0.795188	0.78838	5.14013	2.71216e-08	4.3627	0.0507452	2.48355	NoDiff
Zm00001d002382	-0.367549	0.514144	0.178382	0.715699	0.561747	0.186523	-0.444598	NoDiff
Zm00001d002384	0.436806	0.374003	0.160353	0.843601	-0.260951	0.744607	2.59728	NoDiff
Zm00001d002385	0.449878	0.484693	0.0515893	0.940421	-0.380234	0.502705	1.38369	NoDiff
Zm00001d002386	-0.0153126	0.985929	-0.128425	0.758965	-0.0980384	0.854806	-2.01626	NoDiff
Zm00001d002387	-0.271877	0.643654	-0.503042	0.176217	-0.21464	0.672174	-3.58614	NoDiff
Zm00001d002388	-0.131344	0.834115	-0.26995	0.453702	-0.122654	0.79855	-3.80253	NoDiff
Zm00001d002390	-0.21879	0.741545	0.837007	0.0319878	1.06975	0.00061965	0.406308	AE
Zm00001d002391	0.497517	0.363672	0.053838	0.936903	-0.431481	0.350384	1.33187	NoDiff
Zm00001d002394	-2.69413	0.219099	2.5747	0.147573	5.29955	0.154853	-0.739355	NoDiff
Zm00001d002395	-0.366835	0.545405	-0.581594	0.0247385	-0.20178	0.726221	-4.5034	NoDiff
Zm00001d002396	0.571554	0.544309	0.19623	0.81332	-0.367395	0.604285	2.36294	NoDiff
Zm00001d002403	0.347786	0.841802	-0.299082	0.799308	-0.625044	0.570615	-0.0481396	NoDiff
Zm00001d002405	0.143984	0.934118	-0.643913	0.460294	-0.77109	0.439254	-0.752247	NoDiff
Zm00001d002406	-3.19827	0.0460805	-1.77207	0.54523	1.44713	0.476919	-1.79803	NoDiff
Zm00001d002410	-4.42305	NA	-1.2173	0.0199503	3.21243	NA	-1.13497	NoDiff
Zm00001d002411	-0.686914	0.383832	5.57196	3.57799e-09	6.27309	1.3456e-12	0.207848	AE
Zm00001d002415	-1.42351	0.149217	-0.12716	0.92229	1.31116	0.175426	-1.10186	NoDiff
Zm00001d002416	1.11262	0.238154	1.84316	6.88602e-05	0.744585	0.521487	6.46175	THPE
Zm00001d002418	0.260823	0.725566	0.327215	0.522558	0.0802132	0.899311	6.25547	NoDiff
Zm00001d002419	-0.360719	0.451557	-0.422463	0.410285	-0.0449442	0.952427	-27.3192	NoDiff
Zm00001d002420	-0.337517	0.682163	0.339184	0.615901	0.693162	0.211919	-0.14221	NoDiff
Zm00001d002421	-0.235355	0.863526	-0.278706	0.75256	-0.03088	0.974431	-46.3547	NoDiff
Zm00001d002422	0.654696	0.232848	-0.079181	0.873917	-0.720701	0.138841	0.750666	NoDiff
Zm00001d002423	0.634586	0.154849	0.644526	0.0864608	0.0242449	0.970797	36.1856	NoDiff
Zm00001d002424	0.18804	0.917465	0.117109	0.900329	-0.0545974	0.964931	8.62753	NoDiff
Zm00001d002425	3.75224	0.000626702	-0.923721	0.124135	-4.64537	3.1772e-08	0.0232582	AE
Zm00001d002426	0.198295	0.852816	-0.588999	0.223834	-0.768017	0.220884	-0.642275	NoDiff
Zm00001d002428	0.932783	0.131555	-0.526086	0.392789	-1.43825	0.000965594	0.0448477	AE
Zm00001d002429	-0.71015	0.183562	-0.328948	0.590496	0.401638	0.449654	-2.16783	NoDiff
Zm00001d002430	-0.852006	0.47936	8.13607	1.31986e-07	9.00265	2.1789e-09	0.08245	AE
Zm00001d002431	-1.33095	0.125905	7.20322	1.73892e-06	8.55158	7.44199e-09	-0.226442	AE
Zm00001d002432	0.441454	0.507398	-0.579316	0.390723	-1.00464	0.120342	-0.321895	NoDiff
Zm00001d002433	-0.131764	0.863454	0.077536	0.891393	0.227862	0.613441	-0.328469	NoDiff
Zm00001d002436	-1.58506	0.440564	-0.10534	0.971958	1.49011	0.375407	-1.06893	NoDiff
Zm00001d002437	0.179945	0.90367	0.957752	0.288085	0.794949	0.368786	1.51115	NoDiff
Zm00001d002439	-2.383	0.000547256	-2.03898	0.00676854	0.358671	0.756796	-6.05395	TLPE
Zm00001d002440	-0.144411	0.906579	0.291549	0.591783	0.446946	0.428282	0.194197	NoDiff
Zm00001d002441	0.808592	0.277035	0.730136	0.288085	-0.0672311	0.929144	41.2474	NoDiff
Zm00001d002444	0.0524355	0.978271	2.0313	0.0426933	1.99359	0.0733059	1.04676	NoDiff
Zm00001d002446	1.06347	0.0705421	0.468539	0.38216	-0.579147	0.402301	3.42264	NoDiff
Zm00001d002447	-1.03494	0.435843	-0.777103	0.565555	0.265923	0.879257	-4.79384	NoDiff
Zm00001d002448	-0.532691	0.908525	4.25638	0.270437	4.81431	0.20418	0.355559	NoDiff
Zm00001d002449	-1.62969	0.00010185	-0.653095	0.333192	0.991154	0.125048	-1.71084	DLPE
Zm00001d002450	-0.348247	0.456035	-0.406223	0.356005	-0.0408116	0.944423	-30.431	NoDiff
Zm00001d002451	-0.649362	0.155298	-1.11236	0.00089042	-0.448086	0.318984	-3.15612	NoDiff
Zm00001d002454	1.66441	0.0309024	0.532602	0.451031	-1.11568	0.184715	2.72068	NoDiff
Zm00001d002455	0.252927	0.922138	0.673118	0.596146	0.438426	0.796433	2.23542	NoDiff
Zm00001d002456	-0.834343	0.0993237	-1.32586	0.00781871	-0.475895	0.554452	-3.41203	NoDiff
Zm00001d002458	4.03942	0.00389099	-1.10828	0.0384399	-5.13957	1.24252e-06	-0.0970102	AE
Zm00001d002462	-0.00800688	0.995955	0.88561	0.196347	0.90453	0.0964398	0.891804	NoDiff
Zm00001d002465	0.5729	0.44712	0.751922	0.197119	0.19337	0.829384	7.7178	NoDiff
Zm00001d002473	5.28891	0.107596	-3.20206	2.17613e-06	-8.47075	2.39552e-08	-0.781003	DLPE
Zm00001d002475	0.267438	0.725566	-0.175605	0.755082	-0.430775	0.348059	0.102028	NoDiff
Zm00001d002478	-0.268146	0.668895	-0.186968	0.66837	0.0973302	0.873736	-3.74127	NoDiff
Zm00001d002483	-0.645497	0.350335	9.02604	1.13286e-14	9.68305	1.40084e-16	0.254794	AE
Zm00001d002485	-0.308706	0.660855	-0.282716	0.548392	0.0390372	0.957143	-9.54329	NoDiff
Zm00001d002489	-1.00975	0.257007	1.06783	0.0698315	2.0942	0.000168012	-0.327423	AE
Zm00001d002490	0.504139	0.626055	0.320945	0.69607	-0.162514	0.894855	6.43941	NoDiff
Zm00001d002491	0.0122538	0.991847	-0.693049	0.0740986	-0.685099	0.193224	-1.04101	NoDiff
Zm00001d002497	-0.0444067	0.98162	8.13521	2.89497e-08	8.19587	2.95786e-07	0.900609	DHPE
Zm00001d002499	-0.0935599	0.913166	-0.121828	0.837023	-0.0128973	0.985757	-35.3198	NoDiff
Zm00001d002500	0.49411	0.672084	1.42983	0.00530419	0.959621	0.115854	2.54366	NoDiff
Zm00001d002501	-0.411363	0.457384	-0.207607	0.734862	0.220981	0.711652	-2.41848	NoDiff
Zm00001d002503	0.679651	0.342786	-0.0861181	0.892674	-0.753228	0.199602	0.727611	NoDiff
Zm00001d002504	0.435085	0.370269	0.37681	0.377471	-0.043494	0.936028	37.413	NoDiff
Zm00001d002506	-0.503624	0.459115	2.67602	1.07512e-08	3.20109	2.05538e-10	0.308525	AE
Zm00001d002510	0.552795	0.587061	0.510705	0.538927	-0.0324043	0.956461	92.0672	NoDiff
Zm00001d002511	-0.705846	0.0657185	-0.92013	0.0820857	-0.198928	0.812438	-7.02064	NoDiff
Zm00001d002512	0.329119	0.877178	0.856066	0.428097	0.546167	0.671867	2.43263	NoDiff
Zm00001d002519	0.466315	0.777667	-0.800891	0.509751	-1.24846	0.223424	-0.468223	NoDiff
Zm00001d002520	-0.463871	0.611702	-0.47749	0.463825	0.0100451	0.988374	-27.4679	NoDiff
Zm00001d002521	-1.64594	0.0359429	-1.23977	0.0874665	0.424145	0.676537	-4.15918	TLPE
Zm00001d002522	-2.09579	0.0457295	-1.07781	0.113439	1.03217	0.333101	-1.97107	NoDiff
Zm00001d002523	-1.3014	0.0341243	0.481463	0.402451	1.8005	6.33246e-05	-0.677197	DLPE
Zm00001d002524	0.192803	0.948164	3.57005	0.00905271	3.39926	0.00188141	1.27408	DHPE
Zm00001d002530	-0.407333	0.69672	0.696049	0.387101	1.12554	0.0645727	0.0505732	NoDiff
Zm00001d002531	-0.753051	0.203629	0.859341	0.0834503	1.62521	0.000589908	-0.226782	AE
Zm00001d002533	-1.33082	3.76664e-05	0.271991	0.650474	1.61895	3.85326e-06	-0.797471	DLPE
Zm00001d002534	0.117464	0.901916	-0.118607	0.905069	-0.220294	0.810292	-0.14183	NoDiff
Zm00001d002535	-0.815851	0.835964	0.333202	0.836389	1.16678	0.653761	-0.565001	NoDiff
Zm00001d002537	-0.281274	0.551787	0.103525	0.841517	0.401674	0.300185	-0.521347	NoDiff
Zm00001d002538	-0.800208	0.0704867	-0.118656	0.85964	0.700169	0.169069	-1.22391	NoDiff
Zm00001d002539	-0.925015	0.16626	-0.886169	0.103137	0.0534943	0.954564	-18.6677	NoDiff
Zm00001d002540	-1.71713	0.00162827	-0.349426	0.371604	1.37846	0.0124555	-1.25815	DLPE
Zm00001d002541	-1.2422	0.000394088	5.68158	5.37875e-29	6.94132	1.4727e-44	-0.180787	AE
Zm00001d002542	-0.141309	0.911714	0.978303	0.059043	1.1398	0.0832027	0.593869	NoDiff
Zm00001d002543	0.130349	0.901845	-0.499193	0.325714	-0.6161	0.30644	-0.707534	NoDiff
Zm00001d002544	0.367377	0.639711	0.0892969	0.915085	-0.265926	0.536011	1.83156	NoDiff
Zm00001d002545	-1.82716	0.00446327	-0.809091	0.251267	1.03095	0.211998	-1.79516	NoDiff
Zm00001d002546	0.0904552	0.931901	-0.82336	0.00143333	-0.901289	0.026001	-0.891048	NoDiff
Zm00001d002547	1.33763	0.010707	-1.08798	0.0703713	-2.40617	1.7079e-05	-0.301836	AE
Zm00001d002548	-0.220566	0.700796	0.305303	0.396674	0.542336	0.0768696	0.0261147	NoDiff
Zm00001d002549	-0.126643	0.959362	-0.529281	0.608329	-0.377745	0.737612	-1.71792	NoDiff
Zm00001d002550	0.185047	0.893795	0.857158	0.137469	0.689856	0.430646	1.59027	NoDiff
Zm00001d002551	0.32286	0.859186	-0.653532	0.494371	-0.96428	0.28801	-0.506816	NoDiff
Zm00001d002553	0.102392	0.917227	0.154365	0.741355	0.0691438	0.920386	2.71843	NoDiff
Zm00001d002554	0.50313	0.84793	-0.216545	0.906323	-0.707064	0.698503	0.289387	NoDiff
Zm00001d002556	-0.192364	0.975274	2.2377	0.496937	2.47289	0.628573	0.646404	NoDiff
Zm00001d002557	-1.34175	0.727395	0.624727	0.858784	1.96706	0.562962	-0.633934	NoDiff
Zm00001d002558	7.66266	9.9297e-07	-2.06697	0.00118122	-9.71164	6.58512e-12	-0.520063	DLPE
Zm00001d002562	0.163828	0.939118	-0.26886	0.823479	-0.409468	0.682652	-0.356618	NoDiff
Zm00001d002564	-6.09972	0.000213669	-4.86908	4.32879e-12	1.23939	0.6425	-2.3845	TLPE
Zm00001d002569	0.424799	0.886667	0.858116	0.581714	0.451091	0.805039	3.30761	NoDiff
Zm00001d002570	0.10309	0.961622	0.50106	0.680586	0.416265	0.735363	1.42661	NoDiff
Zm00001d002572	0.269841	0.65414	-0.160673	0.747706	-0.412454	0.268482	0.169392	NoDiff
Zm00001d002573	-0.486495	0.486902	-0.130316	0.868154	0.373961	0.447523	-1.49422	NoDiff
Zm00001d002576	-0.252651	0.883834	-0.292827	0.824016	-0.0154728	0.989681	-129.292	NoDiff
Zm00001d002579	-1.16758	0.00109793	-1.23062	3.71949e-05	-0.0475134	0.946706	-56.8214	TLPE
Zm00001d002580	0.0313442	0.969451	0.00443832	0.996058	-0.0117634	0.984981	1.72735	NoDiff
Zm00001d002584	-0.699986	0.468876	-0.724282	0.51295	-0.00861264	0.995679	-97.3181	NoDiff
Zm00001d002585	0.0022287	0.997389	-0.257003	0.478163	-0.24489	0.582392	-1.19799	NoDiff
Zm00001d002589	-0.0803464	0.965782	0.825729	0.327553	0.92274	0.3773	0.705438	NoDiff
Zm00001d002591	0.686176	0.337362	1.14846	0.0342753	0.481966	0.575937	4.93711	NoDiff
Zm00001d002593	0.234674	0.829596	-0.675126	0.0997088	-0.899027	0.0813918	-0.627299	NoDiff
Zm00001d002594	-0.272018	0.855529	-0.611437	0.471699	-0.315209	0.672832	-2.65189	NoDiff
Zm00001d002595	-0.2945	0.70094	-0.924676	0.0414608	-0.61784	0.257481	-1.77581	NoDiff
Zm00001d002597	-0.206691	0.922662	0.477174	0.301455	0.69493	0.548175	0.245749	NoDiff
Zm00001d002598	0.645395	0.222678	-0.173197	0.764374	-0.807356	0.0319904	0.476929	NoDiff
Zm00001d002599	1.46873	0.00176396	0.457721	0.541924	-1.00002	0.07788	2.51877	NoDiff
Zm00001d002600	0.178516	0.850609	1.03535	0.014837	0.870597	0.0144445	1.47223	NoDiff
Zm00001d002601	-0.165035	0.90902	0.0905016	0.911508	0.263942	0.733407	-0.393489	NoDiff
Zm00001d002602	0.340441	0.630965	-0.0726709	0.917855	-0.398555	0.386327	0.605979	NoDiff
Zm00001d002603	0.330836	0.527193	0.261108	0.586812	-0.0549408	0.923922	17.4714	NoDiff
Zm00001d002607	0.571307	0.23063	0.178814	0.781931	-0.379511	0.502958	2.22821	NoDiff
Zm00001d002609	0.634252	0.727772	-0.118916	0.886672	-0.736863	0.590178	0.622436	NoDiff
Zm00001d002610	1.25426	0.197881	-0.910366	0.135456	-2.15067	0.00206529	-0.205084	AE
Zm00001d002611	-0.481293	0.344821	-0.436004	0.270189	0.0598575	0.934405	-10.1722	NoDiff
Zm00001d002613	-0.662067	0.457751	2.68621	1.82089e-06	3.36799	1.51533e-13	0.162696	AE
Zm00001d002614	0.294005	0.737623	0.492975	0.341016	0.219188	0.776066	3.66528	NoDiff
Zm00001d002615	-0.286427	0.649542	-0.049859	0.941886	0.250546	0.667752	-1.29018	NoDiff
Zm00001d002617	0.0587467	0.961345	0.460278	0.400614	0.4143	0.328442	1.15826	NoDiff
Zm00001d002618	-2.78805	0.48421	-1.30862	0.763997	1.49181	0.717275	-1.63907	NoDiff
Zm00001d002621	-0.150317	0.852239	0.0821067	0.886357	0.251158	0.661061	-0.366756	NoDiff
Zm00001d002622	3.15868	0.743624	2.97876	0.703491	NA	NA	Inf	NoDiff
Zm00001d002623	-2.96009	0.00361734	-0.0778308	0.964655	2.89475	0.00552009	-1.01365	DLPE
Zm00001d002624	0.251101	0.698945	0.0844665	0.856854	-0.150991	0.794805	2.53142	NoDiff
Zm00001d002625	-0.372671	0.725204	-0.149358	0.787323	0.236291	0.790885	-1.95409	NoDiff
Zm00001d002626	0.315118	0.880685	1.2602	0.101461	0.95354	0.433918	1.90512	NoDiff
Zm00001d002628	1.08381	0.668902	0.597461	0.797213	-0.467545	0.881596	4.89257	NoDiff
Zm00001d002630	0.0746061	0.965782	-0.355781	0.710826	-0.409961	0.691742	-0.776155	NoDiff
Zm00001d002631	0.236046	0.723039	0.501912	0.222982	0.279496	0.569051	2.66312	NoDiff
Zm00001d002632	-1.19134	0.632562	-1.09759	0.365551	0.102607	0.965259	-12.9125	NoDiff
Zm00001d002634	7.42832	4.95004e-05	0.278743	0.833653	-7.13239	0.000106876	1.43961	DHPE
Zm00001d002639	-0.00500296	0.9956	-0.321659	0.444151	-0.302701	0.500535	-1.20231	NoDiff
Zm00001d002640	-0.0386064	0.979743	0.691107	0.320751	0.740406	0.112663	0.774744	NoDiff
Zm00001d002641	0.451341	0.612949	0.816465	0.06187	0.38494	0.655226	3.78078	NoDiff
Zm00001d002642	0.2088	0.856277	0.0527366	0.954987	-0.135221	0.883222	2.18713	NoDiff
Zm00001d002644	-0.0533334	0.965107	0.194413	0.77587	0.260834	0.640084	0.371887	NoDiff
Zm00001d002649	-0.0741497	0.961622	0.518027	0.381072	0.612296	0.460416	0.592667	NoDiff
Zm00001d002650	0.439742	0.541271	0.295191	0.62832	-0.133867	0.823898	7.02917	NoDiff
Zm00001d002654	0.396759	0.731142	0.227493	0.765831	-0.150491	0.900912	5.02613	NoDiff
Zm00001d002656	0.367555	0.623144	0.447891	0.491055	0.0924295	0.887442	8.09754	NoDiff
Zm00001d002658	0.126344	0.89284	0.684408	0.111634	0.572866	0.126665	1.40981	NoDiff
Zm00001d002659	0.030974	0.97538	-0.241897	0.624534	-0.260367	0.554452	-0.970235	NoDiff
Zm00001d002661	-0.297294	0.662765	-0.180305	0.717381	0.134204	0.833859	-2.99871	NoDiff
Zm00001d002662	0.228994	0.846207	0.443555	0.486854	0.223598	0.705092	2.94537	NoDiff
Zm00001d002663	0.0775617	0.935342	-0.685456	0.199276	-0.74493	0.203279	-0.894142	NoDiff
Zm00001d002668	-0.00131297	0.998683	0.990963	0.0466741	1.01265	0.0110343	0.925885	DHPE
Zm00001d002669	0.102966	0.942768	1.34932	0.00779414	1.26386	0.0710608	1.18105	NoDiff
Zm00001d002671	1.41846	0.151392	1.20906	0.415128	-0.187195	0.931949	25.1671	NoDiff
Zm00001d002673	-1.8008	8.89845e-05	-1.25835	0.017855	0.555338	0.429378	-3.38088	TLPE
Zm00001d002674	-0.605372	0.405942	9.96495	7.39704e-14	10.5892	7.53392e-15	0.288499	AE
Zm00001d002676	0.479017	0.353417	0.94593	0.00262322	0.479964	0.213721	3.51095	NoDiff
Zm00001d002677	-0.0583847	0.958636	-0.317814	0.550017	-0.24184	0.674286	-1.68357	NoDiff
Zm00001d002678	-1.19619	0.00137941	7.96524	1.7068e-16	9.17691	5.79051e-22	-0.146508	AE
Zm00001d002680	-0.913391	0.0456082	-0.151137	0.886062	0.777248	0.268281	-1.25842	NoDiff
Zm00001d002682	0.115468	0.904105	-0.129814	0.821595	-0.229286	0.699016	-0.20577	NoDiff
Zm00001d002684	0.512361	0.399886	-0.0237082	0.978252	-0.521613	0.24289	0.910081	NoDiff
Zm00001d002685	0.624204	0.321782	0.440713	0.306706	-0.163828	0.838259	8.73443	NoDiff
Zm00001d002687	1.74302	0.472378	0.366495	0.868596	-1.34924	0.605417	2.02171	NoDiff
Zm00001d002688	0.601169	0.349964	0.527081	0.363865	-0.0622524	0.906093	31.3177	NoDiff
Zm00001d002690	0.846127	0.123996	0.562892	0.298927	-0.270176	0.715779	7.09669	NoDiff
Zm00001d002694	-0.304725	0.751715	0.470813	0.394644	0.79362	0.199413	0.0357188	NoDiff
Zm00001d002695	-0.906873	0.433436	-1.60565	0.077775	-0.6856	0.626346	-2.61809	NoDiff
Zm00001d002696	0.199646	0.895544	-0.752659	0.129135	-0.934876	0.217657	-0.71463	NoDiff
Zm00001d002700	7.51954	0.236978	-0.858167	0.722149	-8.35464	7.55339e-06	0.117952	AE
Zm00001d002703	-0.507198	0.116967	-0.0172004	0.982645	0.50586	0.233863	-1.02746	NoDiff
Zm00001d002704	-0.0833964	0.956706	-1.31091	0.00135833	-1.21892	0.0157392	-1.10972	DLPE
Zm00001d002705	1.13538	0.00585103	2.10675	1.60223e-07	0.987729	0.0820785	5.60068	THPE
Zm00001d002708	0.822793	0.0567651	-1.24997	0.0145011	-2.05846	1.93534e-05	-0.526827	DLPE
Zm00001d002709	0.187232	0.989101	-0.107343	0.991146	-0.270283	0.976557	0.173713	NoDiff
Zm00001d002711	0.314953	0.546447	0.156981	0.75139	-0.14199	0.792248	3.9567	NoDiff
Zm00001d002712	1.31241	0.00744894	1.70839	0.0182366	0.414041	0.7628	12.0621	THPE
Zm00001d002713	-0.468231	0.649234	-0.461106	0.491085	0.0164759	0.985757	-23.3598	NoDiff
Zm00001d002715	0.169106	0.9146	0.028936	0.981222	-0.130778	0.892557	1.54934	NoDiff
Zm00001d002716	-0.0961449	0.901608	-0.465897	0.159589	-0.351662	0.410738	-1.64145	NoDiff
Zm00001d002718	0.618042	0.136439	-0.357679	0.536277	-0.959435	0.0324112	0.0975784	NoDiff
Zm00001d002721	0.333574	0.813721	0.966117	0.00299014	0.6421	0.469992	2.31929	NoDiff
Zm00001d002725	0.546104	0.26748	0.118831	0.817775	-0.408753	0.412867	1.78222	NoDiff
Zm00001d002726	0.546271	0.300403	0.596513	0.163768	0.0702342	0.930117	15.2569	NoDiff
Zm00001d002727	-0.0970391	0.933294	1.29714	5.87477e-06	1.41438	0.00132665	0.730847	DHPE
Zm00001d002730	0.612614	0.361876	0.0432796	0.959069	-0.551911	0.415748	1.23842	NoDiff
Zm00001d002731	-0.0250196	0.991235	0.685276	0.624863	0.722763	0.61284	0.828055	NoDiff
Zm00001d002733	-1.31463	0.13099	-0.390858	0.740655	0.949229	0.106654	-1.47514	NoDiff
Zm00001d002734	0.235151	0.799271	-0.185978	0.695837	-0.407747	0.495816	0.017719	NoDiff
Zm00001d002736	0.201824	0.893577	1.08064	0.187036	0.891587	0.336139	1.54463	NoDiff
Zm00001d002737	-0.293567	0.777145	-0.465505	0.371027	-0.160994	0.826321	-4.78359	NoDiff
Zm00001d002738	1.07395	0.381274	0.396905	0.681482	-0.66027	0.60715	2.80758	NoDiff
Zm00001d002739	-0.075745	0.919528	-0.112117	0.850037	-0.0195552	0.974787	-323.383	NoDiff
Zm00001d002740	-0.659509	0.515372	3.39566	1.04125e-06	4.06964	3.58053e-08	0.192109	AE
Zm00001d002741	4.28461	0.000267925	-0.749921	0.383022	-5.0256	8.82011e-07	0.169213	AE
Zm00001d002742	-0.0479381	0.960555	0.325618	0.483139	0.392567	0.364159	0.587021	NoDiff
Zm00001d002743	-2.00901	0.118612	-0.619855	0.51515	1.40214	0.284842	-1.40936	NoDiff
Zm00001d002744	-0.299741	0.874973	-0.635601	0.532027	-0.314037	0.775326	-2.78861	NoDiff
Zm00001d002748	-1.47471	0.59609	4.52978	0.172361	6.04414	0.00158785	-0.314699	AE
Zm00001d002751	-0.139431	0.876376	0.451832	0.181253	0.609127	0.182683	0.375332	NoDiff
Zm00001d002754	1.4294	0.00303601	-0.681391	0.0869801	-2.09145	1.23655e-08	0.0253211	AE
Zm00001d002756	0.686109	0.664356	-0.18654	0.877991	-0.861377	0.429576	0.474172	NoDiff
Zm00001d002757	0.366617	0.66237	0.00644926	0.994781	-0.343842	0.648348	1.10988	NoDiff
Zm00001d002758	10.0988	1.30171e-13	-1.16379	0.0154841	-11.245	6.10511e-17	-0.101611	AE
Zm00001d002759	1.6614	0.12854	0.878151	0.212348	-0.751959	0.564083	5.30929	NoDiff
Zm00001d002762	-2.07528	0.0147684	-0.152772	0.900237	1.93756	0.00554003	-1.06196	DLPE
Zm00001d002770	0.0853215	0.937222	-0.00172775	0.9988	-0.0747663	0.930911	1.09057	NoDiff
Zm00001d002771	-0.943061	0.520582	-0.480118	0.70343	0.487037	0.743727	-2.31852	NoDiff
Zm00001d002775	-0.230364	0.790413	0.19256	0.763997	0.438487	0.360647	-0.186163	NoDiff
Zm00001d002776	1.17817	0.384685	0.0949382	0.941574	-1.06032	0.334463	1.30042	NoDiff
Zm00001d002778	-0.403484	0.399067	-0.202489	0.685054	0.216758	0.671667	-2.40381	NoDiff
Zm00001d002781	0.0267695	0.985524	0.0619927	0.950281	0.0463245	0.95576	0.961389	NoDiff
Zm00001d002782	-0.424916	0.796184	-0.430268	0.700269	0.0184509	0.987545	-18.7624	NoDiff
Zm00001d002783	5.84635	0.00597451	-2.20547	0.00616857	-8.03943	9.0019e-08	-0.571242	DLPE
Zm00001d002784	-0.565682	0.351075	0.486543	0.303207	1.07148	0.0166849	-0.274449	AE
Zm00001d002787	0.574555	0.574728	0.0564236	0.965062	-0.509767	0.449998	1.27732	NoDiff
Zm00001d002788	3.32545	0.019544	-0.796002	0.401115	-4.10444	0.000279653	0.105722	AE
Zm00001d002789	0.0148616	0.991847	-0.27504	0.763676	-0.272952	0.781507	-1.08908	NoDiff
Zm00001d002790	0.878847	0.042583	0.442224	0.401658	-0.419312	0.534057	4.02163	NoDiff
Zm00001d002791	0.0314271	0.974776	0.64484	0.138954	0.630665	0.141998	1.00708	NoDiff
Zm00001d002794	1.04383	0.02509	-0.184368	0.640129	-1.21031	0.00428708	0.590311	DHPE
Zm00001d002796	0.143047	0.933936	0.510402	0.464792	0.385704	0.659301	1.69937	NoDiff
Zm00001d002797	0.445002	0.504346	-0.069463	0.909076	-0.4954	0.371688	0.698626	NoDiff
Zm00001d002798	-0.295923	NA	0.995644	0.225694	1.30444	0.401973	0.349433	NoDiff
Zm00001d002799	-4.05022	0.387051	-5.55997	0.00044185	-1.52042	0.613961	-2.02791	NoDiff
Zm00001d002801	0.599474	0.508246	0.858651	0.125781	0.279361	0.727948	6.19625	NoDiff
Zm00001d002802	-1.06172	0.432338	-0.5837	0.557259	0.495118	0.676462	-2.53421	NoDiff
Zm00001d002810	-0.593194	0.379865	-0.666745	0.290015	-0.0614251	0.955153	-24.9979	NoDiff
Zm00001d002811	-0.257982	0.861794	-0.21902	0.775565	0.0573025	0.956921	-5.79326	NoDiff
Zm00001d002812	-0.176621	0.826054	-0.115176	0.845278	0.077328	0.905414	-3.06911	NoDiff
Zm00001d002814	0.821328	0.00992613	1.23649	5.11942e-07	0.43192	0.283836	6.45704	THPE
Zm00001d002815	-0.442195	0.621778	-0.421034	0.539725	0.0427027	0.955937	-12.1316	NoDiff
Zm00001d002817	1.82275	0.00176396	0.756382	0.308393	-1.05052	0.0981989	3.70834	NoDiff
Zm00001d002818	5.91794	0.0241447	-0.708727	0.642343	-6.6112	0.00212057	0.231757	AE
Zm00001d002819	0.611973	0.214367	0.571345	0.113332	-0.0220889	0.977354	671.161	NoDiff
Zm00001d002821	-2.04206	0.08386	6.51695	0.00166527	8.59188	2.6911e-08	-0.525342	DLPE
Zm00001d002822	-0.446647	0.471025	-0.0955055	0.893614	0.365085	0.59125	-1.38484	NoDiff
Zm00001d002823	-0.447172	0.619821	-1.00364	0.0892843	-0.546869	0.49729	-2.26121	NoDiff
Zm00001d002824	0.187499	0.88035	0.164176	0.783572	-0.0128856	0.988986	48.1082	NoDiff
Zm00001d002825	0.26161	0.90902	0.44685	0.658908	0.206584	0.899071	3.40642	NoDiff
Zm00001d002826	-0.303352	0.894907	-1.76537	0.0437861	-1.43858	0.0396971	-1.24373	DLPE
Zm00001d002827	0.305194	0.60153	0.0394908	0.963161	-0.250885	0.658734	1.4257	NoDiff
Zm00001d002828	-2.01328	0.0882392	-0.173333	0.940481	1.84554	0.0370265	-1.08706	DLPE
Zm00001d002833	1.56928	0.112081	0.307987	0.756179	-1.24373	0.249615	1.86864	NoDiff
Zm00001d002835	-0.404254	0.604635	0.352559	0.563178	0.771319	0.22174	-0.221517	NoDiff
Zm00001d002836	0.127662	0.927305	1.56194	0.0010173	1.45408	0.0284132	1.21773	DHPE
Zm00001d002837	0.0852531	0.940437	0.275806	0.575945	0.207214	0.750805	1.55873	NoDiff
Zm00001d002842	-0.0168792	0.991168	-0.750254	0.121388	-0.719558	0.32019	-1.0879	NoDiff
Zm00001d002847	-6.40291	2.82574e-05	-1.01119	0.558587	5.40276	0.00056573	-1.02397	DLPE
Zm00001d002848	-3.58727	7.83491e-08	2.54986	0.123943	6.17075	2.39626e-16	-0.862858	DLPE
Zm00001d002849	-1.72885	0.493043	-1.27994	0.392808	0.459484	0.858131	-3.96323	NoDiff
Zm00001d002850	-1.22354	0.174764	0.823794	0.549112	2.05995	0.0438658	-0.515248	DLPE
Zm00001d002851	0.75557	0.543673	1.5744	0.0367626	0.840306	0.502469	3.92931	NoDiff
Zm00001d002853	0.163794	0.9108	-0.327208	0.636518	-0.480569	0.466813	-0.472395	NoDiff
Zm00001d002854	0.504792	0.291532	-0.679919	0.0224021	-1.17074	0.000158434	-0.355428	AE
Zm00001d002856	0.925645	0.132961	0.616184	0.365966	-0.287313	0.775848	7.41902	NoDiff
Zm00001d002857	-0.200487	0.799044	-0.345095	0.433974	-0.128931	0.806023	-4.62732	NoDiff
Zm00001d002859	-0.0117134	0.989725	-0.261606	0.555847	-0.234005	0.604427	-1.3154	NoDiff
Zm00001d002860	0.716159	0.496093	0.650649	0.346762	-0.0458177	0.974285	66.9567	NoDiff
Zm00001d002863	-0.489515	0.676111	-0.177653	0.856775	0.322895	0.734876	-1.84756	NoDiff
Zm00001d002864	0.0559029	0.951092	-0.318827	0.430998	-0.358285	0.432153	-0.848257	NoDiff
Zm00001d002865	-0.250846	0.737312	0.812565	0.0692591	1.08238	0.0207792	0.340824	AE
Zm00001d002868	0.083213	0.937036	-0.451561	0.232879	-0.51889	0.283865	-0.806674	NoDiff
Zm00001d002869	-0.190891	0.834485	-0.0223622	0.980479	0.183095	0.805542	-1.14561	NoDiff
Zm00001d002870	-0.437137	0.783107	0.609193	0.498347	1.0612	0.294072	-0.042369	NoDiff
Zm00001d002871	0.0774539	0.963644	1.34159	0.136379	1.28231	0.159177	1.12875	NoDiff
Zm00001d002873	-0.596588	0.295101	-0.298264	0.662481	0.318149	0.610154	-2.36521	NoDiff
Zm00001d002875	1.05196	0.00367572	0.295846	0.563741	-0.73917	0.0804662	2.18649	NoDiff
Zm00001d002876	0.237631	0.795406	0.0746521	0.926588	-0.151039	0.7604	2.23715	NoDiff
Zm00001d002878	-0.168276	0.89949	0.115919	0.875716	0.307112	0.649629	-0.262202	NoDiff
Zm00001d002879	-0.543959	0.479072	0.255147	0.727232	0.820401	0.0685274	-0.483709	NoDiff
Zm00001d002880	0.243213	0.788237	-1.09796	2.4356e-05	-1.32856	0.000857697	-0.7789	DLPE
Zm00001d002882	-0.840487	0.329945	-0.764725	0.178661	0.0888657	0.94316	-11.2807	NoDiff
Zm00001d002884	2.04206	0.0520648	1.19337	0.349032	-0.831158	0.644622	7.09543	NoDiff
Zm00001d002889	-0.0921718	0.929981	-0.11139	0.876761	-0.006574	0.993965	-17.1191	NoDiff
Zm00001d002890	1.12859	0.272254	-0.544255	0.326017	-1.65208	0.0262342	0.0907723	AE
Zm00001d002891	0.0514683	0.95209	0.04538	0.932534	0.0108548	0.986522	2.50702	NoDiff
Zm00001d002896	-0.297536	0.686901	-0.219916	0.632658	0.0914427	0.901288	-4.43782	NoDiff
Zm00001d002898	2.02307	0.0430351	-2.99134	4.37602e-06	-4.9938	1.76707e-13	-0.802894	DLPE
Zm00001d002899	0.213698	0.911315	-1.2213	0.168377	-1.41605	0.0517508	-0.824294	NoDiff
Zm00001d002904	1.10654	0.373799	-1.46239	0.0157273	-2.54744	5.12324e-05	-0.535048	DLPE
Zm00001d002905	-0.695883	0.311677	-0.387347	0.418396	0.321129	0.68802	-2.73164	NoDiff
Zm00001d002919	0.0929717	0.92797	-0.396774	0.413226	-0.478135	0.243402	-0.748967	NoDiff
Zm00001d002925	-0.00388667	0.996708	-0.273109	0.550647	-0.256582	0.574379	-1.23285	NoDiff
Zm00001d002928	-0.763741	0.244718	-0.0210664	0.981222	0.762879	0.120162	-1.01535	NoDiff
Zm00001d002929	-1.12203	0.047591	-1.26145	0.0321877	-0.121992	0.925413	-15.8593	TLPE
Zm00001d002933	-0.213043	0.875902	-0.0189996	0.987902	0.205562	0.815564	-1.14614	NoDiff
Zm00001d002934	0.892396	0.685185	0.812682	0.739481	-0.0694946	0.984588	49.0123	NoDiff
Zm00001d002936	-0.0533811	0.966761	0.164006	0.804857	0.229597	0.714642	0.309025	NoDiff
Zm00001d002937	6.2186	1.71545e-33	-0.806722	0.193843	-7.01072	4.03475e-46	0.140168	AE
Zm00001d002938	0.398589	0.547769	-0.0574563	0.941574	-0.444529	0.318307	0.713202	NoDiff
Zm00001d002939	0.389546	0.612632	-0.647007	0.124024	-1.02205	0.0466521	-0.428951	AE
Zm00001d002941	-0.0317289	0.972545	-0.501956	0.0665528	-0.4552	0.235977	-1.22193	NoDiff
Zm00001d002942	0.0651085	0.930924	0.271065	0.526553	0.224114	0.621252	1.33821	NoDiff
Zm00001d002943	-0.297006	0.756903	-0.559344	0.0997088	-0.246891	0.748451	-3.31818	NoDiff
Zm00001d002944	0.238237	0.704114	0.190079	0.673958	-0.0338827	0.953695	28.3476	NoDiff
Zm00001d002945	-0.0340825	0.968607	-0.280033	0.377065	-0.229849	0.630273	-1.52971	NoDiff
Zm00001d002946	0.0406136	0.96549	0.0419571	0.946645	0.0162568	0.980805	1.79603	NoDiff
Zm00001d002950	0.224578	0.875797	0.580474	0.457844	0.364397	0.415864	2.24441	NoDiff
Zm00001d002951	0.0598478	0.973955	0.784136	0.33618	0.742726	0.413727	1.11793	NoDiff
Zm00001d002952	0.628787	0.847908	-0.0932968	0.974601	-0.693324	0.78554	0.725664	NoDiff
Zm00001d002953	0.305612	0.673195	-0.198912	0.671781	-0.491389	0.302334	0.10178	NoDiff
Zm00001d002954	-1.81583	4.59121e-07	-0.496294	0.58974	1.3344	0.0305635	-1.3706	DLPE
Zm00001d002955	3.98574	0.226476	-0.845207	0.678491	-4.78923	0.0180505	0.0811446	AE
Zm00001d002956	-0.845575	0.070347	0.229703	0.70146	1.09439	0.0171975	-0.690649	DLPE
Zm00001d002959	0.447134	0.855559	1.55501	0.0741975	1.13668	0.496504	2.20761	NoDiff
Zm00001d002961	-0.316889	0.674585	0.117362	0.80151	0.451471	0.401787	-0.530077	NoDiff
Zm00001d002962	0.225925	0.717411	0.633198	0.0596583	0.420795	0.246656	2.12427	NoDiff
Zm00001d002964	0.574908	0.636569	-0.0187445	0.99005	-0.5872	0.40205	0.916938	NoDiff
Zm00001d002965	-0.699061	0.809217	-0.86699	0.625178	-0.143922	0.939636	-9.66325	NoDiff
Zm00001d002966	-0.34656	0.623898	-1.59731	1.31421e-06	-1.23037	0.000153911	-1.34752	DLPE
Zm00001d002967	0.281297	0.780252	-0.556427	0.37125	-0.82612	0.192363	-0.483687	NoDiff
Zm00001d002968	-1.71319	0.0151807	-0.521982	0.602929	1.21269	0.135674	-1.44298	NoDiff
Zm00001d002969	0.0443412	0.970756	-0.377275	0.436508	-0.400789	0.460975	-0.930562	NoDiff
Zm00001d002970	-0.268319	0.931202	-4.48073	0.00079659	-4.17875	5.03269e-18	-1.0218	DLPE
Zm00001d002971	0.25882	0.864724	-3.08546	1.07503e-11	-3.32624	1.76707e-13	-0.960571	DLPE
Zm00001d002978	0.0148026	0.987801	0.183541	0.695027	0.185396	0.71861	0.859958	NoDiff
Zm00001d002979	-3.43642	0.00867707	-2.7869	0.0481678	0.670184	0.744607	-3.80375	TLPE
Zm00001d002980	-0.348327	0.514573	-0.507377	0.0894846	-0.143706	0.791039	-6.07015	NoDiff
Zm00001d002990	6.51913	3.61327e-06	-0.45957	0.520374	-6.96296	1.51243e-07	0.458573	AE
Zm00001d002992	0.874565	0.0979466	1.1877	0.00389827	0.326118	0.687166	8.48638	THPE
Zm00001d002993	0.184407	0.940462	0.91654	0.439889	0.751522	0.629324	1.56117	NoDiff
Zm00001d002999	-0.929256	0.513514	1.00887	0.295604	1.94945	0.0897479	-0.296466	NoDiff
Zm00001d003002	-0.255466	0.701979	0.0394284	0.960052	0.311949	0.55944	-0.737833	NoDiff
Zm00001d003003	-0.433379	0.75861	-0.0469813	0.974723	0.401886	0.71595	-1.15399	NoDiff
Zm00001d003005	0.437033	0.587248	-0.188306	0.816506	-0.608547	0.422947	0.298569	NoDiff
Zm00001d003007	-0.157965	0.860168	-0.364992	0.409798	-0.193947	0.707326	-2.86658	NoDiff
Zm00001d003009	-1.47031	0.447185	0.124938	0.942533	1.61918	0.243588	-0.898592	NoDiff
Zm00001d003012	-1.12084	0.472537	0.393221	0.737407	1.51758	0.145444	-0.67123	NoDiff
Zm00001d003014	-0.326561	0.64833	-0.289252	0.55944	0.0563279	0.936559	-7.48708	NoDiff
Zm00001d003015	-1.6744	0.00713691	-1.43723	0.00143698	0.252418	0.813814	-7.1842	TLPE
Zm00001d003016	0.0135413	0.992152	-2.51156	3.35409e-14	-2.50518	2.97907e-10	-1.00337	DLPE
Zm00001d003017	-0.356697	0.756515	0.461513	0.339577	0.838864	0.218677	-0.0544934	NoDiff
Zm00001d003020	0.0591704	0.982645	0.433322	0.779115	0.388871	0.82762	1.18885	NoDiff
Zm00001d003024	0.822343	0.313564	0.353645	0.6706	-0.450706	0.656506	3.22124	NoDiff
Zm00001d003027	-1.24875	0.140342	0.374609	0.78648	1.63704	0.0577115	-0.72073	NoDiff
Zm00001d003031	0.170682	0.855559	0.201551	0.731293	0.0436823	0.952427	6.06592	NoDiff
Zm00001d003032	3.91142	0.524142	1.2718	0.745703	-2.63243	0.733407	3.81035	NoDiff
Zm00001d003033	0.804497	0.105372	0.358551	0.567316	-0.433607	0.440561	3.28035	NoDiff
Zm00001d003034	-0.224582	0.790413	-0.0691704	0.901438	0.175	0.779501	-1.55395	NoDiff
Zm00001d003035	-2.90259	0.000936718	1.30523	0.189366	4.22606	1.44206e-12	-0.832556	DLPE
Zm00001d003037	-1.10452	0.468233	3.10833	0.164036	4.23607	0.0112651	-0.148537	AE
Zm00001d003038	1.2799	0.00960416	0.191142	0.748447	-1.07613	0.0243971	1.55924	DHPE
Zm00001d003039	0.581067	0.328475	0.612509	0.288616	0.0454162	0.960544	22.2437	NoDiff
Zm00001d003040	-0.360392	0.613714	0.185749	0.782612	0.558242	0.0666736	-0.433441	NoDiff
Zm00001d003041	0.177782	0.938428	0.296559	0.824637	0.149073	0.926598	2.92093	NoDiff
Zm00001d003047	-0.571292	0.287773	-0.635021	0.1446	-0.0462885	0.951068	-36.637	NoDiff
Zm00001d003048	-1.34076	0.0821193	-0.36053	0.639241	0.998527	0.172638	-1.42302	NoDiff
Zm00001d003049	0.194849	0.727514	-0.14461	0.746975	-0.323206	0.414711	0.041192	NoDiff
Zm00001d003050	-0.267866	0.832225	-0.00781837	0.994517	0.274634	0.757276	-1.02398	NoDiff
Zm00001d003051	5.7264	0.041693	-0.570978	0.717381	-6.27956	0.00554358	0.356386	AE
Zm00001d003057	0.21445	0.810325	-0.711291	0.238875	-0.911056	0.16319	-0.674473	NoDiff
Zm00001d003058	0.855789	0.200237	0.247869	0.799496	-0.59715	0.504864	2.15164	NoDiff
Zm00001d003059	0.444864	0.636518	1.21314	0.0387762	0.786734	0.362236	2.57087	NoDiff
Zm00001d003062	0.189349	0.772599	-0.228457	0.522562	-0.402824	0.316376	-0.212569	NoDiff
Zm00001d003064	-2.61736	3.23874e-05	-1.30361	0.0385983	1.32961	0.0563338	-1.76304	DLPE
Zm00001d003066	0.449814	0.548821	0.174294	0.805632	-0.25412	0.72091	2.831	NoDiff
Zm00001d003067	2.93867	0.0686468	0.00190026	0.998911	-2.90948	0.0632848	1.02107	NoDiff
Zm00001d003068	0.874864	0.537705	1.91629	0.0177945	1.06785	0.387488	3.99694	NoDiff
Zm00001d003071	0.0819058	0.933584	-0.109177	0.857167	-0.172354	0.698187	-0.29974	NoDiff
Zm00001d003072	0.586828	0.120203	-0.428232	0.263437	-1.00073	0.000236799	-0.0294066	AE
Zm00001d003076	0.141955	0.900916	0.0329056	0.958365	-0.088209	0.911914	2.31619	NoDiff
Zm00001d003081	-0.310332	0.628787	-0.427877	0.171929	-0.104316	0.872023	-7.76481	NoDiff
Zm00001d003083	0.0602247	0.956332	-0.31257	0.508762	-0.360735	0.501763	-0.819799	NoDiff
Zm00001d003084	-0.513798	0.339557	-0.420081	0.400228	0.1112	0.833535	-6.18502	NoDiff
Zm00001d003085	0.231684	0.913926	1.14316	0.349756	0.932526	0.480177	1.64598	NoDiff
Zm00001d003087	0.202831	0.862571	0.397665	0.533451	0.204657	0.765154	2.81495	NoDiff
Zm00001d003088	0.935203	0.328094	2.87467	0.000259174	1.96633	0.0977085	3.33135	THPE
Zm00001d003089	0.41259	0.587899	1.32798	1.49741e-05	0.932978	0.0624032	2.24709	NoDiff
Zm00001d003090	-0.972724	0.0730435	10.1458	4.3994e-14	11.1398	3.53787e-17	-0.00104464	AE
Zm00001d003099	0.00142009	0.998683	0.311043	0.662357	0.325347	0.687124	0.827475	NoDiff
Zm00001d003101	-0.299351	0.513252	-0.0375534	0.965483	0.276125	0.659097	-1.1834	NoDiff
Zm00001d003102	1.20928	0.218132	-0.420559	0.59705	-1.61307	0.0280864	0.259868	AE
Zm00001d003103	0.311766	0.589955	0.140027	0.793507	-0.157216	0.772845	3.34825	NoDiff
Zm00001d003104	0.906318	0.0354761	0.729807	0.204703	-0.158379	0.852804	15.6035	NoDiff
Zm00001d003106	-0.134951	0.860168	0.427678	0.318154	0.581655	0.107174	0.3749	NoDiff
Zm00001d003107	0.0439092	0.981299	0.745267	0.259712	0.712879	0.471284	1.06697	NoDiff
Zm00001d003108	1.08713	0.107093	0.092868	0.911096	-0.977934	0.171549	1.29054	NoDiff
Zm00001d003109	0.16711	0.831922	0.387172	0.325932	0.237672	0.680773	2.22992	NoDiff
Zm00001d003110	-2.61268	1.50313e-14	0.461973	0.524112	3.0908	4.14028e-12	-0.898729	DLPE
Zm00001d003112	0.0594131	0.954585	0.184632	0.804155	0.140702	0.872263	1.41004	NoDiff
Zm00001d003114	-1.29073	0.00128121	-0.680879	0.0367902	0.626511	0.151801	-2.31412	TLPE
Zm00001d003115	-0.58961	0.583061	3.41362	0.00136777	4.02197	0.000393975	0.257267	AE
Zm00001d003116	-0.837055	0.0985341	-0.184686	0.77587	0.668888	0.249967	-1.37656	NoDiff
Zm00001d003118	-0.383104	0.472967	0.259192	0.5995	0.660528	0.0231427	-0.314722	NoDiff
Zm00001d003119	0.045962	0.965374	-0.235863	0.671551	-0.270083	0.620729	-0.855474	NoDiff
Zm00001d003120	0.114154	0.962911	-0.139656	0.930568	-0.247604	0.873226	-0.266518	NoDiff
Zm00001d003123	0.590596	0.369682	0.290612	0.668475	-0.289197	0.539948	3.62034	NoDiff
Zm00001d003124	0.23779	0.757358	-0.413481	0.287566	-0.63472	0.175491	-0.410874	NoDiff
Zm00001d003125	0.645031	0.458318	0.292787	0.771729	-0.335161	0.77733	3.38916	NoDiff
Zm00001d003127	0.0702074	0.940462	0.0145034	0.985303	-0.0368493	0.938995	4.13171	NoDiff
Zm00001d003128	-2.07935	0.00282763	6.38095	0.00066366	8.47887	1.68624e-08	-0.536357	DLPE
Zm00001d003129	-0.946908	0.0564849	-0.485908	0.255055	0.474806	0.445242	-2.38693	NoDiff
Zm00001d003136	-0.369972	0.884146	2.4569	0.0146015	2.85253	0.0314686	0.43758	AE
Zm00001d003143	1.74028	0.000251595	0.244586	0.663646	-1.47807	0.00185378	1.59769	DHPE
Zm00001d003144	3.18492	0.00036873	0.961852	0.380335	-2.2061	0.046247	3.48841	THPE
Zm00001d003147	-0.361657	0.670998	-0.590447	0.220605	-0.217522	0.759755	-4.1743	NoDiff
Zm00001d003148	-0.379377	0.404668	0.568342	0.129728	0.963997	0.00841529	0.00514311	NoDiff
Zm00001d003149	1.60802	0.00315941	0.219582	0.797936	-1.37059	0.0478491	1.56518	DHPE
Zm00001d003155	-1.24703	0.115318	0.564879	0.619726	1.83155	0.0144493	-0.626442	DLPE
Zm00001d003157	-0.15264	0.845049	0.573914	0.161141	0.744796	0.0495338	0.429552	NoDiff
Zm00001d003158	-1.34552	0.0772143	10.5452	2.58708e-14	11.8996	2.99626e-19	-0.228123	AE
Zm00001d003159	0.25772	0.683669	-0.506247	0.188254	-0.746667	0.00453312	-0.467153	NoDiff
Zm00001d003161	0.793938	0.304335	-0.131399	0.903164	-0.912838	0.186632	0.630286	NoDiff
Zm00001d003162	-0.682428	0.51295	0.370522	0.682838	1.0763	0.027662	-0.457471	AE
Zm00001d003163	-0.948092	0.413787	0.0378349	0.986314	1.00241	0.442223	-0.930663	NoDiff
Zm00001d003164	0.255683	0.762081	-0.4459	0.480441	-0.689028	0.0869306	-0.423233	NoDiff
Zm00001d003166	0.373238	0.552403	-0.0328243	0.965062	-0.393718	0.373995	0.830028	NoDiff
Zm00001d003167	-0.423111	0.474245	-0.205378	0.686509	0.235964	0.695521	-2.3189	NoDiff
Zm00001d003172	0.836845	0.345184	0.546192	0.326262	-0.281155	0.777711	6.59281	NoDiff
Zm00001d003174	1.08596	0.319869	-0.118716	0.925567	-1.18156	0.166808	0.751589	NoDiff
Zm00001d003175	1.01278	0.378596	-0.258935	0.808363	-1.24727	0.0977085	0.460829	NoDiff
Zm00001d003176	0.198364	0.741106	0.112751	0.867419	-0.0696182	0.926924	6.14905	NoDiff
Zm00001d003179	0.321965	0.509854	-0.248801	0.54932	-0.556559	0.0945943	0.0068876	NoDiff
Zm00001d003180	-0.0207194	0.981076	0.217754	0.674423	0.254451	0.639986	0.613133	NoDiff
Zm00001d003181	0.399231	0.760635	1.13154	0.0530255	0.750145	0.2936	2.43476	NoDiff
Zm00001d003182	0.903195	0.498527	-0.227157	0.849809	-1.10127	0.16797	0.488713	NoDiff
Zm00001d003183	0.933681	0.87739	-1.72961	0.189208	-2.65986	0.240004	-0.660017	NoDiff
Zm00001d003184	-1.44813	0.253556	4.36367	0.00293966	5.82529	2.64779e-05	-0.301934	AE
Zm00001d003190	-2.02122	0.391268	-1.3777	0.606284	0.665669	0.815499	-3.00911	NoDiff
Zm00001d003193	-0.657901	0.601586	-0.137058	0.894521	0.533606	0.597454	-1.36254	NoDiff
Zm00001d003195	0.997834	0.458398	0.614452	0.612622	-0.362108	0.787266	6.25281	NoDiff
Zm00001d003196	-0.359126	0.632562	-0.148952	0.808925	0.228522	0.763722	-1.99315	NoDiff
Zm00001d003197	-2.31508	0.443247	0.248515	0.932374	2.58002	0.281953	-0.919836	NoDiff
Zm00001d003198	0.115716	0.903258	-0.0805542	0.926266	-0.183107	0.794569	0.0427003	NoDiff
Zm00001d003199	8.40661	9.90335e-09	-0.352773	0.676876	-8.74035	5.52891e-10	0.576917	DHPE
Zm00001d003200	-1.71392	0.000569694	0.0413522	0.945144	1.76718	0.000221666	-0.971762	DLPE
Zm00001d003202	2.83325	0.231612	-1.74502	0.041832	-4.53598	0.000532086	-0.4605	AE
Zm00001d003203	0.240517	0.815099	-0.176316	0.817336	-0.405982	0.477215	0.0357809	NoDiff
Zm00001d003207	-0.0106667	0.990192	0.0458671	0.947022	0.0707419	0.906579	0.12491	NoDiff
Zm00001d003209	-4.37358	0.00606859	-2.30912	0.407762	2.0957	0.152796	-1.47518	DLPE
Zm00001d003210	-0.135189	0.928606	0.776865	0.143838	0.934003	0.139176	0.548409	NoDiff
Zm00001d003211	1.51928	0.10639	-1.31824	0.0146592	-2.81812	3.11975e-05	-0.392301	AE
Zm00001d003212	-0.738351	0.661877	0.458206	0.71331	1.21093	0.348314	-0.430291	NoDiff
Zm00001d003213	-0.0168888	0.989725	-0.287081	0.646702	-0.253639	0.775413	-1.35559	NoDiff
Zm00001d003214	0.370162	0.458717	0.772904	0.0353194	0.418496	0.33835	3.03741	NoDiff
Zm00001d003218	3.16954	0.742318	-4.08737	0.0019628	-7.2601	0.000108409	-0.883019	DLPE
Zm00001d003220	-0.132283	0.880885	-0.16603	0.784971	-0.021134	0.974431	-93.9351	NoDiff
Zm00001d003222	-0.231569	0.791099	0.213562	0.749272	0.460028	0.396084	-0.171779	NoDiff
Zm00001d003223	-0.176428	0.850609	0.0841585	0.886056	0.277095	0.658626	-0.414143	NoDiff
Zm00001d003224	-0.228333	0.773499	-0.471997	0.360196	-0.227704	0.745609	-3.0907	NoDiff
Zm00001d003227	0.834586	0.231579	0.596793	0.443465	-0.22626	0.822477	8.7238	NoDiff
Zm00001d003228	0.883276	0.374184	0.374658	0.717832	-0.491577	0.642558	3.18003	NoDiff
Zm00001d003239	-1.64866	0.63701	3.28196	0.457232	4.95289	0.0722122	-0.412663	NoDiff
Zm00001d003242	0.0445827	0.958636	-0.394485	0.36442	-0.424175	0.294072	-0.922104	NoDiff
Zm00001d003245	-0.125348	0.901929	-0.796395	0.063571	-0.659654	0.152027	-1.35579	NoDiff
Zm00001d003246	0.00303552	0.996731	-0.517249	0.155807	-0.505338	0.193279	-1.08267	NoDiff
Zm00001d003247	1.18734	0.0138199	-0.333605	0.659595	-1.50416	0.00581128	0.370744	AE
Zm00001d003248	-1.09824	0.00315941	0.308043	0.689898	1.42155	0.00564395	-0.71215	DLPE
Zm00001d003249	-0.068695	0.960555	0.513553	0.316276	0.592309	0.260861	0.629107	NoDiff
Zm00001d003250	0.0580339	0.960169	0.210324	0.641463	0.171057	0.800769	1.30553	NoDiff
Zm00001d003251	0.42888	0.613427	-0.636618	0.410233	-1.04735	0.169753	-0.384846	NoDiff
Zm00001d003252	0.798065	0.179312	-0.0891308	0.890231	-0.875057	0.104243	0.748298	NoDiff
Zm00001d003254	-0.170665	0.815099	0.0114471	0.985037	0.198077	0.707103	-0.839615	NoDiff
Zm00001d003256	-0.018179	0.986221	0.112602	0.793588	0.146403	0.813047	0.434538	NoDiff
Zm00001d003257	0.0844781	0.926452	0.194863	0.632251	0.123647	0.8253	1.89004	NoDiff
Zm00001d003258	0.188596	0.767309	0.422056	0.249125	0.24775	0.580336	2.39644	NoDiff
Zm00001d003259	-0.189141	0.823862	0.0576296	0.932791	0.259823	0.572646	-0.58948	NoDiff
Zm00001d003261	1.03957	0.062378	-0.184388	0.814781	-1.213	5.23379e-05	0.576485	DHPE
Zm00001d003262	-0.0469039	0.967185	-0.13521	0.879306	-0.0762517	0.93932	-3.44934	NoDiff
Zm00001d003264	-1.74289	0.00903392	-1.83809	0.0196316	-0.0731866	0.95379	-38.3184	TLPE
Zm00001d003265	-0.459469	0.411797	0.00937041	0.992091	0.488724	0.334831	-0.929542	NoDiff
Zm00001d003266	0.564956	0.368319	0.436991	0.337851	-0.115596	0.862995	12.124	NoDiff
Zm00001d003267	4.21406	3.44312e-35	0.114996	0.81605	-4.08305	4.47893e-35	1.18781	DHPE
Zm00001d003268	0.0838794	0.937265	-0.0122956	0.989411	-0.0768152	0.893609	1.01501	NoDiff
Zm00001d003271	-0.380874	0.713836	0.234839	0.827134	0.636294	0.49937	-0.352858	NoDiff
Zm00001d003272	-1.37775	0.374067	0.15883	0.940453	1.55736	0.181036	-0.86766	NoDiff
Zm00001d003274	0.281821	0.898425	0.0389156	0.980479	-0.222597	0.890118	1.51419	NoDiff
Zm00001d003275	0.696436	0.191187	-0.692251	0.115938	-1.37422	0.00182064	-0.240493	AE
Zm00001d003276	1.19368	0.653988	-0.257106	0.860549	-1.43356	0.494592	0.501246	NoDiff
Zm00001d003277	-0.288292	0.75846	-0.548398	0.615477	-0.247876	0.85432	-3.30746	NoDiff
Zm00001d003280	-0.119106	0.946594	-0.403388	0.768822	-0.274059	0.860518	-1.9913	NoDiff
Zm00001d003281	0.100474	0.968039	1.16744	0.38463	1.0878	0.477739	1.1937	NoDiff
Zm00001d003283	-5.61198	NA	2.12409	0.595157	7.76949	NA	-0.96881	NoDiff
Zm00001d003284	-0.377721	0.385939	-0.087913	0.855951	0.306529	0.491073	-1.42491	NoDiff
Zm00001d003288	-0.356803	0.493195	-0.496728	0.217306	-0.124329	0.823654	-7.0923	NoDiff
Zm00001d003289	8.82801	2.007e-08	-0.205273	0.863832	-9.01354	7.77704e-10	0.749782	DHPE
Zm00001d003290	-0.838459	0.269306	8.9975	7.5515e-11	9.85321	2.7474e-12	0.0966328	AE
Zm00001d003291	0.532968	0.225304	-0.351649	0.331605	-0.868263	0.00993218	0.0456544	NoDiff
Zm00001d003292	-0.142351	0.850989	0.161762	0.722149	0.320057	0.487002	-0.0599147	NoDiff
Zm00001d003294	-0.850598	0.235954	-0.366889	0.675228	0.497609	0.550941	-2.02932	NoDiff
Zm00001d003297	0.287031	0.893043	0.442551	0.716572	0.176639	0.902657	4.11316	NoDiff
Zm00001d003301	-2.38276	0.299371	-3.01373	0.119343	-0.624947	0.801687	-4.10733	NoDiff
Zm00001d003302	0.00183555	0.997527	0.389885	0.374306	0.403515	0.349628	0.857201	NoDiff
Zm00001d003303	-1.6075	0.0525936	4.05378	0.0185156	5.67438	1.82886e-05	-0.38223	AE
Zm00001d003304	2.84845	0.0597478	-2.89833	0.00025821	-5.72722	0.000355138	-0.762192	DLPE
Zm00001d003307	-1.02633	0.558235	6.58333	0.000267011	7.63036	5.48102e-05	-0.0395636	AE
Zm00001d003308	0.114164	0.88727	0.407296	0.324799	0.308669	0.56578	1.60752	NoDiff
Zm00001d003309	1.03562	0.0394188	0.415984	0.420522	-0.608417	0.139255	3.00645	NoDiff
Zm00001d003310	1.14066	0.262802	-0.214455	0.800261	-1.33487	0.0655015	0.568869	NoDiff
Zm00001d003311	-0.543297	0.782687	-2.57084	5.36466e-06	-2.00667	0.00658952	-1.22047	DLPE
Zm00001d003312	4.61741	0.000829809	-0.531319	0.58974	-5.12846	1.86252e-05	0.373216	AE
Zm00001d003313	-0.0779885	0.96251	-0.0265158	0.985249	0.0681339	0.95349	-1.42042	NoDiff
Zm00001d003314	0.70111	0.545544	0.0721584	0.936269	-0.608993	0.535655	1.35206	NoDiff
Zm00001d003315	1.81923	0.39687	0.481663	0.776601	-1.3147	0.593003	2.38197	NoDiff
Zm00001d003319	-0.266255	0.793837	0.676428	0.219317	0.957672	0.0729834	0.249397	NoDiff
Zm00001d003320	0.0362001	0.990764	-1.57517	0.047637	-1.59127	0.145035	-0.99246	NoDiff
Zm00001d003321	-0.228682	0.906633	-0.502478	0.582411	-0.25922	0.830202	-2.81068	NoDiff
Zm00001d003322	0.406053	0.488238	0.338138	0.429487	-0.0536541	0.935055	24.1442	NoDiff
Zm00001d003328	0.0252664	0.978318	0.45905	0.232005	0.447984	0.214428	0.99709	NoDiff
Zm00001d003329	0.269518	0.617998	0.271992	0.570211	0.0176184	0.974431	15.3821	NoDiff
Zm00001d003331	-0.719128	0.384139	-0.536421	0.318717	0.197972	0.837445	-4.83428	NoDiff
Zm00001d003332	0.435994	0.672926	-0.592859	0.434955	-1.01594	0.104527	-0.341046	NoDiff
Zm00001d003333	-0.14015	0.873001	-0.172092	0.707312	-0.0174968	0.978964	-406.678	NoDiff
Zm00001d003334	-0.124104	0.874131	-0.383312	0.377065	-0.244971	0.6635	-2.17134	NoDiff
Zm00001d003344	7.47919	1.79945e-06	-0.930714	0.110765	-8.3955	2.2235e-09	0.0505549	AE
Zm00001d003345	-0.21576	0.783399	-0.411492	0.346152	-0.176243	0.735404	-3.68648	NoDiff
Zm00001d003346	0.584072	0.740177	-1.69396	0.0326705	-2.25511	9.22512e-05	-0.744261	DLPE
Zm00001d003347	-0.211869	0.867552	-1.33784	0.00206728	-1.11651	0.0395027	-1.26561	DLPE
Zm00001d003349	-0.608759	0.293363	0.960526	0.121594	1.58713	0.00590018	-0.0655522	AE
Zm00001d003352	-0.304374	0.632605	-0.447126	0.236305	-0.127488	0.847732	-6.19497	NoDiff
Zm00001d003356	-3.31286	0.0943218	-0.143849	0.976718	3.18026	0.0854486	-1.02145	NoDiff
Zm00001d003359	9.2704	3.08106e-11	-0.0736913	0.93395	-9.32896	4.93883e-12	0.906561	DHPE
Zm00001d003367	-1.45649	0.0210727	5.89637	3.13984e-05	7.36636	1.26265e-08	-0.292308	AE
Zm00001d003368	0.552317	0.461183	2.38764	7.23604e-05	1.84667	0.00734137	2.20939	THPE
Zm00001d003369	-0.166517	0.834485	0.2506	0.596818	0.429981	0.382912	0.0662259	NoDiff
Zm00001d003372	0.598979	0.497073	-0.374838	0.578008	-0.963711	0.0377595	0.0504782	NoDiff
Zm00001d003373	0.410875	0.525561	-0.24651	0.669623	-0.641724	0.21179	0.130032	NoDiff
Zm00001d003376	-0.608966	0.312981	0.692598	0.295596	1.31928	0.0143706	-0.184435	AE
Zm00001d003378	0.624106	0.198984	0.201734	0.702982	-0.405265	0.451179	2.31631	NoDiff
Zm00001d003379	0.309562	0.848931	-0.358447	0.656835	-0.650282	0.492431	-0.20298	NoDiff
Zm00001d003380	1.01296	0.0244361	0.888669	0.0150725	-0.113473	0.847634	28.1271	NoDiff
Zm00001d003381	0.804076	0.540288	0.321374	0.74286	-0.457498	0.705638	3.01175	NoDiff
Zm00001d003382	-0.0983942	0.927527	0.7478	0.0739488	0.861266	0.0045977	0.625189	NoDiff
Zm00001d003386	-1.03949	0.042662	0.335374	0.602476	1.39509	0.000197244	-0.673699	DLPE
Zm00001d003390	0.0907743	0.948	0.497542	0.416302	0.423691	0.592691	1.34234	NoDiff
Zm00001d003392	0.20549	0.90367	-0.168756	0.86303	-0.354979	0.755951	-0.0116169	NoDiff
Zm00001d003393	-0.0170522	0.983774	-0.216127	0.624533	-0.184105	0.69882	-1.4848	NoDiff
Zm00001d003394	-0.382108	0.462053	-0.452865	0.149883	-0.0572874	0.926267	-19.3152	NoDiff
Zm00001d003395	-1.12931	0.0181077	-1.47425	0.00191743	-0.328688	0.702629	-5.59206	TLPE
Zm00001d003398	0.643128	0.128687	-0.0565616	0.935967	-0.684613	0.154385	0.819984	NoDiff
Zm00001d003399	-0.102688	0.964446	0.431755	0.687174	0.554414	0.574379	0.495612	NoDiff
Zm00001d003400	0.173301	0.938629	1.25043	0.0390536	1.10324	0.328484	1.37769	NoDiff
Zm00001d003401	0.516822	0.347642	-0.153714	0.792766	-0.659349	0.0911146	0.453453	NoDiff
Zm00001d003404	0.0407195	0.986462	2.2543	0.0951234	2.24059	0.147679	1.01962	NoDiff
Zm00001d003406	1.46037	1.69407e-05	-0.0467548	0.945155	-1.48845	6.19172e-05	0.919865	DHPE
Zm00001d003408	-1.6389	0.394332	0.0745114	0.984185	1.73648	0.293823	-0.94605	NoDiff
Zm00001d003409	-0.316666	0.82473	0.834221	0.366105	1.16203	0.19191	0.24355	NoDiff
Zm00001d003411	0.770802	0.25401	0.51093	0.366422	-0.243598	0.772854	7.01666	NoDiff
Zm00001d003415	0.269034	0.60984	-0.257598	0.490544	-0.509603	0.147113	-0.100181	NoDiff
Zm00001d003420	-1.40903	0.449901	1.42408	0.575755	2.85665	0.123054	-0.461386	NoDiff
Zm00001d003422	0.577538	0.741106	0.0164183	0.994098	-0.539325	0.690434	1.14907	NoDiff
Zm00001d003423	0.108237	0.907412	0.986089	0.00645088	0.892517	0.0196905	1.2483	NoDiff
Zm00001d003425	1.07481	0.60984	-0.0507203	0.980698	-1.10283	0.445114	0.924779	NoDiff
Zm00001d003426	0.180284	0.846207	0.0833976	0.900394	-0.0797894	0.914517	4.13484	NoDiff
Zm00001d003427	0.0126082	0.991235	-0.171808	0.81824	-0.171766	0.805272	-1.17756	NoDiff
Zm00001d003428	-0.710645	0.100638	-0.736478	0.0762659	-0.00905343	0.989371	-106.921	NoDiff
Zm00001d003429	-0.120669	0.936273	1.06476	0.0486574	1.20075	0.033147	0.670173	DHPE
Zm00001d003430	-0.436267	0.519462	-0.0660435	0.924191	0.384735	0.542353	-1.24821	NoDiff
Zm00001d003432	-0.475511	0.745197	-0.892338	0.226719	-0.401703	0.652497	-2.93534	NoDiff
Zm00001d003434	-0.153258	0.898853	-0.0469574	0.962508	0.1248	0.86695	-1.46829	NoDiff
Zm00001d003435	0.474162	0.676365	-0.131405	0.871849	-0.582956	0.477662	0.505922	NoDiff
Zm00001d003438	-0.19885	0.717434	0.500842	0.193045	0.715171	0.0630393	0.272331	NoDiff
Zm00001d003445	10.5029	3.23032e-27	-0.326083	0.666637	-10.8162	4.97526e-28	0.599791	DHPE
Zm00001d003446	-0.794177	0.0759967	-0.265786	0.666325	0.548307	0.179787	-1.66791	NoDiff
Zm00001d003448	0.0100221	0.992466	-0.11522	0.855556	-0.107185	0.892364	-1.41757	NoDiff
Zm00001d003451	-0.315276	0.807487	0.401717	0.671803	0.728535	0.482929	-0.0315102	NoDiff
Zm00001d003457	0.0882053	0.954585	-1.42861	0.0390346	-1.49693	0.0124824	-0.952216	DLPE
Zm00001d003459	0.502609	0.593904	0.810454	0.162794	0.323386	0.764986	4.66578	NoDiff
Zm00001d003460	-0.23271	0.748765	-0.144523	0.811618	0.104218	0.883942	-3.02939	NoDiff
Zm00001d003462	0.0346568	0.966197	-0.385004	0.256775	-0.403559	0.246656	-0.964078	NoDiff
Zm00001d003464	-0.00593123	0.993849	-0.564156	0.0517179	-0.544346	0.0590161	-1.10202	NoDiff
Zm00001d003468	-0.163006	0.819224	-0.0248015	0.967911	0.155503	0.771149	-1.17042	NoDiff
Zm00001d003469	1.15887	0.118943	0.312337	0.654836	-0.828686	0.322787	2.16347	NoDiff
Zm00001d003470	0.17594	0.837357	-1.26855	0.000134128	-1.42908	6.55599e-06	-0.867813	DLPE
Zm00001d003471	3.39543	1.28818e-05	-0.451342	0.605014	-3.83221	7.6128e-09	0.435921	AE
Zm00001d003472	-0.298217	0.668771	0.12182	0.863627	0.439083	0.501113	-0.494166	NoDiff
Zm00001d003476	-0.161266	0.815342	-0.167099	0.712765	0.0105043	0.985757	-11.1745	NoDiff
Zm00001d003477	1.26881	0.0105086	0.929766	0.136348	-0.324328	0.755329	10.5916	THPE
Zm00001d003488	1.21995	0.385	0.647816	0.644413	-0.554308	0.788211	4.74801	NoDiff
Zm00001d003491	-0.270269	0.781016	0.128044	0.874302	0.413649	0.575465	-0.444217	NoDiff
Zm00001d003492	-1.43082	0.112868	0.22524	0.827317	1.67532	0.0286321	-0.840011	DLPE
Zm00001d003493	0.236838	0.873766	0.447526	0.461684	0.22165	0.83026	3.10887	NoDiff
Zm00001d003494	-4.08503	0.0120715	0.0671821	0.992613	4.21197	0.00724535	-0.99378	DLPE
Zm00001d003495	-0.879468	0.115318	-0.472246	0.372351	0.42712	0.496759	-2.51097	NoDiff
Zm00001d003497	-0.755582	0.446763	-0.288468	0.716546	0.485892	0.566425	-1.82688	NoDiff
Zm00001d003499	0.236814	0.930534	0.276386	0.823434	0.0559179	0.974431	7.18679	NoDiff
Zm00001d003500	-0.214057	0.773424	-0.0782094	0.886056	0.152394	0.79855	-1.73606	NoDiff
Zm00001d003501	2.52716	0.0238361	-1.23378	0.135046	-3.73518	7.76631e-07	-0.232426	AE
Zm00001d003502	0.611217	0.191187	-0.390256	0.379345	-0.983343	0.00133866	0.0514239	NoDiff
Zm00001d003504	-0.405087	0.754329	-0.456363	0.451371	-0.0385935	0.97465	-40.4336	NoDiff
Zm00001d003508	0.0262569	0.986566	1.22703	0.00613937	1.22264	0.0659306	0.986062	NoDiff
Zm00001d003509	0.0888818	0.924834	-0.0922886	0.849263	-0.164379	0.774447	-0.172526	NoDiff
Zm00001d003511	0.0959445	0.95209	0.194851	0.814432	0.123091	0.893434	1.99919	NoDiff
Zm00001d003512	-0.0857631	0.906719	0.1221	0.843696	0.223616	0.708302	0.0227648	NoDiff
Zm00001d003513	0.786213	0.606138	0.704296	0.423066	-0.0656016	0.971779	38.7951	NoDiff
Zm00001d003516	8.66772	1.04994e-09	-0.443208	0.534818	-9.09458	5.35051e-11	0.476239	AE
Zm00001d003518	-0.0186692	0.982183	-0.211576	0.651434	-0.17794	0.693117	-1.55342	NoDiff
Zm00001d003522	0.807326	0.439531	-0.932553	0.198416	-1.72687	0.0089907	-0.364149	AE
Zm00001d003525	0.0621127	0.948423	0.37776	0.364424	0.332566	0.527314	1.21058	NoDiff
Zm00001d003533	-1.24669	0.0304181	0.435653	0.572526	1.69749	0.00129689	-0.682612	DLPE
Zm00001d003534	-0.727893	0.245605	0.0246023	0.983158	0.765941	0.200519	-0.941345	NoDiff
Zm00001d003538	-0.375876	0.880885	0.291365	0.836642	0.684498	0.637283	-0.247283	NoDiff
Zm00001d003539	-0.234714	0.66237	-0.239049	0.53233	0.0129823	0.979575	-13.8194	NoDiff
Zm00001d003540	0.309344	0.713469	0.218625	0.725054	-0.0720936	0.932715	10.6229	NoDiff
Zm00001d003543	0.056683	0.976795	0.0125956	0.992613	-0.0297632	0.978663	3.86113	NoDiff
Zm00001d003545	-1.43399	0.46204	-1.79732	0.13578	-0.343667	0.831874	-6.0516	NoDiff
Zm00001d003546	0.225497	0.749961	-0.211107	0.672285	-0.421118	0.349455	-0.0819238	NoDiff
Zm00001d003549	0.348288	0.803699	-0.25853	0.74221	-0.58694	0.478475	0.0334394	NoDiff
Zm00001d003552	-0.00938336	0.995251	0.125844	0.899153	0.158179	0.808298	0.573628	NoDiff
Zm00001d003556	-0.119044	0.881866	-0.392495	0.328926	-0.258834	0.604427	-2.06815	NoDiff
Zm00001d003559	1.35013	0.0611376	1.09761	0.0677157	-0.236062	0.86428	17.5754	THPE
Zm00001d003566	-0.235218	0.742318	-0.0785882	0.899353	0.175732	0.720981	-1.63353	NoDiff
Zm00001d003572	-0.444673	0.522641	-0.052786	0.936387	0.406907	0.481171	-1.18865	NoDiff
Zm00001d003573	1.10372	0.692786	2.27261	0.175923	1.20148	0.758705	4.88475	NoDiff
Zm00001d003575	0.238905	0.948775	1.46486	0.470429	1.24994	0.676669	1.54431	NoDiff
Zm00001d003581	6.92162	4.39886e-19	0.326492	0.732288	-6.58227	1.13123e-13	1.53514	DHPE
Zm00001d003584	-0.672115	0.675106	0.745973	0.400614	1.44636	0.184659	-0.21466	NoDiff
Zm00001d003588	-0.208824	0.834224	-0.24429	0.757363	-0.0218773	0.979279	-172.573	NoDiff
Zm00001d003589	0.0704108	0.944607	0.238967	0.682634	0.187488	0.762452	1.43877	NoDiff
Zm00001d003590	-0.167892	0.748634	0.107299	0.821577	0.29045	0.447485	-0.308837	NoDiff
Zm00001d003592	0.626472	0.716945	0.149652	0.911084	-0.464535	0.764845	1.87534	NoDiff
Zm00001d003593	-1.75417	0.0376644	0.168475	0.917855	1.93941	0.00866404	-0.90775	DLPE
Zm00001d003598	-0.22858	0.856311	-0.640348	0.444834	-0.395533	0.697834	-2.10917	NoDiff
Zm00001d003601	0.468505	0.555967	0.584508	0.201931	0.128046	0.858491	8.4609	NoDiff
Zm00001d003602	0.569922	0.0616561	-0.337475	0.332995	-0.891325	0.0024124	0.0988782	NoDiff
Zm00001d003603	-0.196076	0.900322	-0.543167	0.578772	-0.330212	0.69066	-2.18611	NoDiff
Zm00001d003606	0.495952	0.550215	1.55085	0.000445564	1.06911	0.0821167	2.44666	NoDiff
Zm00001d003607	0.685687	0.350305	0.905952	0.0486876	0.23761	0.79045	8.0293	NoDiff
Zm00001d003611	0.0763023	0.922732	0.0409354	0.934297	-0.0189126	0.972352	201.34	NoDiff
Zm00001d003612	0.455652	0.706118	-0.398039	0.616952	-0.846081	0.215943	-0.101697	NoDiff
Zm00001d003613	0.44419	0.416604	-0.264253	0.585246	-0.689561	0.0533165	0.133296	NoDiff
Zm00001d003615	0.0676256	0.963437	0.350949	0.707144	0.292941	0.780832	1.30876	NoDiff
Zm00001d003616	0.205862	0.751798	-0.0848121	0.885495	-0.271812	0.546247	0.374713	NoDiff
Zm00001d003617	-0.253855	0.745625	0.128529	0.886357	0.398942	0.590584	-0.403573	NoDiff
Zm00001d003618	0.397775	0.629064	0.0605593	0.930234	-0.316684	0.629847	1.54615	NoDiff
Zm00001d003620	-1.46515	0.0108649	3.24587	2.77169e-19	4.72837	1.40358e-23	-0.340137	AE
Zm00001d003621	-0.412084	0.303915	0.165596	0.710376	0.593045	0.0215993	-0.520587	NoDiff
Zm00001d003624	1.65162	0.230268	0.444001	0.76348	-1.18384	0.3955	2.35119	NoDiff
Zm00001d003630	0.113692	0.90813	-0.663831	0.0746867	-0.759165	0.0207029	-0.815651	NoDiff
Zm00001d003631	0.104449	0.977938	2.66279	0.293877	2.58668	0.375144	1.13146	NoDiff
Zm00001d003632	-0.238623	0.737085	1.81463	3.53952e-09	2.07146	3.89848e-10	0.560446	DHPE
Zm00001d003638	2.43913	5.25601e-05	0.0221268	0.986425	-2.40185	0.000410114	1.05035	DHPE
Zm00001d003639	-1.53814	0.0275812	-0.0430776	0.973214	1.50717	0.0423126	-1.02594	DLPE
Zm00001d003643	-0.500195	0.271179	-0.748024	0.0206147	-0.234067	0.676348	-4.80449	NoDiff
Zm00001d003644	0.5075	0.54894	1.05558	0.0484482	0.557684	0.174396	3.38901	NoDiff
Zm00001d003645	0.00481767	0.99765	-0.374667	0.715161	-0.362344	0.795381	-1.1181	NoDiff
Zm00001d003646	-0.0345063	0.97538	0.760107	0.0745353	0.81227	0.0681216	0.799798	NoDiff
Zm00001d003648	-0.300296	0.855559	-0.595442	0.586675	-0.289053	0.808649	-2.97898	NoDiff
Zm00001d003649	0.35779	0.704114	-0.185563	0.874217	-0.530056	0.563292	0.208823	NoDiff
Zm00001d003650	-0.117712	0.958636	1.07964	0.319667	1.21796	0.279501	0.668334	NoDiff
Zm00001d003652	-0.273931	0.764289	-0.140975	0.874449	0.153377	0.868466	-2.3359	NoDiff
Zm00001d003653	-0.544617	0.281834	-0.30671	0.550049	0.255294	0.524191	-2.75871	NoDiff
Zm00001d003654	-0.16983	0.841917	-0.00364724	0.996121	0.18097	0.766072	-0.964845	NoDiff
Zm00001d003655	0.0919217	0.95209	0.244185	0.790706	0.162241	0.851464	1.77681	NoDiff
Zm00001d003658	-0.443882	0.674449	-0.584203	0.426097	-0.120474	0.90927	-8.67064	NoDiff
Zm00001d003659	0.0235351	0.982473	0.338098	0.502209	0.326399	0.428146	0.976878	NoDiff
Zm00001d003660	-0.258507	0.929524	-0.284566	0.832942	-0.00337888	0.999072	-28.1988	NoDiff
Zm00001d003663	-0.126484	0.889989	-0.815497	0.0254284	-0.671727	0.0377879	-1.35012	NoDiff
Zm00001d003664	-0.48598	0.156399	-0.03059	0.957263	0.471465	0.160117	-1.0759	NoDiff
Zm00001d003667	-1.04723	0.177688	-0.393889	0.668185	0.670986	0.352975	-1.75693	NoDiff
Zm00001d003668	0.942629	0.400967	0.302008	0.811986	-0.623121	0.600373	2.42654	NoDiff
Zm00001d003669	-3.26665	0.194503	-2.48404	0.0534181	0.789064	0.785778	-3.17556	NoDiff
Zm00001d003670	-0.535016	0.420393	0.00442287	0.99638	0.55221	0.360564	-0.969755	NoDiff
Zm00001d003671	-0.354951	0.696501	0.919588	0.13254	1.28893	0.050955	0.223391	NoDiff
Zm00001d003672	-0.36521	0.502515	-0.670148	0.0207339	-0.290523	0.552854	-3.28213	NoDiff
Zm00001d003673	0.546781	0.155143	0.151221	0.793255	-0.381661	0.368294	2.03588	NoDiff
Zm00001d003674	-0.304438	0.740298	0.0529007	0.955835	0.374721	0.568067	-0.728859	NoDiff
Zm00001d003675	0.617655	0.658533	0.358546	0.726579	-0.247463	0.8262	4.87304	NoDiff
Zm00001d003678	0.116959	0.886112	0.427794	0.347072	0.328094	0.507877	1.58889	NoDiff
Zm00001d003679	0.125014	0.85678	0.25846	0.643086	0.149673	0.816841	2.23747	NoDiff
Zm00001d003680	-0.18683	0.825306	-0.307052	0.438944	-0.107319	0.874612	-5.27543	NoDiff
Zm00001d003683	-0.18187	0.763832	-0.167588	0.636205	0.0302623	0.95611	-7.0259	NoDiff
Zm00001d003684	-0.462465	0.533106	0.47391	0.435508	0.948434	0.0671787	-0.173301	NoDiff
Zm00001d003685	0.23054	0.800213	0.13554	0.829208	-0.0841653	0.897732	5.6055	NoDiff
Zm00001d003690	-0.704421	0.17768	2.40966	0.000531741	3.12949	4.96992e-06	0.101691	AE
Zm00001d003709	-0.15048	0.933294	1.13527	0.074876	1.31086	0.0373031	0.609177	DHPE
Zm00001d003710	0.72798	0.0812191	0.478375	0.238634	-0.232371	0.698513	6.83008	NoDiff
Zm00001d003712	-3.84529	0.117031	3.76028	0.0162528	7.64156	0.00129162	-0.871757	DLPE
Zm00001d003713	0.353513	0.557495	0.211188	0.662047	-0.128952	0.825514	5.43913	NoDiff
Zm00001d003715	0.855448	0.148258	0.309306	0.688562	-0.527045	0.4579	2.6824	NoDiff
Zm00001d003718	-0.340253	0.761376	0.479577	0.616524	0.840725	0.386951	-0.00982934	NoDiff
Zm00001d003724	-1.30066	0.0451807	7.39721	5.83503e-07	8.71754	4.94888e-10	-0.206605	AE
Zm00001d003725	-0.74592	0.501602	0.0790964	0.87039	0.838328	0.338988	-0.846396	NoDiff
Zm00001d003729	-0.034072	0.971898	-0.595079	0.14371	-0.546702	0.203544	-1.18647	NoDiff
Zm00001d003730	-0.416693	0.694412	0.152577	0.84609	0.577423	0.363535	-0.558718	NoDiff
Zm00001d003742	0.11584	0.963188	-0.302239	0.714875	-0.394432	0.787311	-0.603547	NoDiff
Zm00001d003743	2.79134	0.0886465	0.0933263	0.971762	-2.66183	0.00665796	1.20127	DHPE
Zm00001d003749	1.92598	0.15296	-0.0159076	0.992812	-1.93428	0.126891	0.976975	NoDiff
Zm00001d003750	-0.468273	0.743074	1.02452	0.0324743	1.50027	0.0485447	0.111145	AE
Zm00001d003751	-1.01526	0.348479	1.38687	0.255166	2.41732	0.0133285	-0.255101	AE
Zm00001d003754	-0.0130078	0.991145	-0.710941	0.203746	-0.679475	0.304369	-1.10255	NoDiff
Zm00001d003755	7.2614	3.73886e-12	-0.483904	0.432188	-7.72854	9.16216e-14	0.433846	AE
Zm00001d003756	0.459875	0.669582	-1.38623	0.00762995	-1.8282	0.000513486	-0.721219	DLPE
Zm00001d003757	0.83594	0.356625	-0.779743	0.194637	-1.59157	0.0031501	-0.240016	AE
Zm00001d003760	-0.0229672	0.992252	0.572326	0.677677	0.606938	0.687535	0.817203	NoDiff
Zm00001d003761	0.879787	0.86135	2.66955	0.408005	1.83613	0.748086	3.22637	NoDiff
Zm00001d003765	0.0942923	0.958436	-0.485496	0.560543	-0.564726	0.401912	-0.802996	NoDiff
Zm00001d003767	0.958583	0.286191	0.77176	0.289273	-0.172732	0.899311	15.4829	NoDiff
Zm00001d003770	-0.298811	0.591862	-0.454974	0.238235	-0.141711	0.799323	-5.56757	NoDiff
Zm00001d003773	0.258705	0.695535	0.235933	0.524269	-0.00511622	0.994153	35.3077	NoDiff
Zm00001d003774	0.47643	0.507265	-0.00751864	0.99389	-0.467594	0.464805	0.993619	NoDiff
Zm00001d003775	1.57148	0.231074	0.0233264	0.982693	-1.52567	0.174712	1.08121	NoDiff
Zm00001d003778	-0.171678	0.871616	-0.933678	0.0219647	-0.746207	0.157614	-1.39145	NoDiff
Zm00001d003779	-0.153772	0.928404	0.527712	0.308128	0.690222	0.374823	0.400013	NoDiff
Zm00001d003780	-0.0860546	0.974617	-0.49195	0.770912	-0.383654	0.816073	-1.51903	NoDiff
Zm00001d003781	0.708564	0.368275	2.10023	0.00380624	1.41069	0.169869	2.9227	THPE
Zm00001d003784	-2.28709	0.0374841	0.557465	0.479384	2.85638	0.00313006	-0.847356	DLPE
Zm00001d003785	-1.28138	0.0581396	6.07405	0.000287621	7.37036	8.23762e-07	-0.198968	AE
Zm00001d003786	-0.213016	0.819606	0.285807	0.609097	0.515983	0.393817	0.00174865	NoDiff
Zm00001d003790	1.14459	0.0468018	0.657168	0.259753	-0.471859	0.428851	5.30792	NoDiff
Zm00001d003793	-0.203699	0.86834	0.856121	0.0565708	1.07937	0.0576395	0.437808	NoDiff
Zm00001d003794	-0.409538	0.512693	0.225362	0.752886	0.650586	0.234331	-0.411812	NoDiff
Zm00001d003796	0.100793	0.933294	-0.315701	0.572557	-0.396143	0.49639	-0.656457	NoDiff
Zm00001d003797	-0.448505	0.69171	-0.00633755	0.9957	0.455954	0.630133	-0.99469	NoDiff
Zm00001d003800	0.0047415	0.995832	0.90829	0.043552	0.917811	0.0428927	0.937566	NoDiff
Zm00001d003806	1.98244	0.140801	-1.08097	0.385084	-3.04942	0.00817733	-0.198627	AE
Zm00001d003807	0.169557	0.802195	-0.361578	0.450734	-0.516542	0.240229	-0.496057	NoDiff
Zm00001d003811	-0.882998	0.523603	-1.30809	0.0200606	-0.402316	0.758705	-4.09164	NoDiff
Zm00001d003812	-0.482948	0.439531	0.331352	0.514591	0.830434	0.0657375	-0.34664	NoDiff
Zm00001d003813	0.125458	0.873519	0.271221	0.491136	0.160553	0.749394	2.21726	NoDiff
Zm00001d003814	-1.08832	0.390734	7.12485	3.1104e-05	8.2286	3.70429e-07	-0.0774501	AE
Zm00001d003817	0.232658	0.832521	-0.0191018	0.987362	-0.241659	0.691579	0.811772	NoDiff
Zm00001d003822	0.476993	0.385272	-1.15388	0.000367023	-1.61632	6.8055e-06	-0.637058	DLPE
Zm00001d003823	-0.833478	0.833527	0.0174864	0.9971	0.868149	0.771897	-0.936317	NoDiff
Zm00001d003829	-1.14602	0.432577	0.44565	0.760957	1.61284	0.115872	-0.639737	NoDiff
Zm00001d003830	-1.18182	0.052187	1.36699	0.144458	2.56724	0.000197674	-0.359271	AE
Zm00001d003833	-0.160206	0.948538	0.139104	0.90106	0.31895	0.826203	-0.150599	NoDiff
Zm00001d003835	-0.926859	0.403649	8.46533	3.27181e-09	9.41	6.13779e-10	0.0331088	AE
Zm00001d003836	-0.16262	0.787604	-0.217305	0.597731	-0.0387643	0.938434	-19.1088	NoDiff
Zm00001d003839	0.351838	0.469999	-0.259999	0.56993	-0.594807	0.0765172	0.0304737	NoDiff
Zm00001d003840	1.01454	0.435824	0.724389	0.523206	-0.265983	0.819685	9.66305	NoDiff
Zm00001d003841	0.405103	0.930431	5.98628	0.00836547	5.60193	0.143072	1.60405	NoDiff
Zm00001d003846	-0.942483	0.00854583	1.18664	0.000354559	2.14744	2.4071e-09	-0.261028	AE
Zm00001d003847	0.604034	0.109696	0.151977	0.813139	-0.438045	0.363339	1.9192	NoDiff
Zm00001d003848	0.234917	0.725566	-0.130737	0.841966	-0.351468	0.480258	0.202726	NoDiff
Zm00001d003850	-0.158797	0.940462	-0.557555	0.599373	-0.376361	0.733767	-1.86682	NoDiff
Zm00001d003851	0.325609	0.606488	-0.190009	0.711363	-0.500893	0.250279	0.152469	NoDiff
Zm00001d003852	-0.80556	0.517965	1.01944	0.321599	1.85083	0.00838759	-0.208206	AE
Zm00001d003855	-0.740901	0.190713	-0.580155	0.242129	0.178204	0.822718	-5.46393	NoDiff
Zm00001d003857	-0.448538	0.364358	-0.272346	0.416104	0.189774	0.725142	-3.16987	NoDiff
Zm00001d003861	-3.61623	1.09789e-10	-1.88222	0.00258804	1.7477	0.015121	-1.60743	DLPE
Zm00001d003864	-0.207907	0.703874	0.0218566	0.97595	0.245992	0.611524	-0.791941	NoDiff
Zm00001d003872	-0.990607	0.000660607	7.28146	5.74052e-29	8.28747	1.72503e-37	-0.0154857	AE
Zm00001d003875	-0.95545	0.271491	8.02079	1.63621e-10	8.9845	1.00783e-13	0.0116121	AE
Zm00001d003878	0.145781	0.839505	-0.118459	0.809562	-0.250019	0.559086	-0.0153331	NoDiff
Zm00001d003879	-0.00593805	0.993526	-0.338685	0.239849	-0.315902	0.386815	-1.21066	NoDiff
Zm00001d003884	-0.874243	0.64211	-1.61932	0.0849048	-0.717564	0.534057	-2.49638	NoDiff
Zm00001d003888	-0.229176	0.8864	-0.711062	0.107892	-0.462083	0.616139	-1.90119	NoDiff
Zm00001d003889	0.43904	0.643477	-0.0168958	0.989588	-0.441365	0.649952	0.956501	NoDiff
Zm00001d003890	-0.37038	0.43611	-0.0756337	0.907971	0.310194	0.557977	-1.35776	NoDiff
Zm00001d003894	-0.662643	0.153946	-0.0253035	0.975944	0.650728	0.146662	-1.04637	NoDiff
Zm00001d003895	0.588019	0.0412187	0.693204	0.0767954	0.119805	0.848696	11.3399	NoDiff
Zm00001d003896	-0.217473	0.756288	-0.00786961	0.992868	0.228309	0.62298	-0.972752	NoDiff
Zm00001d003897	-0.143928	0.939599	0.836257	0.321973	1.00619	0.261744	0.553755	NoDiff
Zm00001d003902	-0.187021	0.77691	-0.0313149	0.963693	0.170147	0.72687	-1.2502	NoDiff
Zm00001d003904	-0.181683	0.852239	0.223114	0.713473	0.426188	0.329683	-0.0174134	NoDiff
Zm00001d003905	-0.0129509	0.993169	-0.152478	0.812401	-0.121583	0.911491	-1.78308	NoDiff
Zm00001d003911	-0.172185	0.822761	0.353853	0.294337	0.544476	0.168736	0.191564	NoDiff
Zm00001d003912	7.87091	4.39448e-06	-0.0787671	0.963161	-7.93029	2.40724e-06	0.912134	DHPE
Zm00001d003913	0.435633	0.530507	-0.314726	0.484686	-0.736888	0.136855	0.0189443	NoDiff
Zm00001d003917	-0.282415	0.636569	-0.390611	0.366422	-0.0925389	0.89151	-8.33478	NoDiff
Zm00001d003922	-0.057421	0.933936	-0.243362	0.587198	-0.170573	0.731791	-2.03547	NoDiff
Zm00001d003923	-0.52827	0.35273	-0.55052	0.254301	-0.00998868	0.990492	-103.481	NoDiff
Zm00001d003924	-3.1662	0.000445129	-0.578772	0.614199	2.60302	0.00344337	-1.12441	DLPE
Zm00001d003925	-0.23765	0.737312	-0.00367664	0.996826	0.248901	0.712714	-0.975501	NoDiff
Zm00001d003927	-1.07923	0.432554	-0.6938	0.514582	0.402358	0.781801	-3.19729	NoDiff
Zm00001d003928	-0.0122496	0.989127	-0.759033	0.0388128	-0.729822	0.0580201	-1.08429	NoDiff
Zm00001d003929	5.28869	0.0226234	-1.39099	0.134267	-6.66366	7.54905e-05	-0.244815	AE
Zm00001d003930	0.202786	0.965374	1.04921	0.533336	0.873815	0.726221	1.56036	NoDiff
Zm00001d003931	0.486692	0.787417	-1.26049	0.0323757	-1.72274	0.0356605	-0.671075	DLPE
Zm00001d003935	-0.462676	0.18876	-0.0672577	0.903937	0.411747	0.279612	-1.23025	NoDiff
Zm00001d003937	0.539488	0.533654	0.654705	0.359084	0.126593	0.887745	9.86664	NoDiff
Zm00001d003939	-1.50574	0.00468699	4.23247	2.13342e-26	5.75328	2.80386e-28	-0.334361	AE
Zm00001d003941	0.849426	0.0769184	0.666186	0.0407145	-0.166601	0.805542	13.2095	NoDiff
Zm00001d003945	0.975061	0.0302215	1.01886	0.000112716	0.0636893	0.930568	34.2097	NoDiff
Zm00001d003947	0.759886	0.10639	0.690156	0.0706131	-0.0578914	0.934353	48.1562	NoDiff
Zm00001d003948	-0.394954	0.501554	0.938171	5.51684e-05	1.35187	0.000137434	0.167642	AE
Zm00001d003949	0.84205	0.129749	0.231707	0.777823	-0.594627	0.452635	2.10108	NoDiff
Zm00001d003950	0.136741	0.925833	1.01035	0.00391774	0.891994	0.167393	1.32591	NoDiff
Zm00001d003957	0.0843771	0.942189	-0.00826264	0.992613	-0.0735372	0.926688	1.06563	NoDiff
Zm00001d003958	0.189702	0.860629	-0.0883888	0.917855	-0.266444	0.598704	0.260764	NoDiff
Zm00001d003962	0.288588	0.823263	0.92288	0.0834503	0.653524	0.346506	2.07058	NoDiff
Zm00001d003967	-1.17276	0.351961	4.10408	0.0476209	5.28942	0.00209156	-0.157584	AE
Zm00001d003969	-1.04183	0.166689	7.61896	1.00004e-06	8.67586	3.05584e-09	-0.047434	AE
Zm00001d003973	1.94828	0.822285	-0.140198	0.981851	-2.07808	0.790827	0.77293	NoDiff
Zm00001d003974	-0.034172	0.983467	-0.73567	0.189009	-0.693458	0.246656	-1.13427	NoDiff
Zm00001d003975	-0.0156236	0.992152	-0.00346263	0.997453	0.0309929	0.975546	-0.649862	NoDiff
Zm00001d003978	1.04715	0.0171744	0.287672	0.692047	-0.742865	0.239683	2.14922	NoDiff
Zm00001d003981	-0.551493	0.866731	-1.69115	0.254338	-1.11876	0.423001	-1.57499	NoDiff
Zm00001d003982	4.738	5.73243e-19	-0.370975	0.416104	-5.08892	4.98061e-24	0.543432	DHPE
Zm00001d003983	-0.947582	0.00438687	4.00329	5.02029e-23	4.96584	5.18499e-34	-0.0156476	AE
Zm00001d003984	0.104996	0.936664	-0.355781	0.60615	-0.450142	0.453928	-0.680422	NoDiff
Zm00001d003993	-1.1712	0.574821	-1.10313	0.443321	0.0912135	0.967047	-13.9322	NoDiff
Zm00001d003996	0.29185	0.642356	-0.123492	0.841517	-0.39784	0.370717	0.335493	NoDiff
Zm00001d003999	-0.975383	0.129743	-1.26227	9.38427e-05	-0.273334	0.712425	-6.19073	TLPE
Zm00001d004004	0.209713	0.874193	0.790321	0.187973	0.602379	0.347484	1.76114	NoDiff
Zm00001d004006	-0.616254	0.254896	-1.80282	0.000194329	-1.17482	0.0560195	-1.5851	NoDiff
Zm00001d004008	8.42905	4.26472e-08	-0.0494224	0.967911	-8.46082	2.90911e-08	0.943875	DHPE
Zm00001d004009	-0.459078	0.301736	-0.393759	0.193523	0.0808564	0.886823	-7.57139	NoDiff
Zm00001d004012	0.280066	0.771383	-0.160711	0.811342	-0.429726	0.466009	0.168965	NoDiff
Zm00001d004013	-0.0675079	0.977398	2.31945	0.200103	2.41388	0.21375	0.84266	NoDiff
Zm00001d004018	1.38485	0.283472	0.0245105	0.988485	-1.34252	0.191427	1.08659	NoDiff
Zm00001d004019	-0.262723	0.741601	-0.337737	0.443321	-0.0552772	0.934382	-15.5323	NoDiff
Zm00001d004020	-0.0352876	0.977612	0.328008	0.631372	0.375386	0.467959	0.638063	NoDiff
Zm00001d004021	-0.0504692	0.971904	-0.0524744	0.965263	0.0194473	0.984588	-3.01461	NoDiff
Zm00001d004022	-1.6791	2.72608e-05	-0.89892	0.211298	0.797233	0.31451	-2.20899	TLPE
Zm00001d004023	0.113755	0.867698	-0.157709	0.696326	-0.254717	0.529579	-0.309491	NoDiff
Zm00001d004025	-0.177966	0.860629	-0.292155	0.557621	-0.101847	0.890118	-5.36533	NoDiff
Zm00001d004033	-0.366477	0.304707	-0.16263	0.77682	0.220501	0.691263	-2.11094	NoDiff
Zm00001d004036	0.171836	0.841797	0.036607	0.960621	-0.120749	0.86074	1.90016	NoDiff
Zm00001d004042	1.65217	0.0272998	-0.994494	0.083919	-2.63667	2.1705e-07	-0.186939	AE
Zm00001d004048	0.338083	0.788283	0.694684	0.38216	0.379497	0.72903	2.96703	NoDiff
Zm00001d004051	-0.447907	0.374958	-0.883343	0.0111697	-0.418337	0.375291	-2.7636	NoDiff
Zm00001d004052	-0.11562	0.917339	-0.0119357	0.991146	0.124713	0.831736	-0.981593	NoDiff
Zm00001d004053	0.164317	0.836812	0.833867	0.060613	0.68722	0.180606	1.50316	NoDiff
Zm00001d004055	-3.60037	0.000416299	-2.76192	0.000211699	0.859104	0.728781	-3.03627	TLPE
Zm00001d004070	-0.00773282	0.99294	-0.151106	0.780017	-0.130202	0.816873	-1.57936	NoDiff
Zm00001d004071	-0.62847	0.72762	-0.643319	0.35055	0.0010131	0.999583	-55.9201	NoDiff
Zm00001d004074	-0.0649771	0.985524	0.255291	0.889443	0.329267	0.87529	0.461545	NoDiff
Zm00001d004075	0.069705	0.943219	-0.0969798	0.859174	-0.153401	0.80895	-0.366098	NoDiff
Zm00001d004083	-2.03301	0.0025846	1.35846	0.169991	3.41246	2.48221e-07	-0.677649	DLPE
Zm00001d004086	-0.538302	0.781892	-0.664871	0.404479	-0.105908	0.946706	-11.7453	NoDiff
Zm00001d004088	8.38793	9.86582e-08	-0.214936	0.835165	-8.58535	1.13897e-08	0.733257	DHPE
Zm00001d004090	0.430987	0.606827	0.181488	0.849028	-0.238203	0.791882	2.92845	NoDiff
Zm00001d004091	0.209042	0.756884	0.354018	0.480549	0.158967	0.762539	3.29105	NoDiff
Zm00001d004094	-0.254653	0.781045	-0.866234	0.0803772	-0.596354	0.302925	-1.73031	NoDiff
Zm00001d004095	-0.570068	0.472989	-0.561304	0.488543	0.0248824	0.982836	-21.1203	NoDiff
Zm00001d004096	-0.163587	0.967541	-0.430829	0.849336	-0.249195	0.919847	-2.45991	NoDiff
Zm00001d004099	-0.211543	0.814926	0.516583	0.24327	0.743293	0.0606902	0.248624	NoDiff
Zm00001d004105	-1.09732	0.297541	4.01619	0.00255932	5.13408	2.21168e-05	-0.116503	AE
Zm00001d004109	7.17055	3.25056e-35	-0.404645	0.465296	-7.55986	3.08506e-35	0.517122	DHPE
Zm00001d004116	7.6237	4.1474e-11	-0.218995	0.843601	-7.83887	2.66527e-13	0.717221	DHPE
Zm00001d004117	-1.46037	0.131713	3.68454	0.00743313	5.1659	2.17309e-06	-0.324265	AE
Zm00001d004118	0.0434077	0.972128	0.0390866	0.965003	0.00767681	0.990453	2.17183	NoDiff
Zm00001d004119	-0.154501	0.862075	-0.392483	0.288085	-0.223932	0.713227	-2.53544	NoDiff
Zm00001d004120	-0.221083	0.807611	0.18489	0.778688	0.426802	0.32327	-0.190766	NoDiff
Zm00001d004121	0.143629	0.937899	-0.397874	0.639663	-0.52862	0.609623	-0.59876	NoDiff
Zm00001d004123	0.0787634	0.95638	-0.457831	0.394243	-0.526763	0.421564	-0.817933	NoDiff
Zm00001d004125	0.482889	0.624646	0.482459	0.523206	0.00889714	0.992519	40.4373	NoDiff
Zm00001d004127	0.723852	0.070911	0.030348	0.971673	-0.676808	0.17111	1.15125	NoDiff
Zm00001d004132	-0.179053	0.847978	0.631912	0.194766	0.829644	0.141356	0.396508	NoDiff
Zm00001d004133	0.288093	0.808914	0.184743	0.723097	-0.0926059	0.923284	6.74579	NoDiff
Zm00001d004136	0.0535175	0.958139	-0.449953	0.2869	-0.487606	0.147431	-0.895353	NoDiff
Zm00001d004137	6.74739	5.73243e-19	-0.712882	0.170878	-7.44178	3.20426e-21	0.222729	AE
Zm00001d004138	-2.53623	NA	-0.84094	0.493045	1.71522	0.36422	-1.37433	NoDiff
Zm00001d004139	0.444794	0.710662	0.456559	0.579511	0.0198359	0.980631	26.8965	NoDiff
Zm00001d004140	0.352015	0.624634	-0.181509	0.777238	-0.521627	0.12587	0.207665	NoDiff
Zm00001d004143	-0.0466083	0.952474	-0.186391	0.672285	-0.12317	0.791714	-2.32769	NoDiff
Zm00001d004152	0.216339	0.714961	0.386769	0.246763	0.18873	0.67706	3.0753	NoDiff
Zm00001d004153	-0.133258	0.897722	0.53123	0.335891	0.684178	0.20489	0.451562	NoDiff
Zm00001d004154	-0.0306416	0.986566	0.169366	0.880463	0.207635	0.825078	0.460006	NoDiff
Zm00001d004159	-0.370622	0.60984	0.396404	0.419368	0.778428	0.071767	-0.132015	NoDiff
Zm00001d004162	4.99027	5.96535e-41	-0.242455	0.63227	-5.21502	1.33251e-38	0.690895	DHPE
Zm00001d004164	-0.0378712	0.97538	-0.655829	0.156191	-0.596968	0.177036	-1.18186	NoDiff
Zm00001d004165	0.1069	0.942928	-0.363304	0.416476	-0.456831	0.554298	-0.674764	NoDiff
Zm00001d004166	-0.464493	0.454245	1.418	8.38427e-05	1.90184	6.65487e-07	0.212077	AE
Zm00001d004167	0.564514	0.510318	-0.937018	0.00529022	-1.48686	0.00385606	-0.485709	AE
Zm00001d004168	-0.605775	0.380091	3.09174	7.88556e-15	3.71358	2.25799e-18	0.2286	AE
Zm00001d004169	-0.140407	0.871511	-0.436076	0.185651	-0.281334	0.60847	-2.0848	NoDiff
Zm00001d004172	-0.21872	0.863344	-0.385877	0.546226	-0.157037	0.850412	-4.0771	NoDiff
Zm00001d004176	0.0610049	0.959653	-0.412393	0.333786	-0.460923	0.34926	-0.851974	NoDiff
Zm00001d004187	0.020458	0.994922	1.00188	0.441122	1.00183	0.591377	0.968235	NoDiff
Zm00001d004190	0.191992	0.838602	0.0161927	0.980479	-0.156963	0.82615	1.37682	NoDiff
Zm00001d004192	-0.220474	0.911376	6.72175	1.08682e-09	6.96347	6.30949e-09	0.682002	DHPE
Zm00001d004193	-0.123552	0.880338	0.363838	0.241	0.504842	0.22404	0.343793	NoDiff
Zm00001d004196	0.371997	0.531111	0.304403	0.548413	-0.0520229	0.933353	22.4218	NoDiff
Zm00001d004198	0.658201	0.580338	0.0830523	0.956159	-0.551439	0.341441	1.48064	NoDiff
Zm00001d004200	0.479976	0.449871	0.182915	0.686509	-0.277792	0.673266	2.73704	NoDiff
Zm00001d004208	1.06414	0.658533	-0.0475369	0.982693	-1.10949	0.519202	0.872613	NoDiff
Zm00001d004209	0.627479	0.692793	0.297615	0.753859	-0.303642	0.827941	3.71226	NoDiff
Zm00001d004215	-0.0148342	0.989811	0.468132	0.354301	0.497382	0.376811	0.804637	NoDiff
Zm00001d004220	-0.21729	0.856154	3.59945	4.07372e-09	3.83184	1.66906e-08	0.664523	DHPE
Zm00001d004222	0.0213659	0.986566	0.454096	0.444151	0.444826	0.397586	0.967972	NoDiff
Zm00001d004230	10.3227	1.78219e-13	-0.0427454	0.971595	-10.3446	3.38215e-14	0.95926	DHPE
Zm00001d004236	-0.585565	0.709766	0.694922	0.540436	1.29574	0.215016	-0.16282	NoDiff
Zm00001d004242	1.2403	0.55017	1.21524	0.530722	-0.00100203	0.999675	234.098	NoDiff
Zm00001d004243	-0.570952	0.610928	-0.501716	0.536985	0.0771804	0.936678	-9.70517	NoDiff
Zm00001d004248	1.35982	0.00254335	0.653267	0.622833	-0.688109	0.618251	4.15652	NoDiff
Zm00001d004259	-0.148484	0.889989	-0.0678752	0.91855	0.0936378	0.905414	-2.04063	NoDiff
Zm00001d004260	0.0959184	0.963963	-0.214115	0.840315	-0.303884	0.786787	-0.532153	NoDiff
Zm00001d004270	-0.0837283	0.930928	0.200201	0.700269	0.302319	0.558969	0.257031	NoDiff
Zm00001d004298	0.453768	0.463783	0.294565	0.627259	-0.143001	0.856128	6.62858	NoDiff
Zm00001d004300	0.0420543	0.961345	0.169095	0.765531	0.143561	0.8253	1.18558	NoDiff
Zm00001d004331	-0.910115	NA	1.79374	0.31474	2.71066	NA	-0.11605	NoDiff
Zm00001d004332	7.60351	1.15525e-06	-0.63563	0.379732	-8.22539	7.13078e-09	0.288518	AE
Zm00001d004333	9.60994	6.49116e-12	-0.250684	0.700608	-9.84509	5.3211e-13	0.688407	DHPE
Zm00001d004336	-0.037068	0.987968	6.66714	0.00017024	6.72033	0.000867312	0.912331	DHPE
Zm00001d004339	0.263284	0.831617	0.639415	0.380173	0.38876	0.589559	2.42258	NoDiff
Zm00001d004340	1.42827	0.0253276	2.00489	1.04571e-07	0.588167	0.512003	10.5894	THPE
Zm00001d004354	0.389162	0.624189	0.314708	0.668301	-0.0595776	0.952427	19.416	NoDiff
Zm00001d004357	-0.754817	0.658533	-0.303413	0.833657	0.4769	0.773196	-1.88426	NoDiff
Zm00001d004361	0.510802	0.618042	-0.0527601	0.966035	-0.5544	0.162848	0.762407	NoDiff
Zm00001d004366	-2.28687	0.000142213	-1.40624	0.019211	0.892023	0.278389	-2.41283	TLPE
Zm00001d004372	-0.580674	0.0926739	-0.152435	0.723097	0.443395	0.186444	-1.50551	NoDiff
Zm00001d004375	-1.22214	0.039252	-0.521347	0.472059	0.71808	0.188131	-1.89554	NoDiff
Zm00001d004380	-0.473335	0.906193	-1.18263	0.642163	-0.685141	0.827912	-1.99043	NoDiff
Zm00001d004382	-1.15854	0.0849536	7.79974	3.19838e-07	8.97711	3.34891e-10	-0.121264	AE
Zm00001d004383	0.432362	0.493064	0.142562	0.81824	-0.277216	0.55608	2.30104	NoDiff
Zm00001d004386	0.17208	0.844515	-0.0591004	0.926963	-0.212606	0.681444	0.47289	NoDiff
Zm00001d004388	4.88092	0.183517	1.25895	0.637046	-3.59993	0.337207	4.06893	NoDiff
Zm00001d004389	1.06215	0.751624	1.58807	0.213255	0.562672	0.866676	7.22774	NoDiff
Zm00001d004392	0.00315655	0.996978	0.792102	0.0365165	0.805209	0.0499274	0.921492	NoDiff
Zm00001d004396	-0.147646	0.878932	0.437787	0.335441	0.598258	0.128414	0.343536	NoDiff
Zm00001d004400	0.0605432	0.938588	-0.390334	0.253012	-0.436463	0.238112	-0.857111	NoDiff
Zm00001d004407	0.353948	0.576018	0.529751	0.242715	0.194644	0.775326	4.67705	NoDiff
Zm00001d004409	-0.372669	0.658533	0.534858	0.295596	0.920068	0.0567674	-0.0093142	NoDiff
Zm00001d004410	0.096485	0.934976	-0.122664	0.822183	-0.199403	0.777918	-0.287062	NoDiff
Zm00001d004413	-2.93517	2.34473e-09	-1.52343	2.15439e-05	1.42702	0.00529644	-1.75335	DLPE
Zm00001d004415	0.210393	0.765972	0.946385	0.0573584	0.753124	0.134395	1.65203	NoDiff
Zm00001d004416	0.501	0.658437	0.480235	0.580661	-0.0131954	0.990179	203.52	NoDiff
Zm00001d004417	6.89558	4.39402e-05	-0.772676	0.364031	-7.64795	4.86635e-07	0.176498	AE
Zm00001d004418	0.207992	0.891039	1.46049	0.0202144	1.27266	0.0635776	1.45143	NoDiff
Zm00001d004426	0.84143	0.377453	0.339664	0.688965	-0.484191	0.674784	2.98518	NoDiff
Zm00001d004428	-0.174696	0.880685	-0.0945129	0.91588	0.100951	0.875643	-2.24707	NoDiff
Zm00001d004433	-0.776402	0.0938943	9.28382	3.8136e-12	10.0779	2.18317e-14	0.143177	AE
Zm00001d004434	1.79612	0.0597892	-0.0268536	0.984997	-1.81061	0.0425005	0.962363	DHPE
Zm00001d004435	0.00130576	0.998873	1.04591	0.190723	1.06426	0.249222	0.926667	NoDiff
Zm00001d004437	-1.81051	0.178257	1.37289	0.560183	3.20424	0.0171711	-0.611549	DLPE
Zm00001d004438	-0.131118	0.89769	0.278579	0.641761	0.422672	0.426606	0.211857	NoDiff
Zm00001d004446	1.71976	0.00159633	0.371353	0.746152	-1.33296	0.155737	1.99406	NoDiff
Zm00001d004448	0.38614	0.73168	-0.357151	0.678505	-0.71826	0.303334	-0.100083	NoDiff
Zm00001d004451	0.43163	0.933537	5.98928	0.0163958	5.57243	0.155737	1.65924	NoDiff
Zm00001d004457	0.13373	0.924173	-0.0575511	0.954868	-0.178305	0.828932	0.312307	NoDiff
Zm00001d004458	0.068857	0.936457	0.237167	0.645041	0.186592	0.739499	1.43274	NoDiff
Zm00001d004460	-0.570419	0.351248	0.207891	0.785214	0.790068	0.12587	-0.578915	NoDiff
Zm00001d004463	0.174474	0.810869	0.428167	0.287566	0.26653	0.510956	2.19641	NoDiff
Zm00001d004465	0.7157	0.439384	-0.49417	0.37509	-1.1939	0.0469897	-0.0233507	AE
Zm00001d004466	-0.0233135	0.982901	-0.116	0.878448	-0.0791916	0.915229	-2.67249	NoDiff
Zm00001d004468	0.725907	0.122957	0.21502	0.650182	-0.494949	0.340046	2.18774	NoDiff
Zm00001d004469	0.287697	0.710662	0.0301551	0.975514	-0.243056	0.745609	1.34795	NoDiff
Zm00001d004471	13.3541	1.79935e-25	0.0524196	0.927837	-13.2847	1.35202e-25	1.08602	DHPE
Zm00001d004472	-0.0400379	0.965548	-0.375492	0.343107	-0.320621	0.526624	-1.38385	NoDiff
Zm00001d004473	0.133124	0.884836	-0.169531	0.768361	-0.28953	0.630114	-0.240958	NoDiff
Zm00001d004475	-1.32812	0.0183158	10.9184	1.18842e-16	12.2675	1.63758e-20	-0.220153	AE
Zm00001d004477	-0.00190516	0.997966	0.495697	0.146984	0.516999	0.264355	0.861	NoDiff
Zm00001d004478	-0.0941566	0.930431	0.184253	0.685885	0.293063	0.613961	0.178146	NoDiff
Zm00001d004480	0.284497	0.833324	0.113223	0.917855	-0.147685	0.880068	3.21946	NoDiff
Zm00001d004482	0.755611	0.909919	0.391497	0.903458	-0.331532	0.939546	4.4555	NoDiff
Zm00001d004485	0.692858	0.701979	-0.136367	0.943852	-0.811396	0.637612	0.60872	NoDiff
Zm00001d004486	4.44946	0.00368139	1.91446	0.255122	-2.53648	0.436312	7.71869	NoDiff
Zm00001d004488	-1.56346	0.0443118	7.98791	2.29232e-07	9.57608	2.00324e-11	-0.337668	AE
Zm00001d004489	-1.32984	0.117219	7.52257	4.21499e-07	8.87264	8.94795e-10	-0.224531	AE
Zm00001d004495	0.875022	0.267283	-0.340852	0.680569	-1.20542	0.0379644	0.262517	AE
Zm00001d004497	2.68409	0.173093	1.9905	0.112346	-0.67008	0.840946	17.5395	NoDiff
Zm00001d004498	-0.366785	0.454521	-0.120258	0.793135	0.264328	0.573208	-1.68218	NoDiff
Zm00001d004501	1.32348	0.102607	0.153244	0.891662	-1.15442	0.213358	1.43499	NoDiff
Zm00001d004506	4.34754	3.72022e-05	1.45719	0.0901714	-2.88005	0.0413376	5.05355	THPE
Zm00001d004509	0.462028	0.885769	2.90537	0.0444675	2.44713	0.12149	1.86223	NoDiff
Zm00001d004512	-0.0355825	0.983774	0.551498	0.403641	0.597629	0.403011	0.749179	NoDiff
Zm00001d004513	0.0691643	0.953764	-0.121862	0.826373	-0.179405	0.791003	-0.462292	NoDiff
Zm00001d004514	-2.08487	0.346055	3.48406	0.50318	5.6005	0.0356661	-0.540187	DLPE
Zm00001d004517	0.0602821	0.943769	0.034587	0.953336	-0.00820278	0.989797	6.2937	NoDiff
Zm00001d004521	0.217067	0.809217	-0.0794919	0.89819	-0.283621	0.63775	0.399413	NoDiff
Zm00001d004523	0.998058	0.756798	-0.340846	0.890474	-1.32373	0.478857	0.32347	NoDiff
Zm00001d004531	8.37767	3.1262e-12	0.0982013	0.893922	-8.2611	5.38426e-12	1.15409	DHPE
Zm00001d004534	6.43569	2.32707e-07	-1.29378	0.21884	-7.70749	3.73382e-10	-0.181375	AE
Zm00001d004537	-1.65697	0.413586	4.71876	0.139694	6.38381	0.00538921	-0.375622	AE
Zm00001d004539	0.717573	0.419876	-0.903385	0.116528	-1.61304	0.00293298	-0.385803	AE
Zm00001d004541	-0.0499143	0.970356	-0.257772	0.666733	-0.197266	0.758595	-1.77485	NoDiff
Zm00001d004543	-0.574941	0.330476	0.0948452	0.825027	0.683838	0.157214	-0.76389	NoDiff
Zm00001d004545	-0.183604	0.887755	0.398935	0.627589	0.598669	0.463847	0.212655	NoDiff
Zm00001d004546	0.29106	0.737312	0.181157	0.769157	-0.091942	0.902974	6.8424	NoDiff
Zm00001d004547	0.579344	0.409966	0.305304	0.592934	-0.260334	0.710028	4.11764	NoDiff
Zm00001d004551	0.117106	0.873436	0.210981	0.619466	0.11131	0.839808	2.47318	NoDiff
Zm00001d004552	-0.284568	0.654993	-0.0870408	0.877991	0.215515	0.706899	-1.58906	NoDiff
Zm00001d004553	0.667046	0.440538	-0.228221	0.80442	-0.871435	0.211653	0.380718	NoDiff
Zm00001d004554	0.21942	0.847692	0.0891991	0.896751	-0.109047	0.895737	3.39326	NoDiff
Zm00001d004557	0.366146	0.596493	0.442849	0.187482	0.0944361	0.899849	7.90125	NoDiff
Zm00001d004559	0.198679	0.816581	0.796488	0.0478228	0.613589	0.129027	1.69801	NoDiff
Zm00001d004560	-0.675131	0.351961	0.928063	0.135361	1.62214	0.00216878	-0.138101	AE
Zm00001d004561	0.11351	0.913411	0.282101	0.587263	0.188261	0.774447	1.90256	NoDiff
Zm00001d004564	0.573156	0.229878	0.319154	0.576202	-0.240483	0.704355	4.55253	NoDiff
Zm00001d004568	-0.10988	0.900622	0.348217	0.399594	0.475362	0.191976	0.382642	NoDiff
Zm00001d004571	7.40599	3.40551e-05	-2.1525	0.0239667	-9.54525	3.50768e-09	-0.548307	DLPE
Zm00001d004573	0.12264	0.879509	-0.308671	0.488946	-0.415642	0.329751	-0.557552	NoDiff
Zm00001d004576	-0.743174	0.472158	3.65449	4.43263e-06	4.42064	1.72819e-08	0.128951	AE
Zm00001d004577	-2.56456	0.309749	-0.867384	0.837177	1.7291	0.481751	-1.38097	NoDiff
Zm00001d004580	-0.614083	0.849026	-0.333936	0.907139	0.299299	0.901911	-2.60767	NoDiff
Zm00001d004586	0.431755	0.430501	0.376118	0.274325	-0.0371274	0.957409	51.871	NoDiff
Zm00001d004589	-0.476809	0.9387	0.363034	0.928742	0.863182	0.829238	-0.30005	NoDiff
Zm00001d004591	0.124015	0.846207	-0.242794	0.581403	-0.351108	0.382394	-0.459799	NoDiff
Zm00001d004595	-0.855011	0.0148946	6.2731	9.38492e-22	7.14597	1.99362e-28	0.0783737	AE
Zm00001d004602	-0.0962807	0.984397	-0.408681	0.906161	-0.297335	0.941754	-1.7631	NoDiff
Zm00001d004605	-0.990144	0.193562	7.45484	3.92111e-07	8.46336	3.01176e-09	-0.0147735	AE
Zm00001d004616	0.0794297	0.928031	0.239594	0.575755	0.1741	0.747458	1.59697	NoDiff
Zm00001d004619	-2.73547	0.486984	2.64542	0.742606	5.42146	0.179757	-0.707305	NoDiff
Zm00001d004635	0.344785	0.845049	0.947253	0.159589	0.61561	0.634468	2.40328	NoDiff
Zm00001d004637	11.6966	4.91695e-19	-0.458111	0.326515	-12.1374	6.56698e-21	0.464968	AE
Zm00001d004639	0.516421	0.671033	0.171259	0.868172	-0.337993	0.63939	2.26149	NoDiff
Zm00001d004644	1.09435	9.61828e-05	-0.806022	0.0131293	-1.88448	3.34891e-10	-0.171801	AE
Zm00001d004649	1.18539	7.34802e-05	0.766367	0.140467	-0.403861	0.537012	7.04808	NoDiff
Zm00001d004650	-0.011426	0.992776	0.294971	0.664489	0.32628	0.603924	0.751317	NoDiff
Zm00001d004651	0.0412322	0.965782	-0.471547	0.133892	-0.494693	0.232699	-0.954043	NoDiff
Zm00001d004655	-0.177263	0.866917	-0.208763	0.705115	-0.0153322	0.986633	-149.319	NoDiff
Zm00001d004657	-0.288028	0.977398	3.20755	0.677362	3.53622	0.619472	0.605519	NoDiff
Zm00001d004658	-0.942335	0.828695	0.717311	0.83725	1.67233	0.655572	-0.424783	NoDiff
Zm00001d004659	-0.467818	0.33558	0.69329	0.0493179	1.17745	0.000483229	-0.0341304	AE
Zm00001d004664	-6.96819	0.00023225	-5.13094	0.0777172	1.8507	0.353508	-1.73476	NoDiff
Zm00001d004667	-0.0566202	0.967453	-0.13785	0.86398	-0.0700192	0.937233	-4.08302	NoDiff
Zm00001d004669	0.340525	0.610705	0.243022	0.692669	-0.0850024	0.880733	9.40123	NoDiff
Zm00001d004670	-0.901721	0.537322	1.55828	0.141751	2.47606	0.0239527	-0.156457	AE
Zm00001d004672	0.903937	0.311441	0.384592	0.70978	-0.498761	0.646508	3.25276	NoDiff
Zm00001d004675	-0.144504	0.9682	0.442261	0.788925	0.610123	0.792146	0.349561	NoDiff
Zm00001d004676	-0.0545123	0.979481	-0.555479	0.509751	-0.494665	0.60952	-1.27091	NoDiff
Zm00001d004677	-0.390882	0.828695	0.0452044	0.980103	0.451655	0.723502	-0.81701	NoDiff
Zm00001d004682	-0.313795	0.89769	0.136336	0.950316	0.468338	0.810874	-0.477058	NoDiff
Zm00001d004687	2.58546	0.0264056	-0.700765	0.523111	-3.27444	2.60031e-05	0.142892	AE
Zm00001d004689	-0.771331	0.289177	-0.35526	0.558243	0.425188	0.476919	-2.21006	NoDiff
Zm00001d004690	-0.021521	0.991197	0.719279	0.245625	0.761619	0.471967	0.82528	NoDiff
Zm00001d004691	-0.239671	0.924317	2.08613	0.125108	2.33589	0.0525869	0.581235	NoDiff
Zm00001d004697	1.70547	0.00898653	1.62812	0.00456506	-0.0605343	0.965748	152.693	THPE
Zm00001d004698	0.948184	0.532203	1.18222	0.123351	0.255842	0.872399	11.2723	NoDiff
Zm00001d004700	3.20456	2.81039e-08	-1.54735	0.0011273	-4.73203	5.08397e-30	-0.362788	AE
Zm00001d004702	0.0980837	0.940462	-0.00994594	0.99219	-0.0960408	0.909591	0.830296	NoDiff
Zm00001d004705	-2.75119	0.114448	2.16079	0.360782	4.93374	0.000577907	-0.764625	DLPE
Zm00001d004706	-1.98132	1.78081e-05	0.0398407	0.968111	2.04025	2.27179e-13	-0.975765	DLPE
Zm00001d004707	-0.179843	0.84793	0.122204	0.862773	0.315432	0.584639	-0.29637	NoDiff
Zm00001d004708	-0.0542179	0.969984	0.0261738	0.976597	0.102166	0.904939	-0.394105	NoDiff
Zm00001d004709	0.24361	0.828976	-0.283335	0.713207	-0.516234	0.200622	-0.219772	NoDiff
Zm00001d004713	6.30799	6.54394e-11	-0.357987	0.549389	-6.64027	1.52455e-13	0.563169	DHPE
Zm00001d004716	0.208978	0.844542	0.708841	0.192743	0.516465	0.45318	1.84515	NoDiff
Zm00001d004723	-0.0290572	0.985872	0.830472	0.241338	0.871695	0.227514	0.829833	NoDiff
Zm00001d004731	-0.116129	0.959089	-1.43347	0.0673909	-1.29926	0.151661	-1.13212	NoDiff
Zm00001d004734	-1.85622	0.005082	-0.762456	0.124484	1.10468	0.15668	-1.68971	NoDiff
Zm00001d004737	0.284798	0.711619	0.487596	0.369734	0.215245	0.692338	3.59196	NoDiff
Zm00001d004739	0.0918981	0.909162	0.0105414	0.985303	-0.0639315	0.91042	1.84266	NoDiff
Zm00001d004740	-0.129286	0.90761	-0.257637	0.578839	-0.114031	0.883928	-3.95536	NoDiff
Zm00001d004744	0.562836	0.481569	0.86295	0.156675	0.31859	0.710759	5.30758	NoDiff
Zm00001d004746	-1.03673	0.727757	1.41598	0.497933	2.47422	0.213721	-0.271616	NoDiff
Zm00001d004751	-0.313009	0.584148	0.123733	0.850607	0.449723	0.368731	-0.510888	NoDiff
Zm00001d004753	1.075	0.248077	0.504345	0.455279	-0.557068	0.585194	3.74953	NoDiff
Zm00001d004755	-0.529828	0.782389	6.87074	0.00012543	7.42355	2.64844e-05	0.357721	AE
Zm00001d004758	0.764717	0.286269	0.634534	0.259165	-0.11067	0.901044	19.7238	NoDiff
Zm00001d004762	0.133616	0.91502	-0.554266	0.25715	-0.667584	0.323512	-0.740128	NoDiff
Zm00001d004768	-1.19636	0.00804516	-0.325105	0.607026	0.88391	0.111447	-1.4545	NoDiff
Zm00001d004771	-0.0186291	0.986566	0.212154	0.790541	0.246388	0.767227	0.63232	NoDiff
Zm00001d004772	-0.799258	0.0541328	1.46347	0.000468282	2.28099	5.39806e-09	-0.0956383	AE
Zm00001d004775	0.321728	0.730534	0.66607	0.12315	0.361484	0.611266	2.92116	NoDiff
Zm00001d004779	-0.0525547	0.95209	0.060584	0.917855	0.13081	0.766165	-0.0767717	NoDiff
Zm00001d004782	-0.00281201	0.996954	-0.299559	0.443926	-0.28205	0.493383	-1.20709	NoDiff
Zm00001d004784	0.507734	0.768609	-0.320435	0.808539	-0.824491	0.369078	0.062793	NoDiff
Zm00001d004785	-0.0493457	0.965374	0.27357	0.585246	0.334477	0.531964	0.53362	NoDiff
Zm00001d004790	-0.034923	0.965191	0.102763	0.836728	0.155038	0.772854	0.241305	NoDiff
Zm00001d004804	0.337149	0.643561	-0.101434	0.899023	-0.418458	0.524965	0.499959	NoDiff
Zm00001d004807	-0.289449	0.575133	0.123884	0.763422	0.428969	0.26086	-0.478323	NoDiff
Zm00001d004810	0.614597	0.537195	0.497279	0.50837	-0.110221	0.891563	14.3359	NoDiff
Zm00001d004812	-0.0997842	0.940205	-1.43963	0.0159216	-1.32997	0.0270101	-1.11269	DLPE
Zm00001d004814	-0.38709	0.695535	-0.63049	0.412054	-0.226731	0.830769	-4.21306	NoDiff
Zm00001d004817	0.21221	0.804662	3.95097	2.0759e-20	3.75799	6.40962e-17	1.29792	DHPE
Zm00001d004818	1.54319	0.000643141	0.742413	0.182835	-0.783434	0.24576	4.31303	THPE
Zm00001d004821	-0.28015	0.667337	-0.590234	0.140855	-0.294621	0.527164	-2.80872	NoDiff
Zm00001d004822	3.32789	0.016349	-0.630916	0.616839	-3.94639	0.00277526	0.248203	AE
Zm00001d004831	0.14101	0.976727	-0.640715	0.703817	-0.777571	0.760148	-0.755788	NoDiff
Zm00001d004836	0.223268	0.82334	2.33214	2.88952e-06	2.1238	5.89813e-05	1.37074	DHPE
Zm00001d004837	0.0481466	0.958323	0.426021	0.42313	0.396106	0.412144	1.12082	NoDiff
Zm00001d004839	-0.208772	0.821009	-0.308	0.444297	-0.086903	0.910099	-7.08368	NoDiff
Zm00001d004840	2.05432	0.0693141	0.675066	0.386392	-1.36596	0.277946	2.99761	NoDiff
Zm00001d004841	-0.239131	0.715431	-0.129744	0.771729	0.123282	0.836597	-2.58524	NoDiff
Zm00001d004843	1.08895	0.125023	1.54208	0.0625485	0.468864	0.66549	8.63011	NoDiff
Zm00001d004848	-0.336655	0.80056	-0.0798909	0.95854	0.271752	0.842114	-1.41619	NoDiff
Zm00001d004851	-0.737746	0.179901	-0.53599	0.286362	0.214495	0.790052	-4.47077	NoDiff
Zm00001d004852	-0.493154	0.843701	0.356345	0.825127	0.864143	0.605318	-0.324453	NoDiff
Zm00001d004854	1.89736	0.873618	-3.48966	0.265224	-5.36786	0.210411	-0.820368	NoDiff
Zm00001d004855	0.600956	0.488835	0.424445	0.25942	-0.166479	0.861391	8.12666	NoDiff
Zm00001d004856	0.126817	0.887812	0.207649	0.70866	0.0971785	0.881316	2.81825	NoDiff
Zm00001d004857	-0.49048	0.183517	0.0790061	0.875536	0.585188	0.0865076	-0.761676	NoDiff
Zm00001d004861	-0.0995901	0.889019	-0.296536	0.479673	-0.182375	0.680603	-2.42172	NoDiff
Zm00001d004867	-0.832172	0.737073	6.92457	0.000494761	7.78313	2.80075e-05	0.101807	AE
Zm00001d004868	0.145338	0.882103	-0.366364	0.431103	-0.495829	0.224347	-0.579733	NoDiff
Zm00001d004869	-1.41984	0.055737	8.14869	5.70679e-08	9.59205	1.57424e-11	-0.268554	AE
Zm00001d004874	0.738245	0.574821	-0.373805	0.737168	-1.09838	0.145137	0.154058	NoDiff
Zm00001d004875	-0.310987	0.813502	-0.517249	0.110419	-0.184892	0.860299	-4.50663	NoDiff
Zm00001d004876	0.956539	0.126593	0.781876	0.360301	-0.159883	0.904915	16.6604	NoDiff
Zm00001d004877	-0.409563	0.587899	1.16145	0.00499476	1.5825	0.000132641	0.22248	AE
Zm00001d004880	-0.490941	0.871134	2.79537	0.222507	3.29689	0.139705	0.327275	NoDiff
Zm00001d004881	2.74135	0.00496615	1.52396	0.285919	-1.20437	0.569758	7.79068	NoDiff
Zm00001d004882	0.417447	0.898425	1.01534	0.405492	0.618751	0.796223	2.73172	NoDiff
Zm00001d004885	-0.0661699	0.939796	1.34112	0.000577899	1.42295	0.000392161	0.799727	DHPE
Zm00001d004890	8.20246	3.59025e-07	-0.477476	0.612372	-8.66582	7.91951e-09	0.440539	AE
Zm00001d004892	-0.780423	0.351905	1.07529	0.0393527	1.87599	0.00134425	-0.177407	AE
Zm00001d004894	0.351271	0.813818	0.679552	0.333368	0.342945	0.75734	3.31083	NoDiff
Zm00001d004896	0.100889	0.897722	-0.132608	0.768021	-0.219402	0.650127	-0.278832	NoDiff
Zm00001d004898	0.31484	0.632562	0.126145	0.809816	-0.170461	0.766338	2.95931	NoDiff
Zm00001d004903	0.618429	0.836678	1.72232	0.216318	1.10696	0.527258	2.88886	NoDiff
Zm00001d004908	-3.07646	0.045691	-0.543206	0.824421	2.54773	0.0746411	-1.12575	NoDiff
Zm00001d004910	0.457859	0.809217	-0.724424	0.357761	-1.16693	0.2719	-0.427673	NoDiff
Zm00001d004913	-0.1261	0.879179	-0.016732	0.986364	0.125356	0.876519	-1.11684	NoDiff
Zm00001d004914	3.20647	0.00357191	-1.31138	0.0443616	-4.50403	6.59727e-09	-0.244635	AE
Zm00001d004916	-0.0996426	0.930623	0.817872	0.0471054	0.937147	0.0675304	0.647433	NoDiff
Zm00001d004917	0.48775	0.769843	0.461639	0.547081	0.000233656	0.999899	50.2382	NoDiff
Zm00001d004921	-7.00732	0.0370469	-5.49264	0.246944	1.52751	0.73117	-2.0472	NoDiff
Zm00001d004924	0.478914	0.629064	0.615728	0.375921	0.153011	0.896069	7.55249	NoDiff
Zm00001d004925	-0.286029	0.513171	0.249008	0.559055	0.550348	0.0953051	-0.199458	NoDiff
Zm00001d004927	0.106715	0.952851	-0.117721	0.916835	-0.19915	0.830055	-0.158063	NoDiff
Zm00001d004929	0.154501	0.936664	0.293615	0.7444	0.160432	0.908818	2.50803	NoDiff
Zm00001d004930	-0.0527391	0.951293	-0.102165	0.869719	-0.0358947	0.9584	-10.1967	NoDiff
Zm00001d004931	-0.0212086	0.98553	0.25389	0.709016	0.293779	0.70114	0.65371	NoDiff
Zm00001d004933	0.810919	0.162385	-0.231888	0.773784	-1.03193	0.0287569	0.414874	AE
Zm00001d004934	0.0596071	0.952105	0.291837	0.686831	0.246493	0.730548	1.26714	NoDiff
Zm00001d004936	-1.32201	0.00287072	-0.971026	0.0291554	0.368334	0.475634	-4.13501	TLPE
Zm00001d004943	7.26082	2.73992e-11	-0.242985	0.835613	-7.4952	3.92794e-13	0.688426	DHPE
Zm00001d004948	7.84491	5.94126e-06	-0.272116	0.823434	-8.10291	2.88096e-07	0.660724	DHPE
Zm00001d004956	0.279491	0.654863	-0.0199078	0.978526	-0.286521	0.4426	0.86996	NoDiff
Zm00001d004957	-0.0607509	0.949396	-0.571889	0.626389	-0.492747	0.691879	-1.30351	NoDiff
Zm00001d004959	0.71627	0.0567924	-0.491818	0.155807	-1.19212	0.000219303	-0.0243933	AE
Zm00001d004960	0.23345	0.779048	-0.0457731	0.953365	-0.266853	0.562612	0.633077	NoDiff
Zm00001d004966	0.00328932	0.997389	1.12366	0.232346	1.13881	0.266954	0.937066	NoDiff
Zm00001d004968	-1.38978	0.000346399	9.59073	1.70939e-12	10.9948	3.6769e-17	-0.25089	AE
Zm00001d004972	-0.593542	0.462355	1.09463	0.125719	1.70836	0.000529352	0.000200029	AE
Zm00001d004976	-0.192372	0.822436	-0.340317	0.566121	-0.136016	0.850885	-4.33648	NoDiff
Zm00001d004977	0.0136926	0.992152	0.221315	0.721441	0.221589	0.805542	0.892799	NoDiff
Zm00001d004978	0.389656	0.548821	0.775329	0.0314552	0.40052	0.492311	3.25695	NoDiff
[truncated: 22,687 more rows]
