# Supplementary material for: Integrated Multi-Omics Reveals Significant Roles of Non-Additively Expressed Small RNAs in Heterosis for Maize Plant Height
Source: Int J Mol Sci. 2023 May 23;24(11):9150. doi: 10.3390/ijms24119150 (PMC10252383; doi:10.3390/ijms24119150)
Supplement: Supplementary file 1 [file ijms-24-09150-s001.zip › Table-S5.xlsx]

## Sheet: New
Table S5. siRNA clusters identified by ShortStack.
siRNA_ID	Dicer_Call	Locus	Length	Major_sRNA	Complexity	Phase_Score
Cluster_4	24	1:42484-43973	1490	ACCGUUGGACUGUGAGGGGGUCGG	0.635	0.1
Cluster_6	24	1:50211-50644	434	UCACCCAUGAGCCGGAUUGGACCC	0.362	1.2
Cluster_7	24	1:50721-50851	131	ACCCGAAACGGAGGUUCAAAUAUU	0.477	0
Cluster_8	24	1:56751-57811	1061	AUUAUUUCCGACGGCUUAAGACGU	0.373	1
Cluster_10	24	1:82002-82969	968	AGGUAACCGUCGGAAAUAAUGGGG	0.296	1.9
Cluster_11	24	1:83269-83557	289	UAGAUAAUCAAACAUGGAAAACGU	0.672	0
Cluster_13	24	1:90823-92284	1462	AGCCGUCGUCGAUGUUCGGCCACC	0.561	0.3
Cluster_16	24	1:107259-108176	918	CACCUGGAUCGCUGAUCACUCCGG	0.634	0.1
Cluster_18	24	1:111438-112260	823	GCGAAUGGACUUUGCAAUGGCACC	0.775	0
Cluster_22	24	1:115756-117408	1653	AACGUGGAUCCAGAUGAUGAUAGC	0.743	0.1
Cluster_30	24	1:137482-138280	799	CGGACGGAUUCCAGCGUAAAACGU	0.509	0.7
Cluster_32	24	1:140355-140781	427	AUUCCGGAAAAUAUUUAGCACAGC	0.92	0
Cluster_33	24	1:147860-148333	474	CUUUCUCCCCUUGGCGCAGGUUCC	0.786	0
Cluster_35	24	1:155373-155503	131	AAAGCCAAAGUCAAAAGUUAAACC	0.547	0
Cluster_36	24	1:155625-156476	852	AGCCCAGUCUGUGAACUUCGCUGC	0.315	2
Cluster_37	24	1:156793-157477	685	AGAGAAGUGUCUGACUUGGCCUCC	0.636	0.2
Cluster_39	24	1:159633-160393	761	AGAUCGAUGCAGCCUGAGCACCCA	0.705	0
Cluster_40	24	1:160797-161451	655	GAGUACACCGUCGCUGCCCUCGCC	0.794	0.1
Cluster_41	24	1:171168-175126	3959	AUGGAUUAGGCCCAUGUGGCUAGG	0.629	0.3
Cluster_42	24	1:175748-177701	1954	CCUAAGCCCACUCCGGCCCAGCUA	0.709	0.2
Cluster_44	24	1:180100-180743	644	AGAGGACCAGUACAAAAAACCACC	0.76	0
Cluster_45	24	1:199174-200571	1398	AUAAACUAUACUAGGUGAGUGUCC	0.331	1.1
Cluster_48	24	1:207473-209839	2367	AGGUCAGCGUCCACACUCUAGCGC	0.411	3.2
Cluster_52	24	1:214300-216481	2182	AUAUAUAAGCCAACAGUGUAGACC	0.465	1.1
Cluster_53	24	1:219473-219732	260	AGGUUAGUGUAGACUGCCCCCGCC	0.316	-1
Cluster_60	24	1:265273-265936	664	AUAUGCAUUGGCAUCUUUGUGU	0.51	0.1
Cluster_61	24	1:275482-277285	1804	AUCGACCAGUCCGGUGCGAACACC	0.414	0.3
Cluster_62	24	1:280361-281663	1303	CUGGACACAUGGCACCAUCGGACC	0.396	1.2
Cluster_63	24	1:324009-325166	1158	AAACCGGUGGACAAUAAGAUUUAU	0.497	0.5
Cluster_64	24	1:326597-327667	1071	AAAGAAUCUGUGAGAUAUUGAGGU	0.665	0.1
Cluster_66	24	1:329823-330207	385	GCAGAUCAUACCCUGUAGACUCUU	0.812	0
Cluster_67	24	1:330325-331282	958	AUUGGACUAUAACUAGAAAUUCCC	0.533	0.3
Cluster_68	24	1:332349-332692	344	AGAAAAGACAUAUAGAUAACUCUA	0.512	0.1
Cluster_71	24	1:337144-338183	1040	AAUUGUCCCGUGCGCGCAGACACC	0.494	0.1
Cluster_77	24	1:348076-349633	1558	AGUGAUAGCGGCUGUAGCAUCCGU	0.743	0.1
Cluster_82	22	1:371919-374320	2402	AGUAUAGUAUAGGCAAGUAAUC	0.706	-1
Cluster_83	22	1:375667-376075	409	AGAGAGAUCGUAUGUAUCACCAGC	0.83	-1
Cluster_84	22	1:376613-377097	485	AACCAAAACCCUCUAUCUCAUGCC	0.805	-1
Cluster_86	24	1:378912-379626	715	CUCAGACCAAUUAACUUGACACCU	0.559	0.2
Cluster_87	24	1:380278-380828	551	AGGGCGCCAGCAACUCGAACGACC	0.632	0.1
Cluster_88	24	1:403090-403778	689	AGAGAAAGAUGUUCUGAUUCAGUU	0.508	0.3
Cluster_91	24	1:407607-407792	186	ACUGUACAGGUCCGAGGACCGAGA	0.586	0
Cluster_92	24	1:408489-408972	484	AUCCCGCUCACUGCCCUAUGGACC	0.573	0.2
Cluster_96	24	1:418016-419172	1157	AAUACAAACGAGCCGAGUCGAGCC	0.403	0.5
Cluster_97	23	1:426845-426868	24	AGAUCUAACAAGUUGGCUUUCAG	0.038	-1
Cluster_98	24	1:429803-430310	508	ACAAUCCAUAGAGACAAAAACACU	0.465	0.3
Cluster_99	24	1:431009-431737	729	AAAAAAACCACGGGAAAACAGAUC	0.735	0.1
Cluster_102	24	1:435930-437059	1130	AUCCUCGCCCAAGCCCGAUGCGCC	0.621	0.2
Cluster_103	24	1:439448-440611	1164	AAUCCUAAACGAACAAGAGACAUC	0.427	0.2
Cluster_105	24	1:443915-444757	843	GUUUGCAACGCCUUUCGAACACCC	0.397	0.5
Cluster_106	24	1:444907-445268	362	CGGAAAAACAGAUCUAUUAAGAGC	0.291	0.4
Cluster_107	24	1:445704-446101	398	AAUACACCACAUAAGAGCAUCUCC	0.337	0.6
Cluster_108	24	1:446350-447014	665	CCUACGUUUUAGACCGGAGAGGCC	0.552	0.2
Cluster_109	24	1:448455-448739	285	CCUCCCGUAGGCUAUGGCACACGU	0.678	0.1
Cluster_110	24	1:456952-457516	565	AUGGUAACCUAGACCCCAAAUCCA	0.873	0
Cluster_111	24	1:464011-464522	512	AUAGCUCGUGGGAGGCCAAGAACC	0.764	0.1
Cluster_112	24	1:468001-468414	414	AUCGCAGAGCCAAUUAUCGAUGCC	0.62	0.1
Cluster_113	24	1:469488-470353	866	CGGACCAAGAAUCCAAGAUGUCGC	0.317	0.8
Cluster_114	24	1:502765-503108	344	AUUUCGGUCUGUCGUUUCUCGCCU	0.481	0.1
Cluster_115	24	1:504074-504443	370	AAUCGAACACAUCGGAAGCGAGGC	0.276	0.5
Cluster_116	24	1:558956-559863	908	AUUAGUCCCUAGGAACCAAACACC	0.599	0.2
Cluster_122	24	1:573425-574385	961	CUUGAUGGGCUGGACUGAUCGGGG	0.256	1.3
Cluster_124	24	1:655294-655492	199	AAAGUGUUGCUCUCGGGAAUCGAC	0.52	0
Cluster_125	24	1:687148-687949	802	AAUUUUGCUGACGAGGAUAGAAUA	0.364	0.7
Cluster_126	24	1:691154-691447	294	AGAGGAUAGCAGUCGCUUUUUGAC	0.523	0.2
Cluster_128	24	1:695153-697152	2000	AGGGUUUCCGGCAAUGUAGGCGCC	0.748	0.1
Cluster_129	24	1:697233-698711	1479	AUUGGAAACCCUAACCCUAACAGG	0.678	0.4
Cluster_131	24	1:699406-699824	419	ACACGACGUAACCGGAGGUGGACC	0.845	0.1
Cluster_132	24	1:699914-700923	1010	CGCCCCUCUGUAAUGGGCCUGGCC	0.686	0.1
Cluster_133	24	1:701031-702651	1621	CCGACUUGUAAACAAUGAAUUCAU	0.782	0.1
Cluster_134	24	1:702763-705490	2728	AGGAGACGUUGAGCGGUGGCCAGC	0.748	0.5
Cluster_135	24	1:705570-708142	2573	CUUUAAUUGCGCCAUGCGCGGCCC	0.745	0.1
Cluster_136	24	1:708224-710315	2092	UGACUUGGGCAAGAAGGCUAUCCU	0.738	0.1
Cluster_137	24	1:716985-717876	892	AUCUGUGUUUAUUAUUUGUGAAUC	0.466	0.3
Cluster_140	24	1:758582-758769	188	AGGCCCACUAAGGAAACCCUAACC	0.153	-1
Cluster_146	24	1:1011276-1011751	476	AUACGUUGGAUCCAACAUGGUUGU	0.518	0.3
Cluster_147	24	1:1016901-1017332	432	AUAAUGGACUGGUAUUUCCCUU	0.8	0
Cluster_150	24	1:1026702-1027018	317	AGAAAAUGGCGCGGACAUCUCGCU	0.699	0
Cluster_151	24	1:1031238-1031691	454	ACUCACCGAGCUGUAAAAGGAGGC	0.381	0.3
Cluster_153	24	1:1044058-1044810	753	AGACUGGCACAACCAUGCCCCCGC	0.404	0.3
Cluster_154	24	1:1055483-1056458	976	AAUUUCAGUGUGGAUGUAGACAUG	0.661	0.1
Cluster_155	24	1:1060264-1060335	72	CGCGAUGACUGAGAGGACCGCGCC	0.198	-1
Cluster_158	24	1:1072827-1073521	695	AUGCGUCAGCACACGAGAGGCAUC	0.67	0.1
Cluster_163	24	1:1198971-1199396	426	CCAAUGGACUUAGGACCCUGACGA	0.543	0.1
Cluster_164	24	1:1200214-1200921	708	AAGCCAGCUGCGGACGCAGGCAUC	0.66	0.1
Cluster_165	24	1:1201083-1201748	666	AGACGGCACUCCACGCAUCGUGCG	0.701	0.1
Cluster_167	24	1:1204050-1204565	516	GAAGAGGCAGACUUGCUGGACAGC	0.807	0.1
Cluster_168	24	1:1205001-1205222	222	AAUGGAUUGAAUCACCACACACCC	0.671	0
Cluster_169	24	1:1207205-1207404	200	UGCCCGUGCGUUGCUAUGGAACC	0.296	0.3
Cluster_170	24	1:1212969-1213222	254	CAUACCCGGAUUCCGAUAUGGCGC	0.778	0
Cluster_172	24	1:1218829-1220586	1758	AUGGCAGAACGAGAAAAGGCAGGC	0.57	0.2
Cluster_173	24	1:1220668-1220914	247	AGAGGACAGCAGUAGCAGCACAGC	0.469	0.4
Cluster_176	24	1:1226058-1227138	1081	GCAGGACAGCAGUAGCAGCACAGC	0.718	0.2
Cluster_177	24	1:1230072-1230394	323	ACGGACCGGCGUCAACUGUCCACU	0.636	0
Cluster_178	24	1:1236420-1237110	691	AAAUCCCGCGAUAAACUAGGAACU	0.318	0.7
Cluster_180	24	1:1259346-1260401	1056	GUACACAAGAAUUCUGUAAGGAGU	0.657	0.1
Cluster_181	24	1:1270820-1271384	565	ACCGACAAGGGCUUCGGAGGCACC	0.618	0.1
Cluster_183	24	1:1280074-1280278	205	UGGUUCAUGUUAGAUGCACGAGA	0.418	0.2
Cluster_185	24	1:1406637-1406754	118	UUCCCUUUCAUUAACGAACCGAGC	0.464	-1
Cluster_186	24	1:1410724-1410951	228	ACAGUUAGCAGACCGACAUGACGU	0.649	0.1
Cluster_187	24	1:1487508-1488008	501	AUCCGAUGCAGAGUAAUGAUUACC	0.611	0.1
Cluster_189	24	1:1491080-1492390	1311	CUCUUCGAUGUUAUCUCAGACAGC	0.224	2.9
Cluster_191	24	1:1505370-1505629	260	AUCCAACCCAGGACUUGGAGGUGC	0.405	-1
Cluster_192	24	1:1507826-1508963	1138	AAACCAGAUCACACGCGUAUUACC	0.833	0.1
Cluster_193	24	1:1509606-1510142	537	AGGACAGUGAUCAGAAUCUUCAGA	0.803	0
Cluster_194	24	1:1510258-1510917	660	AGAGGGCAGAGAAUUUAUAGCAUU	0.728	0.1
Cluster_195	24	1:1511000-1511385	386	AGAGAAACCCGGUGUUGAAGCUGC	0.804	0.1
Cluster_196	24	1:1511491-1511825	335	AGCAUCACUGAACUGAGUUGGGCC	0.538	0.1
Cluster_197	24	1:1511904-1513218	1315	UGCCUUAAUGGACAUGAACGGCCU	0.774	0.1
Cluster_198	24	1:1513970-1516569	2600	UUCUGCAUGGCACUCUGUCCGAGA	0.769	0.2
Cluster_199	24	1:1524792-1525810	1019	UCCCAUCCAUGGAGCCGGCGACCU	0.791	0
Cluster_201	24	1:1526656-1527406	751	CUGUUUCCCACCUUCCACGCC	0.764	0
Cluster_206	24	1:1533467-1534083	617	AGCUUGUCUCCAUGCGGUUGGGCC	0.76	0
Cluster_208	24	1:1538909-1539191	283	CACGGCCCGGCCCGUAAAUGCUU	0.496	0.1
Cluster_211	24	1:1541936-1542966	1031	AGAACGGCAGAACGGCAGAACGGC	0.415	0.3
Cluster_212	24	1:1608875-1609006	132	AUUUCCUAGAGUACAUGUACAACC	0.154	1.2
Cluster_213	24	1:1609623-1610540	918	AUCGGAGCAGUGAAAAGUGACACU	0.388	0.4
Cluster_214	24	1:1612786-1613297	512	AGAAGUGAGGAAGAGCAACAGACU	0.68	0.1
Cluster_216	24	1:1708607-1709005	399	ACUCGGUAACGUUAGGCACUCGGC	0.295	1.9
Cluster_218	24	1:1717663-1718241	579	AACUAUUGAAAGCCCAGGGCUCCC	0.544	0.2
Cluster_219	24	1:1720960-1721488	529	AAUUCGUGCCUGCUGUAUCGGCCC	0.528	0.3
Cluster_221	24	1:1737424-1737954	531	ACUGGCACUCGGCAAAGCUUGAUA	0.418	0.4
Cluster_222	24	1:1738031-1738616	586	AACGGGCUACCCGAACCCGAACCC	0.309	0.8
Cluster_224	24	1:1807256-1807743	488	AGGAUGAUGUAAUCUGGGAAAACC	0.462	0.1
Cluster_225	24	1:1808577-1808952	376	CCAUCAUAGUUGACUGGGAGACGA	0.52	0
Cluster_226	24	1:1810342-1811055	714	AAUUUUGAGAGACAACACUGAGAU	0.27	2.5
Cluster_227	24	1:1813557-1814041	485	AUGAAGCACCAGGUGACACUCGAC	0.532	0.2
Cluster_229	24	1:1815557-1815763	207	AUAUUACACCGUAUUGUGAUGCCC	0.465	0.1
Cluster_230	24	1:1819184-1819614	431	AAGUACUUUUUAUCGGGCACUCGG	0.43	0.3
Cluster_231	24	1:1828893-1829264	372	UUUAUCUCGUGGUUCGGUAAGAGU	0.586	0
Cluster_233	24	1:1837337-1837963	627	CACGACUGAUACAUGCACCGGCGC	0.565	0.2
Cluster_235	24	1:1840700-1841613	914	ACCGUGUAUUGUUGGAGAUAGCCU	0.458	0.4
Cluster_236	22	1:1841768-1842202	435	AUGACGGUGAGGACUCUGUGAA	0.63	-1
Cluster_237	22	1:1842442-1842544	103	CUUGCACGUCAGUCUGAUCCCA	0.106	-1
Cluster_238	24	1:1844560-1845736	1177	AGAAGCCGAUUGGACGCCACGAGC	0.48	0.6
Cluster_240	24	1:1846899-1847439	541	AUUAAUCGGCUGAGUUAUGGCAUU	0.692	0
Cluster_241	24	1:1851368-1851953	586	AGGCGUAAGAAGUUGUAGAGAACC	0.506	0.1
Cluster_242	24	1:1857179-1857864	686	AGGGCUACGACAACACAACAAACC	0.702	0
Cluster_243	24	1:1858278-1858529	252	GUAGGUCUCCGGCCUAGCCGAACU	0.529	0
Cluster_244	24	1:1858605-1859171	567	UCUAUAUAAGGAACUUGUACACCC	0.719	0
Cluster_245	24	1:1861346-1861637	292	ACGGGUUCAGGCACGAAAUUUGAC	0.466	0.1
Cluster_247	24	1:1917407-1917604	198	ACACAGUCGGUGGAUAACCGGAUC	0.396	0
Cluster_250	24	1:1935202-1935757	556	CGGAGCCCUGGGCUUAUUGUACCU	0.528	0.2
Cluster_251	24	1:1937632-1937839	208	ACGUGACCUGAUCGGCCUCCUGGC	0.413	0.2
Cluster_253	24	1:1943479-1943839	361	AAUUCGAUUCGAUCUAAGCUGACC	0.302	0.6
Cluster_256	24	1:1964109-1964914	806	ACCCGAACCACGAUCGAACGGCCA	0.504	0.1
Cluster_257	24	1:1969414-1969937	524	AGCAACGUCGAGGUAGAGCGUU	0.585	0.1
Cluster_258	22	1:2006367-2006516	150	UGUGAUGAAUAAAAUAACUUGG	0.522	-1
Cluster_259	22	1:2011053-2011321	269	CUAGCCAUUAGUCUGUCAGAGC	0.516	-1
Cluster_260	24	1:2018772-2019319	548	AAGAAACAGAUUUGUAAAAUUGCC	0.551	0.2
Cluster_265	24	1:2034650-2034938	289	ACACCGCUGCGGCCGUAGGGUGCC	0.347	1.5
Cluster_268	24	1:2098235-2098507	273	CAGAUCGGCUAGGCCAGGACCUGC	0.389	0.2
Cluster_273	24	1:2107766-2108051	286	CUGUGUUGUUAUGACGAAGGUACC	0.46	0.1
Cluster_274	24	1:2113670-2114203	534	GGUCUGUUUGGUUCGCUAGCUAAC	0.489	0.2
Cluster_275	22	1:2144305-2144707	403	AGAGGAAUGAAGAAAGAGAUAG	0.361	-1
Cluster_277	24	1:2156470-2156971	502	GUUAGGCUGUCUUCAACAAAGACC	0.431	0.2
Cluster_278	24	1:2171143-2173206	2064	AGUUCAUUCCUCAAACCAAACACC	0.53	2.2
Cluster_282	24	1:2231855-2232436	582	GUUUCGUCGAAACCGAAUGUGCC	0.312	4.1
Cluster_283	24	1:2233191-2234044	854	AGGACUCAACGACGCCUACACCCA	0.215	2.9
Cluster_285	24	1:2234995-2235377	383	CUUGAAUUGGCUGUAGUUGGUACC	0.23	2.7
Cluster_288	24	1:2238318-2238791	474	AGGACACUGUUGGACGUGUAGAGG	0.479	0.2
Cluster_290	24	1:2241572-2242029	458	AUAGAUAUUGGCUUGGCGGAUCCC	0.493	0.3
Cluster_292	24	1:2263294-2263707	414	ACCGACUUUGCACCUGAGGGGUCU	0.389	0.1
Cluster_293	24	1:2267690-2267964	275	AUUGACUUCGCCCUGGCAACACGA	0.594	0
Cluster_295	24	1:2282951-2284599	1649	UCAUCGGCCCACGGCACGACCCAC	0.422	1.4
Cluster_296	24	1:2288138-2288563	426	UUGAUACCAAUUGUUGGAACCCGA	0.476	0
Cluster_297	24	1:2297140-2297434	295	AGAUUGAAAAUAACCGAACAAGCC	0.585	0.1
Cluster_300	24	1:2383275-2383618	344	UCUUAAUUGAGAGACAGAGCUCCU	0.8	0.1
Cluster_304	24	1:2429035-2429323	289	AACUAAAUGAGCCUACAAUGCACC	0.27	0.2
Cluster_305	24	1:2463298-2464066	769	UUUAGUCAAAAGACCGAGAAAGAU	0.631	0.1
Cluster_307	24	1:2469866-2470876	1011	AAUCGUGUCGUGCUCGUGUCAGCC	0.409	0.8
Cluster_308	24	1:2471475-2472195	721	AACGGUCAAUGACGUGGCUCAGCC	0.612	0.2
Cluster_310	24	1:2483300-2484829	1530	CUUUGCCGAGUGUUGUCCGGAACC	0.297	1.8
Cluster_311	24	1:2486207-2486436	230	ACUGGCCCCUAGCACUGGCGGAAC	0.469	0.1
Cluster_313	24	1:2566154-2567025	872	ACGGACCAUCUAGGCCUCCAUAGA	0.311	0.7
Cluster_314	24	1:2591542-2591847	306	AAUUUUGGACCCGAUACUCGGCGC	0.443	0.4
Cluster_316	24	1:2628075-2628481	407	AUCGCCACGUCAGAGCUCGGCGCC	0.416	0.2
Cluster_317	24	1:2636435-2636973	539	AAUUAUCGUGGUAUUAUAGGUUCC	0.45	0.6
Cluster_319	24	1:2731468-2731688	221	CCUUAACACGGGACGCUGGGUACC	0.359	0.3
Cluster_320	24	1:2732521-2732940	420	UCUACCCGUGGGUCUGUUAUUGGU	0.565	0
Cluster_322	24	1:2745375-2746368	994	ACCGGACUGUCCGAGAUGACUCGC	0.409	1.2
Cluster_324	24	1:2749389-2749851	463	UCAUCCAUGAACCGGAUUGGACCC	0.559	0.1
Cluster_325	24	1:2750330-2751119	790	ACUGGGCACCGAGAGGACUGGGUC	0.324	1.5
Cluster_328	24	1:2773629-2773884	256	UUUACCCGAAACCACUUAAAGCAG	0.45	0
Cluster_329	24	1:2777630-2777958	329	CUCGCUAGCUGAAGGAGAACGAGC	0.673	0.1
Cluster_331	24	1:2783867-2784086	220	AUUGUUUGAGCUUUCUUGGCCCGA	0.426	-1
Cluster_334	24	1:2813893-2814590	698	GAAGAAAUUGACGUCAACUGUAUU	0.552	0.1
Cluster_335	24	1:2816681-2816913	233	GGAGACAAUCUUAGUACUAGCAUC	0.376	0.2
Cluster_337	24	1:2830020-2830625	606	AAUUUUUUUCCAAUCUCAUCCAAU	0.448	0.1
Cluster_339	24	1:2872099-2873913	1815	GGCUGGACCUGAGCAGCUGGCUGG	0.659	0.3
Cluster_341	24	1:2875021-2875303	283	AAUAUAUAGAGACACAUGAAACCC	0.4	-1
Cluster_342	24	1:2883960-2884246	287	UGAGAAGAUGAUGGACUAGCCCAU	0.559	0
Cluster_343	24	1:2889378-2889861	484	ACCUAUCUGACUCGCUAAACUAUC	0.5	0
Cluster_344	24	1:2892571-2893916	1346	ACCUUCGUGGUGAUGUCACUCGUG	0.479	0.7
Cluster_346	24	1:2897494-2898174	681	AAAGUCAGCUGUUUGGACUGCUGC	0.513	0.3
Cluster_347	24	1:2900401-2900874	474	CCUAAACACGGCUGGUAAGCACCA	0.5	0.1
Cluster_348	24	1:2913919-2914161	243	ACCGGACACUGUACGGUGCACACC	0.184	-1
Cluster_349	24	1:2933455-2933858	404	CACUCGAGUGUAAAUUAUUAACGU	0.331	0.4
Cluster_352	24	1:2983735-2984020	286	UGAUCUUCUCCCUGCGCACAACCC	0.833	0
Cluster_353	24	1:2984348-2984616	269	CCAGUCCACGCCACUGUACGAGA	0.729	0
Cluster_355	24	1:2988651-2989346	696	CCAAUCUGGUAUCAGAGCACUCGA	0.767	0.3
Cluster_356	24	1:2989451-2990177	727	AAGUAUAACUAUCUGGAUAGAGCU	0.678	0
Cluster_357	24	1:2997240-2998522	1283	ACUUGUAGGUAUGGAUUUAACAUC	0.501	0.5
Cluster_358	24	1:2999371-2999716	346	AACGGCUCAGAGUCCAGACGAUGU	0.299	0.5
Cluster_359	24	1:3000001-3000650	650	CAAUACACAUGGAUUGGAUGUGAU	0.671	0.1
Cluster_361	24	1:3030556-3031296	741	AUACUUCACGGUGUUAGGGUUCAC	0.688	0
Cluster_362	24	1:3031420-3031884	465	CUAGUAUGCUAUAUUGGUGACAGC	0.222	0.9
Cluster_363	24	1:3039356-3040072	717	AAGGCGAGGUCAAGCCAAUGAGAA	0.619	0.1
Cluster_367	24	1:3051345-3051498	154	UUUUUAUUUGUCGCUAGAUAGUGU	0.686	0.1
Cluster_368	24	1:3053129-3053477	349	ACUCAACACGAACCGUAGCGGUGC	0.421	0.1
Cluster_369	24	1:3053571-3053759	189	CAAAUUGAGCACCGGACGGUCCGC	0.463	0.3
Cluster_371	22	1:3057531-3057870	340	UGACGUAAUCAAGCCCAAAGAC	0.429	-1
Cluster_374	24	1:3094620-3094983	364	GGUGGAGAAUACCAAUAGUACUGU	0.4	0.1
Cluster_375	24	1:3096181-3096350	170	AAAUACUAUUUCAUAUUAUGGACC	0.47	0.1
Cluster_377	24	1:3103170-3103852	683	AGGUCUGAUGGGCGCGAUUAAGGU	0.617	0
Cluster_379	24	1:3112103-3112920	818	UGUGGCUGAACGCAAACAUCGU	0.842	0
Cluster_380	24	1:3113650-3114208	559	CAACACACUGUGAGGAUUACCACC	0.735	0.1
Cluster_381	24	1:3114457-3115369	913	AGAGAACGACGGGAGAACGGCGCC	0.653	0.5
Cluster_382	24	1:3116390-3117620	1231	ACGGAGCAUCCGUAGCCCCAGACC	0.639	0.3
Cluster_384	24	1:3136815-3137653	839	GAAAGUCUCGUCGAAGUCGACGCC	0.393	2.4
Cluster_385	24	1:3138008-3138416	409	GCCGUGCCGGGCCGUGUUUGGACC	0.408	0.2
Cluster_386	24	1:3139889-3140044	156	CUUGGCACCAGACUGUAUGAUGAC	0.368	-1
Cluster_387	24	1:3143300-3143809	510	AGAGUACGGAUGCUCCAGACAGCC	0.515	0.3
Cluster_388	24	1:3146295-3146744	450	ACAUCCGAGAACAGAAUUUCGUGC	0.384	0.4
Cluster_392	24	1:3163708-3164121	414	UGAGGUAGUGAACCAAACAGGCCC	0.373	0.3
Cluster_395	24	1:3170184-3170682	499	GAAGAAGUGACAAAACUGAGCAUA	0.602	0
Cluster_396	24	1:3223341-3224232	892	AUUUGAACGGCUAACCUUAGGCAC	0.425	0.1
Cluster_397	24	1:3234247-3235302	1056	ACCACCAGACAGUUCGGUGCACCC	0.612	0.1
Cluster_399	24	1:3256450-3256892	443	CGAGAACGUGCAUGGCCCCUACCC	0.554	0.2
Cluster_401	24	1:3258626-3259020	395	UGGGACAAUAGUUAGACGAGACCC	0.593	0.3
Cluster_402	24	1:3270050-3270717	668	CAUUAAGAUAACGAGAUGACUCGA	0.337	0.9
Cluster_404	24	1:3275904-3276938	1035	ACAGAACGACCUAGAAUUCGAGGU	0.738	0
Cluster_405	24	1:3278145-3278580	436	ACGAAACCCGCGGAUAUCCAUACC	0.325	0.4
Cluster_413	22	1:3325800-3326050	251	GAGGAUAGUGACCAGAGCCGGA	0.298	-1
Cluster_414	22	1:3326377-3327174	798	CUUUGAGAGGAGACCAGGAAGC	0.833	-1
Cluster_418	24	1:3367295-3368274	980	CACCUUCCACCACUACAUCCCACC	0.187	5.9
Cluster_419	24	1:3375293-3375921	629	UUAACGAGCCAGCUCGAGUCGAGC	0.623	0
Cluster_421	24	1:3438451-3438860	410	AGAGGAACAUCAGGCACUGAGAUC	0.488	0.2
Cluster_422	24	1:3439569-3439885	317	AGAGAUAGACUCUUCGCGAAGAGC	0.5	0.6
Cluster_424	24	1:3477223-3477962	740	UCUCAAACCUGCACCUUAACUCGU	0.461	0.3
Cluster_425	24	1:3479874-3480814	941	AUCCAACGACUAAUAAAAAGAAAC	0.447	0.5
Cluster_426	24	1:3497940-3498531	592	AUAGGACAAUUUGCUGGAGAUGCU	0.548	0.1
Cluster_427	24	1:3499354-3500493	1140	ACACCCGAACCGAGUGCAAACUCU	0.512	0.3
Cluster_429	24	1:3529640-3531594	1955	AAAAAGCUGAGCGUUUGGCAGUCC	0.493	0.8
Cluster_430	24	1:3533725-3534127	403	CAUCGGCCCGCCGUGCAUUAGACC	0.527	0.1
Cluster_431	24	1:3534431-3534764	334	AAACUUAGGCACGAUGGACGACAC	0.542	0
Cluster_432	24	1:3537899-3538470	572	UAUGACAAUUGAGGUAACGAACC	0.54	0
Cluster_434	24	1:3540239-3540368	130	AAUCCCCUCCGGGUUUGAGGCUCC	0.312	0.3
Cluster_435	24	1:3542014-3542294	281	AAUGCCCUUUAUUACUCUAGCUCU	0.416	0.1
Cluster_436	24	1:3550424-3551466	1043	AAUGGACAUUUAUACCCUUACACC	0.539	0.5
Cluster_439	24	1:3554464-3555703	1240	AAUUAGACGAGCGCUACGAAUACC	0.552	0.2
Cluster_440	24	1:3558337-3559545	1209	UCGGAGUCAUUUUUAUAGAGAGGA	0.286	3.1
Cluster_441	24	1:3570462-3571551	1090	AUUAUCGGUUCAGACCGAACGCCC	0.526	0.2
Cluster_442	24	1:3571660-3572062	403	AACCUUAGGCAAAGUGUGACACAU	0.548	0.1
Cluster_443	24	1:3576029-3576198	170	AGCACACGACCUGUUAGAAGGAGC	0.514	0.1
Cluster_447	24	1:3650039-3650511	473	AGUGUGCUUCUGUGCGAACGAGGA	0.5	0.1
Cluster_448	24	1:3690417-3690493	77	GACAGACAUGAGAAUGAGAACGGU	0.538	0
Cluster_449	24	1:3696233-3696374	142	AAGGCUGUUAGACCCUGAUCAGUC	0.269	0.5
Cluster_450	24	1:3745220-3745823	604	AUUAUUUGGAUCAUCCCUUAUCCC	0.617	0.1
Cluster_451	24	1:3770258-3771537	1280	GCUGACGUGGCACGUGAGUGAGAU	0.417	0.5
Cluster_453	24	1:3782883-3783305	423	GAGCGGCGAUGGACAUGAACAGCU	0.661	0.2
Cluster_455	24	1:3797346-3797795	450	AAUGUCUCUAGAACCAAACAUAGA	0.56	0.1
Cluster_456	24	1:3803574-3804235	662	CCUCUGUCUGACAGUGGUGUUGGC	0.6	0.1
Cluster_457	24	1:3804733-3804967	235	AACGAGCUGAGCCGAGGUAGCUUG	0.342	0
Cluster_458	24	1:3810399-3810556	158	AGAAUCAGGAACUGGAGCUGUGCC	0.342	0.4
Cluster_459	24	1:3812549-3813341	793	AGACAUGGACAUCUGGAGACGACA	0.647	0.1
Cluster_462	24	1:3841941-3842274	334	GCACAACUUAUAGCACACUCUUCU	0.735	0.1
Cluster_463	24	1:3843433-3844267	835	GAUAUAGAUAUUAAAUAUUGGACC	0.541	0.5
Cluster_464	24	1:3852449-3852833	385	AACUAAAACAGGUGUGAGAUUCGA	0.502	0.1
Cluster_465	24	1:3854711-3855124	414	AAUUUUAGGAACAACUCUCCAACC	0.404	0.1
Cluster_466	24	1:3855937-3857205	1269	ACCUUACUGUCGUUGAACCCGGGA	0.483	1
Cluster_467	24	1:3858218-3859108	891	GAACGAAGUGGCAUAAGCUCUGCC	0.344	0.9
Cluster_469	24	1:3917218-3917846	629	AGGACGUCCUCUAUUUCCUCCAGC	0.506	0.2
Cluster_470	24	1:3917947-3918875	929	AAUGUGAACCAUGUACGUGCCAGA	0.529	0.5
Cluster_471	24	1:3918992-3919198	207	AUGGGUUUUACCCGAUAUGAAGGC	0.559	0
Cluster_472	24	1:3956200-3956941	742	GAAGCAUGUCACGUAGGACAGUU	0.387	0.6
Cluster_473	24	1:3957452-3957992	541	CCGGAUUUGAGGGGAAGUUCCACU	0.701	0.1
Cluster_474	24	1:3958707-3959046	340	AUCUGAAGUCCCAAAAAUACAAUU	0.495	0.1
Cluster_475	24	1:3969946-3970125	180	AAGCAGUUGUUGGCAUGCUCACGU	0.45	0
Cluster_476	24	1:3970230-3970774	545	AUAAACAUAGACAACAUGCAUACC	0.573	0.1
Cluster_477	24	1:3972611-3972693	83	AUGGAGGAAUUACUAGACACUACC	0.418	0.1
Cluster_478	24	1:3973156-3974119	964	ACACUAACUGUACACUUGCACUAG	0.597	0.2
Cluster_479	24	1:3978921-3979698	778	AGGCUUCUGAGUAGCACCUCCAAG	0.667	0
Cluster_482	24	1:3985193-3985512	320	AUCAUAUUGAUUCCGUAGCAAAGC	0.414	0.4
Cluster_483	24	1:4040218-4040920	703	AACCAUGUGGUUGUGGGUUCAAGC	0.684	0.2
Cluster_484	24	1:4109299-4109594	296	AUGCAUCAAAUGGACCGACCAUGC	0.631	0
Cluster_486	24	1:4129496-4129829	334	ACACAUAUAUGAGCUUUUGAGAUU	0.506	0.1
Cluster_488	24	1:4138328-4139079	752	AGUGACACGCUAGAUCUAGGGGGA	0.505	0.3
Cluster_491	24	1:4150289-4150520	232	AAUGAUACUUAGAUUCUCUACACA	0.522	0.1
Cluster_492	24	1:4198556-4198763	208	ACUGUCGGCCCACACAUGGACACC	0.331	0.7
Cluster_493	24	1:4212652-4213203	552	ACCCGAGUCGUGGUGCUCGUCGCC	0.515	0.1
Cluster_494	24	1:4214436-4214566	131	AUCGCCCCACCUGAAAUUUUGUCC	0.426	0.1
Cluster_495	24	1:4215865-4216359	495	AAUGGACAAGUUGAGAAUAAGUGU	0.697	0
Cluster_497	24	1:4225983-4226320	338	AGAAGCGCCUAAGACCGAGUACUC	0.712	0
Cluster_498	24	1:4226452-4226752	301	AAGUCGAGCAGAGCAUAUCCAAGA	0.689	0.1
Cluster_499	24	1:4226976-4227942	967	CGGGCGCCCGGACUGUCCAGAAGC	0.707	0.1
Cluster_504	24	1:4231818-4232591	774	ACCAGUGCGGCGACUCGAGGCACC	0.655	0.1
Cluster_505	24	1:4232670-4234674	2005	CCUCAGACCAGUAGAAGGGAGACC	0.674	0.4
Cluster_507	24	1:4239249-4239928	680	GUAGAACUAAAACCGAAGACAUGA	0.75	0
Cluster_508	24	1:4240032-4242745	2714	ACGUGAUAGGCUAGGAGUAGCACC	0.722	0.2
Cluster_510	24	1:4243753-4244112	360	UGGUUUUUUGGCACCUGGCACUCA	0.705	0
Cluster_511	24	1:4246536-4247050	515	CAAACCCGAAAUUCGGCACUGAGG	0.72	0.1
Cluster_512	24	1:4250303-4251498	1196	UACCUGGAGGUGCUACUCGGAAGC	0.733	0.2
Cluster_513	24	1:4253096-4253677	582	AUAUGAAAACCGUAGCAACGCACG	0.282	-1
Cluster_514	24	1:4255208-4256921	1714	AUAGAGUUUGACACUGGAGGCAUC	0.71	0.1
Cluster_515	24	1:4257856-4259297	1442	AAACACUCCGAGAACCCUUUGUUU	0.782	0.1
Cluster_516	24	1:4259392-4262188	2797	AGAGAUGGGAUCGAUGACUGCACC	0.677	0.4
Cluster_518	24	1:4266115-4266683	569	AGAGAAGUGUCUGACUUGGCCUCC	0.743	0.1
Cluster_520	24	1:4268832-4269815	984	CGCAGUCGAGGAAGACGAGGACCC	0.871	0
Cluster_522	24	1:4270955-4273315	2361	GAGCAGGUAGGAGAAUUCUAGUGC	0.737	0.2
Cluster_523	24	1:4275481-4276494	1014	GCCGCCGCCAGGGAUUUCUAGUC	0.694	0.2
Cluster_525	24	1:4276964-4278361	1398	GCACAUCUCGGGGUAUCCUCUCGU	0.688	0.1
Cluster_527	24	1:4278749-4280659	1911	CACAAAAAAUCGUAACCCGAGAGC	0.702	0.2
Cluster_530	24	1:4283691-4285802	2112	UGUAAUGACAAGAUUCGAAUUAUA	0.712	0.1
Cluster_532	24	1:4286564-4287653	1090	CUAGGUGACAAAUAGAUCUGCCCU	0.623	0.1
Cluster_533	24	1:4287729-4288838	1110	UCUUGGUUCAGUCAUUCUAGAC	0.696	0.1
Cluster_537	24	1:4294453-4294768	316	AAAUACGGAAACAAAAACUCUAUU	0.4	0.1
Cluster_539	24	1:4299131-4299263	133	GAACCCGUUUGGCACGAAACACGA	0.303	-1
Cluster_540	24	1:4317476-4317948	473	AGCCCGCCUUCGGACCGUGCUAGU	0.17	2.1
Cluster_541	24	1:4320316-4320940	625	GAAAGAACAGGGGAAGGCAGAACC	0.586	0.1
Cluster_544	24	1:4343160-4343427	268	AUUGUUUGAAUUUCGGGUCGGCCC	0.53	0.1
Cluster_545	24	1:4348316-4348520	205	AUCUCGCACUAUCGGAAUCCGACU	0.481	0.1
Cluster_547	24	1:4364050-4364318	269	GUGGCACCGACAUGGAACCGAGCU	0.384	0.2
Cluster_549	24	1:4398305-4399412	1108	UGAUUGCAACUCAAUGGUACGUAU	0.773	0
Cluster_550	24	1:4404427-4405097	671	UCGAUGGGCAGGAACACCGGCC	0.522	0.2
Cluster_553	24	1:4408856-4409223	368	GAGAUAAGGAAAGACGUGCUCUUC	0.468	0.3
Cluster_554	24	1:4409299-4409688	390	CGCCACCGGUUCUUGUUGAGUGUU	0.154	2.1
Cluster_555	24	1:4414127-4414411	285	CUGUCUUAAACGGACUGUGCUCGU	0.252	1.2
Cluster_556	24	1:4414663-4414929	267	AAUUUCGGGCCGCCUAAAAUGAGC	0.421	0.4
Cluster_557	24	1:4415066-4415313	248	UUCCCAAAUCGAUGGGAUCGAGAA	0.42	0.2
Cluster_559	24	1:4426090-4426247	158	AGGAGAGAGGACUGCUGCUGUGCU	0.378	-1
Cluster_562	24	1:4494671-4494954	284	AUACGCACUGACCAUCCCGCUUCC	0.175	0.5
Cluster_563	24	1:4500533-4501378	846	GAUGUCAGCCUAGGCACGACCUGC	0.222	1.6
Cluster_565	24	1:4531901-4532353	453	GUGCCUGUCGUACCGGGUUGAUGC	0.343	0.4
Cluster_566	24	1:4532630-4532959	330	AUUUGACGAGCUGUCGACGGAGCC	0.593	0
Cluster_567	24	1:4541307-4541730	424	ACGUGGUAGAUGCCUCAUGCAGCC	0.713	0
Cluster_570	24	1:4588513-4588793	281	GUUGGCGCGGACGAGAUGGCGAGC	0.242	0.3
Cluster_571	24	1:4588909-4589321	413	ACUCAAGGACGGCUCUGCAGCGCC	0.485	0.1
Cluster_574	24	1:4667545-4667968	424	UAUGCAUGAUUUGCUGAACACGGU	0.644	0
Cluster_575	24	1:4668332-4668510	179	AAACACUGUUUUGCACUGUACACU	0.321	-1
Cluster_576	24	1:4671422-4671912	491	ACUUCGAUUAAGAGUGUCGGCCCC	0.217	0.9
Cluster_578	24	1:4710019-4710436	418	ACAUAACUUAUACUCUAAUACACC	0.641	0.1
Cluster_579	24	1:4710929-4711098	170	AGUAGACCUAGAAAUUACUGCUCC	0.358	0.1
Cluster_582	24	1:4713510-4714030	521	AUUGCCCUGCACUGAUUGUAUACC	0.661	0.1
Cluster_583	24	1:4714339-4714856	518	CUCCAGCAACAACCGGUAAAACGU	0.423	0.2
Cluster_584	24	1:4720792-4721117	326	AUUUUACCGUGCCGGGCUCGGACC	0.098	-1
Cluster_585	24	1:4733368-4734110	743	ACCUUGAGGGUCGGCUCUGAUACC	0.791	0
Cluster_586	20	1:4736391-4736439	49	UUUAUCACCGCCUCUUUCUC	0.063	-1
Cluster_587	23	1:4736593-4736641	49	AAAGAGUAGCGUUGAUACACCGU	0.086	-1
Cluster_588	24	1:4737568-4738255	688	AUCGUUGCAACGCACGGGCACCUA	0.214	1.5
Cluster_589	24	1:4746421-4747648	1228	AUUAUACAGUAUAGAAAACCUAUC	0.552	0.2
Cluster_590	24	1:4747964-4748873	910	GCCUGACCGAGCCCGAGAGCGACC	0.443	0.1
Cluster_594	24	1:4832125-4832699	575	ACUAAAAUUUAGCCGGUGGAACCC	0.278	1.5
Cluster_595	24	1:4835978-4836648	671	AGAAGAAAGUAUAACAUGAUAAAA	0.667	0.1
Cluster_596	24	1:4837682-4838916	1235	GUUGCCCUGGAACCUGAGCACUGC	0.659	0.1
Cluster_599	24	1:4844530-4845264	735	ACACGGCCGGUAGAAUAUUUAACC	0.369	1.1
Cluster_600	24	1:4846089-4846572	484	CGUUGCAACGCACGGGCACCUAAC	0.307	1.3
Cluster_603	24	1:4883602-4884101	500	ACCGAGCGCAGAACUUUGCCGAGU	0.261	3.3
Cluster_604	24	1:4887848-4888179	332	GUUUAAUAUGGAGGCUCUUAAGGU	0.628	0.2
Cluster_605	24	1:4890201-4890771	571	GAUGCCGUUGCAGCCGUAGAGAGC	0.673	0.2
Cluster_606	24	1:4896262-4896786	525	UUUUAACUUAGACUUUUAGAGACC	0.508	0.1
Cluster_607	24	1:4903445-4903489	45	CCUCGGGAAUUUCAGAGGAACUGA	0.51	-1
Cluster_612	24	1:4917205-4917785	581	AGAGAGUGCCGCUAUAUAUGAACC	0.44	0.4
Cluster_614	24	1:4919248-4919653	406	AAGGCAGGUCCCGUCGGAAGUAAC	0.632	0.2
Cluster_616	24	1:4923100-4923613	514	CAUACUAUUUGUUCGGACGACGCU	0.572	0.1
Cluster_617	24	1:4924061-4924802	742	AUCGACCGUAGGAGUUCAAUCGGU	0.27	1.1
Cluster_618	24	1:4925145-4925790	646	GGAAUGAACUCAUGAUACACCACC	0.432	0.1
Cluster_619	24	1:4926232-4927253	1022	AACACGACUUAUGAAUAAAGAUGU	0.251	5
Cluster_621	24	1:4936616-4937183	568	AUUCACCCCCCUAGACACACUCUA	0.456	0.3
Cluster_624	24	1:4966983-4967649	667	AUUAUUAUGGUCUACUGUGAUACC	0.432	1
Cluster_625	24	1:4968205-4968899	695	AAUAAACUAAACGAUCUAACGAGC	0.419	0.2
Cluster_628	24	1:4978066-4978816	751	CUCGGUAACCCAUGAAGAUGCACC	0.285	0.6
Cluster_629	24	1:4980920-4982805	1886	UUUUCUGGGCACUGAAAAAGGAGA	0.738	0.1
Cluster_630	24	1:4983027-4983897	871	UUGGAUGGGUGUCCGACCAGGAAU	0.786	0.1
Cluster_632	24	1:4985884-4987683	1800	CUGUCACCUACUUGACAACCGAGC	0.738	0.1
Cluster_633	24	1:4987919-4989318	1400	GCACAGGCGCUACCGAUACACGCU	0.811	0
Cluster_639	24	1:5012352-5012794	443	CACGUCAAUCCAGAUCACACCGGC	0.443	0.1
Cluster_640	24	1:5013059-5013533	475	AUCGGCUCAAACAGCACACGCGC	0.582	0.1
Cluster_641	24	1:5014185-5015198	1014	AUAAACUGUGGCAAGUUAGACAGC	0.648	0.1
Cluster_642	24	1:5015889-5016316	428	CGCCUAACCUUAGGCACCUUAGAC	0.256	-1
Cluster_645	24	1:5091112-5091751	640	AUUCAAAUGGAUGAUAAUGAAUCU	0.463	0.4
Cluster_646	24	1:5093433-5093734	302	AGGACCUCUAUUUGAAACCUUGUC	0.429	0.3
Cluster_647	24	1:5094076-5094319	244	AACAGUUUGUAGCAUGCACAUAUC	0.528	0
Cluster_648	24	1:5098927-5099843	917	AUCAACUCACUAGAUAUAGUUAUC	0.709	0
Cluster_649	24	1:5100757-5101493	737	AGAUUUUUAGGUAUGACUCUAGCC	0.197	-1
Cluster_650	24	1:5104834-5106881	2048	AAACAAACAGGAACUUUGACUGCC	0.277	7.7
Cluster_651	24	1:5112928-5113228	301	CCAAAUCUAGAUAAUAGGGCAGCC	0.468	0
Cluster_652	24	1:5118048-5119168	1121	ACUGUCCGAGCCGACGAGGACGCC	0.502	0.6
Cluster_654	24	1:5128174-5129833	1660	AAAAACACUCGGCAAAAACUUUGC	0.489	0.4
Cluster_655	24	1:5129970-5130362	393	AUUUCAGAUUACGUCUAUUCACCC	0.375	0.4
Cluster_656	24	1:5130959-5131171	213	AGCGUACUGUGCCGAGUGUCAGCC	0.186	3.1
Cluster_657	24	1:5131559-5132401	843	ACCGAGAGCAGGACACUUGGCACA	0.512	0.3
Cluster_659	24	1:5133828-5134600	773	GUUCACGAAUGGCAUGAGAACAAA	0.729	0
Cluster_660	24	1:5134771-5135935	1165	GUCUCAAGGAAUCUGUAUGGCGCC	0.221	7.1
Cluster_661	24	1:5136887-5137875	989	ACCGGAACAAGUACUCAUUUGGUC	0.447	2
Cluster_663	24	1:5138392-5138715	324	CAACCCAUCUGGGCAGAGACACGC	0.407	0.2
Cluster_664	24	1:5139346-5140647	1302	AGAUCUCGCUCCCGGUAGGGACCC	0.592	0.2
Cluster_665	24	1:5141142-5141386	245	AGGGUACUGACUUCAAACCUGGCC	0.175	2.1
Cluster_667	24	1:5143161-5143630	470	ACUGUCGCACCCCUUGGAUUGAUC	0.281	0.7
Cluster_671	24	1:5158263-5159019	757	AAAUAACGGUUCUGUCAUUUUGUC	0.23	5
Cluster_672	24	1:5162884-5163777	894	AGCCUCGGCUGUGUAAUCUUAACC	0.507	0.2
Cluster_673	24	1:5166885-5167649	765	AUGGUGGAGGAGAAUUCAUGCGCC	0.593	0.2
Cluster_674	24	1:5167838-5168307	470	GAAACUCUGUUCCGGUAGUGACAC	0.376	0.2
Cluster_675	24	1:5171026-5171332	307	AGUCUGGCUUCAGAGAUACAACCC	0.258	0.4
Cluster_677	24	1:5174333-5174939	607	CAUUUUGGUGGAGCGAGAGCACUC	0.452	0.5
Cluster_678	24	1:5176033-5176470	438	AUUCUUGACUUAAUCGCACCCAUC	0.539	0.1
Cluster_679	24	1:5202272-5202559	288	AUCCUUUGGCACUUGGUAAAGAGC	0.473	0.2
Cluster_680	24	1:5306922-5307722	801	AAGACUCAAACUUGGAACCCGUU	0.232	1.4
Cluster_681	24	1:5309788-5310022	235	CGGAGAAAGAAGUUCAGCCGGAGC	0.609	0.1
Cluster_685	24	1:5426106-5426563	458	UCUCAUCUGAAUUGGACUUGACAU	0.379	0
Cluster_686	24	1:5426700-5427578	879	AUUUCUUGAACCAAACAGCACCUU	0.527	0.4
Cluster_687	24	1:5429665-5429789	125	AGAGUGGUGCAGCUCUGUCCUACC	0.347	-1
Cluster_690	24	1:5462620-5463531	912	AAUCCGGUAGAAACGAACAAGGCC	0.459	0.3
Cluster_691	24	1:5467599-5469217	1619	AGCGAGAGUCCCCCAGAUCAAGG	0.387	0.8
Cluster_693	24	1:5479474-5480816	1343	UCCCGUCGAGCAACUGAACAAGGU	0.453	0.6
Cluster_697	24	1:5487370-5487674	305	AAUAGAAGUAUGAAAUAUAGACCC	0.312	0.3
Cluster_699	24	1:5489076-5490555	1480	AUAUUCUGGAACGGAGGGAGUACC	0.457	0.6
Cluster_703	24	1:5514832-5515899	1068	GCCGUGGACCGUCCGCGUCUGACC	0.664	0.2
Cluster_704	24	1:5517811-5517972	162	AAACAGACCGUGCCGGGCUAGCCC	0.434	0.1
Cluster_706	24	1:5523513-5523776	264	GGAGAUGUCGUGAAGUAGAAUAGU	0.671	0
Cluster_707	24	1:5524404-5524591	188	CAAUUAAAACGAAACGGAGAGAGU	0.429	-1
Cluster_708	24	1:5526864-5527019	156	AGAGAAACAAUUCGGUUAGAAAUU	0.396	0.1
Cluster_709	24	1:5527346-5528302	957	AUAGGUCACAUUGUUGGAGAUGCU	0.597	0.3
Cluster_710	24	1:5536336-5536926	591	CAACCCUUCAGGAUUCCACGGAGC	0.475	0.1
Cluster_711	24	1:5541455-5541746	292	GCCGGCCCGGGCCCACAUAGAACC	0.653	0
Cluster_713	24	1:5591258-5591621	364	AUACUUUAGUCAUGACAAUACCGU	0.583	0.1
Cluster_714	24	1:5593621-5593903	283	AUCGAAACAAUUUCUAGUGGCAUU	0.622	0
Cluster_715	24	1:5598944-5599179	236	ACUGUUGGAGUGGACACACUAAUC	0.43	0.1
Cluster_717	24	1:5605734-5605918	185	AGAGACUAUAUUGUACAAUGGAGU	0.217	0.5
Cluster_718	24	1:5615297-5615642	346	AAGGAACGCGAUCUCGCCCCACCC	0.383	0.1
Cluster_719	24	1:5639865-5640071	207	GCAUUUGACUUGUGGAUGCAUAGG	0.331	0.1
Cluster_720	24	1:5643479-5643860	382	AAGGCUGCCCUGGUCUGACGCACC	0.463	0
Cluster_721	24	1:5654628-5655208	581	AUCUUAUACAGAGUACCGUGCAUC	0.495	0.2
Cluster_724	24	1:5661331-5661826	496	GCAUGCGUGGAGUAGAACACGGCC	0.328	0.6
Cluster_725	24	1:5664151-5664744	594	CCUUGUUGGAGGCGUAGGGGACCU	0.611	0.1
Cluster_726	24	1:5677915-5678563	649	ACUGUAGCUUUAGGGGACGGAAUU	0.486	0.2
Cluster_727	24	1:5679335-5679893	559	AUUCCUCACCGGGUUAUAGCAUCC	0.561	0.8
Cluster_728	24	1:5694054-5694973	920	ACUUGUCUGCUCUCACAAACACCC	0.493	0.8
Cluster_729	24	1:5695306-5695781	476	AACCAGUUUAGGGCACGACUUAUU	0.259	3.8
Cluster_730	24	1:5695879-5696279	401	GUAUGAGUUUGGGCAAGUAAUACC	0.628	0.1
Cluster_731	24	1:5696480-5697002	523	ACCGCUGCAGCCGUAGAGUGCCCC	0.372	0.5
Cluster_734	24	1:5719332-5719665	334	AUGGUACCCGUUCGAUGGCUCGGC	0.409	0.2
Cluster_735	24	1:5720166-5721416	1251	AUGACUGUGAGGCGUGAGUUUAGC	0.494	0.2
Cluster_736	24	1:5721865-5722767	903	AGUGGCACUCGACAAAGUCUUUGU	0.308	0.7
Cluster_737	24	1:5727810-5728589	780	CGAGCGACCCAACAAGGCAGGACC	0.597	0.1
Cluster_738	24	1:5728874-5729522	649	ACUAGUCACUUAUUGAUGGGCUCC	0.42	0.5
Cluster_739	22	1:5760291-5761070	780	AUAGUGACCAGAGCCGGACGGCC	0.089	-1
Cluster_741	22	1:5761651-5762280	630	UCAUUUUGUCCAAGAAACACCC	0.055	-1
Cluster_742	24	1:5762403-5763061	659	AAGCUCAACUGGCUUGGCUAGC	0.515	0.2
Cluster_744	22	1:5765866-5766069	204	UGAUUGAUGUGGAACGCCAUGU	0.5	-1
Cluster_745	24	1:5774577-5775291	715	AUCCUACCCGAUCCGAACCCGACC	0.626	0
Cluster_747	24	1:5790591-5791173	583	AGUAUAUGGAUACAGAUAUAGAUC	0.568	0.1
Cluster_748	24	1:5794078-5796054	1977	ACAAGCUGACUUCGGACGGCUCCC	0.52	0.4
Cluster_751	24	1:5798060-5799494	1435	CUCCGCCGGUCACCCAUGAGACAC	0.698	0.1
Cluster_754	24	1:5808904-5810335	1432	CAAGGUAGUUGGCCGAAGCCGAGC	0.742	0
Cluster_755	24	1:5815935-5816247	313	AUCUCCUCCGUUAUUUGGACUUCC	0.411	0.1
Cluster_760	24	1:5902504-5902820	317	CCUGAAGACAAGAGCACAGAACA	0.655	0.1
Cluster_761	24	1:5907503-5908012	510	AAUACCAGUCAUGUAGGUACCACU	0.493	0.2
Cluster_762	24	1:5910126-5910509	384	AACGGCCGCAGCCGCCGCACGACC	0.691	0.1
Cluster_763	24	1:5938735-5939189	455	ACAACGUACGGACAUACACCUAGU	0.242	0.3
Cluster_765	24	1:5940173-5940422	250	UCGGUAACGGUAUCGAAAACGAGC	0.649	0.1
Cluster_766	24	1:5940651-5941144	494	AUUAAAUCCCCUCCAAUCCUC	0.472	0.5
Cluster_767	24	1:5941458-5941760	303	GAAGGGCUUCGACAGUUUGGAGAC	0.514	0.1
Cluster_768	24	1:5942552-5943653	1102	CUAUUUCGUCGAAACCGCACCCGU	0.372	1.3
Cluster_769	24	1:5947656-5948606	951	UGUUGAUGUAACGGUUGGCCCCGA	0.652	0.1
Cluster_770	24	1:5949669-5950124	456	CCGCACCCGGCGGUUUCGGUAAAC	0.638	0.1
Cluster_771	24	1:5950456-5951286	831	AGCGGCUCUGCUCUAAUACGCUCU	0.502	0.4
Cluster_772	24	1:5951390-5951968	579	UUAGUGAGAACCACUGUGGGAGAU	0.521	0.1
Cluster_773	24	1:5996395-5996953	559	AGAAAGACGAUUGGAGUCUCCGCC	0.441	0.2
Cluster_774	24	1:6019977-6020791	815	GCGAGAUAGAUAACAGGACAACCC	0.225	3.6
Cluster_776	24	1:6023583-6023996	414	AUAGGACACUCUCUCAAGUGACUC	0.649	0.1
Cluster_777	24	1:6024276-6024982	707	AUAGGCACGAGACGCAGCCCGAGU	0.42	0.4
Cluster_778	24	1:6025441-6025977	537	GAGGACAGUGGCACAACAAGCACC	0.554	0.1
Cluster_779	24	1:6026757-6028061	1305	AUCACCCUAGGUGCUGAAUAACCC	0.658	0.1
Cluster_781	24	1:6032719-6033803	1085	AGACGACACAUGACGCAUGAAACU	0.322	4.8
Cluster_785	24	1:6067270-6068303	1034	GCGCCUACGCCGGUGUAGAUGGGC	0.702	0
Cluster_786	24	1:6072885-6075145	2261	ACGUCCUGUAUAGGUUUUGGGCCC	0.638	0.4
Cluster_787	24	1:6075482-6076714	1233	UUCAUUAAAAUAAGAAGGUGAGCC	0.762	0.1
Cluster_789	24	1:6077757-6078834	1078	AGAGAACUGAGGAGGAAAGGGACC	0.66	0.3
Cluster_790	24	1:6078916-6082421	3506	AAGGCACGCCUGUAAGGAACACCA	0.726	0.3
Cluster_791	24	1:6083077-6086215	3139	ACCCAGGCCUGACCCUGAACAGGA	0.738	0.1
Cluster_793	24	1:6087637-6088746	1110	UGUGUGCACACGAGAUGGACUGAC	0.564	0.2
Cluster_794	24	1:6088830-6089583	754	ACGACGUGGAGAACAGUGGCGGCU	0.703	0.1
Cluster_796	24	1:6105907-6107070	1164	AUCUAGAGGACAACAAGACAGACU	0.582	0.3
Cluster_797	24	1:6107149-6108692	1544	AUGGGCACACACGUAGACUGCACG	0.647	0.2
Cluster_798	24	1:6109049-6109698	650	AUUGUGUAAGUAAGACCUCAGACC	0.822	0
Cluster_799	24	1:6110320-6111019	700	GGAUGCGCACCGCAUGACUGAGA	0.743	0.1
Cluster_800	24	1:6111200-6111620	421	AGUCCCGUUGGAGUGGCGAAGACC	0.84	0
Cluster_801	24	1:6112455-6112707	253	AUACUUCAGCCGGCCAGUAGCGCC	0.724	0
Cluster_802	24	1:6113551-6113801	251	GGACCGCACGGCUUUUCUCGCC	0.732	0.1
Cluster_803	24	1:6114157-6115159	1003	UGCGGUAGCAACAGCCAUGGGCCC	0.707	0.2
Cluster_806	24	1:6116863-6118322	1460	AAUGUAGUUGGUAACCGAGGGUAC	0.709	0.1
Cluster_808	24	1:6119477-6122272	2796	GACGACUUGGUGAUCACUGGCGCC	0.753	0.3
Cluster_809	24	1:6122632-6124870	2239	UGACACGAGCGCUUCGGGCACC	0.662	0.3
Cluster_811	24	1:6126033-6126462	430	AAAGCCACCUGGCACGUAGGGCCC	0.56	0.2
Cluster_812	24	1:6127304-6127921	618	AAAGGCCCCUAGGCCGAGACCCCU	0.736	0.1
Cluster_813	24	1:6128446-6130443	1998	CCAGCGGGUAUCUAGGCACUCAGC	0.702	0.1
Cluster_817	24	1:6132539-6133615	1077	CCUUAACGCCUUAAUAACCUUGGA	0.663	0.1
Cluster_818	24	1:6133853-6135704	1852	GGAGUCAAGGCUCUGGUACCAUGC	0.71	0.1
Cluster_819	24	1:6135779-6139206	3428	AGGCUGAGGCUCGAACCCGGGACC	0.735	0.2
Cluster_820	24	1:6139359-6139808	450	AACACCGAGCCAUGGAACAUAGCA	0.895	0
Cluster_821	24	1:6139915-6140753	839	AGUGUUCGGAUAGCAGGCACAGCC	0.706	0.1
Cluster_823	24	1:6141522-6142939	1418	AAGGGACCGGAUGUUGUGGAGUCC	0.794	0.1
Cluster_824	24	1:6143015-6143642	628	UUGCACUGGUAGCCCUGUGGCGGC	0.694	0.1
Cluster_828	24	1:6152603-6153702	1100	AAAGGAACGAGAAGAUGGAGAGGA	0.689	0.1
Cluster_829	24	1:6155111-6155933	823	AUAGUCAUCUGUGUAACAACCCCU	0.768	0.1
Cluster_835	24	1:6253276-6253371	96	AAAGUCGAGGCAGACUAGGCACCA	0.153	-1
Cluster_836	24	1:6254778-6255218	441	GUCACAUCGACACGACGAACGAGA	0.398	0.3
Cluster_837	24	1:6261546-6261910	365	AUUUCUUGAUCAGCGAACGGAAGC	0.468	0.1
Cluster_838	24	1:6262910-6263398	489	AAAUGUAUCUGUCACUUAUCUGCC	0.491	0.2
Cluster_840	24	1:6268099-6268349	251	AAGCUGUUGUGGACUGCCAAACGC	0.493	0
Cluster_843	24	1:6301923-6302292	370	AUCGAGCUGGCUCGUUAACAAACC	0.455	0
Cluster_844	24	1:6306306-6306729	424	AAAGUUUAUAUAGAUUAGAGAAGC	0.449	0.3
Cluster_845	24	1:6307369-6307550	182	ACUAAACAAGUAGGGACUAAAGUU	0.356	0.2
Cluster_847	24	1:6314491-6314731	241	AGUUUAUAGCCCAUUACCACCUCU	0.624	0.1
Cluster_848	24	1:6315825-6316043	219	AAACUGAACCGAGAAGAGAGACUU	0.545	0.1
Cluster_851	24	1:6328663-6329593	931	CCGCUUAUUCGUGUCGGGCUGGCC	0.398	0.5
Cluster_853	24	1:6381528-6381774	247	AGGCGUGGCGACCGCUUUGAGGGC	0.482	0.1
Cluster_855	24	1:6382148-6383059	912	AAGGGCUUUGUUGGUUUGUGAAGC	0.503	0.3
Cluster_856	24	1:6383566-6384754	1189	AUCAACCGAGUCUGUGGUGUGACC	0.425	0.6
Cluster_857	24	1:6410990-6411516	527	UAAGACAUUAACCAGUGGGUACU	0.596	0.2
Cluster_861	24	1:6417300-6417622	323	AGCUAGAUUUACUCUCAUGUAACC	0.407	0.6
Cluster_862	24	1:6418663-6418957	295	CUUAUUUGAAGAGGUUGAGCCGUU	0.847	0.1
Cluster_863	24	1:6419054-6419461	408	AACAAACAGAGCUAAGAUGUCAGC	0.467	0.3
Cluster_864	24	1:6420905-6421028	124	ACUCUUUAUCCCAAACAAGCCCUU	0.423	0
Cluster_866	24	1:6425433-6425508	76	AGUCUCGAACUAGACAAUAAGCAC	0.338	0.1
Cluster_867	24	1:6431658-6432416	759	AAAUUUAUUGUUGCGUGUCCCUGC	0.699	0
Cluster_868	24	1:6475653-6475708	56	CUUAAGACUCCUAAUUCUCAACU	0.222	-1
Cluster_871	24	1:6502236-6502316	81	AAGGUCGCGGCCAGGGACGAUACU	0.513	0
Cluster_872	24	1:6504932-6506354	1423	AGUGUACCUGCAGAAGAUUCUAGC	0.772	0.2
Cluster_877	24	1:6512501-6512771	271	GAGAGGGCACCGGAGUUAACGGCU	0.612	0.1
Cluster_879	24	1:6523883-6524378	496	AUCAUCAAGCUUAAGCACUCGAUA	0.707	0.1
Cluster_880	24	1:6533550-6533983	434	GAAUUGCCACGUCGGCAUCCGAUU	0.625	0.1
Cluster_881	24	1:6534299-6534759	461	CACGUCGGAGCCACUUGAGGUCCC	0.389	0.4
Cluster_882	24	1:6535528-6535781	254	AAACAGACCGUGCCGGGCUAGCCC	0.476	0.8
Cluster_883	24	1:6536471-6536864	394	AGGAACGGCCCUGGACGCUACAAU	0.417	0.1
Cluster_884	24	1:6537018-6537271	254	UCCAGCUGUUCGGACUGCUGCAGC	0.304	0.1
Cluster_885	24	1:6537502-6538109	608	AAUAGACUAUGUAAAUGACUCUUU	0.53	0.1
Cluster_888	24	1:6548994-6549778	785	CUGCCUUCGGUGAAUCUGCAUCGU	0.352	0.4
Cluster_891	24	1:6563506-6564066	561	GAGAACAACGAGAACGAAGCCCCU	0.45	0.1
Cluster_892	24	1:6606606-6606926	321	CGCCCGUGACGUCAGCAGCCGCGC	0.783	0
Cluster_894	24	1:6632428-6632790	363	AUACCUGCUUUGCCCCUGAGGA	0.707	0.1
Cluster_896	24	1:6635152-6635651	500	AUUUGAGUAUGCACAGUAUAGCCU	0.661	0.1
Cluster_897	24	1:6636512-6636704	193	AUUUCACGAGCUGGCGAAAGAGGC	0.562	0.1
Cluster_899	24	1:6649205-6649343	139	AGGCGCGAGAAGUCAUGGAAGACC	0.316	-1
Cluster_901	24	1:6652952-6653272	321	ACCUCACGGCACAGUAAAUAGAGU	0.465	0.4
Cluster_902	24	1:6765096-6765264	169	AAUUCAAACUCAUCCAAUCUCACU	0.362	-1
Cluster_903	24	1:6765361-6765766	406	AAGAGAUGAGGAUAAAAAAGUUAU	0.478	0.1
Cluster_904	24	1:6766707-6766931	225	AAUCCCAGACCCAUGCGCACUAUG	0.534	0.1
Cluster_906	24	1:6769249-6769550	302	AGUCUUUAGUUUGGCUUUUAGCUU	0.592	0.2
Cluster_907	24	1:6773955-6774692	738	AUGGAAGUACACUAAGAGAUCA	0.748	0.1
Cluster_908	24	1:6774784-6775176	393	AUAACAUAUAUAUUAUCGUGGACC	0.405	0.1
Cluster_909	24	1:6784750-6785143	394	CGGGGACCCGUUAAACUUGCACGU	0.543	0.1
Cluster_910	24	1:6785232-6785649	418	ACUGGUACCUAGAUGAACCUUACU	0.291	1.2
Cluster_911	24	1:6786346-6786599	254	ACACCCGAUUGGACUAGAAAAGCC	0.342	0.5
Cluster_913	24	1:6789006-6789449	444	UGUUGGACAGAGUGGCUCUAAGAA	0.438	0.1
Cluster_914	24	1:6798903-6799284	382	AGGAAACCCUGACGGCCAGAAACC	0.328	1
Cluster_915	24	1:6799390-6799577	188	AUCUAGUCAACAACUGUAGCAAGA	0.237	-1
Cluster_916	24	1:6819408-6820281	874	AAGCAUACGGUACUGACUUCAUCU	0.694	0
Cluster_917	24	1:6822529-6822601	73	ACACCGAGUGCUGCGUUCGGCGCC	0.282	0.1
Cluster_921	24	1:6841117-6841176	60	AUCUGCUCUGCGCAUGCGCGGACC	0.433	-1
Cluster_922	24	1:6872253-6872601	349	AGUUCUUGUUGAGUGUUUGGCGCC	0.359	0.4
Cluster_925	24	1:6902735-6903469	735	AGAGCACGAGGGAAAUUUGACACC	0.365	0.4
Cluster_928	24	1:6918498-6919248	751	UCAAACUUUUGGCACCGCCGUCGU	0.289	2.1
Cluster_930	24	1:6934419-6934611	193	UCAAACUUUUGGCACCGCCGUCGU	0.562	0.1
Cluster_934	24	1:7041414-7042646	1233	CUAUAGAGACUCUGAUGUCGAGGU	0.435	0.9
Cluster_936	24	1:7045710-7046356	647	AUGGCACACGAGCAGCUAGAUCCC	0.386	1.2
Cluster_937	24	1:7050742-7051401	660	GAUUUGUGGGCUCGAUCUCGUAGA	0.708	0.1
Cluster_938	24	1:7056334-7057651	1318	AAUCCUGGACAAACGAACGGGCCC	0.351	4.3
Cluster_939	24	1:7057789-7058174	386	AUGCAAGACACUCGGCAAAAGACC	0.204	0.9
Cluster_940	24	1:7059002-7059252	251	AUCUGGUUUGCAGACAUGAUGAGC	0.407	0
Cluster_941	24	1:7062110-7062724	615	AUAGCUACAGAAUAUAUGUCACCC	0.552	0.1
Cluster_943	24	1:7068707-7069409	703	GAAACCCAACUGAAGGAACACAGC	0.473	0.4
Cluster_945	24	1:7080446-7080671	226	AGGCGCGAGAACCAACUGGAUGUU	0.545	0.1
Cluster_947	24	1:7097475-7098269	795	AAGGGCAACCUGAAGAAGAUGACC	0.357	-1
Cluster_948	24	1:7099452-7099829	378	AGCGGAGCACCAUGAAUGUGACCA	0.624	0.1
Cluster_949	24	1:7103866-7104551	686	GAACUGCAUCUGGCAAAAGGAGGA	0.651	0.1
Cluster_951	24	1:7106004-7106441	438	AAAAGACGAAGGGUUCCGGAGACC	0.43	0.2
Cluster_952	24	1:7108038-7108540	503	AACCAGGAGGAUGAUGAACCUGCC	0.825	0.1
Cluster_956	24	1:7147386-7147848	463	AUUCGGGUUUUAAAGGUAGCAACC	0.6	0.1
Cluster_958	24	1:7183460-7183900	441	AGCUGCCUGUAAGGAUCAUGACCU	0.357	0.1
Cluster_959	24	1:7183994-7184394	401	AAGUCGUGGUAACACCAGGUGCCC	0.543	0.1
Cluster_961	24	1:7240414-7241254	841	GACCAGAGGUGGCGCCAGCGGC	0.9	0.1
Cluster_962	24	1:7241676-7242204	529	AAGGACGACUGAUCCGCUUGACA	0.84	0
Cluster_965	24	1:7244111-7244533	423	AGUGACUUGAGCUUGCACUAGACG	0.691	0
Cluster_968	24	1:7250800-7251069	270	AUGACGUAUCUGCUUCUGAGCGCC	0.703	0
Cluster_971	24	1:7252861-7254752	1892	AUCCCUGAUUCUAUGAACGGAGCC	0.637	0.6
Cluster_974	24	1:7285004-7285841	838	GAUGCUGGACCGCGAGAGACCUCC	0.204	4.7
Cluster_976	24	1:7297369-7297736	368	AUCAGAUACGAAUAUAGGAUGACU	0.349	0.3
Cluster_978	24	1:7303612-7303843	232	AUCCGACUCGGAAUCGUUCCGACC	0.462	0.1
Cluster_982	24	1:7314405-7315723	1319	AGAUAGAUCGAGCAACCCUCUACC	0.4	0.4
Cluster_983	24	1:7316137-7316903	767	AACUGGGCCACGGUCGUGCACCUU	0.728	0
Cluster_984	24	1:7321141-7321285	145	AGACUGAUUAGUGCAAACCCAGG	0.379	0.1
Cluster_985	24	1:7338942-7339652	711	AAGGAAUAACUCGGCUCAGCUCGU	0.462	0.1
Cluster_986	24	1:7342272-7342427	156	ACAUUUCAUAGAUCCAGCUGGACC	0.242	0.4
Cluster_990	24	1:7353250-7353522	273	GACCAACCGAGACAGGAUCAAGCC	0.681	0.1
Cluster_991	24	1:7362401-7362588	188	AUGACGUGGCAGCCCGCGUGGCAC	0.257	1.1
Cluster_992	24	1:7374500-7374670	171	GCGGGAGGCACCCAACCAAUCAGC	0.508	0.1
Cluster_994	24	1:7390124-7390440	317	AAAAGAAAUCAGUACUUUGGGACC	0.639	0
Cluster_995	24	1:7391766-7392106	341	GAGAGAGAGGGCGACGGCACUCAC	0.538	0.4
Cluster_998	24	1:7402774-7403555	782	ACACCCGACAAAGAACUUAUUUGC	0.525	0.6
Cluster_999	24	1:7403691-7404210	520	AAAACGCGGGCAUAUGUUAAAACC	0.392	0.4
Cluster_1000	24	1:7412735-7412922	188	ACAGUUCGCUGAACUCUCUUUGCC	0.163	1
Cluster_1001	24	1:7415546-7415844	299	AAGCUAACUUGCAUGUUGGAGAGU	0.679	0
Cluster_1002	24	1:7420410-7420912	503	AUUCUACCGUGCCGGGCUCGAACC	0.11	7.9
Cluster_1003	24	1:7455911-7456743	833	AUCAGUUAGUAGUCUGUUGAGAGU	0.508	0.3
Cluster_1005	24	1:7483112-7483261	150	UGAGAUGGGCGAGCCGAGCCGAGC	0.706	0.1
Cluster_1006	24	1:7483400-7483638	239	GCUCGGCUCGGGCUCGUUCGGAGC	0.279	0.8
Cluster_1007	24	1:7489422-7490277	856	ACUGCCCCCGCCGCAUCCCCACCC	0.516	0.3
Cluster_1010	24	1:7545952-7546282	331	ACCUGCUUUGUCCCUGAGGGGUCU	0.362	0.2
Cluster_1013	24	1:7569275-7569988	714	AUCGUCCACGCCUCCGUAGAGAGC	0.578	0.1
Cluster_1016	24	1:7599629-7600178	550	AUCGGAGUUAUAGCCUUCAGAGCC	0.282	1.1
Cluster_1017	24	1:7600375-7600681	307	AUAUAUGUUGUAUGGCUUGAACC	0.578	0.1
Cluster_1019	24	1:7657809-7658095	287	CAUUAUGGUACAGAAUUUGAUCGC	0.717	0
Cluster_1021	24	1:7660392-7660804	413	AGCCUUUGCGUCAGGUCGCAGACC	0.295	1.1
Cluster_1023	24	1:7685576-7686290	715	GAACAUUUGGCACUACGAACACGC	0.667	0.1
Cluster_1024	24	1:7687726-7688172	447	UCUCGCUGUGUAGAGAAUCUGAGU	0.702	0.1
Cluster_1025	24	1:7689834-7692720	2887	CAACGUCUUGGACAUCCCGGUCAC	0.697	0.1
Cluster_1026	24	1:7692796-7694361	1566	AUCCGGACAGGAGACUGGAGCACC	0.796	0
Cluster_1027	24	1:7694466-7695503	1038	AUUGGCAACGACGCGGUACUCAGC	0.65	0.2
Cluster_1028	24	1:7695638-7696697	1060	CAAGGAAUAUUCAGCAAGGUCAGC	0.86	0
Cluster_1029	24	1:7701635-7701917	283	AUAUCGUCCCAACACACAGUAUGU	0.672	0.1
Cluster_1030	24	1:7702249-7702494	246	CCCUUAGCCACUGGACGCUAGCAU	0.431	0.1
Cluster_1033	24	1:7715134-7715242	109	AAACGGAUGGCUAGCUGCACCAGA	0.224	-1
Cluster_1034	24	1:7716658-7717036	379	AACUAAAACGAAACGGAAGGAGUA	0.38	0.1
Cluster_1035	24	1:7717253-7718292	1040	ACGCGUGAGUGAGCAGCUGAAAGC	0.543	0.3
Cluster_1036	24	1:7719067-7719383	317	AUCACAUGGGACGACUUUAUAAGU	0.611	0.2
Cluster_1037	24	1:7758717-7759181	465	AACUACAGGAAGCCCCGACCACCC	0.547	0.1
Cluster_1038	24	1:7759488-7759809	322	AAUCUAAUGGACUAGAUGAUUUGU	0.452	0
Cluster_1039	24	1:7760933-7761542	610	AAUGAACGGGACAGUACGCCAUGC	0.652	0
Cluster_1043	24	1:7770200-7770889	690	ACAUUUAGGGUCUCUGGCACAUCC	0.193	-1
Cluster_1049	24	1:7781272-7781794	523	GGUUUCAGAUUUGCACUACGAGAA	0.568	0.2
Cluster_1052	24	1:7843746-7844355	610	UUUUCUAUUAGUGAAAAAAGUGAC	0.69	0.1
Cluster_1054	24	1:7875049-7875355	307	AUCUCUUGUGCUUGGAGAACCGUU	0.479	0.1
Cluster_1056	24	1:7880616-7880894	279	AUAGCUUCUUCGCCGAGUGUGAGU	0.319	0.4
Cluster_1057	24	1:7883359-7883746	388	AUGAUAGAGUCAUGAUACGCCACC	0.452	0.3
Cluster_1059	24	1:7886969-7887651	683	AGCAAGGUGGCACUCUUGAGCUCC	0.618	0
Cluster_1068	24	1:7970367-7970907	541	UUGUACUGUUUGUACACUGUUCGC	0.445	0.1
Cluster_1069	24	1:7972001-7972195	195	AUUUGGCACCUAGACGGUCGGUUC	0.183	0.3
Cluster_1072	24	1:7977539-7977611	73	AAAGCCAGAGCCAAAAGCCAAACC	0.491	0.1
Cluster_1073	24	1:7978234-7978582	349	AUCCAUCAUAUCUCUCAUCUCAUC	0.571	0.1
Cluster_1074	24	1:7979971-7980509	539	AAAGUCUGUACCGAGUGCUCGAGA	0.364	0.2
Cluster_1076	24	1:7983755-7984129	375	UUUUCUACUAGUAUAACUUGGCUC	0.617	0.1
Cluster_1077	24	1:7984452-7985028	577	AUUGGAUGAUACUAUGGUAUAUGA	0.39	0.5
Cluster_1078	24	1:7991606-7992188	583	GAUGUAGCAAGUUUGAAUAUAACG	0.623	0
Cluster_1082	24	1:8016121-8016621	501	ACAGUACCAUGGUCUGGCCCUACC	0.273	0.7
Cluster_1083	24	1:8032641-8032853	213	GCAGCGAGGUCGCGGAACAUUCGC	0.435	0.1
Cluster_1084	24	1:8034429-8035010	582	AGCAAAAUAACUGUAGCACAGACU	0.634	0.1
Cluster_1085	24	1:8037499-8037831	333	AAUUUAGACGCAACCGAACAAGCC	0.276	0.7
Cluster_1087	24	1:8039668-8040032	365	UGGUCCGAGUAGCACUUUUUAGGU	0.492	0.1
Cluster_1089	24	1:8041641-8041871	231	GAAGCUAUGGGCCCAGAUGACACC	0.633	0
Cluster_1092	24	1:8052306-8053024	719	GAAUUGCUGGGACGAGAACGGGGU	0.641	0.1
Cluster_1094	24	1:8057775-8058377	603	AUGGCACACGCGAGAACACGGGAU	0.474	0.2
Cluster_1095	24	1:8058492-8058859	368	ACAGACCUUCAGAAUGAUGAUACC	0.353	0.6
Cluster_1097	24	1:8065114-8065330	217	ACCGAAGGCAGAACCAGGAGAGGC	0.323	0.4
Cluster_1100	24	1:8107643-8107818	176	UUCGGAGGGAUAAUGUAAAAACGU	0.391	0.1
Cluster_1101	24	1:8108067-8108411	345	GUUUCGUGGCUCCCAAACUAGCAC	0.714	0
Cluster_1105	24	1:8113465-8114668	1204	AGAUUACCCGGAGGCAGAACCAGG	0.326	0.3
Cluster_1106	24	1:8118519-8119236	718	AAUAAACCGAGCUAGUUCUUUAAC	0.375	1
Cluster_1107	24	1:8122857-8123152	296	AUGGAACGAGAGAUAAAACUGAUU	0.369	0.2
Cluster_1108	24	1:8123464-8124209	746	GAACGCAGUUGGAUAAGGUAGAUG	0.296	2.3
Cluster_1109	24	1:8124339-8125292	954	AAUGUCAAGAUCAGUCGAAGGUCU	0.503	0.7
Cluster_1110	24	1:8126092-8127172	1081	AUACCCACAACUGUCGGAUCAAGU	0.39	0.6
Cluster_1111	24	1:8127252-8128424	1173	AUAGAACUCUUGUUAUUAACACCG	0.493	0.4
Cluster_1112	24	1:8128542-8128753	212	GUAGUCUGUAGCACUCCAAACAGC	0.362	0.3
Cluster_1113	24	1:8130200-8130701	502	GAUAUCGGAUUUCGCACUGGGCCC	0.245	0.7
Cluster_1114	24	1:8130842-8131044	203	AGAGGGCCCCGUAGCCACUGUACG	0.518	0.1
Cluster_1115	24	1:8131210-8131764	555	AUCUUUCUCUUUUUUCUAUGUACU	0.519	0.2
Cluster_1117	24	1:8151765-8151990	226	ACCUAAUGGAUUAUUUGCGCUAGA	0.784	0
Cluster_1121	24	1:8164263-8165047	785	AGUAAACUGUUGGACAUGAGAACC	0.222	3.5
Cluster_1122	24	1:8166240-8166601	362	GAUUUAGACUCUAUUCAACAACGU	0.66	0.1
Cluster_1123	24	1:8166698-8167666	969	GAGCUUGGCCCAUCGGAUACUGUC	0.612	0.4
Cluster_1126	24	1:8222832-8224307	1476	AUUAAGACGUUAGUGUAGACUGCC	0.59	0.3
Cluster_1127	24	1:8224504-8225211	708	AGAGAGCUCGUGGCAAUGGCAGCC	0.419	0.3
Cluster_1128	24	1:8227526-8228933	1408	ACUCUCAAUAGCCGGUGUGGCACU	0.448	1.1
Cluster_1132	24	1:8234819-8236157	1339	CAUGAACGAGAACAAGAUCGAGCU	0.803	0.1
Cluster_1135	24	1:8237701-8238410	710	CUCCGGCCUCCGGUGGUCUGGCAC	0.661	0.1
Cluster_1137	24	1:8239005-8239917	913	AUCUGACCGUGGUGAGAAUUUACU	0.355	1
Cluster_1138	24	1:8241286-8241641	356	AACCCGGAAUACCCGAACCCGAAA	0.416	0.1
Cluster_1140	24	1:8243656-8243939	284	AGAAGAAUCAAGAGGAUCAGCUCC	0.46	0.2
Cluster_1141	24	1:8244303-8245007	705	AAACGGAGAUGAGAAGCUAAAACC	0.63	0.1
Cluster_1142	24	1:8245090-8246475	1386	GCAGAACCGGUUGGUGUGGACGCC	0.377	0.7
Cluster_1144	24	1:8247445-8248144	700	AGGAUUUCUCUAAGUGUAGGGCCC	0.49	0.2
Cluster_1145	24	1:8248275-8249504	1230	AUCUGAAUAUAAACAGGACAUCCC	0.323	0.9
Cluster_1146	24	1:8249651-8250297	647	AUUCCCGACUAUUCCGGAUCUGAU	0.313	1.2
Cluster_1147	24	1:8250662-8251166	505	GUAGGUCCGGAUGACUCCAGAAGC	0.362	1.1
Cluster_1148	24	1:8274567-8275204	638	GAACCCAAGGUGCCAAGUACCGCC	0.505	0.1
Cluster_1149	24	1:8275693-8276165	473	GAAGAACGUAGGAGGAGUACGCCU	0.57	0.2
Cluster_1150	24	1:8279567-8280330	764	ACACUGUUUUGCACUUUAGGAUGU	0.467	0.1
Cluster_1151	24	1:8286067-8286605	539	AGCAAACCCACUGUGGGCCUCACC	0.278	2.4
Cluster_1152	24	1:8292026-8292657	632	AAACGAUAGCGGAGUAACCGGAGC	0.523	0.4
Cluster_1153	24	1:8294577-8294807	231	ACUGACUCUUGAUAUAUCGAAACC	0.56	0.1
Cluster_1154	24	1:8295130-8296187	1058	AAAUGUCGUGACUUGCGACUUCGA	0.626	0.1
Cluster_1155	24	1:8296724-8298172	1449	UUCGAUGAAAAAUCGGAUUGGCAC	0.511	0.3
Cluster_1156	24	1:8299156-8299593	438	AAUUACAUCAUAGGAAGACAAUGA	0.654	0.1
Cluster_1157	24	1:8299804-8300917	1114	AUCUAAACUUAGAGAACCGUGUUA	0.49	0.1
Cluster_1160	24	1:8303897-8305389	1493	UGGCACCUCUACUCUGGCCACACG	0.758	0.1
Cluster_1161	24	1:8309885-8310180	296	CUCAGACCACCUAACCAACUCAGU	0.757	-1
Cluster_1162	24	1:8312836-8313255	420	GAUCACCAGUAGCCAGCUCAGAGU	0.454	0.4
Cluster_1164	24	1:8332183-8332740	558	AUUAACAACGUAAGGGGUACUGCC	0.369	0.8
Cluster_1166	24	1:8336796-8337162	367	ACCUUGAUCAUUGGUUUCCGAGAA	0.825	0
Cluster_1167	24	1:8337393-8337618	226	UUCGGAGGGAUAAUGUAAAAACGU	0.342	0.1
Cluster_1169	24	1:8340915-8341116	202	GGAUGACCAGGACACAUAACUCGG	0.681	0.1
Cluster_1170	22	1:8352459-8352576	118	CCUGCUUCCUGACUUGGUCAUC	0.137	-1
Cluster_1176	24	1:8367519-8368097	579	AUUAACAACGUAAUGGGUACUGCC	0.496	0.2
Cluster_1179	24	1:8388661-8389233	573	AAGAAAAGCGUGGUACGACUCACC	0.296	1.9
Cluster_1180	24	1:8390319-8391977	1659	ACAUAAUCGUCAGCUUACAACAGC	0.521	0.8
Cluster_1181	24	1:8392071-8392517	447	AAAAUCUCACCCGUGAACGUUCGC	0.419	0.1
Cluster_1182	24	1:8393355-8394087	733	AGGAUAUGGAUACAAUUUGCUACC	0.474	0.6
Cluster_1183	24	1:8394225-8394906	682	AUAAAGCAAACCGUCAGUGGAAAU	0.672	0
Cluster_1184	24	1:8413675-8413818	144	AUCGCACGGGCACCUACCUAGUAC	0.459	0.1
Cluster_1185	24	1:8413950-8414136	187	GACAAAUAACGGUUUAGUAGCACC	0.659	0.1
Cluster_1187	24	1:8418814-8419905	1092	GAUGGCGGCUACGCCCUGACACGG	0.676	0.3
Cluster_1188	24	1:8421333-8421532	200	AUUAUAUCACAGGCGUACUGAACC	0.291	0.4
Cluster_1189	24	1:8461906-8462692	787	GCCAUGGACCUGGAAGUUUGUCCC	0.772	0
Cluster_1190	24	1:8463014-8463572	559	AAAGGGCUAGAUCCAGAAAGCAGC	0.395	0.2
Cluster_1192	24	1:8466756-8467496	741	UAAGAACGUAAGGAGGGCGUCCAC	0.558	0.1
Cluster_1193	24	1:8467573-8467863	291	AAUUUAAUGUCUGAUAUGUGGACC	0.332	1.1
Cluster_1196	24	1:8493649-8494638	990	CAGUCAUCGGAGACUUGCAAUACC	0.444	0.6
Cluster_1197	24	1:8495112-8495471	360	CACUUCAAUUUGGAUGGUUUGAUU	0.645	0.1
Cluster_1198	24	1:8496024-8496268	245	AACGGGAUGUGGCAGGAUGGCUCC	0.653	0.1
Cluster_1199	24	1:8498865-8499356	492	GUCUAAAUCAUCGGACAUAAGCCU	0.509	0.1
Cluster_1200	24	1:8551244-8551662	419	ACAUAACAAAACGCUACAGUUCCC	0.571	0.2
Cluster_1201	24	1:8551752-8552303	552	AUACAACACUCUCACGUAGUACC	0.432	0.3
Cluster_1203	24	1:8557652-8557833	182	ACGUAAUUCUAAUGAUACUCAGAU	0.355	0.7
Cluster_1204	24	1:8571945-8572122	178	CUGCUGUGUCAAACACUUAGGCCC	0.146	1.6
Cluster_1208	24	1:8611206-8611380	175	AAACUGGCAGCAAGAUAAUAGGCU	0.348	0.4
Cluster_1209	24	1:8611695-8611993	299	AAAAAUGGCAAGAGAACCAACCAC	0.505	0.1
Cluster_1210	24	1:8612376-8613003	628	CAACUUCUCAACCGGGCAGGACGU	0.635	0.1
Cluster_1211	24	1:8662652-8663170	519	CCAUGAGGCUCAUAUUAC	0.495	-1
Cluster_1214	24	1:8683259-8683483	225	AUCUGCGCGUACAAGCUAUCCUCC	0.5	0.1
Cluster_1215	24	1:8683562-8683660	99	GAUUAGACUACGAGUUGAGCGAGC	0.141	-1
Cluster_1216	24	1:8684855-8685011	157	AAAAAGUACGGCACUCGGCAAAGU	0.357	0.1
Cluster_1217	24	1:8685597-8685922	326	GUAUGAGUCACCAAUCGGAUCACC	0.698	0
Cluster_1218	24	1:8687822-8688327	506	ACCCACAGGUAGAAUAUUUAGCCC	0.405	0.5
Cluster_1219	24	1:8772892-8773602	711	AUCUGACAAUUUUGGCGUUUAACC	0.641	0.1
Cluster_1222	24	1:8815112-8815226	115	AUUCGGCAUACACUGACGCUCGGU	0.182	-1
Cluster_1224	24	1:8826222-8826383	162	AGCGAAAUGAGGCCGGAUUGGUGC	0.53	0.1
Cluster_1226	24	1:8852474-8852716	243	CUGACCAGAGAGCACCACCGCCUA	0.931	0
Cluster_1227	24	1:8908640-8908761	122	AAAUAGCACAGUCGAUGGAUAACC	0.294	0.2
Cluster_1228	24	1:8922501-8922861	361	AUCCGACACAACUCGAUAAUACGU	0.521	0.1
Cluster_1229	24	1:8923289-8924001	713	ACAUGUUGCGUGCUCUUGGUCAUC	0.736	0
Cluster_1232	24	1:8967528-8968258	731	CAUCUUAUGAACCAUAGAGUGACU	0.355	0.9
Cluster_1233	24	1:8968375-8969380	1006	AUAGGCCCUGUUUGGCACAGCUGC	0.458	0.3
Cluster_1234	24	1:8973952-8974148	197	AAGAUGUCGUAGAUAUUUAUGUGC	0.333	-1
Cluster_1235	24	1:8974642-8975239	598	GACGGCCUGGCUCAUGCAGCUAGC	0.358	0.8
Cluster_1237	24	1:8976065-8976562	498	CUGUACAAAACAGAGCUCGGCGCC	0.578	0
Cluster_1238	24	1:8977548-8978672	1125	GUUUAGCUCGACACGAACACAACC	0.518	0.4
Cluster_1239	24	1:8981566-8981780	215	AGUGGCACACAAGGAAUGAAUAUA	0.667	0
Cluster_1240	24	1:9006398-9006764	367	AAUAUGCCCAUGGACGAACAAAGU	0.667	0
Cluster_1241	24	1:9013832-9014326	495	AGUGUCGGAUCUACACCCCGGGCC	0.529	0.4
Cluster_1243	24	1:9017546-9018338	793	ACAGUCCGCAGUAGCUUUUGAUGG	0.568	0.1
Cluster_1248	24	1:9079450-9080760	1311	AGGAACCAGAUGAACAUAGGCAUG	0.673	0.1
Cluster_1250	24	1:9086245-9086472	228	ACCGGACCUCCACGAGGAAGCACC	0.429	0
Cluster_1253	24	1:9102861-9103220	360	AUGUAACGAUAACUGUCACUAUGA	0.708	0
Cluster_1254	24	1:9104440-9104843	404	AUACACUUCUUUCUUGAUAGAACC	0.467	0.1
Cluster_1257	24	1:9106379-9106530	152	AGACCGGGCACCAAAUUCGGAGGC	0.433	-1
Cluster_1260	24	1:9117964-9118331	368	AACAAAGAACGGAGUGGCUCCAUU	0.408	0.2
Cluster_1261	24	1:9118459-9119271	813	ACUAAACUUUAGUCACCCCAAACC	0.533	0.3
Cluster_1262	24	1:9122839-9124221	1383	ACUUGCCUAUGUAAACUCUGCAGA	0.474	0.4
Cluster_1263	24	1:9153747-9154235	489	AACUUCUAAUCUGAACCACAUGAU	0.57	0
Cluster_1264	24	1:9156962-9157560	599	AUAAGUUUGACUCGAACCUUAUCU	0.294	1.5
Cluster_1265	24	1:9157900-9159449	1550	AGCAAUAUGAAGUGAGAACUCACC	0.545	0
Cluster_1266	24	1:9159530-9159706	177	AGACUUAUGAUGCACCACCUCAUC	0.521	0
Cluster_1267	24	1:9163966-9164613	648	AGCAAGUUAAAUGGCUACUCUGUU	0.537	0.1
Cluster_1268	24	1:9164959-9165982	1024	AAUGUGGUAGCUCGUUAACAAACC	0.472	0.2
Cluster_1269	24	1:9174797-9175011	215	AUAAGACGAAGGGUUCCGGAGACC	0.355	0.1
Cluster_1271	24	1:9175881-9176212	332	CGGCGGUGCUCUCUGUUCAGGCGC	0.341	0.3
Cluster_1272	24	1:9176303-9176821	519	CUAAACUGCUCUGCGCACGCGCGC	0.452	0.1
Cluster_1275	24	1:9206912-9207281	370	ACCGUCUGCGCCUGACCAGAGAGC	0.564	0.2
Cluster_1277	24	1:9207817-9208986	1170	AUCUAUCUAAAGUGUAGCUCAAGC	0.479	0.6
Cluster_1278	24	1:9209872-9210660	789	AAUCUAGGGCACCAUAACUCCAUA	0.493	0.3
Cluster_1279	24	1:9224516-9224891	376	AUUCCGGACGCAUCACAUUUUGGA	0.645	0
Cluster_1283	24	1:9227716-9227943	228	CUAAAACUCUGGGUGGAGCAGCUU	0.433	0.4
Cluster_1284	24	1:9228108-9228328	221	AAGACGACUUACAAGACUAGAAGC	0.507	0.1
Cluster_1285	24	1:9233262-9233544	283	AUUGGACGAUAACUAGAAACUCCC	0.4	0.2
Cluster_1287	24	1:9255373-9256062	690	AAGGACACCAGCAAAACCGAGAGC	0.601	0
Cluster_1288	24	1:9258586-9258873	288	AGGUGCUACUAGGAAUUCUUAACC	0.481	0.1
Cluster_1289	24	1:9260488-9260765	278	AAUGAACCGAGCUAGAAUGUCAGC	0.274	0.2
Cluster_1292	24	1:9269004-9269241	238	ACGGGUAAUGUCUCGAGUUGAGUC	0.661	0
Cluster_1293	24	1:9271022-9271312	291	AAUUGAAGGAGCUAAAAUCACUGA	0.477	0.1
Cluster_1295	24	1:9277390-9277793	404	AGUUCGGCUAGGCCGGGGACCUGC	0.66	0.1
Cluster_1296	24	1:9278057-9278230	174	GAGAACUACGUUACCAUAGAUCAC	0.533	-1
Cluster_1298	24	1:9295585-9295853	269	UUCUCUGUCGUGCUUAUGGGAAGG	0.311	0.2
Cluster_1299	24	1:9296719-9297203	485	UUGUGUUGUUGUAGCCCUGAUGGC	0.648	0
Cluster_1301	24	1:9310170-9310463	294	GGCCUGCUGGAUCGUGUCGUGCC	0.76	0.1
Cluster_1302	24	1:9326758-9326985	228	AGGGGACCUUGUUGGAGCCAGUCU	0.49	0.1
Cluster_1303	24	1:9340272-9341181	910	AAAAAGUGUAGAGCGAGCACUCGA	0.514	0.1
Cluster_1304	24	1:9345150-9345593	444	AGGGACCCUCAUGGUGAAAAUCUA	0.484	0.2
Cluster_1305	24	1:9358451-9359251	801	ACACCCCUUGAGAAACACUGUAUC	0.241	1.4
Cluster_1306	24	1:9366467-9366918	452	AGAAACGACGGGAAUUAAACUGUU	0.607	0.1
Cluster_1307	24	1:9367022-9367830	809	AUUUAUAGGCACGAGUCGCAGCCC	0.465	0.2
Cluster_1309	24	1:9401996-9402281	286	AAGCUCUGCGCGGGAUCGGCUACC	0.376	0.3
Cluster_1310	24	1:9403507-9404596	1090	AUCUCGCUCCACAAGAUCUCAACC	0.62	0.5
Cluster_1311	24	1:9405955-9407615	1661	ACCCGUACUACGAGUUUUGAUCAU	0.683	0.1
Cluster_1312	24	1:9411505-9412133	629	AUUCGGUAUUUGUCCAUAUAACCC	0.541	0.2
Cluster_1315	24	1:9424191-9424515	325	GAUCCGACCAGACGGCUCCCAUGC	0.617	0.1
Cluster_1316	24	1:9449340-9450086	747	AUCAAACAUAUCUUUACUGGCUGC	0.447	0.6
Cluster_1317	24	1:9454054-9454698	645	AAGCAUAGACAUUAGACUUAAGCC	0.249	-1
Cluster_1319	24	1:9478565-9478930	366	AGGUUAAAAUAGAAACUCACACCC	0.541	0.1
Cluster_1320	24	1:9481344-9481853	510	AGGCAUCAAGCGUAUAGUGACUCC	0.532	0.3
Cluster_1323	24	1:9494047-9494257	211	AUUUCGGGGUGACACGACACGACC	0.206	0.8
Cluster_1324	24	1:9494377-9494762	386	CCAAAAUUUGAGAUUCUGCCC	0.657	0
Cluster_1325	24	1:9494928-9495517	590	UUUUGACCCUUUGCUCGGCGCC	0.642	0.2
Cluster_1326	24	1:9495862-9496131	270	ACGCCGUGGCGUUGACGUGGCACC	0.298	0.7
Cluster_1327	24	1:9496473-9496719	247	AUAGAGGAGUAGAACGAAGAGUGU	0.659	0
Cluster_1328	24	1:9505472-9505647	176	AGAAUGGCAGAACGGCAGAACGGC	0.515	-1
Cluster_1329	24	1:9506225-9506633	409	UGGUCAAAGCUUGUAGUAGGGGUU	0.633	0.1
Cluster_1330	24	1:9546498-9547120	623	AUUCUGAGUCCAUUUACCUGCAUC	0.657	0.1
Cluster_1338	24	1:9573302-9573571	270	GGUGACGAGGGACAGCGGGACGGC	0.59	0.1
Cluster_1341	24	1:9596619-9597240	622	GUGGACUGCCUUCGGGCCCCUGAG	0.682	0
Cluster_1345	24	1:9610567-9611035	469	GAGGCUUGGCAACGACGACGCACC	0.478	0.1
Cluster_1348	24	1:9619246-9619961	716	GCCUUGGCCCAGCCCAUGUAACUC	0.717	0
Cluster_1350	24	1:9621710-9622112	403	CACAUAUUUAUAGGGACUCAACC	0.793	0
Cluster_1353	24	1:9624028-9624997	970	AACGCAAUAGUGACCAGCACAGCC	0.688	0.1
Cluster_1354	24	1:9626142-9626548	407	AUGGAUCAGCACAAAACGAACAGG	0.696	0.1
Cluster_1360	24	1:9644371-9645051	681	AUGGUACCCGCGAAACAUGGCAGU	0.537	0.2
Cluster_1361	24	1:9705320-9705500	181	CGUGACCUCGGCCCAAACCCGAUC	0.286	0.3
Cluster_1363	24	1:9729316-9729876	561	AGGCACGAGGAGAUUUUAAAGACC	0.461	0.2
Cluster_1364	24	1:9732488-9732843	356	AGGGCUGAUUUAGUGAACAGAGCC	0.377	0.3
Cluster_1366	24	1:9734008-9734490	483	ACGAACACUUCCUCGAGGUCAGCC	0.416	0.1
Cluster_1368	24	1:9744409-9746260	1852	AUAGAGAUGGUCAAACGGGUCGCC	0.552	0.3
Cluster_1369	24	1:9749105-9749894	790	AGGCCUGGCCCACAUUAUAUUGAA	0.673	0.1
Cluster_1370	24	1:9750556-9750894	339	AAUAUUCUUGGCACUCGGCACAUC	0.248	1.3
Cluster_1371	24	1:9751656-9752577	922	AGAUCUGUACAUACCUAUACUCGU	0.456	0.3
Cluster_1373	24	1:9754198-9754901	704	AAAGUGAAGUAGUAUAAUGGAAGU	0.725	0.1
Cluster_1374	24	1:9768464-9768735	272	AAAGUGAAGUAGUAUAAUGGAAGU	0.458	0.1
Cluster_1375	24	1:9773666-9774781	1116	AUAUUUGGACGGCAUACCCUUACC	0.524	0.4
Cluster_1377	24	1:9777793-9778369	577	AGGUGGACUACAAUAUAUAGAGAC	0.251	0.8
Cluster_1379	24	1:9778757-9779605	849	GGCGGAUCGAGCCGAGAAGGACGC	0.798	0.1
Cluster_1380	24	1:9779712-9780174	463	AAUUGAACGCGUGCAUGUUUUACC	0.584	0.1
Cluster_1381	24	1:9780375-9780744	370	AUAGAGGAAUGAGACGAAGAGUGU	0.642	0
Cluster_1382	24	1:9880076-9880249	174	AAACAAUACGGGCCUUUUCGAGCU	0.364	-1
Cluster_1383	24	1:9885858-9886122	265	AACCAACUCAGGUAGAGACCUCUU	0.324	0.2
Cluster_1386	24	1:9985481-9985754	274	AGGAUGACUUCUUUUACUGCACCA	0.355	0.5
Cluster_1390	24	1:9992460-9993186	727	GAAGCCGAACUUCGGGCUCUUGCU	0.887	0
Cluster_1394	24	1:10027604-10027937	334	GAUUUUGGCCCCUCAAUCCCCUCC	0.57	0.1
Cluster_1395	24	1:10031401-10032312	912	AUCUGAGACCUUGGCGUAGACUGU	0.322	1.5
Cluster_1397	24	1:10058559-10059360	802	GGUAGACUACACAGUGGUACUCGA	0.376	0.7
Cluster_1398	24	1:10059435-10059807	373	ACAGUACCACAAGCGAAGGAGCCU	0.269	0.8
Cluster_1399	24	1:10059940-10060637	698	AACAAAUUAGGGUUGCCUAGAGCC	0.392	1.1
Cluster_1400	24	1:10060772-10061239	468	AACGGUUCAAAUCGCUGAAUAACC	0.4	0.5
Cluster_1401	24	1:10064879-10065378	500	GAAUCCAUCUUGGACAGGAAAUGA	0.538	0
Cluster_1403	24	1:10091631-10092636	1006	ACCAAAUAACUUAACAAGAUCUGU	0.397	0.4
Cluster_1405	24	1:10094381-10094833	453	AGACUUAAGGGAAAGCGGAGAGGC	0.419	0.6
Cluster_1406	24	1:10104160-10104794	635	AUGGUUCCCAAACUAAGGCUUAGU	0.564	0.1
Cluster_1407	24	1:10106160-10106864	705	ACGCAACAAAAGAAUGAGAAUGGA	0.484	0.1
Cluster_1408	24	1:10110951-10111100	150	CCGUUAUCCCAUCGGGAUCUGAGA	0.824	0
Cluster_1411	24	1:10145701-10146836	1136	UUUCUCUGACCCGAGAUCAAAGC	0.6	0.4
Cluster_1412	21	1:10150841-10151709	869	UGAACUGCUUGUAACCGUGAAUU	0.789	-1
Cluster_1413	24	1:10155688-10156243	556	AAAGUGGAGGGACUAAUGUUUAGU	0.376	0.5
Cluster_1415	24	1:10157648-10157857	210	AUAUCUAGGGUAGAUAUGCUUAGC	0.418	0.1
Cluster_1416	24	1:10158478-10159387	910	ACGACGGCAGGCGUAUCACUCACC	0.539	0.2
Cluster_1418	24	1:10161902-10162401	500	CUAAUACACUGAUUUAUUGUUCGC	0.645	0
Cluster_1419	24	1:10163871-10164474	604	AGAAUGAACUUAUGAUGCAUCACC	0.395	1.1
Cluster_1420	24	1:10186045-10186310	266	ACCGUCCGCACCUGUGAAGAGAGC	0.29	1.7
Cluster_1421	24	1:10187009-10187459	451	ACGGGCUUCUGCAACUUCUCACGC	0.629	0.2
Cluster_1422	24	1:10192253-10192413	161	ACCUGACCUGGGCUGACGACUGCC	0.571	-1
Cluster_1423	24	1:10193052-10193570	519	AGCCUUCGCUCCUGUUCGUCGAGA	0.236	1.4
Cluster_1424	24	1:10194100-10194664	565	UCUUUUCGGAUUCUUUUUCUCCUU	0.676	0
Cluster_1425	24	1:10215605-10215913	309	AUGUUUCUCGUCUCGAUCUGAAUC	0.528	0.1
Cluster_1426	24	1:10216956-10217543	588	AUCAGAAAUCGUAGAUGUGCUCGU	0.582	0.2
Cluster_1428	24	1:10231620-10231846	227	AUUUCAAUUUGCUCUGCGUGAUU	0.662	0
Cluster_1429	24	1:10232977-10233564	588	AAGGAAUGUUGACGAGUUGGAGGC	0.544	0.1
Cluster_1430	24	1:10257075-10257611	537	AAGGGCUGAUUUGGUGACCCGGGA	0.698	0.2
Cluster_1433	24	1:10282203-10282455	253	GUGUAUGAAAAUUGACCCAAACCC	0.319	-1
Cluster_1435	24	1:10316844-10317171	328	UAGCUGGUUGGCUCCUGCACGUAU	0.737	0.1
Cluster_1441	24	1:10332696-10332921	226	AAAGAUCCAACCUGAAGAGAAGU	0.263	0.4
Cluster_1442	24	1:10339350-10339535	186	AUUCCAGCAUUCGACGCGGACGCC	0.5	0
Cluster_1445	24	1:10358985-10360304	1320	ACUUGCAUUUCUUUGAAACCAACC	0.509	0.3
Cluster_1446	24	1:10442965-10443200	236	AUUUAAUCACCGGAGAACAAUGCC	0.597	0.1
Cluster_1447	24	1:10451898-10452112	215	AAAACCCUAGCCCUAGAGCUCUUC	0.439	0.2
Cluster_1448	22	1:10453787-10453821	35	UCUAGAGUCUGAAGACAACGCC	0.235	-1
Cluster_1453	24	1:10489208-10489696	489	CUUCUCUGUCGAAGGGCACACCGA	0.65	0
Cluster_1454	24	1:10489843-10490473	631	GAGAUUAAGAAGAAGCACUCGACC	0.479	0.5
Cluster_1457	24	1:10496732-10497915	1184	UAGAGUUCCCUUCUCAUCGUCCAC	0.767	0.1
Cluster_1458	24	1:10498767-10499531	765	AGUAAAGCUCGGACAGUAGUCAGA	0.756	0.1
Cluster_1459	24	1:10499795-10500906	1112	UUUUCUUUGUUCCUGAGCUAUC	0.675	0.2
Cluster_1460	24	1:10501004-10505236	4233	ACUUCGCACGGGACUGCCCCAAGC	0.714	0.4
Cluster_1461	24	1:10505333-10507186	1854	GCGCGUCGUGUGUGCGGGCGGCCC	0.695	0.2
Cluster_1462	24	1:10507283-10509321	2039	GGCGCCCGUCGGCAGGGAACGACC	0.63	0.3
Cluster_1463	24	1:10509631-10510565	935	CUGAGUUCGAAUCCUAGUGGGAGC	0.651	0.1
Cluster_1464	24	1:10512094-10514364	2271	AGUUGUUGCAGACUGCCAAACGCC	0.657	0.4
Cluster_1465	24	1:10514723-10516282	1560	AUCCCCCUCUGGAUUGGUGUAACC	0.605	0.3
Cluster_1466	24	1:10516370-10517818	1449	UAAGGGUGUGUGGUGUUUCUCAUC	0.814	0.2
Cluster_1467	24	1:10517905-10518672	768	CUCCUCAACUGUCUCCCUUCCACU	0.779	0.1
Cluster_1468	24	1:10518960-10522400	3441	GCGGAGUUUACAGACUGGACUCGA	0.696	0.7
Cluster_1469	24	1:10522949-10523339	391	GGGCACAGCGCCGGCACAGGGAAC	0.564	0.1
Cluster_1471	24	1:10530482-10535995	5514	CGACUCUAGUCGCCUGAGCACCGA	0.711	0.6
Cluster_1473	24	1:10540738-10544544	3807	CUGUGUGCCACUGCUGCCCUCACC	0.647	0.6
Cluster_1474	24	1:10544654-10546401	1748	GAUGAGGCUUGUAUUACUCGCACC	0.681	0.2
Cluster_1475	24	1:10546478-10549913	3436	AGUCUACGGCCGGAGAAGAGCAGC	0.678	0.6
Cluster_1477	24	1:10551829-10553272	1444	AGCGACUGUACCAGGCUCGUGGUG	0.813	0.2
Cluster_1478	24	1:10553400-10556080	2681	UGAAAGUGAGAUACUGGAGAGCC	0.739	0.2
Cluster_1479	24	1:10556377-10556994	618	UGUUCAAUGGAAUUUGACCCUCUU	0.912	0
Cluster_1483	24	1:10559647-10559870	224	AAGCCGGCACGAGACGACGACUGU	0.379	-1
Cluster_1484	24	1:10560528-10561022	495	CGGAGUAGUGACGCUGAACGCC	0.47	0.5
Cluster_1485	24	1:10561148-10561878	731	UACUCCAGCACCGAAGGUACCC	0.678	0.1
Cluster_1486	24	1:10562213-10563425	1213	AAUCUAAUAGAUCAAAUGGUUUGC	0.6	0.1
Cluster_1487	24	1:10567361-10570050	2690	AGGCUAAUCUAAGUGACAUGGACC	0.773	0.2
Cluster_1489	24	1:10573524-10575279	1756	GUGUUCGGUAGAGGAUGCUACAGU	0.412	1.2
Cluster_1490	24	1:10618751-10619006	256	AUUAACGUUGCGAAACUAAUGGCC	0.551	0
Cluster_1491	24	1:10620823-10621166	344	AUCUGAACACCAUGAUAUUUACGU	0.416	0.1
Cluster_1492	24	1:10627681-10628018	338	AUUCACUCGUCGACUUAGGGACCC	0.33	0.6
Cluster_1493	24	1:10678254-10678527	274	AGUUCUUCUUGAGUAUUUGGCGCU	0.316	0.3
Cluster_1495	24	1:10688709-10689334	626	AAAUCUGAAAGCACCCCUAAACCU	0.5	0.5
Cluster_1496	24	1:10690365-10691056	692	CAGCUGUUUGGAUGUCGUGUCACU	0.661	0.3
Cluster_1500	24	1:10749996-10750910	915	GAAGGAAUCCUUGGACACCCUGCU	0.601	0.1
Cluster_1501	24	1:10751661-10752178	518	AAUACCCGAGCCGAAAUGAACGUA	0.208	-1
Cluster_1502	24	1:10754874-10755353	480	AGAAGCUCGAGCCGGCUUGUGAGC	0.245	2
Cluster_1503	24	1:10761936-10762636	701	ACCCGAACACAAUCCGACACACUG	0.571	0.2
Cluster_1504	24	1:10833999-10834126	128	AUUCACUCGUCGGUUCAGGGACCC	0.292	0.7
Cluster_1505	24	1:10838781-10838912	132	GUGGAUCGGUUGGCUCGGACCAUG	0.484	0
Cluster_1507	24	1:10857322-10858233	912	AAAUGAACCGAACACGGAAACACC	0.622	0.1
Cluster_1508	24	1:10858308-10858636	329	AACAGUUAUGAAGUGUUUGAAUGC	0.468	0.2
Cluster_1509	24	1:10859435-10860009	575	AUGAUAACUUUAAAAAAUGGUAGA	0.548	0
Cluster_1510	24	1:10860119-10860496	378	AGAUAAAAACACUUAGUAGAAACC	0.383	0.1
Cluster_1511	24	1:10860857-10861825	969	GAUAAGAUGACUGUUUGACACAUC	0.554	0.3
Cluster_1513	24	1:10873821-10875221	1401	AGAGAGGUAGACAAUGCUGACAUU	0.68	0.1
Cluster_1514	24	1:10878469-10879535	1067	AAAUCUUACCAUAACUGUAUCUCC	0.44	1.4
Cluster_1517	22	1:10961523-10961991	469	UGCUUUCUCAACAUCUGGCAUC	0.134	-1
Cluster_1518	24	1:10963274-10964581	1308	AAGGAUAAAUCUGUUGCACCCAGU	0.667	0.2
Cluster_1519	24	1:10964657-10965327	671	CUCGAUCCAUCGACACAAACCUGC	0.548	0.2
Cluster_1520	24	1:10985377-10985470	94	AAUUCUGAGCUUGGUUUAUGUGCC	0.209	0.2
Cluster_1521	24	1:10991868-10992015	148	CAUGGCCCAUGGGCGGGCACGAGC	0.655	0
Cluster_1522	24	1:10997499-10997894	396	AUUUUCUCUCUAGGGAUUGCAGCU	0.284	0.4
Cluster_1523	24	1:10998252-10999952	1701	AGGUACUGGUAUCUGUUACGAGCC	0.213	4.6
Cluster_1525	24	1:11000626-11001087	462	AUUCCCCACGGGUUGGCGGGUAUC	0.607	0.3
Cluster_1527	24	1:11003606-11004509	904	AGGAUUUAUUUAUUGUAGCCUCCC	0.753	0
Cluster_1528	24	1:11004823-11005193	371	UAUAGGAAAUGUAGUGACACACGG	0.579	0.1
Cluster_1529	24	1:11007168-11007371	204	ACCGGAUGGAGUAGCUUUAGUAGC	0.37	0
Cluster_1531	24	1:11015711-11016347	637	GUUAGUCGUUGUGAACUCUCUUCU	0.519	0.1
Cluster_1532	24	1:11016424-11016926	503	AAUGGACUCCAUGAUGUUUGAGGU	0.618	0
Cluster_1534	24	1:11042326-11042949	624	UGCCUGUUUGGCAGAACCUCUGCU	0.53	0
Cluster_1535	24	1:11044113-11044372	260	AAUUAAUCUGUAUAUAUAACAUCU	0.579	0.1
Cluster_1536	24	1:11045540-11045785	246	AGUCUAGUCAUAUAAUAACUCUCC	0.382	0.2
Cluster_1539	24	1:11064468-11064708	241	AAAUUUCAAUUGCGCUGUUCGGGA	0.208	-1
Cluster_1540	24	1:11067599-11067808	210	AAGUUAGACAGCGAACCAAAUAGU	0.494	0.2
Cluster_1541	24	1:11069298-11070474	1177	CGGGCUCGGACAAGGAAUUGAGCC	0.386	0.7
Cluster_1542	24	1:11070653-11071228	576	UACCAUGUCAUAUGUAGCCAACU	0.581	0.2
Cluster_1543	24	1:11072266-11073054	789	GAUCUAGUCAUCGGAUUGAUUGCC	0.255	0.6
Cluster_1546	24	1:11123336-11123505	170	CGGCCCGAAGCACGGCCCAGGCAC	0.379	0.1
Cluster_1547	24	1:11125901-11126282	382	AUGGAUUGAUGUCAAUAAUAGAGU	0.505	0.1
Cluster_1548	24	1:11132885-11133006	122	ACUAGCUCCGGAACCAAACAGUAC	0.431	0
Cluster_1549	24	1:11134440-11134819	380	AUAAAUAGAGCUCGAUCCUAACCC	0.444	0.4
Cluster_1550	24	1:11138655-11140175	1521	ACCGAACAAGCCCUGAGUUGGAUG	0.505	0.4
Cluster_1551	24	1:11146712-11147416	705	AAAGUCUCUGGUAAUUUAUGAACC	0.592	0
Cluster_1552	24	1:11147625-11148371	747	AACGAUAAGUAUCAGAAUAUGACU	0.572	0.5
Cluster_1553	24	1:11149411-11149608	198	AAAAAUGAGAACCGAAACCGAACC	0.34	0.1
Cluster_1554	24	1:11149703-11150574	872	AUAUCCGAUAUCCGAACCCGUACC	0.417	0.6
Cluster_1555	24	1:11150775-11151177	403	GUAUGAUCUUGGUGCCAUGUUCCU	0.55	0
Cluster_1556	24	1:11153607-11154464	858	CACUCUCGAUGAACUAAGACUCUC	0.489	0.1
Cluster_1557	24	1:11165505-11166376	872	AACCACGGUGCACUUGUGAACGCC	0.52	0.3
Cluster_1558	24	1:11201495-11201833	339	GCACCGGACUGUGAUUGUUCACU	0.667	0
Cluster_1560	24	1:11229452-11230116	665	AUUUCUGAAUAUUCGAUAUCUGAC	0.556	0.4
Cluster_1561	24	1:11286317-11286403	87	AGGAACUUCAAUUUUGCUGCAACC	0.416	0.1
Cluster_1565	24	1:11297219-11297434	216	AUGGACAAGCUUGCACCGUAAGCC	0.657	0.1
Cluster_1566	24	1:11297560-11297775	216	AGAGGACGCUGCUGGAGACGGAGA	0.504	0.1
Cluster_1567	24	1:11305562-11305946	385	CGUAGAAGUAGAGUUCAAGGUGUC	0.383	0.2
Cluster_1569	24	1:11320805-11321439	635	UCACCAGAUGCAAGGCAAUGAGAC	0.71	0.2
Cluster_1570	24	1:11322840-11323513	674	AUCCCUACGGACUAGGCACCCAGC	0.357	1.7
Cluster_1571	24	1:11325944-11326368	425	AGGGACCCCCGAGGUCGAAACACC	0.455	0.3
Cluster_1572	24	1:11350701-11351138	438	ACGACCGACCGUAUCGCAGGAA	0.558	0
Cluster_1573	24	1:11351750-11352184	435	ACAUUUUGGGUGGCAUACCGACUC	0.585	0.1
Cluster_1574	24	1:11352264-11352996	733	AUCCACGUCUGGAUUAAUUCCACU	0.576	0.2
Cluster_1575	24	1:11357471-11358820	1350	GUAUCAUCACAUCUUGGACUACC	0.416	0.6
Cluster_1578	24	1:11400211-11400486	276	AUAGGACUUCCUAGCUCGGCACCA	0.119	-1
Cluster_1579	24	1:11401121-11401580	460	AGAUCUGUGGCACUGACCUAGAAG	0.399	0.3
Cluster_1581	24	1:11404509-11405386	878	AUUAUGGAGAACAAUCUAUGGGCC	0.621	0.1
Cluster_1583	24	1:11411272-11412193	922	ACUGAUUCUGUACACACAUGGACC	0.228	10.1
Cluster_1585	24	1:11414718-11415525	808	AGGUCCCGGAACGUCCAACCCUGC	0.53	0.1
Cluster_1587	24	1:11417413-11418470	1058	AGACAUGUGGCACGACAAAACAGU	0.473	0.2
Cluster_1588	24	1:11430205-11430568	364	GGCUAUCCGGACUGGUUACGUAGA	0.705	0.1
Cluster_1590	24	1:11438850-11440020	1171	AACAGGACUAGAAGUCGAGUCUCC	0.479	0.2
Cluster_1593	24	1:11490256-11490831	576	AUUUCAAAUUAAUCUGUUGUACGU	0.463	0.2
Cluster_1594	24	1:11495312-11496210	899	UUUCCCCGUCGGGAAAUGGCUCCC	0.592	0.2
Cluster_1595	24	1:11550882-11551131	250	AGUCGAGCCGAGCUGCUGCGAGCC	0.199	0.2
Cluster_1596	24	1:11551976-11552212	237	AACCGUGCACCGUGGACGUCUACA	0.264	0.5
Cluster_1598	24	1:11583282-11583999	718	AUUGCCAUGUGGCACCUGCUCAAC	0.387	0.7
Cluster_1600	24	1:11595960-11596249	290	AAAUCUGAAAGCACCCCUGGAUCU	0.538	0.2
Cluster_1601	24	1:11596332-11596608	277	ACUGGCCCCUAGCACUGACGGAAC	0.541	0.1
Cluster_1602	24	1:11607060-11607315	256	GAACGUGCCGCAGACUUUGAGCUC	0.402	0.1
Cluster_1603	24	1:11607796-11608037	242	GCUACGAUUGUUAGCUAUAUUCGC	0.494	0
Cluster_1604	24	1:11617603-11618095	493	ACGUAAUAGACACUCGGCAAAGCC	0.512	0.1
Cluster_1608	24	1:11659808-11660041	234	ACUCAAGAGAACUAGCGGCGGUGC	0.233	-1
Cluster_1609	24	1:11660471-11661451	981	AACAUCAGGUUGUGGUGCUGCAUC	0.354	1.3
Cluster_1610	24	1:11661690-11662154	465	AGAAAUAAAGUCCGAUCCUAACCC	0.327	0.5
Cluster_1611	24	1:11664663-11665028	366	ACAGUUUGUCGAGAAUUCUUUGUC	0.299	1.8
Cluster_1612	24	1:11667763-11668059	297	AAAAAUGUGUAGCGAUUUUGGCAU	0.274	0
Cluster_1614	24	1:11669439-11670068	630	CAGGGCAUGGGUUCGAACCCCACU	0.507	0.2
Cluster_1616	24	1:11678930-11679548	619	AUUCCGUAGGUCACUUGGACUCGU	0.46	0.3
Cluster_1618	24	1:11710949-11711249	301	AGAGGCACGAGAAGUCGUAGAAGC	0.475	0
Cluster_1619	24	1:11714858-11715212	355	ACAUAAACUGGUAUGUUUGGAACC	0.372	0.4
Cluster_1620	24	1:11715468-11715712	245	AUUUUACGAGGAAUCCCUUCCACC	0.439	0.1
Cluster_1621	24	1:11717841-11718531	691	AUAUGCAUGAGAAAUAUGAGAAUC	0.538	0
Cluster_1622	24	1:11718657-11719308	652	AACGCACCCAUAGGAUCUUCCUGC	0.395	0.7
Cluster_1624	24	1:11722209-11722708	500	GAAAUUUUGUCCAAACCUGUACCC	0.614	0.1
Cluster_1625	24	1:11725145-11725892	748	ACCAUGACUGAAGAAGCAAGCACC	0.436	0.6
Cluster_1626	24	1:11726230-11726831	602	AUCUACUAACAAUUACUCGUGGCC	0.404	0.2
Cluster_1628	24	1:11728039-11728683	645	GUUGGACAGCUGCACGUACACACC	0.508	0
Cluster_1630	24	1:11740115-11740376	262	AUUGAUUCUAUAGAUUUACAUGGU	0.643	0
Cluster_1631	24	1:11740635-11741290	656	AUACGGGUAUGAGACAAAAAUUGU	0.35	1.1
Cluster_1632	24	1:11741555-11742458	904	ACCUGAGCGGCAAGCGUUGUGUGC	0.615	0.3
Cluster_1635	24	1:11761322-11761566	245	AGAGGAGGAUGAUAUGACCACGCC	0.792	0
Cluster_1640	24	1:11796694-11797074	381	AUGAUUUAACAUUGUUUCUGGAGC	0.618	0.1
Cluster_1645	24	1:11888728-11889354	627	AAUCCACAUAGAAUUGAAAUAACC	0.543	0.1
Cluster_1646	24	1:11889870-11891176	1307	AGGAACCGAACUCGAAUAGACCGA	0.551	0.5
Cluster_1648	24	1:11937499-11937721	223	GAGGGACGAGCAAACGAACAUGCU	0.531	0
Cluster_1651	24	1:11951915-11952332	418	AGCUUCUUGUUAUUAUGAUAUCCC	0.236	1
Cluster_1654	24	1:11957678-11960378	2701	AGGUUAGGCUGAAAUUCCAUAAAG	0.701	0.3
Cluster_1655	24	1:11960511-11961034	524	ACGUGGAGCACCCAAACUUGACCC	0.73	0
Cluster_1656	24	1:11961240-11962457	1218	AACAGUAGUCAUAUGCGCAACAAG	0.867	0.1
Cluster_1658	24	1:11964671-11965014	344	GAGUCUGUCUAAAUUUACCACUGC	0.74	0.1
Cluster_1659	24	1:11965123-11966667	1545	AGGACUUAGACAAAGAGAGAGGCC	0.731	0.1
Cluster_1660	24	1:11966759-11967737	979	CUCGAGACCUCUGGCUCUGAUACC	0.679	0.1
Cluster_1662	24	1:11969507-11971036	1530	AGGAGAUAAGGAUAUCUAGCUAGA	0.806	0.1
Cluster_1665	24	1:11973363-11974038	676	ACCCGAACACGGAAUACCCGAACC	0.778	0.1
Cluster_1667	24	1:11974766-11975872	1107	CCAAUUUCGCGGCGGCGUCCUGAC	0.741	0.1
Cluster_1668	24	1:11976255-11976836	582	CCUGAUGUGCAUACCUGGAGGUUC	0.735	0.3
Cluster_1669	24	1:11977160-11978579	1420	GUUAUGGGCGUACUUUGGACCACC	0.703	0
Cluster_1670	24	1:11979128-11981095	1968	AUGGAACUUUGCCAUGUUGCUCGU	0.636	0.2
Cluster_1671	24	1:11984553-11986107	1555	AAUUUUUGUCUCAUACCCAUACCC	0.535	0.5
Cluster_1672	24	1:11986407-11986941	535	AGCUAUGUUUACGAUGAAGACAUC	0.681	0
Cluster_1673	24	1:12040166-12041246	1081	GACGACUGUAGAUGGUGACGGGGC	0.596	0.2
Cluster_1675	22	1:12054888-12055017	130	AUUCUCGUUAUUGUCUCAUCUC	0.333	-1
Cluster_1677	24	1:12069810-12070170	361	CGACAAAAAGCACUCGGCAAAGCU	0.694	0
Cluster_1679	24	1:12102809-12102879	71	UAUAGAAUAAAUAUGACCGUACA	0.659	-1
Cluster_1680	22	1:12117976-12118166	191	AUCGAACACUACGUCGCGCGCC	0.545	-1
Cluster_1681	24	1:12151334-12151664	331	AUCGUACUCGACAACAUGGACACU	0.504	0
Cluster_1683	24	1:12152710-12153686	977	GAGGGACCCGAGGGCUUAUCUUGC	0.644	0.2
Cluster_1686	24	1:12209454-12209865	412	CGGUCUGUCGUGCUUCGGGCCGAC	0.348	0.1
Cluster_1687	24	1:12228519-12228767	249	ACUAUGUUUUAUUCUUAUCGAGCU	0.812	0
Cluster_1688	24	1:12235401-12235770	370	GAUGGAGGACGACAUCCACGAGCC	0.504	0.1
Cluster_1689	24	1:12238036-12238322	287	UUAGUUUUGCACACACCGGACCGA	0.625	0
Cluster_1690	24	1:12251536-12251902	367	AGCAACUCCUGACUUGGGGCACUC	0.372	0.4
Cluster_1691	24	1:12256609-12256772	164	GAAAAAGCACGGCCUAGGCACGAC	0.432	0.1
Cluster_1692	24	1:12271723-12271763	41	CUUCUUUAGUGGACCCAGUGGAUA	0.305	-1
Cluster_1694	24	1:12278827-12278919	93	UCGGACCGUGGACCGACCCGACAC	0.328	0.2
Cluster_1695	24	1:12279000-12279322	323	AAUCUCUACUACUACAUAAGAAGC	0.313	0.7
Cluster_1697	24	1:12288118-12288566	449	AUUGUCUGUGCUCAACAUUAAACC	0.483	0.1
Cluster_1698	24	1:12296977-12297479	503	AGAGACUAUAUUCACUCAACUCCC	0.422	0.3
Cluster_1699	24	1:12298223-12298972	750	CAUACACAGCCAUAACGGGCGCUC	0.416	1
Cluster_1702	24	1:12329440-12330503	1064	AUCUGUAUAAAUUACAACUGCACC	0.423	0.3
Cluster_1703	24	1:12333960-12334501	542	GGUUUAAGGAAUGAAGUGACUCAU	0.76	0.1
Cluster_1704	24	1:12334653-12335185	533	AAUAGAUCGUAGCAUCAACCUCGA	0.719	0.1
Cluster_1706	24	1:12343383-12343613	231	GAAUAUAGGGGAUGGAAUCUUGCU	0.541	0.1
Cluster_1707	24	1:12343787-12344296	510	ACACGACAAGUGGAAUUUGGUUCG	0.699	0
Cluster_1709	24	1:12352511-12352984	474	CAGUCUCCCCCUUCCUCGCGCAGC	0.556	0.2
Cluster_1711	24	1:12362047-12363447	1401	CGCCUGUCACUGCGCUGACGAGAA	0.513	0.3
Cluster_1712	24	1:12363550-12364254	705	AUGCACUAACCAACUCAAAAGCCU	0.584	0.4
Cluster_1713	24	1:12367751-12368345	595	AAUACACCUUAUACCACCUCAAUC	0.618	0.3
Cluster_1714	24	1:12377253-12377754	502	AGGGACAUCUAAGCGAUGCUGAGC	0.331	0.9
Cluster_1715	24	1:12378472-12378895	424	AACCAGGCUGUCGGGUACGUCACC	0.383	0.7
Cluster_1716	24	1:12378985-12380080	1096	GUUUUCCAUCGACUGUAUCGGCCU	0.526	0.4
Cluster_1718	24	1:12385786-12386218	433	GUUUUGGCAGAACCGUGCACCAUC	0.638	0
Cluster_1719	24	1:12389900-12390196	297	CAAGUUGGCGAGCGAAACGGAGGC	0.325	0.5
Cluster_1720	24	1:12391715-12392356	642	ACAUCUGUUGUAGUCUGCCCGAGU	0.654	0
Cluster_1721	24	1:12392927-12393135	209	AGAUACAGAACGAUAAACAUCAAU	0.509	0.6
Cluster_1722	24	1:12394543-12394912	370	GUGUCGGAUUACACCCGGAAUCGU	0.266	0.7
Cluster_1725	24	1:12395904-12396328	425	AUCUGCUUUGCGCACGCGCGGACC	0.586	0.2
Cluster_1726	24	1:12396422-12396816	395	GUUUGUGUUGAGUGAUUGGCGCCC	0.552	0.1
Cluster_1730	24	1:12401380-12401955	576	ACUUGCUGGGGAGAAUUUUUCGGU	0.492	0.3
Cluster_1731	24	1:12402248-12403032	785	AACGAGAAUAUAGAAGCAAGCCUU	0.609	0
Cluster_1732	24	1:12403363-12403767	405	AUCUCCGACGGCCUCGUAGGCAGC	0.411	0.9
Cluster_1734	24	1:12430072-12430304	233	AUUGGUUAUCUUGUCUUCGAUUAU	0.628	0
Cluster_1735	24	1:12430896-12431281	386	AUAUGUAUCUGAUCCCAAAUCCGU	0.591	0
Cluster_1737	24	1:12437082-12437579	498	AGCACUCGGCAAAGAAGGCUCGGC	0.237	1.5
Cluster_1738	24	1:12438322-12438570	249	AAACAAUCUAAACUAUGGAGCAGA	0.447	0
Cluster_1740	24	1:12439467-12439884	418	ACUACCGGAAUUCGGCUCAUUGCC	0.468	0.2
Cluster_1741	24	1:12440438-12441906	1469	GUAUAAUCUAGACUAACAAACAGC	0.602	0.3
Cluster_1743	24	1:12451096-12451473	378	ACACGUGGGCCUCCGAGUUGGACG	0.585	0.1
Cluster_1745	22	1:12480355-12482019	1665	UGUCAACAUCUCCCAUAUUCU	0.253	-1
Cluster_1746	24	1:12482097-12482711	615	AGCCUGGCACCGGUUAGUCUGACC	0.593	0.1
Cluster_1749	24	1:12501163-12501799	637	GAACGGACGACUGAGCGCGCGAGU	0.552	0.1
Cluster_1750	24	1:12502174-12502360	187	AUGUCAUUGACUCAUGUGCACCCA	0.398	0
Cluster_1752	24	1:12513583-12514321	739	ACAUCGGAUAUGACACUUAGAGAG	0.372	0.3
Cluster_1754	24	1:12527833-12528134	302	CAAUGCAGCACCCCUACCUGGCGU	0.705	0
Cluster_1756	24	1:12542992-12543161	170	AAUUCGUAGAGACAAAACACUUCU	0.465	0.1
Cluster_1757	24	1:12543351-12543769	419	AGCCUUGGAGUCCAUGUAGCGAGC	0.577	0.1
Cluster_1760	24	1:12545897-12546315	419	AGAAAUCGUUCCGACCCAUCAAUC	0.223	2.8
Cluster_1761	24	1:12552566-12553250	685	AUUCGGCUAGGAAUCGUUCCGACC	0.243	1.9
Cluster_1763	24	1:12555441-12555864	424	AAACGCAGGCUGUAUGGACAGAUG	0.204	0.9
Cluster_1766	24	1:12557570-12557841	272	AAAAACUCGGAACCCUAAACUGCU	0.371	0.7
Cluster_1767	24	1:12587816-12588343	528	CCUCUGCACAGGGGCGGACGGUCU	0.629	0
Cluster_1769	24	1:12609708-12609928	221	ACAAAGGUGUCGGUAGCAUGAGCC	0.288	-1
Cluster_1770	24	1:12613467-12613501	35	CAAAAUAUUGUUAAACUCUCGAGU	0.224	-1
Cluster_1772	24	1:12614572-12615007	436	AGCAAUCCGGUCCGGAAUCGUUCC	0.192	0.7
Cluster_1773	24	1:12617251-12617996	746	UGUAGCCAACAACGCAUAAACAGU	0.763	0
Cluster_1775	24	1:12626294-12627294	1001	ACGAUGGUACAUGAGCGUAAACCU	0.72	0.1
Cluster_1778	24	1:12635063-12635959	897	GAUGACUGGAGCUGGACGGCACCA	0.711	0
Cluster_1780	24	1:12645919-12646210	292	GUAGGGAUGUAGGCCAUAAUCAUC	0.738	0
Cluster_1781	24	1:12648862-12649126	265	AGGACAGUGAAUAGUCGCAGCGCC	0.549	0
Cluster_1782	24	1:12656727-12657234	508	ACCUAAUGUGGGCACCUGAUGCUA	0.697	0
Cluster_1783	24	1:12657318-12657981	664	CACCCUAUAGCCGCAGCGGUGCC	0.407	0.3
Cluster_1786	24	1:12677089-12678740	1652	AGGCUAAAGUGGAACCGAAGUGCC	0.704	0.1
Cluster_1787	24	1:12678847-12679450	604	ACCUCCUGGAUGUGUUAAGGGCCU	0.571	0.1
Cluster_1788	24	1:12679989-12680628	640	ACAGAGUAGGGACUAAACUUUAGU	0.438	0.7
Cluster_1789	24	1:12699375-12699579	205	UCAGGCACUCGGCAAAGGCGACGA	0.65	0
Cluster_1790	24	1:12702236-12703272	1037	AUCACCACGAGAAGAUCAUCCGUC	0.459	0.7
Cluster_1791	24	1:12704084-12704701	618	AUCCGGCUAGGAAUCGUUCCGACC	0.26	0.9
Cluster_1792	24	1:12705173-12705518	346	AUCACCAGUCGUCGUCGACGCACC	0.623	0
Cluster_1793	24	1:12705995-12707001	1007	AGGGCACACGAGGACUCCGCCGCC	0.512	0.7
Cluster_1794	24	1:12716459-12717102	644	AAUAUUACUGGUAUAUAGCUCGUG	0.556	0.1
Cluster_1796	24	1:12724948-12725586	639	ACAGGCCCGCCGUGCCUCCGGCCC	0.434	0.7
Cluster_1799	24	1:12763962-12765543	1582	GCCACGGAUGGACACAACAUGACC	0.252	5.1
Cluster_1800	24	1:12765913-12766928	1016	UAUAGAAACGAAAUGGAAACGGGA	0.605	0.2
Cluster_1801	24	1:12767016-12767347	332	ACUAAUAUGAGAAAUGAGGUCAUC	0.5	0.2
Cluster_1803	24	1:12767777-12768108	332	CAGGUGAGUGUGGUCGGGGCUCCC	0.371	0.1
Cluster_1804	24	1:12772113-12772766	654	AUCCGAUCGUGCACGGUUCUGGCU	0.549	0.1
Cluster_1808	24	1:12792278-12792455	178	AUUCACAUGGAUUGAGAGCUAACC	0.628	0.1
Cluster_1809	24	1:12793525-12794740	1216	CCGCACCUUAGAAUCUCUCUACGU	0.449	0.6
Cluster_1810	24	1:12795659-12796981	1323	GUCGAGCUCGUCACCCAGAGCGCC	0.64	0.2
Cluster_1811	24	1:12797071-12798972	1902	AGGACAUAUUAGGAUAACAGGCAC	0.543	1
Cluster_1812	24	1:12799140-12800121	982	AUUCAGCCUGCAUAGCGGAGCGCC	0.378	3.5
Cluster_1820	24	1:12844145-12844671	527	AAUACUCUUGCUCUCAAACAAGCC	0.694	0.1
Cluster_1822	24	1:12847301-12847642	342	AAUUUUUUCCAAUCCCAUCCUAUC	0.264	1.4
Cluster_1823	24	1:12851528-12852434	907	UAUACAUGAAGAGCCUUGGCGCAC	0.373	0.5
Cluster_1824	24	1:12920831-12921746	916	ACAUACGGAAAGUAAAACUUUAGU	0.716	0.1
Cluster_1825	24	1:12922132-12922684	553	AGGGAUAAAGGACCUGACCGUCCU	0.382	1.3
Cluster_1826	24	1:12927841-12928408	568	ACCUCACGCCAGGCUGUCAGGUGC	0.561	0.1
Cluster_1828	24	1:12931788-12932025	238	AGACGGACACGCAUCCAGUGCAGC	0.518	0
Cluster_1832	24	1:12990003-12990132	130	AACAAUUCGGACAGUAAUCGUUCC	0.528	0.1
Cluster_1834	24	1:13003701-13004453	753	AGCGACUGUCUGCUGCCAUGUGCC	0.533	0.1
Cluster_1836	24	1:13024941-13026026	1086	ACCACAGCGGUGGUGUGGACGCCU	0.59	0.7
Cluster_1838	24	1:13031930-13033074	1145	ACGAAACAUAGUAGAUGUGGAUUC	0.499	0.1
Cluster_1840	24	1:13049342-13049944	603	ACACACCACCGUGAUUAGCGCGCC	0.602	0
Cluster_1842	24	1:13056062-13056738	677	AUAUUUCCGUUGUAACGCACGGCC	0.373	0.5
Cluster_1843	24	1:13061437-13062286	850	AUCUCUACAACUAUUAAGACUCGU	0.43	0.6
Cluster_1844	24	1:13063468-13063991	524	AGAUACAGGCAACCAUACACACCC	0.368	0.6
Cluster_1845	24	1:13064863-13065131	269	ACACUAUAGAAAACGUGGCCGCCU	0.253	0.5
Cluster_1846	24	1:13065762-13066473	712	ACUAGUCUUCCAUAAUACUCGACC	0.508	0.3
Cluster_1847	24	1:13070184-13071110	927	AACUCGGGUCACAGCUGAACGCGC	0.307	2.6
Cluster_1848	24	1:13076040-13077162	1123	ACUUGUUCCUGUGAGACACGAACC	0.707	0.1
Cluster_1849	24	1:13104715-13105344	630	AAAACGUCAACCCUGUAAGGACCC	0.52	-1
Cluster_1852	24	1:13136105-13136397	293	CUACUUGUAUGGGUUUUUGAGAUU	0.672	0.1
Cluster_1853	24	1:13140319-13140718	400	AAUCAACCCGUUGAAGGAUAGCCU	0.486	0.1
Cluster_1854	24	1:13140808-13141665	858	GUUUCCUGUAGCGAACUAGGGGCC	0.596	0.1
Cluster_1855	24	1:13141817-13141939	123	UACUAACCAUACCCGUGUACCCGU	0.483	0
Cluster_1856	24	1:13152638-13152972	335	CUGCGACUCCGCCACUGAUGGCAC	0.638	0
Cluster_1857	24	1:13159171-13159724	554	UUUUUCCUGAUAUUAUGUUUCUGC	0.667	0
Cluster_1858	24	1:13170211-13171600	1390	AGAAGACCGACGAACAGGAUGACC	0.67	0.3
Cluster_1859	24	1:13172349-13172790	442	AGUGUUUGUCGUAACAACCGAGUA	0.31	0.5
Cluster_1860	24	1:13183768-13184432	665	AAGUGCUCUAGAACAACGGAAACU	0.614	0.2
Cluster_1863	24	1:13188775-13189204	430	AUUUUCCCCCUAUUUUUCAUCUCC	0.776	0.1
Cluster_1864	24	1:13198705-13200103	1399	AGGAGUCCCGCCGCGUAGAGCGCC	0.302	6.4
Cluster_1865	24	1:13200282-13200589	308	ACUGACGUGUAGUGAGGCAACCGA	0.276	0.5
Cluster_1866	24	1:13200681-13201186	506	AACAGAUUCUCUAACUUAGUAGGU	0.569	0
Cluster_1867	24	1:13202265-13202464	200	AACUCUAGCCUCGCACCAGGUCGC	0.556	0.1
Cluster_1869	24	1:13203165-13203372	208	GAGUUUGAGUGUGAGUUUGUACC	0.366	0.2
Cluster_1871	22	1:13234825-13234965	141	UAUGUAUAGGUUCUGAAAAGGC	0.339	-1
Cluster_1874	24	1:13246776-13247237	462	AAUUCAACAAUAGGAACAACUACC	0.53	0.1
Cluster_1876	24	1:13249318-13249622	305	AUUACCGAGAGCAGGAGUUUGCCG	0.515	0.5
Cluster_1877	24	1:13250181-13250540	360	CGCUCAAACUUGAGAAUUUUACGA	0.659	0.1
Cluster_1879	24	1:13264056-13264445	390	GUAUUAAGUUCGGCAACGAUGAGU	0.58	0.1
Cluster_1889	24	1:13353338-13353513	176	GAUUUAUCAUGUGAGUUUUUGGCC	0.583	0.2
Cluster_1890	24	1:13355572-13355709	138	UUGCGACAGCUCACAACAAUAACC	0.339	0.1
Cluster_1893	24	1:13366408-13366715	308	GUUUUCUUUGGCCCUGUCUUGCCC	0.535	0.1
Cluster_1895	24	1:13369357-13369750	394	ACCGAGAGUAGGACUUUGCCGAGU	0.635	0
Cluster_1896	24	1:13370128-13370830	703	UUAGAGAUGAAACGAACAAAGCCU	0.739	0
Cluster_1897	24	1:13371649-13372073	425	ACGGAUGUACAGUUCGUCGAGAUU	0.561	0
Cluster_1901	24	1:13378804-13379302	499	AGUACGAUGUCACGUAAGACCCCC	0.697	0
Cluster_1904	24	1:13387548-13388052	505	AUUAGAGAUGAAACGAACAAAGCC	0.769	0
Cluster_1905	24	1:13389009-13389420	412	AAUCUCGACGAACUGUACAUCCGU	0.655	0.1
Cluster_1909	24	1:13422883-13423322	440	AACCGACUAGUAUAGUUUUAUGCC	0.629	0.1
Cluster_1910	24	1:13424347-13424752	406	UAGUAGGCACUCGGCAAAGGAGAC	0.507	0.1
Cluster_1911	24	1:13428521-13428618	98	GACACUCGGCAAAGGACUCUUUGC	0.52	0
Cluster_1912	24	1:13429603-13429916	314	GCACUCGGCAAACAUGGCUCUCA	0.394	0.9
Cluster_1913	24	1:13430012-13430406	395	AACAUAGGCAGCAAAUCAGAGACC	0.7	0.1
Cluster_1915	24	1:13454914-13456136	1223	CAGUUUACACUUCACAAAACUCAU	0.563	0.3
Cluster_1917	24	1:13460678-13461045	368	UGGAGAAGCUGGCCACAUGUGAGC	0.347	0.4
Cluster_1918	24	1:13462072-13463409	1338	AUCGAAAUCGUGCACCGGUGGUCC	0.608	0.2
Cluster_1919	24	1:13463696-13464635	940	CCCGAGACCGUACAGUGACCCUGC	0.59	0.1
Cluster_1920	24	1:13464764-13465106	343	AUGACACUCGGCAAAGUCUUUGUC	0.459	0.1
Cluster_1921	24	1:13473826-13474323	498	ACGGCUGGCACUCGGCACAGAACC	0.388	0.2
Cluster_1922	24	1:13483299-13484045	747	AAUUAACCGUUGCCUAGGCACACC	0.367	0.4
Cluster_1924	24	1:13527335-13528164	830	AUAUUAUAUUCCAGCACGACCCGC	0.243	0.6
Cluster_1925	24	1:13533777-13534224	448	CUGUUGCAACGCACGGGCACCCAC	0.517	0.1
Cluster_1926	24	1:13534313-13535135	823	AGCACUCGGCAAAGAGCCUGGCAC	0.333	1
Cluster_1928	24	1:13559349-13559645	297	GCCGAUGCACUGUAUGCCGAGCCC	0.718	0.1
Cluster_1930	24	1:13569671-13570385	715	AGGUAACUGUUACAACCUACACGA	0.634	0.2
Cluster_1931	24	1:13570603-13571131	529	AUCCGUCAUGGCAAGGAAAAUCU	0.676	0.1
Cluster_1933	24	1:13574170-13574528	359	AUCGUCGCCGUACGCGUGGCUGCC	0.416	0.3
Cluster_1935	24	1:13576150-13576299	150	AACGCACGGACAUAUACCUAUAUA	0.522	0
Cluster_1937	24	1:13582162-13583042	881	ACAACGAACCACCCUAGGGAGAAC	0.771	0.1
Cluster_1941	24	1:13587546-13588533	988	UUCGGAUUCGUUGGCAGAACCAGU	0.73	0.1
Cluster_1942	24	1:13588650-13589970	1321	AUCCGCCAUGGCGUGGUCGGCACC	0.644	0.3
Cluster_1943	24	1:13601110-13601283	174	AAGCGCACCCACUCUGACGCAGGA	0.22	0.6
Cluster_1947	24	1:13618455-13618991	537	AACGGACAAAAAAGUCUUUGCACC	0.62	0.1
Cluster_1948	24	1:13622216-13622989	774	ACACUGUACAAAAACUGGCACCAA	0.244	-1
Cluster_1952	24	1:13690557-13690838	282	AAAUACACCCGUUAAGAUACCCAC	0.508	0.2
Cluster_1953	24	1:13694607-13695113	507	AAACGAGCCGAUUCGAGCCGAGCC	0.431	0.3
Cluster_1954	24	1:13725736-13725836	101	AAAGACCAAGGAAUGUAUUUAGUU	0.472	0.1
Cluster_1955	24	1:13726043-13726545	503	AAAUCCCAUGGUCAGCGAACUAGC	0.512	0.4
Cluster_1956	24	1:13757924-13758191	268	AAGGAGAGAAGAGCACCAUUCGGG	0.694	0
Cluster_1957	24	1:13758426-13758998	573	AUAGAUCCGGAACGUGAUAGCAUA	0.329	0.3
Cluster_1958	24	1:13762500-13763241	742	UAAUGAACCUGAUACAUAUAUCUU	0.601	0.1
Cluster_1959	24	1:13765747-13765827	81	CACACAAACGCCACACCAGUUCGC	0.531	0
Cluster_1961	24	1:13768902-13768980	79	CAAACGCCACACCAGUUCGCGCAC	0.652	0
Cluster_1962	24	1:13769161-13769456	296	AGCCGACCGGGACUCGAGAGCGCU	0.545	0.2
Cluster_1964	24	1:13772057-13772142	86	GUUCAUUACGUACACACAAACGCC	0.611	0
Cluster_1966	24	1:13777103-13777510	408	UCGCCGGCGGCACCUGGAUCUCGC	0.621	0
Cluster_1968	24	1:13785318-13785792	475	AAGAUCACAUGAGAGCCAUGAUUU	0.65	0
Cluster_1970	24	1:13808437-13808829	393	UGGCAGAACACGGGAAUGACCGAC	0.407	0.2
Cluster_1971	24	1:13809329-13809435	107	GCACCCGGCACAGCUGCAGGAACC	0.259	-1
Cluster_1972	24	1:13817388-13817844	457	AAAUUAAAAUAUGAGGCUCUACGC	0.541	0
Cluster_1974	24	1:13821691-13821921	231	CAGAGGUCUCGAGUUUGAAUCC	0.525	0
Cluster_1976	24	1:13867604-13867771	168	AUCAGAAGGAGUAGAUGAGCACCC	0.343	0.2
Cluster_1977	24	1:13867875-13868141	267	GUGCUUUAGGACUGGACCGGACCU	0.66	0
Cluster_1978	24	1:13868220-13868528	309	AUUUUUCGUGUCAAGUCUUGCUUC	0.322	0.7
Cluster_1979	24	1:13869559-13870589	1031	UUGGCCCGACACGAACAGUACACC	0.227	3.2
Cluster_1980	24	1:13871323-13871514	192	AUCCCGAGAGGAUUGAAGGGGAUU	0.47	0.2
Cluster_1981	24	1:13898320-13899494	1175	ACGAACAUGGCUCGACACGCACCC	0.356	0.9
Cluster_1982	24	1:13902760-13902919	160	AAUACCGAAAGUCCAAUUACAAUG	0.717	0
Cluster_1983	24	1:13913261-13913649	389	AAACUUCCGACGGGAUGACUUAAC	0.512	0
Cluster_1984	24	1:13962552-13962779	228	GAUUAUCACCGGCCGCCUAGCUGC	0.444	0.4
Cluster_1989	24	1:13965872-13966209	338	ACCUGUACUGCUUGCUUAUUUGUU	0.389	0.2
Cluster_1994	24	1:14020776-14021474	699	ACCUACAGCAGACUUAGACGCGCC	0.703	0
Cluster_1995	24	1:14022046-14023017	972	UGCUUGGCGUAGGCGGUCUGGC	0.763	0.1
Cluster_1996	24	1:14023974-14024810	837	CAACCCGCAGCAGAACGGCGUC	0.795	0
Cluster_1998	24	1:14031065-14031305	241	ACUCUUAGGGCUAGUUUGAGAACC	0.24	0.2
Cluster_2000	24	1:14073336-14073689	354	CCCUGCUUUCGUUGGGGGCUCAGC	0.694	0
Cluster_2001	24	1:14073951-14074121	171	UCAGGCAGGGAACCCGAGCUCCUU	0.493	0.2
Cluster_2003	24	1:14077896-14078075	180	AAGAACCGGCGGCGGUGCUCUCUU	0.271	0.2
Cluster_2005	24	1:14081067-14081592	526	AACAGAUGCAAAGUUGCCGGAGAC	0.688	0
Cluster_2011	24	1:14127641-14127970	330	AUUGUCGAGCCCGUCGAACCUCGU	0.323	0.4
Cluster_2013	24	1:14206321-14206646	326	AUUUCCUUGUGAUUUGUUUUCGCC	0.508	0.1
Cluster_2014	24	1:14206798-14207772	975	GCCUGCGGCACACGUUUGAACGUA	0.337	1.3
Cluster_2015	24	1:14212689-14212924	236	AGUGUAGUAUCUGUUCUUAUCAGU	0.314	0.6
Cluster_2016	24	1:14213597-14214235	639	AGUAGGCACUCACUCUAUCAGGGU	0.316	0.5
Cluster_2017	24	1:14224673-14225252	580	AUUCUUCUCAGAUCUGGAACCAUC	0.37	0.5
Cluster_2018	24	1:14250466-14250996	531	ACUUGCUUGGGAUUUAAACUCACU	0.51	0.2
Cluster_2020	24	1:14254165-14254489	325	AUUAUUUCGUGUCGGGCCGUGCUU	0.361	0.2
Cluster_2021	24	1:14254577-14255841	1265	AGUGACACGCUAGAUCUGAGGGGA	0.488	0.7
Cluster_2023	24	1:14256971-14257204	234	AGUGAACAGUGCAAUUCAGAAGUC	0.683	0.1
Cluster_2025	24	1:14305778-14306367	590	AUUGGUAUCGGAGCCAGGUUGGCC	0.371	0.4
Cluster_2027	24	1:14310956-14311434	479	CAUUUACGUUACAUUUUAGGAACC	0.4	0.8
Cluster_2028	24	1:14315176-14315850	675	UGAAGAUGUUAGCCAUAGGAUC	0.631	0.1
Cluster_2030	24	1:14366188-14366367	180	AUUUUUGGGCCGUGCUCGUGCUGG	0.514	0.1
Cluster_2031	24	1:14366630-14366849	220	AAAUUGUUUGAGCUUUCUUGGCCC	0.215	-1
Cluster_2032	24	1:14367584-14368887	1304	AAACAGGAUUCGAACUCGUGACCU	0.517	0.4
Cluster_2033	24	1:14369231-14369929	699	GCUUAUGCGACUAGUGGUACACGC	0.75	0.1
Cluster_2034	24	1:14415787-14416712	926	AAACGACGUGCCAUUAGAGCCAGA	0.692	0.1
Cluster_2035	24	1:14416935-14417814	880	ACGUAGAAAGGCCACGAUCGCACA	0.346	0.9
Cluster_2036	24	1:14417951-14418767	817	AAUUUCUUCAGAUCGCUCGAUCGU	0.634	0
Cluster_2038	24	1:14493885-14494137	253	AAAUAGAGCUCGAUCUUAACUCGA	0.537	0.2
Cluster_2039	24	1:14494716-14495186	471	CAACAACGCUCGGCAAAGGGACGU	0.475	0.1
Cluster_2040	24	1:14521439-14522091	653	ACUAUAAAUAGAAGAACAAUGCC	0.558	0.3
Cluster_2041	24	1:14522905-14523432	528	AUAUUCAGGUACUGACUGAGUCCC	0.838	0.1
Cluster_2042	24	1:14575847-14576666	820	GACUUACCACCCUGUCGGUACCCU	0.526	0.2
Cluster_2043	24	1:14577569-14578342	774	CAGCACUUUAGGGACCGAUGGAGC	0.716	0.1
Cluster_2044	24	1:14582274-14582387	114	UUACACUCGGCAAAGAACACUCGA	0.259	-1
Cluster_2045	24	1:14583388-14583928	541	AAAUAUCAAUACUGACUGAUAGCC	0.562	0.2
Cluster_2049	24	1:14603109-14603369	261	GUUUCUCUGAAGUCAUAGGCACCA	0.695	0.2
Cluster_2051	24	1:14616078-14616620	543	GUUAAUGAACCGAGCUAGGAUAUC	0.545	0.2
Cluster_2052	24	1:14617479-14619061	1583	AUUGUGCACUAACAUUUUAUCAAA	0.724	0.5
Cluster_2054	24	1:14645368-14645772	405	UCUGAGUCCGAGGAUGAGGUAGCC	0.258	0.5
Cluster_2055	24	1:14647131-14647405	275	UUGGUACCACGUCGGCGCCACGAC	0.494	0.2
Cluster_2056	24	1:14648020-14648907	888	ACAUCCACUGUGAGACUUGAACCC	0.365	0.3
Cluster_2058	24	1:14650128-14651385	1258	GACGGCUUGGAGAAGCUGGGCUGC	0.529	0.6
Cluster_2059	24	1:14654395-14655326	932	AGACGACAUGAACGAGUUAACUUC	0.557	0.2
Cluster_2060	24	1:14657049-14657240	192	AUAAGACGCUUUUCGGCUCACUCC	0.432	0
Cluster_2061	24	1:14657503-14658076	574	AGUUGUUGCGGACUGUCAAACGCC	0.373	2
Cluster_2062	24	1:14658432-14659061	630	CGACCCAAGAGUAGGGCUCAGGCC	0.3	0.4
Cluster_2064	24	1:14696332-14696884	553	AGGGCAGAACGGCAGAACACGGGG	0.716	0
Cluster_2065	24	1:14697810-14698223	414	ACAUGUUGACUCCGUAGCAAAGCA	0.418	0.1
Cluster_2066	24	1:14698489-14699693	1205	AACGCACGGGCAACCGACUAGUUC	0.505	0.7
Cluster_2069	24	1:14749062-14749246	185	AAUCCGAUAGAAACGAACAAGGCC	0.415	0.2
Cluster_2071	24	1:14753771-14754227	457	ACCCGUCCGGAUUAUUACUCGGCC	0.442	0.2
Cluster_2074	24	1:14757901-14758307	407	AUGGGAUUUCAUCUCUAGCCUACC	0.57	0.3
Cluster_2077	24	1:14785513-14785954	442	AGCAACACUCAGACAAAACCUAGU	0.638	0.1
Cluster_2079	24	1:14830595-14831608	1014	AGAUGCAAUUCGAGGGCUGCAACC	0.392	0.5
Cluster_2080	24	1:14832943-14833590	648	AAUUGGAAUUCACUCAACAAAGU	0.626	0.1
Cluster_2081	24	1:14834851-14835252	402	GGAUGAGCACCUGUUGAAUACCCC	0.884	0
Cluster_2083	24	1:14837994-14838653	660	CCUUAAUGUCCUCACCGUCAAAGA	0.915	0
Cluster_2085	24	1:14847491-14849351	1861	ACCGGGUGUUGCUGGAGACGUAGC	0.393	2.4
Cluster_2086	24	1:14849735-14850838	1104	GUAACCCUCGGCUCAACUGGUAUC	0.697	0.1
Cluster_2087	24	1:14851689-14852534	846	AUCCAGCGACAAUUAAAACGAAAC	0.469	0.2
Cluster_2088	24	1:14852907-14853200	294	AUUUGUAGUCCUUUUUUGCGAAGU	0.571	0
Cluster_2090	24	1:14854191-14855245	1055	AAAUCUUUCGGAUGGCAAUAUAGC	0.571	0.4
Cluster_2091	24	1:14856209-14856571	363	AAAAACGGAAAAGACGACGCACGU	0.681	0.1
Cluster_2092	24	1:14856936-14857199	264	AUAUAUCAGACAUGUAAACUUAAC	0.662	0
Cluster_2097	24	1:14885939-14887390	1452	AUAUUACAAAAACAAUCAACAUCU	0.774	0
Cluster_2100	24	1:14891377-14891743	367	AUCUCGGCACCAUAGCCUAUGGCA	0.173	0.5
Cluster_2107	24	1:14987144-14987396	253	UGGUGACCGAACAUGAGAAUAGAC	0.586	0.1
Cluster_2109	24	1:14988873-14989142	270	CAAGGGUUGGACAGCGCCGGACCU	0.61	0.1
Cluster_2110	24	1:14998795-14999620	826	GUUAUAGGUGUCUGGGCAAGCAGC	0.52	0.1
Cluster_2111	24	1:15000075-15000289	215	CAUGACUAGUACUUGGCUACCA	0.378	0.3
Cluster_2112	24	1:15013666-15013863	198	AUCUAGUAGACUUGCAGGUGAGGU	0.244	0.8
Cluster_2113	24	1:15018859-15019040	182	AUAUCUGACGGCUGACAUUGUGUC	0.617	0
Cluster_2114	24	1:15021941-15022120	180	GUCUUACACUGUAGACUGCAUUGU	0.47	-1
Cluster_2116	24	1:15025395-15025991	597	ACCCGAUGGGCAUAACAAAUGACU	0.309	0.5
Cluster_2121	24	1:15038183-15038396	214	CCUUGACCCUGAACCAAACAACUU	0.497	0.2
Cluster_2123	24	1:15055762-15055972	211	AAUCCCCUCCGUGAUCCCCUUGUC	0.635	0
Cluster_2124	24	1:15056722-15057713	992	AAUUCUCGUGGGGACAAAAUGACC	0.477	0.3
Cluster_2126	24	1:15066703-15067222	520	ACCAGUCACUGUCGAUUCAUUGGC	0.51	0.2
Cluster_2127	24	1:15075714-15075775	62	AAAAGAAUGCUCAAACAAAACUGG	0.333	-1
Cluster_2128	24	1:15126188-15126458	271	AUCUGAGAGUAGCCAUAAAGUGAA	0.643	0.1
Cluster_2130	24	1:15155256-15155766	511	AAUCGUAGACGCAGGGGAUUCACC	0.578	0
Cluster_2131	24	1:15157307-15157903	597	AGUAUUUGAGAAUACUGUAGUAUU	0.713	0
Cluster_2133	24	1:15162431-15162937	507	AUCGAAGACCUAGUGGCAAAGCAC	0.541	0.1
Cluster_2135	24	1:15165112-15165600	489	CUACAGUGAUGCAGAUCUUUACCU	0.64	0
Cluster_2139	24	1:15178641-15179664	1024	AAGGAUAAAUCACUAGACCAGUU	0.466	0.9
Cluster_2140	24	1:15185086-15185272	187	CGUGCGGACCGUCCGCGCCUGACC	0.69	0
Cluster_2143	24	1:15188070-15188452	383	AAUCUCUACUACUAUUAAGGCUGC	0.625	0.1
Cluster_2144	24	1:15188562-15189083	522	ACCGCUGCGGCCAUAGGAUGCCCC	0.451	0.6
Cluster_2145	24	1:15189765-15190087	323	AAUUCGACACAAACGAACAAGGCC	0.232	0.4
Cluster_2146	24	1:15192601-15192942	342	AGCAUAAGAGACUGCUAAGAGACU	0.346	0.1
Cluster_2147	24	1:15198053-15198291	239	GUGGCACUCGGCAAAGAGCCCUUU	0.42	0.3
Cluster_2148	24	1:15238051-15238605	555	AAUUUGUCGAGUGUCGAAAAGCAC	0.594	0
Cluster_2149	24	1:15299128-15299226	99	UUUUUAUUUGUCGCUCGAUAGUGC	0.419	0.1
Cluster_2150	24	1:15314075-15315218	1144	AGAUGGCCUCUCCUAGACCGCUCC	0.559	0.2
Cluster_2151	24	1:15316840-15317178	339	AAAGACAGGCAGCUGGGAAUGGGA	0.542	0
Cluster_2152	24	1:15317681-15318367	687	ACUUAUGUGAUCUUAGGGUGUGCC	0.44	0.4
Cluster_2153	24	1:15318458-15319314	857	GGACCCGGUUCACCUGUAGUCAAG	0.692	0.1
Cluster_2154	24	1:15319912-15320829	918	AUCUGUGGCGCCGAGCUAGGAAGC	0.239	2.2
Cluster_2155	24	1:15322076-15322469	394	UCUGGCACGACCCAUAUCUGGCAC	0.256	2
Cluster_2156	24	1:15322702-15322871	170	UGCCCAGUCAUCGGCCCACGGCAC	0.439	0.1
Cluster_2157	24	1:15323433-15325207	1775	ACGGUUACGGGACGUGGCUAUACC	0.421	0.9
Cluster_2159	24	1:15338037-15338474	438	AAUAAAACAAGGAAGCCCUGGUCC	0.394	0.3
Cluster_2161	24	1:15363875-15364557	683	GUUGUCGCUUUCAUGAGAAGGAGU	0.696	0.1
Cluster_2162	24	1:15367698-15368199	502	AAUUUUGACCGUAUGGGUAGAUGC	0.334	0.6
Cluster_2166	24	1:15371223-15371872	650	AUAGAUUGUAGAAGCCGAAGCGCC	0.673	0.1
Cluster_2167	24	1:15372325-15373781	1457	GAGCCCAUGGAACCCCACUGAAGC	0.404	1.1
Cluster_2168	24	1:15375131-15376200	1070	ACACGCUGUUUGGCCUUGAGCAUC	0.309	3.5
Cluster_2169	24	1:15376776-15377673	898	AUAUUUCUCCUCCUAUAUCCCACU	0.53	0.2
Cluster_2170	24	1:15379505-15379847	343	AUUGCUCGUGCUAACUUUAUGAUC	0.662	0.1
Cluster_2171	24	1:15386289-15386372	84	CUGUCCGAUCGACUACGGAGCGCC	0.44	-1
Cluster_2173	24	1:15390382-15390772	391	AAUACCCGGAAUGGAGGUUUAAAC	0.477	0.2
Cluster_2174	24	1:15391646-15391867	222	AAAGUUUAGUCGCUAAAGUAACCC	0.292	0.2
Cluster_2175	24	1:15392209-15392844	636	CGGGUCCUUGAGAUCGCUGCACCU	0.329	1.1
Cluster_2177	24	1:15395469-15395649	181	AUAUGUAGAGAAUCCAGCAGCGUC	0.448	0.1
Cluster_2178	24	1:15395779-15395959	181	AGAGGAGACUGUAAAGUACAGAUA	0.5	0
Cluster_2179	24	1:15396047-15396584	538	ACCGACACGCAGAAGCUAGGCGCC	0.353	1
Cluster_2180	24	1:15396856-15397966	1111	AUGUGUGGGAUAUGGAUUCAGCCA	0.567	0.2
Cluster_2181	24	1:15398493-15399242	750	AUCCACUCGGGAUCACUGAUCACC	0.39	0.7
Cluster_2182	24	1:15405603-15405922	320	AGAAGAGAAAGAGGCCAGAGACCC	0.467	0.2
Cluster_2183	24	1:15406089-15406723	635	CAAUUAUCCCAUGAUUCUCUUGUC	0.574	0.3
Cluster_2184	24	1:15406833-15407255	423	ACAAUUUAUGAACUGAAAUAGAAU	0.547	0.1
Cluster_2185	24	1:15408301-15408722	422	GAGCGAAGCUGUGCAAACUCUGCC	0.243	2.5
Cluster_2186	24	1:15411007-15411501	495	UUUUUCAGACCUUCGACACAAGGC	0.591	0
Cluster_2188	24	1:15416920-15417164	245	ACUAUUUCGGAAACCUAAGGACUC	0.765	0
Cluster_2191	24	1:15438811-15439820	1010	AAAUUGCAUCGACGAACGACGAGA	0.483	0.3
Cluster_2192	24	1:15440564-15441555	992	AACAAUUACUCGUGGUCUCACAGC	0.458	0.6
Cluster_2193	24	1:15452186-15452787	602	AUCUAUUUAGGAAAAUGUGUAAGC	0.671	0.1
Cluster_2194	24	1:15452996-15453829	834	GAUGUAAACGGACCAGAUUGACAC	0.442	0.4
Cluster_2196	24	1:15482502-15482724	223	GCAAGGACGGUAGUCCCGGACGGU	0.509	0
Cluster_2198	24	1:15499406-15500201	796	GCACUUCGUCAACAAUAAAUCUGU	0.228	9.3
Cluster_2199	24	1:15501791-15502168	378	AAUUGGCGGACACAACGGACGGUG	0.561	0.1
Cluster_2200	24	1:15503023-15503511	489	ACUCGACCCAACGUUUGAACAGGU	0.34	1
Cluster_2201	24	1:15504970-15505418	449	AGAUAUUUAGGAUUAGGCUUCACC	0.47	0.1
Cluster_2202	24	1:15505636-15506271	636	CCGCGAGCCCGGCACGAAACCUGC	0.335	0.9
Cluster_2203	24	1:15508310-15509024	715	ACUUAGUGAGUGAGUGUGACCUCC	0.54	0.2
Cluster_2204	24	1:15513736-15514625	890	AUUUACCAGUAUACUGAUCAGUAC	0.665	0.2
Cluster_2205	24	1:15515584-15516037	454	AAUCUGCUGACGGGAGGAAAGGGU	0.365	0.5
Cluster_2206	24	1:15532858-15533242	385	AAUCUGUGGCAAUAUAUACCGACU	0.442	0.2
Cluster_2207	24	1:15533552-15534048	497	ACUGCCACGUCAUAGCUCGGCGCC	0.421	0.2
Cluster_2209	24	1:15558004-15558603	600	AAAUGCAAUUUUGGACCCGAUACU	0.414	0.4
Cluster_2210	24	1:15558958-15559485	528	AGUUCGGCUAGGCCGGGGACCUGC	0.327	1.9
Cluster_2212	24	1:15574551-15575385	835	ACCGUGGGUAGAGUAGGCGGCAUC	0.452	0.2
Cluster_2214	24	1:15644714-15644833	120	AUGACUGAGCUUUUUACUCGAAGU	0.341	0.1
Cluster_2216	24	1:15646299-15646769	471	AUUUGAACCACUAGUCUCGACGCC	0.437	0.5
Cluster_2217	24	1:15667299-15668672	1374	AAACGGUAUGACCCGAAUGUGCCU	0.601	0.3
Cluster_2218	24	1:15670488-15670907	420	AGGGAUUCAGGUGUUUUCUCAACC	0.505	0.3
Cluster_2219	24	1:15673233-15673568	336	AAUAAAAGGACCAAGUUUUGGAUU	0.623	0
Cluster_2222	24	1:15684276-15684880	605	AUCAUAAAUCUGACGUGGUAUCCC	0.447	0.5
Cluster_2223	24	1:15686820-15687422	603	AAGGAACGAGAAUAGAGAUUUACC	0.412	0.3
Cluster_2224	24	1:15687581-15688056	476	ACUAAACUUGGAAUUCAGAACGCC	0.486	0.4
Cluster_2225	24	1:15688856-15690106	1251	CCGCACCCGUCGGGUCGGGUACCC	0.33	2.4
Cluster_2226	24	1:15691700-15692472	773	CCGCACCCGUGGGUGGAAUCUCGC	0.428	0.8
Cluster_2227	24	1:15693528-15694153	626	AUGUACCCCUGUGAUCUAGCGUGA	0.383	0.6
Cluster_2228	24	1:15694270-15694475	206	ACCGGACUGUCCGGUACGCCCGUC	0.59	0
Cluster_2229	24	1:15694700-15695428	729	ACCAACGAGAAUUAGUCAGAACCU	0.575	0.1
Cluster_2231	24	1:15752765-15753616	852	AGGGCCGAACCGUCUGACCAUGCC	0.245	0.7
Cluster_2232	24	1:15754887-15755777	891	GACGUACUCGGCACCGAACGCUAC	0.105	14.7
Cluster_2233	24	1:15756213-15756541	329	AGGACAGAGAAUAUUCUUUUAGGG	0.431	0.2
Cluster_2234	24	1:15758450-15758622	173	AUUUAGGGGACGCUUUAGAGGACC	0.629	0.1
Cluster_2235	24	1:15758779-15759287	509	AUCGUUGACGCGAAUACUAGCAGC	0.385	0.5
Cluster_2236	24	1:15761975-15762632	658	AAUAGAUUGAUACAAUAUUUGAUG	0.59	0.1
Cluster_2237	24	1:15762739-15763111	373	CUAUAGCACUGAAAGGGCACAGCU	0.254	0.7
Cluster_2238	24	1:15765918-15766393	476	AGGUCGUAGUUAAAAAAUCACCUC	0.672	0.1
Cluster_2239	24	1:15768438-15768844	407	ACUCUAUGUUGGGAGUGUUGAUCU	0.625	0.1
Cluster_2240	24	1:15769050-15769294	245	AGAGUAUUGUACAUCGAACGGACC	0.706	0.1
Cluster_2242	24	1:15782868-15784249	1382	UAUUACGCUUCGCACAAAUGUCAU	0.573	0.2
Cluster_2244	24	1:15786264-15786754	491	AUUGAUAUGGUUACCGAUUGUAUU	0.569	0.2
Cluster_2245	24	1:15787635-15787910	276	AUCGGAAUUUUAGAUCGGAAUCGG	0.583	0.2
Cluster_2247	24	1:15789305-15789978	674	AUUCCGGUACAACCGAACGGGCCC	0.291	2.6
Cluster_2249	24	1:15831175-15831579	405	UGUGACAUUUAUCUCUAUACACCC	0.504	0
Cluster_2250	24	1:15831948-15832700	753	AGCAAUCUGGGUAGGAACAAUUCC	0.481	0.2
Cluster_2251	24	1:15841228-15841842	615	ACAGGGGUGUACGGCUCACAAGGC	0.582	0
Cluster_2252	24	1:15842477-15843444	968	AUCCGAUUUGGUGGAAGUAGACCC	0.588	0.2
Cluster_2256	24	1:15897979-15898880	902	AUUGUCUGGUGAGAGUGUGAAAGC	0.658	0.1
Cluster_2258	24	1:15927529-15927972	444	ACGUCGCGCAGCAGGGGCACCAGC	0.542	0
Cluster_2260	24	1:15961114-15962039	926	ACACUUUAGGGAAACUGUUGGAGA	0.414	0.5
Cluster_2262	24	1:15965213-15967361	2149	GACUGUGUCGAGAUCCACCCUCAG	0.759	0.3
Cluster_2263	24	1:15967439-15968183	745	AUAUGUACUUGAUAGAGUUGAGCC	0.674	0.1
Cluster_2264	24	1:15969588-15969832	245	CCAAAACAUGGUCCCAACCGAGAA	0.636	0
Cluster_2265	24	1:15974602-15975402	801	AUCAGAGCUGGUCACCGAGGAGCC	0.553	0
Cluster_2267	24	1:16001969-16002637	669	CUUCUUAAAGUGAAUUGGGAUACC	0.716	0
Cluster_2269	24	1:16005986-16006295	310	CUCCUCGGCGGUGGCGAAGGAGCC	0.607	0.1
Cluster_2270	24	1:16010518-16011213	696	CUCAAUUCGGGAGGAAGAACCGGU	0.409	0.5
Cluster_2272	24	1:16019577-16020052	476	AAAAGCACGGCCCAGCCACGGCAC	0.421	1.7
Cluster_2273	24	1:16020339-16020547	209	CGGGUCGGCCCGAAAUUCAAACAA	0.524	0.1
Cluster_2275	24	1:16021297-16021632	336	GCGCUAGUCCAGUAGACACUCGAC	0.407	0
Cluster_2276	24	1:16021931-16023308	1378	ACCACACAAAUUAUUACUUGCAUC	0.34	0.9
Cluster_2277	24	1:16024073-16024370	298	AUUCUGUGUCUCCAGCAACGUCCC	0.455	0.1
Cluster_2279	24	1:16037850-16038088	239	ACGUUGCUGGGCGCGUUGGGGACG	0.305	0.3
Cluster_2280	24	1:16043561-16044339	779	AUUUAGCCCAUGUAACCAAACACC	0.483	0.6
Cluster_2284	24	1:16048303-16048897	595	ACAUUUGCCUGUAUAGUAGCUAGC	0.465	0.1
Cluster_2285	24	1:16135558-16135587	30	CUUCAUGCUGUAGAAGAGAGUACC	0.146	-1
Cluster_2289	24	1:16166280-16167380	1101	AAUAAGACGCAACAUCACCAAGCC	0.667	0.2
Cluster_2293	24	1:16225593-16226357	765	AACGUAUCGGAUCAUCUACAGCCU	0.482	0.4
Cluster_2294	24	1:16232739-16233137	399	AUAUUUCGUGAACCAAACGACACC	0.414	0.2
Cluster_2298	24	1:16281545-16282491	947	AAUGAAGUGGUACUAUUCGAGAGU	0.342	1.1
Cluster_2299	24	1:16288584-16289324	741	AUGUAUAUAAACAUAACCCCUGCU	0.321	1.6
Cluster_2302	24	1:16295466-16295917	452	GGACACACCCCUUGUGAACUCACC	0.433	0.3
Cluster_2303	24	1:16296793-16297114	322	AAAUGGACUCAUAAUACACUAACU	0.294	0.3
Cluster_2306	24	1:16298521-16298742	222	ACCCGCCAGCGUAUAUGGGUAACC	0.506	0.1
Cluster_2307	24	1:16306392-16307362	971	AAUAUUCGGCGAAGGCGUGACACU	0.634	0.1
Cluster_2308	24	1:16355224-16356035	812	ACAGCUUUUUUCACAGCCACAGCC	0.485	0.6
Cluster_2309	24	1:16361412-16361701	290	AUAAAGACAAAAUAUUGUAGAAGC	0.383	0.3
Cluster_2311	24	1:16362697-16363326	630	AGACCAGACCUAAUAUCGUGAGAC	0.466	0.1
Cluster_2312	24	1:16363996-16364340	345	AUCUUUAGAGCUAGUUUGGAAACC	0.475	0.1
Cluster_2313	24	1:16365273-16365791	519	AAUGAUUAUAUGAGUUUUUAGUGC	0.596	0.1
Cluster_2314	24	1:16365918-16367608	1691	AUUUUGGAUCGCCCGAAAUAAGCC	0.586	0.5
Cluster_2315	24	1:16369082-16369480	399	GUCCGUCCCUAUGCAGAGAGCACC	0.508	0.1
Cluster_2318	24	1:16413431-16413697	267	AGAGCUGAUUUGGUGAUUAGGGAU	0.5	0.1
Cluster_2319	24	1:16416201-16416833	633	AUAGACGUCUGAAUCUGGUCCGGC	0.564	0.1
Cluster_2321	24	1:16434866-16435173	308	AAGAAAUAGUCAUGAUGCACCACC	0.561	0
Cluster_2322	24	1:16435340-16436159	820	AGAGGACGCAUAAAUGUAGAUACC	0.589	0.1
Cluster_2323	24	1:16438059-16438358	300	AUUCUGUAACUUACAUGACACUCU	0.482	0.1
Cluster_2325	24	1:16440161-16441074	914	AGGCCGUUCUUAGAUUGUCCUUCC	0.667	0.1
Cluster_2326	24	1:16441190-16441956	767	ACCUUUUUUCGAUCUCUCGGCAUU	0.693	0.1
Cluster_2328	24	1:16442410-16442911	502	CGUGAGACAGCUAGAGAAAGCAGC	0.488	0.4
Cluster_2329	24	1:16442999-16443720	722	AUUUUCUCGGCAUAGAAUGUCACC	0.702	0
Cluster_2330	24	1:16447370-16448188	819	AUGAUAAGAGCCUGGCAGAAACCC	0.529	0.1
Cluster_2332	24	1:16557242-16557435	194	AAAGAACUGUUUAGAGGACGUUGC	0.389	0.1
Cluster_2333	24	1:16558878-16559047	170	AAAUCUUAUUGUCCACCGGUUUCC	0.321	0.1
Cluster_2334	24	1:16563689-16564463	775	CACAUUUUCGUCGGUCACGAGGCC	0.442	0.3
Cluster_2337	24	1:16569402-16569558	157	AGUGUAACACUCGGCAAAGAAGGA	0.432	-1
Cluster_2339	24	1:16610314-16611321	1008	AAUGGGCCGCAUCCCACUUGGGCC	0.495	0.7
Cluster_2341	24	1:16627805-16629137	1333	AGUGACCAGCACGACGGACGAACU	0.385	2.1
Cluster_2342	24	1:16630580-16631728	1149	AUGGAAUCAUGUGUUCUGACCGCA	0.353	0.9
Cluster_2343	24	1:16636053-16636520	468	UAUUACAGACAGCCUGAGGCACAC	0.365	0.8
Cluster_2345	24	1:16704981-16706024	1044	AGUGAACUCUGCCUUGGGCGAGGU	0.374	0.5
Cluster_2346	24	1:16708447-16709015	569	CAUGUGAGAAACAACCGUGACCGU	0.663	0.1
Cluster_2347	24	1:16710805-16712420	1616	AAAUUGCACCUGGGUAGCUCUGCC	0.75	0.2
Cluster_2348	24	1:16715437-16716005	569	AUGACUCGAUCUGAAUACGUAAGU	0.396	0.8
Cluster_2350	24	1:16718814-16719721	908	AAAAUACCCGUUUGGCAUGGCUCC	0.449	0.3
Cluster_2351	24	1:16719816-16720415	600	AACUGUGGAGAGAAUUUGAGUAUC	0.46	0.3
Cluster_2352	24	1:16720569-16721059	491	AAAAGUCAGAGUCAAAGCCAUGCC	0.551	0.1
Cluster_2353	24	1:16725075-16727606	2532	GAAAGUCUCGGCGACGGUGGCACC	0.672	0.4
Cluster_2354	24	1:16730720-16731301	582	AGACUAUGCACUUGAACAAUAAGG	0.59	0.1
Cluster_2355	24	1:16731408-16731580	173	GCGCACGAGUGAGGACAAAGUACG	0.41	0.1
Cluster_2356	24	1:16731692-16732154	463	CACACAGACGUGACUAAGAGGAGA	0.63	0
Cluster_2357	24	1:16742314-16742619	306	AAAAUUGUGUGCUUUGGGCCAGCC	0.391	0.1
Cluster_2358	24	1:16743584-16744407	824	CACGGCACAAGCACAUCUAGGCAC	0.258	1.2
Cluster_2359	24	1:16747449-16747950	502	AGUGUCGUCGCUAAAAGCUUUAGC	0.467	0.2
Cluster_2360	24	1:16748051-16748269	219	UGAGGUAGUGAACCAAACAGGCCC	0.536	0
Cluster_2362	24	1:16753839-16754066	228	ACUUGUUGUCUCCACCCAUUUACU	0.553	-1
Cluster_2366	24	1:16815541-16815702	162	AACUGCUCUACGCAUGCGCGGACC	0.5	0.1
Cluster_2367	24	1:16841583-16842312	730	AAUCCAUGUGAUGUAAGAAUAACC	0.319	5.4
Cluster_2368	24	1:16845313-16845609	297	AAUCCCAAAUAAGUCAAACUUCUU	0.72	0
Cluster_2369	24	1:16848534-16849196	663	ACUGACACGUCUAGUAGUGCACCC	0.246	3.6
Cluster_2370	24	1:16849280-16850422	1143	AAGCACUGUUUUUCAUUGUUCUGC	0.556	0.2
Cluster_2371	24	1:16851093-16851397	305	AAUGGAUCGCGAUUCAAAUGCUUC	0.526	0.2
Cluster_2372	24	1:16852203-16852599	397	AACACAAGCUGACUGAAGCUCACU	0.589	0.1
Cluster_2375	24	1:16859852-16860446	595	AGGGACAAACCAGAUACUCGAGAA	0.232	2.1
Cluster_2376	24	1:16863295-16863533	239	AAUAUCGAGACAGACAAGGAGGUC	0.518	0
Cluster_2378	24	1:16868413-16868663	251	AUUCACUAGAAACUCUUAGCGCAC	0.479	0
Cluster_2379	24	1:16869463-16869908	446	AUAGACACUCCAUUGUAUAAUAGA	0.363	0.2
Cluster_2380	24	1:16870025-16870422	398	ACAGGUAGAUGCAAGGACUAGACC	0.235	3
Cluster_2381	24	1:16870550-16870953	404	AUGAUUAUUUAGUAUUAAGUGUAG	0.539	0.1
Cluster_2382	24	1:16871240-16871830	591	ACACGCCCGGGAAUAACAGACAUU	0.663	0
Cluster_2385	24	1:16947703-16948118	416	GUUUCGGAGGACAAAUGUCUGAUU	0.543	0
Cluster_2387	24	1:16959745-16960005	261	AUUAGCUAGAGACAUCUAAACACU	0.548	0.1
Cluster_2389	24	1:16963267-16963443	177	AGCGGAACGAAAAUACAAUGUAUG	0.41	-1
Cluster_2394	24	1:17001815-17002001	187	ACUAAAAAUGGAUUUACGACCGCC	0.305	0.6
Cluster_2395	24	1:17002248-17002360	113	AGUAAUCGAACCGUCGACCUCACC	0.388	0.2
Cluster_2397	22	1:17003594-17003919	326	UGAUCAGGACACACCUCACAUU	0.511	-1
Cluster_2398	22	1:17029798-17030657	860	UUGAGAAACAGUAUAAUCUAUC	0.602	-1
Cluster_2399	22	1:17030744-17031785	1042	UUGGCACACUAGGAGCAUCACC	0.549	-1
Cluster_2400	22	1:17031907-17034211	2305	UUGUCUGUCAUUUAAAAUCUGA	0.656	-1
Cluster_2403	22	1:17038491-17039544	1054	CCCAAAUUUACUGUGGUGUUGC	0.399	-1
Cluster_2407	24	1:17057133-17057234	102	UCCGGAUGUCUAUAAAACAGGACC	0.5	0.1
Cluster_2408	24	1:17059126-17059497	372	AGACGUGGGACAGGUGGCGCACCC	0.652	0
Cluster_2410	24	1:17063731-17064093	363	GAAUCCGCCCGAGACUACUGUUCC	0.602	0.2
Cluster_2411	24	1:17137411-17137999	589	AACCACAUCAAGGUCGGAUAUGGU	0.654	0.2
Cluster_2412	24	1:17138465-17138809	345	GUCCAAUCGAAUGUUUGAACCUCC	0.42	0.2
Cluster_2413	24	1:17143281-17143689	409	AUCACAGAAGGCAUUCAUGUCACC	0.58	0
Cluster_2415	24	1:17144492-17146135	1644	AGUCACCUUGUAGUCUAAUGAAGC	0.34	2
Cluster_2416	24	1:17149458-17150542	1085	CGACGAGGACCAGUACAUUCGCAC	0.505	0.4
Cluster_2417	24	1:17150630-17151930	1301	AUAAUUUGUUGUUUCUAUAUGCCU	0.545	0.6
Cluster_2418	24	1:17152795-17153042	248	AAUUUGAUAGUCCACAACAGCUUU	0.5	0.1
Cluster_2419	24	1:17153384-17154614	1231	GAAGACCUGGACAUCUGUAGGCGA	0.551	0.2
Cluster_2421	24	1:17159872-17160292	421	ACAGUUGUAGUAGUCCAAACAAUU	0.571	0.1
Cluster_2422	24	1:17162247-17162929	683	GUGGAAGAAGCUGUUGUAGGCUGU	0.612	0.2
Cluster_2423	24	1:17167223-17167422	200	CGCGUGUCCCGAGAUUAGAUCAAC	0.301	0.2
Cluster_2426	24	1:17185017-17185208	192	UGAGAAUCGCGCGGGGAGCAAGA	0.548	0
Cluster_2427	24	1:17185936-17186069	134	AGACUGUAUAGUUCGUAGAGUGGU	0.445	0
Cluster_2428	24	1:17190217-17190885	669	UGCCGAUUCGUGGAGUCUGGACCU	0.43	0.5
Cluster_2432	24	1:17309866-17310683	818	CGUCUGUAGGCGCCUUGGACAGCC	0.412	0.2
Cluster_2433	24	1:17310873-17311621	749	AAUCUGAACCCAUAAUCUAGAUGU	0.56	0.1
Cluster_2434	24	1:17312299-17313418	1120	ACGACAUAAUGCACUCGGUAAAGC	0.412	2.6
Cluster_2435	24	1:17318070-17318513	444	AAUCCGAAAGACGACAAGUGAAGC	0.485	0.1
Cluster_2436	24	1:17326824-17327590	767	AAUGGAUCUGAGAUGCUAUAACCC	0.476	0.1
Cluster_2437	24	1:17346615-17347008	394	AUUCCAACCAAAUUAAGAAGUAGU	0.543	0
Cluster_2438	24	1:17347138-17347910	773	ACAAAACUGGGACAGAACGACUCC	0.265	1.4
Cluster_2439	24	1:17348696-17349105	410	AAUAUCACCGUAGCUCUGAUACGG	0.311	0.7
Cluster_2440	24	1:17349185-17349538	354	CUCGGUAGCCAGCACACAAGAAGC	0.685	0.1
Cluster_2441	24	1:17352599-17353640	1042	AUGGAUCCGCUACUGCUCGGCGCC	0.482	0.3
Cluster_2443	24	1:17356057-17356489	433	UUGCAUGACACUCGACAAACUCGA	0.442	0.2
Cluster_2444	24	1:17356685-17357023	339	AAUCUCUCUCGUUACUUGAGUAUC	0.474	0.1
Cluster_2445	24	1:17357726-17358239	514	AGACUAUCUACCAUACACUCUAUC	0.541	0.1
Cluster_2446	24	1:17359249-17359495	247	AAAUCAUUUGGCACGUGGCAAAGA	0.505	0.1
Cluster_2448	24	1:17365710-17366689	980	ACGGAACCAUAUAAUAACACGAUA	0.526	0.2
Cluster_2449	24	1:17366980-17367273	294	AUAGACUAUGGCGCCGAGGUACGU	0.382	0.9
Cluster_2451	24	1:17377936-17377997	62	AUCGUGCGUCGUCUGUCAGCCGUC	0.473	-1
Cluster_2454	24	1:17411339-17411769	431	AGAACACGCGCACAUGUGGACGCC	0.589	0.1
Cluster_2455	24	1:17412157-17412454	298	AAACAAGACUGGUCGAUAGCGCAA	0.581	0.1
Cluster_2456	24	1:17412966-17413400	435	ACCCAAAACACCGACAUAUGUAGU	0.636	0.1
Cluster_2458	24	1:17429517-17429685	169	CGGAUGCCCAGAUUGCGGGAGCAC	0.42	0.1
Cluster_2459	24	1:17430551-17430936	386	AUCCGUUGCACGUCUAUAGAUGCC	0.486	0.3
Cluster_2460	24	1:17431872-17432119	248	AUUAGUUGGUCUAUUAGCUGGCCC	0.385	0.3
Cluster_2462	24	1:17433867-17434309	443	AUUUUCGGCGGCCAGGGUCUAGCC	0.352	0.2
Cluster_2463	24	1:17470501-17470809	309	ACUAGGCUGUCGGUUGCACCACCC	0.529	0.1
Cluster_2464	24	1:17472002-17472609	608	AGAUAACGUCGUGUAGGUUGUUCC	0.471	0.2
Cluster_2466	24	1:17473834-17474050	217	UUAGAACACAUAUUCAUAAUCACU	0.756	0
Cluster_2469	24	1:17538654-17539420	767	ACACACAGUCGUUGCGAUGACGCC	0.667	0.1
Cluster_2470	24	1:17539648-17540069	422	AUUUACAAAAGCUGAAUUGGGCCC	0.691	0
Cluster_2471	24	1:17540153-17543164	3012	AUAGAAACGGCCUGUGAACCCAUC	0.768	0.4
Cluster_2473	24	1:17544245-17546587	2343	AAAACUGGACUCCGAGGAUAAUAU	0.727	0.3
Cluster_2474	24	1:17546664-17547719	1056	GUAUGGACAGCUCCAGCGUGAUGC	0.715	0.1
Cluster_2475	24	1:17547887-17550979	3093	AAUGAUCAGUUCGUCAUCCUCACC	0.652	0.5
Cluster_2479	24	1:17608744-17609623	880	AUGGACUAACUAGUUUGCCAAGAC	0.239	2
Cluster_2480	24	1:17614754-17615081	328	AUAUUUAUUCUGCAACAACACACC	0.516	0.1
Cluster_2482	24	1:17622094-17622397	304	AAUUAUGUGCCGUCACAGGGUAUG	0.616	0
Cluster_2484	24	1:17642411-17643776	1366	AACAAGUCGUCGAUAGCCGAGACC	0.323	1.4
Cluster_2485	24	1:17644228-17645000	773	ACAACUAUAGAUUAUCAAUGCAGC	0.796	0
Cluster_2488	24	1:17695449-17696029	581	GUCUCUUCAUAACUGUCGGUACCC	0.627	0.1
Cluster_2490	24	1:17703941-17704940	1000	AUCUACCGGCGUGACGAGGACACC	0.546	0.3
Cluster_2492	24	1:17706773-17706995	223	AUAAUCCGGCUACAUUUAAUACCC	0.279	0.3
Cluster_2493	24	1:17707653-17707907	255	ACUAUAUGAUACAACUCUGAGCCU	0.531	0.1
Cluster_2495	24	1:17709007-17709185	179	AUAAUUUAGUUCAAAAUUUGUUGG	0.59	0
Cluster_2496	24	1:17709532-17710561	1030	AGACGACAGUAGACUUGAUCGACC	0.454	0.2
Cluster_2498	24	1:17714658-17716083	1426	AGGAACUGCAUGAGAAGACGACAC	0.494	1.1
Cluster_2502	24	1:17720128-17722282	2155	GGACCAACUCUUAAACUUGAUCGU	0.446	0.9
Cluster_2505	24	1:17737252-17737912	661	ACUGUACGACAUGUAGGUGACGCC	0.377	1.9
Cluster_2506	24	1:17738254-17738883	630	ACCUGUUUGGCACGAAGCACGAUG	0.219	1.4
Cluster_2508	24	1:17774491-17775097	607	CUUUGCCGAGUGUAAAAUGACCUU	0.687	0.1
Cluster_2509	24	1:17777874-17778209	336	GUGGGUGUGGAGUGUAGACUCAGC	0.366	0.7
Cluster_2513	24	1:17804108-17805116	1009	UAAGCAUGAGACCUUUAGUACC	0.467	0.5
Cluster_2515	24	1:17824274-17824938	665	GAUCUCCAAUCGGACGGCCUAGAC	0.654	0
Cluster_2516	24	1:17832201-17832477	277	AAAGAUGGGUCCAGGAAAUGAGGC	0.538	0.1
Cluster_2517	24	1:17836923-17837972	1050	AAGACUGUCUAUAGUAGAGUGUGU	0.351	3.1
Cluster_2518	24	1:17838946-17839566	621	AAUGAGAGAGCCAAUUUAGAGAGU	0.588	0.1
Cluster_2519	24	1:17870206-17870510	305	CAAUCGGGCGGGUAGAACGCGGGU	0.5	0.2
Cluster_2520	24	1:17931782-17931924	143	AUGGGUAACCCGACGGAUAGAUUU	0.303	0.3
Cluster_2521	24	1:17932834-17933260	427	AUUGAACCGAGACCUUUCUGUGAU	0.528	0.1
Cluster_2524	24	1:17942058-17942395	338	ACCAUUAUGGCUAGUUUGGGAACC	0.632	0.1
Cluster_2525	24	1:17943217-17945170	1954	AGUGGAUAGCGUAUGAAUCGAGUC	0.531	1
Cluster_2526	24	1:17956473-17956902	430	AACCGAGGAGGAGUAGGACCCAAC	0.725	0
Cluster_2527	24	1:17957622-17957858	237	UUAAGACUUAUAUACUAUGUGGUU	0.737	0
Cluster_2528	24	1:17958067-17958707	641	AACGGCAGAACAAAGAGAGGCAGA	0.589	0.3
Cluster_2529	24	1:17961938-17962670	733	GUACUAGAGCUUGAAAAGGGCAGC	0.555	0.4
Cluster_2530	24	1:17965560-17965925	366	AUUGUAGUCACUCCGUCUGUUGCU	0.573	0
Cluster_2531	24	1:17977568-17977753	186	AGGACCCACGGGUGAGUUUUUGUA	0.326	0.2
Cluster_2532	24	1:17985734-17985828	95	GACUCGGCUCGGCUCGUUUGAGGC	0.25	0.1
Cluster_2533	24	1:17986738-17987727	990	ACUGUGUGCCUAGCGGACCGGACC	0.195	5.2
Cluster_2534	24	1:17989072-17989419	348	AGACUUUAGAAACGAGUUGGCAUU	0.316	0.9
Cluster_2535	24	1:17991057-17991485	429	AGAAUAGAGAACACUUUAGAGACC	0.387	0.2
Cluster_2536	24	1:17995497-17995725	229	GUUGAGUCGUGUUGGUACCGGGUC	0.301	0.2
Cluster_2537	24	1:17995836-17996065	230	AGGAGUGACCGACCAAGAGAGUGU	0.509	0
Cluster_2538	24	1:17997988-17998426	439	AUUGGGUCACGCCGAGUACAUGCC	0.55	0.1
Cluster_2540	24	1:18003974-18004406	433	GAUUGGUUACUUGUAUGUGAGGAU	0.336	0.5
Cluster_2541	24	1:18004898-18005265	368	AUUUAAACCCAUCCAAUCUCACCC	0.583	0.1
Cluster_2542	24	1:18006983-18007634	652	AAGUACGAACCGUAAUUUUUGAUC	0.398	0.2
Cluster_2543	24	1:18015965-18016104	140	AAGGACCCGCGCACGAUCGGUUGC	0.553	0
Cluster_2545	24	1:18017950-18018638	689	ACGCUUUUUUGGCUGACUGUACC	0.562	0.1
Cluster_2546	24	1:18018802-18018963	162	AUUUUGCACUGUCUAACGACAACU	0.424	0
Cluster_2549	24	1:18023640-18023872	233	GGCGAGCUCGAGAAGACCAGAGGA	0.256	1
Cluster_2550	24	1:18027960-18028405	446	CACCUUACCGGCGAGUUGGCGAGC	0.562	0
Cluster_2551	24	1:18028484-18030419	1936	AGUUCGUCGAGAACGCGCUGCAUC	0.458	1.2
Cluster_2552	24	1:18031079-18031432	354	AAUCUGAUAGCAUGGUGAAGAGCA	0.505	0
Cluster_2554	24	1:18047337-18047778	442	AUUAAGGAUUUAAACACACAAUCU	0.768	0.1
Cluster_2555	24	1:18053799-18054349	551	AUCACUCGAGACAACAGUGCUACC	0.826	0
Cluster_2556	24	1:18088452-18088558	107	AGUUCGUCGAAAGUGGCUCGAUA	0.288	0.2
Cluster_2557	24	1:18132764-18132954	191	AGCGCAUCUGAGCAUGUAGACGCC	0.171	-1
Cluster_2558	24	1:18135014-18136265	1252	AAAACUUUAGGCUUCGGAUUCACC	0.784	0
Cluster_2559	24	1:18145354-18146137	784	UGGUACCCCGUGCAACAUGAGAGU	0.307	0.6
Cluster_2560	24	1:18146282-18146692	411	ACUGACCCGAUCCGGCACUAAGCA	0.233	-1
Cluster_2562	24	1:18149756-18150194	439	AUAACUCGCUCGGUCGAUCGUCCU	0.325	0.6
Cluster_2563	24	1:18150502-18152090	1589	ACUCUACGAACAAUGCAAAACAGU	0.37	2.4
Cluster_2564	24	1:18153009-18153172	164	CACCUAUCCAUAAGCGUUCUCACC	0.566	0.3
Cluster_2565	24	1:18153296-18153726	431	AUCAACCGCGGAAUACAGUUAGAG	0.525	0.1
Cluster_2567	24	1:18161157-18161534	378	AGCGCAUCUGAGCAUGUAGACGCC	0.142	5.3
Cluster_2568	24	1:18162240-18163067	828	AUGUGGUGCCUCUUCUGCUUCUGU	0.687	0.1
Cluster_2569	24	1:18192664-18193569	906	UAAACUUUACUCUGCAAAUAAUGU	0.488	0.2
Cluster_2570	24	1:18196015-18196654	640	AACUGUCUCGAAACCAAACGCACC	0.29	2.3
Cluster_2573	24	1:18213925-18214148	224	GUUUUACACUUGGACAACCGUAUC	0.459	0.1
Cluster_2576	24	1:18273646-18273986	341	AUCUACAGUUACAUAUCCUCUACU	0.612	0.1
Cluster_2577	24	1:18301935-18302513	579	UUGUAAUGUUUGUAGAGU	0.833	0
Cluster_2580	24	1:18312270-18312867	598	ACGUAGAUCGUAGCCUUGACCCGU	0.6	0.2
Cluster_2581	24	1:18313207-18313815	609	AUGAAACACGUCGUGGAUGCGAGC	0.737	0.1
Cluster_2582	24	1:18314361-18314843	483	AGACGGUCCAGGACGUCGAAACGC	0.881	0
Cluster_2583	24	1:18315402-18316242	841	AUGACGUGCUGCGACCGUUUCUUC	0.798	0.1
Cluster_2587	24	1:18321908-18322353	446	GUUCGACACUGCUACCCUUGAACC	0.277	1.7
Cluster_2588	24	1:18323974-18324107	134	CCCCGGUCUCGAAACGCUGACACC	0.421	-1
Cluster_2590	24	1:18327793-18327890	98	AAGGGGCUCCGACGCAGCAACAUC	0.288	-1
Cluster_2592	24	1:18378992-18379554	563	AACUAAUAGAAAACCGGAGGGAGU	0.409	0.6
Cluster_2593	24	1:18392276-18393055	780	ACGGAUGAACCUGUAUACACUGCC	0.439	0.2
Cluster_2594	24	1:18396401-18396910	510	AGACACCAAAUAACAACUCCAAGU	0.479	0.4
Cluster_2595	24	1:18397267-18397723	457	AUUAUCUCCUGUAUUUUAGCUCCC	0.662	0
Cluster_2596	24	1:18451052-18451682	631	GUUUCCACUCUAUAACUUAUAGAA	0.267	0.8
Cluster_2597	24	1:18457800-18458610	811	ACAGGGGACAAUGCUGAACAGCCU	0.378	1
Cluster_2598	24	1:18458854-18459705	852	AAUGGACGCUCUAGAUUUAAUAUG	0.524	0.5
Cluster_2599	24	1:18459818-18460046	229	AUUGAGAGACUUAGUUUCAUGACA	0.297	-1
Cluster_2600	24	1:18463797-18465065	1269	AGUCAGUCGAGUGUUUAACAAAGC	0.728	0.1
Cluster_2601	24	1:18465316-18466323	1008	GGACCGCUUGGACUGCCUCCCGCG	0.736	0.1
Cluster_2603	24	1:18471548-18472145	598	AGGUUGCUCGGUAGUGACUUGGUC	0.677	0
Cluster_2604	24	1:18473034-18473234	201	CUGUGUGAGCACCGAUGUACGACC	0.562	0.1
Cluster_2608	24	1:18500351-18500535	185	AAAGGAGACCCCAAUACUAGGCAC	0.232	0.3
Cluster_2609	24	1:18501329-18501808	480	AGACCAGAGACAGUUGGACAACC	0.483	0.1
Cluster_2610	24	1:18501937-18502136	200	GUUUAAGCAAUUACGGACCGGGCC	0.423	0.1
Cluster_2618	24	1:18528250-18528758	509	UAUUUUGCAUUGUAGACUAUACC	0.328	0.4
Cluster_2619	24	1:18530390-18531860	1471	UUGCGUGAUCCAGACUGAGCCGGA	0.284	3.6
Cluster_2620	24	1:18532573-18532704	132	ACCCACAGGUAGAAUAUUUAGCCC	0.438	0.1
Cluster_2624	22	1:18603990-18604284	295	AUAACUUUGAAUAUCUCCCUUA	0.364	-1
Cluster_2625	24	1:18604407-18605748	1342	AACUGAAAAUCAUGCAACCGAGGC	0.794	0
Cluster_2626	24	1:18606291-18608767	2477	CGGGAACCGCGAGACUCGGGCACU	0.73	0.4
Cluster_2627	24	1:18608848-18612263	3416	ACAAGAACUCCAUGCACCACUGCG	0.77	0.3
Cluster_2628	24	1:18612458-18612616	159	AUAGUACUGUCUCAACCCUUGACC	0.611	-1
Cluster_2629	24	1:18612836-18615060	2225	AGCGCUGCACGGUGAAGAACCGGC	0.734	0.1
Cluster_2632	24	1:18620604-18621208	605	GUAGGCAGUGGUUAAUCUGUGAUG	0.79	0
Cluster_2639	24	1:18753400-18754022	623	GAGUAGGCUCUAUGGUAAAUAGGA	0.417	0.7
Cluster_2642	24	1:18758750-18759377	628	AUAUGCCAUACUUCUUUUCUCACC	0.418	0.9
Cluster_2644	24	1:18765055-18766064	1010	AUAAUGGUCCUGACCGAGAAAAUC	0.37	0.3
Cluster_2645	24	1:18771831-18772610	780	AUGCUGGAUUGUAAUCGCUCUCUC	0.603	0.1
Cluster_2650	24	1:18906142-18906840	699	GAAAGGGGACAAUAAACUCACACU	0.232	4
Cluster_2653	24	1:18910661-18911277	617	AAUAUUGUAGAAGCGAUAGAAGCU	0.593	0
Cluster_2656	24	1:18945407-18945935	529	UUUACCGGACUGUCCGGUGUGCC	0.694	0.3
Cluster_2657	24	1:18946231-18946710	480	AUGUCUGAUGGCUGACAGAUAAGC	0.384	0.4
Cluster_2659	24	1:18957218-18957488	271	AUACUAGGAUUAAAUGAAGGAGGA	0.445	0.1
Cluster_2660	24	1:18957665-18958092	428	AUUGAAGAACUAACCUUAGGCACA	0.676	0
Cluster_2661	24	1:18958249-18958455	207	GUCUUUACCGAUGCACUGUUUGCC	0.398	0.1
Cluster_2663	24	1:18964305-18965097	793	CUUUUGUCGGGCACUCGGUAAAGU	0.727	0.1
Cluster_2664	24	1:18970066-18970696	631	UACCCGUGCAUUGCGAUGACUCAC	0.566	0.1
Cluster_2666	24	1:19020816-19021949	1134	AAUCAAAUGGAUCAGAUGGUUUGC	0.43	0.4
Cluster_2667	24	1:19025785-19026873	1089	UUGAAACUUGUCGCGUAGGACAGU	0.202	2.5
Cluster_2669	24	1:19027373-19027959	587	GUUGUGUGGACUUGUCUUGUACCC	0.496	0.6
Cluster_2671	24	1:19072359-19072560	202	CCCUGGACCGACGAGUGAAAUUGU	0.448	-1
Cluster_2672	24	1:19073343-19073464	122	GGCCUUCUCAGGCAGCGGGCACCC	0.529	0
Cluster_2673	24	1:19113998-19114720	723	AAAUACAUCGACACCCGUAGACGA	0.415	0.6
Cluster_2674	24	1:19115343-19115502	160	CAACUCGGGAAGGCGACGAACAGC	0.383	0.1
Cluster_2677	24	1:19142005-19142667	663	GAUUUUGGCGGACCAUUCACGCGC	0.647	0.2
Cluster_2678	24	1:19143010-19143921	912	AGCAACUCCUGACUUGGGGCACUC	0.433	0.3
Cluster_2680	24	1:19164500-19164595	96	AUUGAAGAACUAAUCUUAGGUAGA	0.324	0.1
Cluster_2682	24	1:19168814-19169322	509	CGCAAACAGAAGCGCUGACGAGCC	0.345	0.5
Cluster_2683	24	1:19171430-19171595	166	AAACAGCAACAAAACUGGGACAGA	0.363	0
Cluster_2685	24	1:19172828-19173236	409	UGUGAUCAUUCUAACUUUACUCGU	0.221	2.2
Cluster_2686	24	1:19173508-19174381	874	AAACCCGUCGGGUUUUGCAAUCCC	0.55	0.1
Cluster_2687	24	1:19186568-19186764	197	UCAACAACUCUCGGGAGACAGCCU	0.62	0
Cluster_2690	24	1:19224424-19224593	170	AAACACUCGGUAAAAUAUUUGACA	0.326	0.1
Cluster_2691	24	1:19225370-19226569	1200	AUUCCUUGUCACCAAAUCAGUUCU	0.499	0.4
Cluster_2692	24	1:19227079-19227356	278	UUACUUAAAUCCAAUGAACAAUAU	0.59	0
Cluster_2693	24	1:19228086-19228401	316	GAUAUAUUUUGUUAAGGACAUCCU	0.487	0.1
Cluster_2694	24	1:19230562-19230760	199	ACACCAGCCGUGUCGUGCCGUGCC	0.189	-1
Cluster_2695	24	1:19230879-19231087	209	CCUGGCCUUAGGCACUAGUGC	0.73	0.2
Cluster_2696	24	1:19231715-19232011	297	AUGUCUGACGGUCUGCAUGGUAGC	0.4	-1
Cluster_2698	24	1:19303905-19304214	310	ACCGUCUGGCGGUGCUCUCUACGG	0.411	0.2
Cluster_2700	24	1:19311550-19311724	175	AUCUUUCAAGGACAGCAUAGGGGU	0.634	0.1
Cluster_2702	24	1:19317806-19318006	201	CUUAUCAUGUCAUCUAAAGCGAAC	0.654	0
Cluster_2703	24	1:19321178-19321496	319	ACCCCCUGGAUAGCACCGGACCCC	0.633	0
Cluster_2705	24	1:19326777-19327540	764	AAAGUUAGCACUCUGCCACACCUG	0.524	0.2
Cluster_2706	24	1:19329204-19329895	692	GGCAUCUGGGGCAGUGAACCAAAC	0.536	0.2
Cluster_2707	24	1:19331640-19332852	1213	ACCGAAAUUGUGACUUUACCGAGU	0.394	1.1
Cluster_2709	24	1:19386028-19386743	716	AACCACCUCGCAACGAGAACUGUC	0.53	0.2
Cluster_2710	24	1:19387308-19387487	180	CCGAUCGGUCUCCCUGGCUGGGGC	0.239	0.3
Cluster_2712	24	1:19398192-19399958	1767	AUAAAUCUUGCGCCCACCGCGCCC	0.554	0.3
Cluster_2713	24	1:19401181-19401458	278	ACGAACCGACACUAGUAUCUGAGG	0.493	0.1
Cluster_2715	24	1:19403206-19403817	612	ACACCCGCAACUUAUCUUAGAGUC	0.445	0.4
Cluster_2717	24	1:19405277-19405747	471	AAACUUGAGACCGCAAUUCUUCCU	0.252	0.9
Cluster_2718	24	1:19406538-19407310	773	AAUGGUUGGUUGCAACCCUCGUCC	0.598	0.1
Cluster_2719	24	1:19412214-19412452	239	AAUAUUCAAUGUGACACGAGAACC	0.385	-1
Cluster_2720	24	1:19413166-19413430	265	AUCUCUCGGUAGGGGAUUCUAGCC	0.265	1.6
Cluster_2721	24	1:19414317-19414519	203	AACCGUCGGAGAUAAGUUAAUGCC	0.667	0
Cluster_2722	24	1:19418901-19419395	495	AUAUCCGACGGCCUCGUAGGAAGC	0.822	0
Cluster_2723	24	1:19419825-19420428	604	ACUCUCAGGGCUGAUUUGGUGACC	0.52	0.9
Cluster_2724	24	1:19420726-19421400	675	AAUAUAAAAGAGGGACAUAGAGGA	0.722	0.1
Cluster_2725	24	1:19426650-19427184	535	CGCGGGCCGAGGAUGAACAGGAGG	0.565	0.2
Cluster_2726	24	1:19428769-19431998	3230	GACUAGAAGUAGGGACGUUCUGCC	0.513	0.8
Cluster_2728	24	1:19439948-19440116	169	CGCAGCAGCUCGGCUCGGACCGGC	0.719	0.1
Cluster_2729	24	1:19442430-19442752	323	GGAUAUGUUGGAGAACGCACCGGA	0.698	0
Cluster_2730	24	1:19443004-19443966	963	ACAAUGAAGGGCACUCGACACUCC	0.495	0.1
Cluster_2734	24	1:19499438-19499857	420	ACUGGAACUGCAAAUUAGCUGAGU	0.75	0
Cluster_2739	24	1:19569860-19570563	704	AGAGAAGACUGUAAAGUACGGAUA	0.463	0.4
Cluster_2740	24	1:19571131-19571749	619	AGCAGAGCCAUGCCAAACACGCCC	0.587	0.2
Cluster_2741	24	1:19583916-19584227	312	AAUCCCCUCCGGUUUUGUGGCUCC	0.374	0.2
Cluster_2742	24	1:19586801-19587289	489	AUUCACAUGGAUUGAGAGCUAACC	0.434	0.7
Cluster_2744	24	1:19597034-19597326	293	AUGGAAGGUGCACGUUUGGUUCCC	0.537	0.1
Cluster_2746	24	1:19603488-19603934	447	AACAACCAGCUUUUCCCCAUAGCC	0.361	-1
Cluster_2751	24	1:19620490-19621456	967	AACAAUGCUGCCAGCACCAGCGCC	0.614	0.1
Cluster_2753	24	1:19629896-19630653	758	AACGCACAGGAGAGAAUGGGAACC	0.424	0.2
Cluster_2754	24	1:19630964-19631696	733	AGACCCGUCUCCCUUCCCAUUAGC	0.646	0.1
Cluster_2756	24	1:19637363-19638232	870	AAACACAGCAAGAAACUCGGAACC	0.316	1.4
Cluster_2757	24	1:19640357-19640971	615	AGGAAGUACUCGGCAAAGAAAAGC	0.597	0
Cluster_2758	24	1:19641342-19641485	144	ACCGAGUGUAGGACUUUGCUGAGU	0.38	0.5
Cluster_2760	24	1:19654516-19655467	952	AGAUUCUCGCAUUUCGUUCUCGCC	0.428	0.5
Cluster_2761	24	1:19658643-19658890	248	AUGUGUUCUCUAUAUAUGUCUAGG	0.518	0
Cluster_2762	24	1:19659345-19660369	1025	AGGUGCCGACGUAGAAAUGGAGUU	0.368	1
Cluster_2764	24	1:19663871-19664801	931	AGGAAUCUAUUAGAUCUCGUCUAA	0.487	1.4
Cluster_2765	24	1:19665728-19666562	835	ACUAGUCAAGCUAUCUGACUCUCC	0.344	0.5
Cluster_2767	24	1:19670968-19671041	74	CCUUUUACAGCUCGUUGAGUAGGC	0.176	0.6
Cluster_2768	24	1:19690067-19690442	376	AGACUCUAAACAAAGUAUCCUGUU	0.597	0
Cluster_2770	24	1:19698479-19699732	1254	AAGAGUCCGACUGCACAUAGGGCC	0.312	1.3
Cluster_2771	24	1:19702559-19703058	500	ACGGAAUAGACACGGCACGGCACG	0.434	0.2
Cluster_2772	24	1:19703142-19703498	357	UUCGGGUUUGGAUCGAGCCGGGCC	0.461	0.2
Cluster_2774	24	1:19724025-19724789	765	ACCCGCGGAUACUAAAUUUCACUA	0.569	0.4
Cluster_2776	24	1:19726918-19727521	604	CUCCCCUAACCGGUGUGAAGACAC	0.657	0.1
Cluster_2777	24	1:19759241-19759943	703	UGAGUGGAAUUUCAAUAUAGAUAU	0.359	1.7
Cluster_2778	24	1:19760883-19761255	373	AAUCCAUUUAUACACUUGAACACC	0.452	0.2
Cluster_2779	24	1:19761340-19762908	1569	UCACACAACGUCAGCAACGAUCGU	0.615	0.4
Cluster_2780	24	1:19765039-19765987	949	AUAUUAAGAUUGUAAGGGAUAGCC	0.422	0.5
Cluster_2781	24	1:19766636-19767145	510	AUGUGGCCAUAGAACGAAGGCAGC	0.618	0
Cluster_2786	24	1:19794305-19794545	241	AGGCUUGGCCCAGCACGAAUUACA	0.649	0
Cluster_2788	24	1:19807111-19808900	1790	ACUUGCUCGGGAUUUAAACCCACC	0.343	1.4
Cluster_2789	24	1:19809448-19809761	314	AAAUUAGGAGCCUUGAGGGUACCC	0.592	0
Cluster_2790	24	1:19823807-19824084	278	AAACGAGUUCGGGCCAGGAAAGCC	0.218	1.8
Cluster_2791	24	1:19824164-19824525	362	CCGGCCCAGAUUCCCAGCACUAGC	0.524	0.1
Cluster_2793	24	1:19827544-19828267	724	AACAGAAUCUCCAACACACAAGUU	0.59	0.1
Cluster_2794	24	1:19828924-19829396	473	AUACUCUCGAACACACAAGUUAGU	0.306	0.5
Cluster_2795	24	1:19829637-19830044	408	AUUGGACCCGUGGAUUUCAAGGCC	0.356	0.3
Cluster_2797	24	1:19888657-19888894	238	ACCGCUUGAUUGUACGCUUGCACC	0.525	0.1
Cluster_2798	24	1:19889014-19889333	320	AUCACACUGUUAUCUCCAGUUAUC	0.544	0
Cluster_2799	24	1:19889741-19890557	817	AUUUGCAGUGUAAAGUUUAUAGCC	0.497	0.2
Cluster_2800	22	1:19890750-19891209	460	UUGGUGUAGUAAUUAGUUCAUC	0.236	-1
Cluster_2801	22	1:19892506-19892592	87	CUACUGGUGGAAUACAUGGAGC	0.338	-1
Cluster_2804	24	1:19905871-19906077	207	AGAGAAUCUUGCUGACGUGGCUGC	0.298	1.2
Cluster_2805	24	1:19909039-19910484	1446	GUGACGACAAGACUCAUCGGCAGC	0.324	1.6
Cluster_2806	24	1:19918981-19919772	792	AUUUAUAUACAGGUAUGAGGCUCC	0.6	0.1
Cluster_2807	24	1:19942314-19942449	136	GAUUGAGAGCUAACCGAACAUGCC	0.222	-1
Cluster_2808	24	1:19943210-19944409	1200	GUUUCCAAUCAAUAAUGUAGCAAU	0.581	0.2
Cluster_2809	24	1:19944949-19945876	928	AUUUCUGUGUCAGAUGGCUAGGCC	0.447	1
Cluster_2810	24	1:19946097-19946910	814	UAUCGCUUCUGCUUAAAGGCUGCC	0.712	0
Cluster_2811	24	1:19957701-19958114	414	AUUUCUUGACUCUGACUCUGGACC	0.328	0.6
Cluster_2812	24	1:19958905-19959388	484	AGUUGACACCCGGCACAUGUAGCC	0.198	1.5
Cluster_2814	22	1:19960622-19961267	646	ACUAAAGCAGACCACCAUUUUU	0.229	-1
Cluster_2815	24	1:19969870-19970337	468	AGACUAUGGAGCCGAGGUCGGCAU	0.322	0.3
Cluster_2818	24	1:19991987-19992508	522	CUGAACCACUGCAUGCAUUGACUU	0.452	0.3
Cluster_2819	24	1:19992606-19993155	550	AACCCGGCACGGCACGUAGGGUGC	0.436	0.9
Cluster_2820	24	1:19993512-19993688	177	AUACCACGGAACUAGCUAUAGAGC	0.486	0.1
Cluster_2821	24	1:19994022-19994268	247	CGUAUCUGUGGGUCCUGAGAUGCC	0.554	0
Cluster_2822	24	1:19996018-19996792	775	AGAUGCAAGGACCGGACCGAGGAU	0.414	0.2
Cluster_2823	24	1:20006085-20006370	286	UUGACGAACCAGCAAGACCUAGCU	0.291	0.5
Cluster_2824	24	1:20007239-20007992	754	AAUCACGUACAACUCCACAGCGGA	0.205	2.4
Cluster_2826	24	1:20020076-20020723	648	AAUUUUGACACACAUAUGAGAUAC	0.702	0
Cluster_2827	24	1:20022061-20022282	222	AAAACCAAGAACUAAAGAUUAGUC	0.552	0.1
Cluster_2828	24	1:20028291-20028700	410	AGAAAAUCGUAGACUAUCUCCAUC	0.581	0
Cluster_2829	24	1:20033058-20033454	397	ACUCCAAAAGACAUUUAGCAACUU	0.465	0
Cluster_2830	24	1:20033953-20034892	940	AUAAAAGAUUGGUGCACAUGAUGC	0.437	0.3
Cluster_2831	24	1:20104901-20105534	634	AGUGUUAUGGCUGUAGACUUGCCU	0.559	0.2
Cluster_2832	24	1:20110487-20113065	2579	AGCUGCAUCGUGUCGGUGAGCGCC	0.688	0.4
Cluster_2833	24	1:20113243-20114236	994	AUUUCCUGUAGUAGCCUGCGAGCC	0.725	0.1
Cluster_2834	24	1:20116046-20116799	754	CGACGGCAGCGCAUGUGUCUGCGC	0.709	0
Cluster_2839	24	1:20132684-20133074	391	ACGUACUGUACGUACAGUGAGAUU	0.263	0.4
Cluster_2840	24	1:20133513-20134101	589	AGACUACACUCUAUAUAUAGCAUC	0.309	1.2
Cluster_2844	24	1:20139638-20139870	233	AGAUAAGGCGGUAUUUCCGAGAGC	0.558	0
Cluster_2845	24	1:20141639-20142063	425	AGUCUGACGGCUUAAGGCUUAUGU	0.582	0
Cluster_2846	24	1:20171313-20171465	153	AAUUUGUCGUGCUCGCAACCGCCU	0.429	0.2
Cluster_2849	24	1:20217060-20217251	192	AGGAACAGUAGACCCAAGUGGAUU	0.427	0.1
Cluster_2850	24	1:20218485-20218828	344	UUUUAGUCCCUAAAACCAAACAGA	0.243	-1
Cluster_2851	24	1:20223984-20225234	1251	UCGCACUGGCGGAGCGAGAGCAUA	0.798	0.1
Cluster_2857	24	1:20229052-20229493	442	CCAUAAGGCAGUAGCUGAGAGAGC	0.723	0.3
Cluster_2858	24	1:20231095-20231177	83	AAUUAGAGGUACCCUCAAGACUCC	0.265	0.3
Cluster_2860	24	1:20269211-20270431	1221	ACCGUCCGCGUCUCUGUAGAGAGC	0.323	4
Cluster_2861	24	1:20288448-20289242	795	AUGAAGCACCGUGGAAUAUGUGUA	0.658	0.1
Cluster_2862	24	1:20289956-20290451	496	UCGUUUGUGUCGGAUUGCACCCGA	0.196	1.5
Cluster_2863	24	1:20291414-20291783	370	AGCAAAAAACACAAGUAAGGGUAU	0.205	2.5
Cluster_2864	24	1:20293027-20293081	55	ACGACCCCCUCGCUGCACCCGAAU	0.538	-1
Cluster_2866	24	1:20296507-20296773	267	AGAAUGCCUUGGAGCUGCUGCAGC	0.344	0.6
Cluster_2868	24	1:20301311-20301561	251	AAUUUACAAAUAACAUCUUCUACC	0.582	0.2
Cluster_2870	24	1:20306615-20308009	1395	UUCUCUAUUAGGGGAUGGGGAUGG	0.594	0.8
Cluster_2871	24	1:20308091-20308432	342	AAACGAUUGUGGUGUAAUCUUGCC	0.34	0
Cluster_2873	24	1:20311015-20311306	292	AAAAGAUCCCUGAAAUGCGCUGCA	0.43	0
Cluster_2875	24	1:20350585-20351277	693	GAGUUCACCGAGGACCAGCUUGGC	0.401	0.4
Cluster_2876	24	1:20353366-20353571	206	AACCCUUAGGAAAAUUAGAAUCCC	0.689	0
Cluster_2877	24	1:20353811-20353958	148	AGCCGUCGGGCAGAACCGUGCACC	0.575	0.1
Cluster_2879	24	1:20360305-20360554	250	AAUGGAACUGAAAACGAAUGGAGA	0.567	0
Cluster_2881	24	1:20370334-20370585	252	GUAGGAAUGCACGAGCAACUAACU	0.423	0
Cluster_2882	24	1:20371020-20371424	405	ACAAAAAAGUGAUGAGUGAGAAGA	0.547	0
Cluster_2886	24	1:20416067-20416429	363	GAACAAAGGGCCUCUGAAUGGCUU	0.763	0
Cluster_2889	24	1:20423929-20424836	908	AAGGGUGGCACACAGAACGUAACC	0.737	0
Cluster_2890	24	1:20426512-20426718	207	AUACUACACCAUAGUGGGCUGCCC	0.517	0.1
Cluster_2891	24	1:20427072-20427585	514	AGUUGUCGAUGGAAGACCAGACGG	0.452	0.2
Cluster_2892	24	1:20429822-20430154	333	AGCCAGGCCCUGCAGAAAUGUACU	0.28	0.1
Cluster_2894	22	1:20504402-20504940	539	UGCUGACACGGCUGACACGCCU	0.309	-1
Cluster_2895	22	1:20505185-20505517	333	UCGAGUGGCACCAACCUUUUGG	0.386	-1
Cluster_2897	22	1:20506333-20506615	283	AUCCCAUGGACCAAGCGGGCAC	0.61	-1
Cluster_2899	22	1:20507040-20507331	292	CUGGGUUUUUAUUCAAAGUGA	0.6	-1
Cluster_2901	24	1:20532517-20533182	666	UUUAUGCUGUAGUAAGGGGUACCC	0.558	0.2
Cluster_2902	24	1:20539497-20540611	1115	AUGGAUUCCGAAACAUUUUCUCGU	0.626	0.1
Cluster_2903	24	1:20547292-20547800	509	AAUCCCCUCUGAUUUUAUGGCUCC	0.504	0.2
Cluster_2904	24	1:20603270-20604407	1138	AUCGCUUGAUUGCAUGGUUGCACC	0.43	0.7
Cluster_2906	24	1:20615890-20617089	1200	ACUGCGAGCCGAGCCGAACUGACU	0.381	0.7
Cluster_2908	24	1:20722793-20723134	342	CCGAUAUCUGCCGGGCCUUUUAAC	0.403	0.3
Cluster_2909	24	1:20738046-20738448	403	AAACUAAGGAUAGUGUCGGGUACC	0.567	0
Cluster_2910	24	1:20738838-20739177	340	GACUGUAUUAUUCGGAGAGUAGA	0.545	0.2
Cluster_2911	24	1:20739714-20740206	493	AAUGUAACGGACGUGUGCGGGACA	0.288	0.8
Cluster_2912	24	1:20745057-20745458	402	GCUCCUGUGCCUAGGUCGCGGACC	0.543	0.5
Cluster_2914	24	1:20790351-20790613	263	CCCGCGAGAUUAACUCGAGAACC	0.394	0.1
Cluster_2917	24	1:20792496-20793283	788	ACGGCAUGCAUUGACUAGACGCGA	0.677	0.1
Cluster_2922	22	1:20820239-20820282	44	CAAUCACUCGAGGGGCCCAGAC	0.283	-1
Cluster_2924	24	1:20827091-20827214	124	GAAGCACAAAAAAAAGCACGGCCC	0.4	0.4
Cluster_2925	24	1:20833172-20833823	652	AUAAAUUGAGAACAAGACAACACC	0.313	0.6
Cluster_2926	24	1:20836630-20837271	642	ACUAGCCUCAAGACCGGUUGAACC	0.543	0.1
Cluster_2927	24	1:20839656-20840222	567	AUCGCCUCCGAGAACCUCGGCUCC	0.541	0.1
Cluster_2929	18	1:20842314-20842572	259	AUCCCGGUGGAACCUCCA	0.142	-1
Cluster_2930	24	1:20851033-20851737	705	AAGGGCUAGUGCGCACCACAACAU	0.441	0.5
Cluster_2931	24	1:20914178-20914393	216	AUAGGAACCGAACUCGAACCCGAA	0.438	0.2
Cluster_2932	24	1:20918216-20918801	586	AAAUAUAGAACGACAAACAUCACU	0.558	0.1
Cluster_2934	24	1:20929927-20930704	778	GACGAACGGACGGCUUAGAUUGGC	0.372	0.4
Cluster_2935	24	1:20977593-20977653	61	GUCCUAAUUUACAGAACUGCCAUC	0.385	-1
Cluster_2938	24	1:21010438-21010654	217	UUUUCUAACCGUGUCUGACGGGCC	0.457	0.3
Cluster_2939	24	1:21010793-21011236	444	ACUAUCAGGUGUUAGUGCCGGCAC	0.622	0.4
Cluster_2940	24	1:21011320-21011674	355	ACUUAAUCGUGUUGUGCUUGUGCC	0.529	0.1
Cluster_2941	24	1:21011781-21012489	709	AAAUCCCGCAAGAAACUCGAAACC	0.536	0.1
Cluster_2942	24	1:21013009-21013268	260	GUGAGGGGCUGUAAAAGAUGGUGU	0.865	0
Cluster_2943	24	1:21131456-21131602	147	AAAUCCCGCAAGAAACUCGGAACC	0.4	0
Cluster_2946	22	1:21172039-21173519	1481	UCUUUGUCUAGGAUGACCGUUC	0.256	-1
Cluster_2947	22	1:21173603-21174532	930	AUCCGAGGUGUAGAAAGGGUCAUC	0.182	-1
Cluster_2948	24	1:21184400-21184693	294	AAUUAGGCCGGGUCGGGCCAGCC	0.596	0.4
Cluster_2949	24	1:21184810-21185130	321	ACUAGUCAUGGUAGUACCGUUGUC	0.457	0.1
Cluster_2951	24	1:21186468-21187129	662	ACCACGUCGUGCCUUCGUUGGCCC	0.254	0.9
Cluster_2952	24	1:21190125-21190502	378	AAGUUGCUGUGAGCUGUGAGCUGU	0.536	0
Cluster_2955	24	1:21196871-21197322	452	ACAUGUGUUGAGAUGGAUUGGGGU	0.642	0.1
Cluster_2956	24	1:21201596-21202556	961	AAUAUGUGGUCUUUUGAGGGGUCU	0.563	0.2
Cluster_2957	22	1:21245405-21245786	382	AGUUACGGAUUUUACUGCCAGC	0.221	-1
Cluster_2960	22	1:21254182-21254475	294	GAAGAUUGUCGUCAGUCUCCCU	0.195	-1
Cluster_2961	24	1:21286351-21286976	626	AUUCACUAGUUGGUAGGACACUCG	0.315	0.4
Cluster_2963	24	1:21311326-21311405	80	AAUCCACCUCAACACAUGUAGAUU	0.341	-1
Cluster_2964	24	1:21312253-21312660	408	AGAUGCGGGGACAUCCGUAGGAGA	0.655	0
Cluster_2966	24	1:21375954-21376173	220	GUUUUUGUCCCACGAGAAUGGAAU	0.495	0.2
Cluster_2969	24	1:21389355-21390552	1198	AACUUCGGCCCAGAGCCAGCACCC	0.439	0.5
Cluster_2971	24	1:21407126-21407321	196	AUCUUAACUACCUGUAUCUGGUCC	0.24	-1
Cluster_2973	24	1:21503278-21504341	1064	ACGGAUCGCGACUACGAACUACGU	0.563	0.6
Cluster_2975	24	1:21509430-21514064	4635	GAUACCAUGUUGGAAUGAGAACCC	0.695	0.3
Cluster_2977	24	1:21516182-21518082	1901	GCUGAACUCCUAUGCACUACUAGC	0.766	0.2
Cluster_2978	24	1:21518201-21519396	1196	UGGAGUAGCCCCAUCAAAGACACA	0.791	0.1
Cluster_2979	24	1:21519610-21520384	775	AAGGGUCUGGAAAAGUUGGGCACC	0.68	0.1
Cluster_2980	24	1:21521226-21523250	2025	UCGUUAAGAAAACGAGCUGGCUC	0.778	0.1
Cluster_2981	24	1:21523511-21524120	610	GCUUUGGCGUGGGACAGACGAGGA	0.654	0
Cluster_2982	24	1:21525386-21526411	1026	AUUAAUUGGUUUUAGUCUCUAGUC	0.606	0
Cluster_2985	24	1:21549889-21550251	363	UUUUUCCCUGUCCUGCCGCCACCC	0.589	0
Cluster_2987	24	1:21555125-21555305	181	UGGAAUGGGCGAGCCGAGCCGAGC	0.333	0.3
Cluster_2989	24	1:21679661-21680595	935	AAUCCGUUCGAAAAAAUCUGACCC	0.589	0.1
Cluster_2990	24	1:21688269-21688673	405	AUUUAAACUCGUGACCUCUGGCUC	0.667	0
Cluster_2991	24	1:21695013-21695554	542	AACUCCUGUCGACCAGGUAGGGCC	0.611	0
Cluster_2992	24	1:21708803-21709054	252	UGUGGACCCAGAAUAGUCGCCUA	0.686	0
Cluster_2993	22	1:21716272-21716367	96	UGAGUCAGAUUCUUCAGAAGGU	0.15	-1
Cluster_2994	22	1:21716451-21716906	456	UUCAAAGAUACUGAGUUAGAUC	0.272	-1
Cluster_2995	22	1:21717261-21717539	279	UUGAUGAUACUCUCAUUGUUGC	0.258	-1
Cluster_2996	22	1:21717713-21717867	155	UUAGCAGAACAACUUGCAGACC	0.192	-1
Cluster_2997	22	1:21717994-21718464	471	AUGAUGCUCCAAUGACACCCU	0.193	-1
Cluster_3000	24	1:21760775-21761421	647	ACCGGUCGUGGUCGGUACCAACCC	0.481	0.1
Cluster_3001	24	1:21762201-21762912	712	ACUAAAAACCAUCUAGUGGAAGCC	0.537	0.3
Cluster_3003	24	1:21767477-21768060	584	ACACUCUAUAUGUAACACCUCACU	0.685	0.1
Cluster_3004	24	1:21768141-21770013	1873	ACCAGAUCGGACUCAUAACUGAGU	0.596	0.3
Cluster_3007	24	1:21802400-21803532	1133	AUGCGUGCGUGCGGGAGAAGGAGC	0.568	0.7
Cluster_3008	24	1:21803774-21804416	643	GACGUAAGGAGGGGUGGAUAGGUC	0.75	0.1
Cluster_3009	24	1:21805095-21805572	478	UUACCGAGUGCCUACCUUGGACAC	0.762	0
Cluster_3013	24	1:21841450-21842020	571	AUCGUAUCUGACCCGUGAAUUAUU	0.375	0.5
Cluster_3014	24	1:21845120-21845558	439	AAACACGGGAACAGACCGCCUGGC	0.63	0.1
Cluster_3017	24	1:21862383-21862656	274	AACAAAAGGACCAGCACUCACGCC	0.5	0
Cluster_3019	24	1:21882988-21883622	635	AUUUUUUGGUCCUGCCCUCAAUCC	0.607	0.1
Cluster_3020	24	1:21886051-21886260	210	AACCAAACACCAGCUUAUUGCAUC	0.503	0.1
Cluster_3021	24	1:21888274-21888542	269	CGCCAAACACUCAACAAGAACCAU	0.6	0
Cluster_3024	24	1:21889879-21890343	465	GCGUCUCCCGUCCGAGACUGGCCU	0.437	0.2
Cluster_3025	24	1:21899356-21900692	1337	AUAACUAUUGGAGUUGCUCUUAGC	0.654	0.1
Cluster_3026	24	1:21901371-21901493	123	UGUGUCUGUAAUGCAGUAUGACC	0.4	0.1
Cluster_3027	24	1:21902605-21903232	628	AUUAAGAGACUAAUGUAGACUGCC	0.707	0
Cluster_3029	24	1:21904442-21905301	860	AGCCGCUAGGAACAAGAAGACGCC	0.181	3.8
Cluster_3032	24	1:21976701-21977150	450	ACGGACUCCUCCAGCGACGAGGCU	0.65	0.1
Cluster_3034	24	1:21978862-21979142	281	AUUCUGACCGUCAGAAACCGAUGU	0.646	0
Cluster_3036	24	1:21991593-21991786	194	AGUGAGAAGUUGCCUGCCGGCGCC	0.508	0.1
Cluster_3037	24	1:21993504-21993738	235	AUUCGUUCACAAAUAUAUGACACC	0.226	0.9
Cluster_3039	24	1:21996105-21996310	206	AUGAUUGCUUAUGUGACCCAUGCC	0.308	-1
Cluster_3042	24	1:22008406-22008504	99	AACUGAAUUUGGUCUCGACGGACC	0.667	0
Cluster_3044	24	1:22014196-22014698	503	CAACGUAGCACGUACCUCGGCGCC	0.208	1.1
Cluster_3045	24	1:22015278-22015789	512	CAACGUAGCACGUACCUCGGCGCC	0.137	1.4
Cluster_3046	24	1:22019770-22020179	410	AUACCUGAUUCUAGGAACGGAGCC	0.196	1.2
Cluster_3047	24	1:22020265-22020756	492	GUCACACUCGGCAAAACCUUCACC	0.334	0.5
Cluster_3048	24	1:22033382-22034116	735	AAUCCAUCAAGUAAACAAACACCU	0.636	0
Cluster_3050	24	1:22040095-22040234	140	AUUAGCUCAUCCUGUAUCCUACCC	0.364	0
Cluster_3051	24	1:22050782-22050993	212	AGGGACCCCCGGGUUCAAAACGCC	0.447	0.1
Cluster_3052	24	1:22051225-22051630	406	AUCACACUGGUUUACCACUGGACC	0.351	0.3
Cluster_3053	24	1:22052179-22052468	290	ACCGACAGUAAUCAAAUGUAAACC	0.245	2.8
Cluster_3054	24	1:22060781-22061089	309	AUAGAGAAGACACGGAUUUAACGU	0.343	0.6
Cluster_3056	22	1:22066621-22066755	135	UUUGACUCUAGGGUCUGACGCC	0.5	-1
Cluster_3058	24	1:22070455-22071133	679	AUGUGUCACGGUUCGUCGAGACCC	0.572	0.1
Cluster_3059	24	1:22120606-22121694	1089	AUUAUCUCCCCAUCCCCGUCCCCU	0.448	0.6
Cluster_3060	24	1:22181457-22181848	392	AUCUAUCCGAACCUACAUCCGAGC	0.219	1.8
Cluster_3061	24	1:22182315-22183332	1018	ACUUUAGUUGUGUGGCGAUACUUC	0.635	0
Cluster_3062	24	1:22185788-22185919	132	AAUUGACAUGCCGUAGCAACGCAC	0.138	-1
Cluster_3064	24	1:22218562-22219014	453	CGCCUGAGGCCUGAGGGUAACGCC	0.658	0
Cluster_3067	24	1:22275333-22275694	362	CCCUUCGGAUGUUGAUGAUCACCC	0.844	0
Cluster_3072	24	1:22373219-22373646	428	AUGCUCGAACCUAGAUCUUGCGCC	0.397	0.6
Cluster_3074	24	1:22380318-22380929	612	AGCGGUCUGUUCGUCGAGCGCGCC	0.635	0.2
Cluster_3075	24	1:22381156-22381594	439	AUUUGUUUCCCGAGGUUCAGUUCC	0.638	0
Cluster_3077	24	1:22410967-22411571	605	UAGAGAUUCGAGCACUUCUUUC	0.739	0
Cluster_3080	24	1:22424588-22425292	705	AGAGAGCUGCCAGAAGUAAGUACC	0.484	0.1
Cluster_3082	24	1:22458175-22458711	537	AUUACACCAGGAUUUAUUUCAGCU	0.489	0.2
Cluster_3085	24	1:22490802-22491289	488	AAUUUUUGGAGAAAUAAGAAUACA	0.557	0.1
Cluster_3086	22	1:22518909-22519352	444	UUUCCGAUAACCUUGAGCUAGU	0.138	-1
Cluster_3087	24	1:22596000-22596590	591	UUUUGGUGAUUAGAUGCUCAACAU	0.63	0.1
Cluster_3088	24	1:22597770-22599100	1331	AUAAAUGAACUUAUGCACGUGAGA	0.393	1.7
Cluster_3089	24	1:22607373-22607521	149	AUAGUCUGUGCUAACGCUACAAUC	0.385	0
Cluster_3090	24	1:22607686-22608056	371	AUAUUCCCGCACUGUACAUUGAUG	0.396	0.2
Cluster_3091	24	1:22608144-22608620	477	CAGUUCUCCGACCGAGACCUUGGC	0.493	0.1
Cluster_3092	24	1:22614580-22615114	535	AACAAUUUGUGUUGGCCCUAACCU	0.348	1
Cluster_3093	24	1:22615562-22616403	842	AAACUUGGACUUUUACUGUUUGCC	0.602	0.4
Cluster_3095	24	1:22618472-22618705	234	UCCGACGUCUAGAAAUAUUUGAGC	0.251	0.1
Cluster_3097	24	1:22662450-22663613	1164	ACGGAGUACUUUAGCGACUAAACU	0.503	0.2
Cluster_3098	24	1:22664011-22664918	908	AGAGUUGACGGCUACGACGUGUCC	0.538	0.3
Cluster_3099	24	1:22666536-22667725	1190	CAUUUACGCUACAUUUUAGGAACC	0.498	0.6
Cluster_3100	24	1:22669674-22670116	443	AAUCCGGCUCGGAAUUGUUCCGAC	0.571	0.1
Cluster_3101	24	1:22733191-22733822	632	GAGGAAUGGACUCAUGAUGCACCA	0.408	0.1
Cluster_3103	24	1:22734522-22734994	473	AGUGAACUUCAUGGUUAACAGCCA	0.529	0.1
Cluster_3105	24	1:22741307-22741560	254	GUUCAUAUGAUCACCUAAAACACU	0.565	0.1
Cluster_3108	24	1:22811809-22812009	201	CGACACCAUUUAUGAUCAAAGCUC	0.574	0
Cluster_3109	24	1:22813164-22813710	547	GUUUGGGGACCUGUCUUGCUGACC	0.617	0
Cluster_3110	24	1:22814429-22815161	733	GACCCGGUCCGGCUAGUAUAGUGC	0.272	1.2
Cluster_3111	24	1:22835532-22836467	936	ACAACUCACAAGUGGACGUAGAGU	0.365	4
Cluster_3112	24	1:22836687-22837124	438	AUCCAUGUGGAUUGGGAGCUAACC	0.249	1.8
Cluster_3113	24	1:22838129-22838700	572	UUGAAUAGCAAGACGAUUCUAGCC	0.622	0.1
Cluster_3114	24	1:22839479-22839912	434	AGGGGACGAUGUCAUCUCUGUUCC	0.349	0.6
Cluster_3117	24	1:22845924-22846638	715	CUACUCGAUGGUAAGGGACGCACC	0.553	0.2
Cluster_3118	24	1:22847146-22847522	377	AAUUGUAUAUGUCGCCACCGGAAU	0.477	0.1
Cluster_3119	24	1:22847962-22848512	551	AAGAGGAAAGUGAACUAAAUUUCU	0.577	0.2
Cluster_3121	24	1:22870771-22871525	755	GUGUAAUUGUUCUCGAUAGAACGU	0.72	0.1
Cluster_3123	24	1:22872045-22873323	1279	ACCUUGUUGGAGGCGUAGAGGACC	0.436	0.7
Cluster_3124	24	1:22873876-22874147	272	AUUUUACACUAUCCAGCGACAACU	0.63	0
Cluster_3126	24	1:22877660-22877975	316	AUUUUCUACACAGCCAGAUUCUCC	0.667	0
Cluster_3128	24	1:22957560-22957835	276	CUAUCCGGCAUCCAGCGACCAGC	0.721	0
Cluster_3129	24	1:22957935-22957965	31	CGCCGUGGCAGCCCUGUAGUCAGC	0.22	-1
Cluster_3130	24	1:22959213-22959853	641	AUAGGAACCAAACUCGAACCCGAA	0.536	0.1
Cluster_3134	24	1:22972527-22972701	175	AUUUAUAUACCGUCACAACACACC	0.354	0.1
Cluster_3135	24	1:22990016-22990161	146	UUGUAAAUAACCGAACAAGCC	0.329	0.1
Cluster_3137	24	1:22994767-22995369	603	ACAUGACGUAGGGUAUUACACAUC	0.239	0.6
Cluster_3140	24	1:23027394-23027610	217	AACUAAAAAGAAACGAAGGGAGUA	0.489	0.2
Cluster_3142	24	1:23029608-23029908	301	CUUUAUCUGUUGGAUCUGAAAACC	0.574	0.2
Cluster_3143	24	1:23033614-23033837	224	ACGUAUGCAUAGAGAGAGCACACC	0.545	0
Cluster_3146	24	1:23110057-23110348	292	AUGUUUCCGUUGCAACGCACGAGC	0.251	2.5
Cluster_3147	24	1:23117025-23117236	212	CUAUUCGUUUCAGCAACACCCGGU	0.412	0.2
Cluster_3148	24	1:23117423-23117793	371	AUCUAGACUUUUUCCAGUAACAUC	0.48	0.2
Cluster_3149	24	1:23118345-23118514	170	GAUUUUCUGGAGCACCUAAUGACC	0.246	0.7
Cluster_3150	24	1:23122918-23123832	915	ACUCGUGGACCCACAGCACAGUGC	0.522	0.2
Cluster_3151	24	1:23136040-23136288	249	UAGACACGAACCAAACAGACCUU	0.373	-1
Cluster_3152	24	1:23146591-23147345	755	UAUUUGGAUCGUGAUCUAUUACC	0.719	0
Cluster_3153	24	1:23151031-23151372	342	AAGCUAUUUUCGACGGUGGACACC	0.238	0.5
Cluster_3154	24	1:23151462-23151829	368	ACAAUUCGGCACAAGACUCAAACC	0.416	0
Cluster_3159	22	1:23247453-23247732	280	CAGCCGCGCUGAAGUCUGGCCGCC	0.753	-1
Cluster_3161	24	1:23251142-23251873	732	AUUGGCUGAGAUGGUUUGGACACC	0.612	0
Cluster_3162	24	1:23253608-23253837	230	AACAAAUUUGAAUAGCCUGGUAUC	0.578	0.1
Cluster_3163	24	1:23254225-23254461	237	AUGUGACACGGGCUAAACUUUAGC	0.237	0.7
Cluster_3164	24	1:23254884-23255354	471	AAGUUAUUGUGGGCUGUGAGCUGU	0.469	0.3
Cluster_3165	24	1:23264575-23264738	164	AGUUUGGAUACUUUACUAUUGACC	0.507	0
Cluster_3166	24	1:23270206-23271179	974	AGGAGCUGUUUGGCGACGAGCAUC	0.293	2.2
Cluster_3167	24	1:23271960-23272531	572	GCCGAGCUGUGUUACCUCGACGCC	0.312	1.9
Cluster_3168	24	1:23284956-23285055	100	GACCACGAGUCGAGCGAGCUCACG	0.491	0
Cluster_3169	24	1:23285351-23285539	189	AAGGAACCGAGCCAGAGAACCAGC	0.252	-1
Cluster_3170	24	1:23309866-23310083	218	ACGUCAGAGCUCGGCGUCAUAGCC	0.51	0.1
Cluster_3171	24	1:23321121-23321438	318	AAAGACCAAACUCACAUAAAGAGA	0.282	0.4
Cluster_3172	24	1:23321750-23322017	268	AUUUUUGUUUGGUUAUCGAUA	0.692	-1
Cluster_3174	24	1:23325688-23326562	875	AAUUUCAGGGCUCGCUAAAGUACC	0.47	0.2
Cluster_3175	24	1:23326654-23326873	220	AGCAUUGGACUCUGGAAUGUUAGC	0.608	0
Cluster_3177	24	1:23359944-23360525	582	AAUAGACUAGCCAUAUGACUUGCC	0.376	0.3
Cluster_3179	24	1:23364838-23365691	854	AUUCUUAUGCAUGGGUUUUACAUC	0.339	1
Cluster_3180	24	1:23371684-23372739	1056	CAACGAGAACAGGACUGGCCGCAC	0.594	0.4
Cluster_3181	24	1:23372965-23373363	399	AUUUAUACCGGGCCGAAACGGGUU	0.456	0.3
Cluster_3184	24	1:23376222-23377559	1338	AUGACGGCCCGCGUGCUUUGGCCC	0.331	1.3
Cluster_3185	24	1:23379071-23379868	798	AUAAGCAGAGGUCAGAACCGAGA	0.545	0.2
Cluster_3187	24	1:23435585-23436942	1358	GAUGCGGACUGCCAAACGCUCAGC	0.384	0.9
Cluster_3188	24	1:23437999-23438563	565	GAAACUGUACGAAAAUUACCCACC	0.387	0.7
Cluster_3190	24	1:23439374-23439996	623	AGAUUCUACUGCAUUAGGCUGUCC	0.69	0.1
Cluster_3191	24	1:23440597-23440903	307	AAAUAAUCGAGACAUUAGGAUAAC	0.64	0.1
Cluster_3192	24	1:23443499-23443743	245	AGAGAAUGAGACAAAUGACAGAGU	0.435	0.4
Cluster_3193	24	1:23451035-23451467	433	AAUAGAUUGCAACACGUUAUCAGC	0.676	0
Cluster_3194	24	1:23486855-23488835	1981	AUUCGGUUGUUCCGGAUUGGAGCC	0.38	2.2
Cluster_3195	24	1:23491187-23492082	896	ACGGUGUCGGUAGCGUGAGCCACC	0.611	0.1
Cluster_3197	24	1:23494267-23494930	664	AUGGUCAGCUCAACAACGGCCACC	0.727	0.1
Cluster_3198	24	1:23495267-23495758	492	AUCGACGUAGUUACCGUAAAUACC	0.452	0.3
Cluster_3199	24	1:23499003-23499370	368	UCAGCUCGUAGACGACAGCGCGGC	0.565	0.3
Cluster_3201	24	1:23500337-23500979	643	UCAGCUCGUGGACGACAGCGCGGC	0.596	0.2
Cluster_3202	24	1:23504636-23505534	899	AAAGACAACAUUUACUCUAAUUGU	0.33	3.2
Cluster_3204	24	1:23535053-23535184	132	AAGAUAAUGCAUAGAGAUCAAACU	0.44	0.1
Cluster_3205	24	1:23553203-23553477	275	AGGAGUUGUCGUAGCCAGGAAGCC	0.821	0.1
Cluster_3207	24	1:23563797-23563995	199	AGUUUAGCCCGGAUCACAUCAAGC	0.578	0
Cluster_3208	24	1:23564349-23565387	1039	ACUAUCUCCAGCAAACUUCCUAUC	0.414	0.8
Cluster_3209	24	1:23568757-23569218	462	ACCGGACCGCCUCCGUAUGUGAAC	0.573	0.1
[truncated: 122,319 more rows]
