# Supplementary material for: Integrated Multi-Omics Reveals Significant Roles of Non-Additively Expressed Small RNAs in Heterosis for Maize Plant Height
Source: Int J Mol Sci. 2023 May 23;24(11):9150. doi: 10.3390/ijms24119150 (PMC10252383; doi:10.3390/ijms24119150)
Supplement: Supplementary file 1 [file ijms-24-09150-s001.zip › Table-S6.xlsx]

## Sheet: New
Table S6. Detail information of siRNAs, including genomic features, expression patterns, and methylation patterns of three sequence contexts.
siRNA_ID	Chr	Start	End	Dicer_Call	Genomic_Feature	GeneID	D/A_ratio_of_siRNA	Expression_Pattern_of_siRNA	CG_Site	Meth_D/A_ratio_for_CG	Meth_Pattern_for_CG	CHG_Site	Meth_D/A_ratio_for_CHG	Meth_Pattern_for_CHG	CHH_Site	Meth_D/A_ratio_for_CHH	Meth_Pattern_for_CHH
Cluster_10	1	82002	82969	24	Intergenic	-	-0.615758	DLPE	76	-0.315042	NoDiff	74	0.458005	NoDiff	221	0.0997095	NoDiff
Cluster_1000	1	7412735	7412922	24	Intergenic	-	0.239373	AE	0	0	NoDiff	0	0	NoDiff	0	0	NoDiff
Cluster_100000	5	5118604	5119681	24	Gene body	Zm00001d013120	75.0301	NoDiff	63	0.0580142	NoDiff	59	-0.769186	NoDiff	143	0.0123293	NoDiff
Cluster_100001	5	5122138	5123177	24	3'-2k	Zm00001d013120	0.102821	AE	86	0.0523355	NoDiff	36	-0.302223	NoDiff	78	1.61125	NoDiff
Cluster_100002	5	5126411	5128227	24	5'-2k	Zm00001d013122	0.232157	AE	106	1.77773	NoDiff	108	-0.0522707	NoDiff	314	0.501194	NoDiff
Cluster_100003	5	5129846	5131510	24	Gene body	Zm00001d013122	1.29403	NoDiff	69	1.39652	NoDiff	97	1.8007	NoDiff	380	8.41967	NoDiff
Cluster_100004	5	5131589	5135203	24	Gene body	Zm00001d013122	-0.720476	DLPE	202	0.0740545	NIM	183	1.37506	NoDiff	1041	-0.683469	NoDiff
Cluster_100007	5	5137382	5138683	24	Gene body	Zm00001d013122	0.0374058	AE	25	1.05227	NoDiff	19	1.01682	NoDiff	51	-1	NoDiff
Cluster_100008	5	5141415	5141773	24	Gene body	Zm00001d013122	0.459487	AE	10	0.506879	TCM	7	0.517473	TCM	33	-0.446426	NIM
Cluster_100009	5	5142156	5143117	24	Gene body	Zm00001d013122	0.176389	AE	19	0.0466994	NIM	20	0.036903	NoDiff	85	-1.80559	TCdM
Cluster_100010	5	5148665	5149116	24	5'-2k	Zm00001d013124	0.262744	AE	0	0	NoDiff	0	0	NoDiff	0	0	NoDiff
Cluster_100012	5	5150807	5151210	24	5'-2k	Zm00001d013125	0.226014	AE	28	0.205657	NoDiff	35	0.0291369	NoDiff	47	-2.96204	NoDiff
Cluster_100014	5	5160632	5161055	24	Intergenic	-	-0.515599	NoDiff	24	-4.74179	NoDiff	15	-6.40048	NoDiff	24	8.2659	NoDiff
Cluster_100016	5	5162472	5162767	24	Intergenic	-	0.987768	DHPE	11	1.39102	NoDiff	13	1.25057	NoDiff	78	-0.730039	NoDiff
Cluster_100017	5	5187765	5188916	24	5'-2k	Zm00001d013128	2.19649	NoDiff	69	2.68548	NoDiff	58	1.09215	NoDiff	312	0.393255	NoDiff
Cluster_100018	5	5223346	5224109	24	TE	-	0.503457	DHPE	52	2.15136	NoDiff	41	-0.293261	NIM	172	1.36426	NoDiff
Cluster_100019	5	5225157	5225649	24	Other	-	-1.25269	NoDiff	1	-0.34402	NoDiff	0	-0.325919	NoDiff	10	-0.667476	NoDiff
Cluster_10002	1	90869930	90870271	24	5'-2k	Zm00001d029860	0.0717148	AE	17	0.688216	NoDiff	11	0.94135	NoDiff	77	6.27892	NoDiff
Cluster_100020	5	5231471	5232011	24	5'-2k	Zm00001d013130	4.11736	NoDiff	33	0.249363	NIM	44	0.875476	TCM	104	0.505845	NoDiff
Cluster_100021	5	5233165	5233910	24	Intergenic	-	0.453813	AE	5	0.782543	NoDiff	6	0.535239	NoDiff	13	-0.150007	NoDiff
Cluster_100022	5	5236401	5236813	24	Intergenic	-	-1	DLPE	3	-2.12977	NoDiff	4	-1.9887	NoDiff	12	0.20429	NoDiff
Cluster_100023	5	5237500	5238199	24	3'-2k	Zm00001d013131	-0.0133175	AE	15	-0.674391	NoDiff	19	-1.89477	NoDiff	38	-0.706702	NoDiff
Cluster_100024	5	5238971	5239477	24	3'-2k	Zm00001d013131	-0.309847	AE	15	3.88744	NoDiff	27	1.94839	NoDiff	104	-0.464176	NoDiff
Cluster_100027	5	5245753	5246718	24	5'-2k	Zm00001d013131	0.521035	NoDiff	38	0.730675	TCM	73	0.00868953	NoDiff	194	-0.811578	NoDiff
Cluster_10003	1	90870942	90871204	24	5'-2k	Zm00001d029860	0.0936653	NoDiff	10	0.217128	NoDiff	28	6.29052	NoDiff	62	-0.0744343	NIM
Cluster_100032	5	5310689	5311645	24	Intergenic	-	0.578024	DHPE	21	0.763915	TCM	25	0.606409	TCM	95	-14.3647	TCdM
Cluster_100033	5	5311747	5312030	24	Other	-	2.77538	NoDiff	52	0.777044	TCM	29	7.47458	NoDiff	42	2.81685	TCM
Cluster_100034	5	5312370	5312709	24	3'-2k	Zm00001d013133	0.592462	DHPE	36	0.00866807	NoDiff	16	2.61256	NoDiff	61	0.683988	TCM
Cluster_100035	5	5313927	5314452	24	3'-2k	Zm00001d013133	-0.447509	AE	27	0.214893	NIM	21	0.320859	NIM	93	0.159826	NIM
Cluster_100037	5	5315671	5316512	24	5'-2k	Zm00001d013133	0.122438	AE	0	0.339245	NoDiff	0	0.301494	NoDiff	0	-0.137967	NoDiff
Cluster_100038	5	5323271	5323503	24	Other	-	2.1029	THPE	0	0.97449	NoDiff	0	0.771495	NoDiff	0	-0.248987	NoDiff
Cluster_10004	1	90917868	90918169	24	TE	-	-0.00373469	AE	27	0.611757	NoDiff	22	-0.868527	NoDiff	39	-0.253758	NoDiff
Cluster_100042	5	5328386	5329198	24	3'-2k	Zm00001d013135	-0.117241	AE	25	-2.06501	NoDiff	13	1.03759	NoDiff	100	-4.64561	NoDiff
Cluster_100043	5	5336426	5336568	24	5'-2k	Zm00001d013136	1.57559	NoDiff	0	1.1342	NoDiff	0	-0.0652361	NoDiff	0	-1	NoDiff
Cluster_100044	5	5336644	5336968	24	TE	-	-0.509507	DLPE	0	0.986702	NoDiff	0	1.08176	NoDiff	0	-1	NoDiff
Cluster_100045	5	5340141	5340353	24	5'-2k	Zm00001d013138	-2.14843	NoDiff	0	0	NoDiff	0	0	NoDiff	0	0	NoDiff
Cluster_100046	5	5340647	5340820	24	5'-2k	Zm00001d013138	-0.670416	DLPE	6	-0.253259	NIM	21	0.017807	NIM	36	-0.863304	TCdM
Cluster_100047	5	5342312	5342549	24	Gene body	Zm00001d013139	0.688088	DHPE	28	-0.567319	TCdM	18	-1	TCdM	54	0	NoDiff
Cluster_100049	5	5356953	5357243	24	Gene body	Zm00001d013140	-0.349688	AE	36	0.615606	NoDiff	16	0.148105	NIM	68	0.561135	NoDiff
Cluster_10005	1	90926910	90927638	24	3'-2k	Zm00001d029861	5.43978	NoDiff	52	-0.0678547	NoDiff	50	-0.995862	NoDiff	165	-0.0353219	NoDiff
Cluster_100052	5	5360168	5360277	24	Gene body	Zm00001d013140	-0.662595	NoDiff	14	0.0645495	NoDiff	13	0.25867	NoDiff	15	-1	NoDiff
Cluster_100053	5	5360398	5360700	24	Gene body	Zm00001d013140	-0.0285314	NoDiff	30	1.03127	NoDiff	18	1.1454	NoDiff	29	-1	NoDiff
Cluster_100055	5	5371874	5372545	24	5'-2k	Zm00001d013141	0.0511281	AE	87	0.521999	NoDiff	62	0.225628	NoDiff	170	-1.08464	TCdM
Cluster_100056	5	5378302	5378426	24	3'-2k	Zm00001d013141	-0.934968	DLPE	8	-0.422088	NIM	5	-0.80193	TCdM	28	-1	TCdM
Cluster_100057	5	5382445	5382847	24	3'-2k	Zm00001d013143	0.842436	NoDiff	16	0.163808	NoDiff	20	29.0773	NoDiff	102	-0.30331	NoDiff
Cluster_100060	5	5411236	5411578	24	Intergenic	-	0.272403	NoDiff	8	3.16547	NoDiff	9	0.942318	NoDiff	58	0.617123	TCM
Cluster_100061	5	5411838	5412459	24	Intergenic	-	-0.187539	AE	59	0.435498	NoDiff	34	2.38831	NoDiff	118	0.0293065	NIM
Cluster_100062	5	5413234	5413465	24	5'-2k	Zm00001d013146	0.403389	AE	0	0.824695	NoDiff	3	0.413844	NIM	26	0.826896	TCM
Cluster_100063	5	5413781	5414213	24	5'-2k	Zm00001d013146	-0.756927	DLPE	5	0.143664	NIM	11	-0.264667	NIM	73	0.768174	TCM
Cluster_100066	5	5422233	5422651	24	5'-2k	Zm00001d013147	-0.0669027	AE	30	0.727073	NoDiff	15	0.625432	NoDiff	103	-0.165782	NoDiff
Cluster_100068	5	5424705	5425420	24	3'-2k	Zm00001d013148	228.123	NoDiff	38	-0.147769	NoDiff	24	-1.55906	NoDiff	113	-0.612844	TCdM
Cluster_100069	5	5425497	5425640	24	3'-2k	Zm00001d013148	0.341336	AE	4	0.926047	NoDiff	2	9.11626	NoDiff	41	-0.419762	NIM
Cluster_100070	5	5448672	5449274	24	5'-2k	Zm00001d013150	0.228873	AE	0	1.21812	NoDiff	0	1.14985	NoDiff	0	-0.201296	NoDiff
Cluster_100072	5	5457295	5457684	24	Intergenic	-	-0.0344836	AE	1	-1.83488	NoDiff	2	-0.693073	NoDiff	13	-2.40769	TCdM
Cluster_100075	5	5460818	5461576	24	Other	-	0.715862	DHPE	0	0.738233	NoDiff	0	0.984343	NoDiff	10	0.0943177	NoDiff
Cluster_100076	5	5472645	5473383	24	5'-2k	Zm00001d013153	-0.343895	AE	0	0.933499	NoDiff	0	0.890359	NoDiff	0	0.241339	NoDiff
Cluster_100077	5	5473623	5474206	24	5'-2k	Zm00001d013153	-0.126097	AE	0	0.742892	NoDiff	0	0.854208	NoDiff	0	0.591379	NoDiff
Cluster_10008	1	90948052	90948382	24	TE	-	2.85958	THPE	2	-0.492857	NoDiff	2	-1	NoDiff	57	-0.884849	NoDiff
Cluster_100080	5	5476985	5477498	24	3'-2k	Zm00001d013153	-0.66344	DLPE	8	-1.20708	NoDiff	5	0.879681	NoDiff	59	-0.239416	NoDiff
Cluster_100081	5	5500872	5501464	24	Intergenic	-	-0.189393	AE	39	-0.231173	NoDiff	20	-0.465101	NoDiff	74	-7.1144	TCdM
Cluster_100082	5	5502174	5502654	24	3'-2k	Zm00001d013154	-0.129733	AE	0	0.387095	NoDiff	0	0.733437	NoDiff	0	0.421118	NoDiff
Cluster_100083	5	5502978	5503244	24	3'-2k	Zm00001d013154	0.00128207	AE	0	1.01258	NoDiff	2	0.799218	NoDiff	4	0.154858	NoDiff
Cluster_100085	5	5508702	5508855	24	5'-2k	Zm00001d013154	0.976674	DHPE	0	0	NoDiff	0	0	NoDiff	0	0	NoDiff
Cluster_100086	5	5512889	5513173	24	5'-2k	Zm00001d013155	0.324615	AE	0	0	NoDiff	0	0	NoDiff	0	0	NoDiff
Cluster_100089	5	5555786	5556521	24	Gene body	Zm00001d013156	0.30544	NoDiff	31	0.593214	NoDiff	33	0.361658	NoDiff	111	-0.375001	NoDiff
Cluster_100094	5	5564876	5565369	24	5'-2k	Zm00001d013159	0.403027	AE	22	0.830701	NoDiff	20	0.485398	NIM	123	0.804166	NoDiff
Cluster_100096	5	5567009	5567605	24	Intergenic	-	0.126709	AE	24	-0.614443	NoDiff	24	-0.338049	NoDiff	85	-0.0836418	NIM
Cluster_100097	5	5615044	5615671	24	Intergenic	-	-0.140239	NoDiff	66	1.06699	NoDiff	92	1.05439	NoDiff	149	0.460731	NoDiff
Cluster_100098	5	5616161	5616721	24	Other	-	1.80283	NoDiff	16	0.966785	NoDiff	9	1.4105	NoDiff	44	2.24294	NoDiff
Cluster_1001	1	7415546	7415844	24	Intergenic	-	0.924945	NoDiff	0	0	NoDiff	0	0	NoDiff	5	-1	NoDiff
Cluster_100100	5	5618538	5618918	24	3'-2k	Zm00001d013162	1.65681	DHPE	9	0.207318	NoDiff	7	0.820245	NoDiff	47	-2.71417	NoDiff
Cluster_100101	5	5624701	5626115	24	5'-2k	Zm00001d013162	0.318574	AE	148	0.73038	TCM	107	0.957106	TCM	339	0.747307	NoDiff
Cluster_100102	5	5626682	5626845	24	Intergenic	-	2.7689	THPE	0	0	NoDiff	0	0	NoDiff	0	0	NoDiff
Cluster_100105	5	5729668	5730059	24	5'-2k	Zm00001d013166	0.15965	AE	23	0.167218	NoDiff	10	0.19859	NoDiff	31	1.95514	NoDiff
Cluster_100108	5	5754509	5754618	24	Intergenic	-	1.0784	NoDiff	9	0.222811	NoDiff	8	1.18469	NoDiff	24	0.560027	NoDiff
Cluster_100109	5	5757092	5757145	24	5'-2k	Zm00001d013168	0.128455	AE	0	0	NoDiff	0	0	NoDiff	0	0	NoDiff
Cluster_100110	5	5757766	5758398	24	5'-2k	Zm00001d013168	-0.133545	AE	11	-0.214447	NoDiff	10	-5.7827	TCdM	38	-0.190535	NIM
Cluster_100111	5	5763200	5763445	24	3'-2k	Zm00001d013168	4.24533	THPE	12	3.64994	NoDiff	12	10.8776	NoDiff	63	44.3468	NoDiff
Cluster_100112	5	5763520	5764094	24	3'-2k	Zm00001d013168	0.599154	DHPE	36	1.0013	NoDiff	34	0.992325	NoDiff	152	1.6609	TCM
Cluster_100114	5	5800050	5800263	24	3'-2k	Zm00001d013169	-0.306326	AE	0	37.6538	NoDiff	0	1.70833	NoDiff	0	3.6823	NoDiff
Cluster_100115	5	5800342	5801104	24	3'-2k	Zm00001d013169	9.72039	NoDiff	51	0.624829	TCM	27	1.29904	TCM	46	2.57569	NoDiff
Cluster_100116	5	5805760	5805928	24	Gene body	Zm00001d013170	-0.0296091	AE	1	-1	NoDiff	3	-1	NoDiff	26	-1	NoDiff
Cluster_100117	5	5808186	5808511	24	5'-2k	Zm00001d013170	-0.288762	AE	5	1.43035	NoDiff	8	1.16067	NoDiff	46	1.70027	NoDiff
Cluster_100118	5	5808861	5809704	24	5'-2k	Zm00001d013170	1.44383	DHPE	25	1.05436	NoDiff	26	0.946587	NoDiff	165	1.61384	NoDiff
Cluster_100119	5	5810292	5810611	24	3'-2k	Zm00001d013172	0.156332	AE	24	0.60369	NoDiff	17	0.916178	NoDiff	78	0.878247	NoDiff
Cluster_10012	1	90982511	90982736	24	TE	-	-0.0772414	AE	1	1	NoDiff	2	0.0746638	NoDiff	18	-0.913802	TCdM
Cluster_100120	5	5810967	5811006	24	3'-2k	Zm00001d013172	0.902712	DHPE	0	0	NoDiff	4	0.888939	NoDiff	11	0.363205	NoDiff
Cluster_100122	5	5817447	5817714	24	Intergenic	-	-0.845805	DLPE	7	-0.623169	TCdM	8	-0.570738	TCdM	50	-0.653245	TCdM
Cluster_100123	5	5818571	5819831	24	TE	-	-0.573393	DLPE	20	0.710764	TCM	15	1.45016	NoDiff	53	-0.449424	NoDiff
Cluster_100127	5	5934430	5934801	24	3'-2k	Zm00001d013175	-0.705592	DLPE	41	1.02871	NoDiff	29	1.46403	NoDiff	82	0.545309	NoDiff
Cluster_100128	5	5936533	5936839	24	5'-2k	Zm00001d013175	-0.235101	AE	5	-0.931528	NoDiff	18	1.4565	NoDiff	71	-3.58658	TCdM
Cluster_100129	5	5956420	5956603	24	TE	-	0.289975	AE	0	-1	NoDiff	0	-1	NoDiff	0	0	NoDiff
Cluster_10013	1	91035172	91035665	24	TE	-	5.31625	NoDiff	19	-2.38075	NoDiff	12	-260.292	NoDiff	36	-0.7825	NoDiff
Cluster_100130	5	5957779	5958052	24	5'-2k	Zm00001d013176	-0.0909145	AE	6	-0.193689	NIM	13	-0.452327	NIM	32	0.845869	TCM
Cluster_100131	5	5958162	5958416	24	5'-2k	Zm00001d013176	10.5578	NoDiff	24	0.820065	NoDiff	13	-0.266784	NoDiff	58	-0.00720683	NoDiff
Cluster_100132	5	5963238	5963961	24	3'-2k	Zm00001d013176	-2.07067	NoDiff	0	0	NoDiff	0	0	NoDiff	0	0	NoDiff
Cluster_100133	5	5967889	5968020	24	Intergenic	-	-1.02932	DLPE	0	0	NoDiff	0	0	NoDiff	0	0	NoDiff
Cluster_100136	5	5984326	5984661	24	5'-2k	Zm00001d013178	0.487524	AE	14	-0.426537	NIM	10	-0.457134	NIM	29	0.669289	TCM
Cluster_100137	5	5985260	5985590	24	Intergenic	-	-0.00297873	AE	1	0.736555	NoDiff	0	0.977674	NoDiff	2	0.698316	NoDiff
Cluster_100138	5	5986993	5987576	24	3'-2k	Zm00001d013179	3.1722	NoDiff	0	5.08788	TCM	0	0.452896	NoDiff	0	-1.52825	NoDiff
Cluster_10014	1	91047045	91047208	24	TE	-	-0.28352	NoDiff	20	2.02463	NoDiff	11	0.65481	NoDiff	38	11.5687	NoDiff
Cluster_100140	5	5989344	5989912	24	Gene body	Zm00001d013179	-0.349575	AE	0	1.04629	NoDiff	0	0.10716	NoDiff	0	-0.709268	NoDiff
Cluster_100141	5	5990899	5992170	24	5'-2k	Zm00001d013179	-0.0790038	AE	0	1.03359	NoDiff	0	1.0804	NoDiff	0	0.278984	NoDiff
Cluster_100145	5	6053530	6053689	24	Intergenic	-	1.39407	NoDiff	0	0.832865	NoDiff	0	0.973058	NoDiff	0	-0.701568	NoDiff
Cluster_100147	5	6078367	6079654	24	5'-2k	Zm00001d013181	-0.24098	AE	55	1.14126	TCM	38	1.27614	NoDiff	223	-0.411537	NoDiff
Cluster_100148	5	6084541	6084969	24	5'-2k	Zm00001d013182	-0.130362	AE	28	-0.243495	NoDiff	13	-2.18136	NoDiff	116	-1.19546	TCdM
Cluster_100151	5	6087032	6088436	24	Intergenic	-	0.241453	AE	27	0.704959	NoDiff	23	0.868428	TCM	101	-2.9482	NoDiff
Cluster_100152	5	6095823	6096814	24	3'-2k	Zm00001d013184	-0.0544599	AE	16	0.713876	TCM	9	0.731459	TCM	96	-0.0505214	NIM
Cluster_100154	5	6097431	6097709	24	Intergenic	-	-0.182877	AE	14	1.3131	NoDiff	11	1.04861	NoDiff	14	-1.93648	NoDiff
Cluster_100156	5	6098331	6099476	24	5'-2k	Zm00001d013185	0.0201422	AE	6	0.938978	NoDiff	7	0.843037	NoDiff	41	-0.878904	NoDiff
Cluster_100157	5	6099628	6100082	24	5'-2k	Zm00001d013185	-0.342305	AE	10	0.824816	TCM	8	0.72435	NoDiff	44	0.404043	NIM
Cluster_100158	5	6109747	6110642	24	Gene body	Zm00001d013187	-0.194124	AE	0	0.996605	NoDiff	0	0.956547	NoDiff	0	0.245967	NoDiff
Cluster_10016	1	91063909	91064077	24	Intergenic	-	1.88923	DHPE	7	0.0096209	NoDiff	8	-0.0408163	NoDiff	9	2.66038	NoDiff
Cluster_100160	5	6117117	6117215	24	Intergenic	-	1.39796	NoDiff	0	0	NoDiff	0	0	NoDiff	0	0	NoDiff
Cluster_100161	5	6118697	6119016	24	Intergenic	-	-0.688354	DLPE	8	32.5713	NoDiff	9	2.16372	NoDiff	14	1.28088	NoDiff
Cluster_100163	5	6156286	6158526	24	5'-2k	Zm00001d013190	0.83258	NoDiff	165	-6.08629	NoDiff	110	0.259528	NoDiff	209	1.87245	NoDiff
Cluster_100164	5	6162409	6162626	24	5'-2k	Zm00001d013191	-0.333636	AE	0	0	NoDiff	0	0	NoDiff	0	0	NoDiff
Cluster_100165	5	6164209	6164730	24	3'-2k	Zm00001d013192	0.430004	AE	0	0	NoDiff	0	0	NoDiff	0	0	NoDiff
Cluster_100167	5	6172478	6172806	24	TE	-	1.52283	DHPE	16	0.647007	NoDiff	14	0.00489168	NoDiff	94	0.428719	NoDiff
Cluster_100168	5	6173627	6173914	24	5'-2k	Zm00001d013193	0.0605055	AE	28	1.00956	NoDiff	35	0.89933	NoDiff	90	0.391318	NoDiff
Cluster_100169	5	6174378	6174860	24	5'-2k	Zm00001d013193	0.349551	AE	36	0.88818	NoDiff	9	2.15629	NoDiff	130	0.75819	TCM
Cluster_100170	5	6177318	6179294	24	3'-2k	Zm00001d013193	0.393912	AE	53	0.859864	NoDiff	66	1.98272	NoDiff	206	0.219041	NoDiff
Cluster_100171	5	6179631	6180340	24	Intergenic	-	-0.0610624	AE	37	0.27658	NoDiff	28	0.428312	NoDiff	131	-0.24885	NIM
Cluster_100172	5	6180471	6180862	24	Intergenic	-	-0.149157	AE	7	0.832831	NoDiff	14	1.5377	NoDiff	66	0.264221	NIM
Cluster_100173	5	6181159	6181668	24	Intergenic	-	-0.626509	DLPE	24	0.166075	NoDiff	9	0.248615	NoDiff	94	-0.521427	NoDiff
Cluster_100174	5	6181859	6182597	24	5'-2k	Zm00001d013194	-0.197362	AE	0	0.880096	NoDiff	1	0.869417	NoDiff	10	0.476106	NoDiff
Cluster_100177	5	6190035	6190550	24	3'-2k	Zm00001d013196	-0.0760729	AE	0	0.850073	NoDiff	0	0.909868	NoDiff	0	0.351877	NoDiff
Cluster_100178	5	6195248	6196336	24	5'-2k	Zm00001d013196	0.608779	DHPE	6	0.678453	NoDiff	13	1.69383	TCM	74	-2.93489	NoDiff
Cluster_10018	1	91084355	91084466	24	Intergenic	-	0.323902	AE	10	-1.66818	NoDiff	15	-4.651	NoDiff	22	-1	NoDiff
Cluster_100180	5	6197439	6198163	24	Gene body	Zm00001d013197	-0.173991	AE	17	2.92793	NoDiff	11	2.42613	NoDiff	38	-1.43702	NoDiff
Cluster_100181	5	6223761	6224714	24	TE	-	0.147214	AE	0	1.09197	NoDiff	0	0.917189	NoDiff	0	1.15061	NoDiff
Cluster_100183	5	6271163	6271390	24	Intergenic	-	0.326796	AE	0	1.0162	NoDiff	0	0.969886	NoDiff	0	0.336466	NoDiff
Cluster_100184	5	6271649	6271926	24	Intergenic	-	0.274959	AE	0	1.04095	NoDiff	0	1.22474	NoDiff	0	0.221092	NoDiff
Cluster_100187	5	6333211	6334053	24	Intergenic	-	0.0478358	AE	0	1.03723	NoDiff	0	0.976848	NoDiff	0	0.666956	NoDiff
Cluster_100188	5	6334472	6334973	24	Intergenic	-	0.183687	AE	0	0.978747	NoDiff	0	1.12365	NoDiff	0	1.27372	NoDiff
Cluster_100189	5	6335092	6335604	24	Intergenic	-	0.767532	NoDiff	2	0.928502	NoDiff	4	0.864632	NoDiff	2	0.289868	NoDiff
Cluster_100191	5	6337365	6338212	24	Gene body	Zm00001d013199	-4.12144	NoDiff	24	0.852146	NoDiff	40	0.123309	NIM	143	0.808712	NoDiff
Cluster_100194	5	6344636	6345743	24	5'-2k	Zm00001d013199	1.13752	DHPE	127	0.463066	NoDiff	81	-0.0886846	NoDiff	141	0.968944	NoDiff
Cluster_100195	5	6345918	6346427	24	5'-2k	Zm00001d013199	0.106334	AE	0	1.2751	NoDiff	0	1.26879	NoDiff	0	0.0713151	NoDiff
Cluster_100196	5	6347931	6348178	24	5'-2k	Zm00001d013200	-1.94753	NoDiff	34	-0.0942181	NoDiff	14	-0.624581	NoDiff	58	0.144444	NIM
Cluster_100197	5	6348343	6348569	24	5'-2k	Zm00001d013200	-0.197909	AE	28	-2.05208	NoDiff	14	0.270769	NoDiff	67	-1.17084	TCdM
Cluster_100199	5	6351279	6351513	24	3'-2k	Zm00001d013200	3.54037	THPE	0	4.34167	NoDiff	0	9.57818	NoDiff	0	10.4837	NoDiff
Cluster_1002	1	7420410	7420912	24	TE	-	0.323609	AE	0	-0.90867	NoDiff	0	-0.983658	NoDiff	0	-1	NoDiff
Cluster_100200	5	6352722	6353343	24	Intergenic	-	-0.31914	AE	9	0.711812	TCM	5	2.41843	NoDiff	54	-0.372913	NoDiff
Cluster_100201	5	6396270	6396402	24	5'-2k	Zm00001d013201	0.48017	AE	0	0.993708	NoDiff	0	0.991014	NoDiff	0	0.689811	NoDiff
Cluster_100202	5	6397666	6397874	24	Gene body	Zm00001d013201	2.71623	NoDiff	17	0.119354	NoDiff	26	0.399071	NoDiff	60	2.77307	TCM
Cluster_100203	5	6403802	6404304	24	3'-2k	Zm00001d013202	1.46318	NoDiff	31	1.322	NoDiff	28	-0.00262422	NoDiff	69	0.704301	NoDiff
Cluster_100204	5	6408177	6408547	24	5'-2k	Zm00001d013202	0.456018	AE	0	1.28617	NoDiff	0	1.01085	NoDiff	0	0.644819	NoDiff
Cluster_100205	5	6414850	6415854	24	TE	-	0.330179	AE	0	1.12209	NoDiff	0	0.994172	NoDiff	0	0.142839	NoDiff
Cluster_100206	5	6416345	6416920	24	Intergenic	-	0.06451	AE	12	1.70619	NoDiff	4	1.96285	TCM	40	-0.69419	TCdM
Cluster_100209	5	6420322	6421318	24	3'-2k	Zm00001d013203	0.00189926	AE	61	5.03316	NoDiff	73	0.480714	NoDiff	141	25.3389	NoDiff
Cluster_10021	1	91141207	91141498	24	3'-2k	Zm00001d029868	1.8337	NoDiff	13	0.295799	NoDiff	6	0.457918	NoDiff	76	-0.575934	TCdM
Cluster_100210	5	6428066	6429311	24	Gene body	Zm00001d013204	1.84994	NoDiff	114	1.89721	NoDiff	81	-0.754316	NoDiff	321	0.0973744	NoDiff
Cluster_100212	5	6431024	6431489	24	Gene body	Zm00001d013204	-0.847223	NoDiff	30	-2.82801	NoDiff	18	0.907257	NoDiff	161	0.120791	NoDiff
Cluster_100213	5	6432986	6433492	24	5'-2k	Zm00001d013204	0.640908	NoDiff	60	1.08297	NoDiff	41	1.04792	NoDiff	103	0.283402	NoDiff
Cluster_100214	5	6442981	6443244	24	TE	-	-0.193454	NoDiff	17	0.966095	NoDiff	10	1.18009	NoDiff	28	2.64831	NoDiff
Cluster_100216	5	6548011	6548584	24	TE	-	0.115552	AE	59	0.977791	NoDiff	86	1.00095	NoDiff	141	1.6193	NoDiff
Cluster_100217	5	6549520	6550005	24	TE	-	0.87498	DHPE	8	0.0488453	NoDiff	19	-0.983344	NoDiff	143	0.498355	NoDiff
Cluster_100218	5	6550271	6550839	24	5'-2k	Zm00001d013206	-0.888263	DLPE	19	-2.86727	NoDiff	18	-0.936372	TCdM	146	-0.784987	TCdM
Cluster_100219	5	6551204	6552199	24	5'-2k	Zm00001d013206	0.0817636	AE	70	0.53874	NoDiff	46	0.149411	NoDiff	254	-0.0642065	NIM
Cluster_10022	1	91147370	91147801	24	Intergenic	-	5.77295	NoDiff	0	0.884481	NoDiff	0	0.620415	NoDiff	0	-0.161296	NoDiff
Cluster_100220	5	6552333	6552563	24	5'-2k	Zm00001d013206	0.15345	AE	18	1.45239	NoDiff	16	0.516523	NoDiff	63	0.965299	NoDiff
Cluster_100221	5	6553740	6554137	24	Gene body	Zm00001d013206	1.30358	NoDiff	10	0.0841576	NoDiff	7	0.420349	NoDiff	117	-0.879109	TCdM
Cluster_100222	5	6555455	6555864	24	Gene body	Zm00001d013206	9.92886	NoDiff	31	0.327003	NoDiff	27	-0.177314	NoDiff	132	-0.987915	TCdM
Cluster_100226	5	6569750	6572077	24	Gene body	Zm00001d013206	-0.619631	DLPE	134	1.84807	NoDiff	110	2.07034	NoDiff	458	-0.327085	NoDiff
Cluster_100228	5	6573941	6574403	24	Gene body	Zm00001d013206	4.45481	THPE	16	-0.968269	NoDiff	22	-0.421574	NoDiff	129	-0.463658	NIM
Cluster_100229	5	6576297	6576769	24	3'-2k	Zm00001d013206	0.736666	DHPE	25	-0.0796127	NIM	19	0.601852	NoDiff	122	3.98346	NoDiff
Cluster_10023	1	91149948	91151293	24	Intergenic	-	1.40877	DHPE	71	0.668982	TCM	61	0.848235	TCM	324	-0.0827185	NoDiff
Cluster_100230	5	6590112	6591000	24	Intergenic	-	-0.178549	AE	74	0.551644	NoDiff	75	0.760255	NoDiff	179	2.05431	NoDiff
Cluster_100232	5	6608349	6609027	24	TE	-	-0.122895	AE	0	1.03086	NoDiff	0	1.132	NoDiff	0	0.894366	NoDiff
Cluster_100233	5	6610847	6611674	24	Intergenic	-	-0.123647	AE	16	0.434713	NIM	19	-0.693082	NoDiff	50	-0.324695	NoDiff
Cluster_100234	5	6612345	6614802	24	3'-2k	Zm00001d013211	-0.294441	AE	157	0.440057	NoDiff	129	0.704697	NoDiff	499	-0.561319	NoDiff
Cluster_100235	5	6624174	6624672	24	3'-2k	Zm00001d013212	0.96117	DHPE	2	7.79625	NoDiff	1	5.24115	NoDiff	1	3.26224	NoDiff
Cluster_100236	5	6627649	6628160	24	5'-2k	Zm00001d013212	0.496945	NoDiff	39	0.810187	NoDiff	19	0.654635	NoDiff	39	-0.22096	NoDiff
Cluster_100237	5	6636205	6636500	24	3'-2k	Zm00001d013215	-0.895913	DLPE	5	0.519419	NoDiff	2	0.0208143	NoDiff	15	0.289551	NIM
Cluster_10024	1	91151665	91152278	24	Intergenic	-	-0.777671	DLPE	79	-1.3455	NoDiff	56	-0.661653	NoDiff	164	-1.73131	NoDiff
Cluster_100240	5	6645641	6646442	24	5'-2k	Zm00001d013217	-0.0473939	AE	46	1.43158	NoDiff	30	1.07689	NoDiff	209	0.26708	NoDiff
Cluster_100241	5	6646751	6646981	24	3'-2k	Zm00001d013216	1.19023	NoDiff	43	2.49929	NoDiff	17	2.74588	NoDiff	31	0	NoDiff
Cluster_100242	5	6670607	6670898	24	TE	-	0.584622	DHPE	11	0.208959	NoDiff	6	1.18923	NoDiff	24	0.187547	NIM
Cluster_100244	5	6701561	6701950	24	5'-2k	Zm00001d013219	-0.80989	NoDiff	3	0.00966184	NoDiff	4	0.481481	NoDiff	14	-1	NoDiff
Cluster_100245	5	6704240	6704552	24	Gene body	Zm00001d013219	-0.946335	DLPE	11	0.932093	NoDiff	13	0.0930259	NoDiff	84	-1.51932	NoDiff
Cluster_100246	5	6708325	6708609	24	3'-2k	Zm00001d013219	0.0144627	AE	0	-1	NoDiff	0	2.02368	NoDiff	1	1.36049	NoDiff
Cluster_100248	5	6713891	6714347	24	5'-2k	Zm00001d013221	-0.264238	AE	0	1.52516	NoDiff	3	0.808084	NoDiff	18	0.03356	NIM
Cluster_100249	5	6728262	6728801	24	5'-2k	Zm00001d013223	-0.167065	AE	1	0.485239	NoDiff	2	0.317513	NIM	34	0.925024	NoDiff
Cluster_10025	1	91152927	91153851	24	TE	-	3.27356	NoDiff	81	0.535089	NoDiff	50	0.122503	NoDiff	156	-0.576014	NoDiff
Cluster_100250	5	6743547	6743705	24	TE	-	-0.119203	AE	0	0.874105	NoDiff	0	0.512222	NoDiff	0	-0.650233	NoDiff
Cluster_100251	5	6749601	6750140	24	3'-2k	Zm00001d013224	0.0149319	AE	24	1.48603	NoDiff	20	1.31318	NoDiff	62	0.212188	NoDiff
Cluster_100252	5	6755512	6755918	24	5'-2k	Zm00001d013225	-0.0231324	AE	0	0.790789	NoDiff	0	0.886169	NoDiff	0	1.56803	NoDiff
Cluster_100253	5	6761536	6762014	24	5'-2k	Zm00001d013226	-0.194122	AE	0	0.918033	NoDiff	0	0.844547	NoDiff	0	0.849321	NoDiff
Cluster_100255	5	6770001	6770298	24	5'-2k	Zm00001d013228	-0.200006	AE	0	1.19712	NoDiff	0	1.35363	NoDiff	0	1.37979	NoDiff
Cluster_100256	5	6775746	6776387	24	5'-2k	Zm00001d013229	0.503225	NoDiff	37	-0.727209	TCdM	11	-1.20064	NoDiff	194	0.538094	NoDiff
Cluster_100257	5	6776493	6777162	24	5'-2k	Zm00001d013229	20.2845	THPE	30	-0.734887	NoDiff	21	-0.638978	NoDiff	209	-1.17236	NoDiff
Cluster_100259	5	6780962	6781521	24	3'-2k	Zm00001d013230	-0.372989	NoDiff	16	1.70129	NoDiff	35	0.861925	NoDiff	156	-0.640546	NoDiff
Cluster_10026	1	91155612	91156924	24	Intergenic	-	77.5861	NoDiff	79	0.222566	NoDiff	87	0.730981	TCM	393	0.270458	NoDiff
Cluster_100261	5	6795760	6796054	24	3'-2k	Zm00001d013231	0.343582	NoDiff	0	0.883334	NoDiff	0	0.800649	TCM	0	3.56571	NoDiff
Cluster_100262	5	6796625	6797744	24	Gene body	Zm00001d013231	0.304638	AE	32	0.337992	NIM	33	0.430806	NIM	140	0.215537	NoDiff
Cluster_100263	5	6800332	6800512	24	5'-2k	Zm00001d013231	0.106567	AE	2	0.431295	NoDiff	13	0.544832	TCM	36	0.303441	NIM
Cluster_100264	5	6800827	6801162	24	5'-2k	Zm00001d013231	-0.205852	AE	0	0.66976	NoDiff	0	0.502995	NoDiff	4	-0.103807	NoDiff
Cluster_100265	5	6804255	6805439	24	Gene body	Zm00001d013232	-0.121454	AE	139	0.749329	NoDiff	101	1.24454	NoDiff	306	0.622713	NoDiff
Cluster_100266	5	6806465	6807436	24	5'-2k	Zm00001d013232	6.86476	THPE	63	0.707763	NoDiff	55	0.551772	TCM	152	-0.603301	TCdM
Cluster_100268	5	6835046	6835658	24	TE	-	11.8991	NoDiff	8	-0.15019	NoDiff	2	-1.20906	NoDiff	143	0.0969884	NIM
Cluster_10027	1	91249295	91250290	24	5'-2k	Zm00001d029872	-2.56024	NoDiff	49	0.249771	NoDiff	27	1.96277	NoDiff	83	0.092745	NoDiff
Cluster_100270	5	6845046	6845422	24	TE	-	0.372763	AE	22	1.03134	NoDiff	34	1.10208	NoDiff	54	0.642915	NoDiff
Cluster_100272	5	6850055	6850838	24	3'-2k	Zm00001d013237	0.0940808	AE	49	-212.157	NoDiff	65	-2.46328	NoDiff	122	-1.18209	NoDiff
Cluster_100274	5	6858476	6858718	24	5'-2k	Zm00001d013238	-0.329923	AE	7	-2.34615	NoDiff	0	-2.15789	NoDiff	5	0.579487	NoDiff
Cluster_100275	5	6859854	6860529	24	5'-2k	Zm00001d013239	-0.398373	NoDiff	36	2.17806	TCM	50	43.1187	TCM	186	-0.686393	TCdM
Cluster_100278	5	6868653	6868985	24	Gene body	Zm00001d013240	-0.346004	AE	31	-1.03787	NoDiff	23	0.259289	NoDiff	95	-0.321022	NoDiff
Cluster_10028	1	91258104	91259145	24	3'-2k	Zm00001d029872	-21.8006	NoDiff	63	-1.36116	NoDiff	25	2.95463	NoDiff	116	1.36312	NoDiff
Cluster_100281	5	6895713	6896642	24	3'-2k	Zm00001d013241	13.6444	NoDiff	34	0.079567	NoDiff	23	3.0795	NoDiff	164	-0.246097	NoDiff
Cluster_100282	5	6940976	6941203	24	Gene body	Zm00001d013243	6.08935	NoDiff	0	0	NoDiff	0	0	NoDiff	87	2.49214	TCM
Cluster_100284	5	6950552	6950813	24	5'-2k	Zm00001d013245	0.150216	AE	16	0.219014	NIM	16	0.123925	NIM	61	-0.098994	NIM
Cluster_100285	5	6955127	6955375	24	3'-2k	Zm00001d013245	-0.79666	NoDiff	14	-0.968384	NoDiff	4	-1.48494	NoDiff	40	-0.907834	TCdM
Cluster_100287	5	7061759	7062804	24	5'-2k	Zm00001d013246	-0.0223591	AE	40	2.07835	NoDiff	103	2.01197	NoDiff	324	-1.56794	NoDiff
Cluster_100289	5	7066248	7066733	24	3'-2k	Zm00001d013246	0.388329	AE	18	0.833661	NoDiff	13	2.68602	NoDiff	143	-1.97717	NoDiff
Cluster_10029	1	91285358	91285986	24	3'-2k	Zm00001d029874	-0.531551	DLPE	24	-0.952742	NoDiff	26	-0.184783	NoDiff	173	-0.447998	NoDiff
Cluster_100292	5	7095880	7096356	24	5'-2k	Zm00001d013248	-0.781308	DLPE	18	0.275838	NoDiff	20	-0.150716	NoDiff	109	-1.8179	NoDiff
Cluster_100294	5	7096773	7098460	24	5'-2k	Zm00001d013248	0.0112631	NoDiff	167	-0.182655	NIM	97	-0.10173	NIM	423	-0.337065	NIM
Cluster_100295	5	7106500	7107252	24	5'-2k	Zm00001d013249	-0.0838702	AE	56	1.19966	NoDiff	59	1.00874	NoDiff	212	-0.217718	NoDiff
Cluster_100296	5	7110605	7110699	24	3'-2k	Zm00001d013249	-1.14108	DLPE	16	1.01341	NoDiff	6	1.0895	NoDiff	21	0.813689	NoDiff
Cluster_1003	1	7455911	7456743	24	3'-2k	Zm00001d027527	0.0136616	AE	33	0.569199	NoDiff	27	0.570719	NoDiff	128	0.131252	NIM
Cluster_100300	5	7115127	7116705	24	5'-2k	Zm00001d013250	0.0562445	AE	58	0.874033	NoDiff	102	1.22582	TCM	365	-0.935079	TCdM
Cluster_100301	5	7117694	7117921	24	Gene body	Zm00001d013250	-0.116729	AE	0	0	NoDiff	0	0	NoDiff	0	0	NoDiff
Cluster_100302	5	7118267	7118504	24	Gene body	Zm00001d013250	0.358849	AE	0	0	NoDiff	0	2.73333	NoDiff	0	0	NoDiff
Cluster_100303	5	7124011	7124455	24	Gene body	Zm00001d013250	1.57549	NoDiff	0	1.24851	NoDiff	5	6.69481	NoDiff	28	4.15124	NoDiff
Cluster_100304	5	7125349	7126097	24	3'-2k	Zm00001d013250	0.646553	NoDiff	0	1.09997	NoDiff	0	0.86448	NoDiff	0	0.616171	NoDiff
Cluster_100305	5	7126500	7127155	24	3'-2k	Zm00001d013250	0.0358932	AE	6	-2.53853	NoDiff	8	-3.04396	NoDiff	17	-0.47191	NoDiff
Cluster_100311	5	7149924	7150124	24	5'-2k	Zm00001d013253	0.808329	NoDiff	12	-1.06859	NoDiff	4	3.1234	NoDiff	40	2.13616	TCM
Cluster_100312	5	7150218	7150971	24	5'-2k	Zm00001d013253	0.147535	AE	38	-2.56972	NoDiff	48	0.895948	TCM	212	-2.46795	NoDiff
Cluster_100313	5	7151343	7151820	24	5'-2k	Zm00001d013253	1.52459	NoDiff	36	0.998111	NoDiff	27	1.46953	TCM	124	1.33128	NoDiff
Cluster_100314	5	7151899	7152432	24	3'-2k	Zm00001d013254	-0.317105	AE	18	4.31167	NoDiff	34	0.80931	NoDiff	143	0.322719	NoDiff
Cluster_100315	5	7158502	7158788	24	5'-2k	Zm00001d013254	-0.524906	DLPE	23	-0.635811	NoDiff	13	-0.0568962	NoDiff	43	-1.02519	TCdM
Cluster_100317	5	7180109	7180374	24	5'-2k	Zm00001d013255	0.645783	NoDiff	0	0	NoDiff	0	0	NoDiff	0	0	NoDiff
Cluster_100318	5	7186285	7186723	24	3'-2k	Zm00001d013256	3.61144	NoDiff	0	0	NoDiff	2	0	NoDiff	119	0.0422547	NIM
Cluster_100321	5	7192543	7193046	24	5'-2k	Zm00001d013258	-3.02933	NoDiff	39	2.64718	NoDiff	57	2.46608	NoDiff	127	3.27715	NoDiff
Cluster_100322	5	7210868	7211213	24	Intergenic	-	4.38286	NoDiff	0	1.10516	NoDiff	4	0.0743309	NoDiff	37	0.27256	NIM
Cluster_100323	5	7213416	7213737	24	Intergenic	-	0.221223	AE	12	1.00902	NoDiff	15	1.00575	NoDiff	13	-1	NoDiff
Cluster_100327	5	7242509	7242798	24	Gene body	Zm00001d013259	-1.06579	NoDiff	1	-0.53668	NoDiff	1	0.463415	NoDiff	17	0.298483	NIM
Cluster_100329	5	7244195	7244561	24	Gene body	Zm00001d013259	0.943098	NoDiff	27	-5.56578	NoDiff	16	-4.35392	NoDiff	33	0.857745	NoDiff
Cluster_100330	5	7246323	7246474	24	Gene body	Zm00001d013259	-1.19252	NoDiff	0	0	NoDiff	0	0	NoDiff	0	0	NoDiff
Cluster_100331	5	7246811	7247185	24	Gene body	Zm00001d013259	1.61119	DHPE	6	-0.818371	NoDiff	8	-0.715732	NoDiff	10	-0.241683	NIM
Cluster_100333	5	7258654	7258744	24	Gene body	Zm00001d013259	0.625548	DHPE	0	0	NoDiff	0	0	NoDiff	0	0	NoDiff
Cluster_100337	5	7370650	7371031	24	3'-2k	Zm00001d013262	-0.22257	AE	0	0.914063	NoDiff	0	0.045977	NoDiff	0	-1	NoDiff
Cluster_100338	5	7371796	7372275	24	3'-2k	Zm00001d013262	0.209092	NoDiff	10	1.48891	NoDiff	16	0.389326	NoDiff	135	-1.48697	NoDiff
Cluster_10034	1	91338550	91338907	24	TE	-	0.272594	AE	39	-1.29659	NoDiff	48	-0.125187	NoDiff	95	30.2172	NoDiff
Cluster_100340	5	7377145	7377878	24	Gene body	Zm00001d013262	6.98305	NoDiff	54	1.29957	NoDiff	91	2.83689	NoDiff	201	-0.742297	NoDiff
Cluster_100341	5	7382074	7382982	24	5'-2k	Zm00001d013262	8.3622	NoDiff	51	1.01009	NoDiff	37	2.0266	NoDiff	208	-0.0969503	NoDiff
Cluster_100342	5	7383075	7383909	24	5'-2k	Zm00001d013262	1.63255	NoDiff	94	-1.00349	NoDiff	57	1.20613	NoDiff	184	-0.83508	NoDiff
Cluster_100343	5	7385593	7386051	24	3'-2k	Zm00001d013263	0.318602	AE	0	0.52381	NoDiff	0	1.06258	NoDiff	0	0.451766	NoDiff
Cluster_100344	5	7389697	7390101	24	5'-2k	Zm00001d013263	0.533365	DHPE	21	3.9906	NoDiff	22	2.70992	NoDiff	104	3.56197	TCM
Cluster_100345	5	7390190	7392263	24	5'-2k	Zm00001d013264	0.330998	NoDiff	139	-0.491351	NoDiff	145	0.145884	NoDiff	368	-0.807652	NoDiff
Cluster_100346	5	7395906	7396304	24	3'-2k	Zm00001d013264	-0.261933	NoDiff	17	0.472125	NoDiff	17	0.939805	NoDiff	80	-0.312049	NIM
Cluster_100347	5	7397029	7397370	24	3'-2k	Zm00001d013264	-31.6458	NoDiff	20	-1.79801	NoDiff	18	0.360469	NoDiff	96	-0.494307	NoDiff
Cluster_100348	5	7404493	7405767	24	Gene body	Zm00001d013265	0.682386	DHPE	75	0.573712	NoDiff	52	0.920866	TCM	323	1.71184	TCM
Cluster_100349	5	7409009	7409292	24	5'-2k	Zm00001d013265	2.97393	NoDiff	8	1.31566	NoDiff	10	1.74529	NoDiff	85	-1.30257	NoDiff
Cluster_100351	5	7468557	7469028	24	Intergenic	-	1.10946	DHPE	34	301.647	NoDiff	29	1.39447	NoDiff	140	0.135947	NoDiff
Cluster_100352	5	7469139	7470410	24	Other	-	-0.000538084	AE	127	0.837576	NoDiff	53	2.68495	NoDiff	314	0.59351	NoDiff
Cluster_100353	5	7471176	7472386	24	Other	-	0.587354	DHPE	131	-0.875871	NoDiff	86	0.446066	NoDiff	329	1.40974	NoDiff
Cluster_100354	5	7484120	7484602	24	Intergenic	-	-0.0668263	AE	54	0.599802	NoDiff	32	-1.32253	NoDiff	74	-0.931864	NoDiff
Cluster_100355	5	7484745	7485127	24	Intergenic	-	-0.393146	NoDiff	12	-0.419884	NoDiff	25	-0.0171021	NIM	97	-0.210047	NIM
Cluster_100356	5	7485250	7485420	24	TE	-	0.828041	NoDiff	38	1.00385	NoDiff	21	-0.636837	NoDiff	44	-0.711555	TCdM
Cluster_100357	5	7485554	7485984	24	5'-2k	Zm00001d013267	0.762214	DHPE	46	2.16285	NoDiff	25	0.806015	NoDiff	112	-3.21799	NoDiff
Cluster_100358	5	7490351	7491531	24	Gene body	Zm00001d013267	-0.703595	DLPE	49	0.338915	NIM	51	0.617322	TCM	305	-0.108893	NoDiff
Cluster_100359	5	7493144	7494062	24	Gene body	Zm00001d013267	1.36236	DHPE	0	1.02879	NoDiff	0	1.19128	NoDiff	0	-0.451895	NoDiff
Cluster_10036	1	91363496	91364193	24	Other	-	8.43463	NoDiff	42	1.3819	NoDiff	31	0.912604	NoDiff	109	0.691821	NoDiff
Cluster_100361	5	7494985	7495571	24	Gene body	Zm00001d013267	-0.204169	NoDiff	0	1.04414	NoDiff	0	0.0629086	NoDiff	0	-1	NoDiff
Cluster_100363	5	7496076	7497373	24	Gene body	Zm00001d013267	0.835157	DHPE	0	1.00137	NoDiff	0	0.929109	NoDiff	0	-0.376787	NoDiff
Cluster_100367	5	7508965	7509317	24	5'-2k	Zm00001d013268	0.132838	AE	3	1.0619	NoDiff	3	-0.292357	NoDiff	8	1.25678	TCM
Cluster_10037	1	91420224	91420990	24	5'-2k	Zm00001d029875	3.96461	NoDiff	66	-14.3939	NoDiff	52	0.157039	NoDiff	138	1.56836	NoDiff
Cluster_100370	5	7522896	7523998	24	3'-2k	Zm00001d013270	0.0673353	NoDiff	80	-1.14813	NoDiff	48	-0.206266	NoDiff	291	-0.586548	NoDiff
Cluster_100371	5	7524113	7524566	24	3'-2k	Zm00001d013270	0.12058	NoDiff	32	0.721688	NoDiff	18	0.96105	NoDiff	104	0.471589	NIM
Cluster_100372	5	7533673	7534103	24	5'-2k	Zm00001d013272	0.28356	AE	20	0.646234	NoDiff	15	1.04929	NoDiff	74	0.756964	NoDiff
Cluster_100374	5	7534684	7535297	24	5'-2k	Zm00001d013272	0.169879	AE	20	0.912505	NoDiff	32	0.993991	NoDiff	157	0.730316	NoDiff
Cluster_100375	5	7541155	7541483	24	3'-2k	Zm00001d013273	0.942296	NoDiff	5	1.36703	NoDiff	0	1.178	NoDiff	4	0.295712	NoDiff
Cluster_100377	5	7541837	7542311	24	3'-2k	Zm00001d013272	-0.168863	AE	0	0.804849	NoDiff	0	0.591209	NoDiff	0	0.586818	NoDiff
Cluster_100379	5	7556439	7557634	24	Gene body	Zm00001d013274	-3.95885	NoDiff	99	7.7609	NoDiff	91	0.632829	TCM	238	9.13685	NoDiff
Cluster_10038	1	91421074	91421328	24	5'-2k	Zm00001d029875	-1.65794	NoDiff	10	1.45135	NoDiff	10	1.71904	NoDiff	70	1.46125	TCM
Cluster_100381	5	7559859	7560019	24	5'-2k	Zm00001d013274	0.0865761	NoDiff	4	-1.88708	NoDiff	3	1.37373	NoDiff	34	-0.235288	NIM
Cluster_100388	5	7702068	7702971	24	Gene body	Zm00001d013278	0.743981	DHPE	24	0.352762	NoDiff	15	-0.973496	TCdM	34	1.62169	NoDiff
Cluster_100389	5	7703413	7705552	24	Gene body	Zm00001d013278	-0.392385	AE	121	1.13247	NoDiff	115	0.145731	NoDiff	177	0.780697	NoDiff
Cluster_10039	1	91425465	91426222	24	3'-2k	Zm00001d029875	1.0263	NoDiff	51	1.64165	NoDiff	48	0.266509	NoDiff	164	-0.175719	NIM
Cluster_100390	5	7708792	7709477	24	Gene body	Zm00001d013278	0.303473	NoDiff	55	-1.14308	NoDiff	57	-0.219629	NIM	108	1.328	NoDiff
Cluster_100393	5	7718158	7718434	24	TE	-	-4.09762	NoDiff	0	1.04054	NoDiff	0	1.01856	NoDiff	0	-1	NoDiff
Cluster_100394	5	7727482	7728461	24	Other	-	-0.762285	NoDiff	108	0.819181	TCM	78	0.905199	TCM	282	-0.101622	NoDiff
Cluster_100395	5	7770051	7770160	24	Intergenic	-	0.149695	NoDiff	1	0.4	NoDiff	1	0.666667	NoDiff	3	1.22222	NoDiff
Cluster_100396	5	7770307	7770455	24	TE	-	0.175984	NoDiff	9	0.626528	NoDiff	4	-1.76109	NoDiff	19	-2.51687	NoDiff
Cluster_100398	5	7770909	7771446	24	TE	-	6.21082	NoDiff	12	0.701089	NoDiff	11	0.460015	NoDiff	34	0.16346	NIM
Cluster_100399	5	7774242	7774798	24	5'-2k	Zm00001d013281	1.0781	DHPE	6	1.10156	NoDiff	10	0.921193	NoDiff	60	0.246396	NoDiff
Cluster_100400	5	7791181	7791600	24	Intergenic	-	0.201303	AE	0	0.98814	NoDiff	0	0.882075	NoDiff	0	0.367177	NoDiff
Cluster_100401	5	7792093	7792678	24	Intergenic	-	2.7908	NoDiff	37	0.312317	NIM	29	0.318221	NIM	150	49.2135	NoDiff
Cluster_100402	5	7804590	7805580	24	Intergenic	-	1.35729	NoDiff	48	-0.15706	NoDiff	42	0.606978	NoDiff	208	3.047	NoDiff
Cluster_100403	5	7805851	7806477	24	Intergenic	-	0.628207	NoDiff	54	0.0961943	NoDiff	38	1.0747	NoDiff	151	9.11917	NoDiff
Cluster_100404	5	7807119	7809390	24	3'-2k	Zm00001d013282	0.146539	NoDiff	160	0.137152	NoDiff	146	2.57215	TCM	542	-1.14747	NoDiff
Cluster_100405	5	7816572	7817029	24	3'-2k	Zm00001d013283	-0.057681	AE	22	0.950208	NoDiff	9	0.492349	NoDiff	124	0.528488	NoDiff
Cluster_100406	5	7836887	7837617	24	TE	-	-0.0919246	AE	37	0.704738	NoDiff	52	0.736264	NoDiff	142	1.26201	TCM
Cluster_100407	5	7839103	7839637	24	TE	-	1.65515	NoDiff	3	3.13779	NoDiff	7	67.2003	NoDiff	30	0.0922556	NIM
Cluster_100410	5	7860516	7860667	24	3'-2k	Zm00001d013284	-0.317364	AE	0	0	NoDiff	0	0	NoDiff	0	0	NoDiff
Cluster_100412	5	7907801	7908145	24	TE	-	0.826476	NoDiff	2	-4.27412	NoDiff	3	0.0752477	NoDiff	11	0	NoDiff
Cluster_100413	5	7909109	7909791	24	Intergenic	-	-1.04819	NoDiff	0	0	NoDiff	0	0	NoDiff	0	0	NoDiff
Cluster_100416	5	7916094	7917251	24	Intergenic	-	-0.196869	AE	40	1.35844	NoDiff	42	0.512186	TCM	255	-0.523702	NoDiff
Cluster_100417	5	7917787	7918371	24	3'-2k	Zm00001d013289	-2.14806	NoDiff	50	-0.638772	NoDiff	42	-2.15328	NoDiff	135	-33.9935	NoDiff
Cluster_100418	5	7918528	7918965	24	3'-2k	Zm00001d013289	-0.562241	NoDiff	14	0.580809	NoDiff	13	0.561843	NoDiff	71	-4.21254	TCdM
Cluster_100419	5	7920476	7920629	24	5'-2k	Zm00001d013289	5.25591	NoDiff	2	1.60546	NoDiff	0	1.27008	NoDiff	5	2.20179	NoDiff
Cluster_10042	1	91473008	91473307	24	TE	-	1.026	DHPE	17	5.25993	NoDiff	29	7.23653	NoDiff	56	-0.00732251	NoDiff
Cluster_100421	5	7921348	7922208	24	5'-2k	Zm00001d013289	0.209738	NoDiff	39	1.19118	NoDiff	28	-0.209933	NoDiff	102	-0.125941	NIM
Cluster_100422	5	7922355	7923077	24	5'-2k	Zm00001d013290	0.0136895	AE	0	0.866315	NoDiff	0	0.758991	NoDiff	0	0.386338	NoDiff
Cluster_100423	5	7924406	7924740	24	Gene body	Zm00001d013290	1.27671	NoDiff	0	1.0419	NoDiff	0	1.21795	NoDiff	0	1.0892	NoDiff
Cluster_100425	5	7929824	7930375	24	3'-2k	Zm00001d013290	-0.445372	NoDiff	32	0.54024	NoDiff	28	-0.462815	NoDiff	138	-0.372189	NoDiff
Cluster_100426	5	7930671	7931104	24	Intergenic	-	-0.328828	AE	26	-0.241277	NoDiff	24	-0.397201	NIM	138	-0.666061	TCdM
Cluster_100427	5	7932543	7933019	24	Intergenic	-	-0.9296	DLPE	21	0.414044	NIM	31	0.110827	NIM	150	-0.980759	TCdM
Cluster_100428	5	7933113	7933705	24	Intergenic	-	2.1086	NoDiff	37	-0.201729	NoDiff	45	0.200877	NIM	148	0.357471	NoDiff
Cluster_100429	5	7933858	7934428	24	Intergenic	-	1.3945	NoDiff	31	0.954795	NoDiff	29	0.32391	NoDiff	53	1.26763	NoDiff
Cluster_10043	1	91494197	91494451	24	Intergenic	-	-0.966011	DLPE	38	-0.838354	NoDiff	27	-0.364411	NoDiff	76	-1.41279	NoDiff
Cluster_100431	5	7967230	7967592	24	Intergenic	-	26.244	NoDiff	28	-0.697327	TCdM	13	-0.251528	NIM	45	-1.01452	NoDiff
Cluster_100432	5	7968857	7969717	24	Intergenic	-	-0.0930164	AE	8	0.743722	TCM	8	-10.3649	NoDiff	49	-1.17078	NoDiff
Cluster_100433	5	7974364	7975143	24	5'-2k	Zm00001d013294	-0.60612	DLPE	12	-0.642307	NoDiff	20	0.48254	NoDiff	51	-0.467554	NoDiff
Cluster_100434	5	7977677	7978036	24	Gene body	Zm00001d013294	-0.493534	AE	4	-14.2799	NoDiff	21	0.784361	TCM	104	-0.190038	NIM
Cluster_100435	5	7989264	7989863	24	3'-2k	Zm00001d013295	0.500734	DHPE	51	0.451866	NIM	54	0.6096	TCM	154	-0.21433	NIM
Cluster_100436	5	7993118	7993439	24	5'-2k	Zm00001d013295	0.147476	AE	22	-0.161302	NIM	19	-6.02516	NoDiff	85	-0.639397	TCdM
Cluster_100438	5	8003552	8003732	24	TE	-	-2.78922	NoDiff	3	-1.36257	NoDiff	2	-12.1111	NoDiff	35	-2.16726	NoDiff
Cluster_100439	5	8008831	8009700	24	Gene body	Zm00001d013298	0.0370429	AE	27	0.322293	NoDiff	18	0.720534	NoDiff	43	0.370366	NoDiff
Cluster_10044	1	91495131	91496394	24	Intergenic	-	4.08575	NoDiff	142	0.229632	NoDiff	99	-0.176597	NoDiff	320	1.11473	NoDiff
Cluster_100440	5	8010504	8011278	24	5'-2k	Zm00001d013299	1.16716	DHPE	30	1.26698	NoDiff	34	1.83645	NoDiff	212	2.78881	NoDiff
Cluster_100444	5	8018998	8019262	24	5'-2k	Zm00001d013300	-3.01562	NoDiff	0	0	NoDiff	0	0	NoDiff	0	0	NoDiff
Cluster_100446	5	8055115	8055466	24	Intergenic	-	6.05426	THPE	2	0.678322	NoDiff	2	0.62963	NoDiff	16	0.107143	NoDiff
Cluster_100447	5	8055926	8056265	24	Intergenic	-	-1.52383	NoDiff	0	-1	NoDiff	0	-1	NoDiff	0	-1	NoDiff
Cluster_100448	5	8056350	8056784	24	Intergenic	-	0.584532	DHPE	0	0.920316	NoDiff	0	0.882993	NoDiff	0	1.43878	NoDiff
Cluster_100453	5	8062966	8063284	24	3'-2k	Zm00001d013301	-0.0853361	AE	0	0	NoDiff	0	0	NoDiff	0	0	NoDiff
Cluster_100456	5	8072335	8073706	24	3'-2k	Zm00001d013302	-2.49448	NoDiff	118	42.4347	NoDiff	85	10.6284	NoDiff	295	-4.74424	NoDiff
Cluster_100459	5	8095566	8096412	24	TE	-	0.225961	NoDiff	66	-1.07666	NoDiff	107	3.02781	NoDiff	124	0.675996	NoDiff
Cluster_100460	5	8112601	8112842	24	TE	-	-6.64475	NoDiff	0	0	NoDiff	0	0	NoDiff	0	0	NoDiff
Cluster_100461	5	8159907	8160710	24	TE	-	-1.18487	NoDiff	63	-4.67499	NoDiff	61	0.636672	NoDiff	178	0.312122	NoDiff
Cluster_100462	5	8160897	8161046	24	TE	-	1.60175	NoDiff	0	1.20477	NoDiff	0	1.37576	NoDiff	0	0.592122	NoDiff
Cluster_100463	5	8161178	8161811	24	TE	-	-0.136558	NoDiff	27	-0.334412	NoDiff	34	3.02133	NoDiff	109	-0.623028	NoDiff
Cluster_100464	5	8162165	8162672	24	5'-2k	Zm00001d013303	0.552857	DHPE	0	0	NoDiff	0	0	NoDiff	0	0	NoDiff
Cluster_100468	5	8185794	8186201	24	5'-2k	Zm00001d013307	0.782717	NoDiff	0	1.21316	NoDiff	0	0.427012	NoDiff	0	0.484576	NoDiff
Cluster_100470	5	8192208	8192799	24	5'-2k	Zm00001d013308	-0.443127	AE	0	1.04183	NoDiff	0	0.954196	NoDiff	0	1.17424	NoDiff
Cluster_100471	5	8193634	8194797	24	Intergenic	-	0.240768	AE	0	1.03567	NoDiff	0	0.913719	NoDiff	0	0.897148	NoDiff
Cluster_100472	5	8195056	8195674	24	TE	-	0.101569	AE	0	0.893028	NoDiff	0	1.09646	NoDiff	0	1.05383	NoDiff
Cluster_100477	5	8283250	8283568	24	TE	-	0.179571	AE	31	0.495035	NoDiff	18	0.55255	NoDiff	34	-1.26974	NoDiff
Cluster_100478	5	8285296	8285886	24	TE	-	-0.159391	AE	0	0.957717	NoDiff	0	0.981709	NoDiff	0	0.769988	NoDiff
Cluster_100479	5	8286131	8286441	24	TE	-	-0.574402	DLPE	0	0.975867	NoDiff	0	0.819769	NoDiff	0	0.388118	NoDiff
Cluster_100480	5	8286600	8287915	24	TE	-	-0.147014	AE	0	1.09995	NoDiff	0	1.32117	NoDiff	98	-0.327785	NIM
Cluster_100483	5	8299429	8299783	24	5'-2k	Zm00001d013310	0.143041	AE	36	-0.852299	NoDiff	28	0.478061	NoDiff	101	-1.14671	NoDiff
Cluster_100484	5	8313782	8314318	24	TE	-	0.591621	DHPE	25	-0.404544	NIM	17	1.95572	NoDiff	156	-1.40864	NoDiff
Cluster_100485	5	8318218	8318720	24	5'-2k	Zm00001d013311	0.281341	AE	0	1.303	NoDiff	0	1.28144	NoDiff	2	0.181038	NoDiff
Cluster_100486	5	8343337	8344390	24	Gene body	Zm00001d013312	0.201043	AE	0	0.858416	NoDiff	0	1.17658	NoDiff	0	-1	NoDiff
Cluster_100487	5	8344780	8346608	24	5'-2k	Zm00001d013312	0.182714	AE	7	0.93456	NoDiff	2	0.63305	NoDiff	5	-1.10436	TCdM
Cluster_100488	5	8346705	8347330	24	Intergenic	-	-0.171171	AE	14	1.80042	NoDiff	18	0.311058	NoDiff	133	0.588526	NoDiff
Cluster_100489	5	8347539	8347760	24	Intergenic	-	0.0459876	AE	0	-1	NoDiff	0	1.41124	NoDiff	0	0.876113	NoDiff
Cluster_100490	5	8348043	8348421	24	Intergenic	-	-0.902551	DLPE	0	1.43391	NoDiff	0	0.754531	NoDiff	0	-1	NoDiff
Cluster_100493	5	8368077	8369074	24	Gene body	Zm00001d013314	-0.327511	NoDiff	46	4.07479	NoDiff	31	0.987649	NoDiff	139	-1.95432	NoDiff
Cluster_100494	5	8407592	8407702	24	TE	-	2.76909	NoDiff	2	1.38667	NoDiff	0	0	NoDiff	35	-1.142	NoDiff
Cluster_100497	5	8438605	8438703	24	Intergenic	-	-0.0671969	NoDiff	7	0.822143	NoDiff	12	-0.0231981	NoDiff	26	0.187461	NoDiff
Cluster_100499	5	8497547	8498072	24	5'-2k	Zm00001d013317	0.76512	NoDiff	13	0.157345	NoDiff	39	-0.16617	NoDiff	156	0.0196794	NoDiff
Cluster_1005	1	7483112	7483261	24	Intergenic	-	0.170882	NoDiff	29	1.117	NoDiff	7	0.875915	NoDiff	31	0.244761	NIM
Cluster_100500	5	8498548	8498744	24	5'-2k	Zm00001d013317	1.08128	NoDiff	6	-0.791301	TCdM	8	-0.70423	TCdM	53	-0.128468	NIM
Cluster_100506	5	8616757	8616966	24	3'-2k	Zm00001d013319	-1.19139	NoDiff	4	-1	NoDiff	0	0	NoDiff	14	-1	NoDiff
Cluster_100507	5	8620799	8621273	24	5'-2k	Zm00001d013319	0.526307	DHPE	12	-2.83752	NoDiff	14	2.15236	NoDiff	134	0.506764	TCM
Cluster_100508	5	8621377	8621841	24	5'-2k	Zm00001d013319	0.0190795	AE	24	1.1599	NoDiff	22	1.11421	NoDiff	121	1.08954	NoDiff
Cluster_100509	5	8623805	8624244	24	3'-2k	Zm00001d013320	2.21838	NoDiff	14	0.632475	NoDiff	14	1.76345	NoDiff	39	4.91144	NoDiff
Cluster_10051	1	91627402	91628145	24	3'-2k	Zm00001d029878	-358.682	NoDiff	44	4.34513	NoDiff	44	0.8611	NoDiff	202	-0.331104	NoDiff
Cluster_100510	5	8628904	8629992	24	5'-2k	Zm00001d013320	-0.0992553	AE	0	1.03529	NoDiff	0	0.943278	NoDiff	0	1.5753	NoDiff
Cluster_100512	5	8680251	8681194	24	5'-2k	Zm00001d013322	0.0569488	AE	0	1.03429	NoDiff	0	0.98447	NoDiff	0	0.248769	NoDiff
Cluster_100514	5	8684684	8684809	24	3'-2k	Zm00001d013325	-0.165141	NoDiff	0	0	NoDiff	0	0	NoDiff	0	0	NoDiff
Cluster_100515	5	8692038	8692162	24	5'-2k	Zm00001d013326	-0.276847	AE	0	0	NoDiff	0	0	NoDiff	0	0	NoDiff
Cluster_100516	5	8694053	8694254	24	3'-2k	Zm00001d013326	2.04299	NoDiff	0	0	NoDiff	0	0	NoDiff	0	0	NoDiff
Cluster_100517	5	8702883	8703332	24	3'-2k	Zm00001d013327	0.0315137	AE	43	-0.00506513	NIM	37	-0.168283	NIM	113	-2.03917	NoDiff
Cluster_100518	5	8760078	8760266	24	Intergenic	-	-0.333193	AE	0	-0.163506	NoDiff	0	-0.592018	NoDiff	0	0.865187	NoDiff
Cluster_100520	5	8762591	8762967	24	5'-2k	Zm00001d013329	-0.404257	AE	20	1.98667	NoDiff	20	1.28119	NoDiff	80	0.70477	TCM
Cluster_100522	5	8801241	8801607	24	3'-2k	Zm00001d013331	-8.77236	NoDiff	0	-1	NoDiff	0	0.728528	NoDiff	0	-1	NoDiff
Cluster_100524	5	8814049	8814356	24	5'-2k	Zm00001d013333	0.145093	NoDiff	0	1.26942	NoDiff	0	1.23443	NoDiff	0	0.012719	NoDiff
Cluster_100525	5	8814468	8814822	24	5'-2k	Zm00001d013333	-0.372893	AE	0	0.966695	NoDiff	0	0.892508	NoDiff	0	-0.407562	NoDiff
Cluster_100526	5	8822402	8823164	24	TE	-	-0.0507777	NoDiff	0	1.0272	NoDiff	0	0.627344	NoDiff	0	1.56755	NoDiff
Cluster_100528	5	8853239	8853821	24	5'-2k	Zm00001d013335	0.139967	NoDiff	22	-0.544264	NoDiff	18	-0.584227	TCdM	116	-0.205613	NIM
Cluster_100529	5	8860128	8860386	24	3'-2k	Zm00001d013335	-2.87223	NoDiff	0	0	NoDiff	0	0	NoDiff	0	0	NoDiff
Cluster_10053	1	91642149	91642491	24	Intergenic	-	-4.71852	NoDiff	22	3.54926	NoDiff	21	-0.701879	NoDiff	103	-1.3222	NoDiff
Cluster_100531	5	8869577	8870927	24	3'-2k	Zm00001d013336	0.0570599	AE	12	0.901932	NoDiff	40	0.965213	NoDiff	69	-0.308485	NoDiff
Cluster_100532	5	8876172	8876559	24	Intergenic	-	-0.608545	NoDiff	0	1.14447	NoDiff	0	1.18509	NoDiff	0	0.751369	NoDiff
Cluster_100533	5	8876814	8877102	24	Intergenic	-	0.790519	DHPE	10	2.81989	NoDiff	15	7.58	NoDiff	40	0.420836	NIM
Cluster_100535	5	8893656	8894029	24	Other	-	-0.0443633	NoDiff	14	0.795932	NoDiff	9	0.996192	NoDiff	29	14.9656	NoDiff
Cluster_100536	5	8895150	8895788	24	Other	-	5.99736	NoDiff	60	1.00972	NoDiff	23	0.268077	NoDiff	119	2.23028	TCM
Cluster_100537	5	8897580	8897993	24	5'-2k	Zm00001d013339	0.0741445	NoDiff	2	0.496229	NoDiff	5	1.90766	NoDiff	32	0.870981	TCM
Cluster_100539	5	8903510	8903705	24	3'-2k	Zm00001d013340	-0.436466	NoDiff	0	1.07072	NoDiff	0	0.767521	NoDiff	0	-0.0663524	NIM
Cluster_10054	1	91642677	91642759	24	Intergenic	-	0.523939	DHPE	3	-3.43112	NoDiff	4	-1.65766	NoDiff	10	-12.4357	NoDiff
Cluster_100541	5	8963866	8963986	24	TE	-	1.31683	NoDiff	0	3.8779	NoDiff	0	1.38254	NoDiff	0	0.536585	NoDiff
Cluster_100542	5	8964290	8964607	24	Intergenic	-	0.232569	NoDiff	6	0.560591	NoDiff	8	1.09091	NoDiff	7	0.714286	NoDiff
Cluster_100543	5	8966204	8966348	24	5'-2k	Zm00001d013342	-0.615202	NoDiff	0	0	NoDiff	0	0	NoDiff	0	0	NoDiff
Cluster_100545	5	8970516	8971055	24	Gene body	Zm00001d013343	0.467521	NoDiff	15	-1.12963	NoDiff	10	-28.693	NoDiff	28	-2.84312	NoDiff
Cluster_100546	5	8972788	8973381	24	5'-2k	Zm00001d013343	0.134756	AE	0	0.173229	NoDiff	0	1.50299	NoDiff	0	0.180988	NIM
Cluster_100547	5	8974251	8974817	24	Intergenic	-	0.0840927	NoDiff	3	0.476862	NoDiff	2	1.30007	NoDiff	25	0.325163	NIM
Cluster_100548	5	8976237	8976441	24	3'-2k	Zm00001d013344	-0.0374553	AE	0	0	NoDiff	0	0	NoDiff	0	0	NoDiff
Cluster_100549	5	8980978	8981412	24	5'-2k	Zm00001d013344	-0.37509	AE	0	0.882418	NoDiff	0	0.498889	NoDiff	0	-0.696674	NoDiff
Cluster_100551	5	9053461	9053700	24	Gene body	Zm00001d013346	0.484961	AE	27	0.994531	NoDiff	26	2.42076	NoDiff	32	0.672858	NoDiff
Cluster_100553	5	9057333	9059204	24	Gene body	Zm00001d013346	0.0221618	AE	168	1.01458	NoDiff	187	1.01985	NoDiff	568	0.798662	NoDiff
Cluster_100556	5	9061022	9061981	24	Gene body	Zm00001d013346	0.466262	AE	129	0.996572	NoDiff	96	0.927215	NoDiff	260	0.0904106	NoDiff
Cluster_100557	5	9063266	9063507	24	5'-2k	Zm00001d013346	-0.0837966	AE	7	0.948332	NoDiff	9	-0.0228884	NoDiff	36	1.14846	NoDiff
Cluster_100559	5	9101069	9101697	24	TE	-	0.29456	AE	61	-5.9654	NoDiff	62	2.25687	NoDiff	155	-0.872671	NoDiff
Cluster_100560	5	9101988	9102777	24	Intergenic	-	0.0361513	AE	81	0.147468	NoDiff	87	1.07643	TCM	133	2.50907	NoDiff
Cluster_100561	5	9113907	9114272	24	TE	-	-2.78993	NoDiff	35	2.80525	NoDiff	28	32.4253	NoDiff	65	-0.222772	NoDiff
Cluster_100562	5	9122471	9122948	24	TE	-	0.288035	AE	46	1.16541	NoDiff	30	1.1328	NoDiff	86	1.73451	NoDiff
Cluster_100563	5	9123516	9124655	24	Intergenic	-	0.365304	AE	71	4.11847	NoDiff	66	9.57303	NoDiff	276	0.275727	NIM
Cluster_100565	5	9128330	9128837	24	Intergenic	-	-0.319718	AE	30	1.06143	NoDiff	20	1.69108	NoDiff	58	1.31504	NoDiff
Cluster_100566	5	9128927	9129517	24	Intergenic	-	-0.0886978	AE	34	1.0899	NoDiff	23	0.536521	NoDiff	143	0.140405	NoDiff
Cluster_100567	5	9157913	9158080	24	Intergenic	-	-0.258602	NoDiff	0	0	NoDiff	0	0	NoDiff	0	0	NoDiff
Cluster_100568	5	9159731	9160013	24	TE	-	0.00992792	AE	0	0	NoDiff	0	0	NoDiff	0	0	NoDiff
Cluster_10057	1	91724966	91726097	24	TE	-	-0.284745	NoDiff	118	0.530926	TCM	130	-0.0516599	NIM	318	-0.808844	NoDiff
Cluster_100571	5	9185278	9185819	24	Gene body	Zm00001d013348	3.6663	NoDiff	4	1.27914	NoDiff	2	2.02862	NoDiff	7	0.76	NoDiff
Cluster_100573	5	9187937	9188530	24	Gene body	Zm00001d013348	-1.10093	NoDiff	0	59.5268	NoDiff	0	3.57143	NoDiff	0	-1	NoDiff
Cluster_100576	5	9273797	9274332	24	TE	-	0.500583	NoDiff	58	-0.224515	NoDiff	71	10.729	NoDiff	130	-1.23064	NoDiff
Cluster_100578	5	9278314	9279076	24	TE	-	3.88791	NoDiff	96	1.09962	NoDiff	57	0.635537	TCM	167	3.97226	NoDiff
Cluster_100580	5	9287351	9287665	24	TE	-	-1	NoDiff	18	0.329493	NoDiff	16	2.54399	NoDiff	32	4.501	NoDiff
Cluster_100584	5	9444917	9445965	24	Intergenic	-	1.3796	NoDiff	75	3.44953	NoDiff	63	0.52249	NoDiff	241	0.397073	NoDiff
Cluster_100586	5	9465742	9466857	24	3'-2k	Zm00001d013357	-0.643698	DLPE	0	1.07792	NoDiff	0	0.89599	NoDiff	0	-0.826171	NoDiff
Cluster_100589	5	9521806	9522099	24	3'-2k	Zm00001d013358	-0.469218	NoDiff	0	0	NoDiff	0	0	NoDiff	0	0	NoDiff
Cluster_10059	1	91769982	91770452	24	TE	-	0.787063	DHPE	38	2.60956	NoDiff	22	-0.0578931	NIM	118	0.208287	NoDiff
Cluster_100592	5	9543937	9544092	24	5'-2k	Zm00001d013360	-0.886869	DLPE	0	1.5	NoDiff	0	-0.711538	NoDiff	0	0	NoDiff
Cluster_100594	5	9587148	9587499	24	5'-2k	Zm00001d013361	0.0631177	NoDiff	8	0.133233	NoDiff	5	-7.55488	NoDiff	30	-0.150759	NoDiff
Cluster_100597	5	9593104	9593438	24	Intergenic	-	-0.237526	AE	0	-1	NoDiff	0	-1	NoDiff	0	-1	NoDiff
Cluster_100599	5	9603348	9603636	24	Intergenic	-	-0.469543	NoDiff	0	0	NoDiff	0	0	NoDiff	0	0	NoDiff
Cluster_1006	1	7483400	7483638	24	Intergenic	-	0.547049	DHPE	24	-0.170961	NoDiff	13	0.728467	NoDiff	34	0.228092	NIM
Cluster_10060	1	91813417	91813672	24	5'-2k	Zm00001d029879	Inf	NoDiff	36	-0.258597	NoDiff	15	-0.0157513	NoDiff	77	3.01051	NoDiff
Cluster_100601	5	9694519	9694844	24	Intergenic	-	5.16309	THPE	10	-4.4835	NoDiff	18	-4.01005	NoDiff	93	-0.858183	NoDiff
Cluster_100602	5	9728892	9729405	24	Intergenic	-	-0.396596	AE	28	1.51734	NoDiff	31	1.74433	TCM	60	-0.0813486	NoDiff
Cluster_100604	5	9729934	9730336	24	Intergenic	-	3.82638	NoDiff	25	-8.49256	NoDiff	19	-0.289775	NoDiff	86	0.352125	NIM
Cluster_100605	5	9730545	9730886	24	Intergenic	-	-0.404303	AE	13	-1.16402	NoDiff	12	-1.29009	NoDiff	17	-1.11891	NoDiff
Cluster_100607	5	9732947	9733520	24	TE	-	-0.13132	AE	29	0.694492	NoDiff	25	0.696652	NoDiff	117	0.789808	NoDiff
Cluster_100608	5	9733872	9734429	24	5'-2k	Zm00001d013364	0.0288277	AE	39	1.43297	NoDiff	21	0.675175	NoDiff	95	-0.341301	NoDiff
Cluster_100610	5	9740661	9741701	24	3'-2k	Zm00001d013364	0.644714	DHPE	43	-0.161202	NoDiff	37	0.629646	NoDiff	156	2.63729	NoDiff
Cluster_100612	5	9762818	9762999	24	Intergenic	-	0.347478	AE	0	0	NoDiff	0	0	NoDiff	0	0	NoDiff
Cluster_100613	5	9786650	9787014	24	Intergenic	-	-0.217739	AE	0	0	NoDiff	0	0	NoDiff	0	0	NoDiff
Cluster_100615	5	9834376	9834745	24	3'-2k	Zm00001d013367	-1	DLPE	14	1.0799	NoDiff	2	1.04532	NoDiff	86	0.533547	NoDiff
Cluster_100618	5	9838896	9839678	24	5'-2k	Zm00001d013367	14.3525	NoDiff	32	0.396111	NIM	18	0.859621	NoDiff	158	0.719072	NoDiff
Cluster_10062	1	91815631	91816094	24	Gene body	Zm00001d029879	-0.260861	AE	3	0.630255	NoDiff	4	-1.01528	TCdM	21	1.00033	NoDiff
Cluster_100620	5	9859852	9860194	24	Intergenic	-	0.403317	AE	20	127.121	NoDiff	22	2.19258	NoDiff	93	-0.338377	NoDiff
Cluster_100622	5	9861833	9862146	24	Intergenic	-	0.999237	DHPE	5	0.968082	NoDiff	7	0.908508	NoDiff	31	-0.886992	NoDiff
Cluster_100624	5	9889752	9890041	24	Intergenic	-	0.324762	AE	0	0	NoDiff	0	0	NoDiff	0	0	NoDiff
Cluster_100626	5	9975253	9975704	24	3'-2k	Zm00001d013370	0.276913	AE	4	1.59117	TCM	6	19.6275	NoDiff	30	62.0027	NoDiff
Cluster_100627	5	9976302	9976614	24	3'-2k	Zm00001d013371	-0.354851	AE	0	0.955469	NoDiff	0	0.727576	NoDiff	0	0.792072	TCM
Cluster_100628	5	9976705	9977175	24	3'-2k	Zm00001d013371	-0.165391	AE	0	0.130681	NoDiff	1	0.96589	NoDiff	9	-0.449433	NIM
Cluster_10063	1	91816282	91816558	24	Gene body	Zm00001d029879	-0.452554	AE	16	3.27359	NoDiff	16	-0.104332	NoDiff	72	-0.0025825	NoDiff
Cluster_100631	5	9988514	9988875	24	3'-2k	Zm00001d013373	-1.01696	DLPE	12	-1.26504	NoDiff	9	-0.0455629	NoDiff	28	-0.915557	NoDiff
Cluster_100632	5	9989020	9990067	24	3'-2k	Zm00001d013375	0.161878	AE	47	0.0764411	NIM	74	0.790436	TCM	317	-1.43334	NoDiff
Cluster_100633	5	10011826	10012269	24	Intergenic	-	-0.0788448	AE	0	1.06376	NoDiff	0	1.02586	NoDiff	0	0.667484	NoDiff
Cluster_100634	5	10013865	10014126	24	Intergenic	-	-0.860899	DLPE	3	-0.595953	NoDiff	17	-0.646242	TCdM	64	-0.518848	TCdM
Cluster_100635	5	10014205	10014550	24	Intergenic	-	-0.068234	AE	4	0.219487	NIM	0	1.76596	NoDiff	1	-0.08264	NIM
Cluster_100636	5	10014672	10015277	24	Intergenic	-	-0.227029	AE	19	0.649114	NoDiff	20	0.367414	NoDiff	90	-1.18676	TCdM
Cluster_100637	5	10016157	10016841	24	3'-2k	Zm00001d013377	0.494496	NoDiff	10	0.834206	NoDiff	37	0.880049	TCM	201	0.448982	NoDiff
Cluster_100638	5	10016928	10017436	24	Gene body	Zm00001d013377	1.07489	DHPE	3	-1.06593	TCdM	1	0.151501	NoDiff	12	0.0954013	NoDiff
Cluster_100639	5	10018079	10018521	24	Gene body	Zm00001d013377	2.32868	THPE	8	1.76349	NoDiff	9	0.872383	NoDiff	73	0.36132	NIM
Cluster_10064	1	91818045	91818743	24	Gene body	Zm00001d029879	0.721841	NoDiff	24	0.397182	NIM	11	-0.1944	NoDiff	136	-1.07175	TCdM
Cluster_100640	5	10018604	10018895	24	Gene body	Zm00001d013377	1.47517	DHPE	2	1.18018	NoDiff	11	0.919288	NoDiff	23	0.850988	NoDiff
Cluster_100641	5	10020248	10020494	24	5'-2k	Zm00001d013378	0.235209	AE	10	-0.150079	NoDiff	11	-0.433802	NoDiff	25	-0.184832	NoDiff
Cluster_100642	5	10022652	10023154	24	3'-2k	Zm00001d013379	-6.79603	NoDiff	0	0.28655	NoDiff	0	0.236543	NoDiff	0	-1	NoDiff
Cluster_100644	5	10025964	10027101	24	5'-2k	Zm00001d013379	0.371843	AE	98	-0.17388	NIM	77	-0.097391	NIM	279	1.10095	NoDiff
Cluster_100646	5	10040867	10041155	24	5'-2k	Zm00001d013380	-0.259564	AE	6	0.729915	NoDiff	6	1.07756	NoDiff	75	-2.83116	NoDiff
Cluster_100648	5	10046365	10047205	24	Gene body	Zm00001d013380	-0.278264	NoDiff	2	1.1527	NoDiff	13	0.897729	TCM	47	3.81965	NoDiff
Cluster_100649	5	10051955	10052548	24	Gene body	Zm00001d013380	611.232	NoDiff	41	0.635724	NoDiff	39	-0.301546	NoDiff	132	-16.0437	NoDiff
Cluster_10065	1	91818855	91818990	24	Gene body	Zm00001d029879	0.385604	AE	0	0	NoDiff	0	0	NoDiff	0	0	NoDiff
Cluster_100650	5	10092490	10092681	24	5'-2k	Zm00001d013381	10.6913	NoDiff	4	0.138639	NIM	6	0.715933	TCM	29	1.57924	NoDiff
Cluster_100651	5	10094041	10094687	24	3'-2k	Zm00001d013381	1.11124	DHPE	37	0.872079	NoDiff	34	0.248637	NoDiff	164	0.153701	NoDiff
Cluster_100653	5	10151748	10152863	24	3'-2k	Zm00001d013383	-2.96346	NoDiff	2	1.6	NoDiff	6	0.706273	NoDiff	17	0	NoDiff
Cluster_100654	5	10152962	10153381	24	3'-2k	Zm00001d013383	0.145514	AE	36	0.727654	TCM	24	0.0644828	NIM	60	-0.400352	NoDiff
Cluster_100656	5	10162434	10163092	24	Intergenic	-	-0.25775	AE	24	0.615588	NoDiff	32	0.369242	NoDiff	184	4.89418	NoDiff
Cluster_100657	5	10172382	10172854	24	5'-2k	Zm00001d013385	-0.920302	DLPE	0	0	NoDiff	0	0	NoDiff	0	0	NoDiff
Cluster_100658	5	10176822	10177286	24	TE	-	0.384753	NoDiff	54	-7.03369	NoDiff	16	0.869437	NoDiff	124	-0.629996	TCdM
Cluster_100659	5	10188650	10188836	24	TE	-	1.19618	NoDiff	0	0.0310263	NoDiff	0	-0.20274	NoDiff	0	-1	NoDiff
Cluster_10066	1	91819760	91820264	24	3'-2k	Zm00001d029879	0.137486	NoDiff	28	0.182871	NIM	41	-0.175186	NIM	140	-0.407731	NoDiff
Cluster_100660	5	10189383	10190168	24	Intergenic	-	0.000361811	AE	0	1.09635	NoDiff	0	1.32144	NoDiff	0	-0.504417	NoDiff
Cluster_100662	5	10206199	10206436	24	Intergenic	-	-0.94866	DLPE	0	1.08718	NoDiff	0	0.963768	NoDiff	0	2.08558	NoDiff
Cluster_100663	5	10210551	10211207	24	Intergenic	-	0.163064	AE	12	0.571398	TCM	14	0.77619	TCM	49	-0.956653	NoDiff
Cluster_100664	5	10211297	10212365	24	5'-2k	Zm00001d013386	0.278598	AE	48	1.57818	NoDiff	46	7.59891	NoDiff	105	-0.606025	NoDiff
Cluster_100665	5	10213388	10213970	24	3'-2k	Zm00001d013388	0.730088	DHPE	0	1.05511	NoDiff	0	1.11551	NoDiff	0	-0.162807	NoDiff
Cluster_100666	5	10218974	10219318	24	3'-2k	Zm00001d013387	-0.211952	AE	0	1.00852	NoDiff	0	0.958549	NoDiff	0	1.29699	NoDiff
Cluster_100668	5	10240668	10241296	24	Intergenic	-	-0.421257	NoDiff	0	1.08265	NoDiff	0	0.898872	NoDiff	0	0.302109	NoDiff
Cluster_100669	5	10251573	10251708	24	Intergenic	-	-0.402072	AE	2	1.06109	NoDiff	3	0.372827	NoDiff	24	-0.839226	TCdM
Cluster_10067	1	91824237	91824901	24	Intergenic	-	0.649769	NoDiff	26	-0.933799	NoDiff	51	-5.54515	NoDiff	164	-0.504035	NoDiff
Cluster_100671	5	10253344	10253527	24	5'-2k	Zm00001d013389	0.702098	DHPE	5	0.391824	NoDiff	5	-1.36694	NoDiff	29	0.572362	NoDiff
Cluster_100672	5	10256504	10258083	24	Gene body	Zm00001d013389	-0.373162	NoDiff	8	-0.0237307	NoDiff	16	0.350646	NoDiff	47	0.23191	NoDiff
Cluster_100674	5	10263396	10263708	24	Gene body	Zm00001d013390	0.584935	NoDiff	0	0.44819	NoDiff	0	0.402725	NoDiff	1	0.137276	NoDiff
Cluster_100675	5	10264551	10265151	24	5'-2k	Zm00001d013390	-0.383426	AE	15	0.572784	TCM	14	0.420868	NIM	28	-0.11513	NoDiff
Cluster_100676	5	10266591	10267534	24	3'-2k	Zm00001d013391	0.157275	AE	39	0.535134	TCM	45	0.140937	NIM	240	-1.10598	NoDiff
Cluster_100677	5	10272593	10272976	24	Gene body	Zm00001d013391	-1.74504	NoDiff	21	0.423422	NoDiff	17	2.12618	NoDiff	103	-1.18273	NoDiff
Cluster_100679	5	10277014	10278089	24	5'-2k	Zm00001d013391	-1.53875	NoDiff	51	4.66446	NoDiff	41	1.22179	NoDiff	304	-0.13987	NoDiff
Cluster_10068	1	91825264	91826163	24	TE	-	1.21487	NoDiff	46	-0.821254	NoDiff	30	-0.326261	NIM	94	-0.865845	NoDiff
Cluster_100681	5	10299352	10302230	24	TE	-	-0.0184895	AE	222	1.0466	NoDiff	146	0.902357	NoDiff	340	0.242002	NoDiff
Cluster_100682	5	10303843	10304302	24	3'-2k	Zm00001d013392	-0.945613	NoDiff	27	-1.12293	TCdM	18	0.337769	NIM	54	-2.92553	NoDiff
Cluster_100683	5	10305731	10306544	24	5'-2k	Zm00001d013392	0.0604577	NoDiff	80	-0.362227	NoDiff	38	-0.146232	NoDiff	202	0.48673	NoDiff
Cluster_100685	5	10320288	10320689	24	5'-2k	Zm00001d013393	19.7173	NoDiff	58	-6.4558	NoDiff	33	0.263407	NoDiff	117	-0.437403	NoDiff
Cluster_100687	5	10322080	10322936	24	Gene body	Zm00001d013393	0.155018	NoDiff	45	1.57391	NoDiff	65	0.654356	NoDiff	207	-0.446746	NoDiff
Cluster_100689	5	10325741	10326443	24	Gene body	Zm00001d013393	2.87044	NoDiff	24	0.767735	NoDiff	30	2.28717	NoDiff	213	-0.0816429	NoDiff
Cluster_100690	5	10326821	10327217	24	Gene body	Zm00001d013393	0.660091	NoDiff	28	0.686498	TCM	39	0.560935	TCM	105	-0.678735	NoDiff
Cluster_100691	5	10327436	10327734	24	Gene body	Zm00001d013393	0.423952	AE	29	-0.0476107	NIM	24	-0.187211	NIM	48	-0.816612	NoDiff
Cluster_100692	5	10327847	10328422	24	Gene body	Zm00001d013393	-0.900092	NoDiff	5	-0.307662	NIM	7	-0.34956	NIM	15	-4.90517	NoDiff
Cluster_100693	5	10329012	10329872	24	3'-2k	Zm00001d013395	-0.000406309	AE	26	-0.994577	NoDiff	30	-0.994768	NoDiff	216	-0.0542911	NoDiff
Cluster_100694	5	10332373	10333221	24	5'-2k	Zm00001d013395	-0.0108116	AE	22	0.655933	TCM	9	0.558605	TCM	91	0.357983	NIM
Cluster_100695	5	10333308	10333559	24	5'-2k	Zm00001d013395	0.0175591	AE	9	-0.537217	NoDiff	4	-0.87279	NoDiff	26	0.0226742	NIM
Cluster_100696	5	10333827	10334393	24	Intergenic	-	-0.0894114	AE	0	0.800259	NoDiff	0	0.501044	NoDiff	0	0.907321	NoDiff
Cluster_100697	5	10335052	10335404	24	Intergenic	-	0.309659	AE	2	1.5072	NoDiff	2	0.860903	NoDiff	19	0.222014	NIM
Cluster_100698	5	10337094	10337328	24	TE	-	1.62625	NoDiff	13	0.280466	NoDiff	4	0.273291	NoDiff	20	-0.354667	NIM
Cluster_100699	5	10339077	10339283	24	TE	-	-0.0553478	AE	0	0.893599	NoDiff	0	2.28439	NoDiff	0	1.91758	NoDiff
Cluster_1007	1	7489422	7490277	24	3'-2k	Zm00001d027530	9.4735	NoDiff	65	2.71266	NoDiff	30	0.882188	NoDiff	28	-1.06358	TCdM
Cluster_10070	1	91828910	91829052	24	TE	-	0.186291	AE	6	-5.479	NoDiff	2	0.293706	NoDiff	37	-0.924884	NoDiff
Cluster_100700	5	10345991	10347301	24	5'-2k	Zm00001d013397	0.698513	NoDiff	24	0.704901	NoDiff	13	0.313827	NoDiff	150	-0.142137	NIM
Cluster_100701	5	10352777	10352926	24	3'-2k	Zm00001d013397	0.802067	NoDiff	0	0	NoDiff	0	0	NoDiff	0	0	NoDiff
Cluster_100703	5	10404054	10404204	24	3'-2k	Zm00001d013399	-1	DLPE	18	0.0664888	NoDiff	7	-0.206589	NoDiff	8	-1	NoDiff
Cluster_100705	5	10445167	10445435	24	Intergenic	-	-0.326228	AE	0	1.24535	NoDiff	0	1.17915	NoDiff	0	1.08162	NoDiff
Cluster_100706	5	10446848	10446943	24	Intergenic	-	-0.813759	NoDiff	10	-18.8051	NoDiff	14	-1.48163	NoDiff	17	-1.26414	NoDiff
Cluster_100707	5	10467086	10467976	24	TE	-	0.257972	NoDiff	0	-1	NoDiff	0	-1	NoDiff	0	0	NoDiff
Cluster_100708	5	10468051	10468704	24	TE	-	-0.063559	AE	21	-1.06469	TCdM	18	1.25951	NoDiff	53	0.867121	NoDiff
Cluster_100709	5	10469158	10471717	24	5'-2k	Zm00001d013402	0.186725	AE	34	1.22413	NoDiff	42	-0.484661	NIM	114	-1.85272	NoDiff
Cluster_100710	5	10479075	10479284	24	3'-2k	Zm00001d013402	9.81341	NoDiff	8	6.38128	NoDiff	9	0.917237	NoDiff	43	-1.53175	NoDiff
Cluster_100713	5	10482649	10482998	24	Other	-	-1.25829	NoDiff	26	-0.395325	NoDiff	29	0.511065	NoDiff	76	-1.30762	NoDiff
Cluster_100714	5	10483595	10483813	24	Other	-	-2.36983	NoDiff	0	0	NoDiff	0	0	NoDiff	0	0	NoDiff
Cluster_100715	5	10484911	10485107	24	5'-2k	Zm00001d013405	-0.429896	NoDiff	0	0	NoDiff	0	0	NoDiff	0	0	NoDiff
Cluster_100716	5	10485195	10485572	24	5'-2k	Zm00001d013405	-1.1456	NoDiff	9	0.015873	NoDiff	5	0.665281	NoDiff	22	-0.295902	NIM
Cluster_100717	5	10486018	10486275	24	5'-2k	Zm00001d013405	7.52334	NoDiff	15	3.18509	NoDiff	15	0.688007	NoDiff	38	0.796744	NoDiff
Cluster_100718	5	10490626	10491130	24	Gene body	Zm00001d013405	-0.287148	AE	14	0.732978	NoDiff	40	0.327116	NIM	128	-0.0232394	NoDiff
Cluster_100719	5	10495214	10495987	24	3'-2k	Zm00001d013405	0.854143	NoDiff	56	0.450928	NIM	36	0.900171	TCM	183	2.64673	NoDiff
Cluster_10072	1	91843306	91844481	24	Intergenic	-	0.387877	NoDiff	84	-1.2463	NoDiff	58	0.0472337	NoDiff	142	-0.188031	NoDiff
Cluster_100726	5	10531084	10531364	24	Intergenic	-	-0.108645	AE	6	1.18071	NoDiff	2	1.14389	NoDiff	97	1.26164	NoDiff
Cluster_100727	5	10533219	10533671	24	Intergenic	-	0.139527	AE	32	1.16076	NoDiff	22	0.650721	NoDiff	114	1.07351	NoDiff
Cluster_100728	5	10533907	10534483	24	Intergenic	-	0.700423	DHPE	28	1.04311	NoDiff	40	1.13698	NoDiff	145	0.441284	NoDiff
Cluster_100729	5	10534788	10535215	24	Intergenic	-	0.181488	AE	12	4.81212	NoDiff	10	6.97978	NoDiff	29	4.65462	NoDiff
Cluster_10073	1	91844678	91845743	24	Intergenic	-	-0.303004	AE	75	-1.18197	NoDiff	95	-0.761675	TCdM	180	-2.57544	NoDiff
Cluster_100730	5	10536182	10536723	24	Intergenic	-	0.337622	AE	10	1.09945	NoDiff	20	1.03775	NoDiff	166	0.653593	NoDiff
Cluster_100732	5	10537588	10537803	24	Intergenic	-	0.63381	DHPE	4	1.4199	NoDiff	20	1.93933	NoDiff	51	1.7524	NoDiff
Cluster_100733	5	10538993	10539555	24	3'-2k	Zm00001d013409	0.0805606	AE	36	0.83069	NoDiff	29	0.804946	NoDiff	151	0.687553	NoDiff
Cluster_100734	5	10542009	10542477	24	5'-2k	Zm00001d013409	-0.455432	AE	10	1.62038	NoDiff	22	0.401106	NoDiff	119	-0.234655	NIM
Cluster_100735	5	10543286	10543432	24	5'-2k	Zm00001d013409	-0.554028	DLPE	12	0.868533	NoDiff	11	1.14109	NoDiff	18	0.952917	TCM
Cluster_100736	5	10543996	10544479	24	TE	-	0.0233982	AE	6	1.01633	NoDiff	8	1.3814	NoDiff	5	-0.625118	TCdM
Cluster_100737	5	10544600	10545090	24	TE	-	1.23453	NoDiff	0	0.990826	NoDiff	0	0.910696	NoDiff	0	-1	NoDiff
Cluster_100739	5	10547576	10547872	24	TE	-	1.14533	NoDiff	6	0.607865	NoDiff	2	0.075	NoDiff	3	-1	NoDiff
Cluster_10074	1	91858337	91858637	24	Intergenic	-	-0.000400748	AE	35	2.10233	NoDiff	27	0.893935	NoDiff	41	-1.6097	NoDiff
Cluster_100741	5	10549423	10549787	24	3'-2k	Zm00001d013410	0.0566582	NoDiff	12	2.93699	NoDiff	8	0.551691	NoDiff	91	0.0964283	NIM
Cluster_100742	5	10551217	10551418	24	3'-2k	Zm00001d013410	-0.151881	AE	0	0.625092	NoDiff	2	2.82357	NoDiff	7	0.851664	TCM
Cluster_100743	5	10554622	10555231	24	5'-2k	Zm00001d013410	0.139084	AE	0	1.39174	NoDiff	0	1.11972	NoDiff	0	0.137319	NoDiff
Cluster_100744	5	10555319	10556418	24	5'-2k	Zm00001d013410	-0.0414587	AE	10	1.06219	NoDiff	6	0.969517	NoDiff	23	-1.52196	TCdM
Cluster_100745	5	10556501	10557472	24	3'-2k	Zm00001d013411	0.287014	AE	0	0.990801	NoDiff	0	0.85346	NoDiff	0	0.759207	NoDiff
Cluster_100746	5	10560768	10561311	24	5'-2k	Zm00001d013411	0.725938	NoDiff	39	-1.15575	NoDiff	44	3.96549	NoDiff	90	1.82373	NoDiff
Cluster_100747	5	10561942	10562218	24	5'-2k	Zm00001d013411	0.901817	NoDiff	25	-0.77054	NoDiff	11	-1.02147	NoDiff	69	3.49353	NoDiff
Cluster_100748	5	10599000	10599916	24	3'-2k	Zm00001d013412	-4.27318	NoDiff	39	0.256469	NoDiff	34	-1.9552	NoDiff	82	-2.29776	NoDiff
Cluster_100749	5	10609143	10609717	24	5'-2k	Zm00001d013412	-0.54975	NoDiff	47	1.33982	NoDiff	37	1.03383	NoDiff	126	-1.41973	NoDiff
Cluster_100751	5	10638167	10639175	24	Intergenic	-	0.497164	NoDiff	35	-0.188282	NIM	17	-1.52369	TCdM	183	0.0199567	NIM
Cluster_100752	5	10639300	10640214	24	Intergenic	-	-1.0202	NoDiff	102	-0.13379	NoDiff	48	-0.18506	NoDiff	141	-0.961052	NoDiff
Cluster_100753	5	10644570	10645222	24	Intergenic	-	0.973112	NoDiff	59	-1.64314	NoDiff	38	-0.215728	NoDiff	173	-0.61782	NoDiff
Cluster_100754	5	10645333	10645764	24	Intergenic	-	0.743084	NoDiff	44	1.59263	NoDiff	24	1.58295	NoDiff	89	28.3643	NoDiff
Cluster_100755	5	10646419	10647815	24	Intergenic	-	2.05987	NoDiff	109	1.9608	NoDiff	114	1.68962	NoDiff	203	-1.36548	NoDiff
Cluster_100756	5	10648951	10650148	24	Intergenic	-	0.785336	NoDiff	52	2.01643	NoDiff	99	9.71162	NoDiff	281	-1.73948	NoDiff
Cluster_100758	5	10654509	10654956	24	Intergenic	-	0.936064	NoDiff	0	-1	NoDiff	0	-0.48137	NoDiff	0	-1	NoDiff
Cluster_100759	5	10655237	10656214	24	Intergenic	-	-0.555188	NoDiff	72	-18.2918	NoDiff	107	3.53346	NoDiff	199	2.59827	NoDiff
Cluster_10076	1	91860529	91861204	24	Intergenic	-	0.059745	NoDiff	61	-3.37373	NoDiff	45	-10.8615	NoDiff	133	0.706359	NoDiff
Cluster_100760	5	10679905	10680555	24	TE	-	1.42246	DHPE	40	0.692786	NoDiff	26	-1.48668	NoDiff	95	0.378996	NoDiff
Cluster_100762	5	10707974	10708105	24	TE	-	0.434052	NoDiff	14	10.2164	NoDiff	17	-1.25361	NoDiff	27	-0.577732	NoDiff
Cluster_100763	5	10709300	10710111	24	TE	-	1.09824	NoDiff	82	0.00123951	NIM	48	-0.109427	NIM	164	-0.388497	NIM
Cluster_100764	5	10711567	10712159	24	TE	-	0.233226	NoDiff	33	-0.14481	NoDiff	28	-0.031121	NoDiff	122	-0.502694	TCdM
Cluster_100766	5	10719012	10719817	24	3'-2k	Zm00001d013415	0.121177	AE	0	0.651217	NoDiff	0	0.802354	NoDiff	11	-0.121025	NIM
Cluster_100767	5	10720007	10720291	24	3'-2k	Zm00001d013415	0.986533	NoDiff	14	-0.635825	NoDiff	8	0.269205	NoDiff	68	1.61704	NoDiff
Cluster_100769	5	10721610	10722060	24	Intergenic	-	-0.574545	DLPE	0	0.719106	NoDiff	0	0.658872	NoDiff	0	0.334854	NoDiff
Cluster_100770	5	10724790	10725744	24	TE	-	-0.0428422	NoDiff	54	0.978149	NoDiff	35	0.197589	NoDiff	147	0.381337	NoDiff
Cluster_100771	5	10725843	10726136	24	TE	-	0.36344	NoDiff	8	0.598556	NoDiff	9	0.295776	NIM	61	-0.0700749	NIM
Cluster_100772	5	10741166	10741537	24	Intergenic	-	0.727665	DHPE	4	-0.379926	NIM	11	-67.9043	TCdM	56	1.44883	TCM
Cluster_100773	5	10742830	10743192	24	Intergenic	-	0.248618	AE	4	0.38198	NIM	5	0.301191	NIM	20	-0.28963	NIM
Cluster_100774	5	10761340	10762015	24	5'-2k	Zm00001d013416	0.154572	NoDiff	3	0.995224	NoDiff	8	0.143853	NoDiff	58	3.10935	NoDiff
Cluster_100776	5	10766231	10767896	24	3'-2k	Zm00001d013416	-0.118261	AE	84	1.20572	NoDiff	78	0.391756	NIM	370	-0.683226	TCdM
Cluster_100777	5	10767979	10768254	24	Intergenic	-	-0.728674	DLPE	24	0.244799	NoDiff	22	0.265143	NoDiff	57	-0.181689	NIM
Cluster_100778	5	10768376	10769619	24	Intergenic	-	-0.0321208	AE	93	0.778173	NoDiff	60	0.692899	TCM	290	-1.48703	NoDiff
Cluster_100779	5	10780181	10780404	24	Intergenic	-	-0.378627	NoDiff	32	0.0748104	NoDiff	21	0.148296	NoDiff	47	0.143462	NoDiff
Cluster_100780	5	10817307	10817720	24	5'-2k	Zm00001d013417	0.347521	NoDiff	0	0.99059	NoDiff	6	0.619368	TCM	13	0.216903	NIM
Cluster_100783	5	10824211	10825002	24	Gene body	Zm00001d013417	2.03075	NoDiff	71	0.186466	NoDiff	46	0.221919	NIM	127	-0.0787865	NoDiff
Cluster_100784	5	10831526	10831696	24	3'-2k	Zm00001d013418	-0.810701	DLPE	0	0.82507	NoDiff	0	-0.462766	NoDiff	0	-0.881534	NoDiff
Cluster_100786	5	10844101	10844924	24	TE	-	0.0590853	AE	0	0.442312	NoDiff	0	0.416066	NoDiff	0	0.382461	NoDiff
Cluster_100787	5	10845387	10845844	24	Intergenic	-	0.0529145	AE	0	0.553641	NoDiff	0	0.220766	NoDiff	1	-0.206642	NoDiff
Cluster_100789	5	10877776	10878097	24	Gene body	Zm00001d013419	-0.0131034	AE	0	0	NoDiff	0	0	NoDiff	0	0	NoDiff
Cluster_10079	1	91878332	91878771	24	TE	-	0.022341	NoDiff	40	-0.360776	NoDiff	31	-0.736697	NoDiff	76	2.95246	NoDiff
Cluster_100790	5	10900545	10900701	24	TE	-	-0.0366379	AE	0	0	NoDiff	0	0	NoDiff	0	0	NoDiff
Cluster_100792	5	10903786	10904422	24	TE	-	1.06276	NoDiff	0	1.15775	NoDiff	0	0.714337	NoDiff	9	-0.480023	NIM
Cluster_100798	5	10993550	10993816	24	Intergenic	-	-0.0587779	AE	5	0.00857633	NoDiff	1	-0.0461538	NoDiff	30	2.77314	NoDiff
Cluster_100799	5	11014412	11014813	24	Intergenic	-	-0.214987	AE	0	0	NoDiff	0	0	NoDiff	0	0	NoDiff
Cluster_10080	1	91902517	91902689	24	Intergenic	-	0.126175	AE	26	2.65194	NoDiff	11	0.82678	NoDiff	42	1.00285	NoDiff
Cluster_100801	5	11015637	11016151	24	5'-2k	Zm00001d013421	-0.441211	AE	20	0.118197	NoDiff	20	-0.426864	NoDiff	63	0.170492	NoDiff
Cluster_100804	5	11026566	11026891	24	3'-2k	Zm00001d013421	-0.462275	NoDiff	2	0	NoDiff	2	0	NoDiff	8	0	NoDiff
Cluster_100805	5	11027153	11027559	24	3'-2k	Zm00001d013421	3.30829	NoDiff	16	0.297592	NoDiff	12	7.59152	NoDiff	72	-2.31602	NoDiff
Cluster_100806	5	11028234	11028647	24	Intergenic	-	1.53107	NoDiff	31	0.566786	NoDiff	32	1.76161	NoDiff	108	0.220481	NoDiff
Cluster_100807	5	11029502	11030190	24	5'-2k	Zm00001d013422	-0.387541	AE	31	1.18827	NoDiff	32	0.219991	NIM	117	0.182139	NoDiff
Cluster_100808	5	11031939	11032521	24	3'-2k	Zm00001d013422	-0.147967	AE	0	1.03831	NoDiff	0	1.03603	NoDiff	0	1.01836	NoDiff
Cluster_100809	5	11033278	11033823	24	3'-2k	Zm00001d013422	0.216989	AE	0	1.01941	NoDiff	0	0.776861	NoDiff	0	0.24671	NoDiff
Cluster_100811	5	11048064	11048559	24	Intergenic	-	-0.63572	DLPE	0	0.315821	NoDiff	0	-0.452782	NoDiff	0	-0.751633	NoDiff
Cluster_100812	5	11049327	11050434	24	3'-2k	Zm00001d013423	-0.142443	AE	24	0.828257	NoDiff	22	0.706847	NoDiff	106	-0.3696	NoDiff
Cluster_100814	5	11121373	11122071	24	5'-2k	Zm00001d013424	0.0152331	NoDiff	26	0.369487	NoDiff	24	0.267813	NoDiff	186	-0.43226	NoDiff
Cluster_100815	5	11128272	11128858	24	Gene body	Zm00001d013426	-0.0401064	AE	35	1.57146	NoDiff	40	3.88911	NoDiff	159	-1.17701	NoDiff
Cluster_100816	5	11135217	11135778	24	5'-2k	Zm00001d013426	0.00659776	AE	44	0.667909	TCM	36	0.833069	TCM	133	0.359489	NIM
Cluster_100817	5	11135952	11136622	24	5'-2k	Zm00001d013426	0.949824	DHPE	23	0.880587	NoDiff	33	0.907681	NoDiff	136	-1.44138	NoDiff
Cluster_100818	5	11136801	11137269	24	5'-2k	Zm00001d013426	0.235186	NoDiff	14	9.39636	NoDiff	28	0.43794	NoDiff	128	-0.284257	NIM
Cluster_100820	5	11141770	11142545	24	Gene body	Zm00001d013427	0.199693	NoDiff	62	-0.204717	NoDiff	43	-1.15911	NoDiff	115	0.0869895	NoDiff
Cluster_100821	5	11142766	11144096	24	Gene body	Zm00001d013427	56.5278	NoDiff	85	0.167721	NoDiff	61	-0.818787	NoDiff	136	-1.87491	NoDiff
Cluster_100822	5	11144616	11145515	24	Gene body	Zm00001d013427	-5.5813	NoDiff	146	-0.407947	NoDiff	65	-0.723807	NoDiff	179	0.147902	NoDiff
Cluster_100825	5	11149402	11149723	24	5'-2k	Zm00001d013427	-0.81354	DLPE	16	-1.74265	NoDiff	10	0.616323	NoDiff	120	1.0524	NoDiff
Cluster_100827	5	11152519	11153416	24	Intergenic	-	0.685248	NoDiff	52	-5.03408	NoDiff	62	-1.75441	NoDiff	254	-0.306031	NoDiff
Cluster_100828	5	11191957	11192904	24	TE	-	-0.516823	NoDiff	40	0.727149	TCM	50	0.795803	TCM	284	-0.24118	NoDiff
Cluster_100829	5	11193232	11194145	24	3'-2k	Zm00001d013428	-0.176268	AE	86	0.28377	NoDiff	78	0.430451	NoDiff	244	-0.311852	NoDiff
Cluster_10083	1	91956637	91956894	24	Intergenic	-	-0.292464	AE	12	-0.601807	TCdM	14	-0.73466	TCdM	71	-0.374041	NIM
Cluster_100830	5	11194373	11194947	24	3'-2k	Zm00001d013428	0.544337	DHPE	52	0.892478	TCM	41	1.73955	NoDiff	137	-0.405067	NoDiff
Cluster_100833	5	11236879	11237445	24	Gene body	Zm00001d013430	0.274335	AE	60	1.56324	NoDiff	52	1.22352	NoDiff	72	-1.88459	NoDiff
Cluster_100835	5	11247698	11248007	24	Intergenic	-	0.927728	DHPE	0	-1	NoDiff	0	0.793472	NoDiff	0	0.294573	NoDiff
Cluster_100836	5	11249341	11249855	24	TE	-	-0.0338172	AE	32	-3.67845	NoDiff	17	-2.24937	NoDiff	48	1.39578	NoDiff
Cluster_100840	5	11268911	11269460	24	3'-2k	Zm00001d013431	-3.44282	NoDiff	0	1.06389	NoDiff	0	1.06386	NoDiff	0	-0.243634	NoDiff
Cluster_100844	5	11276624	11277342	24	5'-2k	Zm00001d013431	-0.374479	AE	37	-0.534893	NoDiff	18	0.916092	NoDiff	132	0.0708977	NIM
Cluster_100849	5	11305490	11307804	24	Gene body	Zm00001d013434	-0.246455	AE	75	-0.136898	NIM	98	-0.815411	TCdM	398	-0.424488	NoDiff
Cluster_10085	1	91972754	91973450	24	TE	-	-0.32862	AE	48	0.270395	NIM	46	0.19546	NIM	158	-0.345797	NIM
Cluster_100850	5	11312074	11312823	24	Gene body	Zm00001d013435	0.286752	NoDiff	58	12.5808	NoDiff	40	3.21811	NoDiff	97	-1.29849	NoDiff
Cluster_100851	5	11313783	11314647	24	Gene body	Zm00001d013435	0.90731	DHPE	110	-1.25727	NoDiff	52	-1.7321	NoDiff	192	-0.131289	NoDiff
Cluster_100852	5	11314790	11315412	24	Gene body	Zm00001d013435	-0.265289	NoDiff	44	0.544603	NoDiff	31	1.17455	TCM	94	0.788808	NoDiff
Cluster_100856	5	11320056	11320630	24	Gene body	Zm00001d013435	26.8524	NoDiff	0	0.957102	NoDiff	1	-1.09075	NoDiff	1	2.41904	NoDiff
Cluster_100860	5	11326333	11326866	24	Gene body	Zm00001d013435	7.6743	NoDiff	19	2.43891	NoDiff	30	1.4429	NoDiff	163	7.08348	NoDiff
Cluster_100863	5	11332676	11332963	24	3'-2k	Zm00001d013435	-0.398824	AE	0	0	NoDiff	0	0	NoDiff	0	0	NoDiff
Cluster_100865	5	11336691	11336719	24	Intergenic	-	-0.319341	AE	0	0	NoDiff	1	-1	NoDiff	1	0	NoDiff
Cluster_100866	5	11366304	11367060	24	TE	-	-0.543583	NoDiff	34	-0.339801	NoDiff	51	3.61938	NoDiff	231	3.55344	NoDiff
Cluster_100868	5	11383501	11384048	24	Gene body	Zm00001d013439	-2.25985	NoDiff	0	0	NoDiff	0	0	NoDiff	0	0	NoDiff
Cluster_100875	5	11405973	11406151	24	TE	-	-1	NoDiff	0	0.4	NoDiff	0	0.333333	NoDiff	0	0	NoDiff
Cluster_100877	5	11411732	11412243	24	3'-2k	Zm00001d013440	2.41066	NoDiff	21	2.2743	NoDiff	11	0.131864	NoDiff	116	0.703359	NoDiff
Cluster_100880	5	11418580	11419116	24	5'-2k	Zm00001d013441	-0.104726	NoDiff	20	-0.239969	NIM	17	0.359576	NIM	130	1.47767	NoDiff
Cluster_100881	5	11419233	11420241	24	5'-2k	Zm00001d013441	-0.551013	NoDiff	54	0.547002	NoDiff	35	0.736489	NoDiff	288	-0.0112722	NoDiff
Cluster_100882	5	11420697	11420806	24	TE	-	4.5138	NoDiff	14	-0.415543	NoDiff	23	3.51723	NoDiff	31	3.25595	NoDiff
Cluster_100883	5	11680602	11681509	24	5'-2k	Zm00001d013442	-1.10009	NoDiff	78	1.93385	NoDiff	50	7.43019	NoDiff	166	0.0636601	NIM
Cluster_100884	5	11692819	11693222	24	Gene body	Zm00001d013442	-1.01056	NoDiff	20	-2.14973	NoDiff	22	0.695523	NoDiff	100	-11.7046	NoDiff
Cluster_100885	5	11695049	11695961	24	Gene body	Zm00001d013442	1.72335	NoDiff	47	4.39682	NoDiff	50	0.403321	NIM	279	1.91323	NoDiff
Cluster_100887	5	11699156	11699496	24	Gene body	Zm00001d013442	8.84095	NoDiff	16	-2.26799	NoDiff	44	0.475428	NIM	86	0	NoDiff
Cluster_100888	5	11699659	11700966	24	Gene body	Zm00001d013442	-1.04181	NoDiff	44	0.867207	NoDiff	52	1.04023	NoDiff	256	-0.32395	NoDiff
Cluster_100891	5	11709436	11710764	24	3'-2k	Zm00001d013443	-0.800083	NoDiff	99	0.44491	NoDiff	65	2.40965	NoDiff	315	-0.389407	NIM
Cluster_100892	5	11712993	11714069	24	5'-2k	Zm00001d013443	0.0969977	NoDiff	42	0.518226	NoDiff	36	0.763138	NoDiff	268	4.54365	NoDiff
Cluster_100894	5	11716501	11717020	24	Intergenic	-	-1.07206	NoDiff	80	1.16447	NoDiff	42	1.64142	NoDiff	135	0.171404	NoDiff
Cluster_100895	5	11735913	11736525	24	3'-2k	Zm00001d013444	12.5652	NoDiff	34	0.155447	NoDiff	37	0.826232	NoDiff	103	3.5327	NoDiff
Cluster_100897	5	11741810	11742452	24	Gene body	Zm00001d013444	-0.302146	AE	38	-27.6103	NoDiff	51	0.341793	NoDiff	184	-0.731801	NoDiff
Cluster_100899	5	11749119	11749719	24	5'-2k	Zm00001d013445	-0.927434	DLPE	8	0.332413	NoDiff	9	-0.0949993	NoDiff	47	0.216933	NoDiff
Cluster_10090	1	91989620	91990479	24	5'-2k	Zm00001d029884	-0.343934	AE	36	0.304545	NoDiff	43	-0.02024	NIM	207	-0.0087085	NoDiff
Cluster_100900	5	11751759	11752889	24	Gene body	Zm00001d013445	-0.82221	DLPE	56	-0.270967	NoDiff	52	0.672872	NoDiff	156	0.290979	NoDiff
Cluster_100904	5	11779336	11780607	24	TE	-	136.014	NoDiff	88	2.09375	NoDiff	59	0.639543	TCM	101	-3.40017	NoDiff
Cluster_100905	5	11810103	11810978	24	5'-2k	Zm00001d013446	-0.0181773	NoDiff	110	-0.524762	NoDiff	54	-0.097197	NoDiff	204	-2.76208	NoDiff
Cluster_100907	5	11813207	11813383	24	3'-2k	Zm00001d013446	0.0926461	NoDiff	0	-1	NoDiff	0	-1	NoDiff	0	-1	NoDiff
Cluster_100908	5	11830756	11831128	24	3'-2k	Zm00001d013447	-0.0995206	AE	0	0	NoDiff	0	0	NoDiff	0	0	NoDiff
Cluster_100909	5	11838775	11839050	24	5'-2k	Zm00001d013449	2.2663	NoDiff	16	0.839953	TCM	11	0.93857	TCM	70	0.713206	TCM
Cluster_10091	1	91991666	91992918	24	3'-2k	Zm00001d029884	1.6118	NoDiff	63	1.47736	NoDiff	91	0.925945	NoDiff	282	0.218543	NIM
Cluster_100910	5	11839239	11839451	24	5'-2k	Zm00001d013449	-26.326	NoDiff	35	0.408296	NoDiff	27	1.72896	NoDiff	49	-0.298422	NoDiff
Cluster_100911	5	11839573	11839882	24	5'-2k	Zm00001d013449	0.210653	NoDiff	41	0.797163	NoDiff	31	3.64395	NoDiff	72	-0.628719	NoDiff
Cluster_100912	5	11839962	11840392	24	5'-2k	Zm00001d013449	9.68953	NoDiff	28	0.361046	NoDiff	11	0.00907168	NoDiff	109	2.58285	NoDiff
Cluster_100913	5	11840914	11841467	24	Intergenic	-	0.00825565	AE	24	-1.10007	NoDiff	17	23.5593	NoDiff	134	0.249013	NoDiff
Cluster_100915	5	11869757	11869913	24	5'-2k	Zm00001d013450	2.11974	NoDiff	7	1.10346	NoDiff	13	1.95514	NoDiff	44	-1.54252	NoDiff
Cluster_100917	5	11882784	11883377	24	TE	-	4.09609	NoDiff	27	-0.616419	NoDiff	13	-0.254537	NoDiff	181	-2.05409	NoDiff
Cluster_10092	1	91994016	91994865	24	Intergenic	-	0.00450122	AE	20	-0.298053	NoDiff	19	-0.0940993	NoDiff	88	1.75522	NoDiff
Cluster_100922	5	11918727	11919072	24	TE	-	-1.74067	NoDiff	35	2.90079	NoDiff	27	-1.78057	NoDiff	41	-18.1287	NoDiff
Cluster_100923	5	11925654	11925868	24	TE	-	0.504954	NoDiff	13	3.8862	NoDiff	14	5.33862	NoDiff	18	-0.31708	NoDiff
Cluster_100924	5	11952742	11953485	24	5'-2k	Zm00001d013451	1.23335	NoDiff	49	-1.61621	NoDiff	41	0.474093	NoDiff	192	0.936257	NoDiff
Cluster_100925	5	11956303	11956549	24	Gene body	Zm00001d013451	-0.459611	NoDiff	26	-1.86148	NoDiff	31	-0.756455	NoDiff	67	-1.45354	NoDiff
Cluster_100927	5	11958975	11959254	24	5'-2k	Zm00001d013452	0.0301347	AE	0	-0.51811	NoDiff	0	0.500468	NoDiff	0	0.940801	NoDiff
Cluster_100928	5	11964145	11964321	24	3'-2k	Zm00001d013452	0.120229	AE	0	0	NoDiff	0	2.26316	NoDiff	0	-0.00793899	NoDiff
Cluster_100929	5	11965420	11965845	24	5'-2k	Zm00001d013453	0.39393	NoDiff	0	0.892514	NoDiff	0	0.771167	NoDiff	0	0.69428	NoDiff
Cluster_10093	1	92003628	92003963	24	Intergenic	-	-0.161565	AE	30	-1.05909	NoDiff	23	-0.715215	NoDiff	85	-45.3651	NoDiff
Cluster_100935	5	12104378	12104445	24	Intergenic	-	0.244692	AE	0	0	NoDiff	0	0	NoDiff	0	0	NoDiff
Cluster_100936	5	12107001	12107467	24	5'-2k	Zm00001d013459	-0.319289	AE	0	0	NoDiff	0	0	NoDiff	0	0	NoDiff
Cluster_100937	5	12113940	12114384	24	5'-2k	Zm00001d013463	-0.0423873	AE	2	0.849635	NoDiff	4	0.663354	NoDiff	14	0.328779	NoDiff
Cluster_100938	5	12116904	12117976	24	Gene body	Zm00001d013463	-0.560942	DLPE	81	-1.72242	NoDiff	40	-0.0110299	NIM	136	-0.303811	NoDiff
Cluster_100939	5	12118717	12119348	24	Gene body	Zm00001d013463	0.223393	AE	0	0.953241	NoDiff	0	0.473847	NoDiff	0	0.333518	NoDiff
Cluster_100942	5	12124466	12124775	24	Gene body	Zm00001d013463	-0.693508	DLPE	0	1.05217	NoDiff	0	1.02181	NoDiff	0	2.683	NoDiff
Cluster_100946	5	12182623	12182867	24	Intergenic	-	-0.554782	DLPE	0	1.58304	NoDiff	0	1.29766	NoDiff	0	2.75255	NoDiff
Cluster_100947	5	12190130	12190413	24	TE	-	-0.320993	NoDiff	0	0	NoDiff	0	0	NoDiff	0	0	NoDiff
Cluster_100948	5	12191068	12191656	24	TE	-	0.0111912	AE	0	0.710483	NoDiff	0	0.886363	NoDiff	0	1.04121	NoDiff
Cluster_10095	1	92004957	92005487	24	Intergenic	-	-0.290426	NoDiff	14	-2.79315	NoDiff	11	-0.588952	NoDiff	150	-0.57045	TCdM
Cluster_100950	5	12222100	12222594	24	Intergenic	-	-0.203328	AE	6	-1.27041	NoDiff	1	-0.878133	NoDiff	6	-0.467128	NIM
Cluster_100951	5	12223583	12224401	24	Intergenic	-	1.98155	DHPE	23	1.32897	TCM	9	1.61528	TCM	7	-0.828361	NoDiff
Cluster_100952	5	12224502	12225769	24	Intergenic	-	-0.888846	DLPE	45	-0.0608233	NoDiff	81	0.568868	TCM	292	-0.0202445	NoDiff
Cluster_100953	5	12226141	12226395	24	Intergenic	-	0.140177	AE	0	1.35757	NoDiff	0	1.4977	NoDiff	0	0.723608	NoDiff
Cluster_100956	5	12242013	12242282	24	Intergenic	-	0.0646474	AE	18	-0.00838777	NoDiff	16	0.0341466	NIM	76	-0.458165	NIM
Cluster_100957	5	12242469	12243219	24	Intergenic	-	1.75273	DHPE	22	10.0858	NoDiff	29	1.47771	TCM	201	-1.38485	NoDiff
Cluster_100958	5	12246080	12246506	24	Intergenic	-	0.0735839	AE	21	1.8295	NoDiff	16	1.09202	TCM	90	0.618417	NoDiff
Cluster_100959	5	12246656	12247788	24	Intergenic	-	0.982605	DHPE	94	0.703276	NoDiff	59	0.937972	NoDiff	225	25.2551	NoDiff
Cluster_10096	1	92006422	92006613	24	TE	-	0.255958	NoDiff	12	2.61232	NoDiff	13	1.01391	NoDiff	35	-1.48165	NoDiff
Cluster_100960	5	12261130	12262314	24	Intergenic	-	-0.0105549	AE	139	0.198302	NIM	75	0.626533	TCM	354	0.601717	NoDiff
Cluster_100961	5	12262518	12262824	24	5'-2k	Zm00001d013466	0.492837	AE	20	1.04093	NoDiff	19	1.81256	NoDiff	72	11.7313	TCM
Cluster_100962	5	12262913	12263276	24	5'-2k	Zm00001d013466	0.0775138	NoDiff	16	0.902303	NoDiff	15	1.2802	NoDiff	95	0.877018	NoDiff
Cluster_100963	5	12263456	12263580	24	5'-2k	Zm00001d013466	-0.375602	AE	4	1.06781	NoDiff	5	0.996335	NoDiff	37	1.3657	NoDiff
Cluster_100964	5	12263869	12264310	24	5'-2k	Zm00001d013466	2.93051	NoDiff	20	0.92995	NoDiff	18	0.825992	NoDiff	115	5.59075	TCM
Cluster_100967	5	12274202	12275414	24	3'-2k	Zm00001d013466	2.2747	NoDiff	66	0.0733014	NoDiff	77	0.0673312	NIM	394	0.61111	NoDiff
Cluster_100968	5	12275502	12276616	24	Intergenic	-	-0.259376	NoDiff	86	-1.06401	NoDiff	62	0.175716	NoDiff	268	-0.482779	NoDiff
Cluster_100969	5	12277296	12278736	24	Intergenic	-	0.315658	AE	87	-0.882503	NoDiff	64	0.127585	NoDiff	382	-2.70328	NoDiff
Cluster_10097	1	92006748	92007123	24	Intergenic	-	-0.253334	NoDiff	12	87.9886	NoDiff	8	3.36764	NoDiff	95	0.0330427	NIM
Cluster_100970	5	12279114	12279561	24	Intergenic	-	-5.11398	NoDiff	14	1.95034	NoDiff	16	0.609939	NoDiff	119	-0.663952	TCdM
Cluster_100971	5	12280291	12280522	24	TE	-	0.135214	AE	20	0.965224	TCM	21	1.11105	NoDiff	67	-1.31027	NoDiff
Cluster_100972	5	12280781	12281757	24	TE	-	-0.402823	AE	65	2.68553	NoDiff	36	1.18969	TCM	61	-5.10407	NoDiff
Cluster_100973	5	12281973	12282413	24	TE	-	0.013237	NoDiff	10	0.337724	NoDiff	15	0.254211	NoDiff	145	-0.458364	NIM
Cluster_100975	5	12291525	12293086	24	3'-2k	Zm00001d013467	-0.451387	NoDiff	77	2.39182	NoDiff	94	3.01288	NoDiff	259	-0.88211	NoDiff
Cluster_100977	5	12304429	12304670	24	Intergenic	-	-0.155185	AE	26	0.836518	NoDiff	9	0.151633	NIM	62	2.07932	NoDiff
Cluster_100979	5	12318958	12319456	24	TE	-	-0.0396356	AE	25	-57.2681	NoDiff	38	-7.1642	NoDiff	142	1.12668	NoDiff
Cluster_10098	1	92007477	92008838	24	Intergenic	-	1.29549	DHPE	77	-0.441094	NIM	62	-0.149493	NIM	356	0.140298	NoDiff
Cluster_100980	5	12320059	12320498	24	Intergenic	-	-0.723279	NoDiff	12	-1.81152	NoDiff	18	0.520848	NoDiff	121	0.146316	NIM
Cluster_100981	5	12320995	12321660	24	Intergenic	-	-0.973294	NoDiff	41	0.664191	NoDiff	30	0.557573	NoDiff	135	-3.69558	NoDiff
Cluster_100982	5	12321744	12322245	24	Intergenic	-	-0.261196	NoDiff	28	1.66243	NoDiff	18	2.40319	NoDiff	124	-2.72987	NoDiff
Cluster_100983	5	12322895	12323788	24	Other	-	5.01267	NoDiff	75	2.63455	NoDiff	75	0.812137	NoDiff	198	-0.0225994	NoDiff
Cluster_100984	5	12325051	12325652	24	3'-2k	Zm00001d013468	0.164958	NoDiff	22	0.828445	NoDiff	26	1.81698	NoDiff	170	-0.907179	TCdM
Cluster_100985	5	12326968	12327639	24	3'-2k	Zm00001d013468	0.72192	DHPE	41	0.127132	NoDiff	56	-0.0330185	NoDiff	162	-0.0168553	NIM
Cluster_100986	5	12330109	12331566	24	5'-2k	Zm00001d013468	-0.0535601	AE	96	0.726821	NoDiff	79	-1.24819	NoDiff	354	0.659509	NoDiff
Cluster_100987	5	12333473	12333942	24	Intergenic	-	0.130353	AE	18	1.10751	NoDiff	5	1.87894	NoDiff	122	0.979543	TCM
Cluster_100989	5	12335285	12335988	24	Intergenic	-	0.799872	DHPE	57	2.20847	NoDiff	57	2.05009	NoDiff	136	1.39772	NoDiff
Cluster_10099	1	92019862	92020367	24	TE	-	-0.148083	AE	48	0.30091	NoDiff	47	0.379936	NIM	106	-0.20518	NIM
Cluster_100991	5	12336929	12337905	24	TE	-	0.486004	AE	64	0.907872	NoDiff	36	1.16423	NoDiff	200	0.982405	NoDiff
Cluster_100993	5	12343173	12343601	24	Intergenic	-	3.87601	NoDiff	32	-27.7267	NoDiff	30	1.16441	NoDiff	66	0.773693	NoDiff
Cluster_100994	5	12344043	12344456	24	Intergenic	-	-0.117281	NoDiff	16	-0.995081	NoDiff	27	0.696031	NoDiff	106	0.0184824	NoDiff
Cluster_100995	5	12345328	12345955	24	Intergenic	-	2.16033	NoDiff	37	0.717854	NoDiff	30	0.923638	TCM	155	-0.0686358	NIM
Cluster_100996	5	12346127	12347246	24	Intergenic	-	-0.354864	AE	86	0.15057	NoDiff	50	1.96835	NoDiff	280	1.52182	NoDiff
Cluster_100997	5	12347609	12349284	24	5'-2k	Zm00001d013469	0.344997	NoDiff	77	-1.65778	NoDiff	49	0.506516	TCM	502	-1.34722	NoDiff
Cluster_1010	1	7545952	7546282	24	Intergenic	-	0.51739	DHPE	0	0	NoDiff	0	0	NoDiff	0	0	NoDiff
Cluster_101000	5	12372926	12374521	24	Gene body	Zm00001d013470	0.446615	AE	80	0.675557	NoDiff	73	2.27198	NoDiff	473	-0.582366	NoDiff
Cluster_101001	5	12392407	12394745	24	5'-2k	Zm00001d013470	-0.115119	AE	118	-1.07618	NoDiff	84	0.589462	TCM	414	-0.0934044	NoDiff
Cluster_101006	5	12428612	12428733	24	Gene body	Zm00001d013476	1.91263	NoDiff	0	0	NoDiff	0	0	NoDiff	0	0	NoDiff
Cluster_101007	5	12432125	12432522	24	5'-2k	Zm00001d013476	0.987358	DHPE	0	0	NoDiff	0	0	NoDiff	0	0	NoDiff
Cluster_101008	5	12433363	12434083	24	Intergenic	-	0.334408	AE	8	1.88036	NoDiff	19	-0.979399	NoDiff	51	-2.23572	NoDiff
Cluster_101009	5	12463151	12463647	24	Intergenic	-	-1.19674	NoDiff	32	-3.81655	NoDiff	12	0.592644	TCM	26	3.53772	NoDiff
Cluster_10101	1	92054143	92054919	24	Intergenic	-	0.629179	NoDiff	66	19.7262	NoDiff	47	3.93422	NoDiff	202	-0.552776	TCdM
Cluster_101010	5	12474485	12475380	24	TE	-	0.0875531	AE	4	0.698678	TCM	1	0.848187	NoDiff	10	-0.343597	NIM
Cluster_101011	5	12476479	12476735	24	5'-2k	Zm00001d013477	0.00552626	AE	7	1.14179	NoDiff	11	0.0993616	NIM	34	8.21118	NoDiff
Cluster_101014	5	12546191	12546745	24	TE	-	-0.248368	AE	16	4.01331	NoDiff	7	1.76153	NoDiff	20	-2.96143	NoDiff
Cluster_101016	5	12629124	12629352	24	Intergenic	-	0.56013	NoDiff	3	-1	NoDiff	2	-1	NoDiff	12	-1	NoDiff
Cluster_101018	5	12631178	12631719	24	Intergenic	-	0.941145	DHPE	44	1.07768	NoDiff	45	1.0146	NoDiff	138	1.23688	NoDiff
Cluster_10102	1	92055102	92055646	24	Intergenic	-	0.0297569	AE	35	1.04669	NoDiff	28	1.16319	NoDiff	39	-0.524678	NoDiff
Cluster_101020	5	12639850	12640020	24	5'-2k	Zm00001d013485	-0.3589	AE	0	0	NoDiff	0	0	NoDiff	0	0	NoDiff
Cluster_101024	5	12653715	12654060	24	3'-2k	Zm00001d013488	3.56926	NoDiff	0	0	NoDiff	0	0	NoDiff	0	0	NoDiff
Cluster_101027	5	12706272	12706477	24	5'-2k	Zm00001d013493	-0.611513	DLPE	24	0.472246	NoDiff	10	0.894236	NoDiff	25	-0.12006	NoDiff
Cluster_101029	5	12710034	12710890	24	Intergenic	-	0.49422	NoDiff	54	-37.8341	NoDiff	58	-0.752787	NoDiff	236	0.621112	NoDiff
Cluster_101030	5	12712253	12713070	24	Intergenic	-	-0.348564	AE	26	0.945125	NoDiff	67	1.01589	NoDiff	250	0.622496	NoDiff
Cluster_101032	5	12715952	12716220	24	Intergenic	-	0.236469	NoDiff	20	1.35949	NoDiff	17	1.69791	NoDiff	52	0.793133	NoDiff
Cluster_101034	5	12716836	12717161	24	3'-2k	Zm00001d013494	0.512644	DHPE	8	1.29711	NoDiff	14	1.02791	NoDiff	102	0.268443	NoDiff
Cluster_101036	5	12719822	12720572	24	5'-2k	Zm00001d013494	3.36964	NoDiff	101	0.0933588	NoDiff	77	0.184507	NoDiff	190	-0.3162	NoDiff
Cluster_101038	5	12770270	12770618	24	3'-2k	Zm00001d013495	-0.732694	DLPE	26	1.05104	NoDiff	10	1.20898	NoDiff	30	0.582288	NoDiff
Cluster_101039	5	12770942	12771085	24	3'-2k	Zm00001d013495	0.449099	NoDiff	2	0.858683	NoDiff	5	3.04468	NoDiff	33	1.07951	TCM
Cluster_101040	5	12774984	12775558	24	5'-2k	Zm00001d013495	0.342423	NoDiff	12	1.26166	NoDiff	10	1.38357	NoDiff	20	1.66412	NoDiff
Cluster_101043	5	12779629	12779827	24	5'-2k	Zm00001d013496	0.21164	AE	24	0.864255	NoDiff	12	0.765136	NoDiff	45	5.40516	NoDiff
Cluster_101045	5	12796073	12796511	24	Intergenic	-	1.84282	NoDiff	19	-1.10245	NoDiff	18	0.94678	NoDiff	82	-0.762508	TCdM
Cluster_101046	5	12803776	12804068	24	3'-2k	Zm00001d013498	5.09161	NoDiff	22	-4.03556	NoDiff	34	-6.19865	NoDiff	72	-0.834425	NoDiff
Cluster_101047	5	12807998	12808118	24	5'-2k	Zm00001d013498	0.216251	AE	0	3.33333	NoDiff	1	0.144781	NoDiff	14	2.7354	NoDiff
Cluster_101049	5	12829680	12829872	24	TE	-	-0.180345	AE	2	1.10547	NoDiff	8	1.16466	NoDiff	58	-1	NoDiff
Cluster_10105	1	92071704	92071968	24	Intergenic	-	-0.149447	NoDiff	0	-0.231338	NoDiff	0	-0.176672	NoDiff	0	0	NoDiff
Cluster_101051	5	12898573	12899048	24	Intergenic	-	-0.236826	AE	10	-0.514033	NoDiff	9	-0.24201	NoDiff	147	8.60195	NoDiff
Cluster_101052	5	12900800	12901260	24	5'-2k	Zm00001d013499	-0.172513	AE	28	0.41244	NIM	21	0.771381	TCM	122	1.94606	NoDiff
Cluster_101054	5	12902572	12903054	24	5'-2k	Zm00001d013499	0.18914	NoDiff	10	0.984497	NoDiff	18	1.10956	NoDiff	94	0.661484	TCM
Cluster_101055	5	12910928	12911369	24	3'-2k	Zm00001d013500	0.569469	DHPE	59	1.02819	NoDiff	25	1.01364	NoDiff	97	0.760318	NoDiff
Cluster_101057	5	12913782	12914138	24	5'-2k	Zm00001d013500	-0.0452394	AE	2	0.616915	NoDiff	2	0.0660938	NoDiff	1	0.315216	NoDiff
Cluster_101059	5	12928934	12929079	24	5'-2k	Zm00001d013501	0.118774	AE	0	12.3502	NoDiff	0	7.79012	TCM	0	-1.61935	TCdM
Cluster_10106	1	92102105	92102264	24	Intergenic	-	0.290195	NoDiff	0	0	NoDiff	0	0	NoDiff	0	0	NoDiff
Cluster_101061	5	12930945	12932234	24	3'-2k	Zm00001d013502	-0.158323	AE	82	-3.11501	NoDiff	52	0.177098	NoDiff	191	-0.0423978	NoDiff
Cluster_101063	5	12936406	12936983	24	3'-2k	Zm00001d013503	44.8167	NoDiff	8	0.819188	NoDiff	15	1.43325	NoDiff	132	-0.440328	NIM
Cluster_101064	5	12937167	12937620	24	3'-2k	Zm00001d013503	0.0251176	AE	31	1.49961	NoDiff	37	-0.0164553	NIM	119	0.2445	NIM
Cluster_101066	5	12941501	12942226	24	5'-2k	Zm00001d013504	0.737515	DHPE	60	-10.1396	NoDiff	52	-0.693743	NoDiff	192	-2.16655	NoDiff
Cluster_101067	5	12942960	12943795	24	5'-2k	Zm00001d013505	0.208629	AE	50	0.95503	NoDiff	43	0.992652	NoDiff	213	0.908369	NoDiff
Cluster_101068	5	12947544	12948361	24	3'-2k	Zm00001d013506	0.309489	AE	103	1.23936	NoDiff	77	1.60536	NoDiff	96	1.85228	NoDiff
Cluster_101069	5	12956071	12957083	24	5'-2k	Zm00001d013506	-0.594054	DLPE	21	0.719485	TCM	8	0.731169	TCM	46	-0.584899	NoDiff
Cluster_10107	1	92210011	92210286	24	Intergenic	-	0.524513	DHPE	24	0.664521	TCM	21	0.539966	NoDiff	38	2.99065	NoDiff
Cluster_101070	5	12957932	12958769	24	3'-2k	Zm00001d013507	-0.107879	AE	18	0.989059	NoDiff	22	-0.117404	NoDiff	118	-0.156962	NIM
Cluster_101072	5	12966608	12966836	24	5'-2k	Zm00001d013507	-0.357843	NoDiff	14	0.364262	NoDiff	8	-50.6303	NoDiff	52	-0.611559	NoDiff
Cluster_101073	5	12967803	12968221	24	3'-2k	Zm00001d013508	-0.765009	NoDiff	12	0.252716	NoDiff	0	0.82896	NoDiff	1	3.17332	NoDiff
Cluster_101074	5	12969747	12969912	24	TE	-	5.08882	NoDiff	9	1.76875	NoDiff	6	0.430462	NIM	29	-0.576669	NoDiff
Cluster_101075	5	12990165	12990448	24	Intergenic	-	-0.108129	AE	18	0.277938	NoDiff	14	0.416714	NoDiff	48	-0.385787	NoDiff
Cluster_101076	5	13015381	13015569	24	TE	-	-0.17184	AE	2	-73.8019	NoDiff	3	27.403	NoDiff	4	-2.44344	NoDiff
Cluster_10108	1	92210371	92210855	24	Intergenic	-	0.0368743	AE	6	0.784825	NoDiff	19	-0.137607	NoDiff	46	-1	NoDiff
Cluster_101080	5	13053405	13053721	24	Intergenic	-	-1.12566	NoDiff	0	0	NoDiff	0	0	NoDiff	0	0	NoDiff
Cluster_101081	5	13075575	13075739	24	Gene body	Zm00001d013510	0.127747	AE	13	-0.460794	NoDiff	17	-1.627	NoDiff	26	-0.640184	NoDiff
Cluster_101082	5	13096036	13096098	24	Intergenic	-	0.227209	AE	1	0.885062	NoDiff	0	1.28571	NoDiff	0	-0.827743	NoDiff
Cluster_101085	5	13284316	13284834	24	Intergenic	-	0.563977	DHPE	45	0.987552	NoDiff	22	1.17746	NoDiff	85	-0.916096	NoDiff
Cluster_101087	5	13307701	13308441	24	3'-2k	Zm00001d013512	2.27504	NoDiff	21	-0.961394	NoDiff	12	-8.38118	NoDiff	97	-0.839805	NoDiff
Cluster_101088	5	13343263	13343689	24	Intergenic	-	23.888	NoDiff	28	1.00842	NoDiff	8	1.11962	NoDiff	13	-0.706897	NoDiff
Cluster_101089	5	13346770	13347415	24	Intergenic	-	-0.789861	NoDiff	28	0.0759239	NoDiff	23	2.07137	NoDiff	96	1.2397	NoDiff
Cluster_10109	1	92210932	92211524	24	Intergenic	-	-0.164918	NoDiff	15	5.28123	NoDiff	43	1.33348	NoDiff	137	-1.71554	NoDiff
Cluster_101090	5	13357718	13358421	24	Intergenic	-	1.31991	NoDiff	18	-0.388186	NoDiff	7	-2.83115	NoDiff	27	0.119066	NoDiff
Cluster_101092	5	13359860	13360187	24	Intergenic	-	-8.17926	TLPE	49	-0.803644	NoDiff	27	-4.44344	NoDiff	56	5.47116	NoDiff
Cluster_101094	5	13371285	13371771	24	Intergenic	-	-0.0776977	AE	54	-2.27146	NoDiff	44	0.0810702	NoDiff	136	-1.26924	NoDiff
Cluster_101096	5	13376308	13376972	24	Intergenic	-	-0.132718	AE	66	0.112965	NoDiff	51	0.53567	NoDiff	165	-0.197335	NoDiff
Cluster_101097	5	13379021	13379460	24	Intergenic	-	-2.79108	NoDiff	32	-2.33294	NoDiff	28	-0.264868	NoDiff	120	-2.73973	NoDiff
Cluster_10110	1	92211673	92212221	24	Intergenic	-	0.999509	NoDiff	39	2.94938	NoDiff	75	0.242394	NoDiff	153	0.215041	NoDiff
Cluster_101101	5	13404606	13405617	24	TE	-	1.66411	NoDiff	74	0.114413	NoDiff	49	1.56444	NoDiff	301	1.1029	NoDiff
Cluster_101104	5	13410238	13410882	24	5'-2k	Zm00001d013516	-0.0186529	AE	30	-0.035441	NIM	52	-0.164532	NIM	184	-0.481011	NIM
Cluster_101105	5	13411684	13412272	24	Gene body	Zm00001d013516	-0.335638	AE	28	-1.63238	NoDiff	30	-0.724878	NoDiff	158	-0.88914	TCdM
Cluster_101106	5	13412808	13413073	24	3'-2k	Zm00001d013516	1.59739	DHPE	8	1.31955	NoDiff	3	3.51063	NoDiff	73	1.64952	NoDiff
Cluster_101107	5	13414809	13415237	24	5'-2k	Zm00001d013517	3.16997	NoDiff	16	0.54789	NoDiff	11	0.457142	NoDiff	65	0.71244	NoDiff
Cluster_101109	5	13420708	13421309	24	TE	-	-0.276039	NoDiff	26	0.720209	NoDiff	20	0.233754	NIM	150	1.99268	NoDiff
Cluster_10111	1	92216300	92216621	24	5'-2k	Zm00001d029885	0.475354	AE	0	-1	NoDiff	1	-6.93388	NoDiff	7	-5.47059	NoDiff
Cluster_101110	5	13435082	13435345	24	Intergenic	-	-0.158996	NoDiff	1	-47.8822	NoDiff	0	0.774242	NoDiff	2	3.32639	NoDiff
Cluster_101112	5	13443166	13443806	24	Gene body	Zm00001d013519	0.668135	NoDiff	37	0.873686	NoDiff	31	0.838507	NoDiff	188	0.750821	TCM
Cluster_101113	5	13443930	13444664	24	Gene body	Zm00001d013519	1.28089	NoDiff	18	-0.943708	NoDiff	17	-1.36459	NoDiff	181	-2.72552	NoDiff
Cluster_101114	5	13445396	13445513	24	Gene body	Zm00001d013519	-0.338813	AE	0	0	NoDiff	0	0	NoDiff	0	0	NoDiff
Cluster_101115	5	13446121	13447006	24	3'-2k	Zm00001d013519	-0.120217	AE	71	0.728382	NoDiff	36	1.37974	NoDiff	220	-116.596	NoDiff
Cluster_101116	5	13447974	13448167	24	3'-2k	Zm00001d013519	-0.126096	AE	1	-0.223387	NoDiff	0	0.585669	NoDiff	0	0.0588086	NoDiff
Cluster_101118	5	13448727	13450239	24	Intergenic	-	0.132103	AE	27	0.561382	NoDiff	26	0.744013	NoDiff	136	-1.64804	NoDiff
Cluster_101123	5	13510961	13511371	24	Intergenic	-	0.288538	NoDiff	5	-0.511501	NoDiff	7	0.629919	NoDiff	27	-0.121731	NoDiff
Cluster_101124	5	13511758	13512507	24	5'-2k	Zm00001d013520	1.09173	DHPE	7	7.15107	TCM	10	2.76307	NoDiff	34	1.06695	TCM
Cluster_101125	5	13516621	13517365	24	3'-2k	Zm00001d013521	-0.243789	AE	0	0.843648	NoDiff	0	0.868161	NoDiff	0	0.412059	NoDiff
Cluster_101126	5	13517540	13517773	24	3'-2k	Zm00001d013521	-0.647852	DLPE	0	0.838727	NoDiff	0	0.343864	NoDiff	0	-0.511704	NoDiff
Cluster_101127	5	13522115	13522913	24	5'-2k	Zm00001d013521	0.138064	NoDiff	73	-0.288781	NoDiff	45	0.0848618	NoDiff	177	1.46381	NoDiff
Cluster_101128	5	13525166	13526546	24	Intergenic	-	-1.72482	NoDiff	79	-1.13753	NoDiff	72	-0.602811	NoDiff	266	0.942772	NoDiff
Cluster_101129	5	13527511	13528272	24	Intergenic	-	-0.0286137	AE	0	0.924791	NoDiff	0	0.900512	NoDiff	0	0.369639	NoDiff
Cluster_101130	5	13532617	13534057	24	Intergenic	-	-0.0648011	NoDiff	87	0.451557	NoDiff	54	0.510443	NoDiff	420	-1.4212	NoDiff
Cluster_101131	5	13535518	13535736	24	5'-2k	Zm00001d013522	-0.385398	NoDiff	0	0	NoDiff	0	0	NoDiff	0	0	NoDiff
Cluster_101132	5	13537125	13537268	24	Gene body	Zm00001d013522	-0.65222	DLPE	0	0	NoDiff	0	0	NoDiff	0	0	NoDiff
Cluster_101133	5	13538223	13538428	24	Gene body	Zm00001d013522	-0.449701	AE	5	-4.06904	NoDiff	3	0.396655	NoDiff	7	0.693566	TCM
Cluster_101134	5	13539739	13540214	24	3'-2k	Zm00001d013522	-0.197182	AE	3	-0.167362	NoDiff	7	0.363142	NoDiff	12	0.223744	NoDiff
Cluster_101135	5	13540598	13540930	24	3'-2k	Zm00001d013522	-0.135362	AE	0	0.972785	NoDiff	3	0.529705	NoDiff	17	0.314245	NIM
Cluster_101137	5	13550296	13550796	24	5'-2k	Zm00001d013523	1.33092	NoDiff	17	1.35576	NoDiff	31	0.527875	NoDiff	105	-1.74963	NoDiff
Cluster_101138	5	13550874	13551272	24	5'-2k	Zm00001d013523	4.11242	THPE	14	-1.34647	NoDiff	13	-0.0601789	NIM	67	-0.252863	NoDiff
Cluster_10114	1	92224492	92224828	24	5'-2k	Zm00001d029886	0.22134	NoDiff	10	0.274505	NoDiff	21	1.31132	NoDiff	91	1.63907	NoDiff
Cluster_101141	5	13589217	13589872	24	5'-2k	Zm00001d013524	-0.257025	AE	21	-0.168637	NIM	9	0.0794067	NIM	95	0.20864	NIM
Cluster_101144	5	13607420	13608278	24	5'-2k	Zm00001d013525	1.87833	DHPE	7	0.729522	NoDiff	6	0.352354	NoDiff	57	-0.00741954	NIM
Cluster_101145	5	13608512	13609854	24	3'-2k	Zm00001d013526	-0.519025	DLPE	54	0.1629	NoDiff	60	-0.202715	NIM	377	-0.612973	TCdM
Cluster_101147	5	13613357	13613959	24	Gene body	Zm00001d013526	0.570337	DHPE	17	-0.545414	NoDiff	11	-0.777116	TCdM	62	-1.28992	TCdM
Cluster_101148	5	13614952	13615656	24	5'-2k	Zm00001d013526	-0.521381	DLPE	10	0.821755	TCM	8	0.388023	NoDiff	110	-0.826573	TCdM
Cluster_101149	5	13629480	13629960	24	3'-2k	Zm00001d013527	-0.421601	AE	0	0.995864	NoDiff	0	0.778154	NoDiff	0	0.160249	NoDiff
Cluster_10115	1	92226084	92226906	24	3'-2k	Zm00001d029887	0.230491	NoDiff	53	0.502839	NoDiff	30	1.80753	NoDiff	201	0.295182	NIM
Cluster_101151	5	13634552	13634992	24	5'-2k	Zm00001d013527	-0.49535	NoDiff	22	-1.92258	NoDiff	8	-1.35123	NoDiff	30	0.407845	NoDiff
Cluster_101152	5	13635072	13635830	24	3'-2k	Zm00001d013528	0.534425	NoDiff	52	-1.9092	NoDiff	34	3.68528	NoDiff	193	0.0954899	NoDiff
Cluster_101153	5	13636718	13637058	24	3'-2k	Zm00001d013528	0.843534	NoDiff	16	-0.0848506	NoDiff	15	0.531961	NoDiff	98	2.5134	NoDiff
Cluster_101155	5	13654809	13655320	24	Intergenic	-	0.138573	NoDiff	33	1.13321	NoDiff	21	1.30368	NoDiff	21	-1	NoDiff
Cluster_101157	5	13661521	13661763	24	Gene body	Zm00001d013529	0.766856	DHPE	1	0	NoDiff	0	0	NoDiff	0	0	NoDiff
Cluster_101158	5	13671383	13671744	24	5'-2k	Zm00001d013530	0.0380569	AE	19	0.642855	NoDiff	18	1.06174	TCM	77	0.530034	TCM
Cluster_101159	5	13741436	13742233	24	TE	-	0.256652	AE	63	0.403256	NoDiff	41	-0.963637	TCdM	124	-0.248331	NoDiff
Cluster_10116	1	92232982	92233575	24	5'-2k	Zm00001d029887	0.734687	DHPE	0	0.635068	NoDiff	0	0.834695	NoDiff	0	0.286259	NoDiff
Cluster_101160	5	13743453	13744271	24	5'-2k	Zm00001d013531	-0.092248	AE	67	0.947107	NoDiff	76	1.03795	NoDiff	213	1.04334	TCM
Cluster_101163	5	13749424	13749588	24	3'-2k	Zm00001d013532	1.39095	DHPE	13	0.789376	NoDiff	12	1.01709	NoDiff	52	0.950714	NoDiff
Cluster_101164	5	13754618	13754713	24	5'-2k	Zm00001d013532	-0.363568	AE	12	0	NoDiff	9	0	NoDiff	20	0	NoDiff
Cluster_101166	5	13760600	13760952	24	3'-2k	Zm00001d013533	1.66866	DHPE	27	0.813894	NoDiff	23	1.12969	NoDiff	111	1.95946	NoDiff
Cluster_101167	5	13761916	13762463	24	Gene body	Zm00001d013533	0.348758	AE	38	0.768547	NoDiff	43	0.844975	NoDiff	131	-0.467939	NIM
Cluster_10117	1	92240717	92241349	24	Intergenic	-	-0.337179	AE	19	-0.541245	NoDiff	16	0.16113	NoDiff	103	0.392204	NoDiff
Cluster_101170	5	13782888	13783041	24	5'-2k	Zm00001d013534	-0.377548	AE	0	0	NoDiff	0	0	NoDiff	0	0	NoDiff
Cluster_101173	5	13859813	13860646	24	3'-2k	Zm00001d013536	0.481837	NoDiff	70	-0.0356593	NoDiff	77	0.166205	NoDiff	168	-7.26087	NoDiff
Cluster_101175	5	13905760	13906223	24	Intergenic	-	0.502019	NoDiff	14	-0.723437	NoDiff	8	-0.118191	NoDiff	67	-0.402718	NIM
Cluster_101176	5	13926054	13926714	24	TE	-	-0.381661	AE	8	0.411549	NIM	10	1.75983	TCM	51	0.122616	NoDiff
Cluster_101177	5	13928228	13929376	24	5'-2k	Zm00001d013540	0.262839	AE	63	0.322576	NIM	46	0.247584	NIM	75	0.00532145	NIM
Cluster_101179	5	13940202	13940986	24	Gene body	Zm00001d013540	-0.128301	AE	42	1.05257	NoDiff	36	1.10191	NoDiff	60	4.2587	NoDiff
Cluster_10118	1	92241805	92242272	24	Intergenic	-	-0.603827	DLPE	7	3.71913	NoDiff	13	1.11333	NoDiff	35	-0.077489	NIM
Cluster_101182	5	13947590	13948064	24	Intergenic	-	-0.235641	NoDiff	3	0.96	NoDiff	5	1.32101	NoDiff	38	-0.183814	NoDiff
Cluster_101185	5	13967783	13967954	24	3'-2k	Zm00001d013543	7.90899	NoDiff	2	-1.13356	NoDiff	1	-8.41176	NoDiff	2	-1	NoDiff
Cluster_101188	5	14010224	14010901	24	5'-2k	Zm00001d013546	0.276485	AE	24	-1.14551	NoDiff	19	0.136332	NIM	173	-0.571011	NoDiff
Cluster_101189	5	14015026	14015782	24	3'-2k	Zm00001d013546	0.25451	NoDiff	13	0.347604	NoDiff	13	0.336427	NIM	95	-0.193893	NoDiff
Cluster_10119	1	92258418	92258822	24	Intergenic	-	0.447324	AE	2	0.882631	NoDiff	2	0.763578	NoDiff	14	-0.449171	NIM
Cluster_101190	5	14015892	14016337	24	3'-2k	Zm00001d013546	0.467569	NoDiff	5	-1	NoDiff	3	-2.07692	NoDiff	15	-1	NoDiff
Cluster_101193	5	14028402	14028552	24	5'-2k	Zm00001d013547	-0.017649	NoDiff	0	0.0461036	NoDiff	0	0.154927	NoDiff	0	9.05195	NoDiff
Cluster_101194	5	14034872	14035562	24	3'-2k	Zm00001d013547	0.731386	DHPE	49	0.162652	NoDiff	24	-1.01835	TCdM	152	-0.21411	NoDiff
Cluster_101196	5	14036311	14037227	24	5'-2k	Zm00001d013548	-0.47857	AE	67	1.29718	NoDiff	36	1.24285	NoDiff	169	-0.913374	NoDiff
Cluster_10120	1	92259059	92259432	24	Intergenic	-	0.219693	AE	0	0.896249	NoDiff	0	0.797719	NoDiff	0	0.549548	NoDiff
Cluster_101200	5	14096825	14097340	24	5'-2k	Zm00001d013553	-0.320542	AE	2	1.08453	NoDiff	2	-0.620114	NoDiff	44	0.157786	NoDiff
Cluster_101201	5	14099507	14099888	24	3'-2k	Zm00001d013553	0.450944	NoDiff	20	-177.873	NoDiff	31	0.474024	NoDiff	75	-1.06122	TCdM
Cluster_101202	5	14100416	14100767	24	Intergenic	-	-2.39248	NoDiff	25	-0.753753	NoDiff	19	-0.46789	NoDiff	70	-0.634775	NoDiff
Cluster_101203	5	14100873	14101677	24	Intergenic	-	-2.83706	NoDiff	45	5.35502	NoDiff	54	0.0200494	NoDiff	203	-4.18286	NoDiff
Cluster_101204	5	14103602	14104384	24	TE	-	0.0112802	AE	18	0.0390281	NoDiff	25	0.313797	NoDiff	50	-0.387995	NIM
Cluster_101206	5	14163888	14164185	24	5'-2k	Zm00001d013554	3.7601	NoDiff	0	0.907662	NoDiff	0	1.14091	NoDiff	0	2.80667	NoDiff
Cluster_101208	5	14167228	14167501	24	3'-2k	Zm00001d013554	-0.263164	AE	5	-3.00953	NoDiff	3	3.18065	NoDiff	32	-0.418612	NIM
Cluster_101209	5	14168587	14169134	24	TE	-	-0.11683	AE	0	0.989091	NoDiff	0	0.713412	NoDiff	0	0.480218	NoDiff
Cluster_10121	1	92259979	92260194	24	Intergenic	-	-0.645267	DLPE	1	-1	NoDiff	2	-0.798305	NoDiff	13	-0.719296	TCdM
Cluster_101211	5	14176276	14178608	24	5'-2k	Zm00001d013555	-0.0364708	AE	63	0.119672	NIM	46	0.20826	NIM	338	-0.396067	NoDiff
Cluster_101212	5	14179687	14180094	24	Intergenic	-	1.56988	DHPE	13	0.84358	TCM	12	0.792253	TCM	36	1.22342	TCM
Cluster_101213	5	14180567	14180988	24	Intergenic	-	0.0301155	AE	0	1.54297	NoDiff	0	1.29078	NoDiff	0	1.05465	NoDiff
Cluster_101214	5	14181453	14182423	24	TE	-	0.00439206	AE	43	0.713889	TCM	29	0.598682	TCM	116	0.0453403	NIM
Cluster_101215	5	14186232	14186705	24	Intergenic	-	1.57838	NoDiff	42	-0.13179	NIM	38	-0.235463	NIM	122	4.69845	NoDiff
Cluster_101216	5	14188450	14188840	24	Intergenic	-	0.0591142	AE	8	0.0621344	NoDiff	14	-1.42231	NoDiff	106	-0.254815	NoDiff
Cluster_101217	5	14189351	14189854	24	Intergenic	-	-0.0516302	AE	0	1.10551	NoDiff	0	-0.227817	NoDiff	0	-0.330546	NoDiff
Cluster_101220	5	14322513	14322777	24	5'-2k	Zm00001d013559	-0.392603	AE	8	-0.376223	NoDiff	2	-0.954704	NoDiff	30	-5.37066	NoDiff
Cluster_101221	5	14323005	14323915	24	5'-2k	Zm00001d013559	-0.247442	AE	0	0.991929	NoDiff	0	1.07824	NoDiff	0	0.345861	NoDiff
Cluster_101222	5	14327101	14327533	24	3'-2k	Zm00001d013559	-0.647056	DLPE	23	0.625509	NoDiff	19	0.158807	NIM	84	0.226493	NoDiff
Cluster_101227	5	14398851	14399201	24	5'-2k	Zm00001d013565	0.0161397	AE	18	0.366326	NoDiff	7	-1.77913	NoDiff	14	-1.22365	NoDiff
Cluster_101228	5	14401054	14401450	24	3'-2k	Zm00001d013565	0.709851	NoDiff	6	1.03603	NoDiff	20	1.25453	NoDiff	87	-0.304892	NoDiff
Cluster_101229	5	14432972	14433642	24	Intergenic	-	0.76591	NoDiff	62	-0.0407577	NoDiff	49	0.646838	NoDiff	188	-0.429404	NoDiff
Cluster_101231	5	14435341	14436244	24	5'-2k	Zm00001d013566	0.714542	NoDiff	35	0.468303	NoDiff	28	0.304465	NIM	281	-1.38856	NoDiff
Cluster_101232	5	14440748	14441121	24	3'-2k	Zm00001d013566	0.979659	NoDiff	6	5.5274	NoDiff	14	0.737289	NoDiff	90	-0.661584	TCdM
Cluster_101233	5	14441246	14441701	24	5'-2k	Zm00001d013567	-0.458842	NoDiff	35	0.742684	NoDiff	53	1.98115	NoDiff	109	-1.01128	NoDiff
Cluster_101234	5	14443481	14443981	24	3'-2k	Zm00001d013567	-1.03919	NoDiff	33	-1.64514	NoDiff	52	0.118139	NoDiff	112	-0.711687	TCdM
Cluster_101235	5	14444088	14444469	24	3'-2k	Zm00001d013567	0.78707	NoDiff	7	-0.882116	NoDiff	20	0.170112	NoDiff	72	1.27872	NoDiff
Cluster_101236	5	14447802	14448568	24	Intergenic	-	-3.15321	NoDiff	26	0.697614	NoDiff	104	2.08574	NoDiff	235	0.282987	NoDiff
Cluster_101238	5	14449954	14450666	24	3'-2k	Zm00001d013568	3.50877	NoDiff	60	-1.54893	NoDiff	62	-0.55466	NoDiff	169	-2.04407	NoDiff
Cluster_10124	1	92326214	92326604	24	5'-2k	Zm00001d029888	-0.271786	AE	0	0.982234	NoDiff	0	1.08016	NoDiff	0	0.81229	NoDiff
Cluster_101241	5	14452448	14452749	24	5'-2k	Zm00001d013568	-0.200174	AE	34	0.582266	NoDiff	17	-0.312283	NoDiff	82	-0.888437	NoDiff
Cluster_101242	5	14453434	14453847	24	5'-2k	Zm00001d013568	-0.529967	DLPE	39	0.119626	NoDiff	44	0.02378	NoDiff	63	-0.30953	NoDiff
Cluster_101243	5	14453984	14454696	24	Intergenic	-	0.858088	DHPE	49	6.25815	NoDiff	47	9.86564	NoDiff	196	-0.785461	NoDiff
Cluster_101244	5	14455938	14456856	24	5'-2k	Zm00001d013569	-1.53809	NoDiff	36	0.534177	NoDiff	54	-0.674635	TCdM	294	-0.319514	NoDiff
Cluster_101245	5	14457573	14459169	24	3'-2k	Zm00001d013569	0.868846	NoDiff	42	0.439871	NoDiff	103	-1.38064	NoDiff	487	-0.55193	NoDiff
Cluster_101246	5	14459300	14460161	24	Intergenic	-	-0.560855	DLPE	17	0.424069	NoDiff	59	-1.73043	NoDiff	230	3.17891	NoDiff
Cluster_101247	5	14460312	14462279	24	Intergenic	-	30.7133	NoDiff	51	-0.976554	NoDiff	162	-0.0573936	NIM	603	-0.379347	NoDiff
Cluster_101248	5	14462692	14464602	24	Intergenic	-	-0.233341	NoDiff	110	1.31422	NoDiff	109	0.470019	NoDiff	400	0.0772633	NoDiff
Cluster_101249	5	14469376	14469696	24	Intergenic	-	2.3432	NoDiff	16	80.3103	NoDiff	22	0.630246	TCM	74	-0.485941	NIM
Cluster_10125	1	92329176	92330669	24	Gene body	Zm00001d029888	-0.114062	AE	1	1.15402	NoDiff	1	1.19055	TCM	12	-0.972168	TCdM
Cluster_101250	5	14471723	14473672	24	5'-2k	Zm00001d013570	-0.81332	DLPE	164	2.08891	NoDiff	154	1.68718	NoDiff	360	-0.0244915	NoDiff
Cluster_101253	5	14477896	14478237	24	5'-2k	Zm00001d013571	2.30796	NoDiff	24	0.765182	NoDiff	24	0.202755	NIM	91	0.611232	NoDiff
Cluster_101254	5	14478707	14479331	24	5'-2k	Zm00001d013571	0.434454	NoDiff	48	1.65828	NoDiff	38	30.8712	NoDiff	119	0.695444	NoDiff
Cluster_101257	5	14486554	14488309	24	Gene body	Zm00001d013572	-2.63609	NoDiff	146	-0.151645	NoDiff	101	-0.437601	NoDiff	369	3.11333	NoDiff
Cluster_101258	5	14490260	14491059	24	Gene body	Zm00001d013572	3.03063	NoDiff	16	0.090814	NoDiff	12	1.06957	NoDiff	97	-0.567484	NoDiff
Cluster_101259	5	14491504	14492067	24	Gene body	Zm00001d013572	-0.295372	NoDiff	6	0.593256	NoDiff	13	0.710624	TCM	39	0.30316	NoDiff
Cluster_10126	1	92333260	92334110	24	3'-2k	Zm00001d029888	0.939512	DHPE	16	0.311864	NIM	9	0.062001	NIM	57	0.104346	NoDiff
Cluster_101260	5	14492909	14493604	24	Gene body	Zm00001d013572	0.205032	AE	4	0.823558	NoDiff	7	0.625983	TCM	33	-2.69371	NoDiff
Cluster_101261	5	14493921	14494726	24	Gene body	Zm00001d013572	0.366298	AE	14	0.453905	NoDiff	14	0.481962	NIM	75	8.21215	NoDiff
Cluster_101262	5	14496615	14497665	24	Gene body	Zm00001d013572	0.0207222	AE	31	0.808552	TCM	31	0.63202	TCM	210	-0.473383	NIM
Cluster_101265	5	14513225	14513524	24	3'-2k	Zm00001d013572	0.371147	AE	7	1.05517	NoDiff	9	0.897709	NoDiff	27	0.559501	NoDiff
Cluster_101266	5	14513845	14514220	24	3'-2k	Zm00001d013572	1.1685	NoDiff	20	0.0801172	NoDiff	9	1.8808	NoDiff	49	-0.520542	NoDiff
Cluster_101268	5	14537549	14537981	24	3'-2k	Zm00001d013573	0.403778	AE	0	0.904061	NoDiff	0	0.765477	NoDiff	0	1.69189	NoDiff
Cluster_101269	5	14541274	14542030	24	5'-2k	Zm00001d013573	113.882	NoDiff	36	-0.179678	NIM	45	-0.402342	NoDiff	162	0.900245	NoDiff
Cluster_101274	5	14562513	14563399	24	Gene body	Zm00001d013574	18.9983	NoDiff	56	-0.862593	NoDiff	33	0.434768	NoDiff	112	0.931066	NoDiff
Cluster_101275	5	14566818	14567329	24	Other	-	0.461074	AE	58	2.86266	NoDiff	52	4.35066	NoDiff	141	2.81976	NoDiff
Cluster_101278	5	14590850	14591287	24	5'-2k	Zm00001d013575	-0.868815	DLPE	38	-0.491825	NIM	26	-0.977584	TCdM	136	-0.958283	TCdM
Cluster_101280	5	14593643	14594459	24	3'-2k	Zm00001d013575	2.97777	NoDiff	74	0.15368	NoDiff	48	0.495776	NoDiff	201	-1.15806	NoDiff
Cluster_101285	5	14615105	14615660	24	TE	-	0.24809	NoDiff	44	-0.158362	NoDiff	43	-0.478205	NoDiff	182	-0.380125	NoDiff
Cluster_101287	5	14616282	14617023	24	TE	-	-0.450025	AE	62	0.2806	NIM	51	0.0883299	NIM	225	-0.528889	NoDiff
Cluster_101292	5	14734099	14734658	24	TE	-	0.69619	DHPE	35	1.22902	NoDiff	25	0.896529	NoDiff	151	-1.24277	NoDiff
Cluster_101293	5	14737102	14737719	24	TE	-	1.33102	NoDiff	57	0.4064	NoDiff	32	0.622511	NoDiff	149	-10.3545	NoDiff
Cluster_101295	5	14738295	14738576	24	TE	-	0.660783	NoDiff	22	-1.42582	NoDiff	16	-0.610111	NoDiff	74	-5.56744	NoDiff
Cluster_101297	5	14784871	14786149	24	TE	-	-0.605301	NoDiff	74	3.14971	NoDiff	71	15.0957	NoDiff	266	-0.474189	NoDiff
Cluster_101299	5	14801794	14802105	24	Intergenic	-	-0.224257	AE	4	1.03014	TCM	2	0.393584	NoDiff	1	-0.0549927	NoDiff
Cluster_1013	1	7569275	7569988	24	5'-2k	Zm00001d027534	-0.62428	DLPE	51	-0.0339784	NoDiff	27	0.954376	NoDiff	103	0.504465	NoDiff
Cluster_101300	5	14802611	14802762	24	Intergenic	-	-0.546157	DLPE	0	0.192676	NoDiff	0	-0.56291	NoDiff	0	-0.325046	NoDiff
Cluster_101301	5	14827844	14828067	24	5'-2k	Zm00001d013581	0.419119	AE	12	-0.852738	TCdM	12	1.72437	NoDiff	22	-30.8053	NoDiff
Cluster_101302	5	14828686	14828819	24	5'-2k	Zm00001d013581	0.503168	DHPE	0	-1	NoDiff	0	-1	NoDiff	0	0	NoDiff
Cluster_101306	5	14832690	14833217	24	TE	-	0.336176	AE	24	0.217316	NoDiff	30	0.88522	NoDiff	114	-0.0728383	NoDiff
Cluster_101307	5	14833577	14833908	24	Intergenic	-	93.4427	THPE	18	0	NoDiff	35	0	NoDiff	88	0	NoDiff
Cluster_101308	5	14834296	14834958	24	Intergenic	-	0.602347	DHPE	32	0.389165	NIM	29	0.461717	NIM	144	-0.238496	NIM
Cluster_101309	5	14835430	14836092	24	Intergenic	-	-0.18736	NoDiff	26	4.66455	NoDiff	35	1.06078	NoDiff	158	-0.148628	NoDiff
Cluster_101311	5	14837000	14837177	24	Intergenic	-	-0.352651	NoDiff	26	-33.8795	NoDiff	28	2.39326	NoDiff	47	-0.433013	NoDiff
Cluster_101313	5	14846514	14846802	24	5'-2k	Zm00001d013582	0.630725	NoDiff	14	-1.1681	NoDiff	16	-24.338	NoDiff	103	0.297725	NIM
Cluster_101314	5	14846896	14847533	24	5'-2k	Zm00001d013582	3.58123	NoDiff	28	-0.615647	NoDiff	22	-0.525781	NoDiff	158	0.289631	NIM
Cluster_101316	5	14857302	14858519	24	5'-2k	Zm00001d013583	2.19178	NoDiff	126	0.273027	NoDiff	92	-0.22717	NoDiff	254	-6.22218	NoDiff
Cluster_101317	5	14863190	14864750	24	Other	-	4.56561	NoDiff	93	1.12052	NoDiff	69	2.86622	NoDiff	329	-0.196782	NIM
Cluster_101318	5	14865321	14865847	24	Other	-	0.584383	DHPE	58	6.91418	NoDiff	33	-0.316367	NoDiff	82	0.379485	NIM
Cluster_101321	5	14914127	14914765	24	Intergenic	-	-0.115504	AE	31	0.545442	NoDiff	29	-0.00789035	NIM	124	-0.493245	NIM
Cluster_101324	5	14918242	14918842	24	TE	-	0.498899	AE	0	0.106207	NoDiff	0	-0.141866	NoDiff	0	-0.866989	NoDiff
Cluster_101325	5	14920709	14921141	24	Intergenic	-	-1.10513	DLPE	3	0.643002	NoDiff	2	0.707081	NoDiff	3	-0.686177	NoDiff
Cluster_101326	5	14925568	14925934	24	TE	-	1.84473	NoDiff	0	1.0709	NoDiff	0	1.06453	NoDiff	0	-0.485606	NoDiff
Cluster_101328	5	14943281	14944300	24	3'-2k	Zm00001d013588	-0.317102	AE	95	-0.146938	NIM	47	-0.0684702	NIM	298	1.20753	NoDiff
Cluster_101329	5	14947438	14948099	24	5'-2k	Zm00001d013588	0.643817	NoDiff	38	4.77008	NoDiff	33	0.373812	NoDiff	184	-4.29132	NoDiff
Cluster_10133	1	92551489	92552281	24	5'-2k	Zm00001d029889	-0.22742	AE	47	-0.444569	NoDiff	35	0.306285	NIM	166	-4.11637	NoDiff
Cluster_101331	5	14952002	14952095	24	TE	-	0.753488	NoDiff	17	4.25969	NoDiff	8	2.86182	NoDiff	18	0.430303	NoDiff
Cluster_101332	5	14973964	14974493	24	5'-2k	Zm00001d013589	-0.898311	NoDiff	31	22.7808	NoDiff	17	0.0333241	NoDiff	164	-0.387306	NoDiff
Cluster_101333	5	14974590	14974908	24	5'-2k	Zm00001d013589	6.03747	NoDiff	10	0.519407	NoDiff	12	-0.392532	NoDiff	104	1.75838	NoDiff
Cluster_101334	5	14985541	14986006	24	5'-2k	Zm00001d013590	0.408204	AE	0	1.05025	NoDiff	0	1.031	NoDiff	0	-0.212355	NoDiff
Cluster_101335	5	15029864	15031036	24	3'-2k	Zm00001d013591	-0.274929	AE	45	-1.54929	NoDiff	23	-0.550758	NoDiff	125	-0.57964	TCdM
Cluster_101336	5	15031172	15031594	24	3'-2k	Zm00001d013591	-0.0369297	AE	19	-0.481576	NoDiff	23	-0.11643	NIM	69	-0.0689505	NIM
Cluster_101337	5	15035531	15036339	24	Gene body	Zm00001d013592	1.02858	NoDiff	37	0.262274	NIM	60	0.462726	NIM	212	-0.111438	NoDiff
Cluster_101338	5	15038129	15038838	24	Gene body	Zm00001d013592	0.0819933	AE	2	0.954319	NoDiff	2	1.50557	NoDiff	13	0.23783	NIM
Cluster_10134	1	92561904	92562798	24	Gene body	Zm00001d029889	1.447	NoDiff	39	0.672176	NoDiff	34	21.4127	NoDiff	233	-1.68021	NoDiff
Cluster_101341	5	15047267	15047891	24	5'-2k	Zm00001d013594	0.502217	DHPE	0	0.872235	NoDiff	0	0.772547	NoDiff	0	-0.726684	NoDiff
Cluster_101342	5	15048395	15049419	24	Gene body	Zm00001d013594	0.603284	DHPE	77	-0.136234	NoDiff	59	-0.129753	NoDiff	187	0.0114057	NIM
Cluster_101344	5	15050995	15051341	24	3'-2k	Zm00001d013594	0.1451	AE	20	0.0446966	NoDiff	20	-0.103879	NoDiff	68	0.40754	NIM
Cluster_101345	5	15051647	15052064	24	3'-2k	Zm00001d013594	0.772959	NoDiff	0	0.947299	NoDiff	0	0.72727	NoDiff	0	-0.433931	NoDiff
Cluster_101346	5	15083800	15084195	24	TE	-	0.162904	AE	0	1.5184	NoDiff	0	5.6982	NoDiff	0	-0.34874	NoDiff
Cluster_101347	5	15084405	15084884	24	TE	-	0.168473	AE	0	1.05214	NoDiff	0	0.816504	NoDiff	0	0.351229	NoDiff
Cluster_101348	5	15085574	15086009	24	TE	-	0.200588	AE	0	0.0971199	NoDiff	0	0.672986	NoDiff	0	0.420433	NoDiff
Cluster_10135	1	92565119	92565825	24	3'-2k	Zm00001d029889	0.328798	NoDiff	34	0.427466	NoDiff	21	-0.688139	NoDiff	55	-3.18018	NoDiff
Cluster_101350	5	15086529	15087608	24	TE	-	-0.0406449	AE	53	0.173875	NIM	34	0.508261	TCM	294	-2.41729	NoDiff
Cluster_101351	5	15093957	15094418	24	3'-2k	Zm00001d013595	0.325055	NoDiff	16	-45.3134	NoDiff	7	0.660581	NoDiff	34	-1.23592	NoDiff
Cluster_101353	5	15106835	15107460	24	5'-2k	Zm00001d013598	0.241745	AE	23	24.3994	NoDiff	26	0.55526	NoDiff	97	-2.06217	NoDiff
Cluster_101355	5	15109078	15109836	24	3'-2k	Zm00001d013599	-0.18072	NoDiff	22	-0.128023	NIM	15	-0.0424001	NIM	243	-0.593689	NoDiff
Cluster_101358	5	15116827	15117410	24	Gene body	Zm00001d013599	-1.60512	NoDiff	30	-1.33344	NoDiff	19	0.967485	NoDiff	168	15.4899	NoDiff
Cluster_101359	5	15119739	15121003	24	Gene body	Zm00001d013599	-0.0554755	NoDiff	59	-0.63663	NoDiff	109	1.09811	NoDiff	312	-0.376028	NoDiff
Cluster_101361	5	15127727	15128728	24	TE	-	0.477118	AE	103	-0.713452	NoDiff	40	-360.969	NoDiff	149	0.445192	NoDiff
Cluster_101363	5	15160249	15161219	24	TE	-	0.168174	AE	98	0.996054	NoDiff	57	0.972917	NoDiff	216	0.232105	NoDiff
Cluster_101364	5	15161917	15162586	24	TE	-	0.453205	AE	72	-0.156694	NIM	51	0.570278	TCM	103	-2.2181	NoDiff
Cluster_101366	5	15180037	15180206	24	Other	-	-0.316491	AE	4	0.347317	NoDiff	1	4.18232	NoDiff	5	0.879234	NoDiff
Cluster_101368	5	15183112	15183420	24	Other	-	-0.447206	AE	9	0.00899408	NoDiff	7	1.21072	NoDiff	22	0.872048	NoDiff
Cluster_101370	5	15184593	15184780	24	Other	-	0.677888	DHPE	0	0	NoDiff	0	0	NoDiff	0	0	NoDiff
Cluster_101371	5	15195540	15195847	24	Intergenic	-	-0.136359	AE	0	0	NoDiff	0	0	NoDiff	0	-1	NoDiff
Cluster_101377	5	15290771	15291079	24	TE	-	-0.364732	AE	12	2.06754	TCM	8	20.6995	NoDiff	57	0.42748	NIM
Cluster_101379	5	15293271	15293504	24	Intergenic	-	-2.36997	NoDiff	0	1.12903	NoDiff	0	-0.183673	NoDiff	0	-1	NoDiff
Cluster_10138	1	92591477	92592091	24	Intergenic	-	-1.0301	DLPE	67	-5.90638	NoDiff	42	0.280252	NoDiff	145	-0.252469	NoDiff
Cluster_101380	5	15294393	15295121	24	Intergenic	-	0.454516	AE	42	-0.382852	NoDiff	46	-1.12211	NoDiff	201	-1.15964	NoDiff
Cluster_101381	5	15295677	15296195	24	Intergenic	-	-7.36609	NoDiff	29	0.201025	NoDiff	21	0.680234	NoDiff	133	-0.741456	TCdM
Cluster_101382	5	15296716	15297214	24	TE	-	1.07179	NoDiff	24	0.670672	NoDiff	16	0.494463	NIM	124	1.26649	TCM
Cluster_101384	5	15321686	15321771	24	3'-2k	Zm00001d013609	-0.60219	DLPE	0	-1	NoDiff	0	-1	NoDiff	0	0	NoDiff
Cluster_101385	5	15326481	15327589	24	3'-2k	Zm00001d013610	2.56346	NoDiff	121	21.2069	NoDiff	129	0.256986	NoDiff	236	0.239928	NoDiff
Cluster_101387	5	15338203	15338500	24	Intergenic	-	-0.129902	NoDiff	37	4.46465	NoDiff	35	1.60232	NoDiff	65	-0.267608	NIM
Cluster_101388	5	15338886	15339593	24	Intergenic	-	-0.023432	NoDiff	38	1.44483	NoDiff	24	-0.263177	NoDiff	221	-1.09475	NoDiff
Cluster_101390	5	15340293	15341007	24	TE	-	-0.934861	NoDiff	41	0.0126529	NoDiff	40	0.527692	NoDiff	205	-4.86993	NoDiff
Cluster_101391	5	15348259	15348795	24	TE	-	-0.454459	AE	36	1.98132	NoDiff	35	31.0464	NoDiff	113	-0.126459	NoDiff
Cluster_101393	5	15349502	15349943	24	Intergenic	-	0.219954	NoDiff	48	2.10473	NoDiff	26	0.078314	NoDiff	100	0.123131	NIM
Cluster_101394	5	15351254	15351692	24	3'-2k	Zm00001d013611	2.61194	NoDiff	18	0.341852	NoDiff	23	-15.3665	NoDiff	72	-0.499514	NoDiff
Cluster_101396	5	15354764	15355262	24	5'-2k	Zm00001d013611	0.0909432	AE	0	0.758896	NoDiff	0	0.579719	NoDiff	0	0.0424451	NoDiff
Cluster_101397	5	15359978	15360462	24	Intergenic	-	0.104481	AE	0	1.3773	NoDiff	0	1.05364	NoDiff	0	0.898603	NoDiff
Cluster_101398	5	15362795	15363646	24	3'-2k	Zm00001d013612	0.049092	NoDiff	47	-0.779655	NoDiff	38	1.107	NoDiff	249	0.601246	TCM
Cluster_101400	5	15368436	15368968	24	5'-2k	Zm00001d013612	1.83473	NoDiff	18	0.302597	NoDiff	9	0.315444	NoDiff	163	1.17522	NoDiff
Cluster_101401	5	15369705	15370514	24	5'-2k	Zm00001d013612	0.576154	DHPE	48	0.921137	NoDiff	52	0.943554	NoDiff	248	0.80314	NoDiff
Cluster_101402	5	15386591	15387035	24	TE	-	-0.0457831	AE	61	0.969228	NoDiff	34	1.03871	NoDiff	127	3.70517	NoDiff
Cluster_101403	5	15388210	15388420	24	TE	-	0.160119	AE	10	0.985075	NoDiff	1	0.656575	NoDiff	49	0.768083	NoDiff
Cluster_101404	5	15399123	15399314	24	TE	-	-0.123375	AE	26	1.12592	NoDiff	6	1.54187	NoDiff	28	-1.61886	TCdM
Cluster_101407	5	15421414	15421859	24	5'-2k	Zm00001d013614	-0.316765	AE	53	-24.0587	NoDiff	30	-1.6159	NoDiff	83	-3.77921	NoDiff
Cluster_101408	5	15424621	15425562	24	3'-2k	Zm00001d013614	0.220816	AE	61	1.39168	NoDiff	47	2.53509	NoDiff	267	-0.525514	TCdM
Cluster_101409	5	15425920	15426253	24	3'-2k	Zm00001d013614	-0.0334075	AE	28	1.7882	NoDiff	18	1.13789	NoDiff	73	0.312139	NoDiff
Cluster_10141	1	92679511	92680420	24	Intergenic	-	-0.145703	NoDiff	42	0.0431396	NoDiff	18	1.23799	NoDiff	151	-0.942263	NoDiff
Cluster_101410	5	15427896	15428469	24	TE	-	0.882496	DHPE	35	0.357038	NoDiff	17	0.964248	NoDiff	97	-0.0788861	NoDiff
Cluster_101411	5	15441900	15442141	24	TE	-	-0.124481	AE	17	-0.245942	NoDiff	17	-0.0408757	NoDiff	54	-0.905504	TCdM
Cluster_101414	5	15492510	15492718	24	5'-2k	Zm00001d013615	0.398346	AE	0	0.18239	NoDiff	0	-0.62361	NoDiff	0	-0.0581837	NoDiff
Cluster_101415	5	15496022	15496561	24	3'-2k	Zm00001d013615	-0.266254	AE	70	1.13009	NoDiff	42	1.07109	NoDiff	151	0.465453	NoDiff
Cluster_101416	5	15564160	15564797	24	Intergenic	-	-0.13272	AE	64	0.942731	NoDiff	39	1.04129	NoDiff	134	1.23008	NoDiff
Cluster_101417	5	15566625	15566769	24	3'-2k	Zm00001d013616	-0.315947	AE	0	0	NoDiff	0	0	NoDiff	6	0.882075	NoDiff
Cluster_101418	5	15577781	15577827	24	3'-2k	Zm00001d013617	0.14232	AE	0	0	NoDiff	0	0	NoDiff	0	0	NoDiff
Cluster_10142	1	92681244	92681524	24	3'-2k	Zm00001d029891	0.0066743	AE	13	-0.289156	NoDiff	20	-0.366111	NoDiff	75	-0.54568	NoDiff
Cluster_101422	5	15630290	15630409	24	TE	-	-13.2108	NoDiff	0	0	NoDiff	0	0	NoDiff	0	0	NoDiff
Cluster_101424	5	15652847	15653218	24	3'-2k	Zm00001d013619	3.54906	NoDiff	22	-1.29409	NoDiff	20	-1.65091	NoDiff	79	-3.73248	NoDiff
Cluster_101425	5	15653475	15653898	24	3'-2k	Zm00001d013619	3.94283	NoDiff	46	-2.63095	NoDiff	30	-7.24824	NoDiff	99	-1.72493	NoDiff
Cluster_101426	5	15656104	15656338	24	5'-2k	Zm00001d013619	0.943766	NoDiff	9	-2.88391	NoDiff	7	2.01905	NoDiff	36	-1.52086	TCdM
Cluster_101427	5	15660056	15660940	24	Intergenic	-	-0.106099	AE	58	0.269031	NIM	49	0.544402	NoDiff	223	0.203435	NoDiff
Cluster_10143	1	92683362	92683516	24	5'-2k	Zm00001d029891	-0.676607	NoDiff	18	-0.506991	NoDiff	14	-0.568316	NoDiff	25	0.69365	NoDiff
Cluster_101430	5	15671258	15671566	24	5'-2k	Zm00001d013620	-0.078214	AE	9	0.0828062	NoDiff	8	0.107353	NoDiff	24	-0.373602	NoDiff
Cluster_101432	5	15673822	15674161	24	Gene body	Zm00001d013620	-1.42414	NoDiff	43	0.590964	NoDiff	20	0.470289	NoDiff	89	0.351071	NIM
Cluster_101433	5	15681634	15682096	24	3'-2k	Zm00001d013620	0.80311	DHPE	6	2.25356	NoDiff	8	6.46341	NoDiff	116	1.54251	NoDiff
Cluster_101434	5	15682501	15683089	24	3'-2k	Zm00001d013620	0.613053	DHPE	26	1.03015	NoDiff	30	1.03211	NoDiff	145	-1.03213	NoDiff
Cluster_101435	5	15683366	15683655	24	TE	-	-0.259758	AE	22	1.0213	NoDiff	26	0.939189	NoDiff	80	0.615292	NoDiff
Cluster_101436	5	15685500	15685918	24	5'-2k	Zm00001d013621	-0.597709	DLPE	50	1.05918	NoDiff	53	1.16696	NoDiff	100	1.2449	NoDiff
Cluster_101438	5	15727625	15728574	24	5'-2k	Zm00001d013624	-0.189335	AE	106	1.07096	NoDiff	44	1.1884	NoDiff	182	0.211245	NoDiff
Cluster_101440	5	15736979	15737432	24	3'-2k	Zm00001d013626	0.506393	NoDiff	34	3.08382	NoDiff	34	2.11695	NoDiff	108	0.898045	TCM
Cluster_101441	5	15748432	15748967	24	5'-2k	Zm00001d013627	-0.188179	AE	10	-0.174949	NIM	11	-0.404048	NIM	31	-0.063005	NIM
Cluster_101444	5	15821285	15822650	24	Intergenic	-	2.00302	NoDiff	71	-0.168016	NoDiff	38	4.26431	NoDiff	202	-0.909712	NoDiff
Cluster_101445	5	15851890	15852812	24	Intergenic	-	-0.410287	NoDiff	55	-3.17509	NoDiff	57	-1.30279	TCdM	164	-21.3945	NoDiff
Cluster_101446	5	15852963	15853518	24	Intergenic	-	-0.618804	DLPE	52	2.21641	NoDiff	49	0.753238	NoDiff	107	0.328856	NoDiff
Cluster_101447	5	15856152	15856406	24	5'-2k	Zm00001d013629	-0.496653	NoDiff	0	0	NoDiff	0	0	NoDiff	0	0	NoDiff
Cluster_101448	5	15861226	15861341	24	Intergenic	-	0.526735	DHPE	0	0	NoDiff	0	0	NoDiff	0	0	NoDiff
Cluster_10145	1	92730771	92731362	24	TE	-	-0.76951	NoDiff	46	0.0890988	NIM	35	-0.132796	NIM	122	-0.616813	NoDiff
Cluster_101450	5	15863610	15863872	24	5'-2k	Zm00001d013630	-1.82267	NoDiff	0	0	NoDiff	0	0	NoDiff	0	0	NoDiff
Cluster_101451	5	15866396	15866451	24	3'-2k	Zm00001d013631	-1.64506	DLPE	0	0	NoDiff	0	0	NoDiff	0	0	NoDiff
Cluster_101452	5	15876417	15877413	24	5'-2k	Zm00001d013632	0.345539	AE	50	1.48945	NoDiff	37	1.55984	NoDiff	165	-0.342369	NIM
Cluster_101456	5	15968869	15969877	24	3'-2k	Zm00001d013635	0.0186942	NoDiff	44	0.281759	NoDiff	44	4.07126	NoDiff	270	-0.651449	NoDiff
Cluster_101457	5	15971285	15971712	24	Gene body	Zm00001d013635	5.47855	NoDiff	10	-1.3723	NoDiff	10	0.929178	NoDiff	119	0.871006	TCM
Cluster_101458	5	15983610	15983738	24	3'-2k	Zm00001d013638	-0.251258	AE	0	0	NoDiff	0	0	NoDiff	0	0	NoDiff
Cluster_101459	5	15986753	15986927	24	5'-2k	Zm00001d013638	3.80594	NoDiff	0	0	NoDiff	0	0	NoDiff	0	0	NoDiff
Cluster_10146	1	92731486	92732055	24	TE	-	-0.276249	AE	0	1.07722	NoDiff	0	0.924294	NoDiff	0	0.71612	NoDiff
Cluster_101460	5	15989414	15989518	24	Intergenic	-	-2.07754	NoDiff	0	0	NoDiff	0	0	NoDiff	0	0	NoDiff
Cluster_101461	5	15990229	15991149	24	Intergenic	-	0.478085	AE	92	2.49294	NoDiff	44	7.02628	NoDiff	201	0.750539	TCM
Cluster_101462	5	15997816	15998117	24	5'-2k	Zm00001d013639	0.22808	AE	0	0.968659	NoDiff	0	0.965991	NoDiff	1	-0.256771	NoDiff
Cluster_101464	5	15998429	15998708	24	5'-2k	Zm00001d013639	0.266586	AE	2	0.0222672	NoDiff	3	0.925012	NoDiff	43	0.339606	NIM
Cluster_101465	5	16001581	16002782	24	3'-2k	Zm00001d013639	-0.429143	AE	0	1.00093	NoDiff	0	0.90798	NoDiff	0	-0.402299	NoDiff
Cluster_101469	5	16046478	16046825	24	5'-2k	Zm00001d013641	-0.14528	AE	0	0.914926	NoDiff	0	0.659195	NoDiff	0	0.932522	NoDiff
Cluster_101470	5	16049193	16049658	24	3'-2k	Zm00001d013641	-0.502549	DLPE	27	-0.408739	NoDiff	18	-1.35107	NoDiff	124	-1.15757	NoDiff
Cluster_101473	5	16111849	16112114	24	5'-2k	Zm00001d013644	-0.185936	AE	8	1.83466	NoDiff	13	18.5384	NoDiff	61	1.88144	NoDiff
Cluster_101474	5	16121360	16122970	24	3'-2k	Zm00001d013646	-0.0423901	AE	105	1.64831	NoDiff	79	-1.20471	NoDiff	407	-0.719723	NoDiff
Cluster_101475	5	16123624	16123995	24	3'-2k	Zm00001d013646	-0.385627	AE	10	1.24537	NoDiff	7	-1.96432	NoDiff	105	-0.22196	NIM
Cluster_101476	5	16127302	16127573	24	5'-2k	Zm00001d013646	-0.725404	DLPE	7	-1.13692	NoDiff	6	-0.113072	NoDiff	35	-3.3771	NoDiff
Cluster_101478	5	16132353	16132466	24	5'-2k	Zm00001d013647	-0.475932	AE	6	-0.0765784	NIM	11	0.159096	NIM	23	0.0207807	NIM
Cluster_10148	1	92738626	92739352	24	TE	-	0.93106	NoDiff	13	-0.225412	NoDiff	20	0.40577	NIM	190	-0.213166	NoDiff
Cluster_101480	5	16146373	16146618	24	Intergenic	-	24.4393	THPE	4	-1.45	NoDiff	12	0.212612	NoDiff	45	-0.70952	NoDiff
Cluster_101485	5	16194180	16194344	24	TE	-	0.563482	DHPE	2	-7.76049	NoDiff	7	-0.744889	NoDiff	12	1.8623	NoDiff
Cluster_10149	1	92762396	92763529	24	Intergenic	-	-0.14358	AE	90	0.156893	NIM	47	0.492002	NoDiff	284	-0.147956	NIM
Cluster_101490	5	16257056	16257578	24	5'-2k	Zm00001d013653	2.36211	NoDiff	6	-3.78954	NoDiff	10	-3.34539	TCdM	55	-2.22653	TCdM
Cluster_101493	5	16265970	16267027	24	Gene body	Zm00001d013653	0.712172	DHPE	49	0.848453	NoDiff	54	1.41646	NoDiff	233	0.135995	NoDiff
Cluster_101496	5	16273651	16274787	24	Gene body	Zm00001d013653	3.81626	NoDiff	40	-3.26519	NoDiff	65	9.88094	NoDiff	329	-0.930947	NoDiff
Cluster_101497	5	16275216	16275905	24	Gene body	Zm00001d013653	-1.93912	NoDiff	11	4.14123	NoDiff	14	-0.439479	NoDiff	24	1.20718	NoDiff
Cluster_101499	5	16276660	16277168	24	Gene body	Zm00001d013653	0.843305	NoDiff	18	0.812441	NoDiff	27	0.504495	NoDiff	81	0.866967	NoDiff
Cluster_10150	1	92764033	92764214	24	Intergenic	-	0.343303	NoDiff	16	11.3514	NoDiff	22	0.335328	NIM	43	-0.024901	NIM
Cluster_101500	5	16277271	16277655	24	Gene body	Zm00001d013653	5.28634	NoDiff	11	-0.101896	NoDiff	11	0.172726	NoDiff	26	0.112042	NoDiff
Cluster_101502	5	16278298	16278920	24	Gene body	Zm00001d013653	1.83923	NoDiff	24	1.44466	NoDiff	37	0.657553	NoDiff	124	-0.122403	NoDiff
Cluster_101503	5	16279159	16280986	24	Gene body	Zm00001d013653	-7.11032	NoDiff	47	0.519575	NoDiff	59	0.0922449	NIM	488	0.86088	NoDiff
Cluster_101508	5	16287903	16288198	24	3'-2k	Zm00001d013653	0.482095	NoDiff	2	-0.227887	NoDiff	3	-0.809061	NoDiff	24	0.431167	NIM
Cluster_101509	5	16288406	16288552	24	TE	-	2.19047	NoDiff	0	0	NoDiff	0	0	NoDiff	0	0	NoDiff
Cluster_10151	1	92765088	92765459	24	Intergenic	-	-0.217993	NoDiff	0	0.907218	NoDiff	1	0.918398	NoDiff	8	0.3276	NoDiff
Cluster_101510	5	16290503	16290868	24	TE	-	0.0688442	NoDiff	12	-2.96608	NoDiff	7	0.593952	NoDiff	48	-2.00087	NoDiff
Cluster_101514	5	16351452	16352224	24	3'-2k	Zm00001d013655	-0.777814	NoDiff	74	-3.57504	NoDiff	43	1.66495	NoDiff	117	-0.389926	NoDiff
Cluster_101516	5	16353088	16353525	24	3'-2k	Zm00001d013655	-3.31837	NoDiff	33	-0.451174	NoDiff	20	-0.695003	NoDiff	124	1.15371	NoDiff
Cluster_101517	5	16361239	16361607	24	5'-2k	Zm00001d013656	-0.13959	AE	26	-0.00773994	NIM	25	-0.225098	NIM	71	0.327889	NoDiff
Cluster_10152	1	92775160	92775814	24	Intergenic	-	-0.0232042	AE	11	-1.29275	NoDiff	12	0.157434	NIM	103	33.1628	NoDiff
Cluster_101522	5	16521084	16521448	24	3'-2k	Zm00001d013658	-0.630489	NoDiff	20	0.480144	NoDiff	12	1.10999	NoDiff	91	-0.00586164	NoDiff
Cluster_101523	5	16526361	16526787	24	5'-2k	Zm00001d013658	7.18345	NoDiff	30	-0.260112	NIM	21	1.0552	NoDiff	67	5.60013	NoDiff
Cluster_101524	5	16527295	16527567	24	5'-2k	Zm00001d013658	-0.282325	AE	0	1.11999	NoDiff	0	1.0835	NoDiff	0	0.177641	NoDiff
Cluster_101525	5	16527953	16528118	24	Intergenic	-	0.00615733	AE	0	-0.0255557	NoDiff	0	0.122988	NoDiff	0	-0.578382	NoDiff
Cluster_101528	5	16551028	16551469	24	TE	-	-2.41648	NoDiff	2	0.241264	NoDiff	1	-0.909809	NoDiff	1	-0.400388	NoDiff
Cluster_101529	5	16551901	16552032	24	3'-2k	Zm00001d013659	-0.841824	NoDiff	4	1.1063	NoDiff	12	0.251991	NoDiff	9	-0.42788	NIM
Cluster_10153	1	92820162	92820590	24	TE	-	1.25942	NoDiff	20	0.0273418	NoDiff	14	0.0202817	NIM	126	0.136152	NoDiff
Cluster_101530	5	16558285	16558604	24	Gene body	Zm00001d013659	0.00439271	NoDiff	18	1.09224	NoDiff	26	1.33646	NoDiff	79	-3.65413	NoDiff
Cluster_101531	5	16561484	16561929	24	5'-2k	Zm00001d013659	1.2354	NoDiff	34	1.22046	NoDiff	33	6.4589	NoDiff	91	5.24047	TCM
Cluster_101534	5	16641363	16642122	24	5'-2k	Zm00001d013660	1.52277	NoDiff	27	-1.0839	NoDiff	26	-0.910368	NoDiff	134	-0.336144	NoDiff
Cluster_101535	5	16657352	16658274	24	5'-2k	Zm00001d013662	0.4342	AE	38	0.265074	NoDiff	35	-0.341462	NoDiff	81	-1.37361	TCdM
Cluster_101538	5	16664878	16665237	24	TE	-	-0.67009	DLPE	0	1.07969	NoDiff	14	-0.366869	NoDiff	75	-1.52893	TCdM
Cluster_101539	5	16666019	16666296	24	Intergenic	-	-0.282254	AE	0	0.782072	NoDiff	0	0.591071	NoDiff	0	0.251247	NoDiff
Cluster_10154	1	92820940	92821167	24	Intergenic	-	-0.0979028	AE	0	-1	NoDiff	0	0	NoDiff	0	0	NoDiff
Cluster_101540	5	16666404	16666911	24	Intergenic	-	-0.538847	DLPE	0	0.999799	NoDiff	0	0.840634	NoDiff	0	0.299839	NoDiff
Cluster_101542	5	16702495	16702919	24	TE	-	-0.574695	NoDiff	0	1.06678	NoDiff	0	1.10045	NoDiff	0	-1	NoDiff
Cluster_101543	5	16714844	16715067	24	5'-2k	Zm00001d013663	5.86638	NoDiff	15	0.757351	TCM	17	0.633611	TCM	42	0.0888459	NIM
Cluster_101544	5	16715201	16716252	24	5'-2k	Zm00001d013663	0.0586917	NoDiff	68	0.115151	NoDiff	46	0.502204	TCM	189	-1.80952	TCdM
Cluster_101545	5	16716739	16717243	24	TE	-	0.543654	DHPE	47	0.865764	NoDiff	35	0.830423	NoDiff	102	0.487706	NoDiff
Cluster_101546	5	16717326	16718029	24	TE	-	-0.313967	AE	73	1.0207	NoDiff	80	1.10483	NoDiff	193	0.567577	NoDiff
Cluster_101548	5	16719250	16720098	24	TE	-	1.42049	DHPE	32	1.67243	TCM	18	-0.620493	NoDiff	256	-0.245389	NIM
Cluster_10155	1	92821534	92821786	24	Intergenic	-	-0.251684	AE	12	0.392246	NIM	10	0.167432	NIM	41	0.0565983	NIM
Cluster_101550	5	16759371	16759851	24	TE	-	0.131971	AE	39	0.774868	NoDiff	39	1.02026	NoDiff	119	-0.0777563	NIM
Cluster_101551	5	16760535	16760964	24	TE	-	0.358199	AE	37	-0.11672	NoDiff	50	0.828863	NoDiff	113	4.28623	NoDiff
Cluster_101552	5	16765850	16766062	24	3'-2k	Zm00001d013664	-0.203213	AE	24	1.61716	NoDiff	32	1.13898	NoDiff	58	0.686101	NoDiff
Cluster_101554	5	16866865	16867093	24	3'-2k	Zm00001d013666	0.0326281	AE	12	-0.805363	NoDiff	16	0.608424	NoDiff	49	-0.0973149	NoDiff
Cluster_101555	5	16868965	16869621	24	5'-2k	Zm00001d013666	-1.04517	NoDiff	36	1.66189	NoDiff	23	246.694	NoDiff	58	-3.01922	NoDiff
Cluster_101557	5	16884768	16885040	24	Intergenic	-	0.760509	NoDiff	0	0	NoDiff	0	0	NoDiff	0	0	NoDiff
Cluster_101558	5	16889455	16889681	24	5'-2k	Zm00001d013667	0.79131	DHPE	0	-1.17385	NoDiff	0	-2.42938	NoDiff	0	-1	NoDiff
Cluster_101559	5	16909435	16910308	24	Intergenic	-	-0.262702	AE	27	0.769073	NoDiff	13	-0.309764	NoDiff	85	4.18673	NoDiff
Cluster_10156	1	92823104	92824113	24	Intergenic	-	4.57113	NoDiff	51	-1.57653	NoDiff	39	-0.0345196	NoDiff	264	-0.331323	NoDiff
Cluster_101562	5	16998398	16998638	24	TE	-	2.03404	THPE	19	-1.1522	NoDiff	11	-0.164565	NoDiff	56	0.378986	NIM
Cluster_101563	5	17005356	17005484	24	TE	-	2.95269	NoDiff	0	0	NoDiff	0	0	NoDiff	0	0	NoDiff
Cluster_101564	5	17006702	17006953	24	TE	-	0.299508	AE	0	0	NoDiff	0	0.623284	NoDiff	5	-0.29587	NIM
Cluster_101565	5	17019098	17019517	24	5'-2k	Zm00001d013673	0.132883	NoDiff	8	0.122931	NoDiff	15	0.0542238	NIM	66	0.229807	NoDiff
Cluster_101568	5	17046064	17046390	24	Other	-	3.93286	THPE	0	0.88434	NoDiff	0	0	NoDiff	0	0	NoDiff
Cluster_10157	1	92824349	92825345	24	Intergenic	-	2.03792	NoDiff	40	-4.53238	NoDiff	25	1.13446	NoDiff	335	-8.42807	NoDiff
Cluster_101573	5	17131799	17132193	24	TE	-	-0.421992	AE	1	2.82646	NoDiff	4	5.87221	NoDiff	28	1.22181	NoDiff
Cluster_101576	5	17202740	17203435	24	TE	-	-4.43803	NoDiff	43	1.15774	NoDiff	26	0.998989	NoDiff	90	-10.4166	NoDiff
Cluster_101577	5	17204035	17204357	24	TE	-	3.4655	NoDiff	0	1.02941	NoDiff	0	1.56024	NoDiff	6	0.0861963	NoDiff
Cluster_101578	5	17243603	17244027	24	TE	-	26.819	NoDiff	0	0	NoDiff	0	0	NoDiff	0	0	NoDiff
Cluster_101579	5	17246191	17246417	24	TE	-	-0.0189949	AE	0	0	NoDiff	0	0	NoDiff	0	0	NoDiff
Cluster_10158	1	92826135	92826512	24	Intergenic	-	-0.202964	NoDiff	36	0.106195	NoDiff	29	-0.676953	NoDiff	82	-0.072484	NIM
Cluster_101580	5	17246988	17247634	24	TE	-	0.827725	NoDiff	40	0.939979	NoDiff	39	2.16076	NoDiff	140	-5.0928	NoDiff
Cluster_101581	5	17247726	17248451	24	TE	-	0.204064	AE	36	0.358296	NoDiff	16	0.0454843	NoDiff	217	-0.241053	NIM
Cluster_101582	5	17248546	17249752	24	TE	-	0.0809237	AE	68	0.39869	NIM	68	0.504829	TCM	267	1.36299	TCM
Cluster_101585	5	17280848	17281100	24	3'-2k	Zm00001d013683	0.435291	AE	3	-0.0859356	NoDiff	15	0.565831	TCM	60	0.041922	NIM
Cluster_101586	5	17281288	17281777	24	3'-2k	Zm00001d013683	-1.34539	NoDiff	26	-2.29753	NoDiff	29	1.43535	NoDiff	93	-0.308684	NIM
Cluster_101587	5	17282174	17282370	24	3'-2k	Zm00001d013683	0.765873	NoDiff	0	0	NoDiff	0	0	NoDiff	0	0	NoDiff
Cluster_101588	5	17286197	17288202	24	Gene body	Zm00001d013683	-0.0482214	NoDiff	194	0.743219	NoDiff	132	0.711219	NoDiff	360	3.49002	NoDiff
Cluster_10159	1	92826695	92827392	24	TE	-	-0.43039	AE	66	-1.86871	NoDiff	47	11.4217	NoDiff	123	1.66067	NoDiff
Cluster_101591	5	17289861	17290602	24	Gene body	Zm00001d013683	0.0363482	NoDiff	77	27.7018	NoDiff	63	0.447437	NoDiff	172	-8.71517	NoDiff
Cluster_101592	5	17296102	17296337	24	5'-2k	Zm00001d013683	-0.224148	AE	6	0.261937	NIM	7	-0.590915	NoDiff	79	-1.17972	NoDiff
Cluster_101593	5	17296413	17297135	24	5'-2k	Zm00001d013683	2.52329	NoDiff	90	-0.566785	NoDiff	59	0.214521	NoDiff	218	-0.0943337	NoDiff
Cluster_101594	5	17298625	17299201	24	TE	-	0.403569	AE	54	-1.16018	NoDiff	32	-1.00864	NoDiff	200	0.820919	NoDiff
Cluster_101597	5	17401892	17402098	24	TE	-	-0.21644	AE	48	-1.03609	NoDiff	19	0.734905	NoDiff	54	-12.969	NoDiff
Cluster_101598	5	17402193	17402480	24	TE	-	-0.471038	AE	38	1.49261	NoDiff	19	1.73436	NoDiff	86	-0.518037	NoDiff
Cluster_1016	1	7599629	7600178	24	Gene body	Zm00001d027535	-0.902975	DLPE	13	-0.322281	NIM	15	-0.668013	TCdM	97	-0.692826	TCdM
Cluster_101601	5	17452373	17453010	24	3'-2k	Zm00001d013688	6.01288	NoDiff	36	1.17495	NoDiff	27	-15.3126	NoDiff	158	-3.61614	NoDiff
Cluster_101602	5	17458767	17459444	24	Other	-	1.73439	NoDiff	29	1.32688	NoDiff	23	0.919359	TCM	114	-0.544088	NoDiff
Cluster_101603	5	17460158	17460622	24	Other	-	2.07293	NoDiff	8	1.21979	NoDiff	8	0.692614	NoDiff	34	-2.14607	TCdM
Cluster_101604	5	17460853	17461555	24	Intergenic	-	1.36001	DHPE	30	-0.897027	NoDiff	33	-0.526226	NoDiff	171	-0.33408	NoDiff
Cluster_101605	5	17461802	17461940	24	Intergenic	-	-1	DLPE	2	-1	NoDiff	3	-1	TCdM	32	-1	TCdM
Cluster_101607	5	17462873	17463615	24	Intergenic	-	0.190963	AE	10	0.56309	TCM	9	-0.0373615	NIM	57	-0.492207	NIM
Cluster_101608	5	17469887	17470601	24	Intergenic	-	0.722018	NoDiff	40	-1.46414	NoDiff	23	0.937049	NoDiff	55	-2.30617	NoDiff
Cluster_10161	1	92835687	92836185	24	TE	-	0.0296819	AE	37	0.906691	NoDiff	20	0.886111	NoDiff	63	0.947386	NoDiff
Cluster_101610	5	17509902	17510945	24	Intergenic	-	0.584554	DHPE	51	0.495338	NIM	65	0.80795	TCM	217	-0.610002	NoDiff
Cluster_101611	5	17511459	17512518	24	Intergenic	-	-0.0451752	AE	124	-0.670901	NoDiff	94	0.0582526	NoDiff	218	-0.0775421	NoDiff
Cluster_101612	5	17514129	17514385	24	Intergenic	-	-0.0168882	AE	0	-0.0627665	NoDiff	0	0.305406	NoDiff	0	-0.180581	NoDiff
Cluster_101613	5	17514752	17514986	24	Intergenic	-	-0.0457044	AE	0	1.05564	NoDiff	0	0.786676	NoDiff	0	0.0393954	NoDiff
Cluster_101614	5	17515102	17515342	24	Intergenic	-	0.577206	DHPE	0	1.0527	NoDiff	0	1.17376	NoDiff	0	0.80954	NoDiff
Cluster_101615	5	17517125	17517512	24	Intergenic	-	0.050903	AE	24	-1.34388	NoDiff	24	-0.0992792	NoDiff	94	-0.333785	NoDiff
Cluster_101616	5	17517671	17518051	24	TE	-	0.77382	NoDiff	2	0.351394	NoDiff	8	-0.321616	NoDiff	49	-0.832639	TCdM
Cluster_101617	5	17518425	17518939	24	Intergenic	-	-0.014716	AE	29	-0.133953	NoDiff	22	-0.602222	NoDiff	150	-0.960433	TCdM
Cluster_101618	5	17546249	17546429	24	Intergenic	-	-0.70551	DLPE	5	-1.23896	NoDiff	11	-0.57742	NoDiff	52	-0.993455	TCdM
Cluster_10162	1	92851234	92851985	24	Gene body	Zm00001d029895	0.894447	DHPE	0	1.09372	NoDiff	0	1.01975	NoDiff	0	0.972369	NoDiff
Cluster_101620	5	17547453	17548102	24	Intergenic	-	0.670496	DHPE	0	0.948418	NoDiff	0	1.01435	NoDiff	0	0.940682	NoDiff
Cluster_101624	5	17670166	17671169	24	3'-2k	Zm00001d013693	0.467617	AE	101	0.211296	NoDiff	78	1.83639	NoDiff	249	-0.531093	NoDiff
Cluster_10163	1	92853180	92853519	24	3'-2k	Zm00001d029895	-0.367844	NoDiff	16	0.358088	NoDiff	25	0.466645	NoDiff	98	1.72869	NoDiff
Cluster_101630	5	17724054	17724572	24	3'-2k	Zm00001d013694	0.00307934	NoDiff	45	1.78099	NoDiff	13	1.30444	NoDiff	81	-3.42698	NoDiff
Cluster_101631	5	17727085	17727809	24	Intergenic	-	0.381992	AE	31	1.94815	NoDiff	27	-2.55012	NoDiff	172	-0.516108	TCdM
Cluster_101632	5	17728125	17728856	24	Intergenic	-	0.218476	AE	29	-0.462298	NoDiff	24	0.0138534	NoDiff	150	-0.572188	NoDiff
Cluster_101635	5	17804027	17804871	24	5'-2k	Zm00001d013697	0.159551	AE	54	-0.682746	NoDiff	40	-1.5528	NoDiff	274	-0.23999	NIM
Cluster_101636	5	17809550	17810127	24	Gene body	Zm00001d013697	-7.49315	NoDiff	52	2.46727	NoDiff	23	2.6793	NoDiff	168	-1.66295	NoDiff
Cluster_101637	5	17813564	17814224	24	3'-2k	Zm00001d013697	0.139128	AE	55	0.956338	NoDiff	50	1.16347	NoDiff	173	4.65661	NoDiff
Cluster_101638	5	17815049	17815118	24	Intergenic	-	0.745666	NoDiff	0	0	NoDiff	0	0	NoDiff	0	0	NoDiff
Cluster_101639	5	17815978	17816209	24	TE	-	1.75231	NoDiff	0	0.733333	NoDiff	0	0.905882	NoDiff	0	0	NoDiff
Cluster_101641	5	17828367	17828649	24	3'-2k	Zm00001d013698	0.124122	AE	10	1.04969	NoDiff	3	0.969231	NoDiff	1	0	NoDiff
Cluster_101642	5	17829505	17829672	24	3'-2k	Zm00001d013698	-0.173922	AE	0	0	NoDiff	0	0	NoDiff	0	0	NoDiff
Cluster_101643	5	17834380	17834551	24	TE	-	-1	NoDiff	4	-1.95543	NoDiff	28	-0.328203	NIM	41	-1.89089	NoDiff
Cluster_101644	5	17841728	17842035	24	TE	-	2.9878	NoDiff	0	-1	NoDiff	0	-1	NoDiff	0	0	NoDiff
Cluster_101646	5	17852039	17853439	24	Intergenic	-	0.020698	AE	32	0.522753	TCM	36	0.594478	NoDiff	120	0.960537	NoDiff
Cluster_101647	5	17861471	17861712	24	Gene body	Zm00001d013699	-0.712896	DLPE	0	0	NoDiff	0	0	NoDiff	0	0	NoDiff
Cluster_101649	5	17865336	17865571	24	Intergenic	-	1.41371	DHPE	16	-0.364056	NoDiff	4	2.09824	NoDiff	9	0.382179	NIM
Cluster_101652	5	17868236	17868465	24	TE	-	-0.669839	DLPE	10	1.08156	NoDiff	9	1.29138	NoDiff	16	9.47854	NoDiff
Cluster_101653	5	17872737	17873419	24	TE	-	-2.64555	NoDiff	31	1.24615	NoDiff	23	3.57728	NoDiff	163	1.78776	NoDiff
Cluster_101654	5	17874654	17875165	24	TE	-	2.86072	NoDiff	2	-2.77778	NoDiff	27	0.351603	NoDiff	92	1.47453	NoDiff
Cluster_101659	5	17880217	17880836	24	5'-2k	Zm00001d013700	-4.28176	NoDiff	59	-0.519172	NoDiff	40	-0.985158	NoDiff	122	-0.495343	NoDiff
Cluster_10166	1	92880795	92882043	24	Intergenic	-	-7.97105	NoDiff	97	-1.42044	NoDiff	62	2.64265	NoDiff	366	1.06714	NoDiff
Cluster_101661	5	17898676	17899179	24	Intergenic	-	-0.811795	NoDiff	59	4.23112	NoDiff	28	0.568541	NoDiff	87	4.24878	NoDiff
Cluster_101662	5	17899934	17900177	24	Intergenic	-	0.152519	NoDiff	32	2.27284	NoDiff	10	1.0322	NoDiff	21	0.727625	NoDiff
Cluster_101663	5	17900262	17900458	24	Intergenic	-	0.424126	NoDiff	31	1.01496	NoDiff	19	3.06508	NoDiff	50	-0.104792	NoDiff
Cluster_101666	5	17941667	17942552	24	5'-2k	Zm00001d013702	-0.407078	AE	75	-0.842966	NoDiff	45	0.296915	NoDiff	238	0.194845	NIM
Cluster_101667	5	17948600	17949225	24	3'-2k	Zm00001d013702	0.178124	AE	36	-3.07691	NoDiff	47	0.531716	NoDiff	180	-1.2466	NoDiff
Cluster_10167	1	92884380	92884635	24	Intergenic	-	-0.0364862	AE	14	0.62013	NoDiff	13	-0.938179	NoDiff	80	-0.415608	NoDiff
Cluster_101672	5	17961737	17962652	24	Intergenic	-	-0.192537	NoDiff	60	0.0365207	NoDiff	49	-0.572161	NoDiff	106	-0.747729	NoDiff
Cluster_101673	5	17964544	17965339	24	Intergenic	-	0.0418558	NoDiff	20	0.714119	NoDiff	42	-35.1368	NoDiff	199	-0.169789	NoDiff
Cluster_101676	5	18017069	18017669	24	TE	-	1.0742	NoDiff	0	0	NoDiff	0	0	NoDiff	0	0	NoDiff
Cluster_101678	5	18052721	18053804	24	3'-2k	Zm00001d013703	1.0967	NoDiff	64	0.163526	NIM	54	0.735693	NoDiff	305	-1.78542	NoDiff
Cluster_10168	1	92886285	92886449	24	TE	-	0.0546815	AE	12	-2.53037	NoDiff	14	-1.35571	NoDiff	48	18.7755	NoDiff
Cluster_101681	5	18082178	18083495	24	Intergenic	-	0.178569	AE	55	0.234716	NoDiff	36	0.923254	NoDiff	308	0.863651	NoDiff
Cluster_101682	5	18085227	18085464	24	Intergenic	-	-0.044289	AE	4	0.976972	NoDiff	3	1.37974	NoDiff	48	0.732929	NoDiff
Cluster_101683	5	18085585	18086024	24	Intergenic	-	-0.441864	NoDiff	41	0.983067	NoDiff	23	0.270703	NoDiff	101	-0.593291	TCdM
Cluster_101684	5	18151453	18151961	24	Intergenic	-	-0.411276	NoDiff	34	0.0416883	NoDiff	18	1.09618	NoDiff	112	4.49747	TCM
Cluster_101685	5	18152111	18153279	24	Intergenic	-	5.63076	NoDiff	32	-0.254647	NoDiff	26	-0.208727	NoDiff	369	-0.424132	NIM
Cluster_101686	5	18153508	18154005	24	3'-2k	Zm00001d013704	-0.384791	NoDiff	20	-2.70428	NoDiff	28	-0.472585	NoDiff	144	3.72992	NoDiff
Cluster_101687	5	18157104	18157829	24	5'-2k	Zm00001d013705	0.588986	DHPE	85	-0.295584	NoDiff	45	2.99942	NoDiff	172	0.982114	NoDiff
Cluster_101688	5	18161098	18161221	24	Gene body	Zm00001d013705	1.06548	DHPE	0	0	NoDiff	0	0	NoDiff	0	0	NoDiff
Cluster_101689	5	18163659	18164031	24	3'-2k	Zm00001d013705	-1.71228	NoDiff	29	-1.62252	NoDiff	40	0.145631	NoDiff	83	-2.7662	TCdM
Cluster_101690	5	18164637	18164897	24	3'-2k	Zm00001d013705	-0.0481976	AE	19	0.983201	NoDiff	13	0.624664	TCM	61	0.102944	NIM
Cluster_101691	5	18165941	18167374	24	Intergenic	-	-1.20639	NoDiff	143	-0.556786	NoDiff	89	-0.357569	NoDiff	345	-0.254247	NoDiff
Cluster_101692	5	18186916	18187635	24	5'-2k	Zm00001d013706	3.09312	NoDiff	60	-2.83883	NoDiff	71	-0.74453	NoDiff	166	-1.82077	NoDiff
Cluster_101695	5	18191399	18191955	24	Gene body	Zm00001d013706	0.780644	NoDiff	25	0.302797	NoDiff	40	1.09555	NoDiff	126	-0.0671839	NoDiff
Cluster_101696	5	18198791	18199227	24	5'-2k	Zm00001d013707	0.0887414	AE	3	0.333035	NoDiff	7	0.963316	NoDiff	64	0.458924	NIM
Cluster_101697	5	18199776	18199940	24	Intergenic	-	-0.431189	NoDiff	12	-0.843789	NoDiff	14	3.42553	NoDiff	30	1.2178	NoDiff
Cluster_101698	5	18200657	18201120	24	Intergenic	-	1.17843	NoDiff	39	-1.52277	NoDiff	32	17.1191	NoDiff	127	-0.966935	TCdM
Cluster_101699	5	18219467	18219890	24	5'-2k	Zm00001d013708	1.17335	NoDiff	40	1.19273	NoDiff	24	2.94025	NoDiff	91	-8.77023	NoDiff
Cluster_1017	1	7600375	7600681	24	Gene body	Zm00001d027535	-0.378427	AE	0	0.814434	NoDiff	0	0.766644	NoDiff	0	-0.134627	NoDiff
Cluster_10170	1	92895301	92895898	24	5'-2k	Zm00001d029896	-0.41488	NoDiff	36	0.747117	NoDiff	48	1.01325	NoDiff	156	2.63676	NoDiff
Cluster_101700	5	18226904	18228627	24	3'-2k	Zm00001d013709	0.109032	AE	192	0.532021	TCM	157	0.394609	NIM	340	0.792336	NoDiff
Cluster_101701	5	18228858	18229864	24	Intergenic	-	-0.578615	NoDiff	107	-2.19209	NoDiff	44	-0.658889	NoDiff	133	9.84951	NoDiff
Cluster_101704	5	18265475	18266337	24	3'-2k	Zm00001d013712	-0.701585	NoDiff	62	4.60063	NoDiff	67	-0.13277	NoDiff	147	-1.58621	NoDiff
Cluster_101705	5	18272341	18273485	24	5'-2k	Zm00001d013712	0.140175	NoDiff	54	0.636656	NoDiff	93	0.102073	NoDiff	335	-0.215754	NIM
Cluster_101706	5	18273885	18274491	24	5'-2k	Zm00001d013712	4.03317	NoDiff	12	-3.13222	NoDiff	9	-0.819104	TCdM	154	-0.886951	NoDiff
Cluster_101707	5	18276050	18276310	24	Gene body	Zm00001d013713	-0.0783477	NoDiff	8	-2.3327	NoDiff	20	-0.23833	NIM	80	-0.436774	NIM
Cluster_101708	5	18277263	18278997	24	Gene body	Zm00001d013713	-0.742594	NoDiff	128	-11.0292	NoDiff	87	-1.15236	TCdM	388	-0.893111	NoDiff
Cluster_101709	5	18279078	18280293	24	Gene body	Zm00001d013713	-2.11324	NoDiff	37	-0.271152	NoDiff	91	-0.749059	TCdM	336	-0.461083	NoDiff
Cluster_10171	1	92900029	92900640	24	3'-2k	Zm00001d029896	1.51027	DHPE	44	0.99564	NoDiff	43	0.976154	NoDiff	114	-0.543597	NoDiff
Cluster_101710	5	18281634	18281773	24	Gene body	Zm00001d013713	-0.561033	DLPE	4	-0.623575	NoDiff	7	-0.744704	TCdM	38	-0.780911	TCdM
Cluster_101711	5	18281855	18282280	24	Gene body	Zm00001d013713	-0.790115	NoDiff	5	-0.919458	NoDiff	14	-1.07378	NoDiff	110	-0.0666586	NIM
Cluster_101712	5	18282955	18283748	24	Gene body	Zm00001d013713	-4.17781	NoDiff	65	0.528914	TCM	53	0.132712	NIM	145	0.488463	NoDiff
Cluster_101715	5	18301151	18301906	24	TE	-	-0.588912	DLPE	32	0.270591	NoDiff	37	-1.02144	NoDiff	192	-0.944915	NoDiff
Cluster_101716	5	18302049	18302351	24	Intergenic	-	-0.356193	NoDiff	20	0.164258	NoDiff	15	0.732326	NoDiff	77	0.926822	NoDiff
Cluster_101717	5	18303099	18304131	24	3'-2k	Zm00001d013716	0.185651	AE	58	0.879894	TCM	59	0.131388	NIM	267	-0.402824	NoDiff
Cluster_101718	5	18306518	18307255	24	Gene body	Zm00001d013716	0.774047	NoDiff	35	0.475436	NIM	51	0.458272	NoDiff	214	-0.366376	NIM
Cluster_10172	1	92900731	92900961	24	3'-2k	Zm00001d029896	0.602145	NoDiff	14	1.92378	NoDiff	8	1.26375	NoDiff	21	2.82492	NoDiff
Cluster_101720	5	18308903	18309970	24	5'-2k	Zm00001d013716	0.487621	AE	89	1.1877	NoDiff	67	1.65173	NoDiff	273	-0.366585	NoDiff
Cluster_101721	5	18313854	18313965	24	TE	-	0.731881	DHPE	11	-0.67477	TCdM	12	-0.54765	NoDiff	33	3.51208	TCM
Cluster_101722	5	18314798	18315497	24	TE	-	0.606803	DHPE	62	1.07968	NoDiff	35	1.36455	NoDiff	134	1.99709	NoDiff
Cluster_101725	5	18391127	18392006	24	3'-2k	Zm00001d013717	-0.4755	AE	45	0.552081	NoDiff	39	0.89878	NoDiff	257	-0.595095	NoDiff
Cluster_101726	5	18393654	18394022	24	5'-2k	Zm00001d013717	0.0852541	NoDiff	20	1.17691	NoDiff	21	0.373818	NoDiff	50	-0.614649	NoDiff
Cluster_101728	5	18409327	18409932	24	Intergenic	-	0.871821	NoDiff	30	0.50782	TCM	37	5.20942	NoDiff	140	0.361232	NIM
Cluster_101729	5	18410685	18411640	24	5'-2k	Zm00001d013718	9.84147	NoDiff	72	-0.984447	NoDiff	60	0.0171901	NoDiff	261	-0.301043	NoDiff
Cluster_10173	1	92956806	92957078	24	Intergenic	-	1.43049	NoDiff	12	0.920288	NoDiff	13	-0.0764456	NIM	69	-0.12044	NoDiff
Cluster_101730	5	18412660	18414103	24	Gene body	Zm00001d013718	0.772465	NoDiff	154	2.01591	NoDiff	92	0.757784	NoDiff	198	8.33337	NoDiff
Cluster_101733	5	18427564	18428174	24	5'-2k	Zm00001d013719	4.2477	NoDiff	45	7.47448	NoDiff	39	2.31599	NoDiff	141	-0.886949	NoDiff
Cluster_101734	5	18428619	18429128	24	5'-2k	Zm00001d013719	0.173767	NoDiff	30	-1.39773	NoDiff	38	-0.642777	NoDiff	120	-0.820446	NoDiff
Cluster_101735	5	18429942	18432082	24	Gene body	Zm00001d013719	4.11412	NoDiff	133	2.98034	NoDiff	93	0.945276	NoDiff	381	-0.584613	NoDiff
Cluster_101738	5	18468703	18468867	24	TE	-	5.48611	NoDiff	0	0.333333	NoDiff	0	0	NoDiff	0	5.13636	NoDiff
Cluster_101739	5	18473270	18473530	24	TE	-	11.5927	NoDiff	19	0.856322	NoDiff	10	1.00827	NoDiff	41	-0.0903552	NIM
Cluster_10174	1	92960015	92960557	24	Intergenic	-	2.86966	THPE	32	4.41201	NoDiff	61	0.893	TCM	129	-0.360396	NoDiff
Cluster_101740	5	18481249	18481740	24	3'-2k	Zm00001d013720	1.18435	NoDiff	22	0.140842	NoDiff	14	-0.749207	NoDiff	76	-0.882385	NoDiff
Cluster_101741	5	18484100	18484257	24	TE	-	-0.344967	AE	12	2.66388	NoDiff	8	1.28096	NoDiff	17	-0.554065	TCdM
Cluster_101744	5	18533410	18533931	24	5'-2k	Zm00001d013721	-0.588386	NoDiff	1	0.978892	NoDiff	1	0.838483	NoDiff	4	0.154713	NoDiff
Cluster_101748	5	18546534	18547177	24	5'-2k	Zm00001d013722	-0.770854	NoDiff	62	-0.0273246	NoDiff	30	2.63027	NoDiff	157	-0.533034	NoDiff
Cluster_10175	1	92961779	92962450	24	Intergenic	-	0.620706	DHPE	31	0.971792	NoDiff	43	0.79596	NoDiff	206	0.641629	NoDiff
Cluster_101751	5	18564800	18565071	24	TE	-	-0.147824	NoDiff	11	-6.75676	NoDiff	17	0.0721473	NoDiff	46	0	NoDiff
Cluster_101754	5	18573478	18574402	24	TE	-	0.568256	NoDiff	101	0.761528	TCM	86	0.022415	NoDiff	227	-1.48925	TCdM
Cluster_101757	5	18589907	18590224	24	3'-2k	Zm00001d013723	0.872742	NoDiff	22	1.212	NoDiff	17	-0.850731	NoDiff	68	1.30783	TCM
Cluster_101758	5	18591553	18591711	24	3'-2k	Zm00001d013723	1.71757	NoDiff	10	0.72568	NoDiff	8	-17.421	NoDiff	39	-0.732786	NoDiff
Cluster_101759	5	18594017	18594526	24	Gene body	Zm00001d013723	-1.02156	DLPE	12	0.563015	NoDiff	20	1.34837	NoDiff	89	0.820419	TCM
Cluster_101760	5	18595563	18595909	24	5'-2k	Zm00001d013723	0.500869	NoDiff	0	0	NoDiff	0	0	NoDiff	0	0	NoDiff
Cluster_101765	5	18613581	18613767	24	Intergenic	-	0.07355	AE	0	-1	NoDiff	0	-1	NoDiff	0	-1	NoDiff
Cluster_101766	5	18619222	18619876	24	3'-2k	Zm00001d013724	-0.252419	AE	10	-4.08893	NoDiff	10	0.290125	NoDiff	153	0.064986	NIM
Cluster_101769	5	18633826	18634612	24	3'-2k	Zm00001d013725	0.016895	AE	58	1.10347	NoDiff	42	1.1326	NoDiff	200	-0.354141	NoDiff
Cluster_10177	1	92966292	92967256	24	TE	-	-1.35725	NoDiff	51	0.957541	NoDiff	85	0.977673	NoDiff	272	2.17992	NoDiff
Cluster_101770	5	18702760	18703262	24	5'-2k	Zm00001d013727	0.17918	AE	39	1.00689	NoDiff	20	0.873017	NoDiff	34	0.979189	NoDiff
Cluster_101772	5	18708286	18708841	24	Intergenic	-	0.724722	DHPE	34	1.09263	NoDiff	13	1.27879	NoDiff	137	-2.2944	TCdM
Cluster_101773	5	18709168	18710138	24	Intergenic	-	0.355579	AE	80	1.08577	NoDiff	66	1.02486	NoDiff	240	0.231649	NoDiff
Cluster_101774	5	18711256	18711577	24	Intergenic	-	0.957883	DHPE	17	1.05008	NoDiff	10	0.524197	NoDiff	25	0.433446	NoDiff
Cluster_101775	5	18754012	18754415	24	3'-2k	Zm00001d013728	-0.365349	AE	30	1.33021	NoDiff	18	1.39644	NoDiff	63	2.35731	NoDiff
Cluster_101776	5	18757226	18757426	24	3'-2k	Zm00001d013729	-0.274304	NoDiff	0	0	NoDiff	0	0	NoDiff	0	0	NoDiff
Cluster_101779	5	18765878	18766470	24	Gene body	Zm00001d013729	-0.414383	NoDiff	54	-103.46	NoDiff	31	0.0979687	NoDiff	134	-0.0650425	NoDiff
Cluster_101780	5	18816334	18817173	24	Gene body	Zm00001d013730	1.26576	DHPE	37	0.708341	NoDiff	69	-0.0108937	NIM	229	-0.0958647	NoDiff
Cluster_101781	5	18817766	18818458	24	Gene body	Zm00001d013730	5.00006	NoDiff	32	0.197989	NIM	60	-0.0443033	NIM	210	-0.21938	NoDiff
Cluster_101784	5	18819704	18822833	24	Gene body	Zm00001d013730	-0.30624	NoDiff	255	0.852281	NoDiff	366	0.148253	NoDiff	823	0.217908	NoDiff
Cluster_101786	5	18827859	18828403	24	3'-2k	Zm00001d013730	-1.12718	NoDiff	43	-1.17705	NoDiff	25	-0.873947	NoDiff	97	-21.9917	NoDiff
Cluster_101787	5	18848802	18849381	24	Intergenic	-	0.454866	NoDiff	18	0.690203	NoDiff	13	1.12103	NoDiff	53	151.564	NoDiff
Cluster_101791	5	18906362	18906432	24	Intergenic	-	-0.207556	NoDiff	1	20	NoDiff	1	0.599954	NoDiff	16	-0.465939	NoDiff
Cluster_101794	5	18986624	18986746	24	Gene body	Zm00001d013738	2.66918	NoDiff	0	0.219756	NoDiff	0	0.0636364	NoDiff	0	-0.695594	NoDiff
Cluster_101798	5	19015053	19015420	24	3'-2k	Zm00001d013741	0.432044	AE	20	0.529172	NoDiff	28	0.359799	NIM	92	0.154607	NIM
Cluster_10180	1	93035193	93035573	24	Intergenic	-	-0.134813	NoDiff	20	0.977303	NoDiff	42	1.03251	NoDiff	105	0.301357	NoDiff
Cluster_101800	5	19019888	19021888	24	Intergenic	-	0.260623	NoDiff	91	7.12121	NoDiff	103	1.67833	NoDiff	558	-0.494413	NoDiff
Cluster_101801	5	19022353	19022556	24	Intergenic	-	-0.535851	NoDiff	5	0.350359	NoDiff	24	-0.244687	NoDiff	39	-0.280256	NIM
Cluster_101802	5	19023203	19023935	24	Intergenic	-	0.230876	AE	56	0.484198	NoDiff	49	0.461894	NoDiff	114	-0.185088	NoDiff
Cluster_101803	5	19024440	19024972	24	Intergenic	-	-0.204756	AE	74	0.919744	NoDiff	58	18.577	NoDiff	104	-3.6937	NoDiff
Cluster_101804	5	19025499	19026100	24	Intergenic	-	0.122834	AE	46	1.06651	NoDiff	38	1.05295	NoDiff	128	-0.0290354	NoDiff
Cluster_101805	5	19026623	19027021	24	Intergenic	-	-1.55114	NoDiff	20	0.555521	NoDiff	18	-0.684991	NoDiff	102	-1.49419	NoDiff
Cluster_101807	5	19027401	19028087	24	Intergenic	-	1.54623	DHPE	85	0.512739	NoDiff	51	0.679879	NoDiff	175	-0.00849333	NoDiff
Cluster_101809	5	19041878	19042237	24	Intergenic	-	6.72788	NoDiff	54	-2.14514	NoDiff	28	3.10535	NoDiff	83	-0.0102608	NoDiff
Cluster_101812	5	19044812	19045230	24	Intergenic	-	0.264447	AE	91	-1.46983	NoDiff	54	1.21481	TCM	108	0.44921	NIM
Cluster_101813	5	19053528	19053864	24	5'-2k	Zm00001d013743	0.678857	DHPE	20	1.00861	NoDiff	26	2.73047	NoDiff	96	1.00402	NoDiff
Cluster_101814	5	19056889	19057243	24	3'-2k	Zm00001d013743	0.959948	DHPE	0	0.928571	NoDiff	0	1.06703	NoDiff	0	0	NoDiff
Cluster_101815	5	19057459	19057750	24	Intergenic	-	-0.0762811	AE	8	0.0217391	NoDiff	6	0.198389	NoDiff	3	0	NoDiff
Cluster_101819	5	19098054	19098310	24	5'-2k	Zm00001d013744	-0.113737	AE	12	0.215262	NIM	6	-0.344628	NoDiff	79	-0.113097	NIM
Cluster_101821	5	19107163	19107872	24	5'-2k	Zm00001d013745	0.105692	AE	66	0.364835	NoDiff	63	-3.3392	NoDiff	183	-3.50854	NoDiff
Cluster_101822	5	19108003	19109280	24	TE	-	0.357699	NoDiff	33	0.342929	NoDiff	55	-1.03117	NoDiff	120	-0.429623	NoDiff
Cluster_101823	5	19142791	19143265	24	TE	-	-0.87619	NoDiff	71	0.646613	NoDiff	50	-0.0960899	NoDiff	120	-0.748069	NoDiff
Cluster_101824	5	19143359	19143813	24	Intergenic	-	14.0475	NoDiff	24	0.533718	TCM	22	0.37395	NIM	132	-0.264115	NoDiff
Cluster_101825	5	19146594	19146782	24	Intergenic	-	-0.126431	AE	0	0	NoDiff	0	0	NoDiff	0	0	NoDiff
Cluster_101827	5	19149733	19150123	24	Intergenic	-	-1.56965	NoDiff	11	0.92241	NoDiff	9	0.528892	NoDiff	20	0.480434	NoDiff
Cluster_101828	5	19166455	19167101	24	TE	-	-0.24617	AE	10	0.788866	TCM	10	0.660394	TCM	27	0.873348	NoDiff
Cluster_101829	5	19167447	19167925	24	TE	-	-0.387777	AE	22	1.03729	NoDiff	14	0.895151	NoDiff	130	0.827667	NoDiff
Cluster_101831	5	19170871	19171473	24	5'-2k	Zm00001d013746	-0.339984	AE	48	0.0517273	NoDiff	21	-3.44963	NoDiff	128	2.86471	NoDiff
Cluster_101832	5	19175357	19175472	24	3'-2k	Zm00001d013746	-0.407531	AE	0	2.42348	NoDiff	0	2.79599	NoDiff	0	1.46702	NoDiff
Cluster_101833	5	19179839	19180751	24	5'-2k	Zm00001d013747	0.376268	AE	58	1.92671	NoDiff	25	0.289127	NoDiff	250	7.20317	NoDiff
Cluster_101837	5	19206118	19206616	24	Other	-	0.714151	DHPE	33	-1.55016	NoDiff	39	-7.03226	NoDiff	110	-1.62764	NoDiff
Cluster_101840	5	19221996	19222490	24	5'-2k	Zm00001d013750	0.774777	DHPE	32	1.02986	NoDiff	23	1.07783	NoDiff	105	1.02901	NoDiff
Cluster_101841	5	19225679	19226877	24	3'-2k	Zm00001d013750	0.0884968	AE	164	0.378536	NIM	124	-0.228797	NoDiff	263	-7.06356	TCdM
Cluster_101842	5	19227655	19228247	24	TE	-	-1.30997	NoDiff	52	0.604724	NoDiff	31	3.72244	NoDiff	151	7.33032	NoDiff
Cluster_101848	5	19236370	19237071	24	5'-2k	Zm00001d013751	-7.47969	NoDiff	38	-0.540261	NoDiff	19	0.801768	NoDiff	180	1.26853	NoDiff
Cluster_101851	5	19266128	19266399	24	Intergenic	-	0.0498524	NoDiff	10	0.0400481	NoDiff	5	-0.379416	NoDiff	56	0.215489	NIM
Cluster_101853	5	19268567	19268731	24	Intergenic	-	0.0998904	NoDiff	0	0	NoDiff	0	0	NoDiff	0	0	NoDiff
Cluster_101855	5	19274672	19275026	24	TE	-	0.698181	NoDiff	0	0	NoDiff	0	0.103367	NoDiff	0	0	NoDiff
Cluster_101858	5	19284283	19284686	24	TE	-	-0.57104	NoDiff	4	2.09122	NoDiff	5	0.342626	NoDiff	14	-0.14969	NoDiff
Cluster_10186	1	93132314	93133030	24	5'-2k	Zm00001d029898	-0.142004	AE	83	0.395008	NoDiff	78	1.01484	NoDiff	184	-43.0679	NoDiff
Cluster_101860	5	19290898	19291040	24	Intergenic	-	1.44253	NoDiff	2	0.906667	NoDiff	1	1.56211	NoDiff	17	0.843397	NoDiff
Cluster_101861	5	19293564	19294205	24	Intergenic	-	0.519996	NoDiff	7	0.0792562	NoDiff	21	0.903396	TCM	129	-0.244336	NoDiff
Cluster_101865	5	19335069	19335393	24	5'-2k	Zm00001d013752	0.117229	AE	0	-0.0541789	NoDiff	0	-0.0804371	NoDiff	0	0.229962	NoDiff
Cluster_101867	5	19359537	19359683	24	3'-2k	Zm00001d013753	-0.134095	AE	0	1.10036	NoDiff	0	1.2649	NoDiff	0	2.32952	NoDiff
Cluster_101868	5	19415524	19415766	24	Intergenic	-	-0.714949	DLPE	2	-1	NoDiff	3	1.27491	NoDiff	22	-0.912156	NoDiff
Cluster_101869	5	19420669	19420865	24	Intergenic	-	1.32071	DHPE	0	0	NoDiff	0	0	NoDiff	0	0	NoDiff
Cluster_10187	1	93138191	93139421	24	3'-2k	Zm00001d029898	4.04507	NoDiff	81	0.317837	NoDiff	83	0.775561	NoDiff	325	-0.500174	NoDiff
Cluster_101870	5	19421387	19421599	24	Intergenic	-	3.20781	NoDiff	10	1.83956	NoDiff	3	1.99406	NoDiff	29	-1.56125	NoDiff
Cluster_101871	5	19422303	19422693	24	Intergenic	-	0.646159	NoDiff	0	-1.16392	NoDiff	0	-1.01137	NoDiff	0	1.26668	NoDiff
Cluster_101872	5	19462710	19462978	24	Other	-	1.15719	NoDiff	22	1.23808	NoDiff	15	0.426185	NoDiff	83	0.30248	NoDiff
Cluster_101873	5	19464671	19465013	24	3'-2k	Zm00001d013755	-3.99831	NoDiff	21	0.517204	NoDiff	21	0.63987	NoDiff	60	0.0436962	NoDiff
Cluster_101874	5	19465544	19466185	24	3'-2k	Zm00001d013755	-0.347024	AE	72	0.180628	NoDiff	38	0.0725818	NoDiff	185	0.0655309	NoDiff
Cluster_101875	5	19469298	19469856	24	3'-2k	Zm00001d013756	0.306655	AE	21	-0.365525	NoDiff	28	0.558209	TCM	107	-0.105885	NIM
Cluster_101876	5	19520366	19520981	24	5'-2k	Zm00001d013757	0.306114	NoDiff	50	2.42566	NoDiff	30	4.96366	NoDiff	142	-1.43589	NoDiff
Cluster_101878	5	19530697	19531860	24	3'-2k	Zm00001d013757	0.226465	NoDiff	111	-2.37763	NoDiff	78	0.67516	NoDiff	303	0.174695	NoDiff
Cluster_10188	1	93163865	93164284	24	TE	-	298.822	NoDiff	44	1.53172	NoDiff	36	0.181458	NoDiff	86	-1.66731	NoDiff
Cluster_101884	5	19600616	19601192	24	3'-2k	Zm00001d013758	-0.0547183	NoDiff	42	0.309407	NoDiff	31	3.80718	NoDiff	111	610.116	NoDiff
Cluster_101885	5	19601633	19601950	24	3'-2k	Zm00001d013758	0.111706	AE	18	0.537148	TCM	17	0.408203	NIM	99	-0.21532	NIM
Cluster_101886	5	19602906	19604268	24	Intergenic	-	-0.2777	NoDiff	40	-2.15462	NoDiff	44	-5.79766	NoDiff	369	0.620557	TCM
Cluster_101888	5	19605807	19606555	24	3'-2k	Zm00001d013759	-0.433253	AE	74	0.34293	NoDiff	54	1.13879	NoDiff	188	-1.11991	NoDiff
Cluster_101889	5	19608724	19609355	24	5'-2k	Zm00001d013759	0.63824	DHPE	17	0.246243	NoDiff	25	-0.555848	NoDiff	172	2.56858	NoDiff
Cluster_10189	1	93164764	93165427	24	TE	-	57.7729	NoDiff	46	0.465794	NoDiff	52	-0.0354281	NIM	150	-0.812635	NoDiff
Cluster_101890	5	19613861	19614919	24	3'-2k	Zm00001d013761	0.0584399	AE	109	2.41295	NoDiff	57	1.11493	NoDiff	222	-0.0412525	NoDiff
Cluster_101892	5	19654113	19654369	24	3'-2k	Zm00001d013763	2.26656	NoDiff	26	0.612799	NoDiff	17	-0.330221	NoDiff	36	-0.629513	NoDiff
Cluster_101893	5	19654452	19655833	24	3'-2k	Zm00001d013763	5.97084	NoDiff	120	0.252798	NoDiff	73	-0.418845	NIM	271	-0.580154	TCdM
Cluster_101894	5	19658489	19659314	24	3'-2k	Zm00001d013765	-0.061528	AE	43	-0.0807888	NIM	23	0.299669	NoDiff	252	-0.472292	NoDiff
Cluster_101896	5	19665239	19666111	24	5'-2k	Zm00001d013765	1.04216	DHPE	48	10.2838	NoDiff	37	1.16957	NoDiff	222	0.758646	NoDiff
Cluster_101897	5	19666383	19666856	24	5'-2k	Zm00001d013765	0.202038	AE	22	0.781577	NoDiff	35	0.848311	NoDiff	115	0.476297	NIM
Cluster_101898	5	19667328	19668005	24	Intergenic	-	0.348105	AE	120	1.55267	NoDiff	56	1.34318	NoDiff	90	2.6218	NoDiff
Cluster_101899	5	19668273	19668612	24	Intergenic	-	-1.20459	NoDiff	53	1.01862	NoDiff	28	0.922876	NoDiff	36	0.47173	NoDiff
Cluster_1019	1	7657809	7658095	24	Intergenic	-	-0.355058	AE	12	-0.451642	NoDiff	6	-0.060317	NoDiff	86	-0.77221	NoDiff
Cluster_101901	5	19724323	19724572	24	5'-2k	Zm00001d013766	0.43103	NoDiff	33	0.79496	NoDiff	28	1.0857	TCM	42	0.00985453	NoDiff
Cluster_101902	5	19726027	19726920	24	5'-2k	Zm00001d013767	0.450834	AE	85	0.466761	NoDiff	67	0.54346	NoDiff	115	1.73077	NoDiff
Cluster_101906	5	19740837	19741939	24	5'-2k	Zm00001d013768	0.724483	NoDiff	44	0.434408	NoDiff	52	0.455814	NIM	301	-2.69819	NoDiff
Cluster_101907	5	19753611	19755101	24	Intergenic	-	0.646079	DHPE	90	0.180848	NoDiff	66	0.852572	NoDiff	272	0.607436	NoDiff
Cluster_101908	5	19756249	19757522	24	Intergenic	-	0.0368994	AE	84	1.01692	NoDiff	58	0.365634	NIM	309	-0.534603	NoDiff
Cluster_10191	1	93181267	93181486	24	Intergenic	-	16.6436	NoDiff	26	1.68356	NoDiff	18	1.63178	NoDiff	24	4.36899	NoDiff
Cluster_101910	5	19779472	19779588	24	Intergenic	-	0.0971212	AE	26	3.30832	NoDiff	13	0.588802	TCM	27	0.666145	NoDiff
Cluster_101912	5	19783572	19784060	24	3'-2k	Zm00001d013769	1.34251	NoDiff	30	3.10023	NoDiff	24	0.836331	NoDiff	126	-0.933872	NoDiff
Cluster_101913	5	19786950	19787135	24	5'-2k	Zm00001d013770	0.0894427	AE	2	0.825175	NoDiff	36	0.963127	NoDiff	32	0.811356	NoDiff
Cluster_101914	5	19787269	19787698	24	5'-2k	Zm00001d013770	0.263171	AE	35	0.96245	NoDiff	23	1.01959	NoDiff	100	2.7441	NoDiff
Cluster_101915	5	19807297	19807641	24	Intergenic	-	-0.558706	DLPE	10	1.01668	NoDiff	12	1.04995	NoDiff	106	0.306699	NoDiff
Cluster_101917	5	19843768	19843798	24	Intergenic	-	-0.724705	DLPE	6	1.25206	NoDiff	6	3.64228	NoDiff	5	0.316596	NoDiff
Cluster_101919	5	19925252	19925344	24	Gene body	Zm00001d013777	-0.237318	AE	6	-1.31486	NoDiff	14	14.4369	NoDiff	33	4.29033	NoDiff
Cluster_10192	1	93181586	93181837	24	Intergenic	-	-0.39515	AE	17	1.71968	NoDiff	7	3.13095	NoDiff	82	-0.809176	TCdM
Cluster_101920	5	19926609	19927806	24	Gene body	Zm00001d013777	-0.269388	AE	102	1.04294	NoDiff	70	1.17437	NoDiff	314	1.22461	NoDiff
Cluster_101923	5	19935580	19936043	24	Gene body	Zm00001d013778	2.0794	NoDiff	12	1.85892	NoDiff	16	6.69468	NoDiff	154	-0.17272	NoDiff
Cluster_101924	5	19943840	19945720	24	5'-2k	Zm00001d013779	-0.109985	NoDiff	97	0.755455	NoDiff	111	0.844704	NoDiff	502	-1.09047	NoDiff
Cluster_101925	5	19946251	19947093	24	5'-2k	Zm00001d013780	1.93718	NoDiff	30	2.53454	NoDiff	23	-1.47532	NoDiff	235	-0.0911951	NIM
Cluster_101926	5	19953049	19953686	24	5'-2k	Zm00001d013781	-0.0569444	NoDiff	49	-7.71726	NoDiff	35	0.0903436	NoDiff	150	-1.9696	NoDiff
Cluster_101927	5	20022009	20022990	24	5'-2k	Zm00001d013782	-0.317313	NoDiff	40	0.393777	NoDiff	61	0.62898	NoDiff	224	0.805684	NoDiff
Cluster_101929	5	20077587	20078153	24	3'-2k	Zm00001d013784	-0.168347	AE	0	1.03576	NoDiff	0	0.972591	NoDiff	0	0.879541	NoDiff
Cluster_10193	1	93182214	93182846	24	Intergenic	-	0.0849757	NoDiff	45	-0.61345	NoDiff	30	-0.180787	NoDiff	155	-1.20897	TCdM
Cluster_101930	5	20152568	20152986	24	Intergenic	-	-0.903745	DLPE	0	1.00829	NoDiff	0	1.02019	NoDiff	0	0.161734	NoDiff
Cluster_101933	5	20160441	20160938	24	5'-2k	Zm00001d013786	-0.282712	AE	31	1.57955	NoDiff	21	1.3054	NoDiff	109	0.183547	NIM
Cluster_101935	5	20200990	20201135	24	Intergenic	-	1.02461	NoDiff	0	-1	NoDiff	0	-1	NoDiff	0	-1	NoDiff
Cluster_10194	1	93189807	93189997	24	TE	-	-0.0874021	AE	1	1.07947	NoDiff	0	1.30167	NoDiff	0	0.928311	NoDiff
Cluster_101941	5	20259761	20260506	24	Intergenic	-	-0.113929	AE	21	-0.27725	NoDiff	27	-1.23205	NoDiff	100	-0.661867	NoDiff
Cluster_101942	5	20260751	20260966	24	Intergenic	-	0.0384163	NoDiff	11	1.09433	NoDiff	17	10.5011	NoDiff	40	-0.598393	NoDiff
Cluster_101944	5	20265009	20265321	24	3'-2k	Zm00001d013792	-0.324056	AE	0	1.39737	NoDiff	0	-1	NoDiff	0	0.223854	NoDiff
Cluster_101945	5	20267219	20267779	24	5'-2k	Zm00001d013792	0.135769	AE	31	-1.23883	NoDiff	10	-1.14361	NoDiff	51	-0.0397648	NoDiff
Cluster_101946	5	20269241	20269285	24	Intergenic	-	0.107933	AE	10	0.79189	NoDiff	2	0.859905	NoDiff	10	-1	NoDiff
Cluster_101949	5	20302660	20303521	24	Intergenic	-	1.60804	NoDiff	38	26.5281	NoDiff	31	0.363274	NoDiff	50	-2.51766	NoDiff
Cluster_10195	1	93196627	93197976	24	5'-2k	Zm00001d029899	-1.78042	NoDiff	87	0.0442889	NoDiff	64	-1.11203	NoDiff	226	3.13858	NoDiff
Cluster_101950	5	20303602	20303750	24	5'-2k	Zm00001d013793	-0.734197	NoDiff	0	0	NoDiff	0	0	NoDiff	0	0	NoDiff
Cluster_101951	5	20304554	20304767	24	5'-2k	Zm00001d013793	-0.559091	DLPE	23	1.54989	NoDiff	6	0.52097	TCM	34	-10.5502	NoDiff
Cluster_101954	5	20365108	20365589	24	5'-2k	Zm00001d013794	0.576482	NoDiff	25	-0.534431	NoDiff	12	-0.649243	NoDiff	102	-0.20642	NoDiff
Cluster_101955	5	20373450	20373876	24	3'-2k	Zm00001d013796	-0.441606	AE	14	0.519547	NoDiff	28	-0.0918426	NoDiff	123	0.177521	NoDiff
Cluster_101956	5	20395040	20396348	24	Intergenic	-	-0.0620238	NoDiff	82	-3.84894	NoDiff	73	0.146258	NoDiff	363	-0.482139	NoDiff
Cluster_101958	5	20401248	20401734	24	Gene body	Zm00001d013797	-0.44926	AE	14	8.1788	NoDiff	40	3.47378	NoDiff	145	1.20381	NoDiff
Cluster_101959	5	20404392	20404674	24	Gene body	Zm00001d013797	7.28131	NoDiff	14	0.413947	NoDiff	20	0.190281	NoDiff	80	0.759375	NoDiff
Cluster_10196	1	93210831	93211901	24	Intergenic	-	-0.445439	NoDiff	74	-2.55262	NoDiff	53	-70.0538	NoDiff	142	0.698954	NoDiff
Cluster_101961	5	20415007	20415563	24	Gene body	Zm00001d013797	-0.526547	NoDiff	29	3.80175	NoDiff	21	0.33221	NoDiff	15	-1.66017	NoDiff
Cluster_101963	5	20419261	20419660	24	5'-2k	Zm00001d013797	-1.23973	NoDiff	31	-2.03767	NoDiff	25	-1.40225	NoDiff	77	-5.19614	NoDiff
Cluster_101967	5	20471250	20471341	24	Intergenic	-	0.592316	DHPE	8	-6.12377	NoDiff	3	0.170471	NoDiff	19	0.166863	NIM
Cluster_10197	1	93304227	93304666	24	Intergenic	-	-0.761782	NoDiff	34	1.43021	NoDiff	30	0.255586	NoDiff	32	0.889259	NoDiff
Cluster_101970	5	20517253	20518011	24	Intergenic	-	2.6086	NoDiff	47	3.8247	NoDiff	48	-1.03338	NoDiff	264	1.21276	NoDiff
Cluster_101971	5	20518298	20518915	24	Intergenic	-	1.39845	NoDiff	34	-0.122375	NoDiff	42	-1.16327	NoDiff	201	-1.26199	NoDiff
Cluster_101972	5	20530943	20531096	24	Gene body	Zm00001d013798	-0.255341	AE	17	8.65655	NoDiff	9	1.08067	NoDiff	43	0.181778	NIM
Cluster_101975	5	20538487	20539272	24	Gene body	Zm00001d013798	8.87856	NoDiff	54	1.08747	NoDiff	56	1.94904	TCM	231	-1.67677	NoDiff
Cluster_101976	5	20540163	20540545	24	Gene body	Zm00001d013798	-1.45262	NoDiff	11	-1.7832	NoDiff	23	-0.368122	NoDiff	80	-0.902773	NoDiff
Cluster_101977	5	20554521	20554894	24	Gene body	Zm00001d013798	2.26167	NoDiff	14	0.623127	NoDiff	22	0.45545	NoDiff	114	-0.0888256	NoDiff
Cluster_101978	5	20556891	20557485	24	Gene body	Zm00001d013798	-0.107281	NoDiff	8	1.12217	NoDiff	8	-2.56795	NoDiff	104	-0.156077	NoDiff
Cluster_10198	1	93307225	93308298	24	Intergenic	-	-0.0567353	AE	43	0.110783	NoDiff	34	0.134304	NoDiff	194	-0.455974	NIM
Cluster_101982	5	20574296	20574682	24	Gene body	Zm00001d013798	1.9097	NoDiff	5	1.36169	NoDiff	9	0.0155856	NoDiff	56	-1.40827	NoDiff
Cluster_101983	5	20576622	20577434	24	5'-2k	Zm00001d013798	0.611492	NoDiff	35	2.29554	NoDiff	68	0.351888	NoDiff	243	-0.222412	NoDiff
Cluster_101984	5	20587888	20588053	24	Intergenic	-	-0.065645	AE	15	0.957556	NoDiff	5	-1.27654	NoDiff	53	-1.12709	NoDiff
Cluster_101985	5	20610102	20610755	24	5'-2k	Zm00001d013799	-0.650335	NoDiff	36	3.01833	NoDiff	27	3.98661	NoDiff	178	-0.298657	NIM
Cluster_101987	5	20652156	20652193	24	Intergenic	-	0.515635	DHPE	0	0	NoDiff	0	2.86667	NoDiff	0	-0.137931	NoDiff
Cluster_101988	5	20688620	20688910	24	Intergenic	-	0.17474	AE	17	-0.740899	NoDiff	12	-0.207682	NoDiff	29	-0.993034	TCdM
Cluster_101989	5	20690953	20691196	24	Intergenic	-	0.684053	NoDiff	0	1.36807	TCM	0	2.85155	NoDiff	0	0.833333	NoDiff
Cluster_10199	1	93309456	93309811	24	Intergenic	-	0.396909	AE	0	0.81123	NoDiff	0	0.976119	NoDiff	0	5.6733	NoDiff
Cluster_101993	5	20773171	20773747	24	TE	-	-0.142416	NoDiff	10	5.61497	NoDiff	3	1	NoDiff	2	0	NoDiff
Cluster_101994	5	20785140	20785218	24	Other	-	1.2997	NoDiff	3	-2.01534	TCdM	2	0.754338	NoDiff	7	-3.25118	TCdM
Cluster_101996	5	20788995	20789514	24	Intergenic	-	-0.371088	NoDiff	23	-0.00525106	NoDiff	13	-0.307815	NoDiff	87	-0.742038	TCdM
Cluster_102	1	435930	437059	24	TE	-	0.371098	AE	25	0.819366	TCM	18	0.176367	NIM	47	-1.16878	NoDiff
Cluster_10200	1	93315093	93315418	24	TE	-	5.02685	NoDiff	0	1.03049	NoDiff	0	1.09159	NoDiff	0	0.147888	NoDiff
Cluster_102004	5	20822976	20823294	24	3'-2k	Zm00001d013802	-0.679648	NoDiff	0	1.30751	NoDiff	0	1.11815	NoDiff	0	-0.142261	NoDiff
Cluster_102008	5	20949849	20949996	24	Intergenic	-	8.10376	NoDiff	1	0.590909	NoDiff	0	0	NoDiff	10	-1.54699	NoDiff
Cluster_102009	5	20950247	20950963	24	Intergenic	-	-0.13703	AE	0	0.944794	NoDiff	0	0.799681	NoDiff	0	3.48045	NoDiff
Cluster_102011	5	20976873	20977264	24	TE	-	0.179909	AE	0	1.08001	NoDiff	0	0.99773	NoDiff	0	0.289208	NoDiff
Cluster_102012	5	20977811	20978071	24	TE	-	0.447471	NoDiff	3	1.01112	NoDiff	0	0.594716	NoDiff	12	0.468647	NIM
Cluster_102013	5	20978204	20978537	24	TE	-	0.520798	DHPE	0	0.92634	NoDiff	0	0.643762	NoDiff	0	0.487411	NIM
Cluster_102015	5	20979025	20979240	24	TE	-	-0.437455	AE	0	0.470757	NoDiff	0	0.416913	NoDiff	0	-0.213943	NoDiff
Cluster_102016	5	20979394	20979647	24	TE	-	0.349364	AE	0	-0.0633444	NoDiff	0	0.361497	NoDiff	0	-0.36396	NoDiff
Cluster_102017	5	20980440	20981266	24	5'-2k	Zm00001d013804	-0.197189	AE	0	0.947007	NoDiff	0	0.83796	NoDiff	0	-0.104747	NoDiff
Cluster_102018	5	20981632	20981794	24	5'-2k	Zm00001d013804	-0.63169	DLPE	0	-0.0907978	NoDiff	0	0.517539	NoDiff	0	0.353149	NoDiff
Cluster_102019	5	20987611	20988133	24	3'-2k	Zm00001d013804	-4.92599	NoDiff	40	12.4131	NoDiff	34	0.820144	NoDiff	133	-0.982522	TCdM
Cluster_10202	1	93423375	93424252	24	5'-2k	Zm00001d029903	-0.213473	AE	70	0.832452	TCM	49	1.11084	NoDiff	185	-6.34263	NoDiff
Cluster_102022	5	21056060	21056844	24	Intergenic	-	0.0341148	NoDiff	106	4.5022	NoDiff	44	2.24192	NoDiff	122	-10.7166	NoDiff
Cluster_10203	1	93426246	93426679	24	3'-2k	Zm00001d029903	-0.385907	NoDiff	26	-114.37	NoDiff	49	-0.561579	NoDiff	109	-1.19741	NoDiff
Cluster_102031	5	21066401	21068289	24	Intergenic	-	-1.68426	NoDiff	144	3.65408	NoDiff	87	2.46451	NoDiff	479	-0.840885	NoDiff
Cluster_102032	5	21068463	21068722	24	Intergenic	-	0.561024	DHPE	0	0.0019736	NoDiff	0	0.0668858	NoDiff	0	-0.214413	NoDiff
Cluster_102033	5	21072150	21072520	24	3'-2k	Zm00001d013806	-0.00467801	NoDiff	27	-0.364469	NoDiff	29	-4.63421	NoDiff	56	-0.140122	NIM
Cluster_102037	5	21100550	21100678	24	TE	-	0.441911	AE	0	0.0692261	NoDiff	0	0.10597	NoDiff	0	-1	NoDiff
Cluster_102039	5	21101084	21102012	24	Intergenic	-	-0.53649	DLPE	28	0.411663	NIM	18	1.03003	NoDiff	123	-2.35057	NoDiff
Cluster_102040	5	21102673	21103016	24	TE	-	0.766262	DHPE	14	0.0122969	NoDiff	8	-1.73313	NoDiff	104	-2.87337	NoDiff
Cluster_102041	5	21103483	21104307	24	TE	-	1.02649	DHPE	0	1.02445	NoDiff	0	0.890382	NoDiff	0	0.199714	NoDiff
Cluster_102042	5	21110581	21111387	24	Intergenic	-	0.323476	AE	12	0.409086	NIM	6	-0.0819604	NoDiff	51	-0.508521	TCdM
Cluster_102043	5	21115541	21115774	24	Intergenic	-	1.66176	NoDiff	3	1.00471	NoDiff	3	0.577544	NoDiff	2	2.82488	NoDiff
Cluster_102044	5	21118671	21119635	24	Intergenic	-	0.550736	DHPE	0	0.966498	NoDiff	0	0.896233	NoDiff	0	0.62886	NoDiff
Cluster_102045	5	21119845	21120442	24	5'-2k	Zm00001d013809	-0.37026	AE	0	0.983802	NoDiff	0	1.06632	TCM	0	-0.988254	NoDiff
Cluster_102046	5	21120517	21120758	24	5'-2k	Zm00001d013809	-0.0247477	AE	4	0.88882	NoDiff	2	0.825889	NoDiff	10	0.613033	NoDiff
Cluster_102047	5	21122375	21123003	24	Gene body	Zm00001d013809	-0.0350291	AE	0	1.18925	NoDiff	0	0.828938	NoDiff	0	0.429723	NoDiff
Cluster_102048	5	21123782	21124300	24	Gene body	Zm00001d013809	0.046713	AE	0	0.942238	NoDiff	0	0.774583	NoDiff	0	0.558881	NoDiff
Cluster_102049	5	21127753	21128677	24	3'-2k	Zm00001d013809	0.639197	DHPE	37	-0.00510958	NoDiff	57	1.30175	NoDiff	268	0.16745	NoDiff
Cluster_10205	1	93435609	93436235	24	TE	-	1.18746	NoDiff	35	-0.226699	NIM	26	-0.463943	NIM	64	-3.84812	NoDiff
Cluster_102050	5	21130324	21130895	24	Intergenic	-	-0.360749	AE	24	0.115465	NoDiff	14	16.1379	NoDiff	176	2.35606	NoDiff
Cluster_102053	5	21144468	21144723	24	Intergenic	-	0.373883	NoDiff	7	-0.986308	NoDiff	11	-0.00733061	NIM	76	2.41681	TCM
Cluster_102054	5	21182075	21182246	24	5'-2k	Zm00001d013810	0.0930456	NoDiff	0	-1	NoDiff	0	0	NoDiff	0	0	NoDiff
Cluster_102055	5	21189075	21189716	24	5'-2k	Zm00001d013811	-5.82038	NoDiff	20	1.10082	NoDiff	7	-0.275623	NoDiff	36	-1.14131	NoDiff
Cluster_102057	5	21201119	21201337	24	Gene body	Zm00001d013811	-0.224183	AE	0	0.0668202	NoDiff	0	0.705037	NoDiff	0	-0.312858	NoDiff
Cluster_102058	5	21202019	21202123	24	3'-2k	Zm00001d013811	0.171808	AE	1	0.874522	NoDiff	0	0.74776	NoDiff	3	0.666517	NoDiff
Cluster_102059	5	21202563	21203179	24	3'-2k	Zm00001d013811	-0.501924	DLPE	54	0.0687162	NIM	48	0.744872	NoDiff	129	1.78354	NoDiff
Cluster_102062	5	21287163	21287962	24	Gene body	Zm00001d013812	2.68659	NoDiff	0	0.988913	NoDiff	0	1.04416	NoDiff	0	-0.243377	NoDiff
Cluster_102063	5	21289294	21289716	24	Gene body	Zm00001d013812	13.0624	THPE	0	0.801776	NoDiff	0	0.659864	NoDiff	0	2.0192	NoDiff
Cluster_102064	5	21290200	21290720	24	Gene body	Zm00001d013812	-1.65579	NoDiff	17	-0.513545	NoDiff	25	0.00214655	NIM	93	0.321449	NoDiff
Cluster_102065	5	21294713	21294972	24	3'-2k	Zm00001d013812	-1.34628	NoDiff	0	-1	NoDiff	0	-1	NoDiff	0	-1	NoDiff
Cluster_10207	1	93440388	93440812	24	TE	-	-0.287408	AE	37	0.0501232	NoDiff	30	0.0107674	NoDiff	68	2.47271	NoDiff
Cluster_102070	5	21328709	21329621	24	3'-2k	Zm00001d013817	-0.130466	AE	41	2.349	NoDiff	27	0.31803	NIM	202	-14.6208	NoDiff
Cluster_102071	5	21332196	21332713	24	Intergenic	-	-0.120067	NoDiff	9	-0.0267705	NoDiff	4	0.893923	NoDiff	17	1.39124	NoDiff
Cluster_102072	5	21349566	21349761	24	Intergenic	-	0.720013	DHPE	0	-1.07692	NoDiff	0	-0.720911	NoDiff	0	-0.949387	NoDiff
Cluster_102073	5	21349842	21350235	24	Intergenic	-	-0.0338919	AE	41	0.874921	NoDiff	30	0.470952	NoDiff	82	0.171866	NIM
Cluster_102074	5	21350882	21351329	24	Intergenic	-	0.921694	NoDiff	62	0.804502	NoDiff	30	-0.269574	NoDiff	117	-0.632636	NoDiff
Cluster_102076	5	21385434	21385834	24	Intergenic	-	-0.75821	DLPE	0	6.66885	NoDiff	1	2.3877	NoDiff	3	7.99766	NoDiff
Cluster_102079	5	21425651	21425701	24	3'-2k	Zm00001d013820	2.9383	NoDiff	0	0	NoDiff	0	0	NoDiff	0	0	NoDiff
Cluster_102085	5	21439467	21440035	24	5'-2k	Zm00001d013821	-0.578316	NoDiff	12	1.88059	NoDiff	5	1.08348	NoDiff	14	1.24306	NoDiff
Cluster_10209	1	93447663	93448192	24	Intergenic	-	-0.156035	NoDiff	33	0.785265	NoDiff	33	-0.140316	NoDiff	146	-0.372296	NoDiff
Cluster_102090	5	21468872	21469064	24	Intergenic	-	0.401051	AE	0	0	NoDiff	0	0	NoDiff	0	0	NoDiff
Cluster_102092	5	21491057	21491230	24	3'-2k	Zm00001d013824	0.606982	DHPE	0	0	NoDiff	0	0	NoDiff	0	0	NoDiff
Cluster_102094	5	21492553	21492813	24	5'-2k	Zm00001d013825	-0.399674	AE	0	0.85039	NoDiff	0	0.826038	NoDiff	0	-0.515246	NoDiff
Cluster_102095	5	21494669	21494942	24	3'-2k	Zm00001d013825	-0.0199947	AE	0	-0.183698	NoDiff	0	-0.0873266	NoDiff	0	-0.575465	NoDiff
Cluster_102096	5	21495780	21495992	24	3'-2k	Zm00001d013825	-0.279093	NoDiff	0	0	NoDiff	0	0	NoDiff	0	0	NoDiff
Cluster_102097	5	21505219	21505375	24	Gene body	Zm00001d013827	-0.359492	AE	0	0	NoDiff	0	0	NoDiff	0	0	NoDiff
Cluster_1021	1	7660392	7660804	24	Intergenic	-	0.43093	AE	36	-0.348773	NoDiff	28	-0.878952	NoDiff	38	-5.4434	TCdM
Cluster_102109	5	21552458	21553158	24	Gene body	Zm00001d013828	1.49767	NoDiff	60	0.0520113	NoDiff	64	0.582501	TCM	188	-1.49232	NoDiff
Cluster_10211	1	93516465	93516735	24	Intergenic	-	-0.485267	NoDiff	17	0.854899	NoDiff	11	0.78424	NoDiff	20	0.368951	NoDiff
Cluster_102111	5	21562559	21563259	24	Gene body	Zm00001d013828	-1.24574	NoDiff	19	-2.76242	NoDiff	36	0.445518	NIM	137	7.58563	NoDiff
Cluster_102112	5	21571219	21571616	24	Intergenic	-	-1.54728	NoDiff	3	0.0179136	NoDiff	6	0.118987	NIM	5	0	NoDiff
Cluster_102114	5	21695700	21695931	24	TE	-	-0.0423843	AE	17	0.383342	NoDiff	10	-1.44955	NoDiff	18	2.73899	NoDiff
Cluster_102115	5	21743103	21743358	24	TE	-	0.386041	AE	9	0.597249	TCM	12	0.0585722	NoDiff	36	0.155705	NoDiff
Cluster_102117	5	21806584	21807092	24	Intergenic	-	-0.598924	NoDiff	24	17.1646	NoDiff	6	4.85858	NoDiff	28	-0.946006	TCdM
Cluster_102118	5	21834276	21834634	24	5'-2k	Zm00001d013829	3.40819	NoDiff	12	-0.0859687	NIM	8	-0.124908	NIM	40	-0.874829	TCdM
Cluster_10212	1	93517290	93517415	24	TE	-	0.18571	AE	0	0	NoDiff	0	0	NoDiff	0	0	NoDiff
Cluster_102124	5	21881384	21882223	24	5'-2k	Zm00001d013830	-0.540156	DLPE	90	0.52605	NoDiff	40	0.244627	NIM	166	-0.661047	NoDiff
Cluster_102125	5	21882835	21883318	24	5'-2k	Zm00001d013830	0.880629	NoDiff	0	0	NoDiff	0	0	NoDiff	0	0	NoDiff
Cluster_102126	5	21884990	21885284	24	Gene body	Zm00001d013830	0.598678	DHPE	20	-0.855719	NoDiff	18	-3.85053	NoDiff	44	-0.499257	NoDiff
Cluster_102127	5	21896453	21896794	24	TE	-	0.141156	AE	0	1.55656	NoDiff	3	0.865694	NoDiff	37	1.00887	NoDiff
Cluster_102128	5	21904103	21904397	24	TE	-	0.33897	AE	0	0.521158	NoDiff	0	0.773266	NoDiff	0	-0.0206387	NoDiff
Cluster_102129	5	21905127	21905548	24	5'-2k	Zm00001d013834	-0.173654	AE	0	0.858269	NoDiff	0	1.12384	NoDiff	0	0.874446	NoDiff
Cluster_102130	5	21908821	21909226	24	3'-2k	Zm00001d013834	-0.130295	NoDiff	19	0.249278	NoDiff	18	-27.3408	NoDiff	64	0.569772	NoDiff
Cluster_102131	5	21909570	21910514	24	3'-2k	Zm00001d013834	-0.461514	AE	55	1.44979	NoDiff	39	0.480818	NoDiff	209	-0.11356	NIM
Cluster_102132	5	21954652	21954949	24	Gene body	Zm00001d013835	-1.33485	NoDiff	14	5.54676	NoDiff	23	-0.602689	NoDiff	87	7.41966	NoDiff
Cluster_102133	5	21955163	21955443	24	3'-2k	Zm00001d013836	-0.690911	NoDiff	8	0.342921	NoDiff	3	0.660876	NoDiff	58	0.515546	TCM
Cluster_102135	5	21960490	21960840	24	Gene body	Zm00001d013836	1.30518	NoDiff	11	0.0480133	NoDiff	17	0.368343	NoDiff	112	-0.896755	NoDiff
Cluster_102136	5	21961433	21962176	24	Gene body	Zm00001d013836	-0.194154	AE	42	0.465983	NIM	74	-0.034769	NIM	178	0.0825761	NoDiff
Cluster_102139	5	21974567	21977406	24	Gene body	Zm00001d013836	-0.314612	NoDiff	151	-3.78002	NoDiff	100	-2.83394	NoDiff	394	-0.378248	NoDiff
Cluster_102140	5	21986140	21986839	24	TE	-	1.6261	NoDiff	32	1.5775	NoDiff	34	1.74342	NoDiff	223	-0.0332292	NoDiff
Cluster_102141	5	21987884	21989084	24	TE	-	0.873368	NoDiff	64	-4.98228	NoDiff	34	-11.9436	NoDiff	314	-0.170438	NoDiff
Cluster_102142	5	21989937	21990561	24	TE	-	0.588602	DHPE	28	0.845489	NoDiff	22	0.734201	NoDiff	98	-0.169698	NoDiff
Cluster_10215	1	93541653	93541761	24	Intergenic	-	0.196981	AE	12	-0.0992243	NIM	12	-0.332012	NIM	28	0	NoDiff
Cluster_102152	5	22080851	22081198	24	TE	-	0.816909	NoDiff	4	-6112.4	NoDiff	6	-27.6358	NoDiff	73	0.633999	NoDiff
Cluster_102154	5	22088310	22089182	24	TE	-	-0.432342	NoDiff	97	-1.12594	NoDiff	40	-0.358003	NoDiff	134	-2.03981	NoDiff
Cluster_102155	5	22091779	22092508	24	3'-2k	Zm00001d013838	-0.412126	NoDiff	19	0.293507	NoDiff	13	-0.412419	NIM	242	-0.617154	NoDiff
Cluster_102156	5	22100582	22102073	24	5'-2k	Zm00001d013839	0.212285	AE	134	15.0128	NoDiff	78	7.9053	NoDiff	190	0.143461	NIM
Cluster_102159	5	22108546	22109697	24	5'-2k	Zm00001d013840	0.622574	NoDiff	52	-0.303599	NoDiff	28	-0.420996	NIM	210	5.68444	NoDiff
Cluster_102167	5	22252025	22252258	24	Intergenic	-	0.333903	AE	18	1.84079	TCM	10	1.479	NoDiff	20	14.8485	NoDiff
Cluster_102168	5	22253059	22253674	24	Intergenic	-	1.46091	NoDiff	63	5.05724	NoDiff	31	1.19727	NoDiff	138	0.735473	NoDiff
Cluster_102172	5	22332050	22332438	24	Intergenic	-	-0.267938	AE	13	-0.616028	NoDiff	13	-0.936918	NoDiff	24	-0.25132	NIM
Cluster_102173	5	22361114	22361426	24	Intergenic	-	0.104631	AE	0	0.858573	NoDiff	0	0.336054	NoDiff	0	-2.08595	NoDiff
Cluster_102174	5	22361782	22362016	24	Intergenic	-	-0.371619	NoDiff	0	0	NoDiff	0	0	NoDiff	0	0	NoDiff
Cluster_102176	5	22368863	22369187	24	Intergenic	-	-1.55194	NoDiff	0	0	NoDiff	0	0	NoDiff	0	0	NoDiff
Cluster_102179	5	22387834	22389280	24	3'-2k	Zm00001d013845	5.96243	NoDiff	77	0.233526	NIM	73	0.423506	NIM	365	-0.608334	NoDiff
Cluster_10218	1	93726702	93727807	24	Intergenic	-	0.00432514	AE	83	1.04957	NoDiff	33	4.63327	NoDiff	161	-3.66149	NoDiff
Cluster_102182	5	22407349	22407771	24	Gene body	Zm00001d013845	1.9787	NoDiff	20	0.98675	NoDiff	23	0.943276	NoDiff	50	0.349709	NoDiff
Cluster_102184	5	22409881	22410168	24	Gene body	Zm00001d013845	-0.968556	DLPE	27	1.03642	NoDiff	14	1.46178	NoDiff	14	0	NoDiff
Cluster_102186	5	22411091	22412955	24	Gene body	Zm00001d013845	1.69	DHPE	58	0.192234	NoDiff	90	0.0108107	NIM	579	-0.858854	NoDiff
Cluster_102189	5	22443192	22443373	24	Other	-	1.6262	DHPE	3	0	NoDiff	16	0.0571152	NoDiff	53	1.42625	NoDiff
Cluster_10219	1	93729104	93729581	24	Intergenic	-	-0.254333	AE	67	0.785362	NoDiff	37	0.0518959	NoDiff	91	-2.79287	NoDiff
Cluster_102191	5	22446985	22447261	24	Intergenic	-	-0.444243	AE	3	-1.48728	NoDiff	2	0.634806	NoDiff	21	0.414648	NoDiff
Cluster_102192	5	22447737	22448064	24	Intergenic	-	-0.598025	DLPE	0	0.904008	NoDiff	0	0.908154	NoDiff	0	-0.754788	NoDiff
Cluster_102193	5	22453288	22454291	24	Intergenic	-	-0.249159	NoDiff	59	-0.434248	NIM	33	-0.151432	NoDiff	211	-0.323424	NIM
Cluster_102196	5	22473225	22473864	24	TE	-	-0.188795	AE	33	-0.356018	NoDiff	24	-0.64104	NoDiff	67	-0.165457	NIM
Cluster_102197	5	22474368	22475074	24	Intergenic	-	-0.936729	DLPE	47	0.242463	NoDiff	35	1.74762	NoDiff	165	-0.585198	NoDiff
Cluster_102198	5	22494980	22495654	24	Intergenic	-	-0.725595	NoDiff	26	0.419524	NoDiff	47	0.635602	TCM	187	-0.818942	NoDiff
Cluster_10220	1	93749996	93750311	24	3'-2k	Zm00001d029910	-0.181625	NoDiff	0	1.00549	NoDiff	1	0.938748	NoDiff	3	0.693675	NoDiff
Cluster_102200	5	22496237	22496540	24	5'-2k	Zm00001d013847	-1.87332	NoDiff	9	-2.79049	NoDiff	11	-8.385	NoDiff	79	-0.786295	NoDiff
Cluster_102201	5	22501355	22502352	24	Gene body	Zm00001d013847	0.0857273	NoDiff	52	0.143833	NoDiff	43	8.44013	NoDiff	266	-1.29756	NoDiff
Cluster_102205	5	22506566	22508287	24	TE	-	-8.40096	NoDiff	172	1.94761	NoDiff	94	0.828092	NoDiff	307	-0.130052	NIM
Cluster_102206	5	22508494	22508881	24	Intergenic	-	0.0217041	AE	40	0.891265	NoDiff	33	0.929817	NoDiff	65	1.07577	NoDiff
Cluster_102208	5	22524106	22524491	24	TE	-	0.81926	NoDiff	14	1.42479	NoDiff	17	-7.77673	NoDiff	118	-0.813715	NoDiff
Cluster_102209	5	22530633	22531393	24	TE	-	1.55658	NoDiff	25	-0.317874	NoDiff	51	-0.220001	NoDiff	236	0.071872	NoDiff
Cluster_10221	1	93750520	93751148	24	3'-2k	Zm00001d029910	2.54794	NoDiff	23	0.801048	NoDiff	19	0.264815	NoDiff	26	-0.730828	NoDiff
Cluster_102210	5	22531879	22532162	24	TE	-	0.860653	NoDiff	16	-2.16819	NoDiff	21	-1.94942	NoDiff	77	-88.8627	NoDiff
Cluster_102211	5	22532248	22532848	24	TE	-	13.5093	NoDiff	62	-0.063113	NoDiff	41	-5.97712	NoDiff	141	-13.6242	NoDiff
Cluster_102212	5	22533047	22533619	24	Intergenic	-	0.557387	NoDiff	33	1.85905	NoDiff	23	2.04978	NoDiff	138	0.90663	TCM
Cluster_102213	5	22534612	22534954	24	Intergenic	-	-0.0835336	AE	16	8.30533	NoDiff	15	0.361263	NoDiff	89	-0.847369	NoDiff
Cluster_102214	5	22543617	22544074	24	TE	-	-0.0656924	AE	10	0.446604	NoDiff	6	-0.00679973	NoDiff	7	-21.9645	NoDiff
Cluster_102215	5	22544350	22544574	24	Intergenic	-	-0.23111	AE	17	-2.15595	NoDiff	3	-0.307403	NoDiff	21	-0.503866	NoDiff
Cluster_102216	5	22545784	22545970	24	Intergenic	-	0.152007	AE	0	0.855936	NoDiff	0	0.756881	NoDiff	6	0.515415	NoDiff
Cluster_102217	5	22546568	22547066	24	Intergenic	-	-0.0937816	NoDiff	18	0.668703	NoDiff	24	0.325363	NoDiff	134	-0.367836	NoDiff
Cluster_10222	1	93755461	93755724	24	Intergenic	-	-0.724746	DLPE	6	-1	NoDiff	12	-0.674963	TCdM	55	-0.931558	TCdM
Cluster_102225	5	22603677	22604273	24	TE	-	-0.308895	AE	41	0.693743	TCM	26	0.92585	TCM	76	1.15897	NoDiff
Cluster_102226	5	22604500	22605058	24	TE	-	0.94988	NoDiff	30	1.05757	NoDiff	35	0.851925	TCM	155	1.29729	NoDiff
Cluster_102229	5	22622872	22623190	24	TE	-	0.355907	NoDiff	8	-3.16711	NoDiff	6	0.396866	NoDiff	33	-1.47074	NoDiff
Cluster_10223	1	93756219	93757238	24	Intergenic	-	-0.637813	DLPE	44	-0.112168	NIM	42	-0.253072	NIM	272	-0.465831	NoDiff
Cluster_102230	5	22659991	22660465	24	TE	-	0.231557	AE	11	5.62556	NoDiff	11	-0.775199	NoDiff	33	-5.17686	NoDiff
Cluster_102231	5	22663078	22663389	24	TE	-	0.220934	NoDiff	0	0.0301286	NoDiff	0	1.43866	NoDiff	0	12.55	NoDiff
Cluster_102232	5	22663766	22664491	24	TE	-	0.179203	AE	6	2.31721	NoDiff	5	-0.414358	NoDiff	25	0.488842	NoDiff
Cluster_102233	5	22689955	22690226	24	TE	-	-0.488311	AE	0	0.938687	NoDiff	0	1.00628	NoDiff	0	1.11658	NoDiff
Cluster_102235	5	22695127	22695630	24	Other	-	0.0827678	AE	11	0.239592	NoDiff	9	-4.62655	NoDiff	12	-1.89604	NoDiff
Cluster_102236	5	22695754	22698058	24	TE	-	-0.00640431	AE	0	0.98263	NoDiff	0	0.84305	NoDiff	0	0.169088	NoDiff
Cluster_102238	5	22701655	22701827	24	Intergenic	-	-0.156211	AE	0	0.959832	NoDiff	0	0.862017	NoDiff	0	2.60593	NoDiff
Cluster_10224	1	93784708	93785239	24	Other	-	-0.15063	AE	44	-0.188714	NoDiff	31	-0.934821	NoDiff	156	-1.58123	NoDiff
Cluster_102241	5	22705925	22706110	24	Gene body	Zm00001d013850	0.803466	DHPE	0	1.27454	NoDiff	0	1.63883	NoDiff	0	0.434095	NoDiff
Cluster_102242	5	22728453	22729022	24	5'-2k	Zm00001d013854	0.244976	NoDiff	0	0.898736	NoDiff	0	0.994415	NoDiff	0	0.698356	NoDiff
Cluster_102246	5	22769455	22770184	24	5'-2k	Zm00001d013855	0.240289	AE	0	0.78027	NoDiff	0	0.875196	NoDiff	0	0.275996	NoDiff
Cluster_102247	5	22770766	22771533	24	5'-2k	Zm00001d013855	0.622403	NoDiff	23	0.612085	TCM	12	0.15242	NoDiff	38	-0.974056	TCdM
Cluster_102249	5	22799582	22799956	24	Gene body	Zm00001d013856	0.508171	DHPE	37	1.00162	NoDiff	11	1.12943	NoDiff	78	0.887521	NoDiff
Cluster_10225	1	93787154	93787414	24	Other	-	-0.790706	NoDiff	40	0.237264	NIM	21	-0.0740113	NoDiff	45	1.46089	NoDiff
Cluster_102250	5	22801029	22801527	24	5'-2k	Zm00001d013856	0.380329	AE	24	1.06318	NoDiff	11	1.19217	NoDiff	107	0.950567	NoDiff
Cluster_102251	5	22802037	22802512	24	TE	-	0.329002	AE	24	0.72449	NoDiff	13	0.781906	NoDiff	146	0.470887	NoDiff
Cluster_102252	5	22802603	22803060	24	TE	-	-0.427682	AE	22	0.923353	NoDiff	65	0.899265	NoDiff	105	0.787016	NoDiff
Cluster_102254	5	22834031	22834269	24	Intergenic	-	0.766711	DHPE	2	-1.57762	NoDiff	10	-0.803747	NoDiff	57	-0.254039	NIM
Cluster_102255	5	22834688	22835294	24	Intergenic	-	0.664303	DHPE	78	1.05121	NoDiff	62	1.01978	NoDiff	99	0.250263	NoDiff
Cluster_102256	5	22835404	22835874	24	Intergenic	-	0.392304	AE	12	1.1751	NoDiff	25	0.954215	NoDiff	154	1.20752	NoDiff
Cluster_102257	5	22838500	22839016	24	TE	-	0.969816	NoDiff	29	0.521933	NoDiff	19	0.733018	NoDiff	21	-2.05988	NoDiff
Cluster_102258	5	22839278	22839784	24	TE	-	2.78729	NoDiff	16	-4.36714	NoDiff	9	-4.01786	NoDiff	20	-1.25853	NoDiff
Cluster_102264	5	22915338	22915536	24	Intergenic	-	0.838311	DHPE	0	0	NoDiff	0	0	NoDiff	0	0	NoDiff
Cluster_102266	5	22916323	22916505	24	Intergenic	-	0.673324	DHPE	0	1.28358	NoDiff	0	1.81441	NoDiff	0	0.216667	NoDiff
Cluster_102268	5	22929450	22929741	24	TE	-	0.486424	AE	0	0	NoDiff	0	0	NoDiff	0	0	NoDiff
Cluster_102271	5	22937135	22937579	24	TE	-	0.166046	AE	26	1.32372	NoDiff	21	-1.0405	NoDiff	116	2.00743	TCM
Cluster_102276	5	23055968	23056237	24	Intergenic	-	0.0231075	AE	14	0.1547	NoDiff	11	0.128982	NoDiff	103	-0.496812	NIM
Cluster_102277	5	23081215	23081489	24	5'-2k	Zm00001d013859	-0.52222	DLPE	6	-0.117708	NoDiff	13	0.965437	NoDiff	83	0.0473415	NoDiff
Cluster_102279	5	23096118	23096399	24	3'-2k	Zm00001d013859	0.598197	DHPE	28	0.67307	TCM	11	1.21622	NoDiff	90	2.31451	NoDiff
Cluster_102281	5	23120066	23120702	24	TE	-	16.7984	NoDiff	83	0.960401	NoDiff	54	0.970589	NoDiff	95	1.62064	NoDiff
Cluster_102282	5	23120850	23121187	24	TE	-	0.637605	DHPE	45	0.905928	NoDiff	34	0.640208	NoDiff	83	0.730629	NoDiff
Cluster_102284	5	23136286	23136694	24	5'-2k	Zm00001d013860	0.914666	DHPE	28	0.959347	NoDiff	19	1.27588	NoDiff	105	1.30872	NoDiff
Cluster_102285	5	23153689	23154036	24	5'-2k	Zm00001d013861	-0.771137	NoDiff	0	2.86842	NoDiff	0	2.64706	NoDiff	0	0	NoDiff
Cluster_102292	5	23254054	23255748	24	Gene body	Zm00001d013863	1.86696	NoDiff	51	-0.966654	NoDiff	54	37.4777	NoDiff	206	-0.150632	NoDiff
Cluster_102293	5	23262597	23264246	24	5'-2k	Zm00001d013864	-0.436539	NoDiff	105	-0.237988	NoDiff	82	0.49914	NIM	369	0.186068	NoDiff
Cluster_102294	5	23265934	23266781	24	3'-2k	Zm00001d013864	-0.151746	NoDiff	62	-0.472034	NoDiff	41	0.544431	TCM	229	0.787245	NoDiff
Cluster_102295	5	23267111	23267567	24	3'-2k	Zm00001d013864	-0.864497	NoDiff	34	0.062223	NoDiff	36	0.502832	TCM	135	13.7344	NoDiff
Cluster_102298	5	23289147	23289815	24	Intergenic	-	4.46042	NoDiff	19	0.640296	NoDiff	13	0.472099	NIM	122	-0.0657724	NIM
Cluster_102299	5	23309741	23309952	24	5'-2k	Zm00001d013868	0.154773	AE	2	0.969022	NoDiff	3	0.33657	NoDiff	13	-1.71799	NoDiff
Cluster_1023	1	7685576	7686290	24	3'-2k	Zm00001d027536	0.996301	DHPE	24	-0.570935	TCdM	13	-11.0503	NoDiff	116	-1.65289	NoDiff
Cluster_10230	1	93846150	93846476	24	5'-2k	Zm00001d029913	0.176423	NoDiff	34	-0.254439	NoDiff	16	-0.0115241	NoDiff	36	-3.83694	NoDiff
Cluster_102300	5	23310089	23310408	24	5'-2k	Zm00001d013868	-0.178131	NoDiff	35	2.68558	NoDiff	7	2.94056	NoDiff	76	-1.05085	TCdM
Cluster_102301	5	23317624	23318336	24	3'-2k	Zm00001d013868	0.0527736	AE	18	0.314452	NIM	24	0.336122	NIM	99	-1.20315	NoDiff
Cluster_102302	5	23319214	23319744	24	Intergenic	-	0.208199	NoDiff	5	-2.41779	NoDiff	3	-1.81595	NoDiff	11	0.211401	NIM
Cluster_102303	5	23327786	23328095	24	Intergenic	-	2.62677	NoDiff	30	0.349738	NoDiff	24	1.70977	NoDiff	52	-0.749688	TCdM
Cluster_102304	5	23330364	23330639	24	TE	-	Inf	NoDiff	9	-0.330503	NIM	26	0.537325	NoDiff	61	0.380629	NoDiff
Cluster_102305	5	23374282	23375070	24	TE	-	-0.247592	NoDiff	0	1.03511	NoDiff	0	1.11177	NoDiff	0	2.11792	NoDiff
Cluster_102306	5	23375728	23375990	24	Intergenic	-	-0.422986	AE	0	0.874211	NoDiff	0	0.742759	NoDiff	0	-0.00819454	NoDiff
Cluster_102308	5	23395272	23396219	24	TE	-	0.292769	AE	0	1.08598	NoDiff	0	1.00962	NoDiff	0	0.379667	NoDiff
Cluster_102309	5	23397891	23398154	24	Intergenic	-	-0.105871	AE	16	-38.1079	NoDiff	14	-0.621058	NoDiff	61	-2.72424	NoDiff
Cluster_10231	1	93853097	93853478	24	Intergenic	-	17.1259	NoDiff	14	2.73231	NoDiff	13	1.28186	NoDiff	107	-0.786272	NoDiff
Cluster_102310	5	23398860	23399337	24	Intergenic	-	-0.574974	NoDiff	28	-10.3349	NoDiff	15	0.104855	NoDiff	118	-0.689816	NoDiff
Cluster_102311	5	23400017	23400695	24	Intergenic	-	-0.907347	DLPE	29	0.0159474	NoDiff	33	0.934515	NoDiff	133	-0.382805	NoDiff
Cluster_102313	5	23457402	23457772	24	3'-2k	Zm00001d013869	0.344335	NoDiff	0	0	NoDiff	0	0	NoDiff	0	-1	NoDiff
Cluster_102314	5	23461674	23461935	24	Intergenic	-	-0.282779	AE	16	-0.336941	NIM	9	-0.516936	TCdM	73	-0.982647	TCdM
Cluster_102315	5	23462014	23462501	24	Intergenic	-	-0.220996	AE	54	0.943883	NoDiff	42	1.04517	NoDiff	144	2.0409	NoDiff
Cluster_102319	5	23499422	23499978	24	Intergenic	-	0.0976483	AE	37	0.772238	NoDiff	33	0.782375	TCM	170	0.17505	NIM
Cluster_102320	5	23500397	23500747	24	Intergenic	-	0.198313	AE	16	1.83883	NoDiff	29	0.986463	TCM	69	-0.332947	NIM
Cluster_102321	5	23501625	23502708	24	Intergenic	-	-0.439976	NoDiff	44	0.0402224	NoDiff	41	-0.0826774	NIM	309	-3.37126	NoDiff
Cluster_102322	5	23503695	23504951	24	TE	-	-0.298667	AE	117	2.59594	NoDiff	64	1.30544	NoDiff	311	-0.907149	NoDiff
Cluster_102324	5	23535189	23536401	24	5'-2k	Zm00001d013873	0.0721293	AE	97	-0.375938	NoDiff	80	0.784709	NoDiff	319	-0.326082	NIM
Cluster_102325	5	23540356	23540799	24	5'-2k	Zm00001d013874	0.111357	AE	26	1.02676	NoDiff	18	1.34124	NoDiff	115	0.422555	NoDiff
Cluster_102326	5	23540879	23541027	24	5'-2k	Zm00001d013874	0.607186	DHPE	18	1.13359	NoDiff	16	1.1995	NoDiff	37	0.947362	NoDiff
Cluster_102327	5	23546209	23547007	24	Intergenic	-	1.69497	NoDiff	96	-0.754523	NoDiff	50	3.86869	NoDiff	167	0.104432	NoDiff
Cluster_102329	5	23552976	23554078	24	5'-2k	Zm00001d013875	0.323264	NoDiff	101	-1.56789	NoDiff	70	0.637054	NoDiff	229	1.16785	NoDiff
Cluster_102330	5	23554824	23555289	24	3'-2k	Zm00001d013875	1.91818	NoDiff	19	-0.0174361	NoDiff	19	-0.481859	NoDiff	101	-0.238817	NIM
Cluster_102334	5	23652675	23653552	24	Intergenic	-	-0.562543	NoDiff	41	-5.6196	NoDiff	52	-0.178195	NoDiff	202	0.422677	NoDiff
Cluster_102336	5	23654500	23654795	24	Intergenic	-	0.568872	DHPE	3	-0.556189	NoDiff	3	-0.122752	NoDiff	14	-0.554884	TCdM
Cluster_102337	5	23655329	23655720	24	Intergenic	-	0.0510657	AE	0	0	NoDiff	0	0	NoDiff	0	0	NoDiff
Cluster_102338	5	23656306	23656521	24	Intergenic	-	0.300294	NoDiff	0	0	NoDiff	0	0	NoDiff	0	0	NoDiff
Cluster_102339	5	23657489	23658414	24	Intergenic	-	1.57645	NoDiff	59	3.26493	NoDiff	64	1.51295	NoDiff	203	0.252368	NoDiff
Cluster_102340	5	23659150	23659618	24	Intergenic	-	1.73689	NoDiff	21	0.469205	NoDiff	11	-0.0674808	NoDiff	63	0.131414	NoDiff
Cluster_102341	5	23660575	23662270	24	TE	-	-1.40097	NoDiff	109	0.325875	NoDiff	99	-1.17203	NoDiff	466	-1.05921	NoDiff
Cluster_102342	5	23662707	23663243	24	TE	-	1.51082	NoDiff	53	0.618684	NoDiff	31	-0.509124	NoDiff	166	-0.502749	NoDiff
Cluster_102343	5	23664366	23664522	24	TE	-	0.22383	NoDiff	2	4.4914	NoDiff	8	-3.77016	NoDiff	48	2.75604	NoDiff
Cluster_102344	5	23670785	23671252	24	5'-2k	Zm00001d013878	-0.616748	NoDiff	21	-1.64788	NoDiff	21	-0.462648	NoDiff	87	-0.645079	NoDiff
Cluster_102347	5	23707779	23708386	24	3'-2k	Zm00001d013879	-0.509539	DLPE	12	0.993075	NoDiff	2	1.49472	NoDiff	35	-0.0706871	NIM
Cluster_10235	1	93913758	93914313	24	Intergenic	-	0.257176	NoDiff	36	1.88568	NoDiff	33	1.47328	NoDiff	159	-0.0871668	NoDiff
Cluster_102350	5	23711948	23712454	24	Intergenic	-	-0.351624	AE	29	3.24315	NoDiff	14	-0.946083	NoDiff	150	-5.93687	NoDiff
Cluster_102352	5	23712773	23712872	24	Intergenic	-	-0.666032	DLPE	14	-0.22444	NoDiff	17	0.468387	NoDiff	30	-0.0963665	NoDiff
Cluster_102355	5	23747552	23747762	24	TE	-	-0.853452	DLPE	2	-1	NoDiff	6	-0.116564	NoDiff	8	-0.537592	NoDiff
Cluster_102359	5	23767211	23767678	24	3'-2k	Zm00001d013884	1.85939	NoDiff	13	-0.898409	NoDiff	16	0.872235	NoDiff	125	0.8771	NoDiff
Cluster_10236	1	93915444	93915562	24	Intergenic	-	0.175182	AE	11	-0.026637	NoDiff	3	0.581853	NoDiff	28	0.836891	NoDiff
Cluster_102363	5	23770216	23771434	24	Gene body	Zm00001d013885	2.24183	NoDiff	108	-0.44927	NoDiff	113	-0.302684	NoDiff	216	-0.0775593	NoDiff
Cluster_102366	5	23777644	23777931	24	5'-2k	Zm00001d013885	-0.840173	DLPE	4	0.0360945	NIM	2	-0.197822	NIM	22	-0.887844	TCdM
Cluster_102367	5	23780400	23780772	24	3'-2k	Zm00001d013886	0.0874953	AE	15	-0.353039	NoDiff	21	-0.0373469	NIM	121	-0.659988	NoDiff
Cluster_102369	5	23786048	23786200	24	5'-2k	Zm00001d013886	-0.343646	NoDiff	0	0	NoDiff	3	19.4206	NoDiff	21	33.4706	NoDiff
Cluster_10237	1	93915683	93916062	24	Intergenic	-	-1.06528	NoDiff	11	-1.89289	NoDiff	27	0.823347	NoDiff	115	-0.311936	NoDiff
Cluster_102370	5	23786285	23787082	24	TE	-	-0.51217	DLPE	9	1.13966	TCM	8	0.797678	TCM	54	-0.992004	NoDiff
Cluster_102371	5	23787273	23787943	24	TE	-	-0.334562	AE	14	0.722791	NoDiff	10	-1.3137	NoDiff	80	-0.996303	NoDiff
Cluster_102373	5	23851704	23852321	24	3'-2k	Zm00001d013887	-0.151199	AE	24	-1.02643	NoDiff	21	0.193687	NIM	72	0.687258	TCM
Cluster_102374	5	23855109	23856623	24	Gene body	Zm00001d013887	-0.404249	AE	0	1.08543	NoDiff	0	0.896909	NoDiff	6	-0.810466	NoDiff
Cluster_102376	5	23858312	23860022	24	Gene body	Zm00001d013887	-0.223464	AE	0	0.985794	NoDiff	0	-0.0311774	NoDiff	0	3.37771	NoDiff
Cluster_102378	5	23864617	23865297	24	Gene body	Zm00001d013887	1.97821	NoDiff	0	0.890347	NoDiff	0	0.947993	NoDiff	0	0.114398	NoDiff
Cluster_102380	5	23867285	23867970	24	Gene body	Zm00001d013887	3.43745	THPE	1	0.37824	NoDiff	7	0.691524	TCM	16	0.667484	NoDiff
Cluster_102381	5	23868253	23868819	24	Gene body	Zm00001d013887	-0.36232	AE	0	1.04472	NoDiff	0	1.01392	NoDiff	0	-1	NoDiff
Cluster_102385	5	23872819	23873212	24	Gene body	Zm00001d013887	-0.936889	DLPE	0	1.02343	NoDiff	0	0.809081	NoDiff	0	-0.217224	NoDiff
Cluster_102389	5	23883629	23884819	24	5'-2k	Zm00001d013887	0.0335378	AE	8	1.05039	NoDiff	6	6.42551	NoDiff	52	-0.335525	NoDiff
Cluster_10239	1	93953391	93953877	24	TE	-	0.215491	NoDiff	30	2.4109	NoDiff	17	5.76364	NoDiff	58	-0.379116	NIM
Cluster_102390	5	23915426	23916411	24	Intergenic	-	-0.332178	AE	4	0.971407	NoDiff	3	0.535226	NoDiff	31	0.182713	NoDiff
Cluster_102391	5	23916710	23917165	24	TE	-	-0.318288	AE	21	-0.289947	NIM	23	0.0615323	NIM	93	-0.123099	NoDiff
Cluster_102392	5	23918206	23918552	24	TE	-	-0.69291	DLPE	24	-9.54334	NoDiff	34	-0.306264	NoDiff	88	-0.839859	NoDiff
Cluster_102395	5	23990392	23992506	24	5'-2k	Zm00001d013891	0.0667049	AE	144	-1.61064	NoDiff	72	0.838021	NoDiff	332	-2.07817	NoDiff
Cluster_102398	5	23995020	23996494	24	Gene body	Zm00001d013891	0.00870852	NoDiff	69	1.91698	NoDiff	98	1.10243	NoDiff	364	-0.329239	NoDiff
Cluster_102399	5	23998892	24002879	24	Gene body	Zm00001d013891	-0.0537203	NoDiff	107	-1.49533	NoDiff	207	-1.03004	NoDiff	1112	0.860622	NoDiff
Cluster_1024	1	7687726	7688172	24	Gene body	Zm00001d027536	-0.366501	AE	0	1.12327	NoDiff	8	0.288716	NoDiff	56	-0.368058	NIM
Cluster_10240	1	94013470	94014149	24	Intergenic	-	2.49037	NoDiff	10	0.262005	NoDiff	51	0.0426415	NoDiff	184	-0.419824	NoDiff
Cluster_102400	5	24008549	24009645	24	3'-2k	Zm00001d013891	0.0612863	AE	0	1.02633	NoDiff	0	0.940089	NoDiff	0	-0.0122963	NoDiff
Cluster_102401	5	24009854	24010210	24	3'-2k	Zm00001d013891	-0.485	AE	3	0.764988	NoDiff	3	0.71705	NoDiff	25	0.541027	NoDiff
Cluster_102402	5	24010434	24010645	24	3'-2k	Zm00001d013891	0.525423	NoDiff	1	-1.39666	NoDiff	2	0.752258	TCM	22	0.557307	TCM
Cluster_102405	5	24017778	24018269	24	3'-2k	Zm00001d013894	-0.0372965	AE	8	-0.343104	NoDiff	17	-0.30471	NoDiff	83	-0.274444	NIM
Cluster_102406	5	24018356	24018919	24	3'-2k	Zm00001d013894	0.273306	NoDiff	0	1.0404	NoDiff	4	2.78015	NoDiff	13	-0.162292	NoDiff
Cluster_102407	5	24024729	24025639	24	Gene body	Zm00001d013894	-0.0407283	AE	44	-0.111208	NIM	76	-0.0671062	NIM	220	-2.99339	NoDiff
Cluster_102409	5	24027088	24027652	24	5'-2k	Zm00001d013894	2.37526	NoDiff	32	0.0042762	NIM	23	-0.141604	NIM	106	-0.824167	TCdM
Cluster_102410	5	24027967	24028280	24	3'-2k	Zm00001d013893	0.174513	AE	0	0	NoDiff	0	0	NoDiff	0	0	NoDiff
Cluster_102412	5	24052552	24052802	24	Intergenic	-	-0.181574	AE	4	-13.9764	NoDiff	2	-0.11973	NoDiff	15	-1.65101	TCdM
Cluster_102413	5	24055233	24056024	24	Intergenic	-	-0.380402	AE	0	0.977119	NoDiff	0	0.709482	NoDiff	0	0.121463	NoDiff
Cluster_102415	5	24061771	24062157	24	TE	-	-0.375835	NoDiff	0	0.725475	NoDiff	1	-0.691414	NoDiff	3	-9.04899	NoDiff
Cluster_102416	5	24092258	24092615	24	Gene body	Zm00001d013895	0.248713	AE	26	-0.371485	NIM	17	0.224123	NoDiff	95	-0.109296	NoDiff
Cluster_102419	5	24137860	24139259	24	Intergenic	-	0.538692	DHPE	127	0.0960057	NoDiff	134	0.180878	NoDiff	406	-0.662537	NoDiff
Cluster_102421	5	24142386	24142469	24	Intergenic	-	1.93771	DHPE	6	-0.44718	NoDiff	6	2.33122	NoDiff	24	-0.0660135	NoDiff
Cluster_102422	5	24159375	24159894	24	Intergenic	-	1.38679	DHPE	24	-0.334724	NoDiff	15	0.361845	NIM	126	-0.550164	NoDiff
Cluster_102423	5	24172402	24173086	24	Intergenic	-	-0.0299076	AE	40	0.532891	TCM	26	3.23695	NoDiff	203	0.757126	TCM
Cluster_102424	5	24176857	24177545	24	5'-2k	Zm00001d013896	0.138013	AE	4	0.559749	NoDiff	4	0.611624	NoDiff	64	-0.401708	NIM
Cluster_102425	5	24177914	24178410	24	5'-2k	Zm00001d013896	0.372931	AE	3	0.00856466	NoDiff	3	-0.928514	NoDiff	4	-2.06049	NoDiff
Cluster_102428	5	24187659	24188527	24	TE	-	-0.765614	DLPE	52	-1.12198	NoDiff	85	-0.791904	NoDiff	90	2.31152	NoDiff
Cluster_10243	1	94024096	94024955	24	TE	-	1.39423	NoDiff	14	7.51045	NoDiff	55	28.1136	NoDiff	258	0.32516	NoDiff
Cluster_102431	5	24205235	24206450	24	TE	-	0.00927076	AE	5	1.03955	NoDiff	5	0.403281	NoDiff	7	-3.66945	NoDiff
Cluster_102432	5	24207135	24207860	24	Intergenic	-	-0.89253	DLPE	31	-0.375198	NIM	22	-0.745167	TCdM	149	-0.619282	TCdM
Cluster_102433	5	24208488	24208834	24	Intergenic	-	-0.817425	DLPE	5	-0.0614424	NoDiff	14	-0.176243	NoDiff	43	-0.209325	NIM
Cluster_102434	5	24209048	24209664	24	Intergenic	-	0.368688	NoDiff	26	0.111095	NoDiff	35	-1.13536	NoDiff	192	-1.155	NoDiff
Cluster_102436	5	24236168	24236583	24	TE	-	0.0808551	AE	33	-0.241503	NoDiff	30	0.491841	NoDiff	123	-0.185601	NIM
Cluster_102437	5	24239968	24240928	24	3'-2k	Zm00001d013899	0.0424199	AE	40	1.41961	NoDiff	92	0.638524	NoDiff	241	-24.6158	NoDiff
Cluster_102439	5	24253137	24254391	24	5'-2k	Zm00001d013899	-18.1598	NoDiff	152	1.55805	NoDiff	170	-0.164294	NoDiff	292	0.121885	NoDiff
Cluster_102440	5	24254583	24255309	24	5'-2k	Zm00001d013899	-1.30284	NoDiff	68	0.257517	NoDiff	50	1.75407	NoDiff	210	0.505967	NoDiff
Cluster_102441	5	24272921	24273370	24	3'-2k	Zm00001d013900	3.41516	NoDiff	50	-4.60077	NoDiff	29	-9.8658	NoDiff	80	-312.999	NoDiff
Cluster_102442	5	24277955	24278349	24	5'-2k	Zm00001d013900	-0.210956	AE	0	0	NoDiff	0	0	NoDiff	0	0	NoDiff
Cluster_102444	5	24299368	24299821	24	5'-2k	Zm00001d013903	0.245774	AE	0	0	NoDiff	0	0	NoDiff	0	0	NoDiff
Cluster_102446	5	24356002	24356143	24	Intergenic	-	-12.9597	NoDiff	1	-0.232892	NoDiff	1	-0.300004	NoDiff	13	1.30498	NoDiff
Cluster_102448	5	24361412	24361886	24	5'-2k	Zm00001d013906	0.398461	AE	0	0.996051	NoDiff	0	1.00149	NoDiff	0	-0.225258	NoDiff
Cluster_102449	5	24362167	24362866	24	5'-2k	Zm00001d013906	0.203467	AE	0	0.92439	NoDiff	0	0.574946	NoDiff	0	-0.0818751	NoDiff
Cluster_10245	1	94029810	94030494	24	Other	-	95.8162	NoDiff	61	0.353937	NoDiff	39	-0.105632	NoDiff	113	5.96822	NoDiff
Cluster_102450	5	24363370	24363654	24	5'-2k	Zm00001d013906	0.117474	AE	0	0.886224	NoDiff	0	-1	NoDiff	0	-1	NoDiff
Cluster_102451	5	24369173	24369372	24	3'-2k	Zm00001d013906	-0.613702	DLPE	0	1	NoDiff	0	0.79021	NoDiff	0	0	NoDiff
Cluster_102452	5	24371477	24372074	24	5'-2k	Zm00001d013907	-0.0810438	AE	14	0.360348	NoDiff	8	-2.68853	NoDiff	30	-0.466299	NoDiff
Cluster_102453	5	24373734	24374067	24	3'-2k	Zm00001d013907	-0.428329	AE	4	-4.08117	NoDiff	7	-0.83508	NoDiff	28	0.744171	TCM
Cluster_102454	5	24374480	24375258	24	3'-2k	Zm00001d013907	-0.128352	AE	18	-8.61015	NoDiff	4	-0.714834	NoDiff	17	0.133671	NIM
Cluster_102455	5	24405574	24406320	24	3'-2k	Zm00001d013908	-0.198637	AE	0	0.857377	NoDiff	0	1.16963	NoDiff	0	-0.412526	NoDiff
Cluster_102456	5	24406401	24406863	24	3'-2k	Zm00001d013908	-0.789888	DLPE	2	0.565152	NoDiff	3	1.98555	NoDiff	18	0.369411	NoDiff
Cluster_102457	5	24410751	24411260	24	Gene body	Zm00001d013908	0.579413	DHPE	22	-0.172957	NoDiff	21	-0.0685706	NoDiff	113	-10.4551	NoDiff
Cluster_102458	5	24413001	24413828	24	5'-2k	Zm00001d013908	-0.0977721	AE	0	0.927573	NoDiff	0	0.813573	NoDiff	0	0.561706	NoDiff
Cluster_102459	5	24414269	24414559	24	5'-2k	Zm00001d013908	-0.456486	AE	17	4.48327	TCM	8	10.1837	NoDiff	40	0.615173	TCM
Cluster_10246	1	94057700	94057861	24	Intergenic	-	-0.65665	NoDiff	22	0.107433	NoDiff	9	-0.773008	NoDiff	49	0.0328546	NoDiff
Cluster_102461	5	24415262	24415658	24	Intergenic	-	0.802425	DHPE	8	16.1309	NoDiff	6	18.9846	NoDiff	41	3.15238	TCM
Cluster_102462	5	24416176	24417390	24	Intergenic	-	0.348031	NoDiff	33	-1.44894	NoDiff	28	0.468717	NoDiff	95	-0.523761	TCdM
Cluster_102463	5	24417659	24418309	24	Intergenic	-	-0.387069	AE	3	-1	NoDiff	16	0.560501	NoDiff	55	0.855309	NoDiff
Cluster_102464	5	24419007	24419225	24	Intergenic	-	-0.573192	DLPE	0	1.83683	NoDiff	0	4.25898	NoDiff	0	-0.386809	NIM
Cluster_102467	5	24422021	24422722	24	3'-2k	Zm00001d013909	-0.162463	AE	3	0.0462868	NoDiff	5	0.38975	NoDiff	5	-10.881	NoDiff
Cluster_102468	5	24424614	24425839	24	5'-2k	Zm00001d013909	-0.116876	AE	57	0.345779	NoDiff	41	0.0808868	NIM	178	-1.84857	NoDiff
Cluster_102469	5	24435619	24436109	24	Gene body	Zm00001d013911	0.59366	DHPE	0	0.890323	NoDiff	0	-0.0615279	NoDiff	0	0.765289	TCM
Cluster_10247	1	94058512	94058965	24	Intergenic	-	1.10687	NoDiff	28	0.335615	NoDiff	34	-0.0103963	NoDiff	88	0.0336777	NoDiff
Cluster_102470	5	24455848	24455887	24	TE	-	0.80433	DHPE	0	1.27422	NoDiff	0	1.54254	NoDiff	0	0	NoDiff
Cluster_102471	5	24513349	24513737	24	Intergenic	-	-0.141937	AE	4	1.00939	NoDiff	8	0.342138	NoDiff	51	-1.18201	NoDiff
Cluster_102472	5	24514121	24514718	24	5'-2k	Zm00001d013912	-0.0636973	AE	0	0.319401	NoDiff	0	0.162831	NoDiff	0	-0.211344	NoDiff
Cluster_102473	5	24514971	24515166	24	5'-2k	Zm00001d013912	-1.07387	NoDiff	0	1.50486	NoDiff	0	-0.00298653	NoDiff	0	0.227885	NoDiff
Cluster_102474	5	24515312	24516942	24	Gene body	Zm00001d013912	-0.428388	AE	143	0.85474	NoDiff	92	0.561965	TCM	263	0.575293	NoDiff
Cluster_102476	5	24612795	24613382	24	TE	-	0.180949	NoDiff	27	-3.45762	NoDiff	34	-0.290766	NoDiff	182	-6.4278	NoDiff
Cluster_102477	5	24614431	24614860	24	TE	-	-19.7255	NoDiff	20	0.192848	NoDiff	25	0.382985	NoDiff	111	-0.78487	NoDiff
Cluster_102478	5	24618855	24619359	24	TE	-	0.218829	NoDiff	67	2.54936	NoDiff	35	2.06948	NoDiff	126	-0.607686	NoDiff
Cluster_102479	5	24620021	24620962	24	Other	-	0.308331	AE	15	5.27046	NoDiff	19	0.645727	NoDiff	88	-1.63313	TCdM
Cluster_10248	1	94072457	94072664	24	TE	-	2.17387	NoDiff	26	-1.08396	NoDiff	22	-1.24231	NoDiff	42	0.642042	NoDiff
Cluster_102480	5	24621520	24621766	24	Other	-	-1.64728	NoDiff	20	0.210627	NIM	14	0.613652	NoDiff	80	2.26587	NoDiff
Cluster_102481	5	24645373	24645956	24	TE	-	0.125548	NoDiff	62	1.06139	NoDiff	36	1.2179	NoDiff	133	0.462771	NoDiff
Cluster_102482	5	24646662	24647233	24	TE	-	0.172428	AE	38	-2.03715	NoDiff	46	0.380685	NoDiff	165	-0.180226	NIM
Cluster_102483	5	24647344	24647669	24	Intergenic	-	-0.0542668	AE	34	6.38826	NoDiff	18	0.662852	TCM	91	0.327366	NoDiff
Cluster_102484	5	24647875	24648163	24	Intergenic	-	0.105794	NoDiff	36	-0.163099	NIM	31	0.0317664	NIM	74	-0.525917	TCdM
Cluster_102485	5	24676216	24677201	24	5'-2k	Zm00001d013914	2.10173	NoDiff	79	0.494853	NoDiff	65	2.32612	NoDiff	262	-0.701978	NoDiff
Cluster_102486	5	24686454	24687429	24	3'-2k	Zm00001d013915	0.561433	NoDiff	21	0.164033	NoDiff	34	0.570912	TCM	169	33.504	NoDiff
Cluster_102488	5	24712955	24713646	24	5'-2k	Zm00001d013917	-0.214724	AE	31	1.92844	NoDiff	20	2.6617	NoDiff	100	-0.584796	NoDiff
Cluster_102489	5	24714785	24714938	24	3'-2k	Zm00001d013917	12.728	NoDiff	0	0	NoDiff	0	0	NoDiff	0	0	NoDiff
Cluster_10249	1	94073337	94073681	24	Intergenic	-	-0.533065	DLPE	8	-0.113717	NoDiff	24	2.29891	NoDiff	72	-1.80977	NoDiff
Cluster_102490	5	24715541	24716943	24	3'-2k	Zm00001d013917	0.12688	AE	0	0.499171	NoDiff	0	0.0619999	NoDiff	0	0.446906	NoDiff
Cluster_102491	5	24717182	24718029	24	TE	-	-0.609044	DLPE	0	1.46192	NoDiff	0	1.21745	NoDiff	0	1.20894	NoDiff
Cluster_102493	5	24813551	24814376	24	5'-2k	Zm00001d013918	-0.557966	DLPE	15	0.436707	NIM	16	0.188135	NIM	144	-0.570747	NoDiff
Cluster_102497	5	24847188	24847470	24	3'-2k	Zm00001d013920	-0.205036	AE	4	2.09317	NoDiff	3	2.67274	NoDiff	8	0	NoDiff
Cluster_102498	5	24854442	24854686	24	5'-2k	Zm00001d013920	2.06729	NoDiff	14	-0.28927	NoDiff	8	-0.352983	NoDiff	49	0.397247	NoDiff
Cluster_102499	5	24854993	24856356	24	5'-2k	Zm00001d013920	-39.991	NoDiff	87	-0.676262	NoDiff	58	-0.404049	NoDiff	381	-0.510139	TCdM
Cluster_1025	1	7689834	7692720	24	Gene body	Zm00001d027536	1.74664	NoDiff	136	0.255735	NoDiff	124	0.402074	NoDiff	323	0.353039	NoDiff
Cluster_10250	1	94093809	94093993	24	Intergenic	-	-0.836866	NoDiff	13	0.827238	NoDiff	9	0.271582	NoDiff	15	1.70417	NoDiff
Cluster_102500	5	24856754	24857546	24	Other	-	1.19546	NoDiff	81	0.203839	NoDiff	50	0.689155	NoDiff	192	-4.43053	NoDiff
Cluster_102501	5	24857954	24858516	24	Other	-	1.57762	NoDiff	49	0.18953	NoDiff	34	0.57377	TCM	124	-0.413221	NoDiff
Cluster_102503	5	24859169	24860184	24	Intergenic	-	0.123658	AE	70	0.194842	NoDiff	41	-0.113412	NoDiff	226	1.16701	NoDiff
Cluster_102504	5	24860589	24860927	24	Intergenic	-	0.433736	AE	51	1.00349	NoDiff	27	0.9699	NoDiff	71	0.715372	NoDiff
Cluster_102505	5	24861559	24861820	24	Intergenic	-	1.26614	DHPE	22	1.03165	NoDiff	12	1.34194	NoDiff	70	0.489033	NoDiff
Cluster_102506	5	24862131	24862685	24	Intergenic	-	1.49913	DHPE	74	0.865068	NoDiff	48	0.933147	NoDiff	135	6.35672	NoDiff
Cluster_102508	5	24914122	24914675	24	Intergenic	-	0.532234	DHPE	31	4.14454	TCM	28	2.39558	NoDiff	121	-0.820757	NoDiff
Cluster_102509	5	24915211	24915480	24	TE	-	0.972477	DHPE	14	0.470034	NoDiff	17	0.333761	NoDiff	48	-0.144162	NoDiff
Cluster_102510	5	24916360	24917217	24	TE	-	1.51634	NoDiff	68	-0.497033	NoDiff	38	-1.02317	NoDiff	220	0.429354	NoDiff
Cluster_102511	5	24942325	24942982	24	5'-2k	Zm00001d013923	0.0300749	AE	46	-1.17946	NoDiff	37	-0.568978	NoDiff	192	-0.232167	NIM
Cluster_102513	5	24958252	24958912	24	Intergenic	-	1.71273	NoDiff	56	0.886132	NoDiff	22	-0.0790989	NoDiff	185	-0.469997	NIM
Cluster_102516	5	24983508	24983663	24	5'-2k	Zm00001d013926	-1.00739	NoDiff	10	1.01223	NoDiff	6	1.07219	NoDiff	47	0.844444	NoDiff
Cluster_102517	5	25001435	25001789	24	TE	-	1.97853	NoDiff	0	0	NoDiff	0	0	NoDiff	0	0	NoDiff
Cluster_102522	5	25111042	25111186	24	5'-2k	Zm00001d013931	-0.155715	AE	14	0.40866	NoDiff	10	-0.318633	NoDiff	32	-0.541317	TCdM
Cluster_102523	5	25113116	25113260	24	3'-2k	Zm00001d013931	-0.670913	DLPE	4	0.156307	NIM	5	-0.450343	NoDiff	32	-0.786504	TCdM
Cluster_102524	5	25113526	25114143	24	3'-2k	Zm00001d013931	0.143753	NoDiff	26	1.84691	NoDiff	39	3.40678	NoDiff	143	-0.0745671	NIM
Cluster_102525	5	25114546	25114778	24	Intergenic	-	-1.68913	DLPE	40	0.00827846	NoDiff	24	-1.8892	NoDiff	71	2.22012	NoDiff
Cluster_102528	5	25176616	25177127	24	3'-2k	Zm00001d013933	0.32125	AE	48	0.137259	NIM	32	0.0152612	NIM	168	-0.659859	TCdM
Cluster_10253	1	94199733	94200332	24	TE	-	0.300354	NoDiff	12	19.432	NoDiff	27	0.318951	NIM	179	-0.48573	NIM
Cluster_102530	5	25184641	25184930	24	3'-2k	Zm00001d013934	-0.621839	DLPE	0	0	NoDiff	0	0	NoDiff	0	0	NoDiff
Cluster_102534	5	25241840	25242949	24	5'-2k	Zm00001d013935	0.712692	DHPE	52	0.667332	NoDiff	50	0.989868	NoDiff	101	-0.787888	NoDiff
Cluster_102536	5	25244710	25245051	24	Gene body	Zm00001d013936	-0.861996	DLPE	9	0.446741	NoDiff	29	0.914265	TCM	29	-0.43106	NoDiff
Cluster_102537	5	25246154	25246675	24	3'-2k	Zm00001d013936	-0.485934	AE	25	0.0516823	NoDiff	26	-0.675147	NoDiff	158	-1.74283	NoDiff
Cluster_102538	5	25247286	25247541	24	Intergenic	-	3.78436	NoDiff	8	-0.0154183	NoDiff	14	-0.578656	NoDiff	77	0.180326	NoDiff
Cluster_102541	5	25339206	25339486	24	TE	-	-3.09722	NoDiff	11	-2.46251	NoDiff	11	-0.802934	NoDiff	35	-1.77966	NoDiff
Cluster_102543	5	25343064	25343603	24	TE	-	0.474937	AE	23	-0.145031	NoDiff	19	-0.142497	NoDiff	88	5.92048	NoDiff
Cluster_102545	5	25359046	25359352	24	TE	-	-0.698496	DLPE	0	0	NoDiff	0	0	NoDiff	0	0	NoDiff
Cluster_10255	1	94203707	94203841	24	3'-2k	Zm00001d029917	1.31563	NoDiff	0	0	NoDiff	0	0	NoDiff	0	0	NoDiff
Cluster_102554	5	25507002	25507272	24	TE	-	-1	DLPE	0	3.43243	NoDiff	0	2.7	NoDiff	0	0	NoDiff
Cluster_102555	5	25513601	25513839	24	TE	-	0.173795	AE	0	-1	NoDiff	0	-1	NoDiff	0	0	NoDiff
Cluster_102556	5	25516551	25516996	24	5'-2k	Zm00001d013940	15.442	NoDiff	14	0.689323	NoDiff	7	0.751311	NoDiff	72	2.12565	NoDiff
Cluster_102557	5	25523845	25524314	24	3'-2k	Zm00001d013940	-0.878722	NoDiff	30	8.35274	NoDiff	34	-0.163179	NoDiff	105	-7.71308	NoDiff
Cluster_102558	5	25533868	25534277	24	Intergenic	-	0.467391	NoDiff	22	2.16798	NoDiff	18	-3.49776	NoDiff	80	-1.38189	NoDiff
Cluster_102559	5	25534444	25535568	24	5'-2k	Zm00001d013941	21.9439	NoDiff	86	0.434956	NoDiff	45	1.96545	NoDiff	294	0.296772	NoDiff
Cluster_102568	5	25619123	25619949	24	Intergenic	-	1.4958	NoDiff	26	3.14738	NoDiff	43	2.1728	NoDiff	236	1.11104	NoDiff
Cluster_102569	5	25620257	25621091	24	TE	-	8.19178	NoDiff	34	0.466099	NIM	26	-0.165809	NIM	218	-0.96577	NoDiff
Cluster_10257	1	94243781	94244209	24	TE	-	-3.67292	NoDiff	18	1.09129	NoDiff	22	0.0970192	NoDiff	108	8.63427	NoDiff
Cluster_102571	5	25622169	25622324	24	TE	-	1.63713	DHPE	9	1.96578	NoDiff	8	0.897887	NoDiff	31	0.99458	NoDiff
Cluster_102572	5	25623290	25623513	24	Intergenic	-	-4.317	TLPE	0	0	NoDiff	0	0	NoDiff	0	0	NoDiff
Cluster_102574	5	25634505	25635142	24	5'-2k	Zm00001d013947	0.290521	AE	0	0.950442	NoDiff	0	0.821782	NoDiff	0	0.137079	NoDiff
Cluster_102577	5	25668541	25668990	24	5'-2k	Zm00001d013948	-1.72555	NoDiff	13	1.45879	NoDiff	25	-0.955092	NoDiff	93	-2.8644	NoDiff
Cluster_102579	5	25741045	25741537	24	TE	-	0.933969	DHPE	19	0.969939	NoDiff	12	-0.667874	NoDiff	7	-2.14533	NoDiff
Cluster_10258	1	94246744	94247131	24	Intergenic	-	-2.6205	NoDiff	18	2.3153	NoDiff	31	5.11475	NoDiff	107	-2.01873	NoDiff
Cluster_102581	5	25845726	25846484	24	3'-2k	Zm00001d013949	0.0480797	NoDiff	1	1.06693	NoDiff	6	0.934012	NoDiff	19	0.435661	NoDiff
Cluster_102585	5	25854071	25854140	24	TE	-	1.27259	DHPE	8	6.42751	NoDiff	4	1.69911	NoDiff	23	-0.778383	NoDiff
Cluster_102586	5	25861950	25862132	24	Intergenic	-	-60.2567	NoDiff	0	0	NoDiff	0	0	NoDiff	0	0	NoDiff
Cluster_102587	5	25864400	25864581	24	3'-2k	Zm00001d013950	0.902987	NoDiff	0	0	NoDiff	0	0	NoDiff	0	0	NoDiff
Cluster_102588	5	25866118	25866743	24	5'-2k	Zm00001d013950	2.62675	NoDiff	59	0.221084	NoDiff	52	0.0355216	NoDiff	111	-1.43685	NoDiff
Cluster_10259	1	94270775	94271158	24	Intergenic	-	3.55308	NoDiff	21	-15.5638	NoDiff	14	2.29487	NoDiff	43	-0.0196487	NoDiff
Cluster_102593	5	26013302	26013425	24	5'-2k	Zm00001d013951	-0.75947	DLPE	6	-3.78336	NoDiff	9	-0.0817721	NoDiff	33	-0.0370807	NIM
Cluster_102594	5	26014470	26014714	24	5'-2k	Zm00001d013951	0.428738	AE	7	0.869812	NoDiff	7	11.1103	NoDiff	20	0.843935	TCM
Cluster_102595	5	26014804	26015258	24	5'-2k	Zm00001d013951	8.3255	NoDiff	3	0.718813	NoDiff	5	1.27682	NoDiff	59	0.155476	NoDiff
Cluster_102598	5	26017789	26019188	24	Gene body	Zm00001d013951	0.456286	NoDiff	84	-0.773833	NoDiff	100	-0.392103	NoDiff	361	-0.102683	NoDiff
Cluster_102599	5	26021833	26022435	24	Gene body	Zm00001d013951	-2.62204	NoDiff	48	1.65092	NoDiff	56	12.1299	NoDiff	116	4.20981	NoDiff
Cluster_1026	1	7692796	7694361	24	Gene body	Zm00001d027536	0.00230661	NoDiff	105	0.25609	NoDiff	124	0.248177	NoDiff	411	0.561197	NoDiff
Cluster_10260	1	94281529	94281727	24	Intergenic	-	-0.885908	NoDiff	23	-0.843145	NoDiff	8	-5.05696	NoDiff	26	-0.726703	NoDiff
Cluster_102600	5	26022891	26023640	24	3'-2k	Zm00001d013951	1.16524	NoDiff	23	-0.0961011	NoDiff	42	-0.832301	TCdM	194	-0.980795	NoDiff
Cluster_102601	5	26043268	26045326	24	Intergenic	-	1.37345	NoDiff	110	0.43869	NoDiff	96	0.091271	NIM	462	-0.29626	NoDiff
Cluster_102602	5	26051029	26052347	24	Intergenic	-	0.18353	NoDiff	42	4.6731	NoDiff	62	0.441212	NIM	298	-0.484247	NoDiff
Cluster_102603	5	26052480	26054544	24	Intergenic	-	-0.0890323	NoDiff	92	-0.439752	NoDiff	85	0.439252	NoDiff	252	-1.3439	NoDiff
Cluster_102604	5	26056737	26057518	24	3'-2k	Zm00001d013953	-4.70398	NoDiff	84	0.125595	NoDiff	58	50.452	NoDiff	151	2.18951	NoDiff
Cluster_102605	5	26057947	26058253	24	3'-2k	Zm00001d013953	0.919255	NoDiff	0	2.91739	NoDiff	0	3.4417	NoDiff	0	0	NoDiff
Cluster_102607	5	26060171	26061745	24	5'-2k	Zm00001d013953	5.85986	NoDiff	82	0.0351104	NoDiff	81	-0.201139	NoDiff	326	0.0896785	NoDiff
Cluster_10261	1	94282285	94282468	24	Intergenic	-	-0.2931	AE	3	-1.68861	NoDiff	4	-1.7156	NoDiff	5	-0.378515	NoDiff
Cluster_102610	5	26062868	26063837	24	Intergenic	-	3.12116	NoDiff	50	3.04763	NoDiff	39	0.433319	NoDiff	181	10.4463	NoDiff
Cluster_102612	5	26065804	26066215	24	Intergenic	-	0.233023	AE	0	0.998286	NoDiff	0	0.934594	NoDiff	0	0.114857	NoDiff
Cluster_102615	5	26069513	26070028	24	TE	-	10.7368	NoDiff	0	0.993001	NoDiff	0	0.803339	NoDiff	0	0	NoDiff
Cluster_102616	5	26070406	26070915	24	TE	-	0.315019	NoDiff	0	1.1342	NoDiff	0	0.882331	TCM	0	-0.659679	NoDiff
Cluster_102617	5	26071605	26072125	24	TE	-	-0.809881	DLPE	0	1.08557	NoDiff	0	1.12316	NoDiff	0	0.170756	NoDiff
Cluster_102618	5	26072211	26073716	24	Intergenic	-	1.80432	DHPE	12	0.387165	NoDiff	32	0.421218	NIM	136	-1.20839	NoDiff
Cluster_102619	5	26074468	26076354	24	Intergenic	-	0.556339	NoDiff	102	0.243416	NoDiff	106	-0.320915	NoDiff	452	-1.61903	NoDiff
Cluster_102620	5	26077314	26077966	24	Intergenic	-	1.5024	NoDiff	57	-0.537897	NoDiff	30	0.765522	NoDiff	208	0.619276	NoDiff
Cluster_102621	5	26079362	26081747	24	Intergenic	-	-0.307842	NoDiff	117	-0.76241	NoDiff	112	-0.487485	NIM	356	-5.51433	NoDiff
Cluster_102622	5	26082227	26083079	24	Intergenic	-	0.588147	NoDiff	27	0.501376	NoDiff	90	-0.420436	NIM	259	-0.851245	NoDiff
Cluster_102624	5	26084668	26087092	24	Intergenic	-	0.191247	NoDiff	143	0.660116	NoDiff	168	1.14741	NoDiff	602	1.74293	NoDiff
Cluster_102625	5	26087170	26088517	24	Intergenic	-	2.95507	NoDiff	32	0.545331	NoDiff	89	-0.333634	NIM	333	-0.542456	NoDiff
Cluster_102626	5	26089032	26089822	24	TE	-	-0.559903	NoDiff	27	5.36457	NoDiff	54	-0.0473687	NIM	199	-1.68091	NoDiff
Cluster_102629	5	26092305	26092709	24	Intergenic	-	-0.0148579	NoDiff	11	0.913275	NoDiff	17	0.838327	NoDiff	42	-2.35066	NoDiff
Cluster_10263	1	94309449	94309676	24	Intergenic	-	-0.447771	AE	0	1.31041	NoDiff	0	1.17047	NoDiff	0	0.395419	NoDiff
Cluster_102630	5	26092818	26093501	24	Intergenic	-	12.2645	NoDiff	40	0.685596	NoDiff	29	-0.168837	NoDiff	48	-0.215643	NoDiff
Cluster_102635	5	26099546	26100258	24	3'-2k	Zm00001d013954	0.355332	NoDiff	38	-0.182438	NoDiff	18	0.518513	NoDiff	188	0.0789694	NoDiff
Cluster_102637	5	26106235	26106911	24	Gene body	Zm00001d013955	0.0357004	AE	58	0.754561	NoDiff	54	0.498953	NoDiff	171	2.28212	NoDiff
Cluster_102638	5	26108463	26109713	24	3'-2k	Zm00001d013955	-0.0750238	AE	2	0.753322	TCM	6	0.561748	TCM	19	-6.32278	NoDiff
Cluster_102639	5	26109905	26110129	24	3'-2k	Zm00001d013955	-0.020681	NoDiff	6	1.08922	NoDiff	4	1.10497	TCM	4	0.69003	NoDiff
Cluster_102640	5	26119600	26119763	24	TE	-	Inf	NoDiff	0	0	NoDiff	0	0	NoDiff	0	0	NoDiff
Cluster_102641	5	26128940	26129201	24	TE	-	-1	DLPE	0	1.06884	NoDiff	0	1.05975	NoDiff	0	1.20933	NoDiff
Cluster_102642	5	26130359	26130939	24	5'-2k	Zm00001d013956	0.0357777	AE	57	-0.431953	NIM	41	-0.75781	NoDiff	175	0.214473	NoDiff
Cluster_102643	5	26135280	26135725	24	TE	-	-0.170378	AE	0	0.963824	NoDiff	0	1.28266	NoDiff	0	0.17544	NoDiff
Cluster_102644	5	26162667	26162985	24	Intergenic	-	-0.207092	AE	2	1.70386	NoDiff	5	0.06088	NoDiff	41	-0.871329	NoDiff
Cluster_102646	5	26164637	26165112	24	3'-2k	Zm00001d013957	0.22325	AE	0	0.703049	NoDiff	0	1.00161	NoDiff	0	-0.458547	NoDiff
Cluster_102647	5	26166676	26167378	24	Gene body	Zm00001d013957	-0.289047	AE	0	0.990283	NoDiff	0	0.750666	NoDiff	0	0.0470427	NoDiff
Cluster_102648	5	26171325	26172053	24	5'-2k	Zm00001d013957	-0.0864722	NoDiff	59	0.630754	NoDiff	55	2.41159	NoDiff	122	0.634591	TCM
Cluster_102649	5	26182307	26182574	24	Intergenic	-	0.65245	DHPE	32	-0.816434	NoDiff	14	-0.498484	NIM	42	-0.485707	NIM
Cluster_10265	1	94335617	94336242	24	5'-2k	Zm00001d029918	0.25107	AE	0	0.759553	NoDiff	0	0.572155	NoDiff	0	0.804019	NoDiff
Cluster_102650	5	26182672	26183034	24	Intergenic	-	0.229812	AE	54	1.0551	NoDiff	34	-0.124012	NIM	89	0.0425919	NIM
Cluster_102651	5	26235694	26236647	24	3'-2k	Zm00001d013958	-0.384002	AE	75	-0.410143	NoDiff	47	-1.02518	NoDiff	229	-1.39175	NoDiff
Cluster_102652	5	26236999	26237289	24	3'-2k	Zm00001d013958	-0.671545	NoDiff	12	-0.923358	NoDiff	22	-1.67449	NoDiff	73	-1.18107	TCdM
Cluster_102654	5	26276322	26277043	24	Intergenic	-	0.152086	AE	1	0.936577	NoDiff	2	0.901463	NoDiff	11	0.363382	NIM
Cluster_102655	5	26277848	26278320	24	Intergenic	-	-0.0470868	AE	0	0.891806	NoDiff	0	0.848629	NoDiff	0	1.04063	NoDiff
Cluster_102656	5	26279040	26279571	24	Intergenic	-	0.570472	DHPE	35	0.018989	NIM	28	-0.16318	NIM	151	-0.203253	NoDiff
Cluster_102659	5	26282997	26283309	24	Intergenic	-	0.12592	NoDiff	13	153.701	NoDiff	16	0.690421	NoDiff	83	0.493697	NoDiff
Cluster_102661	5	26321281	26322070	24	Intergenic	-	1.63501	NoDiff	18	-138.943	NoDiff	31	0.968343	NoDiff	99	0.438516	NoDiff
Cluster_102662	5	26322326	26322615	24	Intergenic	-	-4.42393	NoDiff	5	2.31198	NoDiff	6	-1.8318	NoDiff	13	-1.31473	NoDiff
Cluster_102663	5	26322800	26323187	24	Intergenic	-	0.396287	NoDiff	6	0.618592	NoDiff	15	3.55729	NoDiff	61	0.111546	NoDiff
Cluster_102665	5	26330996	26331645	24	5'-2k	Zm00001d013960	0.911603	DHPE	16	1.08146	NoDiff	18	1.07565	NoDiff	167	4.49577	NoDiff
Cluster_102666	5	26335564	26335664	24	Gene body	Zm00001d013960	-1.36549	NoDiff	0	0	NoDiff	0	0	NoDiff	0	0	NoDiff
Cluster_102667	5	26338414	26339008	24	Intergenic	-	0.624087	NoDiff	24	-0.0244324	NoDiff	21	-1.29587	TCdM	152	-0.972662	NoDiff
Cluster_10267	1	94338790	94339283	24	Gene body	Zm00001d029918	-0.595817	NoDiff	0	0.890712	NoDiff	0	1.08632	NoDiff	0	-1	NoDiff
Cluster_102670	5	26394701	26395367	24	TE	-	-1.16156	NoDiff	22	1.42438	NoDiff	18	0.359514	NoDiff	45	-0.341491	NoDiff
Cluster_102674	5	26414813	26415364	24	3'-2k	Zm00001d013962	3.33681	THPE	58	1.2426	NoDiff	41	1.22781	TCM	84	0	NoDiff
Cluster_102675	5	26415470	26416621	24	3'-2k	Zm00001d013962	1.23407	NoDiff	50	5.46702	NoDiff	40	2.25719	NoDiff	323	0.0181001	NIM
Cluster_102676	5	26417684	26418094	24	5'-2k	Zm00001d013963	0.154627	NoDiff	54	-154.554	NoDiff	40	0.904404	NoDiff	69	0.96189	NoDiff
Cluster_102677	5	26424769	26425582	24	3'-2k	Zm00001d013963	2.00865	NoDiff	71	-8.13853	NoDiff	66	-2.10694	NoDiff	223	15.7886	NoDiff
Cluster_102679	5	26493864	26494194	24	3'-2k	Zm00001d013964	0.4221	NoDiff	12	-1.65996	NoDiff	14	0.243662	NoDiff	76	0.452045	NIM
Cluster_10268	1	94339419	94339795	24	Gene body	Zm00001d029918	-0.0216886	NoDiff	0	0.953175	NoDiff	0	1.20622	NoDiff	0	0.974066	NoDiff
Cluster_102680	5	26494529	26496005	24	3'-2k	Zm00001d013964	5.12696	NoDiff	76	-5.34115	NoDiff	82	-0.0560211	NoDiff	328	-0.511325	NoDiff
Cluster_102681	5	26501840	26502398	24	5'-2k	Zm00001d013964	59.1045	NoDiff	26	2.57029	NoDiff	31	0.321183	NoDiff	159	0.022054	NIM
Cluster_102682	5	26503011	26503439	24	5'-2k	Zm00001d013964	-0.105544	AE	33	1.76971	NoDiff	17	2.45943	NoDiff	86	-0.426357	NIM
Cluster_102685	5	26539118	26539909	24	5'-2k	Zm00001d013966	-0.428371	NoDiff	94	1.25182	NoDiff	72	1.25975	TCM	199	0.337464	NoDiff
Cluster_102687	5	26546240	26546830	24	TE	-	-0.48882	AE	41	6.39123	NoDiff	16	1.55809	NoDiff	141	-0.612776	TCdM
Cluster_102689	5	26609038	26609811	24	3'-2k	Zm00001d013967	0.00439573	NoDiff	32	24.778	NoDiff	36	5.62531	NoDiff	168	-1.01333	NoDiff
Cluster_10269	1	94339906	94340539	24	Gene body	Zm00001d029918	-0.242053	NoDiff	9	0.711758	NoDiff	3	1.0216	NoDiff	92	-0.183907	NoDiff
Cluster_102693	5	26641207	26641467	24	TE	-	-2.06135	NoDiff	0	0	NoDiff	0	0.641586	NoDiff	0	1.53744	NoDiff
Cluster_102694	5	26641586	26641980	24	Intergenic	-	-0.277084	AE	11	-1.07998	TCdM	16	0.289197	NoDiff	56	-0.562071	TCdM
Cluster_1027	1	7694466	7695503	24	Gene body	Zm00001d027536	-3.55684	TLPE	36	0.614741	NoDiff	63	2.83454	NoDiff	174	0.460995	NoDiff
Cluster_10270	1	94350406	94350543	24	3'-2k	Zm00001d029919	-0.238031	AE	0	0.334592	NoDiff	2	0.663138	TCM	22	0.390458	NIM
Cluster_102702	5	26679601	26679859	24	Intergenic	-	0.163964	AE	4	-0.126911	NoDiff	3	-0.441855	NoDiff	35	-0.98675	TCdM
Cluster_102703	5	26683947	26684408	24	TE	-	-0.176917	NoDiff	14	-0.461301	NoDiff	16	0.0262268	NoDiff	121	-0.639816	NoDiff
Cluster_102706	5	26685736	26686329	24	TE	-	0.290803	AE	58	-0.0130411	NoDiff	39	-0.497976	NIM	154	-1.15633	NoDiff
Cluster_102707	5	26704624	26705105	24	TE	-	-0.740641	DLPE	30	-13.3899	NoDiff	20	-0.395469	NoDiff	54	0.56805	NoDiff
Cluster_102708	5	26705203	26706502	24	TE	-	0.0362569	AE	114	0.379267	NIM	87	0.322717	NIM	285	0.0807945	NoDiff
Cluster_102709	5	26708510	26709598	24	Other	-	4.70111	NoDiff	50	-0.534813	NoDiff	91	2.0539	NoDiff	297	0.555043	NoDiff
Cluster_10271	1	94359533	94359733	24	TE	-	-0.425308	NoDiff	0	0	NoDiff	0	0	NoDiff	0	0	NoDiff
Cluster_102711	5	26715350	26716068	24	Intergenic	-	0.137308	NoDiff	49	-0.532225	NoDiff	36	1.71586	NoDiff	151	0.795651	NoDiff
Cluster_102712	5	26716878	26717333	24	Intergenic	-	1.29981	NoDiff	16	-0.244254	NoDiff	65	0.366819	NoDiff	125	0.496771	NIM
Cluster_102715	5	26723367	26724123	24	5'-2k	Zm00001d013971	0.436696	NoDiff	46	-8.63868	NoDiff	31	-3.33769	NoDiff	167	-0.713653	NoDiff
Cluster_102716	5	26741352	26742077	24	TE	-	-0.554959	DLPE	58	-0.381348	NIM	42	-0.38814	NIM	227	-0.0143085	NIM
Cluster_102718	5	26743486	26744365	24	Intergenic	-	-0.450568	NoDiff	53	1.11951	NoDiff	74	1.2078	NoDiff	220	1.7651	NoDiff
Cluster_102719	5	26747901	26748312	24	TE	-	0.660968	NoDiff	27	0.298217	NoDiff	8	-1.52479	NoDiff	133	-1.01567	TCdM
Cluster_10272	1	94360072	94360667	24	TE	-	0.162653	AE	0	0.987087	NoDiff	0	0.886055	NoDiff	0	-0.252756	NoDiff
Cluster_102720	5	26748456	26749027	24	TE	-	31.1167	NoDiff	3	-4.21282	NoDiff	2	-63.7207	NoDiff	30	-0.951834	TCdM
Cluster_102722	5	26760741	26761770	24	TE	-	-0.237509	AE	75	0.328951	NIM	54	0.550933	TCM	259	-3.23436	TCdM
Cluster_102724	5	26785503	26786257	24	TE	-	-0.433242	NoDiff	82	-0.524563	NoDiff	68	0.417963	NoDiff	177	-0.880936	NoDiff
Cluster_102726	5	26882972	26883404	24	5'-2k	Zm00001d013974	-1.20098	NoDiff	22	0.603287	NoDiff	22	1.20478	NoDiff	59	-0.578541	TCdM
Cluster_102727	5	26884153	26885345	24	Other	-	-6.01899	NoDiff	116	0.405165	NoDiff	88	-0.14101	NoDiff	292	1.04942	NoDiff
Cluster_102730	5	26944392	26944997	24	3'-2k	Zm00001d013976	0.0510094	NoDiff	28	1.22104	NoDiff	33	2.32348	NoDiff	130	-0.455735	NIM
Cluster_102731	5	26947587	26947803	24	Gene body	Zm00001d013976	-0.525117	NoDiff	24	0.363874	NoDiff	17	-0.242043	NoDiff	54	-0.78877	NoDiff
Cluster_102732	5	26950339	26951167	24	5'-2k	Zm00001d013976	1.20389	NoDiff	20	0.364675	NoDiff	29	2.36588	NoDiff	220	1.27888	NoDiff
Cluster_102734	5	26988396	26989249	24	3'-2k	Zm00001d013977	-1.38666	NoDiff	32	1.43979	NoDiff	20	1.32124	NoDiff	316	-1.46083	NoDiff
Cluster_102735	5	26991176	26992417	24	5'-2k	Zm00001d013977	0.62454	NoDiff	70	18.4203	NoDiff	60	1.90187	NoDiff	282	-0.579215	NoDiff
Cluster_102736	5	27037421	27038508	24	TE	-	0.300712	NoDiff	84	-3.86925	NoDiff	76	-0.30352	NoDiff	210	0.336886	NoDiff
Cluster_102737	5	27039921	27040958	24	Intergenic	-	-2.43427	NoDiff	78	-2.35042	NoDiff	45	-1.31145	NoDiff	292	0.972279	NoDiff
Cluster_102738	5	27044965	27045248	24	Intergenic	-	0.164839	AE	58	3.04158	NoDiff	36	20.7047	NoDiff	69	0.394616	NoDiff
Cluster_102739	5	27069417	27070043	24	5'-2k	Zm00001d013979	0.803174	NoDiff	67	0.702857	NoDiff	65	1.56077	NoDiff	182	-2.04852	NoDiff
Cluster_10274	1	94364052	94364276	24	TE	-	1.26449	NoDiff	4	0.98697	NoDiff	4	1.25156	NoDiff	5	-0.737142	NoDiff
Cluster_102741	5	27167933	27168218	24	TE	-	0.304038	AE	0	0.940349	NoDiff	0	0.769544	NoDiff	0	0.837607	NoDiff
Cluster_102745	5	27203563	27204310	24	Intergenic	-	-0.178141	AE	15	0.509383	TCM	16	0.359949	NoDiff	199	-3.75914	NoDiff
Cluster_102746	5	27204453	27204918	24	Intergenic	-	-0.173312	AE	15	0.274389	NoDiff	18	1.07899	NoDiff	130	0.346015	NoDiff
Cluster_102747	5	27205618	27206201	24	Intergenic	-	4.18477	NoDiff	43	0.184338	NIM	44	0.080746	NIM	160	0.308867	NoDiff
Cluster_102749	5	27224992	27225802	24	3'-2k	Zm00001d013982	0.253537	AE	3	0.722943	NoDiff	4	0.594895	NoDiff	30	-0.658368	NoDiff
Cluster_102750	5	27235776	27236929	24	5'-2k	Zm00001d013982	0.0753019	NoDiff	65	4.12529	NoDiff	68	2.22181	NoDiff	224	-3.21412	NoDiff
Cluster_102753	5	27239847	27240228	24	Intergenic	-	-0.558805	NoDiff	20	-0.105755	NoDiff	17	-4.62693	NoDiff	122	0.205445	NoDiff
Cluster_102754	5	27240752	27241089	24	Intergenic	-	0.210159	AE	46	1.35085	NoDiff	33	4.35114	NoDiff	96	-0.702319	NoDiff
Cluster_102755	5	27292804	27293338	24	3'-2k	Zm00001d013983	0.0326097	AE	29	1.58638	NoDiff	22	3.51854	NoDiff	155	-0.329905	NoDiff
Cluster_102756	5	27293766	27294434	24	3'-2k	Zm00001d013983	-0.00242285	AE	46	0.0643879	NIM	24	0.0682424	NIM	129	-0.167765	NIM
Cluster_102757	5	27297956	27298865	24	3'-2k	Zm00001d013984	0.449623	NoDiff	7	-0.650835	NoDiff	32	-0.493161	NoDiff	196	0.0437488	NIM
Cluster_102758	5	27299223	27299588	24	5'-2k	Zm00001d013983	2.63566	NoDiff	5	1.65779	NoDiff	1	10.7204	NoDiff	93	0.649821	TCM
Cluster_102759	5	27301410	27305082	24	Gene body	Zm00001d013984	0.201886	NoDiff	241	2.63949	NoDiff	145	0.300159	NIM	464	-0.111542	NoDiff
Cluster_102762	5	27306918	27307700	24	Gene body	Zm00001d013984	1.77506	NoDiff	4	1.00912	NoDiff	4	-1.12265	NoDiff	9	-0.113691	NoDiff
Cluster_102763	5	27308863	27309308	24	Gene body	Zm00001d013984	-0.35925	NoDiff	21	-10.4978	NoDiff	17	-0.976252	NoDiff	22	0.240355	NoDiff
Cluster_102764	5	27309502	27309767	24	Gene body	Zm00001d013984	173.496	NoDiff	19	1.02295	NoDiff	16	1.12745	NoDiff	28	0	NoDiff
Cluster_102767	5	27310553	27310914	24	Gene body	Zm00001d013984	1.76013	DHPE	17	-1.04604	NoDiff	12	-5.89061	NoDiff	12	1.51231	NoDiff
Cluster_102768	5	27311839	27313501	24	Gene body	Zm00001d013984	0.927329	NoDiff	60	18.3501	NoDiff	141	1.78588	NoDiff	363	-3.16576	NoDiff
Cluster_102769	5	27313633	27314054	24	Gene body	Zm00001d013984	1.41103	DHPE	13	4.77035	NoDiff	37	-2.125	NoDiff	133	-2.66019	NoDiff
Cluster_10277	1	94369288	94369572	24	Intergenic	-	0.530544	DHPE	0	1.0275	NoDiff	0	0.888295	NoDiff	0	1.02764	NoDiff
Cluster_102770	5	27314134	27316119	24	Gene body	Zm00001d013984	0.00460229	AE	62	-0.0381342	NoDiff	152	-0.175341	NIM	465	-0.637437	NoDiff
Cluster_102771	5	27316206	27317292	24	Gene body	Zm00001d013984	-0.273777	AE	32	-0.452007	NoDiff	47	0.252461	NIM	216	-1.69538	NoDiff
Cluster_102773	5	27323256	27324696	24	Gene body	Zm00001d013984	3.4357	NoDiff	66	-0.0854689	NoDiff	80	1.20466	NoDiff	339	0.690072	NoDiff
Cluster_102774	5	27324772	27326838	24	Gene body	Zm00001d013984	1.18879	NoDiff	149	0.0437134	NoDiff	106	1.47926	NoDiff	456	2.53977	NoDiff
Cluster_102775	5	27328702	27329659	24	5'-2k	Zm00001d013984	5.64633	THPE	129	-0.388193	NoDiff	86	-0.210668	NIM	241	0.701744	NoDiff
Cluster_102776	5	27329752	27330401	24	5'-2k	Zm00001d013984	2.08467	NoDiff	88	0.98047	NoDiff	46	0.487468	NoDiff	122	-1.39451	NoDiff
Cluster_102777	5	27330667	27331233	24	Intergenic	-	0.367792	NoDiff	26	0.270524	NoDiff	15	-0.934557	NoDiff	134	6.44786	NoDiff
Cluster_102780	5	27474057	27474675	24	5'-2k	Zm00001d013985	-4.71073	NoDiff	26	2.62017	NoDiff	32	-0.248055	NoDiff	215	-2.27679	NoDiff
Cluster_102781	5	27474869	27475142	24	5'-2k	Zm00001d013985	0.438253	AE	15	0.126198	NoDiff	15	0.560485	NoDiff	75	0.366755	NoDiff
Cluster_102782	5	27481775	27482908	24	Gene body	Zm00001d013985	8.24231	NoDiff	45	0.631142	NoDiff	45	-0.287273	NoDiff	314	-0.247649	NoDiff
Cluster_102783	5	27485752	27486506	24	3'-2k	Zm00001d013985	0.344927	NoDiff	39	0.15847	NoDiff	34	0.126477	NoDiff	187	-0.370696	NoDiff
Cluster_102786	5	27502318	27502612	24	5'-2k	Zm00001d013986	0.150026	AE	0	1.08064	NoDiff	0	0.984123	NoDiff	0	-1	NoDiff
Cluster_102787	5	27506875	27507365	24	3'-2k	Zm00001d013988	-0.42523	NoDiff	0	0.940921	NoDiff	0	0.939069	NoDiff	0	-0.718613	NoDiff
Cluster_102788	5	27507500	27507769	24	3'-2k	Zm00001d013988	-2.96702	TLPE	0	0.550182	NoDiff	0	0.538057	NoDiff	0	0	NoDiff
Cluster_102794	5	27670594	27671697	24	5'-2k	Zm00001d013989	1.26779	NoDiff	53	0.45621	NoDiff	25	0.496013	NoDiff	190	1.61066	NoDiff
Cluster_102795	5	27672012	27672680	24	5'-2k	Zm00001d013989	0.592192	DHPE	2	0.882016	NoDiff	0	1.00914	NoDiff	8	1.39926	TCM
Cluster_102796	5	27678150	27678613	24	Gene body	Zm00001d013989	-3.23674	NoDiff	8	0.503989	NoDiff	12	-1.01026	TCdM	52	-0.743522	NoDiff
Cluster_102797	5	27679555	27680133	24	Gene body	Zm00001d013989	-3.04092	NoDiff	35	-0.891883	NoDiff	26	-0.410974	NIM	136	0.177452	NoDiff
Cluster_102799	5	27681782	27682618	24	Gene body	Zm00001d013989	3.12459	NoDiff	36	2.27733	NoDiff	25	0.261563	NoDiff	276	-0.176715	NoDiff
Cluster_1028	1	7695638	7696697	24	Gene body	Zm00001d027536	0.364105	NoDiff	35	0.25969	NoDiff	77	0.222794	NIM	330	-0.215434	NoDiff
Cluster_10280	1	94400725	94401539	24	Intergenic	-	0.593619	DHPE	0	1.0684	NoDiff	0	0.734008	NoDiff	0	-0.0964973	NoDiff
Cluster_102800	5	27687806	27688266	24	3'-2k	Zm00001d013989	-0.406975	NoDiff	0	0.793752	NoDiff	2	0.804725	NoDiff	7	-0.320621	NoDiff
Cluster_102801	5	27688555	27691479	24	5'-2k	Zm00001d013990	0.0652969	AE	32	0.894994	TCM	47	0.120751	NoDiff	183	-0.263327	NoDiff
Cluster_102803	5	27696006	27696213	24	5'-2k	Zm00001d013991	-0.101057	AE	9	-7.87107	NoDiff	5	0.0454406	NoDiff	35	-0.85537	TCdM
Cluster_102804	5	27696631	27697453	24	Intergenic	-	-0.822017	DLPE	19	0.363143	NoDiff	16	-1.05766	NoDiff	89	-0.409933	NIM
Cluster_102808	5	27753182	27753750	24	Intergenic	-	0.345343	AE	50	3.75983	NoDiff	24	0.00421966	NoDiff	184	-0.341933	NoDiff
Cluster_10281	1	94414801	94415018	24	TE	-	2.43692	THPE	5	-1.19163	NoDiff	5	-9.64638	NoDiff	9	2.17973	NoDiff
Cluster_102810	5	27759946	27760379	24	Gene body	Zm00001d013992	0.694523	DHPE	9	0.779347	TCM	14	0.0353645	NoDiff	68	-0.368359	NoDiff
Cluster_102811	5	27761539	27761747	24	3'-2k	Zm00001d013992	-0.910397	DLPE	3	-0.806784	NoDiff	3	-0.520037	NoDiff	24	-0.601125	TCdM
Cluster_102812	5	27761950	27762477	24	TE	-	-0.591644	DLPE	7	0.804625	TCM	5	-0.0483584	NoDiff	89	0.0650755	NoDiff
Cluster_102813	5	27763410	27764388	24	TE	-	-0.346357	AE	11	0.542194	NoDiff	13	-0.523759	TCdM	84	-1.22855	NoDiff
Cluster_102815	5	27786290	27786471	24	Intergenic	-	-0.763852	NoDiff	0	1.5375	NoDiff	0	0.165246	NoDiff	0	0.485803	NoDiff
Cluster_102816	5	27789221	27789456	24	5'-2k	Zm00001d013993	-0.324396	AE	0	0	NoDiff	0	0	NoDiff	0	0	NoDiff
Cluster_102818	5	27841338	27841771	24	3'-2k	Zm00001d013996	-0.0755079	AE	0	1.00844	NoDiff	0	0.719496	NoDiff	0	0.972628	NoDiff
Cluster_102819	5	27846316	27847041	24	Gene body	Zm00001d013996	-0.538394	NoDiff	29	-1.22947	NoDiff	38	-0.698877	NoDiff	132	3.97902	NoDiff
Cluster_10282	1	94415337	94415576	24	TE	-	-0.15511	AE	0	0.522098	NoDiff	0	0.59115	NoDiff	0	-0.304672	NoDiff
Cluster_102820	5	27848043	27848644	24	5'-2k	Zm00001d013996	-0.00144097	AE	5	-0.211	NoDiff	2	-1.96678	NoDiff	54	0.760095	TCM
Cluster_102821	5	27849356	27850613	24	5'-2k	Zm00001d013996	-0.116642	AE	59	-0.0521223	NoDiff	52	-0.464492	NoDiff	385	0.420241	NoDiff
Cluster_102822	5	27851711	27852060	24	Intergenic	-	-0.114295	AE	27	0.510432	NoDiff	12	0.0166084	NoDiff	86	-0.475163	NIM
Cluster_102823	5	27852320	27852490	24	Intergenic	-	-0.407836	NoDiff	4	-0.278929	NoDiff	2	-16.0238	NoDiff	16	-0.209519	NIM
Cluster_102824	5	27881809	27882677	24	Intergenic	-	0.168754	AE	6	0.639151	TCM	4	0.385881	NoDiff	25	1.0087	TCM
Cluster_102825	5	27903243	27903989	24	Intergenic	-	-0.0906891	AE	0	1.56002	NoDiff	0	1.31089	NoDiff	0	0.958275	NoDiff
Cluster_102826	5	27904871	27905810	24	3'-2k	Zm00001d013997	0.00890437	AE	15	-0.914406	NoDiff	7	-0.854008	TCdM	32	0.165262	NoDiff
Cluster_102827	5	27907127	27908445	24	Gene body	Zm00001d013997	-0.0733303	AE	81	2.04628	NoDiff	74	-0.15023	NoDiff	353	-0.481208	NIM
Cluster_102828	5	27910568	27910814	24	5'-2k	Zm00001d013997	-0.285286	NoDiff	8	-3.31853	NoDiff	7	1.46842	NoDiff	48	0.321628	NoDiff
Cluster_102830	5	27926064	27926328	24	Intergenic	-	0.25363	AE	24	4.40013	NoDiff	11	0.438155	NoDiff	68	0.735029	NoDiff
Cluster_102831	5	27926585	27926981	24	Intergenic	-	-2.05752	NoDiff	0	0	NoDiff	0	0	NoDiff	0	0	NoDiff
Cluster_102832	5	27927068	27927263	24	Intergenic	-	-0.587455	NoDiff	0	-1	NoDiff	0	-2.86667	NoDiff	0	-1	NoDiff
Cluster_102834	5	27929095	27929532	24	Intergenic	-	403.851	THPE	34	0.276538	NoDiff	17	-1.70055	NoDiff	110	0.00105748	NIM
Cluster_102835	5	27930734	27931129	24	Intergenic	-	0.0431913	NoDiff	6	-2.0105	NoDiff	25	8.20875	NoDiff	80	0.207893	NoDiff
Cluster_102836	5	27931921	27932355	24	Intergenic	-	-1.04846	NoDiff	29	0.0456148	NoDiff	18	-0.221788	NoDiff	92	-2.12182	NoDiff
Cluster_102838	5	27951246	27951471	24	Intergenic	-	-0.614652	DLPE	6	-0.996469	NoDiff	7	-0.624868	TCdM	50	-0.841624	TCdM
Cluster_102840	5	27984024	27984641	24	Intergenic	-	-0.275078	AE	28	-0.0552969	NoDiff	20	-7.75172	NoDiff	198	0.108913	NIM
Cluster_102844	5	28021081	28021441	24	TE	-	-0.752278	DLPE	23	1.32266	NoDiff	19	0.650318	NoDiff	58	-1.11107	NoDiff
Cluster_102846	5	28052085	28052736	24	TE	-	3.26878	NoDiff	31	-1.82639	NoDiff	15	0.695469	NoDiff	92	-2.22124	NoDiff
Cluster_102849	5	28084603	28085217	24	Intergenic	-	0.295649	NoDiff	15	-9.03428	NoDiff	19	-12.1979	NoDiff	144	1.21262	NoDiff
Cluster_10285	1	94472461	94472906	24	5'-2k	Zm00001d029921	-0.196775	AE	0	0.914698	NoDiff	0	0.518885	NoDiff	0	0.324375	NoDiff
Cluster_102851	5	28086508	28086772	24	5'-2k	Zm00001d013999	1.30299	NoDiff	8	-0.415157	NoDiff	6	0.928134	NoDiff	71	0.112129	NIM
Cluster_102852	5	28104290	28105511	24	Intergenic	-	0.46381	AE	20	0.284817	NIM	20	0.351851	NIM	156	-0.557469	NoDiff
Cluster_102853	5	28129089	28129519	24	Intergenic	-	-0.237139	NoDiff	4	0.177401	NoDiff	12	0.262666	NIM	27	0.0672444	NoDiff
Cluster_102854	5	28134763	28135585	24	Intergenic	-	-0.1346	AE	40	0.394921	NoDiff	35	-2.76231	NoDiff	109	-0.176357	NoDiff
Cluster_102855	5	28136066	28136432	24	TE	-	-0.254645	AE	0	0.856567	NoDiff	0	0.804822	NoDiff	3	0.270927	NoDiff
Cluster_102856	5	28151501	28151822	24	Intergenic	-	0.906321	DHPE	31	-0.108649	NIM	20	-0.107184	NIM	95	-0.295637	NIM
Cluster_102857	5	28152008	28152857	24	Intergenic	-	-0.626104	DLPE	0	1.12309	NoDiff	0	1.2886	NoDiff	0	-0.003369	NoDiff
Cluster_102858	5	28153281	28153493	24	TE	-	0.136458	AE	0	0.858034	NoDiff	0	0.998826	NoDiff	0	0.220936	NoDiff
Cluster_10286	1	94476709	94476829	24	3'-2k	Zm00001d029921	-0.334181	NoDiff	0	0	NoDiff	0	0	NoDiff	0	0	NoDiff
Cluster_102861	5	28199419	28200094	24	Intergenic	-	0.196518	AE	51	0.123988	NIM	36	-0.182828	NoDiff	171	-0.772676	TCdM
Cluster_102862	5	28200393	28200562	24	Intergenic	-	-0.87562	DLPE	10	-0.204757	NIM	7	-0.888394	TCdM	19	-0.660851	TCdM
Cluster_102863	5	28201713	28202344	24	Intergenic	-	0.0522851	AE	49	0.0736862	NIM	33	-0.0369952	NoDiff	175	-0.429397	NoDiff
Cluster_102866	5	28211099	28211436	24	5'-2k	Zm00001d014001	0.488499	AE	21	0.118463	NoDiff	15	11.0414	NoDiff	82	-0.274354	NIM
Cluster_102869	5	28225367	28226173	24	Intergenic	-	-0.0306591	AE	55	-0.0391062	NIM	36	0.416104	NoDiff	188	-0.798683	NoDiff
Cluster_10287	1	94478614	94478966	24	3'-2k	Zm00001d029922	0.597465	DHPE	0	-1	NoDiff	0	-1.58193	NoDiff	0	-1.8251	NoDiff
Cluster_102870	5	28227863	28228113	24	Intergenic	-	-0.25979	AE	16	-1.00177	NoDiff	20	0.913713	NoDiff	86	0.220399	NoDiff
Cluster_102871	5	28239806	28240424	24	TE	-	0.199395	AE	45	0.991037	NoDiff	51	0.967963	NoDiff	171	0.477261	NoDiff
Cluster_102872	5	28241273	28241801	24	Intergenic	-	0.59433	DHPE	20	0.824462	NoDiff	5	0.338844	NoDiff	151	2.38162	NoDiff
Cluster_102874	5	28242346	28242926	24	Intergenic	-	-0.654007	DLPE	40	0.844094	NoDiff	26	0.832179	NoDiff	150	-0.51331	NoDiff
Cluster_102875	5	28267069	28267922	24	Intergenic	-	-0.0686013	AE	41	-0.160883	NoDiff	48	0.655439	NoDiff	222	-0.0532263	NoDiff
Cluster_102877	5	28272620	28273675	24	5'-2k	Zm00001d014003	-0.0982758	AE	103	1.09136	NoDiff	74	1.00658	NoDiff	217	1.24799	NoDiff
Cluster_102878	5	28298418	28298528	24	Gene body	Zm00001d014005	-0.135623	AE	2	-8.73115	NoDiff	1	0.724738	NoDiff	7	0.0312315	NIM
Cluster_102879	5	28298616	28299237	24	Gene body	Zm00001d014005	0.285218	AE	15	0.577744	NoDiff	14	0.923236	NoDiff	124	-0.394531	NIM
Cluster_10288	1	94562460	94562841	24	TE	-	4.23149	NoDiff	24	1.18354	NoDiff	29	1.34038	NoDiff	85	2.03646	NoDiff
Cluster_102881	5	28302060	28302307	24	3'-2k	Zm00001d014005	-0.208576	AE	0	0	NoDiff	0	0	NoDiff	0	0	NoDiff
Cluster_102882	5	28302544	28302724	24	3'-2k	Zm00001d014005	-2.04554	NoDiff	23	4.24465	NoDiff	21	1.40206	TCM	35	-12.511	TCdM
Cluster_102883	5	28302878	28303402	24	3'-2k	Zm00001d014005	0.171064	AE	3	0.533957	NoDiff	5	9.33979	NoDiff	126	0.238284	NIM
Cluster_102884	5	28356898	28357184	24	Intergenic	-	-5.50704	NoDiff	46	0.290776	NoDiff	40	1.4138	NoDiff	32	0.0181116	NoDiff
Cluster_102885	5	28381275	28381845	24	3'-2k	Zm00001d014006	0.697729	NoDiff	31	0.298949	NoDiff	21	0.00727374	NoDiff	121	-3.43252	NoDiff
Cluster_102887	5	28473163	28474290	24	Intergenic	-	0.536519	NoDiff	59	3.63205	NoDiff	74	0.740869	NoDiff	302	2.9062	NoDiff
Cluster_102889	5	28482758	28483037	24	Other	-	0.68917	DHPE	22	-0.562024	TCdM	7	-0.83792	TCdM	20	0	NoDiff
Cluster_102890	5	28483477	28483821	24	Other	-	0.255789	AE	13	-1.28279	NoDiff	6	2.96306	NoDiff	37	-0.147812	NoDiff
Cluster_102892	5	28486342	28486572	24	TE	-	0.0838688	AE	14	0.499421	NoDiff	12	-0.0246851	NoDiff	57	0.38357	NIM
Cluster_102893	5	28487248	28487728	24	TE	-	8.86999	NoDiff	12	1.56371	NoDiff	3	-8.76	NoDiff	2	2.46452	NoDiff
Cluster_102896	5	28503345	28503553	24	Intergenic	-	0.732852	NoDiff	10	0.800714	NoDiff	4	1.57401	NoDiff	32	1.16473	NoDiff
Cluster_102897	5	28503890	28504867	24	Intergenic	-	-2.74834	NoDiff	57	3.62459	NoDiff	63	3.76225	NoDiff	248	-0.553596	TCdM
Cluster_102898	5	28505562	28506572	24	Intergenic	-	-0.307369	AE	81	0.786083	NoDiff	60	11.2728	NoDiff	274	11.0659	NoDiff
Cluster_102899	5	28507505	28508278	24	Intergenic	-	-0.0745028	AE	48	17.7972	NoDiff	48	-0.460365	NoDiff	227	0.750542	TCM
Cluster_1029	1	7701635	7701917	24	5'-2k	Zm00001d027536	-0.0368362	AE	12	1.10424	NoDiff	22	1.08547	NoDiff	83	0.487985	NoDiff
Cluster_102901	5	28543012	28544239	24	5'-2k	Zm00001d014011	-0.022809	AE	100	0.914882	NoDiff	108	1.62637	NoDiff	260	-36.186	NoDiff
Cluster_102904	5	28552120	28552271	24	3'-2k	Zm00001d014011	33.8773	THPE	0	0	NoDiff	0	0	NoDiff	0	0	NoDiff
Cluster_102908	5	28590406	28590779	24	Intergenic	-	-0.524718	DLPE	0	0.97512	NoDiff	0	1.01338	NoDiff	0	0.0801834	NoDiff
Cluster_102909	5	28592356	28593452	24	Intergenic	-	-0.322924	AE	1	0.787934	NoDiff	0	0.763791	NoDiff	9	0.0839423	NoDiff
Cluster_10291	1	94566959	94567159	24	TE	-	0.222906	AE	2	-0.173604	NoDiff	2	-5.93817	NoDiff	9	-8.96858	NoDiff
Cluster_102911	5	28593896	28594270	24	Intergenic	-	-0.21408	AE	2	0.947894	NoDiff	4	0.773842	TCM	8	0.75685	NoDiff
Cluster_102912	5	28594641	28595047	24	TE	-	-0.639788	DLPE	5	0.153305	NIM	11	0.750067	TCM	39	0.109141	NIM
Cluster_102915	5	28632757	28634410	24	3'-2k	Zm00001d014013	0.556697	NoDiff	123	-0.480874	NoDiff	86	-2.58473	NoDiff	278	-0.798131	NoDiff
Cluster_102918	5	28640522	28641598	24	5'-2k	Zm00001d014013	1.08515	NoDiff	90	-0.490346	NoDiff	86	-0.879805	NoDiff	245	-7.94888	NoDiff
Cluster_102922	5	28706888	28707707	24	Intergenic	-	1.9011	NoDiff	68	-0.384842	NoDiff	41	0.516696	NoDiff	240	-48.1725	NoDiff
Cluster_102923	5	28708802	28709531	24	Intergenic	-	4.98895	NoDiff	47	5.10977	NoDiff	32	1.62529	NoDiff	161	0.437919	NIM
Cluster_102924	5	28710388	28711568	24	Intergenic	-	1.38924	NoDiff	130	0.105952	NIM	94	0.0215895	NIM	300	-1.1228	TCdM
Cluster_102926	5	28712680	28713052	24	Intergenic	-	0.220982	NoDiff	8	0.518384	NoDiff	23	-0.15811	NoDiff	92	0.0441735	NoDiff
Cluster_102927	5	28713162	28713982	24	TE	-	2.26124	NoDiff	70	0.45578	NoDiff	59	0.508468	NoDiff	202	0.244061	NoDiff
Cluster_102928	5	28718019	28718328	24	TE	-	-0.869238	DLPE	37	0.271932	NoDiff	34	0.377611	NoDiff	97	-1.33932	NoDiff
Cluster_10293	1	94649991	94650439	24	5'-2k	Zm00001d029924	0.142019	AE	10	-0.153459	NoDiff	2	1.31413	NoDiff	57	-0.500308	NoDiff
Cluster_102930	5	28719977	28720209	24	Intergenic	-	-0.634701	DLPE	10	-0.872116	NoDiff	2	0.26035	NoDiff	62	-0.577737	TCdM
Cluster_102931	5	28720313	28720584	24	Intergenic	-	2.6043	NoDiff	26	-0.894165	NoDiff	17	3.07125	NoDiff	67	0.26426	NIM
Cluster_102932	5	28752428	28753095	24	Intergenic	-	1.06477	NoDiff	30	0.34935	NoDiff	34	0.280663	NoDiff	207	-8.35912	NoDiff
Cluster_102933	5	28753347	28753732	24	Intergenic	-	-0.104277	NoDiff	37	-0.0231737	NIM	25	0.264621	NoDiff	101	0.964792	TCM
Cluster_102934	5	28754414	28754818	24	Intergenic	-	0.149019	AE	25	0.434263	NoDiff	39	0.672183	NoDiff	85	0.657322	NoDiff
Cluster_102935	5	28756611	28757093	24	TE	-	0.0610037	AE	26	1.14977	NoDiff	51	0.983159	NoDiff	107	0.651265	NoDiff
Cluster_102938	5	28775887	28776254	24	3'-2k	Zm00001d014015	1.00196	DHPE	26	0.171089	NoDiff	21	-0.710834	NoDiff	80	-2.37104	NoDiff
Cluster_102939	5	28776562	28776898	24	3'-2k	Zm00001d014015	2.92101	NoDiff	49	2.22908	NoDiff	25	0.923069	NoDiff	43	2.23928	NoDiff
Cluster_10294	1	94653379	94653726	24	Gene body	Zm00001d029924	0.680638	DHPE	0	0.467142	NoDiff	0	0.76102	NoDiff	0	4.41073	NoDiff
Cluster_102940	5	28777267	28777468	24	3'-2k	Zm00001d014015	0.514775	DHPE	18	0.886477	TCM	15	1.23763	NoDiff	33	2.21072	TCM
Cluster_102941	5	28778587	28779257	24	5'-2k	Zm00001d014015	-0.216329	AE	54	1.09171	NoDiff	35	1.16197	NoDiff	173	3.17176	NoDiff
Cluster_102943	5	28798652	28799168	24	3'-2k	Zm00001d014016	-0.887932	NoDiff	60	0.951943	NoDiff	45	1.15585	NoDiff	122	0.0295605	NoDiff
Cluster_102944	5	28799526	28799759	24	3'-2k	Zm00001d014016	0.169477	NoDiff	30	1.11392	NoDiff	21	1.47343	NoDiff	64	1.22091	NoDiff
Cluster_102945	5	28806711	28807177	24	TE	-	0.116195	AE	0	1.23562	TCM	0	1.10984	NoDiff	0	1.18548	NoDiff
[truncated: 117,519 more rows]
