# Supplementary material for: Integrated Multi-Omics Reveals Significant Roles of Non-Additively Expressed Small RNAs in Heterosis for Maize Plant Height
Source: Int J Mol Sci. 2023 May 23;24(11):9150. doi: 10.3390/ijms24119150 (PMC10252383; doi:10.3390/ijms24119150)
Supplement: Supplementary file 1 [file ijms-24-09150-s001.zip › Table-S7.xlsx]

## Sheet: New
Table S7. The protein-coding gene-associated siRNA clusters belonging to the six focused groups.
Group	siRNA_ID	Expression_Pattern_of_siRNA	Context	C_site	Meth_Pattern	Feature	GeneID	D/A_ratio_of_gene	Expression_Pattern_of_gene
CG-HPE-TCM	Cluster_30718	HPE	CG	5	TCM	Gene body	Zm00001d001865	-0.76591	DLPE
CG-HPE-TCM	Cluster_31617	HPE	CG	26	TCM	3'-2k	Zm00001d002213	0.30869	NoDiff
CG-HPE-TCM	Cluster_32256	HPE	CG	12	TCM	5'-2k	Zm00001d002441	41.2474	NoDiff
CG-HPE-TCM	Cluster_34952	HPE	CG	6	TCM	5'-2k	Zm00001d003197	-0.919836	NoDiff
CG-HPE-TCM	Cluster_35720	HPE	CG	56	TCM	5'-2k	Zm00001d003401	0.453453	NoDiff
CG-HPE-TCM	Cluster_39354	HPE	CG	28	TCM	Gene body	Zm00001d004167	-0.485709	AE
CG-HPE-TCM	Cluster_41200	HPE	CG	7	TCM	3'-2k	Zm00001d004527	-1	NoDiff
CG-HPE-TCM	Cluster_43301	HPE	CG	6	TCM	5'-2k	Zm00001d004898	2.95931	NoDiff
CG-HPE-TCM	Cluster_44349	HPE	CG	12	TCM	Gene body	Zm00001d005147	-0.0638095	AE
CG-HPE-TCM	Cluster_44817	HPE	CG	18	TCM	Gene body	Zm00001d005248	2.70779	NoDiff
CG-HPE-TCM	Cluster_45208	HPE	CG	4	TCM	3'-2k	Zm00001d005328	0.865423	NoDiff
CG-HPE-TCM	Cluster_45490	HPE	CG	4	TCM	5'-2k	Zm00001d005403	0.168357	NoDiff
CG-HPE-TCM	Cluster_46907	HPE	CG	35	TCM	3'-2k	Zm00001d005761	NA	NoDiff
CG-HPE-TCM	Cluster_46925	HPE	CG	55	TCM	3'-2k	Zm00001d005764	-2.74707	NoDiff
CG-HPE-TCM	Cluster_47342	HPE	CG	24	TCM	3'-2k	Zm00001d005850	NA	NoDiff
CG-HPE-TCM	Cluster_48835	HPE	CG	6	TCM	Gene body	Zm00001d006307	0.424616	NoDiff
CG-HPE-TCM	Cluster_50234	HPE	CG	22	TCM	3'-2k	Zm00001d006727	0.0980907	NoDiff
CG-HPE-TCM	Cluster_50397	HPE	CG	49	TCM	5'-2k	Zm00001d006787	-0.675453	NoDiff
CG-HPE-TCM	Cluster_53074	HPE	CG	42	TCM	5'-2k	Zm00001d007679	5.73924	NoDiff
CG-HPE-TCM	Cluster_53890	HPE	CG	8	TCM	5'-2k	Zm00001d007973	0.732339	NoDiff
CG-HPE-TCM	Cluster_154718	HPE	CG	19	TCM	3'-2k	Zm00001d008295	0.631884	NoDiff
CG-HPE-TCM	Cluster_156378	HPE	CG	35	TCM	5'-2k	Zm00001d008793	-1.78555	NoDiff
CG-HPE-TCM	Cluster_166685	HPE	CG	12	TCM	5'-2k	Zm00001d011262	NA	NoDiff
CG-HPE-TCM	Cluster_166969	HPE	CG	92	TCM	5'-2k	Zm00001d011350	1.07866	NoDiff
CG-HPE-TCM	Cluster_167153	HPE	CG	24	TCM	3'-2k	Zm00001d011395	0.376269	NoDiff
CG-HPE-TCM	Cluster_167710	HPE	CG	30	TCM	3'-2k	Zm00001d011537	NA	NoDiff
CG-HPE-TCM	Cluster_167855	HPE	CG	84	TCM	5'-2k	Zm00001d011576	2.28996	NoDiff
CG-HPE-TCM	Cluster_169308	HPE	CG	19	TCM	3'-2k	Zm00001d011963	0.25365	NoDiff
CG-HPE-TCM	Cluster_169539	HPE	CG	16	TCM	5'-2k	Zm00001d012035	-1	NoDiff
CG-HPE-TCM	Cluster_169707	HPE	CG	10	TCM	3'-2k	Zm00001d012095	-0.297315	AE
CG-HPE-TCM	Cluster_170430	HPE	CG	51	TCM	3'-2k	Zm00001d012351	0.162876	AE
CG-HPE-TCM	Cluster_170949	HPE	CG	54	TCM	3'-2k	Zm00001d012524	-1	NoDiff
CG-HPE-TCM	Cluster_171710	HPE	CG	38	TCM	5'-2k	Zm00001d012779	6.46061	NoDiff
CG-HPE-TCM	Cluster_99515	HPE	CG	26	TCM	5'-2k	Zm00001d012921	0.0252807	NoDiff
CG-HPE-TCM	Cluster_99530	HPE	CG	32	TCM	5'-2k	Zm00001d012924	4.5834	NoDiff
CG-HPE-TCM	Cluster_99605	HPE	CG	47	TCM	5'-2k	Zm00001d012967	22.0004	NoDiff
CG-HPE-TCM	Cluster_99683	HPE	CG	104	TCM	5'-2k	Zm00001d013005	0.342172	NoDiff
CG-HPE-TCM	Cluster_100830	HPE	CG	52	TCM	3'-2k	Zm00001d013428	-0.983741	NoDiff
CG-HPE-TCM	Cluster_102279	HPE	CG	28	TCM	3'-2k	Zm00001d013859	6.71366	NoDiff
CG-HPE-TCM	Cluster_102940	HPE	CG	18	TCM	3'-2k	Zm00001d014015	0.108002	NoDiff
CG-HPE-TCM	Cluster_106458	HPE	CG	13	TCM	5'-2k	Zm00001d014765	-0.714029	DLPE
CG-HPE-TCM	Cluster_106700	HPE	CG	41	TCM	5'-2k	Zm00001d014839	NA	NoDiff
CG-HPE-TCM	Cluster_107131	HPE	CG	30	TCM	5'-2k	Zm00001d014954	-2.47169	NoDiff
CG-HPE-TCM	Cluster_107290	HPE	CG	16	TCM	Gene body	Zm00001d014991	-0.947983	NoDiff
CG-HPE-TCM	Cluster_108396	HPE	CG	13	TCM	5'-2k	Zm00001d015346	-17.7676	NoDiff
CG-HPE-TCM	Cluster_109451	HPE	CG	62	TCM	5'-2k	Zm00001d015578	0.853621	NoDiff
CG-HPE-TCM	Cluster_114055	HPE	CG	18	TCM	5'-2k	Zm00001d016473	-4.24779	NoDiff
CG-HPE-TCM	Cluster_115484	HPE	CG	24	TCM	5'-2k	Zm00001d016877	0.0378262	AE
CG-HPE-TCM	Cluster_116830	HPE	CG	10	TCM	Gene body	Zm00001d017294	-1.14848	NoDiff
CG-HPE-TCM	Cluster_116903	HPE	CG	47	TCM	5'-2k	Zm00001d017317	5.95408	NoDiff
CG-HPE-TCM	Cluster_117426	HPE	CG	38	TCM	5'-2k	Zm00001d017459	-0.89344	DLPE
CG-HPE-TCM	Cluster_119108	HPE	CG	12	TCM	Gene body	Zm00001d017937	-0.356796	AE
CG-HPE-TCM	Cluster_119575	HPE	CG	9	TCM	3'-2k	Zm00001d018073	NA	NoDiff
CG-HPE-TCM	Cluster_137897	HPE	CG	38	TCM	5'-2k	Zm00001d018712	-0.451131	NoDiff
CG-HPE-TCM	Cluster_140936	HPE	CG	76	TCM	Gene body	Zm00001d019497	-0.659679	NoDiff
CG-HPE-TCM	Cluster_143466	HPE	CG	28	TCM	5'-2k	Zm00001d019978	0.375162	NoDiff
CG-HPE-TCM	Cluster_144079	HPE	CG	16	TCM	5'-2k	Zm00001d020062	-6.79261	NoDiff
CG-HPE-TCM	Cluster_145719	HPE	CG	58	TCM	3'-2k	Zm00001d020409	0.114979	NoDiff
CG-HPE-TCM	Cluster_146621	HPE	CG	12	TCM	3'-2k	Zm00001d020544	3.43791	NoDiff
CG-HPE-TCM	Cluster_147046	HPE	CG	83	TCM	3'-2k	Zm00001d020622	-1.44103	NoDiff
CG-HPE-TCM	Cluster_147072	HPE	CG	32	TCM	5'-2k	Zm00001d020628	-0.60134	NoDiff
CG-HPE-TCM	Cluster_147499	HPE	CG	38	TCM	5'-2k	Zm00001d020711	0.451233	NoDiff
CG-HPE-TCM	Cluster_148777	HPE	CG	8	TCM	5'-2k	Zm00001d021049	NA	NoDiff
CG-HPE-TCM	Cluster_149599	HPE	CG	146	TCM	5'-2k	Zm00001d021316	-0.893661	NoDiff
CG-HPE-TCM	Cluster_150070	HPE	CG	26	TCM	5'-2k	Zm00001d021453	0.215381	NoDiff
CG-HPE-TCM	Cluster_150072	HPE	CG	4	TCM	5'-2k	Zm00001d021453	0.215381	NoDiff
CG-HPE-TCM	Cluster_150084	HPE	CG	15	TCM	5'-2k	Zm00001d021458	-0.290469	AE
CG-HPE-TCM	Cluster_150208	HPE	CG	13	TCM	Gene body	Zm00001d021488	2.23391	NoDiff
CG-HPE-TCM	Cluster_151565	HPE	CG	112	TCM	3'-2k	Zm00001d021814	NA	NoDiff
CG-HPE-TCM	Cluster_191979	HPE	CG	46	TCM	3'-2k	Zm00001d024314	-0.25727	AE
CG-HPE-TCM	Cluster_193378	HPE	CG	20	TCM	Gene body	Zm00001d024595	3.73062	NoDiff
CG-HPE-TCM	Cluster_194445	HPE	CG	12	TCM	3'-2k	Zm00001d024868	2.9536	NoDiff
CG-HPE-TCM	Cluster_196852	HPE	CG	66	TCM	5'-2k	Zm00001d025327	-4.77215	NoDiff
CG-HPE-TCM	Cluster_197365	HPE	CG	18	TCM	3'-2k	Zm00001d025437	-0.691675	NoDiff
CG-HPE-TCM	Cluster_198748	HPE	CG	61	TCM	Gene body	Zm00001d025836	0.43136	NoDiff
CG-HPE-TCM	Cluster_198840	HPE	CG	31	TCM	3'-2k	Zm00001d025872	-4.07665	NoDiff
CG-HPE-TCM	Cluster_199103	HPE	CG	8	TCM	5'-2k	Zm00001d025955	2.35598	NoDiff
CG-HPE-TCM	Cluster_199135	HPE	CG	20	TCM	3'-2k	Zm00001d025960	5.41672	NoDiff
CG-HPE-TCM	Cluster_199271	HPE	CG	36	TCM	3'-2k	Zm00001d026012	0.392292	NoDiff
CG-HPE-TCM	Cluster_199270	HPE	CG	93	TCM	3'-2k	Zm00001d026012	0.392292	NoDiff
CG-HPE-TCM	Cluster_199940	HPE	CG	22	TCM	3'-2k	Zm00001d026206	-2.79897	NoDiff
CG-HPE-TCM	Cluster_691	HPE	CG	74	TCM	5'-2k	Zm00001d027444	-0.406339	NoDiff
CG-HPE-TCM	Cluster_3376	HPE	CG	46	TCM	3'-2k	Zm00001d028167	-0.333813	NoDiff
CG-HPE-TCM	Cluster_4517	HPE	CG	8	TCM	3'-2k	Zm00001d028447	-0.0222025	NoDiff
CG-HPE-TCM	Cluster_4637	HPE	CG	44	TCM	3'-2k	Zm00001d028477	-9.18832	NoDiff
CG-HPE-TCM	Cluster_5672	HPE	CG	27	TCM	3'-2k	Zm00001d028782	-0.999838	NoDiff
CG-HPE-TCM	Cluster_6032	HPE	CG	6	TCM	5'-2k	Zm00001d028880	1.2207	NoDiff
CG-HPE-TCM	Cluster_6456	HPE	CG	25	TCM	3'-2k	Zm00001d028987	-1.03554	NoDiff
CG-HPE-TCM	Cluster_6730	HPE	CG	55	TCM	5'-2k	Zm00001d029059	3.43159	NoDiff
CG-HPE-TCM	Cluster_7949	HPE	CG	64	TCM	3'-2k	Zm00001d029378	-0.029372	NoDiff
CG-HPE-TCM	Cluster_9405	HPE	CG	34	TCM	3'-2k	Zm00001d029717	1.06137	NoDiff
CG-HPE-TCM	Cluster_9834	HPE	CG	66	TCM	3'-2k	Zm00001d029827	-0.821155	NoDiff
CG-HPE-TCM	Cluster_11517	HPE	CG	22	TCM	5'-2k	Zm00001d030194	1.20603	NoDiff
CG-HPE-TCM	Cluster_12324	HPE	CG	38	TCM	Gene body	Zm00001d030348	-0.621618	NoDiff
CG-HPE-TCM	Cluster_12561	HPE	CG	55	TCM	3'-2k	Zm00001d030393	0.738892	NoDiff
CG-HPE-TCM	Cluster_18573	HPE	CG	32	TCM	3'-2k	Zm00001d031952	0.191265	AE
CG-HPE-TCM	Cluster_19304	HPE	CG	18	TCM	3'-2k	Zm00001d032109	-4.10927	NoDiff
CG-HPE-TCM	Cluster_19861	HPE	CG	6	TCM	3'-2k	Zm00001d032223	-1.79953	NoDiff
CG-HPE-TCM	Cluster_21231	HPE	CG	18	TCM	5'-2k	Zm00001d032543	0.0983502	AE
CG-HPE-TCM	Cluster_21527	HPE	CG	89	TCM	5'-2k	Zm00001d032632	4.4006	NoDiff
CG-HPE-TCM	Cluster_22367	HPE	CG	32	TCM	5'-2k	Zm00001d032828	13.1696	THPE
CG-HPE-TCM	Cluster_24522	HPE	CG	33	TCM	Gene body	Zm00001d033297	-0.625015	NoDiff
CG-HPE-TCM	Cluster_24705	HPE	CG	25	TCM	3'-2k	Zm00001d033342	NA	NoDiff
CG-HPE-TCM	Cluster_26287	HPE	CG	16	TCM	3'-2k	Zm00001d033776	0.204621	NoDiff
CG-HPE-TCM	Cluster_26580	HPE	CG	46	TCM	3'-2k	Zm00001d033859	6.64582	NoDiff
CG-HPE-TCM	Cluster_28403	HPE	CG	64	TCM	3'-2k	Zm00001d034356	-1.94147	DLPE
CG-HPE-TCM	Cluster_29110	HPE	CG	14	TCM	3'-2k	Zm00001d034578	-0.59484	DLPE
CG-HPE-TCM	Cluster_29597	HPE	CG	40	TCM	5'-2k	Zm00001d034733	-0.595002	NoDiff
CG-HPE-TCM	Cluster_29985	HPE	CG	15	TCM	3'-2k	Zm00001d034859	-1.98383	NoDiff
CG-HPE-TCM	Cluster_126262	HPE	CG	97	TCM	5'-2k	Zm00001d036216	-5.40338	NoDiff
CG-HPE-TCM	Cluster_126466	HPE	CG	12	TCM	5'-2k	Zm00001d036275	-2.50051	NoDiff
CG-HPE-TCM	Cluster_127152	HPE	CG	36	TCM	5'-2k	Zm00001d036463	0.299343	AE
CG-HPE-TCM	Cluster_127494	HPE	CG	28	TCM	3'-2k	Zm00001d036570	-7.79238	NoDiff
CG-HPE-TCM	Cluster_127518	HPE	CG	21	TCM	5'-2k	Zm00001d036575	-1	NoDiff
CG-HPE-TCM	Cluster_127623	HPE	CG	14	TCM	5'-2k	Zm00001d036602	-0.870257	DLPE
CG-HPE-TCM	Cluster_128215	HPE	CG	47	TCM	Gene body	Zm00001d036736	-1.26769	NoDiff
CG-HPE-TCM	Cluster_128389	HPE	CG	18	TCM	3'-2k	Zm00001d036796	-0.624532	NoDiff
CG-HPE-TCM	Cluster_128741	HPE	CG	18	TCM	3'-2k	Zm00001d036878	1.23712	NoDiff
CG-HPE-TCM	Cluster_129111	HPE	CG	33	TCM	5'-2k	Zm00001d036993	0.555013	DHPE
CG-HPE-TCM	Cluster_130054	HPE	CG	29	TCM	3'-2k	Zm00001d037215	-1.2142	NoDiff
CG-HPE-TCM	Cluster_130199	HPE	CG	22	TCM	3'-2k	Zm00001d037243	9.53978	NoDiff
CG-HPE-TCM	Cluster_132687	HPE	CG	16	TCM	5'-2k	Zm00001d037787	-1.34244	NoDiff
CG-HPE-TCM	Cluster_133303	HPE	CG	47	TCM	5'-2k	Zm00001d037947	1.35546	NoDiff
CG-HPE-TCM	Cluster_133499	HPE	CG	45	TCM	3'-2k	Zm00001d037992	-0.303672	NoDiff
CG-HPE-TCM	Cluster_133549	HPE	CG	16	TCM	Gene body	Zm00001d038002	-0.0147277	NoDiff
CG-HPE-TCM	Cluster_135042	HPE	CG	39	TCM	5'-2k	Zm00001d038378	-0.428633	NoDiff
CG-HPE-TCM	Cluster_135930	HPE	CG	48	TCM	5'-2k	Zm00001d038673	-132.011	NoDiff
CG-HPE-TCM	Cluster_135950	HPE	CG	42	TCM	5'-2k	Zm00001d038682	-0.34685	NoDiff
CG-HPE-TCM	Cluster_136201	HPE	CG	63	TCM	5'-2k	Zm00001d038765	0.180171	AE
CG-HPE-TCM	Cluster_136495	HPE	CG	15	TCM	5'-2k	Zm00001d038861	-0.644674	NoDiff
CG-HPE-TCM	Cluster_136681	HPE	CG	6	TCM	5'-2k	Zm00001d038933	-0.0567148	NoDiff
CG-HPE-TCM	Cluster_137039	HPE	CG	22	TCM	5'-2k	Zm00001d039065	-0.712268	DLPE
CG-HPE-TCM	Cluster_137119	HPE	CG	46	TCM	3'-2k	Zm00001d039108	-1.1379	NoDiff
CG-HPE-TCM	Cluster_55257	HPE	CG	21	TCM	Gene body	Zm00001d039662	NA	NoDiff
CG-HPE-TCM	Cluster_55640	HPE	CG	132	TCM	3'-2k	Zm00001d039786	-2.39344	TLPE
CG-HPE-TCM	Cluster_56613	HPE	CG	73	TCM	Gene body	Zm00001d040046	-0.548749	NoDiff
CG-HPE-TCM	Cluster_56969	HPE	CG	37	TCM	5'-2k	Zm00001d040111	-0.604968	DLPE
CG-HPE-TCM	Cluster_59216	HPE	CG	32	TCM	3'-2k	Zm00001d040625	0.875592	NoDiff
CG-HPE-TCM	Cluster_59271	HPE	CG	10	TCM	5'-2k	Zm00001d040637	-0.341246	NoDiff
CG-HPE-TCM	Cluster_59900	HPE	CG	12	TCM	Gene body	Zm00001d040759	0.442201	AE
CG-HPE-TCM	Cluster_62405	HPE	CG	40	TCM	5'-2k	Zm00001d041277	1.01399	NoDiff
CG-HPE-TCM	Cluster_62575	HPE	CG	23	TCM	5'-2k	Zm00001d041331	-0.103127	AE
CG-HPE-TCM	Cluster_64295	HPE	CG	18	TCM	3'-2k	Zm00001d041750	-3.88096	NoDiff
CG-HPE-TCM	Cluster_64579	HPE	CG	19	TCM	3'-2k	Zm00001d041813	NA	NoDiff
CG-HPE-TCM	Cluster_67353	HPE	CG	43	TCM	5'-2k	Zm00001d042498	2.50257	NoDiff
CG-HPE-TCM	Cluster_67394	HPE	CG	24	TCM	3'-2k	Zm00001d042512	-0.660961	NoDiff
CG-HPE-TCM	Cluster_68899	HPE	CG	33	TCM	5'-2k	Zm00001d042862	-1.21622	DLPE
CG-HPE-TCM	Cluster_70334	HPE	CG	6	TCM	5'-2k	Zm00001d043235	-0.0957163	AE
CG-HPE-TCM	Cluster_71361	HPE	CG	15	TCM	3'-2k	Zm00001d043461	NA	NoDiff
CG-HPE-TCM	Cluster_72428	HPE	CG	9	TCM	5'-2k	Zm00001d043741	-0.751705	NoDiff
CG-HPE-TCM	Cluster_72564	HPE	CG	160	TCM	Gene body	Zm00001d043779	-1.94941	NoDiff
CG-HPE-TCM	Cluster_72570	HPE	CG	26	TCM	5'-2k	Zm00001d043781	-1.77552	NoDiff
CG-HPE-TCM	Cluster_73105	HPE	CG	32	TCM	3'-2k	Zm00001d043906	11.5626	NoDiff
CG-HPE-TCM	Cluster_73896	HPE	CG	23	TCM	Gene body	Zm00001d044091	1.08336	NoDiff
CG-HPE-TCM	Cluster_75308	HPE	CG	84	TCM	Gene body	Zm00001d044447	0.178834	AE
CG-HPE-TCM	Cluster_75920	HPE	CG	40	TCM	Gene body	Zm00001d044581	2.17051	NoDiff
CG-HPE-TCM	Cluster_171840	HPE	CG	26	TCM	Gene body	Zm00001d044729	1.36901	NoDiff
CG-HPE-TCM	Cluster_174013	HPE	CG	32	TCM	5'-2k	Zm00001d045322	-1.08554	NoDiff
CG-HPE-TCM	Cluster_174202	HPE	CG	12	TCM	3'-2k	Zm00001d045392	-1.85661	DLPE
CG-HPE-TCM	Cluster_176143	HPE	CG	52	TCM	3'-2k	Zm00001d045845	-1	NoDiff
CG-HPE-TCM	Cluster_176388	HPE	CG	71	TCM	3'-2k	Zm00001d045893	-0.965658	NoDiff
CG-HPE-TCM	Cluster_178582	HPE	CG	13	TCM	3'-2k	Zm00001d046333	-3.12475	NoDiff
CG-HPE-TCM	Cluster_179958	HPE	CG	18	TCM	5'-2k	Zm00001d046603	-1.54286	NoDiff
CG-HPE-TCM	Cluster_180218	HPE	CG	63	TCM	3'-2k	Zm00001d046664	-1.07105	NoDiff
CG-HPE-TCM	Cluster_180526	HPE	CG	24	TCM	3'-2k	Zm00001d046725	NA	NoDiff
CG-HPE-TCM	Cluster_180672	HPE	CG	6	TCM	5'-2k	Zm00001d046764	-36.8964	NoDiff
CG-HPE-TCM	Cluster_180955	HPE	CG	84	TCM	3'-2k	Zm00001d046827	0.203806	NoDiff
CG-HPE-TCM	Cluster_181295	HPE	CG	38	TCM	5'-2k	Zm00001d046914	NA	NoDiff
CG-HPE-TCM	Cluster_181573	HPE	CG	17	TCM	3'-2k	Zm00001d046958	2.06583	NoDiff
CG-HPE-TCM	Cluster_181587	HPE	CG	62	TCM	5'-2k	Zm00001d046959	-0.829628	NoDiff
CG-HPE-TCM	Cluster_182464	HPE	CG	37	TCM	5'-2k	Zm00001d047168	-0.45773	AE
CG-HPE-TCM	Cluster_183451	HPE	CG	25	TCM	5'-2k	Zm00001d047458	-59.7745	NoDiff
CG-HPE-TCM	Cluster_186177	HPE	CG	101	TCM	3'-2k	Zm00001d048143	-3.21825	NoDiff
CG-HPE-TCM	Cluster_76577	HPE	CG	5	TCM	3'-2k	Zm00001d048636	NA	NoDiff
CG-HPE-TCM	Cluster_76884	HPE	CG	5	TCM	5'-2k	Zm00001d048709	0.890391	NoDiff
CG-HPE-TCM	Cluster_77183	HPE	CG	102	TCM	3'-2k	Zm00001d048804	-1.29249	NoDiff
CG-HPE-TCM	Cluster_77445	HPE	CG	30	TCM	3'-2k	Zm00001d048903	-4.85086	NoDiff
CG-HPE-TCM	Cluster_80120	HPE	CG	100	TCM	5'-2k	Zm00001d049516	0.507862	DHPE
CG-HPE-TCM	Cluster_80610	HPE	CG	26	TCM	3'-2k	Zm00001d049630	-4.54609	TLPE
CG-HPE-TCM	Cluster_80813	HPE	CG	30	TCM	3'-2k	Zm00001d049704	NA	NoDiff
CG-HPE-TCM	Cluster_80852	HPE	CG	46	TCM	3'-2k	Zm00001d049712	-0.980102	NoDiff
CG-HPE-TCM	Cluster_82710	HPE	CG	8	TCM	3'-2k	Zm00001d050061	0.422511	NoDiff
CG-HPE-TCM	Cluster_83134	HPE	CG	11	TCM	5'-2k	Zm00001d050147	NA	NoDiff
CG-HPE-TCM	Cluster_86224	HPE	CG	6	TCM	5'-2k	Zm00001d050723	2.13889	NoDiff
CG-HPE-TCM	Cluster_90093	HPE	CG	52	TCM	Gene body	Zm00001d051721	NA	NoDiff
CG-HPE-TCM	Cluster_90100	HPE	CG	34	TCM	5'-2k	Zm00001d051725	-0.258757	AE
CG-HPE-TCM	Cluster_90964	HPE	CG	38	TCM	5'-2k	Zm00001d052009	-0.168452	NoDiff
CG-HPE-TCM	Cluster_94746	HPE	CG	10	TCM	Gene body	Zm00001d052998	-0.0476096	AE
CG-HPE-TCM	Cluster_98286	HPE	CG	43	TCM	Gene body	Zm00001d053735	0.552373	DHPE
CG-HPE-TCM	Cluster_98633	HPE	CG	8	TCM	5'-2k	Zm00001d053848	-32.068	NoDiff
CG-LPE-TCdM	Cluster_31368	LPE	CG	9	TCdM	5'-2k	Zm00001d002122	-1.06797	NoDiff
CG-LPE-TCdM	Cluster_35320	LPE	CG	7	TCdM	5'-2k	Zm00001d003282	-0.108725	NoDiff
CG-LPE-TCdM	Cluster_35763	LPE	CG	10	TCdM	5'-2k	Zm00001d003409	0.24355	NoDiff
CG-LPE-TCdM	Cluster_37917	LPE	CG	20	TCdM	3'-2k	Zm00001d003917	-8.33478	NoDiff
CG-LPE-TCdM	Cluster_39158	LPE	CG	34	TCdM	3'-2k	Zm00001d004134	-0.233322	NoDiff
CG-LPE-TCdM	Cluster_45557	LPE	CG	14	TCdM	5'-2k	Zm00001d005424	-1.97771	NoDiff
CG-LPE-TCdM	Cluster_46457	LPE	CG	4	TCdM	5'-2k	Zm00001d005671	0.0316448	NoDiff
CG-LPE-TCdM	Cluster_46608	LPE	CG	26	TCdM	3'-2k	Zm00001d005713	-0.316059	NoDiff
CG-LPE-TCdM	Cluster_49648	LPE	CG	8	TCdM	Gene body	Zm00001d006551	-3.11143	NoDiff
CG-LPE-TCdM	Cluster_49750	LPE	CG	141	TCdM	5'-2k	Zm00001d006582	-20.0744	NoDiff
CG-LPE-TCdM	Cluster_52665	LPE	CG	22	TCdM	5'-2k	Zm00001d007554	-0.436464	NoDiff
CG-LPE-TCdM	Cluster_155938	LPE	CG	19	TCdM	Gene body	Zm00001d008623	0.518528	NoDiff
CG-LPE-TCdM	Cluster_156898	LPE	CG	35	TCdM	5'-2k	Zm00001d008922	0.428895	NoDiff
CG-LPE-TCdM	Cluster_158655	LPE	CG	15	TCdM	5'-2k	Zm00001d009317	-0.0806355	NoDiff
CG-LPE-TCdM	Cluster_162083	LPE	CG	70	TCdM	5'-2k	Zm00001d010106	-0.208516	NoDiff
CG-LPE-TCdM	Cluster_165641	LPE	CG	38	TCdM	5'-2k	Zm00001d010939	-0.911922	NoDiff
CG-LPE-TCdM	Cluster_169459	LPE	CG	10	TCdM	3'-2k	Zm00001d012016	1.79246	NoDiff
CG-LPE-TCdM	Cluster_170353	LPE	CG	14	TCdM	3'-2k	Zm00001d012322	-0.741153	DLPE
CG-LPE-TCdM	Cluster_171336	LPE	CG	18	TCdM	5'-2k	Zm00001d012660	-1.16852	NoDiff
CG-LPE-TCdM	Cluster_171750	LPE	CG	16	TCdM	5'-2k	Zm00001d012791	25.9274	NoDiff
CG-LPE-TCdM	Cluster_99311	LPE	CG	18	TCdM	3'-2k	Zm00001d012816	-0.17131	AE
CG-LPE-TCdM	Cluster_99514	LPE	CG	4	TCdM	3'-2k	Zm00001d012920	-1	NoDiff
CG-LPE-TCdM	Cluster_106085	LPE	CG	55	TCdM	Gene body	Zm00001d014657	2.8599	NoDiff
CG-LPE-TCdM	Cluster_110005	LPE	CG	14	TCdM	5'-2k	Zm00001d015700	1.77871	NoDiff
CG-LPE-TCdM	Cluster_115649	LPE	CG	29	TCdM	5'-2k	Zm00001d016939	NA	NoDiff
CG-LPE-TCdM	Cluster_115849	LPE	CG	16	TCdM	3'-2k	Zm00001d016999	5.1594	NoDiff
CG-LPE-TCdM	Cluster_119016	LPE	CG	116	TCdM	5'-2k	Zm00001d017906	0.773622	NoDiff
CG-LPE-TCdM	Cluster_119066	LPE	CG	33	TCdM	Gene body	Zm00001d017925	-4.8073	NoDiff
CG-LPE-TCdM	Cluster_119440	LPE	CG	4	TCdM	5'-2k	Zm00001d018034	4.19472	NoDiff
CG-LPE-TCdM	Cluster_138708	LPE	CG	6	TCdM	5'-2k	Zm00001d018938	0.214513	NoDiff
CG-LPE-TCdM	Cluster_138829	LPE	CG	9	TCdM	Gene body	Zm00001d018971	NA	NoDiff
CG-LPE-TCdM	Cluster_140761	LPE	CG	8	TCdM	5'-2k	Zm00001d019462	68.1708	NoDiff
CG-LPE-TCdM	Cluster_141267	LPE	CG	58	TCdM	3'-2k	Zm00001d019546	1.76193	NoDiff
CG-LPE-TCdM	Cluster_150532	LPE	CG	10	TCdM	5'-2k	Zm00001d021557	-2.27505	NoDiff
CG-LPE-TCdM	Cluster_151833	LPE	CG	4	TCdM	5'-2k	Zm00001d021910	0.565027	NoDiff
CG-LPE-TCdM	Cluster_153073	LPE	CG	20	TCdM	5'-2k	Zm00001d022330	-6.83316	NoDiff
CG-LPE-TCdM	Cluster_153245	LPE	CG	14	TCdM	Gene body	Zm00001d022395	0.079871	AE
CG-LPE-TCdM	Cluster_188062	LPE	CG	27	TCdM	3'-2k	Zm00001d023399	-1	NoDiff
CG-LPE-TCdM	Cluster_189616	LPE	CG	24	TCdM	5'-2k	Zm00001d023825	12.6204	NoDiff
CG-LPE-TCdM	Cluster_190053	LPE	CG	13	TCdM	3'-2k	Zm00001d023940	NA	NoDiff
CG-LPE-TCdM	Cluster_191145	LPE	CG	18	TCdM	5'-2k	Zm00001d024166	11.0482	THPE
CG-LPE-TCdM	Cluster_200217	LPE	CG	42	TCdM	Gene body	Zm00001d026281	1.31929	NoDiff
CG-LPE-TCdM	Cluster_2113	LPE	CG	14	TCdM	3'-2k	Zm00001d027845	0.0531994	NoDiff
CG-LPE-TCdM	Cluster_3034	LPE	CG	22	TCdM	5'-2k	Zm00001d028071	-1.17806	NoDiff
CG-LPE-TCdM	Cluster_5671	LPE	CG	6	TCdM	3'-2k	Zm00001d028782	-0.999838	NoDiff
CG-LPE-TCdM	Cluster_12313	LPE	CG	36	TCdM	Gene body	Zm00001d030347	-1.39091	NoDiff
CG-LPE-TCdM	Cluster_15775	LPE	CG	27	TCdM	5'-2k	Zm00001d031044	0.386056	NoDiff
CG-LPE-TCdM	Cluster_21714	LPE	CG	18	TCdM	5'-2k	Zm00001d032672	0.363905	AE
CG-LPE-TCdM	Cluster_23236	LPE	CG	20	TCdM	5'-2k	Zm00001d033003	0.681725	NoDiff
CG-LPE-TCdM	Cluster_24196	LPE	CG	7	TCdM	3'-2k	Zm00001d033230	1.37305	NoDiff
CG-LPE-TCdM	Cluster_26319	LPE	CG	45	TCdM	5'-2k	Zm00001d033786	-0.0366393	NoDiff
CG-LPE-TCdM	Cluster_27207	LPE	CG	18	TCdM	3'-2k	Zm00001d034023	-1.26331	NoDiff
CG-LPE-TCdM	Cluster_27216	LPE	CG	18	TCdM	5'-2k	Zm00001d034026	0.675396	NoDiff
CG-LPE-TCdM	Cluster_121252	LPE	CG	7	TCdM	5'-2k	Zm00001d035013	-0.952524	DLPE
CG-LPE-TCdM	Cluster_125337	LPE	CG	16	TCdM	5'-2k	Zm00001d035993	0.831411	NoDiff
CG-LPE-TCdM	Cluster_129810	LPE	CG	20	TCdM	3'-2k	Zm00001d037152	0.447721	NoDiff
CG-LPE-TCdM	Cluster_56715	LPE	CG	22	TCdM	Gene body	Zm00001d040061	0.961512	DHPE
CG-LPE-TCdM	Cluster_64076	LPE	CG	13	TCdM	3'-2k	Zm00001d041678	0.0881669	AE
CG-LPE-TCdM	Cluster_64451	LPE	CG	21	TCdM	Gene body	Zm00001d041777	NA	NoDiff
CG-LPE-TCdM	Cluster_64452	LPE	CG	24	TCdM	Gene body	Zm00001d041777	NA	NoDiff
CG-LPE-TCdM	Cluster_69156	LPE	CG	20	TCdM	3'-2k	Zm00001d042926	4.01374	NoDiff
CG-LPE-TCdM	Cluster_70951	LPE	CG	4	TCdM	5'-2k	Zm00001d043354	0.301413	AE
CG-LPE-TCdM	Cluster_71427	LPE	CG	40	TCdM	Gene body	Zm00001d043479	7.53318	NoDiff
CG-LPE-TCdM	Cluster_71582	LPE	CG	7	TCdM	Gene body	Zm00001d043520	3.06341	NoDiff
CG-LPE-TCdM	Cluster_172070	LPE	CG	9	TCdM	3'-2k	Zm00001d044777	NA	NoDiff
CG-LPE-TCdM	Cluster_172713	LPE	CG	6	TCdM	5'-2k	Zm00001d044927	0.253482	AE
CG-LPE-TCdM	Cluster_173866	LPE	CG	5	TCdM	5'-2k	Zm00001d045258	-1.74752	NoDiff
CG-LPE-TCdM	Cluster_177720	LPE	CG	6	TCdM	3'-2k	Zm00001d046152	NA	NoDiff
CG-LPE-TCdM	Cluster_184665	LPE	CG	10	TCdM	3'-2k	Zm00001d047711	-1	NoDiff
CG-LPE-TCdM	Cluster_185819	LPE	CG	29	TCdM	5'-2k	Zm00001d048013	-1	NoDiff
CG-LPE-TCdM	Cluster_186648	LPE	CG	38	TCdM	Gene body	Zm00001d048297	NA	NoDiff
CG-LPE-TCdM	Cluster_76478	LPE	CG	13	TCdM	3'-2k	Zm00001d048615	9.76395	NoDiff
CG-LPE-TCdM	Cluster_78181	LPE	CG	44	TCdM	5'-2k	Zm00001d049061	-1	NoDiff
CG-LPE-TCdM	Cluster_85420	LPE	CG	9	TCdM	5'-2k	Zm00001d050610	-1.24611	NoDiff
CG-LPE-TCdM	Cluster_87726	LPE	CG	4	TCdM	3'-2k	Zm00001d051119	-3.03992	NoDiff
CG-LPE-TCdM	Cluster_87940	LPE	CG	40	TCdM	Gene body	Zm00001d051161	-2.90286	TLPE
CG-LPE-TCdM	Cluster_87950	LPE	CG	8	TCdM	Gene body	Zm00001d051163	-0.82238	DLPE
CG-LPE-TCdM	Cluster_90811	LPE	CG	136	TCdM	Gene body	Zm00001d051952	-0.896926	DLPE
CG-LPE-TCdM	Cluster_91330	LPE	CG	14	TCdM	5'-2k	Zm00001d052096	0.124799	AE
CG-LPE-TCdM	Cluster_94616	LPE	CG	19	TCdM	3'-2k	Zm00001d052981	-0.0947143	NoDiff
CHG-HPE-TCM	Cluster_31617	HPE	CHG	23	TCM	3'-2k	Zm00001d002213	0.30869	NoDiff
CHG-HPE-TCM	Cluster_31955	HPE	CHG	115	TCM	5'-2k	Zm00001d002361	NA	NoDiff
CHG-HPE-TCM	Cluster_32256	HPE	CHG	6	TCM	5'-2k	Zm00001d002441	41.2474	NoDiff
CHG-HPE-TCM	Cluster_33072	HPE	CHG	58	TCM	Gene body	Zm00001d002694	0.0357188	NoDiff
CHG-HPE-TCM	Cluster_33762	HPE	CHG	26	TCM	5'-2k	Zm00001d002853	-0.472395	NoDiff
CHG-HPE-TCM	Cluster_33923	HPE	CHG	38	TCM	5'-2k	Zm00001d002899	-0.824294	NoDiff
CHG-HPE-TCM	Cluster_34118	HPE	CHG	25	TCM	3'-2k	Zm00001d002959	2.20761	NoDiff
CHG-HPE-TCM	Cluster_34242	HPE	CHG	44	TCM	5'-2k	Zm00001d002992	8.48638	THPE
CHG-HPE-TCM	Cluster_39809	HPE	CHG	57	TCM	Gene body	Zm00001d004243	-9.70517	NoDiff
CHG-HPE-TCM	Cluster_44817	HPE	CHG	11	TCM	Gene body	Zm00001d005248	2.70779	NoDiff
CHG-HPE-TCM	Cluster_45208	HPE	CHG	8	TCM	3'-2k	Zm00001d005328	0.865423	NoDiff
CHG-HPE-TCM	Cluster_46732	HPE	CHG	36	TCM	5'-2k	Zm00001d005732	-1.47174	NoDiff
CHG-HPE-TCM	Cluster_48202	HPE	CHG	26	TCM	5'-2k	Zm00001d006112	0.682507	NoDiff
CHG-HPE-TCM	Cluster_48325	HPE	CHG	24	TCM	5'-2k	Zm00001d006150	0.158043	NoDiff
CHG-HPE-TCM	Cluster_48441	HPE	CHG	30	TCM	3'-2k	Zm00001d006179	5.52697	NoDiff
CHG-HPE-TCM	Cluster_48835	HPE	CHG	11	TCM	Gene body	Zm00001d006307	0.424616	NoDiff
CHG-HPE-TCM	Cluster_50174	HPE	CHG	27	TCM	3'-2k	Zm00001d006705	1.65162	NoDiff
CHG-HPE-TCM	Cluster_50397	HPE	CHG	28	TCM	5'-2k	Zm00001d006787	-0.675453	NoDiff
CHG-HPE-TCM	Cluster_50954	HPE	CHG	6	TCM	5'-2k	Zm00001d007048	-0.415302	NoDiff
CHG-HPE-TCM	Cluster_53572	HPE	CHG	35	TCM	5'-2k	Zm00001d007857	9.44652	NoDiff
CHG-HPE-TCM	Cluster_53880	HPE	CHG	55	TCM	5'-2k	Zm00001d007966	-0.570251	NoDiff
CHG-HPE-TCM	Cluster_155026	HPE	CHG	13	TCM	3'-2k	Zm00001d008371	Inf	NoDiff
CHG-HPE-TCM	Cluster_155766	HPE	CHG	6	TCM	3'-2k	Zm00001d008579	2.1605	NoDiff
CHG-HPE-TCM	Cluster_156378	HPE	CHG	21	TCM	5'-2k	Zm00001d008793	-1.78555	NoDiff
CHG-HPE-TCM	Cluster_158166	HPE	CHG	63	TCM	5'-2k	Zm00001d009230	0.379602	NoDiff
CHG-HPE-TCM	Cluster_159100	HPE	CHG	123	TCM	Gene body	Zm00001d009424	-1.10299	NoDiff
CHG-HPE-TCM	Cluster_160522	HPE	CHG	8	TCM	3'-2k	Zm00001d009792	-2.89113	NoDiff
CHG-HPE-TCM	Cluster_166014	HPE	CHG	9	TCM	5'-2k	Zm00001d011058	-2.86712	NoDiff
CHG-HPE-TCM	Cluster_166969	HPE	CHG	63	TCM	5'-2k	Zm00001d011350	1.07866	NoDiff
CHG-HPE-TCM	Cluster_167153	HPE	CHG	16	TCM	3'-2k	Zm00001d011395	0.376269	NoDiff
CHG-HPE-TCM	Cluster_169308	HPE	CHG	42	TCM	3'-2k	Zm00001d011963	0.25365	NoDiff
CHG-HPE-TCM	Cluster_169539	HPE	CHG	13	TCM	5'-2k	Zm00001d012035	-1	NoDiff
CHG-HPE-TCM	Cluster_171710	HPE	CHG	57	TCM	5'-2k	Zm00001d012779	6.46061	NoDiff
CHG-HPE-TCM	Cluster_99408	HPE	CHG	123	TCM	3'-2k	Zm00001d012867	0.26182	NoDiff
CHG-HPE-TCM	Cluster_99460	HPE	CHG	16	TCM	3'-2k	Zm00001d012892	-2.15645	NoDiff
CHG-HPE-TCM	Cluster_99605	HPE	CHG	37	TCM	5'-2k	Zm00001d012967	22.0004	NoDiff
CHG-HPE-TCM	Cluster_99683	HPE	CHG	100	TCM	5'-2k	Zm00001d013005	0.342172	NoDiff
CHG-HPE-TCM	Cluster_99829	HPE	CHG	27	TCM	3'-2k	Zm00001d013066	-1.26905	NoDiff
CHG-HPE-TCM	Cluster_100178	HPE	CHG	13	TCM	5'-2k	Zm00001d013196	-5.3126	NoDiff
CHG-HPE-TCM	Cluster_100266	HPE	CHG	55	TCM	5'-2k	Zm00001d013232	-0.798291	DLPE
CHG-HPE-TCM	Cluster_100348	HPE	CHG	52	TCM	Gene body	Zm00001d013265	-3.58859	NoDiff
CHG-HPE-TCM	Cluster_100435	HPE	CHG	54	TCM	3'-2k	Zm00001d013295	2.10859	NoDiff
CHG-HPE-TCM	Cluster_102380	HPE	CHG	7	TCM	Gene body	Zm00001d013887	0.111483	AE
CHG-HPE-TCM	Cluster_102674	HPE	CHG	41	TCM	3'-2k	Zm00001d013962	-1.14704	NoDiff
CHG-HPE-TCM	Cluster_103551	HPE	CHG	31	TCM	3'-2k	Zm00001d014157	-1.33097	NoDiff
CHG-HPE-TCM	Cluster_106053	HPE	CHG	111	TCM	Gene body	Zm00001d014652	1.89494	NoDiff
CHG-HPE-TCM	Cluster_106820	HPE	CHG	64	TCM	Gene body	Zm00001d014866	3.12396	NoDiff
CHG-HPE-TCM	Cluster_106903	HPE	CHG	21	TCM	5'-2k	Zm00001d014885	0.610621	DHPE
CHG-HPE-TCM	Cluster_107051	HPE	CHG	7	TCM	Gene body	Zm00001d014928	-1	NoDiff
CHG-HPE-TCM	Cluster_107131	HPE	CHG	19	TCM	5'-2k	Zm00001d014954	-2.47169	NoDiff
CHG-HPE-TCM	Cluster_108137	HPE	CHG	45	TCM	3'-2k	Zm00001d015274	-0.0693148	NoDiff
CHG-HPE-TCM	Cluster_109451	HPE	CHG	37	TCM	5'-2k	Zm00001d015578	0.853621	NoDiff
CHG-HPE-TCM	Cluster_114182	HPE	CHG	16	TCM	3'-2k	Zm00001d016506	1.3787	NoDiff
CHG-HPE-TCM	Cluster_114443	HPE	CHG	67	TCM	5'-2k	Zm00001d016580	NA	NoDiff
CHG-HPE-TCM	Cluster_114618	HPE	CHG	7	TCM	5'-2k	Zm00001d016615	1.42977	NoDiff
CHG-HPE-TCM	Cluster_115484	HPE	CHG	24	TCM	5'-2k	Zm00001d016877	0.0378262	AE
CHG-HPE-TCM	Cluster_116266	HPE	CHG	97	TCM	Gene body	Zm00001d017166	0.0243725	NoDiff
CHG-HPE-TCM	Cluster_116830	HPE	CHG	6	TCM	Gene body	Zm00001d017294	-1.14848	NoDiff
CHG-HPE-TCM	Cluster_117426	HPE	CHG	26	TCM	5'-2k	Zm00001d017459	-0.89344	DLPE
CHG-HPE-TCM	Cluster_118505	HPE	CHG	20	TCM	5'-2k	Zm00001d017754	5.8432	NoDiff
CHG-HPE-TCM	Cluster_119073	HPE	CHG	6	TCM	5'-2k	Zm00001d017926	10.5458	NoDiff
CHG-HPE-TCM	Cluster_119575	HPE	CHG	7	TCM	3'-2k	Zm00001d018073	NA	NoDiff
CHG-HPE-TCM	Cluster_119974	HPE	CHG	11	TCM	5'-2k	Zm00001d018217	-22.8181	NoDiff
CHG-HPE-TCM	Cluster_120870	HPE	CHG	13	TCM	3'-2k	Zm00001d018513	1.0636	NoDiff
CHG-HPE-TCM	Cluster_137619	HPE	CHG	27	TCM	Gene body	Zm00001d018601	NA	NoDiff
CHG-HPE-TCM	Cluster_137897	HPE	CHG	45	TCM	5'-2k	Zm00001d018712	-0.451131	NoDiff
CHG-HPE-TCM	Cluster_139774	HPE	CHG	16	TCM	5'-2k	Zm00001d019214	NA	NoDiff
CHG-HPE-TCM	Cluster_143466	HPE	CHG	37	TCM	5'-2k	Zm00001d019978	0.375162	NoDiff
CHG-HPE-TCM	Cluster_144079	HPE	CHG	10	TCM	5'-2k	Zm00001d020062	-6.79261	NoDiff
CHG-HPE-TCM	Cluster_146621	HPE	CHG	18	TCM	3'-2k	Zm00001d020544	3.43791	NoDiff
CHG-HPE-TCM	Cluster_147499	HPE	CHG	28	TCM	5'-2k	Zm00001d020711	0.451233	NoDiff
CHG-HPE-TCM	Cluster_149468	HPE	CHG	29	TCM	3'-2k	Zm00001d021286	1.52952	NoDiff
CHG-HPE-TCM	Cluster_150072	HPE	CHG	4	TCM	5'-2k	Zm00001d021453	0.215381	NoDiff
CHG-HPE-TCM	Cluster_150070	HPE	CHG	27	TCM	5'-2k	Zm00001d021453	0.215381	NoDiff
CHG-HPE-TCM	Cluster_150208	HPE	CHG	38	TCM	Gene body	Zm00001d021488	2.23391	NoDiff
CHG-HPE-TCM	Cluster_150353	HPE	CHG	77	TCM	3'-2k	Zm00001d021514	NA	NoDiff
CHG-HPE-TCM	Cluster_150665	HPE	CHG	46	TCM	Gene body	Zm00001d021580	-1.53195	NoDiff
CHG-HPE-TCM	Cluster_151276	HPE	CHG	48	TCM	Gene body	Zm00001d021734	-1.86959	NoDiff
CHG-HPE-TCM	Cluster_151565	HPE	CHG	117	TCM	3'-2k	Zm00001d021814	NA	NoDiff
CHG-HPE-TCM	Cluster_153805	HPE	CHG	16	TCM	3'-2k	Zm00001d022530	-1.06515	DLPE
CHG-HPE-TCM	Cluster_153889	HPE	CHG	22	TCM	3'-2k	Zm00001d022558	-0.701058	NoDiff
CHG-HPE-TCM	Cluster_191979	HPE	CHG	47	TCM	3'-2k	Zm00001d024314	-0.25727	AE
CHG-HPE-TCM	Cluster_192046	HPE	CHG	16	TCM	3'-2k	Zm00001d024320	NA	NoDiff
CHG-HPE-TCM	Cluster_193378	HPE	CHG	16	TCM	Gene body	Zm00001d024595	3.73062	NoDiff
CHG-HPE-TCM	Cluster_193410	HPE	CHG	25	TCM	5'-2k	Zm00001d024602	-9.62426	NoDiff
CHG-HPE-TCM	Cluster_194687	HPE	CHG	4	TCM	3'-2k	Zm00001d024904	42.4252	THPE
CHG-HPE-TCM	Cluster_196852	HPE	CHG	54	TCM	5'-2k	Zm00001d025327	-4.77215	NoDiff
CHG-HPE-TCM	Cluster_198748	HPE	CHG	31	TCM	Gene body	Zm00001d025836	0.43136	NoDiff
CHG-HPE-TCM	Cluster_198840	HPE	CHG	22	TCM	3'-2k	Zm00001d025872	-4.07665	NoDiff
CHG-HPE-TCM	Cluster_199270	HPE	CHG	73	TCM	3'-2k	Zm00001d026012	0.392292	NoDiff
CHG-HPE-TCM	Cluster_200431	HPE	CHG	29	TCM	3'-2k	Zm00001d026359	-1.50513	NoDiff
CHG-HPE-TCM	Cluster_200531	HPE	CHG	117	TCM	Gene body	Zm00001d026387	-0.205226	AE
CHG-HPE-TCM	Cluster_200891	HPE	CHG	9	TCM	5'-2k	Zm00001d026514	-0.897196	NoDiff
CHG-HPE-TCM	Cluster_201147	HPE	CHG	16	TCM	3'-2k	Zm00001d026625	0.0672877	NoDiff
CHG-HPE-TCM	Cluster_201183	HPE	CHG	8	TCM	Gene body	Zm00001d026647	-3.32881	NoDiff
CHG-HPE-TCM	Cluster_691	HPE	CHG	57	TCM	5'-2k	Zm00001d027444	-0.406339	NoDiff
CHG-HPE-TCM	Cluster_797	HPE	CHG	95	TCM	Gene body	Zm00001d027472	0.484668	AE
CHG-HPE-TCM	Cluster_1121	HPE	CHG	21	TCM	5'-2k	Zm00001d027558	-0.805372	NoDiff
CHG-HPE-TCM	Cluster_1441	HPE	CHG	8	TCM	3'-2k	Zm00001d027658	NA	NoDiff
CHG-HPE-TCM	Cluster_1625	HPE	CHG	13	TCM	5'-2k	Zm00001d027711	0.504786	DHPE
CHG-HPE-TCM	Cluster_3166	HPE	CHG	51	TCM	3'-2k	Zm00001d028114	19.2093	NoDiff
CHG-HPE-TCM	Cluster_3376	HPE	CHG	31	TCM	3'-2k	Zm00001d028167	-0.333813	NoDiff
CHG-HPE-TCM	Cluster_3840	HPE	CHG	18	TCM	5'-2k	Zm00001d028295	1.90475	DHPE
CHG-HPE-TCM	Cluster_4163	HPE	CHG	46	TCM	5'-2k	Zm00001d028362	2.58677	NoDiff
CHG-HPE-TCM	Cluster_4517	HPE	CHG	15	TCM	3'-2k	Zm00001d028447	-0.0222025	NoDiff
CHG-HPE-TCM	Cluster_4963	HPE	CHG	9	TCM	Gene body	Zm00001d028576	-3.31574	NoDiff
CHG-HPE-TCM	Cluster_6032	HPE	CHG	4	TCM	5'-2k	Zm00001d028880	1.2207	NoDiff
CHG-HPE-TCM	Cluster_6730	HPE	CHG	51	TCM	5'-2k	Zm00001d029059	3.43159	NoDiff
CHG-HPE-TCM	Cluster_7333	HPE	CHG	36	TCM	3'-2k	Zm00001d029209	-5.02823	NoDiff
CHG-HPE-TCM	Cluster_7782	HPE	CHG	4	TCM	Gene body	Zm00001d029342	0.1655	NoDiff
CHG-HPE-TCM	Cluster_7821	HPE	CHG	24	TCM	3'-2k	Zm00001d029352	-1.82509	NoDiff
CHG-HPE-TCM	Cluster_7949	HPE	CHG	46	TCM	3'-2k	Zm00001d029378	-0.029372	NoDiff
CHG-HPE-TCM	Cluster_8461	HPE	CHG	20	TCM	Gene body	Zm00001d029502	16.3883	THPE
CHG-HPE-TCM	Cluster_9834	HPE	CHG	48	TCM	3'-2k	Zm00001d029827	-0.821155	NoDiff
CHG-HPE-TCM	Cluster_10376	HPE	CHG	33	TCM	3'-2k	Zm00001d029938	-4.30951	NoDiff
CHG-HPE-TCM	Cluster_10447	HPE	CHG	32	TCM	3'-2k	Zm00001d029964	-0.25022	NoDiff
CHG-HPE-TCM	Cluster_11517	HPE	CHG	17	TCM	5'-2k	Zm00001d030194	1.20603	NoDiff
CHG-HPE-TCM	Cluster_11853	HPE	CHG	21	TCM	Gene body	Zm00001d030266	-2.45537	NoDiff
CHG-HPE-TCM	Cluster_12561	HPE	CHG	30	TCM	3'-2k	Zm00001d030393	0.738892	NoDiff
CHG-HPE-TCM	Cluster_15943	HPE	CHG	30	TCM	3'-2k	Zm00001d031090	0.282134	NoDiff
CHG-HPE-TCM	Cluster_16425	HPE	CHG	35	TCM	5'-2k	Zm00001d031223	1.95191	NoDiff
CHG-HPE-TCM	Cluster_16681	HPE	CHG	103	TCM	5'-2k	Zm00001d031310	0.279764	NoDiff
CHG-HPE-TCM	Cluster_17370	HPE	CHG	52	TCM	Gene body	Zm00001d031573	-0.970206	NoDiff
CHG-HPE-TCM	Cluster_17561	HPE	CHG	47	TCM	3'-2k	Zm00001d031631	NA	NoDiff
CHG-HPE-TCM	Cluster_17563	HPE	CHG	47	TCM	3'-2k	Zm00001d031632	-0.632429	NoDiff
CHG-HPE-TCM	Cluster_18282	HPE	CHG	44	TCM	5'-2k	Zm00001d031861	-1	NoDiff
CHG-HPE-TCM	Cluster_18323	HPE	CHG	22	TCM	5'-2k	Zm00001d031871	1.6941	NoDiff
CHG-HPE-TCM	Cluster_18782	HPE	CHG	67	TCM	Gene body	Zm00001d032004	-12.4064	NoDiff
CHG-HPE-TCM	Cluster_19378	HPE	CHG	36	TCM	3'-2k	Zm00001d032123	-1.39307	NoDiff
CHG-HPE-TCM	Cluster_20517	HPE	CHG	30	TCM	3'-2k	Zm00001d032345	NA	NoDiff
CHG-HPE-TCM	Cluster_21231	HPE	CHG	11	TCM	5'-2k	Zm00001d032543	0.0983502	AE
CHG-HPE-TCM	Cluster_21527	HPE	CHG	81	TCM	5'-2k	Zm00001d032632	4.4006	NoDiff
CHG-HPE-TCM	Cluster_23846	HPE	CHG	7	TCM	5'-2k	Zm00001d033153	0.0886323	AE
CHG-HPE-TCM	Cluster_24705	HPE	CHG	8	TCM	3'-2k	Zm00001d033342	NA	NoDiff
CHG-HPE-TCM	Cluster_26414	HPE	CHG	26	TCM	Gene body	Zm00001d033817	3.87445	NoDiff
CHG-HPE-TCM	Cluster_26580	HPE	CHG	80	TCM	3'-2k	Zm00001d033859	6.64582	NoDiff
CHG-HPE-TCM	Cluster_28403	HPE	CHG	36	TCM	3'-2k	Zm00001d034356	-1.94147	DLPE
CHG-HPE-TCM	Cluster_29125	HPE	CHG	62	TCM	Gene body	Zm00001d034582	0.994274	NoDiff
CHG-HPE-TCM	Cluster_29597	HPE	CHG	26	TCM	5'-2k	Zm00001d034733	-0.595002	NoDiff
CHG-HPE-TCM	Cluster_29985	HPE	CHG	18	TCM	3'-2k	Zm00001d034859	-1.98383	NoDiff
CHG-HPE-TCM	Cluster_122203	HPE	CHG	10	TCM	3'-2k	Zm00001d035269	0.350793	NoDiff
CHG-HPE-TCM	Cluster_123611	HPE	CHG	21	TCM	3'-2k	Zm00001d035579	0.586682	DHPE
CHG-HPE-TCM	Cluster_125206	HPE	CHG	6	TCM	5'-2k	Zm00001d035965	2.05292	NoDiff
CHG-HPE-TCM	Cluster_126262	HPE	CHG	83	TCM	5'-2k	Zm00001d036216	-5.40338	NoDiff
CHG-HPE-TCM	Cluster_126466	HPE	CHG	5	TCM	5'-2k	Zm00001d036275	-2.50051	NoDiff
CHG-HPE-TCM	Cluster_127152	HPE	CHG	41	TCM	5'-2k	Zm00001d036463	0.299343	AE
CHG-HPE-TCM	Cluster_127494	HPE	CHG	22	TCM	3'-2k	Zm00001d036570	-7.79238	NoDiff
CHG-HPE-TCM	Cluster_127518	HPE	CHG	38	TCM	5'-2k	Zm00001d036575	-1	NoDiff
CHG-HPE-TCM	Cluster_127623	HPE	CHG	23	TCM	5'-2k	Zm00001d036602	-0.870257	DLPE
CHG-HPE-TCM	Cluster_128741	HPE	CHG	11	TCM	3'-2k	Zm00001d036878	1.23712	NoDiff
CHG-HPE-TCM	Cluster_129502	HPE	CHG	22	TCM	5'-2k	Zm00001d037080	-0.863288	DLPE
CHG-HPE-TCM	Cluster_130513	HPE	CHG	20	TCM	3'-2k	Zm00001d037318	0.446585	NoDiff
CHG-HPE-TCM	Cluster_130595	HPE	CHG	33	TCM	5'-2k	Zm00001d037329	1.58144	NoDiff
CHG-HPE-TCM	Cluster_133303	HPE	CHG	35	TCM	5'-2k	Zm00001d037947	1.35546	NoDiff
CHG-HPE-TCM	Cluster_135042	HPE	CHG	31	TCM	5'-2k	Zm00001d038378	-0.428633	NoDiff
CHG-HPE-TCM	Cluster_135497	HPE	CHG	37	TCM	Gene body	Zm00001d038511	-0.168685	NoDiff
CHG-HPE-TCM	Cluster_135654	HPE	CHG	113	TCM	Gene body	Zm00001d038574	0.549251	DHPE
CHG-HPE-TCM	Cluster_135950	HPE	CHG	39	TCM	5'-2k	Zm00001d038682	-0.34685	NoDiff
CHG-HPE-TCM	Cluster_136495	HPE	CHG	11	TCM	5'-2k	Zm00001d038861	-0.644674	NoDiff
CHG-HPE-TCM	Cluster_136790	HPE	CHG	26	TCM	Gene body	Zm00001d038972	19.7955	THPE
CHG-HPE-TCM	Cluster_136913	HPE	CHG	11	TCM	5'-2k	Zm00001d039022	-0.277328	AE
CHG-HPE-TCM	Cluster_53992	HPE	CHG	14	TCM	5'-2k	Zm00001d039270	4.84052	NoDiff
CHG-HPE-TCM	Cluster_54264	HPE	CHG	11	TCM	Gene body	Zm00001d039382	NA	NoDiff
CHG-HPE-TCM	Cluster_56613	HPE	CHG	67	TCM	Gene body	Zm00001d040046	-0.548749	NoDiff
CHG-HPE-TCM	Cluster_57871	HPE	CHG	24	TCM	5'-2k	Zm00001d040321	-1	NoDiff
CHG-HPE-TCM	Cluster_59442	HPE	CHG	16	TCM	3'-2k	Zm00001d040681	-17.0152	NoDiff
CHG-HPE-TCM	Cluster_59900	HPE	CHG	12	TCM	Gene body	Zm00001d040759	0.442201	AE
CHG-HPE-TCM	Cluster_60120	HPE	CHG	69	TCM	Gene body	Zm00001d040807	1.76825	NoDiff
CHG-HPE-TCM	Cluster_60281	HPE	CHG	43	TCM	5'-2k	Zm00001d040842	2.13172	THPE
CHG-HPE-TCM	Cluster_62166	HPE	CHG	27	TCM	5'-2k	Zm00001d041215	7.18896	NoDiff
CHG-HPE-TCM	Cluster_62575	HPE	CHG	32	TCM	5'-2k	Zm00001d041331	-0.103127	AE
CHG-HPE-TCM	Cluster_63885	HPE	CHG	26	TCM	5'-2k	Zm00001d041640	-0.242874	NoDiff
CHG-HPE-TCM	Cluster_67353	HPE	CHG	40	TCM	5'-2k	Zm00001d042498	2.50257	NoDiff
CHG-HPE-TCM	Cluster_68944	HPE	CHG	43	TCM	Gene body	Zm00001d042880	0.579511	NoDiff
CHG-HPE-TCM	Cluster_69673	HPE	CHG	9	TCM	5'-2k	Zm00001d043059	-2.47008	NoDiff
CHG-HPE-TCM	Cluster_70916	HPE	CHG	37	TCM	5'-2k	Zm00001d043340	-2.34793	NoDiff
CHG-HPE-TCM	Cluster_71121	HPE	CHG	23	TCM	5'-2k	Zm00001d043395	-1.34288	NoDiff
CHG-HPE-TCM	Cluster_72198	HPE	CHG	35	TCM	5'-2k	Zm00001d043672	0.344328	NoDiff
CHG-HPE-TCM	Cluster_72428	HPE	CHG	5	TCM	5'-2k	Zm00001d043741	-0.751705	NoDiff
CHG-HPE-TCM	Cluster_72548	HPE	CHG	24	TCM	5'-2k	Zm00001d043776	0.408651	NoDiff
CHG-HPE-TCM	Cluster_72664	HPE	CHG	11	TCM	3'-2k	Zm00001d043806	-1.1155	NoDiff
CHG-HPE-TCM	Cluster_73689	HPE	CHG	19	TCM	3'-2k	Zm00001d044044	NA	NoDiff
CHG-HPE-TCM	Cluster_73896	HPE	CHG	24	TCM	Gene body	Zm00001d044091	1.08336	NoDiff
CHG-HPE-TCM	Cluster_75425	HPE	CHG	5	TCM	3'-2k	Zm00001d044471	NA	NoDiff
CHG-HPE-TCM	Cluster_172349	HPE	CHG	65	TCM	3'-2k	Zm00001d044841	-1.21145	NoDiff
CHG-HPE-TCM	Cluster_174068	HPE	CHG	17	TCM	5'-2k	Zm00001d045351	-1.99986	NoDiff
CHG-HPE-TCM	Cluster_176098	HPE	CHG	23	TCM	Gene body	Zm00001d045836	-5.30375	NoDiff
CHG-HPE-TCM	Cluster_176132	HPE	CHG	33	TCM	3'-2k	Zm00001d045842	-1	NoDiff
CHG-HPE-TCM	Cluster_176444	HPE	CHG	8	TCM	3'-2k	Zm00001d045904	NA	NoDiff
CHG-HPE-TCM	Cluster_178582	HPE	CHG	12	TCM	3'-2k	Zm00001d046333	-3.12475	NoDiff
CHG-HPE-TCM	Cluster_178853	HPE	CHG	13	TCM	Gene body	Zm00001d046374	13.5387	NoDiff
CHG-HPE-TCM	Cluster_179083	HPE	CHG	61	TCM	Gene body	Zm00001d046416	9.07591	NoDiff
CHG-HPE-TCM	Cluster_180218	HPE	CHG	44	TCM	3'-2k	Zm00001d046664	-1.07105	NoDiff
CHG-HPE-TCM	Cluster_180433	HPE	CHG	104	TCM	Gene body	Zm00001d046697	-1.89586	NoDiff
CHG-HPE-TCM	Cluster_180526	HPE	CHG	20	TCM	3'-2k	Zm00001d046725	NA	NoDiff
CHG-HPE-TCM	Cluster_180955	HPE	CHG	88	TCM	3'-2k	Zm00001d046827	0.203806	NoDiff
CHG-HPE-TCM	Cluster_181785	HPE	CHG	13	TCM	3'-2k	Zm00001d047000	-1.10063	NoDiff
CHG-HPE-TCM	Cluster_182464	HPE	CHG	34	TCM	5'-2k	Zm00001d047168	-0.45773	AE
CHG-HPE-TCM	Cluster_182892	HPE	CHG	20	TCM	3'-2k	Zm00001d047282	0.364222	NoDiff
CHG-HPE-TCM	Cluster_183716	HPE	CHG	36	TCM	Gene body	Zm00001d047518	-0.111384	NoDiff
CHG-HPE-TCM	Cluster_185525	HPE	CHG	18	TCM	3'-2k	Zm00001d047941	-2.08564	NoDiff
CHG-HPE-TCM	Cluster_185921	HPE	CHG	13	TCM	5'-2k	Zm00001d048054	1.93031	DHPE
CHG-HPE-TCM	Cluster_186177	HPE	CHG	104	TCM	3'-2k	Zm00001d048143	-3.21825	NoDiff
CHG-HPE-TCM	Cluster_186312	HPE	CHG	9	TCM	5'-2k	Zm00001d048183	NA	NoDiff
CHG-HPE-TCM	Cluster_186671	HPE	CHG	38	TCM	5'-2k	Zm00001d048308	0.207567	NoDiff
CHG-HPE-TCM	Cluster_76577	HPE	CHG	11	TCM	3'-2k	Zm00001d048636	NA	NoDiff
CHG-HPE-TCM	Cluster_76884	HPE	CHG	22	TCM	5'-2k	Zm00001d048709	0.890391	NoDiff
CHG-HPE-TCM	Cluster_77779	HPE	CHG	4	TCM	3'-2k	Zm00001d048968	11.4227	NoDiff
CHG-HPE-TCM	Cluster_78394	HPE	CHG	38	TCM	5'-2k	Zm00001d049105	NA	NoDiff
CHG-HPE-TCM	Cluster_80272	HPE	CHG	5	TCM	3'-2k	Zm00001d049544	1.57669	DHPE
CHG-HPE-TCM	Cluster_81850	HPE	CHG	70	TCM	3'-2k	Zm00001d049910	-0.696668	DLPE
CHG-HPE-TCM	Cluster_82710	HPE	CHG	18	TCM	3'-2k	Zm00001d050061	0.422511	NoDiff
CHG-HPE-TCM	Cluster_82711	HPE	CHG	11	TCM	3'-2k	Zm00001d050061	0.422511	NoDiff
CHG-HPE-TCM	Cluster_84024	HPE	CHG	70	TCM	Gene body	Zm00001d050333	4.24584	NoDiff
CHG-HPE-TCM	Cluster_84421	HPE	CHG	116	TCM	3'-2k	Zm00001d050425	-1	NoDiff
CHG-HPE-TCM	Cluster_86224	HPE	CHG	17	TCM	5'-2k	Zm00001d050723	2.13889	NoDiff
CHG-HPE-TCM	Cluster_87035	HPE	CHG	45	TCM	Gene body	Zm00001d050929	5.88212	NoDiff
CHG-HPE-TCM	Cluster_88558	HPE	CHG	27	TCM	5'-2k	Zm00001d051320	0.369576	NoDiff
CHG-HPE-TCM	Cluster_88775	HPE	CHG	64	TCM	5'-2k	Zm00001d051360	0.172428	AE
CHG-HPE-TCM	Cluster_90093	HPE	CHG	49	TCM	Gene body	Zm00001d051721	NA	NoDiff
CHG-HPE-TCM	Cluster_90096	HPE	CHG	17	TCM	5'-2k	Zm00001d051723	-0.098563	AE
CHG-HPE-TCM	Cluster_90100	HPE	CHG	19	TCM	5'-2k	Zm00001d051725	-0.258757	AE
CHG-HPE-TCM	Cluster_90200	HPE	CHG	10	TCM	5'-2k	Zm00001d051759	1.58435	NoDiff
CHG-HPE-TCM	Cluster_90964	HPE	CHG	23	TCM	5'-2k	Zm00001d052009	-0.168452	NoDiff
CHG-HPE-TCM	Cluster_90969	HPE	CHG	19	TCM	5'-2k	Zm00001d052010	0.015375	NoDiff
CHG-HPE-TCM	Cluster_92744	HPE	CHG	16	TCM	Gene body	Zm00001d052485	-0.950873	NoDiff
CHG-HPE-TCM	Cluster_95631	HPE	CHG	19	TCM	5'-2k	Zm00001d053133	-1.10829	DLPE
CHG-HPE-TCM	Cluster_95963	HPE	CHG	19	TCM	5'-2k	Zm00001d053189	-2.57081	NoDiff
CHG-HPE-TCM	Cluster_96739	HPE	CHG	19	TCM	3'-2k	Zm00001d053324	NA	NoDiff
CHG-HPE-TCM	Cluster_99006	HPE	CHG	38	TCM	Gene body	Zm00001d054031	0.0538949	AE
CHG-HPE-TCM	Cluster_99009	HPE	CHG	10	TCM	5'-2k	Zm00001d054032	-0.475998	NoDiff
CHG-LPE-TCdM	Cluster_31016	LPE	CHG	52	TCdM	5'-2k	Zm00001d001984	3.60605	NoDiff
CHG-LPE-TCdM	Cluster_31368	LPE	CHG	9	TCdM	5'-2k	Zm00001d002122	-1.06797	NoDiff
CHG-LPE-TCdM	Cluster_31537	LPE	CHG	31	TCdM	5'-2k	Zm00001d002179	1.25973	NoDiff
CHG-LPE-TCdM	Cluster_31618	LPE	CHG	26	TCdM	3'-2k	Zm00001d002213	0.30869	NoDiff
CHG-LPE-TCdM	Cluster_32193	LPE	CHG	9	TCdM	5'-2k	Zm00001d002422	0.750666	NoDiff
CHG-LPE-TCdM	Cluster_33053	LPE	CHG	20	TCdM	Gene body	Zm00001d002687	2.02171	NoDiff
CHG-LPE-TCdM	Cluster_33737	LPE	CHG	15	TCdM	Gene body	Zm00001d002847	-1.02397	DLPE
CHG-LPE-TCdM	Cluster_34570	LPE	CHG	22	TCdM	3'-2k	Zm00001d003085	1.64598	NoDiff
CHG-LPE-TCdM	Cluster_35763	LPE	CHG	7	TCdM	5'-2k	Zm00001d003409	0.24355	NoDiff
CHG-LPE-TCdM	Cluster_35918	LPE	CHG	49	TCdM	Gene body	Zm00001d003464	-1.10202	NoDiff
CHG-LPE-TCdM	Cluster_37917	LPE	CHG	17	TCdM	3'-2k	Zm00001d003917	-8.33478	NoDiff
CHG-LPE-TCdM	Cluster_42590	LPE	CHG	28	TCdM	5'-2k	Zm00001d004785	0.53362	NoDiff
CHG-LPE-TCdM	Cluster_45318	LPE	CHG	47	TCdM	Gene body	Zm00001d005358	3.19123	NoDiff
CHG-LPE-TCdM	Cluster_45480	LPE	CHG	6	TCdM	Gene body	Zm00001d005403	0.168357	NoDiff
CHG-LPE-TCdM	Cluster_45557	LPE	CHG	19	TCdM	5'-2k	Zm00001d005424	-1.97771	NoDiff
CHG-LPE-TCdM	Cluster_45670	LPE	CHG	43	TCdM	Gene body	Zm00001d005453	-0.413981	NoDiff
CHG-LPE-TCdM	Cluster_46608	LPE	CHG	30	TCdM	3'-2k	Zm00001d005713	-0.316059	NoDiff
CHG-LPE-TCdM	Cluster_48613	LPE	CHG	19	TCdM	3'-2k	Zm00001d006226	-0.905027	NoDiff
CHG-LPE-TCdM	Cluster_49648	LPE	CHG	8	TCdM	Gene body	Zm00001d006551	-3.11143	NoDiff
CHG-LPE-TCdM	Cluster_51045	LPE	CHG	117	TCdM	Gene body	Zm00001d007075	0.807837	NoDiff
CHG-LPE-TCdM	Cluster_51308	LPE	CHG	7	TCdM	3'-2k	Zm00001d007187	0.590275	NoDiff
CHG-LPE-TCdM	Cluster_52212	LPE	CHG	29	TCdM	3'-2k	Zm00001d007407	5.52348	NoDiff
CHG-LPE-TCdM	Cluster_52978	LPE	CHG	27	TCdM	Gene body	Zm00001d007642	-1	NoDiff
CHG-LPE-TCdM	Cluster_155001	LPE	CHG	43	TCdM	3'-2k	Zm00001d008367	0.645347	DHPE
CHG-LPE-TCdM	Cluster_156730	LPE	CHG	10	TCdM	5'-2k	Zm00001d008872	NA	NoDiff
CHG-LPE-TCdM	Cluster_158208	LPE	CHG	13	TCdM	5'-2k	Zm00001d009237	NA	NoDiff
CHG-LPE-TCdM	Cluster_159129	LPE	CHG	9	TCdM	5'-2k	Zm00001d009430	38.2648	NoDiff
CHG-LPE-TCdM	Cluster_160458	LPE	CHG	37	TCdM	5'-2k	Zm00001d009778	-1.44539	NoDiff
CHG-LPE-TCdM	Cluster_162018	LPE	CHG	65	TCdM	5'-2k	Zm00001d010085	-0.478282	NoDiff
CHG-LPE-TCdM	Cluster_162083	LPE	CHG	60	TCdM	5'-2k	Zm00001d010106	-0.208516	NoDiff
CHG-LPE-TCdM	Cluster_162346	LPE	CHG	9	TCdM	3'-2k	Zm00001d010162	-0.0646014	AE
CHG-LPE-TCdM	Cluster_162486	LPE	CHG	45	TCdM	5'-2k	Zm00001d010201	-1.2575	NoDiff
CHG-LPE-TCdM	Cluster_164151	LPE	CHG	21	TCdM	Gene body	Zm00001d010546	0.949784	NoDiff
CHG-LPE-TCdM	Cluster_167067	LPE	CHG	57	TCdM	3'-2k	Zm00001d011362	0.0193722	NoDiff
CHG-LPE-TCdM	Cluster_167598	LPE	CHG	35	TCdM	5'-2k	Zm00001d011512	-1.69791	NoDiff
CHG-LPE-TCdM	Cluster_169749	LPE	CHG	29	TCdM	Gene body	Zm00001d012118	-1.88925	NoDiff
CHG-LPE-TCdM	Cluster_170353	LPE	CHG	8	TCdM	3'-2k	Zm00001d012322	-0.741153	DLPE
CHG-LPE-TCdM	Cluster_171017	LPE	CHG	68	TCdM	5'-2k	Zm00001d012546	-0.30538	NoDiff
CHG-LPE-TCdM	Cluster_171750	LPE	CHG	24	TCdM	5'-2k	Zm00001d012791	25.9274	NoDiff
CHG-LPE-TCdM	Cluster_99311	LPE	CHG	27	TCdM	3'-2k	Zm00001d012816	-0.17131	AE
CHG-LPE-TCdM	Cluster_99725	LPE	CHG	13	TCdM	3'-2k	Zm00001d013021	-4.56393	NoDiff
CHG-LPE-TCdM	Cluster_100056	LPE	CHG	5	TCdM	3'-2k	Zm00001d013141	-0.358425	NoDiff
CHG-LPE-TCdM	Cluster_101278	LPE	CHG	26	TCdM	5'-2k	Zm00001d013575	NA	NoDiff
CHG-LPE-TCdM	Cluster_101710	LPE	CHG	7	TCdM	Gene body	Zm00001d013713	-0.186788	AE
CHG-LPE-TCdM	Cluster_103748	LPE	CHG	26	TCdM	3'-2k	Zm00001d014193	NA	NoDiff
CHG-LPE-TCdM	Cluster_106085	LPE	CHG	21	TCdM	Gene body	Zm00001d014657	2.8599	NoDiff
CHG-LPE-TCdM	Cluster_109535	LPE	CHG	24	TCdM	3'-2k	Zm00001d015594	-1	NoDiff
CHG-LPE-TCdM	Cluster_111222	LPE	CHG	30	TCdM	Gene body	Zm00001d015890	-1.33248	NoDiff
CHG-LPE-TCdM	Cluster_113276	LPE	CHG	11	TCdM	Gene body	Zm00001d016280	29.1147	NoDiff
CHG-LPE-TCdM	Cluster_115238	LPE	CHG	19	TCdM	Gene body	Zm00001d016811	-0.752417	DLPE
CHG-LPE-TCdM	Cluster_115649	LPE	CHG	12	TCdM	5'-2k	Zm00001d016939	NA	NoDiff
CHG-LPE-TCdM	Cluster_116197	LPE	CHG	10	TCdM	Gene body	Zm00001d017144	-0.605467	NoDiff
CHG-LPE-TCdM	Cluster_117481	LPE	CHG	17	TCdM	5'-2k	Zm00001d017476	-2.91041	NoDiff
CHG-LPE-TCdM	Cluster_117691	LPE	CHG	8	TCdM	3'-2k	Zm00001d017530	0.0193785	AE
CHG-LPE-TCdM	Cluster_118251	LPE	CHG	13	TCdM	5'-2k	Zm00001d017676	-0.70711	NoDiff
CHG-LPE-TCdM	Cluster_118501	LPE	CHG	22	TCdM	Gene body	Zm00001d017754	5.8432	NoDiff
CHG-LPE-TCdM	Cluster_119208	LPE	CHG	31	TCdM	3'-2k	Zm00001d017961	-1.10199	NoDiff
CHG-LPE-TCdM	Cluster_138829	LPE	CHG	4	TCdM	Gene body	Zm00001d018971	NA	NoDiff
CHG-LPE-TCdM	Cluster_140732	LPE	CHG	7	TCdM	Gene body	Zm00001d019454	0.365278	AE
CHG-LPE-TCdM	Cluster_140761	LPE	CHG	7	TCdM	5'-2k	Zm00001d019462	68.1708	NoDiff
CHG-LPE-TCdM	Cluster_140872	LPE	CHG	27	TCdM	3'-2k	Zm00001d019492	-1.00459	NoDiff
CHG-LPE-TCdM	Cluster_144515	LPE	CHG	59	TCdM	Gene body	Zm00001d020158	-3.52306	NoDiff
CHG-LPE-TCdM	Cluster_145054	LPE	CHG	30	TCdM	3'-2k	Zm00001d020282	-0.359719	NoDiff
CHG-LPE-TCdM	Cluster_146138	LPE	CHG	24	TCdM	Gene body	Zm00001d020468	NA	NoDiff
CHG-LPE-TCdM	Cluster_146281	LPE	CHG	20	TCdM	Gene body	Zm00001d020483	Inf	NoDiff
CHG-LPE-TCdM	Cluster_147865	LPE	CHG	18	TCdM	3'-2k	Zm00001d020805	NA	NoDiff
CHG-LPE-TCdM	Cluster_148572	LPE	CHG	73	TCdM	Gene body	Zm00001d020985	1.05758	NoDiff
CHG-LPE-TCdM	Cluster_150396	LPE	CHG	16	TCdM	5'-2k	Zm00001d021524	-0.71917	NoDiff
CHG-LPE-TCdM	Cluster_151715	LPE	CHG	13	TCdM	3'-2k	Zm00001d021862	6.31976	NoDiff
CHG-LPE-TCdM	Cluster_151833	LPE	CHG	7	TCdM	5'-2k	Zm00001d021910	0.565027	NoDiff
CHG-LPE-TCdM	Cluster_153073	LPE	CHG	23	TCdM	5'-2k	Zm00001d022330	-6.83316	NoDiff
CHG-LPE-TCdM	Cluster_153245	LPE	CHG	55	TCdM	Gene body	Zm00001d022395	0.079871	AE
CHG-LPE-TCdM	Cluster_153636	LPE	CHG	11	TCdM	5'-2k	Zm00001d022488	-0.532194	NoDiff
CHG-LPE-TCdM	Cluster_188062	LPE	CHG	18	TCdM	3'-2k	Zm00001d023399	-1	NoDiff
CHG-LPE-TCdM	Cluster_188097	LPE	CHG	16	TCdM	3'-2k	Zm00001d023409	5.05172	NoDiff
CHG-LPE-TCdM	Cluster_188110	LPE	CHG	52	TCdM	3'-2k	Zm00001d023417	-1	NoDiff
CHG-LPE-TCdM	Cluster_188974	LPE	CHG	13	TCdM	3'-2k	Zm00001d023661	-1	NoDiff
CHG-LPE-TCdM	Cluster_189616	LPE	CHG	18	TCdM	5'-2k	Zm00001d023825	12.6204	NoDiff
CHG-LPE-TCdM	Cluster_191145	LPE	CHG	37	TCdM	5'-2k	Zm00001d024166	11.0482	THPE
CHG-LPE-TCdM	Cluster_194017	LPE	CHG	16	TCdM	5'-2k	Zm00001d024762	0.311277	AE
CHG-LPE-TCdM	Cluster_195439	LPE	CHG	31	TCdM	5'-2k	Zm00001d025050	-6.45455	NoDiff
CHG-LPE-TCdM	Cluster_200217	LPE	CHG	30	TCdM	Gene body	Zm00001d026281	1.31929	NoDiff
CHG-LPE-TCdM	Cluster_200520	LPE	CHG	15	TCdM	3'-2k	Zm00001d026379	1.19243	NoDiff
CHG-LPE-TCdM	Cluster_200524	LPE	CHG	28	TCdM	3'-2k	Zm00001d026383	1.99761	NoDiff
CHG-LPE-TCdM	Cluster_1016	LPE	CHG	15	TCdM	Gene body	Zm00001d027535	-0.466505	AE
CHG-LPE-TCdM	Cluster_2113	LPE	CHG	24	TCdM	3'-2k	Zm00001d027845	0.0531994	NoDiff
CHG-LPE-TCdM	Cluster_2873	LPE	CHG	11	TCdM	5'-2k	Zm00001d028013	0.0145016	NoDiff
CHG-LPE-TCdM	Cluster_3034	LPE	CHG	12	TCdM	5'-2k	Zm00001d028071	-1.17806	NoDiff
CHG-LPE-TCdM	Cluster_4704	LPE	CHG	12	TCdM	3'-2k	Zm00001d028495	121.888	NoDiff
CHG-LPE-TCdM	Cluster_5671	LPE	CHG	4	TCdM	3'-2k	Zm00001d028782	-0.999838	NoDiff
CHG-LPE-TCdM	Cluster_6081	LPE	CHG	4	TCdM	3'-2k	Zm00001d028896	4.53744	NoDiff
CHG-LPE-TCdM	Cluster_18419	LPE	CHG	23	TCdM	5'-2k	Zm00001d031898	-0.59067	NoDiff
CHG-LPE-TCdM	Cluster_20231	LPE	CHG	25	TCdM	Gene body	Zm00001d032301	0.134749	NoDiff
CHG-LPE-TCdM	Cluster_21714	LPE	CHG	34	TCdM	5'-2k	Zm00001d032672	0.363905	AE
CHG-LPE-TCdM	Cluster_24055	LPE	CHG	35	TCdM	5'-2k	Zm00001d033200	NA	NoDiff
CHG-LPE-TCdM	Cluster_24093	LPE	CHG	26	TCdM	3'-2k	Zm00001d033207	NA	NoDiff
CHG-LPE-TCdM	Cluster_24196	LPE	CHG	5	TCdM	3'-2k	Zm00001d033230	1.37305	NoDiff
CHG-LPE-TCdM	Cluster_26319	LPE	CHG	27	TCdM	5'-2k	Zm00001d033786	-0.0366393	NoDiff
CHG-LPE-TCdM	Cluster_26885	LPE	CHG	27	TCdM	Gene body	Zm00001d033927	0.324566	NoDiff
CHG-LPE-TCdM	Cluster_27205	LPE	CHG	25	TCdM	3'-2k	Zm00001d034022	7.16782	NoDiff
CHG-LPE-TCdM	Cluster_27207	LPE	CHG	10	TCdM	3'-2k	Zm00001d034023	-1.26331	NoDiff
CHG-LPE-TCdM	Cluster_27216	LPE	CHG	14	TCdM	5'-2k	Zm00001d034026	0.675396	NoDiff
CHG-LPE-TCdM	Cluster_29944	LPE	CHG	13	TCdM	5'-2k	Zm00001d034844	NA	NoDiff
CHG-LPE-TCdM	Cluster_121252	LPE	CHG	16	TCdM	5'-2k	Zm00001d035013	-0.952524	DLPE
CHG-LPE-TCdM	Cluster_121706	LPE	CHG	16	TCdM	5'-2k	Zm00001d035163	-1	NoDiff
CHG-LPE-TCdM	Cluster_123881	LPE	CHG	20	TCdM	5'-2k	Zm00001d035642	-1	NoDiff
CHG-LPE-TCdM	Cluster_124040	LPE	CHG	27	TCdM	5'-2k	Zm00001d035683	0.484715	NoDiff
CHG-LPE-TCdM	Cluster_125337	LPE	CHG	43	TCdM	5'-2k	Zm00001d035993	0.831411	NoDiff
CHG-LPE-TCdM	Cluster_127652	LPE	CHG	40	TCdM	Gene body	Zm00001d036613	-0.34472	AE
CHG-LPE-TCdM	Cluster_128084	LPE	CHG	29	TCdM	5'-2k	Zm00001d036712	1.64259	NoDiff
CHG-LPE-TCdM	Cluster_129810	LPE	CHG	11	TCdM	3'-2k	Zm00001d037152	0.447721	NoDiff
CHG-LPE-TCdM	Cluster_133825	LPE	CHG	16	TCdM	5'-2k	Zm00001d038087	0.319681	NoDiff
CHG-LPE-TCdM	Cluster_134547	LPE	CHG	33	TCdM	Gene body	Zm00001d038252	0.377399	NoDiff
CHG-LPE-TCdM	Cluster_134677	LPE	CHG	12	TCdM	3'-2k	Zm00001d038281	-0.687376	NoDiff
CHG-LPE-TCdM	Cluster_135440	LPE	CHG	26	TCdM	5'-2k	Zm00001d038490	NA	NoDiff
CHG-LPE-TCdM	Cluster_136366	LPE	CHG	40	TCdM	3'-2k	Zm00001d038820	0.0872543	AE
CHG-LPE-TCdM	Cluster_136373	LPE	CHG	15	TCdM	Gene body	Zm00001d038823	-0.278999	NoDiff
CHG-LPE-TCdM	Cluster_54157	LPE	CHG	18	TCdM	Gene body	Zm00001d039334	NA	NoDiff
CHG-LPE-TCdM	Cluster_54885	LPE	CHG	43	TCdM	Gene body	Zm00001d039546	0.0805163	AE
CHG-LPE-TCdM	Cluster_57137	LPE	CHG	16	TCdM	3'-2k	Zm00001d040158	2.17311	NoDiff
CHG-LPE-TCdM	Cluster_59706	LPE	CHG	30	TCdM	Gene body	Zm00001d040726	557.968	NoDiff
CHG-LPE-TCdM	Cluster_60630	LPE	CHG	119	TCdM	Gene body	Zm00001d040901	-3.45983	NoDiff
CHG-LPE-TCdM	Cluster_63734	LPE	CHG	6	TCdM	5'-2k	Zm00001d041599	1.65648	NoDiff
CHG-LPE-TCdM	Cluster_64076	LPE	CHG	6	TCdM	3'-2k	Zm00001d041678	0.0881669	AE
CHG-LPE-TCdM	Cluster_64451	LPE	CHG	17	TCdM	Gene body	Zm00001d041777	NA	NoDiff
CHG-LPE-TCdM	Cluster_64452	LPE	CHG	9	TCdM	Gene body	Zm00001d041777	NA	NoDiff
CHG-LPE-TCdM	Cluster_64920	LPE	CHG	17	TCdM	5'-2k	Zm00001d041882	-3.12395	NoDiff
CHG-LPE-TCdM	Cluster_65989	LPE	CHG	104	TCdM	Gene body	Zm00001d042166	0.61147	DHPE
CHG-LPE-TCdM	Cluster_67421	LPE	CHG	38	TCdM	5'-2k	Zm00001d042523	2.26926	NoDiff
CHG-LPE-TCdM	Cluster_67512	LPE	CHG	14	TCdM	5'-2k	Zm00001d042541	-1.0908	DLPE
CHG-LPE-TCdM	Cluster_69156	LPE	CHG	11	TCdM	3'-2k	Zm00001d042926	4.01374	NoDiff
CHG-LPE-TCdM	Cluster_69645	LPE	CHG	102	TCdM	Gene body	Zm00001d043052	-16.2912	NoDiff
CHG-LPE-TCdM	Cluster_71112	LPE	CHG	12	TCdM	Gene body	Zm00001d043393	-1.20528	NoDiff
CHG-LPE-TCdM	Cluster_71427	LPE	CHG	41	TCdM	Gene body	Zm00001d043479	7.53318	NoDiff
CHG-LPE-TCdM	Cluster_71582	LPE	CHG	27	TCdM	Gene body	Zm00001d043520	3.06341	NoDiff
CHG-LPE-TCdM	Cluster_71905	LPE	CHG	10	TCdM	Gene body	Zm00001d043604	-1	NoDiff
CHG-LPE-TCdM	Cluster_72586	LPE	CHG	20	TCdM	3'-2k	Zm00001d043783	-0.256249	NoDiff
CHG-LPE-TCdM	Cluster_73218	LPE	CHG	23	TCdM	5'-2k	Zm00001d043933	NA	NoDiff
CHG-LPE-TCdM	Cluster_73330	LPE	CHG	62	TCdM	3'-2k	Zm00001d043963	-3.38434	NoDiff
CHG-LPE-TCdM	Cluster_73591	LPE	CHG	23	TCdM	5'-2k	Zm00001d044024	5.34082	NoDiff
CHG-LPE-TCdM	Cluster_73721	LPE	CHG	7	TCdM	Gene body	Zm00001d044053	-0.172083	NoDiff
CHG-LPE-TCdM	Cluster_74700	LPE	CHG	8	TCdM	Gene body	Zm00001d044284	0.415852	AE
CHG-LPE-TCdM	Cluster_74747	LPE	CHG	9	TCdM	3'-2k	Zm00001d044297	1.66602	NoDiff
CHG-LPE-TCdM	Cluster_75689	LPE	CHG	31	TCdM	5'-2k	Zm00001d044528	-1.48347	NoDiff
CHG-LPE-TCdM	Cluster_76297	LPE	CHG	47	TCdM	Gene body	Zm00001d044694	-0.0383034	NoDiff
CHG-LPE-TCdM	Cluster_172061	LPE	CHG	25	TCdM	3'-2k	Zm00001d044775	NA	NoDiff
CHG-LPE-TCdM	Cluster_172070	LPE	CHG	10	TCdM	3'-2k	Zm00001d044777	NA	NoDiff
CHG-LPE-TCdM	Cluster_173866	LPE	CHG	14	TCdM	5'-2k	Zm00001d045258	-1.74752	NoDiff
CHG-LPE-TCdM	Cluster_174204	LPE	CHG	19	TCdM	5'-2k	Zm00001d045394	-3.59711	NoDiff
CHG-LPE-TCdM	Cluster_174285	LPE	CHG	50	TCdM	3'-2k	Zm00001d045412	-0.474018	AE
CHG-LPE-TCdM	Cluster_174941	LPE	CHG	35	TCdM	Gene body	Zm00001d045574	4.495	NoDiff
CHG-LPE-TCdM	Cluster_177515	LPE	CHG	11	TCdM	Gene body	Zm00001d046105	-1.50304	NoDiff
CHG-LPE-TCdM	Cluster_177720	LPE	CHG	14	TCdM	3'-2k	Zm00001d046152	NA	NoDiff
CHG-LPE-TCdM	Cluster_180390	LPE	CHG	37	TCdM	Gene body	Zm00001d046691	1.14919	NoDiff
CHG-LPE-TCdM	Cluster_181160	LPE	CHG	10	TCdM	3'-2k	Zm00001d046894	2.25986	NoDiff
CHG-LPE-TCdM	Cluster_181363	LPE	CHG	32	TCdM	5'-2k	Zm00001d046922	9.41921	NoDiff
CHG-LPE-TCdM	Cluster_181471	LPE	CHG	15	TCdM	3'-2k	Zm00001d046939	-0.455756	NoDiff
CHG-LPE-TCdM	Cluster_182270	LPE	CHG	34	TCdM	5'-2k	Zm00001d047113	Inf	NoDiff
CHG-LPE-TCdM	Cluster_184665	LPE	CHG	10	TCdM	3'-2k	Zm00001d047711	-1	NoDiff
CHG-LPE-TCdM	Cluster_184935	LPE	CHG	14	TCdM	Gene body	Zm00001d047781	-1.15038	NoDiff
CHG-LPE-TCdM	Cluster_185629	LPE	CHG	24	TCdM	5'-2k	Zm00001d047974	Inf	NoDiff
CHG-LPE-TCdM	Cluster_185819	LPE	CHG	23	TCdM	5'-2k	Zm00001d048013	-1	NoDiff
CHG-LPE-TCdM	Cluster_186728	LPE	CHG	8	TCdM	5'-2k	Zm00001d048332	-1.38667	NoDiff
CHG-LPE-TCdM	Cluster_187246	LPE	CHG	6	TCdM	3'-2k	Zm00001d048511	-8.65416	NoDiff
CHG-LPE-TCdM	Cluster_76466	LPE	CHG	23	TCdM	3'-2k	Zm00001d048608	20.9776	NoDiff
CHG-LPE-TCdM	Cluster_76478	LPE	CHG	31	TCdM	3'-2k	Zm00001d048615	9.76395	NoDiff
CHG-LPE-TCdM	Cluster_76574	LPE	CHG	28	TCdM	Gene body	Zm00001d048635	2.45734	NoDiff
CHG-LPE-TCdM	Cluster_82909	LPE	CHG	16	TCdM	Gene body	Zm00001d050110	NA	NoDiff
CHG-LPE-TCdM	Cluster_87726	LPE	CHG	10	TCdM	3'-2k	Zm00001d051119	-3.03992	NoDiff
CHG-LPE-TCdM	Cluster_87940	LPE	CHG	18	TCdM	Gene body	Zm00001d051161	-2.90286	TLPE
CHG-LPE-TCdM	Cluster_94616	LPE	CHG	15	TCdM	3'-2k	Zm00001d052981	-0.0947143	NoDiff
CHG-LPE-TCdM	Cluster_95988	LPE	CHG	45	TCdM	Gene body	Zm00001d053196	-1.75884	NoDiff
CHG-LPE-TCdM	Cluster_97693	LPE	CHG	18	TCdM	5'-2k	Zm00001d053587	3.28552	NoDiff
CHH-HPE-TCM	Cluster_31190	HPE	CHH	46	TCM	Gene body	Zm00001d002058	-0.0366006	NoDiff
CHH-HPE-TCM	Cluster_32714	HPE	CHH	230	TCM	5'-2k	Zm00001d002608	NA	NoDiff
CHH-HPE-TCM	Cluster_33003	HPE	CHH	102	TCM	5'-2k	Zm00001d002668	0.925885	DHPE
CHH-HPE-TCM	Cluster_33539	HPE	CHH	87	TCM	3'-2k	Zm00001d002799	-2.02791	NoDiff
CHH-HPE-TCM	Cluster_33713	HPE	CHH	148	TCM	3'-2k	Zm00001d002841	NA	NoDiff
CHH-HPE-TCM	Cluster_34118	HPE	CHH	170	TCM	3'-2k	Zm00001d002959	2.20761	NoDiff
CHH-HPE-TCM	Cluster_36151	HPE	CHH	13	TCM	5'-2k	Zm00001d003554	-0.948149	NoDiff
CHH-HPE-TCM	Cluster_38817	HPE	CHH	102	TCM	Gene body	Zm00001d004074	0.461545	NoDiff
CHH-HPE-TCM	Cluster_41812	HPE	CHH	138	TCM	3'-2k	Zm00001d004664	-1.73476	NoDiff
CHH-HPE-TCM	Cluster_42946	HPE	CHH	112	TCM	3'-2k	Zm00001d004848	-1.41619	NoDiff
CHH-HPE-TCM	Cluster_48356	HPE	CHH	153	TCM	3'-2k	Zm00001d006161	Inf	NoDiff
CHH-HPE-TCM	Cluster_48684	HPE	CHH	98	TCM	5'-2k	Zm00001d006257	-0.0568404	AE
CHH-HPE-TCM	Cluster_49340	HPE	CHH	108	TCM	5'-2k	Zm00001d006450	-1.00344	DLPE
CHH-HPE-TCM	Cluster_49539	HPE	CHH	95	TCM	5'-2k	Zm00001d006511	-3.66773	NoDiff
CHH-HPE-TCM	Cluster_50096	HPE	CHH	129	TCM	3'-2k	Zm00001d006681	0.642852	NoDiff
CHH-HPE-TCM	Cluster_50409	HPE	CHH	56	TCM	5'-2k	Zm00001d006789	-1.8508	NoDiff
CHH-HPE-TCM	Cluster_52872	HPE	CHH	56	TCM	5'-2k	Zm00001d007605	-0.18341	AE
CHH-HPE-TCM	Cluster_52975	HPE	CHH	49	TCM	5'-2k	Zm00001d007639	1.73409	NoDiff
CHH-HPE-TCM	Cluster_53074	HPE	CHH	57	TCM	5'-2k	Zm00001d007679	5.73924	NoDiff
CHH-HPE-TCM	Cluster_53666	HPE	CHH	123	TCM	5'-2k	Zm00001d007896	2.01309	THPE
CHH-HPE-TCM	Cluster_154788	HPE	CHH	75	TCM	5'-2k	Zm00001d008312	0.632303	DHPE
CHH-HPE-TCM	Cluster_159715	HPE	CHH	35	TCM	5'-2k	Zm00001d009588	-1	NoDiff
CHH-HPE-TCM	Cluster_162194	HPE	CHH	72	TCM	3'-2k	Zm00001d010129	0.568082	NoDiff
CHH-HPE-TCM	Cluster_162505	HPE	CHH	51	TCM	Gene body	Zm00001d010205	0.33753	NoDiff
CHH-HPE-TCM	Cluster_162916	HPE	CHH	12	TCM	5'-2k	Zm00001d010290	-3.33248	NoDiff
CHH-HPE-TCM	Cluster_164127	HPE	CHH	119	TCM	3'-2k	Zm00001d010538	0.780121	NoDiff
CHH-HPE-TCM	Cluster_164491	HPE	CHH	190	TCM	3'-2k	Zm00001d010648	-0.0996424	AE
CHH-HPE-TCM	Cluster_164748	HPE	CHH	108	TCM	3'-2k	Zm00001d010703	0.429461	NoDiff
CHH-HPE-TCM	Cluster_166585	HPE	CHH	88	TCM	5'-2k	Zm00001d011228	-1.79578	NoDiff
CHH-HPE-TCM	Cluster_166969	HPE	CHH	117	TCM	5'-2k	Zm00001d011350	1.07866	NoDiff
CHH-HPE-TCM	Cluster_167143	HPE	CHH	71	TCM	3'-2k	Zm00001d011392	-0.692543	NoDiff
CHH-HPE-TCM	Cluster_167717	HPE	CHH	326	TCM	3'-2k	Zm00001d011541	1.34958	NoDiff
CHH-HPE-TCM	Cluster_167829	HPE	CHH	88	TCM	Gene body	Zm00001d011572	6.61395	NoDiff
CHH-HPE-TCM	Cluster_168278	HPE	CHH	112	TCM	Gene body	Zm00001d011660	-0.0047796	NoDiff
CHH-HPE-TCM	Cluster_168818	HPE	CHH	61	TCM	5'-2k	Zm00001d011793	NA	NoDiff
CHH-HPE-TCM	Cluster_169166	HPE	CHH	38	TCM	3'-2k	Zm00001d011904	-0.269665	NoDiff
CHH-HPE-TCM	Cluster_169632	HPE	CHH	38	TCM	3'-2k	Zm00001d012061	-0.241728	NoDiff
CHH-HPE-TCM	Cluster_169888	HPE	CHH	74	TCM	5'-2k	Zm00001d012170	-23.049	NoDiff
CHH-HPE-TCM	Cluster_170352	HPE	CHH	38	TCM	5'-2k	Zm00001d012321	-0.809637	NoDiff
CHH-HPE-TCM	Cluster_99450	HPE	CHH	295	TCM	3'-2k	Zm00001d012890	-162.507	NoDiff
CHH-HPE-TCM	Cluster_99530	HPE	CHH	278	TCM	5'-2k	Zm00001d012924	4.5834	NoDiff
CHH-HPE-TCM	Cluster_100112	HPE	CHH	152	TCM	3'-2k	Zm00001d013168	-1.08272	NoDiff
CHH-HPE-TCM	Cluster_100344	HPE	CHH	104	TCM	5'-2k	Zm00001d013263	0.255305	NoDiff
CHH-HPE-TCM	Cluster_100348	HPE	CHH	323	TCM	Gene body	Zm00001d013265	-3.58859	NoDiff
CHH-HPE-TCM	Cluster_100507	HPE	CHH	134	TCM	5'-2k	Zm00001d013319	-3.33426	NoDiff
CHH-HPE-TCM	Cluster_102940	HPE	CHH	33	TCM	3'-2k	Zm00001d014015	0.108002	NoDiff
CHH-HPE-TCM	Cluster_103542	HPE	CHH	35	TCM	Gene body	Zm00001d014152	0.0593196	NoDiff
CHH-HPE-TCM	Cluster_105314	HPE	CHH	80	TCM	5'-2k	Zm00001d014492	-0.579769	NoDiff
CHH-HPE-TCM	Cluster_106914	HPE	CHH	155	TCM	5'-2k	Zm00001d014890	-3.16841	NoDiff
CHH-HPE-TCM	Cluster_107131	HPE	CHH	43	TCM	5'-2k	Zm00001d014954	-2.47169	NoDiff
CHH-HPE-TCM	Cluster_108137	HPE	CHH	156	TCM	3'-2k	Zm00001d015274	-0.0693148	NoDiff
CHH-HPE-TCM	Cluster_108851	HPE	CHH	138	TCM	Gene body	Zm00001d015457	2.17457	THPE
CHH-HPE-TCM	Cluster_109272	HPE	CHH	269	TCM	3'-2k	Zm00001d015538	-0.332655	AE
CHH-HPE-TCM	Cluster_109776	HPE	CHH	190	TCM	3'-2k	Zm00001d015657	-1.55642	NoDiff
CHH-HPE-TCM	Cluster_115295	HPE	CHH	60	TCM	5'-2k	Zm00001d016825	1.05085	NoDiff
CHH-HPE-TCM	Cluster_116855	HPE	CHH	9	TCM	3'-2k	Zm00001d017302	NA	NoDiff
CHH-HPE-TCM	Cluster_117563	HPE	CHH	63	TCM	Gene body	Zm00001d017507	6.39	NoDiff
CHH-HPE-TCM	Cluster_117955	HPE	CHH	68	TCM	Gene body	Zm00001d017607	-87.5956	NoDiff
CHH-HPE-TCM	Cluster_118463	HPE	CHH	65	TCM	3'-2k	Zm00001d017742	-2.26345	NoDiff
CHH-HPE-TCM	Cluster_118849	HPE	CHH	66	TCM	3'-2k	Zm00001d017843	NA	NoDiff
CHH-HPE-TCM	Cluster_119073	HPE	CHH	11	TCM	5'-2k	Zm00001d017926	10.5458	NoDiff
CHH-HPE-TCM	Cluster_119108	HPE	CHH	21	TCM	Gene body	Zm00001d017937	-0.356796	AE
CHH-HPE-TCM	Cluster_119334	HPE	CHH	212	TCM	3'-2k	Zm00001d017994	5.30961	NoDiff
CHH-HPE-TCM	Cluster_137849	HPE	CHH	72	TCM	5'-2k	Zm00001d018686	-0.983465	NoDiff
CHH-HPE-TCM	Cluster_137897	HPE	CHH	135	TCM	5'-2k	Zm00001d018712	-0.451131	NoDiff
CHH-HPE-TCM	Cluster_140459	HPE	CHH	42	TCM	3'-2k	Zm00001d019372	-2.55673	NoDiff
CHH-HPE-TCM	Cluster_143466	HPE	CHH	236	TCM	5'-2k	Zm00001d019978	0.375162	NoDiff
CHH-HPE-TCM	Cluster_144079	HPE	CHH	84	TCM	5'-2k	Zm00001d020062	-6.79261	NoDiff
CHH-HPE-TCM	Cluster_144799	HPE	CHH	11	TCM	3'-2k	Zm00001d020208	1.22762	NoDiff
CHH-HPE-TCM	Cluster_147046	HPE	CHH	340	TCM	3'-2k	Zm00001d020622	-1.44103	NoDiff
CHH-HPE-TCM	Cluster_148111	HPE	CHH	50	TCM	5'-2k	Zm00001d020882	0.18697	AE
CHH-HPE-TCM	Cluster_150072	HPE	CHH	18	TCM	5'-2k	Zm00001d021453	0.215381	NoDiff
CHH-HPE-TCM	Cluster_151736	HPE	CHH	121	TCM	5'-2k	Zm00001d021869	-0.151766	NoDiff
CHH-HPE-TCM	Cluster_191649	HPE	CHH	199	TCM	3'-2k	Zm00001d024239	-0.586911	NoDiff
CHH-HPE-TCM	Cluster_192046	HPE	CHH	131	TCM	3'-2k	Zm00001d024320	NA	NoDiff
CHH-HPE-TCM	Cluster_192586	HPE	CHH	75	TCM	5'-2k	Zm00001d024436	NA	NoDiff
CHH-HPE-TCM	Cluster_193378	HPE	CHH	48	TCM	Gene body	Zm00001d024595	3.73062	NoDiff
CHH-HPE-TCM	Cluster_194115	HPE	CHH	147	TCM	3'-2k	Zm00001d024783	1.12456	NoDiff
CHH-HPE-TCM	Cluster_194510	HPE	CHH	32	TCM	5'-2k	Zm00001d024879	NA	NoDiff
CHH-HPE-TCM	Cluster_196580	HPE	CHH	254	TCM	Gene body	Zm00001d025264	-1.17726	NoDiff
CHH-HPE-TCM	Cluster_197154	HPE	CHH	40	TCM	3'-2k	Zm00001d025398	1.06974	NoDiff
CHH-HPE-TCM	Cluster_198840	HPE	CHH	56	TCM	3'-2k	Zm00001d025872	-4.07665	NoDiff
CHH-HPE-TCM	Cluster_199872	HPE	CHH	98	TCM	3'-2k	Zm00001d026180	NA	NoDiff
CHH-HPE-TCM	Cluster_200402	HPE	CHH	50	TCM	3'-2k	Zm00001d026348	-0.515898	NoDiff
CHH-HPE-TCM	Cluster_200528	HPE	CHH	119	TCM	5'-2k	Zm00001d026387	-0.205226	AE
CHH-HPE-TCM	Cluster_200827	HPE	CHH	76	TCM	3'-2k	Zm00001d026489	-0.97027	DLPE
CHH-HPE-TCM	Cluster_200891	HPE	CHH	64	TCM	5'-2k	Zm00001d026514	-0.897196	NoDiff
CHH-HPE-TCM	Cluster_200894	HPE	CHH	184	TCM	5'-2k	Zm00001d026515	-0.118133	NoDiff
CHH-HPE-TCM	Cluster_1121	HPE	CHH	204	TCM	5'-2k	Zm00001d027558	-0.805372	NoDiff
CHH-HPE-TCM	Cluster_2238	HPE	CHH	149	TCM	Gene body	Zm00001d027868	1.30581	NoDiff
CHH-HPE-TCM	Cluster_3092	HPE	CHH	151	TCM	5'-2k	Zm00001d028089	0.866407	NoDiff
CHH-HPE-TCM	Cluster_4542	HPE	CHH	92	TCM	5'-2k	Zm00001d028458	-0.444519	AE
CHH-HPE-TCM	Cluster_4963	HPE	CHH	91	TCM	Gene body	Zm00001d028576	-3.31574	NoDiff
CHH-HPE-TCM	Cluster_5711	HPE	CHH	124	TCM	5'-2k	Zm00001d028798	3.57255	NoDiff
CHH-HPE-TCM	Cluster_5775	HPE	CHH	46	TCM	5'-2k	Zm00001d028811	-0.113167	NoDiff
CHH-HPE-TCM	Cluster_6730	HPE	CHH	218	TCM	5'-2k	Zm00001d029059	3.43159	NoDiff
CHH-HPE-TCM	Cluster_7712	HPE	CHH	73	TCM	5'-2k	Zm00001d029321	-0.289088	AE
CHH-HPE-TCM	Cluster_8006	HPE	CHH	92	TCM	5'-2k	Zm00001d029396	1.45289	NoDiff
CHH-HPE-TCM	Cluster_8216	HPE	CHH	39	TCM	5'-2k	Zm00001d029448	-0.978592	DLPE
CHH-HPE-TCM	Cluster_8291	HPE	CHH	88	TCM	5'-2k	Zm00001d029462	0.459517	NoDiff
CHH-HPE-TCM	Cluster_8616	HPE	CHH	102	TCM	Gene body	Zm00001d029528	NA	NoDiff
CHH-HPE-TCM	Cluster_8737	HPE	CHH	249	TCM	5'-2k	Zm00001d029560	1.84114	NoDiff
CHH-HPE-TCM	Cluster_8736	HPE	CHH	64	TCM	3'-2k	Zm00001d029560	1.84114	NoDiff
CHH-HPE-TCM	Cluster_9423	HPE	CHH	174	TCM	5'-2k	Zm00001d029719	-1.83772	NoDiff
CHH-HPE-TCM	Cluster_10376	HPE	CHH	109	TCM	3'-2k	Zm00001d029938	-4.30951	NoDiff
CHH-HPE-TCM	Cluster_12561	HPE	CHH	139	TCM	3'-2k	Zm00001d030393	0.738892	NoDiff
CHH-HPE-TCM	Cluster_13653	HPE	CHH	98	TCM	5'-2k	Zm00001d030614	-0.388846	NoDiff
CHH-HPE-TCM	Cluster_14811	HPE	CHH	17	TCM	3'-2k	Zm00001d030860	-0.411676	NoDiff
CHH-HPE-TCM	Cluster_15289	HPE	CHH	115	TCM	5'-2k	Zm00001d030945	2.08642	NoDiff
CHH-HPE-TCM	Cluster_16415	HPE	CHH	246	TCM	5'-2k	Zm00001d031221	-1	NoDiff
CHH-HPE-TCM	Cluster_17370	HPE	CHH	176	TCM	Gene body	Zm00001d031573	-0.970206	NoDiff
CHH-HPE-TCM	Cluster_19281	HPE	CHH	103	TCM	5'-2k	Zm00001d032102	0.30748	NoDiff
CHH-HPE-TCM	Cluster_19861	HPE	CHH	20	TCM	3'-2k	Zm00001d032223	-1.79953	NoDiff
CHH-HPE-TCM	Cluster_20043	HPE	CHH	100	TCM	5'-2k	Zm00001d032265	-1.14452	NoDiff
CHH-HPE-TCM	Cluster_20624	HPE	CHH	71	TCM	5'-2k	Zm00001d032380	3.81358	NoDiff
CHH-HPE-TCM	Cluster_22148	HPE	CHH	11	TCM	3'-2k	Zm00001d032773	0.196523	NoDiff
CHH-HPE-TCM	Cluster_22364	HPE	CHH	195	TCM	Gene body	Zm00001d032828	13.1696	THPE
CHH-HPE-TCM	Cluster_23982	HPE	CHH	46	TCM	3'-2k	Zm00001d033181	43.256	NoDiff
CHH-HPE-TCM	Cluster_25850	HPE	CHH	116	TCM	3'-2k	Zm00001d033656	NA	NoDiff
CHH-HPE-TCM	Cluster_26848	HPE	CHH	115	TCM	5'-2k	Zm00001d033917	-11.2447	NoDiff
CHH-HPE-TCM	Cluster_29404	HPE	CHH	200	TCM	5'-2k	Zm00001d034657	NA	NoDiff
CHH-HPE-TCM	Cluster_29597	HPE	CHH	196	TCM	5'-2k	Zm00001d034733	-0.595002	NoDiff
CHH-HPE-TCM	Cluster_121428	HPE	CHH	32	TCM	5'-2k	Zm00001d035079	0.0195649	NoDiff
CHH-HPE-TCM	Cluster_123592	HPE	CHH	79	TCM	5'-2k	Zm00001d035578	-1.16517	NoDiff
CHH-HPE-TCM	Cluster_124940	HPE	CHH	260	TCM	5'-2k	Zm00001d035903	NA	NoDiff
CHH-HPE-TCM	Cluster_126018	HPE	CHH	59	TCM	5'-2k	Zm00001d036137	0.60081	NoDiff
CHH-HPE-TCM	Cluster_126262	HPE	CHH	318	TCM	5'-2k	Zm00001d036216	-5.40338	NoDiff
CHH-HPE-TCM	Cluster_126466	HPE	CHH	35	TCM	5'-2k	Zm00001d036275	-2.50051	NoDiff
CHH-HPE-TCM	Cluster_127494	HPE	CHH	55	TCM	3'-2k	Zm00001d036570	-7.79238	NoDiff
CHH-HPE-TCM	Cluster_128741	HPE	CHH	87	TCM	3'-2k	Zm00001d036878	1.23712	NoDiff
CHH-HPE-TCM	Cluster_129189	HPE	CHH	247	TCM	5'-2k	Zm00001d037010	57.4662	NoDiff
CHH-HPE-TCM	Cluster_130168	HPE	CHH	12	TCM	5'-2k	Zm00001d037236	-1.17238	NoDiff
CHH-HPE-TCM	Cluster_130176	HPE	CHH	52	TCM	5'-2k	Zm00001d037239	-13.6815	NoDiff
CHH-HPE-TCM	Cluster_130388	HPE	CHH	207	TCM	5'-2k	Zm00001d037290	1.01027	NoDiff
CHH-HPE-TCM	Cluster_132687	HPE	CHH	62	TCM	5'-2k	Zm00001d037787	-1.34244	NoDiff
CHH-HPE-TCM	Cluster_133731	HPE	CHH	98	TCM	5'-2k	Zm00001d038059	-0.478027	NoDiff
CHH-HPE-TCM	Cluster_134912	HPE	CHH	109	TCM	5'-2k	Zm00001d038337	0.341718	NoDiff
CHH-HPE-TCM	Cluster_135236	HPE	CHH	114	TCM	Gene body	Zm00001d038440	-0.213798	NoDiff
CHH-HPE-TCM	Cluster_135909	HPE	CHH	157	TCM	3'-2k	Zm00001d038665	-0.0589513	NoDiff
CHH-HPE-TCM	Cluster_135950	HPE	CHH	268	TCM	5'-2k	Zm00001d038682	-0.34685	NoDiff
CHH-HPE-TCM	Cluster_136201	HPE	CHH	219	TCM	5'-2k	Zm00001d038765	0.180171	AE
CHH-HPE-TCM	Cluster_136655	HPE	CHH	91	TCM	3'-2k	Zm00001d038922	-0.116952	NoDiff
CHH-HPE-TCM	Cluster_53992	HPE	CHH	126	TCM	5'-2k	Zm00001d039270	4.84052	NoDiff
CHH-HPE-TCM	Cluster_54501	HPE	CHH	128	TCM	5'-2k	Zm00001d039455	-0.690577	NoDiff
CHH-HPE-TCM	Cluster_55745	HPE	CHH	136	TCM	5'-2k	Zm00001d039822	-0.808618	NoDiff
CHH-HPE-TCM	Cluster_56002	HPE	CHH	230	TCM	3'-2k	Zm00001d039898	-3.55274	NoDiff
CHH-HPE-TCM	Cluster_56613	HPE	CHH	184	TCM	Gene body	Zm00001d040046	-0.548749	NoDiff
CHH-HPE-TCM	Cluster_59973	HPE	CHH	228	TCM	5'-2k	Zm00001d040775	-0.512484	DLPE
CHH-HPE-TCM	Cluster_62166	HPE	CHH	99	TCM	5'-2k	Zm00001d041215	7.18896	NoDiff
CHH-HPE-TCM	Cluster_62575	HPE	CHH	117	TCM	5'-2k	Zm00001d041331	-0.103127	AE
CHH-HPE-TCM	Cluster_64265	HPE	CHH	63	TCM	5'-2k	Zm00001d041742	NA	NoDiff
CHH-HPE-TCM	Cluster_64990	HPE	CHH	134	TCM	Gene body	Zm00001d041911	0.599333	NoDiff
CHH-HPE-TCM	Cluster_65716	HPE	CHH	7	TCM	5'-2k	Zm00001d042107	2.02685	NoDiff
CHH-HPE-TCM	Cluster_67353	HPE	CHH	116	TCM	5'-2k	Zm00001d042498	2.50257	NoDiff
CHH-HPE-TCM	Cluster_68622	HPE	CHH	80	TCM	5'-2k	Zm00001d042800	4.26037	NoDiff
CHH-HPE-TCM	Cluster_68786	HPE	CHH	15	TCM	5'-2k	Zm00001d042832	NA	NoDiff
CHH-HPE-TCM	Cluster_69648	HPE	CHH	165	TCM	3'-2k	Zm00001d043052	-16.2912	NoDiff
CHH-HPE-TCM	Cluster_69998	HPE	CHH	142	TCM	3'-2k	Zm00001d043151	0.104898	AE
CHH-HPE-TCM	Cluster_70268	HPE	CHH	16	TCM	3'-2k	Zm00001d043217	-1.94345	NoDiff
CHH-HPE-TCM	Cluster_71421	HPE	CHH	165	TCM	5'-2k	Zm00001d043477	0.869863	NoDiff
CHH-HPE-TCM	Cluster_71881	HPE	CHH	69	TCM	3'-2k	Zm00001d043599	0.0885427	NoDiff
CHH-HPE-TCM	Cluster_71882	HPE	CHH	105	TCM	3'-2k	Zm00001d043600	-0.889059	DLPE
CHH-HPE-TCM	Cluster_72437	HPE	CHH	94	TCM	3'-2k	Zm00001d043742	-0.599536	NoDiff
CHH-HPE-TCM	Cluster_72566	HPE	CHH	146	TCM	3'-2k	Zm00001d043779	-1.94941	NoDiff
CHH-HPE-TCM	Cluster_75559	HPE	CHH	63	TCM	5'-2k	Zm00001d044502	0.0267511	AE
CHH-HPE-TCM	Cluster_76213	HPE	CHH	65	TCM	5'-2k	Zm00001d044675	NA	NoDiff
CHH-HPE-TCM	Cluster_172260	HPE	CHH	152	TCM	5'-2k	Zm00001d044823	8.8055	NoDiff
CHH-HPE-TCM	Cluster_174025	HPE	CHH	98	TCM	3'-2k	Zm00001d045324	1.14203	NoDiff
CHH-HPE-TCM	Cluster_174068	HPE	CHH	129	TCM	5'-2k	Zm00001d045351	-1.99986	NoDiff
CHH-HPE-TCM	Cluster_178853	HPE	CHH	34	TCM	Gene body	Zm00001d046374	13.5387	NoDiff
CHH-HPE-TCM	Cluster_179690	HPE	CHH	142	TCM	5'-2k	Zm00001d046545	5.40678	NoDiff
CHH-HPE-TCM	Cluster_179737	HPE	CHH	131	TCM	3'-2k	Zm00001d046560	NA	NoDiff
CHH-HPE-TCM	Cluster_180526	HPE	CHH	83	TCM	3'-2k	Zm00001d046725	NA	NoDiff
CHH-HPE-TCM	Cluster_181467	HPE	CHH	280	TCM	Gene body	Zm00001d046938	-4.29196	NoDiff
CHH-HPE-TCM	Cluster_181492	HPE	CHH	81	TCM	Gene body	Zm00001d046945	0.194983	NoDiff
CHH-HPE-TCM	Cluster_181573	HPE	CHH	63	TCM	3'-2k	Zm00001d046958	2.06583	NoDiff
CHH-HPE-TCM	Cluster_181631	HPE	CHH	38	TCM	3'-2k	Zm00001d046971	56.4348	NoDiff
CHH-HPE-TCM	Cluster_183812	HPE	CHH	71	TCM	Gene body	Zm00001d047528	11.4967	NoDiff
CHH-HPE-TCM	Cluster_184030	HPE	CHH	69	TCM	3'-2k	Zm00001d047563	-0.419481	NoDiff
CHH-HPE-TCM	Cluster_184742	HPE	CHH	71	TCM	5'-2k	Zm00001d047737	1.71476	DHPE
CHH-HPE-TCM	Cluster_185980	HPE	CHH	143	TCM	3'-2k	Zm00001d048079	-0.804826	NoDiff
CHH-HPE-TCM	Cluster_186180	HPE	CHH	83	TCM	3'-2k	Zm00001d048145	1.0276	DHPE
CHH-HPE-TCM	Cluster_186312	HPE	CHH	26	TCM	5'-2k	Zm00001d048183	NA	NoDiff
CHH-HPE-TCM	Cluster_186704	HPE	CHH	117	TCM	5'-2k	Zm00001d048315	0.257123	AE
CHH-HPE-TCM	Cluster_187320	HPE	CHH	12	TCM	5'-2k	Zm00001d048536	-10.3637	NoDiff
CHH-HPE-TCM	Cluster_76884	HPE	CHH	98	TCM	5'-2k	Zm00001d048709	0.890391	NoDiff
CHH-HPE-TCM	Cluster_77686	HPE	CHH	54	TCM	3'-2k	Zm00001d048948	0.987514	NoDiff
CHH-HPE-TCM	Cluster_77779	HPE	CHH	14	TCM	3'-2k	Zm00001d048968	11.4227	NoDiff
CHH-HPE-TCM	Cluster_78298	HPE	CHH	116	TCM	3'-2k	Zm00001d049084	NA	NoDiff
CHH-HPE-TCM	Cluster_81114	HPE	CHH	281	TCM	Gene body	Zm00001d049770	-2.96254	NoDiff
CHH-HPE-TCM	Cluster_81850	HPE	CHH	111	TCM	3'-2k	Zm00001d049910	-0.696668	DLPE
CHH-HPE-TCM	Cluster_82711	HPE	CHH	45	TCM	3'-2k	Zm00001d050061	0.422511	NoDiff
CHH-HPE-TCM	Cluster_85225	HPE	CHH	133	TCM	5'-2k	Zm00001d050567	0.918621	NoDiff
CHH-HPE-TCM	Cluster_86919	HPE	CHH	11	TCM	Gene body	Zm00001d050911	2.69181	NoDiff
CHH-HPE-TCM	Cluster_88453	HPE	CHH	26	TCM	5'-2k	Zm00001d051306	6.55374	NoDiff
CHH-HPE-TCM	Cluster_88993	HPE	CHH	58	TCM	3'-2k	Zm00001d051424	-0.0994892	NoDiff
CHH-HPE-TCM	Cluster_90100	HPE	CHH	61	TCM	5'-2k	Zm00001d051725	-0.258757	AE
CHH-HPE-TCM	Cluster_90200	HPE	CHH	79	TCM	5'-2k	Zm00001d051759	1.58435	NoDiff
CHH-HPE-TCM	Cluster_90368	HPE	CHH	186	TCM	5'-2k	Zm00001d051816	-1.98741	NoDiff
CHH-HPE-TCM	Cluster_90916	HPE	CHH	49	TCM	5'-2k	Zm00001d051980	-1248.26	NoDiff
CHH-HPE-TCM	Cluster_90964	HPE	CHH	117	TCM	5'-2k	Zm00001d052009	-0.168452	NoDiff
CHH-HPE-TCM	Cluster_91874	HPE	CHH	96	TCM	3'-2k	Zm00001d052229	9.26942	NoDiff
CHH-HPE-TCM	Cluster_95220	HPE	CHH	78	TCM	5'-2k	Zm00001d053068	-0.285694	AE
CHH-HPE-TCM	Cluster_96093	HPE	CHH	171	TCM	3'-2k	Zm00001d053214	-1	NoDiff
CHH-HPE-TCM	Cluster_98633	HPE	CHH	95	TCM	5'-2k	Zm00001d053848	-32.068	NoDiff
CHH-HPE-TCM	Cluster_98707	HPE	CHH	106	TCM	5'-2k	Zm00001d053888	0.0158007	AE
CHH-HPE-TCM	Cluster_98996	HPE	CHH	188	TCM	Gene body	Zm00001d054017	-4.43362	NoDiff
CHH-HPE-TCM	Cluster_99006	HPE	CHH	212	TCM	Gene body	Zm00001d054031	0.0538949	AE
CHH-LPE-TCdM	Cluster_201640	LPE	CHH	51	TCdM	3'-2k	Zm00001d000001	-0.752013	DLPE
CHH-LPE-TCdM	Cluster_203403	LPE	CHH	142	TCdM	5'-2k	Zm00001d000419	0.244317	NoDiff
CHH-LPE-TCdM	Cluster_30788	LPE	CHH	102	TCdM	3'-2k	Zm00001d001894	0.593769	NoDiff
CHH-LPE-TCdM	Cluster_31427	LPE	CHH	73	TCdM	5'-2k	Zm00001d002140	1.88413	NoDiff
CHH-LPE-TCdM	Cluster_31511	LPE	CHH	73	TCdM	5'-2k	Zm00001d002174	0.746897	DHPE
CHH-LPE-TCdM	Cluster_31537	LPE	CHH	64	TCdM	5'-2k	Zm00001d002179	1.25973	NoDiff
CHH-LPE-TCdM	Cluster_31618	LPE	CHH	53	TCdM	3'-2k	Zm00001d002213	0.30869	NoDiff
CHH-LPE-TCdM	Cluster_32193	LPE	CHH	80	TCdM	5'-2k	Zm00001d002422	0.750666	NoDiff
CHH-LPE-TCdM	Cluster_32245	LPE	CHH	28	TCdM	5'-2k	Zm00001d002437	1.51115	NoDiff
CHH-LPE-TCdM	Cluster_32652	LPE	CHH	179	TCdM	Gene body	Zm00001d002585	-1.19799	NoDiff
CHH-LPE-TCdM	Cluster_33519	LPE	CHH	23	TCdM	3'-2k	Zm00001d002794	0.590311	DHPE
CHH-LPE-TCdM	Cluster_33522	LPE	CHH	43	TCdM	Gene body	Zm00001d002794	0.590311	DHPE
CHH-LPE-TCdM	Cluster_34570	LPE	CHH	58	TCdM	3'-2k	Zm00001d003085	1.64598	NoDiff
CHH-LPE-TCdM	Cluster_35763	LPE	CHH	38	TCdM	5'-2k	Zm00001d003409	0.24355	NoDiff
CHH-LPE-TCdM	Cluster_35860	LPE	CHH	160	TCdM	5'-2k	Zm00001d003445	0.599791	DHPE
CHH-LPE-TCdM	Cluster_36068	LPE	CHH	102	TCdM	3'-2k	Zm00001d003513	38.7951	NoDiff
CHH-LPE-TCdM	Cluster_37888	LPE	CHH	136	TCdM	3'-2k	Zm00001d003914	NA	NoDiff
CHH-LPE-TCdM	Cluster_37917	LPE	CHH	98	TCdM	3'-2k	Zm00001d003917	-8.33478	NoDiff
CHH-LPE-TCdM	Cluster_40204	LPE	CHH	151	TCdM	Gene body	Zm00001d004333	0.688407	DHPE
CHH-LPE-TCdM	Cluster_40942	LPE	CHH	127	TCdM	3'-2k	Zm00001d004466	-2.67249	NoDiff
CHH-LPE-TCdM	Cluster_43986	LPE	CHH	44	TCdM	5'-2k	Zm00001d005063	7.11939	NoDiff
CHH-LPE-TCdM	Cluster_44391	LPE	CHH	59	TCdM	Gene body	Zm00001d005154	0.999108	DHPE
CHH-LPE-TCdM	Cluster_45557	LPE	CHH	155	TCdM	5'-2k	Zm00001d005424	-1.97771	NoDiff
CHH-LPE-TCdM	Cluster_46457	LPE	CHH	53	TCdM	5'-2k	Zm00001d005671	0.0316448	NoDiff
CHH-LPE-TCdM	Cluster_46468	LPE	CHH	171	TCdM	3'-2k	Zm00001d005675	-1.85506	NoDiff
CHH-LPE-TCdM	Cluster_46701	LPE	CHH	110	TCdM	5'-2k	Zm00001d005727	-0.639901	NoDiff
CHH-LPE-TCdM	Cluster_47291	LPE	CHH	16	TCdM	Gene body	Zm00001d005833	12.3416	NoDiff
CHH-LPE-TCdM	Cluster_47358	LPE	CHH	7	TCdM	5'-2k	Zm00001d005853	NA	NoDiff
CHH-LPE-TCdM	Cluster_47362	LPE	CHH	61	TCdM	5'-2k	Zm00001d005859	0.74218	NoDiff
CHH-LPE-TCdM	Cluster_47664	LPE	CHH	8	TCdM	5'-2k	Zm00001d005945	3.10013	NoDiff
CHH-LPE-TCdM	Cluster_49648	LPE	CHH	88	TCdM	Gene body	Zm00001d006551	-3.11143	NoDiff
CHH-LPE-TCdM	Cluster_49750	LPE	CHH	353	TCdM	5'-2k	Zm00001d006582	-20.0744	NoDiff
CHH-LPE-TCdM	Cluster_49787	LPE	CHH	74	TCdM	3'-2k	Zm00001d006587	7.83776	NoDiff
CHH-LPE-TCdM	Cluster_50194	LPE	CHH	28	TCdM	5'-2k	Zm00001d006714	-0.858442	NoDiff
CHH-LPE-TCdM	Cluster_50314	LPE	CHH	74	TCdM	3'-2k	Zm00001d006754	-0.343581	NoDiff
CHH-LPE-TCdM	Cluster_50365	LPE	CHH	68	TCdM	5'-2k	Zm00001d006768	38.1119	NoDiff
CHH-LPE-TCdM	Cluster_50820	LPE	CHH	54	TCdM	5'-2k	Zm00001d006937	NA	NoDiff
CHH-LPE-TCdM	Cluster_51308	LPE	CHH	57	TCdM	3'-2k	Zm00001d007187	0.590275	NoDiff
CHH-LPE-TCdM	Cluster_51323	LPE	CHH	9	TCdM	5'-2k	Zm00001d007191	-1.13078	DLPE
CHH-LPE-TCdM	Cluster_52978	LPE	CHH	99	TCdM	Gene body	Zm00001d007642	-1	NoDiff
CHH-LPE-TCdM	Cluster_53687	LPE	CHH	182	TCdM	Gene body	Zm00001d007900	0.536343	NoDiff
CHH-LPE-TCdM	Cluster_53841	LPE	CHH	14	TCdM	3'-2k	Zm00001d007945	-0.75092	NoDiff
CHH-LPE-TCdM	Cluster_154738	LPE	CHH	50	TCdM	3'-2k	Zm00001d008300	NA	NoDiff
CHH-LPE-TCdM	Cluster_154871	LPE	CHH	11	TCdM	Gene body	Zm00001d008332	NA	NoDiff
CHH-LPE-TCdM	Cluster_154907	LPE	CHH	13	TCdM	3'-2k	Zm00001d008343	-0.618958	NoDiff
CHH-LPE-TCdM	Cluster_155007	LPE	CHH	146	TCdM	3'-2k	Zm00001d008369	-0.942243	NoDiff
CHH-LPE-TCdM	Cluster_155269	LPE	CHH	99	TCdM	Gene body	Zm00001d008445	NA	NoDiff
CHH-LPE-TCdM	Cluster_155826	LPE	CHH	81	TCdM	3'-2k	Zm00001d008597	10.1831	NoDiff
CHH-LPE-TCdM	Cluster_155855	LPE	CHH	293	TCdM	3'-2k	Zm00001d008600	0.145113	AE
CHH-LPE-TCdM	Cluster_156297	LPE	CHH	68	TCdM	3'-2k	Zm00001d008762	-0.134811	NoDiff
CHH-LPE-TCdM	Cluster_156969	LPE	CHH	140	TCdM	5'-2k	Zm00001d008939	4.32869	THPE
CHH-LPE-TCdM	Cluster_157142	LPE	CHH	115	TCdM	3'-2k	Zm00001d008980	-0.338094	NoDiff
CHH-LPE-TCdM	Cluster_157682	LPE	CHH	286	TCdM	5'-2k	Zm00001d009108	-1.15961	NoDiff
CHH-LPE-TCdM	Cluster_158208	LPE	CHH	38	TCdM	5'-2k	Zm00001d009237	NA	NoDiff
CHH-LPE-TCdM	Cluster_159129	LPE	CHH	26	TCdM	5'-2k	Zm00001d009430	38.2648	NoDiff
CHH-LPE-TCdM	Cluster_159759	LPE	CHH	85	TCdM	3'-2k	Zm00001d009599	-0.0522244	NoDiff
CHH-LPE-TCdM	Cluster_159992	LPE	CHH	219	TCdM	5'-2k	Zm00001d009661	-1.08152	NoDiff
CHH-LPE-TCdM	Cluster_160004	LPE	CHH	66	TCdM	Gene body	Zm00001d009666	-1.59867	NoDiff
CHH-LPE-TCdM	Cluster_162083	LPE	CHH	200	TCdM	5'-2k	Zm00001d010106	-0.208516	NoDiff
CHH-LPE-TCdM	Cluster_162346	LPE	CHH	52	TCdM	3'-2k	Zm00001d010162	-0.0646014	AE
CHH-LPE-TCdM	Cluster_162571	LPE	CHH	7	TCdM	5'-2k	Zm00001d010218	0.67292	DHPE
CHH-LPE-TCdM	Cluster_165135	LPE	CHH	330	TCdM	5'-2k	Zm00001d010823	0.0184533	NoDiff
CHH-LPE-TCdM	Cluster_165288	LPE	CHH	270	TCdM	5'-2k	Zm00001d010859	-2.82218	NoDiff
CHH-LPE-TCdM	Cluster_165620	LPE	CHH	75	TCdM	3'-2k	Zm00001d010933	-2.67248	NoDiff
CHH-LPE-TCdM	Cluster_167160	LPE	CHH	53	TCdM	5'-2k	Zm00001d011399	Inf	NoDiff
CHH-LPE-TCdM	Cluster_167698	LPE	CHH	18	TCdM	3'-2k	Zm00001d011532	2.92064	NoDiff
CHH-LPE-TCdM	Cluster_167890	LPE	CHH	62	TCdM	5'-2k	Zm00001d011582	NA	NoDiff
CHH-LPE-TCdM	Cluster_168878	LPE	CHH	82	TCdM	3'-2k	Zm00001d011825	1.76816	NoDiff
CHH-LPE-TCdM	Cluster_169915	LPE	CHH	46	TCdM	5'-2k	Zm00001d012180	-2.02946	NoDiff
CHH-LPE-TCdM	Cluster_170217	LPE	CHH	106	TCdM	5'-2k	Zm00001d012263	-0.40728	AE
CHH-LPE-TCdM	Cluster_170353	LPE	CHH	63	TCdM	3'-2k	Zm00001d012322	-0.741153	DLPE
CHH-LPE-TCdM	Cluster_171310	LPE	CHH	162	TCdM	5'-2k	Zm00001d012653	-0.462715	NoDiff
CHH-LPE-TCdM	Cluster_171521	LPE	CHH	12	TCdM	Gene body	Zm00001d012725	-2.19901	NoDiff
CHH-LPE-TCdM	Cluster_171750	LPE	CHH	66	TCdM	5'-2k	Zm00001d012791	25.9274	NoDiff
CHH-LPE-TCdM	Cluster_99311	LPE	CHH	85	TCdM	3'-2k	Zm00001d012816	-0.17131	AE
CHH-LPE-TCdM	Cluster_99319	LPE	CHH	5	TCdM	Gene body	Zm00001d012820	0.793191	NoDiff
CHH-LPE-TCdM	Cluster_99361	LPE	CHH	24	TCdM	3'-2k	Zm00001d012856	-1.33413	NoDiff
CHH-LPE-TCdM	Cluster_99514	LPE	CHH	13	TCdM	3'-2k	Zm00001d012920	-1	NoDiff
CHH-LPE-TCdM	Cluster_99513	LPE	CHH	199	TCdM	3'-2k	Zm00001d012920	-1	NoDiff
CHH-LPE-TCdM	Cluster_99725	LPE	CHH	15	TCdM	3'-2k	Zm00001d013021	-4.56393	NoDiff
CHH-LPE-TCdM	Cluster_100046	LPE	CHH	36	TCdM	5'-2k	Zm00001d013138	-0.378713	AE
CHH-LPE-TCdM	Cluster_100056	LPE	CHH	28	TCdM	3'-2k	Zm00001d013141	-0.358425	NoDiff
CHH-LPE-TCdM	Cluster_100315	LPE	CHH	43	TCdM	5'-2k	Zm00001d013254	1.00531	DHPE
CHH-LPE-TCdM	Cluster_101145	LPE	CHH	377	TCdM	3'-2k	Zm00001d013526	-2.68925	NoDiff
CHH-LPE-TCdM	Cluster_101148	LPE	CHH	110	TCdM	5'-2k	Zm00001d013526	-2.68925	NoDiff
CHH-LPE-TCdM	Cluster_101278	LPE	CHH	136	TCdM	5'-2k	Zm00001d013575	NA	NoDiff
CHH-LPE-TCdM	Cluster_101710	LPE	CHH	38	TCdM	Gene body	Zm00001d013713	-0.186788	AE
CHH-LPE-TCdM	Cluster_102366	LPE	CHH	22	TCdM	5'-2k	Zm00001d013885	-0.17884	AE
CHH-LPE-TCdM	Cluster_102523	LPE	CHH	32	TCdM	3'-2k	Zm00001d013931	NA	NoDiff
CHH-LPE-TCdM	Cluster_102811	LPE	CHH	24	TCdM	3'-2k	Zm00001d013992	-0.22466	AE
CHH-LPE-TCdM	Cluster_103748	LPE	CHH	59	TCdM	3'-2k	Zm00001d014193	NA	NoDiff
CHH-LPE-TCdM	Cluster_103855	LPE	CHH	137	TCdM	Gene body	Zm00001d014210	NA	NoDiff
CHH-LPE-TCdM	Cluster_105814	LPE	CHH	63	TCdM	5'-2k	Zm00001d014597	3.51696	NoDiff
CHH-LPE-TCdM	Cluster_106085	LPE	CHH	33	TCdM	Gene body	Zm00001d014657	2.8599	NoDiff
CHH-LPE-TCdM	Cluster_107447	LPE	CHH	49	TCdM	5'-2k	Zm00001d015059	0.231266	AE
CHH-LPE-TCdM	Cluster_107554	LPE	CHH	82	TCdM	5'-2k	Zm00001d015097	0.0647013	AE
CHH-LPE-TCdM	Cluster_108412	LPE	CHH	93	TCdM	3'-2k	Zm00001d015349	-0.609175	NoDiff
CHH-LPE-TCdM	Cluster_110005	LPE	CHH	78	TCdM	5'-2k	Zm00001d015700	1.77871	NoDiff
CHH-LPE-TCdM	Cluster_110244	LPE	CHH	144	TCdM	3'-2k	Zm00001d015723	1.19019	DHPE
CHH-LPE-TCdM	Cluster_110636	LPE	CHH	104	TCdM	5'-2k	Zm00001d015788	-1.4389	NoDiff
CHH-LPE-TCdM	Cluster_110678	LPE	CHH	172	TCdM	5'-2k	Zm00001d015791	Inf	NoDiff
CHH-LPE-TCdM	Cluster_110692	LPE	CHH	108	TCdM	5'-2k	Zm00001d015795	-0.131861	NoDiff
CHH-LPE-TCdM	Cluster_111682	LPE	CHH	102	TCdM	5'-2k	Zm00001d015976	-0.136606	NoDiff
CHH-LPE-TCdM	Cluster_111818	LPE	CHH	72	TCdM	Gene body	Zm00001d015992	-0.578525	NoDiff
CHH-LPE-TCdM	Cluster_112360	LPE	CHH	144	TCdM	3'-2k	Zm00001d016101	0.10045	AE
CHH-LPE-TCdM	Cluster_114205	LPE	CHH	103	TCdM	3'-2k	Zm00001d016511	-3.4501	NoDiff
CHH-LPE-TCdM	Cluster_114803	LPE	CHH	106	TCdM	5'-2k	Zm00001d016669	-0.451039	NoDiff
CHH-LPE-TCdM	Cluster_115238	LPE	CHH	88	TCdM	Gene body	Zm00001d016811	-0.752417	DLPE
CHH-LPE-TCdM	Cluster_115392	LPE	CHH	34	TCdM	5'-2k	Zm00001d016847	-2.24581	NoDiff
CHH-LPE-TCdM	Cluster_115534	LPE	CHH	41	TCdM	5'-2k	Zm00001d016900	NA	NoDiff
CHH-LPE-TCdM	Cluster_115535	LPE	CHH	68	TCdM	5'-2k	Zm00001d016900	NA	NoDiff
CHH-LPE-TCdM	Cluster_115649	LPE	CHH	69	TCdM	5'-2k	Zm00001d016939	NA	NoDiff
CHH-LPE-TCdM	Cluster_115727	LPE	CHH	57	TCdM	Gene body	Zm00001d016957	-0.611243	NoDiff
CHH-LPE-TCdM	Cluster_116840	LPE	CHH	257	TCdM	3'-2k	Zm00001d017296	-2.55667	NoDiff
CHH-LPE-TCdM	Cluster_116841	LPE	CHH	84	TCdM	5'-2k	Zm00001d017297	NA	NoDiff
CHH-LPE-TCdM	Cluster_117056	LPE	CHH	171	TCdM	3'-2k	Zm00001d017368	Inf	NoDiff
CHH-LPE-TCdM	Cluster_117104	LPE	CHH	369	TCdM	5'-2k	Zm00001d017382	14.3083	NoDiff
CHH-LPE-TCdM	Cluster_117148	LPE	CHH	68	TCdM	3'-2k	Zm00001d017392	-0.265315	NoDiff
CHH-LPE-TCdM	Cluster_117397	LPE	CHH	48	TCdM	3'-2k	Zm00001d017455	-5.28016	NoDiff
CHH-LPE-TCdM	Cluster_117481	LPE	CHH	125	TCdM	5'-2k	Zm00001d017476	-2.91041	NoDiff
CHH-LPE-TCdM	Cluster_117691	LPE	CHH	52	TCdM	3'-2k	Zm00001d017530	0.0193785	AE
CHH-LPE-TCdM	Cluster_118272	LPE	CHH	82	TCdM	3'-2k	Zm00001d017682	-2.52167	NoDiff
CHH-LPE-TCdM	Cluster_118478	LPE	CHH	54	TCdM	5'-2k	Zm00001d017746	2.98797	NoDiff
CHH-LPE-TCdM	Cluster_118614	LPE	CHH	53	TCdM	3'-2k	Zm00001d017790	-0.643134	NoDiff
CHH-LPE-TCdM	Cluster_118763	LPE	CHH	66	TCdM	5'-2k	Zm00001d017820	-19.8871	NoDiff
CHH-LPE-TCdM	Cluster_119331	LPE	CHH	71	TCdM	5'-2k	Zm00001d017992	0.539289	NoDiff
CHH-LPE-TCdM	Cluster_119440	LPE	CHH	48	TCdM	5'-2k	Zm00001d018034	4.19472	NoDiff
CHH-LPE-TCdM	Cluster_120182	LPE	CHH	86	TCdM	5'-2k	Zm00001d018276	0.260025	AE
CHH-LPE-TCdM	Cluster_138427	LPE	CHH	18	TCdM	5'-2k	Zm00001d018839	-0.0925616	AE
CHH-LPE-TCdM	Cluster_138696	LPE	CHH	40	TCdM	Gene body	Zm00001d018935	-0.851981	NoDiff
CHH-LPE-TCdM	Cluster_138752	LPE	CHH	40	TCdM	3'-2k	Zm00001d018950	NA	NoDiff
CHH-LPE-TCdM	Cluster_138829	LPE	CHH	45	TCdM	Gene body	Zm00001d018971	NA	NoDiff
CHH-LPE-TCdM	Cluster_140226	LPE	CHH	65	TCdM	5'-2k	Zm00001d019325	0.06999	NoDiff
CHH-LPE-TCdM	Cluster_140466	LPE	CHH	133	TCdM	5'-2k	Zm00001d019374	-0.568221	NoDiff
CHH-LPE-TCdM	Cluster_140606	LPE	CHH	76	TCdM	3'-2k	Zm00001d019407	-0.101824	AE
CHH-LPE-TCdM	Cluster_140638	LPE	CHH	72	TCdM	3'-2k	Zm00001d019423	10.1309	NoDiff
CHH-LPE-TCdM	Cluster_140732	LPE	CHH	50	TCdM	Gene body	Zm00001d019454	0.365278	AE
CHH-LPE-TCdM	Cluster_145054	LPE	CHH	103	TCdM	3'-2k	Zm00001d020282	-0.359719	NoDiff
CHH-LPE-TCdM	Cluster_146281	LPE	CHH	70	TCdM	Gene body	Zm00001d020483	Inf	NoDiff
CHH-LPE-TCdM	Cluster_146598	LPE	CHH	178	TCdM	Gene body	Zm00001d020538	-0.644306	DLPE
CHH-LPE-TCdM	Cluster_146870	LPE	CHH	43	TCdM	3'-2k	Zm00001d020593	2.34547	NoDiff
CHH-LPE-TCdM	Cluster_147613	LPE	CHH	281	TCdM	3'-2k	Zm00001d020732	1.04707	NoDiff
CHH-LPE-TCdM	Cluster_147865	LPE	CHH	132	TCdM	3'-2k	Zm00001d020805	NA	NoDiff
CHH-LPE-TCdM	Cluster_148427	LPE	CHH	71	TCdM	3'-2k	Zm00001d020968	-0.989595	NoDiff
CHH-LPE-TCdM	Cluster_149057	LPE	CHH	43	TCdM	5'-2k	Zm00001d021140	-0.34163	NoDiff
CHH-LPE-TCdM	Cluster_149121	LPE	CHH	43	TCdM	3'-2k	Zm00001d021164	NA	NoDiff
CHH-LPE-TCdM	Cluster_149233	LPE	CHH	139	TCdM	5'-2k	Zm00001d021207	-0.5447	NoDiff
CHH-LPE-TCdM	Cluster_149507	LPE	CHH	62	TCdM	5'-2k	Zm00001d021294	-10.8696	NoDiff
CHH-LPE-TCdM	Cluster_150158	LPE	CHH	94	TCdM	5'-2k	Zm00001d021473	-0.312488	AE
CHH-LPE-TCdM	Cluster_150396	LPE	CHH	42	TCdM	5'-2k	Zm00001d021524	-0.71917	NoDiff
CHH-LPE-TCdM	Cluster_150952	LPE	CHH	49	TCdM	3'-2k	Zm00001d021647	0.418738	AE
CHH-LPE-TCdM	Cluster_151715	LPE	CHH	102	TCdM	3'-2k	Zm00001d021862	6.31976	NoDiff
CHH-LPE-TCdM	Cluster_151777	LPE	CHH	41	TCdM	3'-2k	Zm00001d021880	0.45004	NoDiff
CHH-LPE-TCdM	Cluster_151833	LPE	CHH	5	TCdM	5'-2k	Zm00001d021910	0.565027	NoDiff
CHH-LPE-TCdM	Cluster_152202	LPE	CHH	101	TCdM	Gene body	Zm00001d022050	-0.311999	NoDiff
CHH-LPE-TCdM	Cluster_153245	LPE	CHH	152	TCdM	Gene body	Zm00001d022395	0.079871	AE
CHH-LPE-TCdM	Cluster_153636	LPE	CHH	70	TCdM	5'-2k	Zm00001d022488	-0.532194	NoDiff
CHH-LPE-TCdM	Cluster_188062	LPE	CHH	38	TCdM	3'-2k	Zm00001d023399	-1	NoDiff
CHH-LPE-TCdM	Cluster_188110	LPE	CHH	145	TCdM	3'-2k	Zm00001d023417	-1	NoDiff
CHH-LPE-TCdM	Cluster_188587	LPE	CHH	49	TCdM	3'-2k	Zm00001d023554	-0.233484	NoDiff
CHH-LPE-TCdM	Cluster_188974	LPE	CHH	29	TCdM	3'-2k	Zm00001d023661	-1	NoDiff
CHH-LPE-TCdM	Cluster_189048	LPE	CHH	77	TCdM	Gene body	Zm00001d023682	-2.25183	NoDiff
CHH-LPE-TCdM	Cluster_189651	LPE	CHH	35	TCdM	5'-2k	Zm00001d023839	3.0029	NoDiff
CHH-LPE-TCdM	Cluster_190414	LPE	CHH	50	TCdM	3'-2k	Zm00001d024018	-0.378143	AE
CHH-LPE-TCdM	Cluster_191145	LPE	CHH	130	TCdM	5'-2k	Zm00001d024166	11.0482	THPE
CHH-LPE-TCdM	Cluster_195439	LPE	CHH	139	TCdM	5'-2k	Zm00001d025050	-6.45455	NoDiff
CHH-LPE-TCdM	Cluster_195510	LPE	CHH	150	TCdM	5'-2k	Zm00001d025063	1.70179	NoDiff
CHH-LPE-TCdM	Cluster_196831	LPE	CHH	95	TCdM	3'-2k	Zm00001d025322	0.787581	NoDiff
CHH-LPE-TCdM	Cluster_197355	LPE	CHH	195	TCdM	3'-2k	Zm00001d025431	-1.70602	NoDiff
CHH-LPE-TCdM	Cluster_197833	LPE	CHH	88	TCdM	3'-2k	Zm00001d025577	NA	NoDiff
CHH-LPE-TCdM	Cluster_198020	LPE	CHH	9	TCdM	5'-2k	Zm00001d025645	-1	NoDiff
CHH-LPE-TCdM	Cluster_198400	LPE	CHH	44	TCdM	5'-2k	Zm00001d025754	8.82444	NoDiff
CHH-LPE-TCdM	Cluster_199770	LPE	CHH	185	TCdM	5'-2k	Zm00001d026146	NA	NoDiff
CHH-LPE-TCdM	Cluster_706	LPE	CHH	76	TCdM	3'-2k	Zm00001d027448	0.0945504	AE
CHH-LPE-TCdM	Cluster_1016	LPE	CHH	97	TCdM	Gene body	Zm00001d027535	-0.466505	AE
CHH-LPE-TCdM	Cluster_1166	LPE	CHH	110	TCdM	3'-2k	Zm00001d027576	-0.0197932	AE
CHH-LPE-TCdM	Cluster_1989	LPE	CHH	79	TCdM	Gene body	Zm00001d027805	0.0318765	AE
CHH-LPE-TCdM	Cluster_2016	LPE	CHH	197	TCdM	5'-2k	Zm00001d027809	3.83015	NoDiff
CHH-LPE-TCdM	Cluster_2080	LPE	CHH	191	TCdM	Gene body	Zm00001d027841	-4.63837	NoDiff
CHH-LPE-TCdM	Cluster_2239	LPE	CHH	116	TCdM	3'-2k	Zm00001d027868	1.30581	NoDiff
CHH-LPE-TCdM	Cluster_2873	LPE	CHH	62	TCdM	5'-2k	Zm00001d028013	0.0145016	NoDiff
CHH-LPE-TCdM	Cluster_3034	LPE	CHH	43	TCdM	5'-2k	Zm00001d028071	-1.17806	NoDiff
CHH-LPE-TCdM	Cluster_3039	LPE	CHH	56	TCdM	Gene body	Zm00001d028073	1.15069	NoDiff
CHH-LPE-TCdM	Cluster_3216	LPE	CHH	95	TCdM	Gene body	Zm00001d028128	40.3648	NoDiff
CHH-LPE-TCdM	Cluster_3426	LPE	CHH	10	TCdM	5'-2k	Zm00001d028173	-5.53213	NoDiff
CHH-LPE-TCdM	Cluster_4495	LPE	CHH	7	TCdM	3'-2k	Zm00001d028441	NA	NoDiff
CHH-LPE-TCdM	Cluster_4704	LPE	CHH	69	TCdM	3'-2k	Zm00001d028495	121.888	NoDiff
CHH-LPE-TCdM	Cluster_4720	LPE	CHH	155	TCdM	3'-2k	Zm00001d028501	NA	NoDiff
CHH-LPE-TCdM	Cluster_5437	LPE	CHH	60	TCdM	5'-2k	Zm00001d028720	-4.64238	NoDiff
CHH-LPE-TCdM	Cluster_5671	LPE	CHH	65	TCdM	3'-2k	Zm00001d028782	-0.999838	NoDiff
CHH-LPE-TCdM	Cluster_7081	LPE	CHH	68	TCdM	Gene body	Zm00001d029134	-2.51627	NoDiff
CHH-LPE-TCdM	Cluster_7440	LPE	CHH	81	TCdM	5'-2k	Zm00001d029241	1.75954	NoDiff
CHH-LPE-TCdM	Cluster_7985	LPE	CHH	27	TCdM	Gene body	Zm00001d029391	5.23031	NoDiff
CHH-LPE-TCdM	Cluster_8459	LPE	CHH	22	TCdM	Gene body	Zm00001d029502	16.3883	THPE
CHH-LPE-TCdM	Cluster_8822	LPE	CHH	138	TCdM	5'-2k	Zm00001d029576	-3.99937	NoDiff
CHH-LPE-TCdM	Cluster_10316	LPE	CHH	13	TCdM	3'-2k	Zm00001d029932	-0.35377	NoDiff
CHH-LPE-TCdM	Cluster_10390	LPE	CHH	159	TCdM	3'-2k	Zm00001d029940	-0.884153	NoDiff
CHH-LPE-TCdM	Cluster_11171	LPE	CHH	66	TCdM	3'-2k	Zm00001d030130	0.0602823	AE
CHH-LPE-TCdM	Cluster_11253	LPE	CHH	94	TCdM	3'-2k	Zm00001d030147	NA	NoDiff
CHH-LPE-TCdM	Cluster_14796	LPE	CHH	32	TCdM	5'-2k	Zm00001d030859	-0.227299	NoDiff
CHH-LPE-TCdM	Cluster_15845	LPE	CHH	77	TCdM	5'-2k	Zm00001d031066	NA	NoDiff
CHH-LPE-TCdM	Cluster_16164	LPE	CHH	41	TCdM	Gene body	Zm00001d031145	-0.113739	AE
CHH-LPE-TCdM	Cluster_16204	LPE	CHH	15	TCdM	5'-2k	Zm00001d031158	-1.09415	NoDiff
CHH-LPE-TCdM	Cluster_17232	LPE	CHH	85	TCdM	3'-2k	Zm00001d031533	-0.992826	NoDiff
CHH-LPE-TCdM	Cluster_18143	LPE	CHH	12	TCdM	3'-2k	Zm00001d031814	2.62396	NoDiff
CHH-LPE-TCdM	Cluster_18255	LPE	CHH	130	TCdM	Gene body	Zm00001d031853	0.289181	AE
CHH-LPE-TCdM	Cluster_18419	LPE	CHH	43	TCdM	5'-2k	Zm00001d031898	-0.59067	NoDiff
CHH-LPE-TCdM	Cluster_18733	LPE	CHH	134	TCdM	5'-2k	Zm00001d031994	3.23163	THPE
CHH-LPE-TCdM	Cluster_19430	LPE	CHH	115	TCdM	Gene body	Zm00001d032143	-2.65724	NoDiff
CHH-LPE-TCdM	Cluster_19989	LPE	CHH	128	TCdM	Gene body	Zm00001d032256	-0.398013	NoDiff
CHH-LPE-TCdM	Cluster_20786	LPE	CHH	26	TCdM	Gene body	Zm00001d032432	-1	NoDiff
CHH-LPE-TCdM	Cluster_20952	LPE	CHH	124	TCdM	5'-2k	Zm00001d032473	0.509131	NoDiff
CHH-LPE-TCdM	Cluster_21711	LPE	CHH	225	TCdM	5'-2k	Zm00001d032671	-5.99462	NoDiff
CHH-LPE-TCdM	Cluster_21714	LPE	CHH	217	TCdM	5'-2k	Zm00001d032672	0.363905	AE
CHH-LPE-TCdM	Cluster_23164	LPE	CHH	114	TCdM	5'-2k	Zm00001d032992	-1.92508	NoDiff
CHH-LPE-TCdM	Cluster_23236	LPE	CHH	55	TCdM	5'-2k	Zm00001d033003	0.681725	NoDiff
CHH-LPE-TCdM	Cluster_23906	LPE	CHH	53	TCdM	5'-2k	Zm00001d033167	-2.10464	NoDiff
CHH-LPE-TCdM	Cluster_24055	LPE	CHH	140	TCdM	5'-2k	Zm00001d033200	NA	NoDiff
CHH-LPE-TCdM	Cluster_24093	LPE	CHH	74	TCdM	3'-2k	Zm00001d033207	NA	NoDiff
CHH-LPE-TCdM	Cluster_24196	LPE	CHH	26	TCdM	3'-2k	Zm00001d033230	1.37305	NoDiff
CHH-LPE-TCdM	Cluster_24696	LPE	CHH	66	TCdM	5'-2k	Zm00001d033338	-0.170957	NoDiff
CHH-LPE-TCdM	Cluster_24701	LPE	CHH	132	TCdM	3'-2k	Zm00001d033339	-3.77199	NoDiff
CHH-LPE-TCdM	Cluster_26258	LPE	CHH	50	TCdM	Gene body	Zm00001d033764	2.32266	NoDiff
CHH-LPE-TCdM	Cluster_26319	LPE	CHH	31	TCdM	5'-2k	Zm00001d033786	-0.0366393	NoDiff
CHH-LPE-TCdM	Cluster_26509	LPE	CHH	4	TCdM	3'-2k	Zm00001d033842	2.98531	NoDiff
CHH-LPE-TCdM	Cluster_27114	LPE	CHH	27	TCdM	5'-2k	Zm00001d034003	-1	NoDiff
CHH-LPE-TCdM	Cluster_27207	LPE	CHH	61	TCdM	3'-2k	Zm00001d034023	-1.26331	NoDiff
CHH-LPE-TCdM	Cluster_27216	LPE	CHH	89	TCdM	5'-2k	Zm00001d034026	0.675396	NoDiff
CHH-LPE-TCdM	Cluster_27406	LPE	CHH	227	TCdM	5'-2k	Zm00001d034076	7.75455	THPE
CHH-LPE-TCdM	Cluster_28104	LPE	CHH	19	TCdM	5'-2k	Zm00001d034266	NA	NoDiff
CHH-LPE-TCdM	Cluster_28281	LPE	CHH	136	TCdM	5'-2k	Zm00001d034327	-0.398158	NoDiff
CHH-LPE-TCdM	Cluster_29054	LPE	CHH	55	TCdM	5'-2k	Zm00001d034568	0.965066	NoDiff
CHH-LPE-TCdM	Cluster_29201	LPE	CHH	237	TCdM	5'-2k	Zm00001d034600	-1.54116	NoDiff
CHH-LPE-TCdM	Cluster_29592	LPE	CHH	77	TCdM	3'-2k	Zm00001d034731	79.3714	NoDiff
CHH-LPE-TCdM	Cluster_29944	LPE	CHH	65	TCdM	5'-2k	Zm00001d034844	NA	NoDiff
CHH-LPE-TCdM	Cluster_121252	LPE	CHH	44	TCdM	5'-2k	Zm00001d035013	-0.952524	DLPE
CHH-LPE-TCdM	Cluster_121706	LPE	CHH	89	TCdM	5'-2k	Zm00001d035163	-1	NoDiff
CHH-LPE-TCdM	Cluster_122431	LPE	CHH	136	TCdM	Gene body	Zm00001d035342	1.10006	NoDiff
CHH-LPE-TCdM	Cluster_123881	LPE	CHH	56	TCdM	5'-2k	Zm00001d035642	-1	NoDiff
CHH-LPE-TCdM	Cluster_126863	LPE	CHH	181	TCdM	3'-2k	Zm00001d036382	6.65054	NoDiff
CHH-LPE-TCdM	Cluster_127652	LPE	CHH	172	TCdM	Gene body	Zm00001d036613	-0.34472	AE
CHH-LPE-TCdM	Cluster_128084	LPE	CHH	135	TCdM	5'-2k	Zm00001d036712	1.64259	NoDiff
CHH-LPE-TCdM	Cluster_128220	LPE	CHH	23	TCdM	5'-2k	Zm00001d036738	-0.971628	DLPE
CHH-LPE-TCdM	Cluster_129285	LPE	CHH	11	TCdM	5'-2k	Zm00001d037030	NA	NoDiff
CHH-LPE-TCdM	Cluster_129584	LPE	CHH	176	TCdM	5'-2k	Zm00001d037099	-0.0766247	NoDiff
CHH-LPE-TCdM	Cluster_129810	LPE	CHH	129	TCdM	3'-2k	Zm00001d037152	0.447721	NoDiff
CHH-LPE-TCdM	Cluster_130935	LPE	CHH	33	TCdM	5'-2k	Zm00001d037401	72.9708	NoDiff
CHH-LPE-TCdM	Cluster_131756	LPE	CHH	62	TCdM	Gene body	Zm00001d037615	1.4871	NoDiff
CHH-LPE-TCdM	Cluster_132961	LPE	CHH	51	TCdM	Gene body	Zm00001d037854	-1	NoDiff
CHH-LPE-TCdM	Cluster_133121	LPE	CHH	27	TCdM	5'-2k	Zm00001d037915	0.171931	NoDiff
CHH-LPE-TCdM	Cluster_133825	LPE	CHH	72	TCdM	5'-2k	Zm00001d038087	0.319681	NoDiff
CHH-LPE-TCdM	Cluster_134160	LPE	CHH	40	TCdM	Gene body	Zm00001d038164	-0.93971	NoDiff
CHH-LPE-TCdM	Cluster_134677	LPE	CHH	96	TCdM	3'-2k	Zm00001d038281	-0.687376	NoDiff
CHH-LPE-TCdM	Cluster_135404	LPE	CHH	43	TCdM	3'-2k	Zm00001d038475	1.23439	NoDiff
CHH-LPE-TCdM	Cluster_135412	LPE	CHH	12	TCdM	5'-2k	Zm00001d038480	-0.591868	DLPE
CHH-LPE-TCdM	Cluster_135440	LPE	CHH	127	TCdM	5'-2k	Zm00001d038490	NA	NoDiff
CHH-LPE-TCdM	Cluster_135851	LPE	CHH	25	TCdM	5'-2k	Zm00001d038642	1.06509	NoDiff
CHH-LPE-TCdM	Cluster_136044	LPE	CHH	90	TCdM	3'-2k	Zm00001d038706	-1.70877	NoDiff
CHH-LPE-TCdM	Cluster_136366	LPE	CHH	143	TCdM	3'-2k	Zm00001d038820	0.0872543	AE
CHH-LPE-TCdM	Cluster_136373	LPE	CHH	129	TCdM	Gene body	Zm00001d038823	-0.278999	NoDiff
CHH-LPE-TCdM	Cluster_136772	LPE	CHH	21	TCdM	3'-2k	Zm00001d038965	8.46607	NoDiff
CHH-LPE-TCdM	Cluster_136958	LPE	CHH	41	TCdM	3'-2k	Zm00001d039040	1.18944	NoDiff
CHH-LPE-TCdM	Cluster_136967	LPE	CHH	29	TCdM	3'-2k	Zm00001d039041	0.520666	NoDiff
CHH-LPE-TCdM	Cluster_54051	LPE	CHH	68	TCdM	3'-2k	Zm00001d039301	-0.360172	AE
CHH-LPE-TCdM	Cluster_54157	LPE	CHH	42	TCdM	Gene body	Zm00001d039334	NA	NoDiff
CHH-LPE-TCdM	Cluster_54910	LPE	CHH	34	TCdM	5'-2k	Zm00001d039567	-1.36957	NoDiff
CHH-LPE-TCdM	Cluster_54927	LPE	CHH	116	TCdM	5'-2k	Zm00001d039575	-1.32561	NoDiff
CHH-LPE-TCdM	Cluster_55188	LPE	CHH	43	TCdM	3'-2k	Zm00001d039643	-3.08346	NoDiff
CHH-LPE-TCdM	Cluster_55886	LPE	CHH	105	TCdM	5'-2k	Zm00001d039866	1.50529	NoDiff
CHH-LPE-TCdM	Cluster_56124	LPE	CHH	113	TCdM	3'-2k	Zm00001d039928	-0.142327	AE
CHH-LPE-TCdM	Cluster_56146	LPE	CHH	133	TCdM	3'-2k	Zm00001d039936	-5.01673	NoDiff
CHH-LPE-TCdM	Cluster_56715	LPE	CHH	79	TCdM	Gene body	Zm00001d040061	0.961512	DHPE
CHH-LPE-TCdM	Cluster_57137	LPE	CHH	94	TCdM	3'-2k	Zm00001d040158	2.17311	NoDiff
CHH-LPE-TCdM	Cluster_57288	LPE	CHH	53	TCdM	3'-2k	Zm00001d040178	-1.39395	NoDiff
CHH-LPE-TCdM	Cluster_58187	LPE	CHH	83	TCdM	3'-2k	Zm00001d040413	NA	NoDiff
CHH-LPE-TCdM	Cluster_62867	LPE	CHH	20	TCdM	3'-2k	Zm00001d041407	-3.54602	NoDiff
CHH-LPE-TCdM	Cluster_63089	LPE	CHH	46	TCdM	5'-2k	Zm00001d041448	0.310481	NoDiff
CHH-LPE-TCdM	Cluster_63750	LPE	CHH	52	TCdM	5'-2k	Zm00001d041601	-0.143157	NoDiff
CHH-LPE-TCdM	Cluster_64098	LPE	CHH	45	TCdM	5'-2k	Zm00001d041681	Inf	NoDiff
CHH-LPE-TCdM	Cluster_64452	LPE	CHH	59	TCdM	Gene body	Zm00001d041777	NA	NoDiff
CHH-LPE-TCdM	Cluster_64969	LPE	CHH	106	TCdM	3'-2k	Zm00001d041904	NA	NoDiff
CHH-LPE-TCdM	Cluster_65027	LPE	CHH	68	TCdM	5'-2k	Zm00001d041919	NA	NoDiff
CHH-LPE-TCdM	Cluster_65028	LPE	CHH	104	TCdM	3'-2k	Zm00001d041920	-1.20052	NoDiff
CHH-LPE-TCdM	Cluster_65583	LPE	CHH	34	TCdM	Gene body	Zm00001d042066	5.85691	NoDiff
CHH-LPE-TCdM	Cluster_65686	LPE	CHH	227	TCdM	5'-2k	Zm00001d042094	0.835292	NoDiff
CHH-LPE-TCdM	Cluster_66869	LPE	CHH	55	TCdM	5'-2k	Zm00001d042354	1.17245	NoDiff
CHH-LPE-TCdM	Cluster_68940	LPE	CHH	45	TCdM	5'-2k	Zm00001d042879	0.200929	NoDiff
CHH-LPE-TCdM	Cluster_69156	LPE	CHH	77	TCdM	3'-2k	Zm00001d042926	4.01374	NoDiff
CHH-LPE-TCdM	Cluster_69459	LPE	CHH	29	TCdM	3'-2k	Zm00001d043000	NA	NoDiff
CHH-LPE-TCdM	Cluster_70951	LPE	CHH	37	TCdM	5'-2k	Zm00001d043354	0.301413	AE
CHH-LPE-TCdM	Cluster_71112	LPE	CHH	64	TCdM	Gene body	Zm00001d043393	-1.20528	NoDiff
CHH-LPE-TCdM	Cluster_71234	LPE	CHH	28	TCdM	Gene body	Zm00001d043428	6.42993	NoDiff
CHH-LPE-TCdM	Cluster_71343	LPE	CHH	13	TCdM	5'-2k	Zm00001d043458	2.79519	NoDiff
CHH-LPE-TCdM	Cluster_71427	LPE	CHH	76	TCdM	Gene body	Zm00001d043479	7.53318	NoDiff
CHH-LPE-TCdM	Cluster_71582	LPE	CHH	77	TCdM	Gene body	Zm00001d043520	3.06341	NoDiff
CHH-LPE-TCdM	Cluster_71583	LPE	CHH	93	TCdM	Gene body	Zm00001d043520	3.06341	NoDiff
CHH-LPE-TCdM	Cluster_71718	LPE	CHH	56	TCdM	3'-2k	Zm00001d043555	-1.67793	NoDiff
CHH-LPE-TCdM	Cluster_71807	LPE	CHH	5	TCdM	5'-2k	Zm00001d043578	42.1274	NoDiff
CHH-LPE-TCdM	Cluster_71905	LPE	CHH	76	TCdM	Gene body	Zm00001d043604	-1	NoDiff
CHH-LPE-TCdM	Cluster_73518	LPE	CHH	101	TCdM	5'-2k	Zm00001d044014	NA	NoDiff
CHH-LPE-TCdM	Cluster_73591	LPE	CHH	71	TCdM	5'-2k	Zm00001d044024	5.34082	NoDiff
CHH-LPE-TCdM	Cluster_73721	LPE	CHH	54	TCdM	Gene body	Zm00001d044053	-0.172083	NoDiff
CHH-LPE-TCdM	Cluster_74581	LPE	CHH	19	TCdM	3'-2k	Zm00001d044264	1.38948	NoDiff
CHH-LPE-TCdM	Cluster_74747	LPE	CHH	52	TCdM	3'-2k	Zm00001d044297	1.66602	NoDiff
CHH-LPE-TCdM	Cluster_75221	LPE	CHH	70	TCdM	5'-2k	Zm00001d044429	-0.524523	NoDiff
CHH-LPE-TCdM	Cluster_75673	LPE	CHH	79	TCdM	3'-2k	Zm00001d044526	11.1526	NoDiff
CHH-LPE-TCdM	Cluster_172070	LPE	CHH	80	TCdM	3'-2k	Zm00001d044777	NA	NoDiff
CHH-LPE-TCdM	Cluster_173428	LPE	CHH	20	TCdM	5'-2k	Zm00001d045119	-85.8812	TLPE
CHH-LPE-TCdM	Cluster_173609	LPE	CHH	138	TCdM	3'-2k	Zm00001d045173	-3.53297	NoDiff
CHH-LPE-TCdM	Cluster_173866	LPE	CHH	30	TCdM	5'-2k	Zm00001d045258	-1.74752	NoDiff
CHH-LPE-TCdM	Cluster_174716	LPE	CHH	137	TCdM	5'-2k	Zm00001d045490	-0.265744	NoDiff
CHH-LPE-TCdM	Cluster_174941	LPE	CHH	156	TCdM	Gene body	Zm00001d045574	4.495	NoDiff
CHH-LPE-TCdM	Cluster_176882	LPE	CHH	57	TCdM	3'-2k	Zm00001d045991	0.810516	NoDiff
CHH-LPE-TCdM	Cluster_177515	LPE	CHH	66	TCdM	Gene body	Zm00001d046105	-1.50304	NoDiff
CHH-LPE-TCdM	Cluster_177720	LPE	CHH	77	TCdM	3'-2k	Zm00001d046152	NA	NoDiff
CHH-LPE-TCdM	Cluster_179636	LPE	CHH	330	TCdM	3'-2k	Zm00001d046537	Inf	NoDiff
CHH-LPE-TCdM	Cluster_179841	LPE	CHH	32	TCdM	3'-2k	Zm00001d046585	NA	NoDiff
CHH-LPE-TCdM	Cluster_181363	LPE	CHH	100	TCdM	5'-2k	Zm00001d046922	9.41921	NoDiff
CHH-LPE-TCdM	Cluster_183045	LPE	CHH	155	TCdM	3'-2k	Zm00001d047347	0.265075	AE
CHH-LPE-TCdM	Cluster_184621	LPE	CHH	24	TCdM	3'-2k	Zm00001d047696	2.06807	NoDiff
CHH-LPE-TCdM	Cluster_184665	LPE	CHH	51	TCdM	3'-2k	Zm00001d047711	-1	NoDiff
CHH-LPE-TCdM	Cluster_184935	LPE	CHH	17	TCdM	Gene body	Zm00001d047781	-1.15038	NoDiff
CHH-LPE-TCdM	Cluster_185102	LPE	CHH	55	TCdM	5'-2k	Zm00001d047831	2.34157	NoDiff
CHH-LPE-TCdM	Cluster_185629	LPE	CHH	52	TCdM	5'-2k	Zm00001d047974	Inf	NoDiff
CHH-LPE-TCdM	Cluster_185692	LPE	CHH	53	TCdM	5'-2k	Zm00001d047985	1.95158	NoDiff
CHH-LPE-TCdM	Cluster_185727	LPE	CHH	38	TCdM	3'-2k	Zm00001d047992	0.226306	NoDiff
CHH-LPE-TCdM	Cluster_186146	LPE	CHH	62	TCdM	3'-2k	Zm00001d048132	-1.07749	NoDiff
CHH-LPE-TCdM	Cluster_186648	LPE	CHH	24	TCdM	Gene body	Zm00001d048297	NA	NoDiff
CHH-LPE-TCdM	Cluster_187246	LPE	CHH	24	TCdM	3'-2k	Zm00001d048511	-8.65416	NoDiff
CHH-LPE-TCdM	Cluster_187245	LPE	CHH	77	TCdM	3'-2k	Zm00001d048511	-8.65416	NoDiff
CHH-LPE-TCdM	Cluster_187451	LPE	CHH	54	TCdM	3'-2k	Zm00001d048560	NA	NoDiff
CHH-LPE-TCdM	Cluster_76466	LPE	CHH	129	TCdM	3'-2k	Zm00001d048608	20.9776	NoDiff
CHH-LPE-TCdM	Cluster_76478	LPE	CHH	61	TCdM	3'-2k	Zm00001d048615	9.76395	NoDiff
CHH-LPE-TCdM	Cluster_76627	LPE	CHH	105	TCdM	3'-2k	Zm00001d048649	1.04165	NoDiff
CHH-LPE-TCdM	Cluster_76775	LPE	CHH	112	TCdM	5'-2k	Zm00001d048691	1.56628	NoDiff
CHH-LPE-TCdM	Cluster_76821	LPE	CHH	99	TCdM	5'-2k	Zm00001d048701	1.03617	NoDiff
CHH-LPE-TCdM	Cluster_77136	LPE	CHH	158	TCdM	3'-2k	Zm00001d048787	-0.764108	DLPE
CHH-LPE-TCdM	Cluster_77217	LPE	CHH	132	TCdM	3'-2k	Zm00001d048822	10.1855	NoDiff
CHH-LPE-TCdM	Cluster_77665	LPE	CHH	145	TCdM	3'-2k	Zm00001d048946	NA	NoDiff
CHH-LPE-TCdM	Cluster_79688	LPE	CHH	54	TCdM	3'-2k	Zm00001d049393	NA	NoDiff
CHH-LPE-TCdM	Cluster_80452	LPE	CHH	102	TCdM	3'-2k	Zm00001d049592	-1	NoDiff
CHH-LPE-TCdM	Cluster_81117	LPE	CHH	185	TCdM	5'-2k	Zm00001d049770	-2.96254	NoDiff
CHH-LPE-TCdM	Cluster_81567	LPE	CHH	39	TCdM	5'-2k	Zm00001d049857	-0.820677	NoDiff
CHH-LPE-TCdM	Cluster_82898	LPE	CHH	108	TCdM	5'-2k	Zm00001d050109	4.17578	NoDiff
CHH-LPE-TCdM	Cluster_83275	LPE	CHH	72	TCdM	3'-2k	Zm00001d050174	0.881169	NoDiff
CHH-LPE-TCdM	Cluster_83518	LPE	CHH	125	TCdM	3'-2k	Zm00001d050225	-0.326437	NoDiff
CHH-LPE-TCdM	Cluster_84707	LPE	CHH	63	TCdM	5'-2k	Zm00001d050479	NA	NoDiff
CHH-LPE-TCdM	Cluster_87160	LPE	CHH	45	TCdM	3'-2k	Zm00001d050965	-4.35736	NoDiff
CHH-LPE-TCdM	Cluster_87940	LPE	CHH	44	TCdM	Gene body	Zm00001d051161	-2.90286	TLPE
CHH-LPE-TCdM	Cluster_89523	LPE	CHH	128	TCdM	3'-2k	Zm00001d051556	0.937083	NoDiff
CHH-LPE-TCdM	Cluster_89884	LPE	CHH	11	TCdM	3'-2k	Zm00001d051658	3.45021	NoDiff
CHH-LPE-TCdM	Cluster_90088	LPE	CHH	97	TCdM	Gene body	Zm00001d051720	NA	NoDiff
CHH-LPE-TCdM	Cluster_90546	LPE	CHH	88	TCdM	3'-2k	Zm00001d051865	0.131203	NoDiff
CHH-LPE-TCdM	Cluster_90712	LPE	CHH	12	TCdM	Gene body	Zm00001d051911	2.75288	NoDiff
CHH-LPE-TCdM	Cluster_91314	LPE	CHH	106	TCdM	3'-2k	Zm00001d052093	0.460031	NoDiff
CHH-LPE-TCdM	Cluster_91680	LPE	CHH	157	TCdM	5'-2k	Zm00001d052184	6.61412	NoDiff
CHH-LPE-TCdM	Cluster_92481	LPE	CHH	41	TCdM	5'-2k	Zm00001d052396	-0.621052	NoDiff
CHH-LPE-TCdM	Cluster_93626	LPE	CHH	40	TCdM	5'-2k	Zm00001d052714	NA	NoDiff
CHH-LPE-TCdM	Cluster_94616	LPE	CHH	47	TCdM	3'-2k	Zm00001d052981	-0.0947143	NoDiff
CHH-LPE-TCdM	Cluster_97693	LPE	CHH	282	TCdM	5'-2k	Zm00001d053587	3.28552	NoDiff
CHH-LPE-TCdM	Cluster_97926	LPE	CHH	70	TCdM	3'-2k	Zm00001d053630	0.111881	AE
CHH-LPE-TCdM	Cluster_98214	LPE	CHH	20	TCdM	Gene body	Zm00001d053706	3.24327	THPE
CHH-LPE-TCdM	Cluster_98691	LPE	CHH	13	TCdM	Gene body	Zm00001d053878	-2.11225	NoDiff
CHH-LPE-TCdM	Cluster_99004	LPE	CHH	145	TCdM	Gene body	Zm00001d054031	0.0538949	AE
